# Supplementary material for: Identification of Subtype-Specific Metastasis-Related Genetic Signatures in Sarcoma
Source: Front Oncol. 2020 Oct 6;10:544956. doi: 10.3389/fonc.2020.544956 (PMC7573283; doi:10.3389/fonc.2020.544956)
Supplement: Supplementary file 1 [file Table_1.XLS]

TransID	baseMean	log2FoldChange	lfcSE	stat	pvalue	padj
GPR98	56.2885094980322	3.68088255089595	0.514841098586467	7.14955072740323	8.70623714651124e-13	1.83893270225032e-08
PIP5K1B	269.355144611089	2.90426372570262	0.412959789332525	7.03280028885338	2.02429017149852e-12	1.83893270225032e-08
BPIFB4	538.363026370503	6.60525740178251	0.939476588605016	7.03078446221884	2.05375553076873e-12	1.83893270225032e-08
ACTA1	133.81836433667	3.86580719962462	0.554017324190105	6.97777313241221	2.99895406147196e-12	2.01394759998149e-08
BMP5	496.584904018113	6.89295087438414	1.01040965993817	6.82193683184499	8.98211639486359e-12	4.82555221197652e-08
TNNC1	46.0957837304156	3.47740193687951	0.526490789844572	6.60486755695401	3.97872884111986e-11	1.78127690216936e-07
MYOCD	139.879959116735	3.60105264539281	0.55624354770691	6.47387760314343	9.55192869024568e-11	3.6654844068197e-07
PCK1	139.533183142758	4.61993168716236	0.72527888068131	6.3698693154039	1.89189332848795e-10	6.35250482373043e-07
HHIP	688.016050045135	5.06440066718605	0.801137467231627	6.32151269205565	2.59015098933952e-10	7.73073731951535e-07
RYR3	180.047635723123	2.68963382632697	0.428079922872139	6.28301791936718	3.3206276979259e-10	8.91987012216855e-07
ESRP1	29.606924690405	4.98176181440008	0.808550255737103	6.16135086106494	7.2126981154827e-10	1.57798010006939e-06
SCUBE3	2989.31445023479	4.30468509422801	0.699788377126165	6.15140981893147	7.67971897826317e-10	1.57798010006939e-06
COL4A6	149.546887155806	3.88276085279437	0.631666856072927	6.14684911114934	7.90372495170362e-10	1.57798010006939e-06
AGXT	14.5692708119132	5.0917008504069	0.829194343429319	6.1405397790692	8.2241536002425e-10	1.57798010006939e-06
NOS1	60.3305790048458	5.29694605811541	0.865003013480894	6.12361572799586	9.147535880293e-10	1.63814072544287e-06
CYTL1	1523.79408884344	3.44951205950874	0.565831831661465	6.09635560689447	1.08513875770869e-09	1.82181233184818e-06
SHISA9	62.6850367040572	-5.88423951800982	0.973201937417454	-6.04626778037925	1.48239638027558e-09	2.30673849905455e-06
LGALS12	314.955297387723	3.3394861400398	0.552938926820947	6.03952078259304	1.5457260435925e-09	2.30673849905455e-06
MEGF10	209.036101121557	3.26320490261121	0.542150446808663	6.01900251456007	1.75495144061379e-09	2.48113187356672e-06
OGDHL	190.970545430192	3.76859368742589	0.627426101761983	6.00643434635992	1.89647718731783e-09	2.54715851028657e-06
COLEC10	28.0135220775075	4.00272978682591	0.668336789806318	5.98909090128929	2.11017205502055e-09	2.699211511522e-06
RASGRF1	155.836341241215	3.08685028080862	0.51839123354404	5.95467299804632	2.60592344598378e-09	3.1818325275462e-06
TNNI1	26.9237058530507	5.12218512497243	0.86766577740972	5.90340803836232	3.56068142103514e-09	4.15856627529764e-06
TUSC5	70.6753491221847	4.66324512270781	0.79213801186214	5.88690992336747	3.93483025629658e-09	4.40405876435995e-06
PCP4	27.8596477533694	4.71233811972959	0.802722508748166	5.87044472825162	4.34627665149757e-09	4.66998733650111e-06
TYRP1	25.9549774219411	3.53035213822867	0.602516320754634	5.85934690334531	4.64691063755925e-09	4.80097359792756e-06
LDB3	201.044272277512	2.44313225293156	0.417842211784328	5.84702115781591	5.0045387208976e-09	4.97895996743524e-06
PLIN1	463.613739248332	3.70412174311006	0.639198602877254	5.79494655719916	6.83429407745112e-09	6.556528839589e-06
MYBPC1	76.0002509804365	5.30034318732956	0.91711890829355	5.77934130394467	7.49936541378488e-09	6.94648116362377e-06
KCNQ2	195.319112005001	5.58135075595639	0.96838900937073	5.76354202902737	8.23667295457323e-09	7.37511696352487e-06
ASB5	40.9634566759923	6.89781291516329	1.19809664436449	5.75730926850408	8.54652474392879e-09	7.40570153778759e-06
SYT4	576.433543686439	4.81797898031291	0.841893539707762	5.72278887183922	1.04789457086735e-08	8.79641998832463e-06
HPD	119.477312874545	3.06335455622075	0.536884258478492	5.70580065972164	1.15797456807144e-08	9.42591298410149e-06
SLC6A20	21.0774288559036	4.12505446127943	0.72911552479049	5.65761435742952	1.53491542771162e-08	1.21267347703499e-05
EEF1A2	114.889473659818	2.84607651466293	0.507487965025243	5.60816553456863	2.0448240446372e-08	1.56937324248699e-05
TRPA1	58.6657288041173	2.92348375185932	0.525032514555396	5.56819562753169	2.57390757184398e-08	1.92056403319092e-05
USH1C	61.4208375768316	4.23443182001297	0.766219917482739	5.52639225814482	3.26882844966355e-08	2.37316945445574e-05
PPBP	28.3665105199754	-4.32663746891911	0.785544551825568	-5.50781933228894	3.63305978860456e-08	2.56819084319725e-05
NUDT10	108.559361736984	3.10737268736606	0.565711187081254	5.49286059446399	3.95474963229869e-08	2.72390986212327e-05
ACVR1C	33.7403751258923	2.7534971870111	0.504786274569638	5.45477824126385	4.90339998677451e-08	3.26955585725406e-05
IGFALS	88.6806917203468	3.32004350465934	0.609168904587207	5.45011979380188	5.0335903164341e-08	3.26955585725406e-05
PROM1	205.30379146039	4.42263010199828	0.81188406559404	5.44736655074309	5.11210431109637e-08	3.26955585725406e-05
MUM1L1	112.187179878759	3.62905336212185	0.669997685631839	5.41651626557408	6.07714645531151e-08	3.79637925773437e-05
MISP	53.660580069482	3.11007787184478	0.577331201679409	5.38699079973127	7.1647100157141e-08	4.37405546459346e-05
PCOLCE2	2654.52516217764	-2.56756950825089	0.47935882647364	-5.35625791463773	8.49632057384766e-08	5.07173696121546e-05
GRK1	8.73281639111625	3.90654649821761	0.731151614076695	5.34300468330475	9.14184005637976e-08	5.33843712161898e-05
DRD2	84.6396929563087	3.37386093050482	0.633062672535698	5.32942641680484	9.85234273038515e-08	5.63092830688523e-05
DMRTA2	114.899131183639	4.36710885247705	0.820085213287546	5.32518911659222	1.00848059874159e-07	5.64370955070765e-05
C12orf50	17.0893285957563	-3.6216872442466	0.681341052985477	-5.31552770580491	1.06348665908431e-07	5.83007727271895e-05
TOX3	58.2043961873663	4.96504983899411	0.935239964316896	5.30885123436807	1.10318327684822e-07	5.92674183653938e-05
HERC2P3	169.286854228593	2.53077960201127	0.4776113184767	5.29882669046239	1.16549194191132e-07	6.13871461639644e-05
CHRNA1	199.519378009132	3.36050609083531	0.640587257456231	5.24597711197045	1.55456201946352e-07	8.03050864746711e-05
NPY	48.3092647912059	5.37159043987465	1.02641101509722	5.23337177881498	1.6644548120006e-07	8.30259875495729e-05
IGFN1	72.9673745095039	2.98434736658044	0.57050083974553	5.2311007428343	1.6850364213817e-07	8.30259875495729e-05
IRX4	48.2398163824591	4.42282026347218	0.845749095783081	5.22947087442888	1.6999587950363e-07	8.30259875495729e-05
BMP3	16.6849177736243	4.23625630268149	0.814715256654767	5.19967714864654	1.99634980573051e-07	9.23166526949456e-05
RP11.513G11.2	24.8047654418798	4.54721797278858	0.8745272422646	5.19962987203634	1.99685762299182e-07	9.23166526949456e-05
RIC3	98.6321116462319	3.31908269880882	0.638552284730567	5.19782448231202	2.01634373844432e-07	9.23166526949456e-05
GPD1	144.741799329765	3.25916450696255	0.627150229865798	5.19678436163528	2.02765337986814e-07	9.23166526949456e-05
ANGPTL7	240.560001570915	-3.97931622173979	0.766400578042905	-5.19221453603472	2.07807346888296e-07	9.30353492018902e-05
RASSF10	13.8807640201788	5.05902941574312	0.978525704683744	5.17005265321894	2.3402804714611e-07	0.000103056744302276
FAM151A	36.4365005047374	2.75304831652748	0.535137386727749	5.14456359209322	2.68143412553558e-07	0.000116175295935705
SLC8A3	129.238605849051	3.65624758108566	0.712689145264946	5.13021364977634	2.89413506914513e-07	0.000123400406710121
PRG4	2362.21786762565	-3.14578724461997	0.61774723286151	-5.09235343725969	3.53646068551232e-07	0.000148431885834737
RND2	883.606199518514	-2.73192375499379	0.539779964076629	-5.06118036386758	4.16668810532263e-07	0.000172193193669502
RP11.157P1.4	69.8349694409467	1.88659815137691	0.374756981362733	5.03419080951249	4.7987151358572e-07	0.000195307706029388
PLG	7.17219584833116	4.22658639627251	0.84046518646095	5.02886551918934	4.93390259846265e-07	0.000197812674029707
RP11.615I2.2	29.6284610632213	3.71839442334319	0.742817304668118	5.00579940716988	5.5630667067278e-07	0.00021975749687665
ALDH1A2	865.480149498715	3.47783475235941	0.695641175700929	4.99946649773159	5.74891597818007e-07	0.000222064675037312
IGF2BP1	150.595362963883	3.81555538167329	0.763385968853558	4.99819951813292	5.78680934130439e-07	0.000222064675037312
NFIA.AS2	88.3780280505615	-2.16477017567799	0.433439741192862	-4.99439707517444	5.90198565812271e-07	0.000222248571064588
NKAIN4	83.5998564021667	3.14997967164124	0.631022803728228	4.9918634525257	5.97995267984491e-07	0.000222248571064588
C20orf166.AS1	20.0131373689776	3.91652484077328	0.784884195475771	4.98993974314798	6.03981300264871e-07	0.000222248571064588
CDC42BPG	90.7481316515382	1.89189452266216	0.381912286824237	4.95374091887451	7.2800123394368e-07	0.000262135433675638
RBM20	359.634201416975	3.00954644049512	0.607704557707022	4.95231836313795	7.33344969472205e-07	0.000262135433675638
KRT80	297.854050424999	3.35675614204665	0.67811525230873	4.95012629581498	7.41653375003666e-07	0.000262135433675638
LINC00887	32.6366926875052	2.87548991578883	0.581826885490612	4.94217436061612	7.72560749495156e-07	0.000267799513823765
TMTC3	2693.97736515706	-1.61097862980338	0.326049461727545	-4.94090258964929	7.776175295307e-07	0.000267799513823765
DRD1	32.547476245492	4.21013079870297	0.858771365842866	4.90250486469215	9.46222710826033e-07	0.000321739676686189
PPFIA4	222.520305605874	2.76209378019543	0.56619946854528	4.87830514446084	1.07001298807837e-06	0.000359283611072015
MYH14	414.965205588743	3.16677465880788	0.649942355749799	4.87239311423943	1.10254508154647e-06	0.000365636617043225
TUBB4A	299.620186295382	3.26056066252532	0.671228482118636	4.85760176957007	1.18816072121396e-06	0.00038922406455182
RBM24	238.841525573862	2.75996130284595	0.571075449579217	4.8329188461517	1.34545644354981e-06	0.00043544157815223
CDH12	46.0702624638894	3.69626310979	0.768311270900725	4.81089273291112	1.50257645805875e-06	0.000480502485909215
RBFOX3	42.8126812302317	3.17685567482927	0.664467356134978	4.78105605263765	1.74376729095769e-06	0.000551071493761239
CSMD1	153.291272553955	3.72767660638714	0.780387336584568	4.77670053271447	1.78194842754481e-06	0.000556589519310567
LINC01479	29.6409921964857	-3.55654728386489	0.745885889367344	-4.76821901924104	1.85861664350251e-06	0.000573863911238672
CHRNG	12.0610598546111	3.47246552195156	0.730117073876002	4.75603933423601	1.9742801818157e-06	0.000600312372813614
RP1.302G2.5	34.468159524083	2.53559974821784	0.533300587217319	4.75454145184466	1.988973314735e-06	0.000600312372813614
MYH7	19.6957487871742	3.69706316602413	0.78078394696197	4.73506554586502	2.1898431620234e-06	0.000653595189091916
PCDH8	52.2049385973106	3.61411566471184	0.766414274600892	4.71561632459661	2.4098016641869e-06	0.000711341673663609
SORBS1	1446.64761084666	2.13279667412402	0.453082976556868	4.70729818703821	2.51021589708105e-06	0.00073292847203686
PAPPA2	628.303941446467	2.76457823111876	0.588167594009867	4.70032395404699	2.59749098692083e-06	0.000750255945060938
JSRP1	123.861404688862	2.56745863020528	0.548001147861382	4.6851336721191	2.7977727769343e-06	0.000799508216319246
RP11.96H19.1	58.7103020799244	1.34704998647892	0.287900401278554	4.67887498765796	2.88453237832777e-06	0.000805864290473841
RP11.576I22.2	96.0942743776132	-1.90572318337049	0.407309812776111	-4.67880498724449	2.88551718814563e-06	0.000805864290473841
CXCR2P1	253.424143421092	-3.13653323395743	0.670619121699017	-4.67707098182796	2.91001549311156e-06	0.000805864290473841
OLFM4	123.72131533173	3.40712267952208	0.729498812991016	4.67049790739555	3.0047054445424e-06	0.000823595894400999
STK31	12.3444279796195	2.23849389718839	0.479630815181576	4.667118596917	3.05453037856398e-06	0.000828795909383692
PRR15	98.6279771274489	2.66665197208757	0.572795681436455	4.65550292802514	3.23190813419045e-06	0.000868155163006238
ALDH1L1	153.048595345798	2.45406127599823	0.529901849665614	4.63116193602047	3.63619331360608e-06	0.000957857490544054
MAPK15	33.6785722801641	3.40596307647145	0.735453371545695	4.63110675434551	3.63716268466583e-06	0.000957857490544054
RP11.276H19.2	32.2145401787681	3.12070045022561	0.675413443474128	4.62042987207012	3.82945769672813e-06	0.000998707695626322
PDZRN4	198.755733127458	2.91878949151286	0.632781554727216	4.61263364854418	3.97598728162753e-06	0.00102695163806807
BAI1	118.246209616701	2.83859347196842	0.617054518811609	4.60023123635055	4.22022203119307e-06	0.00107965337335151
RP1.197B17.7	21.6166202806285	1.64399903805529	0.357719306195429	4.59577945495942	4.31134533596857e-06	0.00109255998504517
NXPH4	842.966946121964	2.46728296648209	0.537608771652656	4.58936516027716	4.44596082588509e-06	0.00111614392247594
CHD5	381.412655186571	3.65783759045857	0.797758100622507	4.58514628382248	4.53668695417659e-06	0.00112837486076937
LCMT1.AS2	23.5051094409643	3.83600762419061	0.840970198809058	4.56140732409184	5.08119023638228e-06	0.00125221038651102
SHMT2	8905.88188418638	1.26089109749587	0.278526838148532	4.52700036333111	5.98268372646802e-06	0.00145165908307087
NMUR1	146.559818646101	2.10599755088979	0.465362239021099	4.52550158629072	6.02524294804746e-06	0.00145165908307087
HOGA1	53.2816093928308	2.40672008764987	0.531925637791159	4.52454237333598	6.05263261499281e-06	0.00145165908307087
BLACAT1	10.8744066938391	2.91549935609098	0.651822093845098	4.47284524967917	7.71856371902055e-06	0.00183483237717106
NAT8L	179.223198981285	2.05229504100692	0.459155044693193	4.46972120795985	7.8321619187564e-06	0.00184550467948802
MYBPH	21.0330110018915	3.29922765401722	0.739589564429615	4.46088994855091	8.161999853896e-06	0.00189250130339481
TTN	564.063013129193	1.38657171361589	0.310847724546534	4.46061400526133	8.17251698286792e-06	0.00189250130339481
NRAP	12.6198946070384	3.5965405492506	0.808812957807969	4.44669007158081	8.72035098148849e-06	0.00199405419176366
PKLR	2.11106782901508	2.33867935839397	0.526051089000756	4.44572667425959	8.75952626863642e-06	0.00199405419176366
PTGER1	30.0643823680418	2.40641066429311	0.541602064355476	4.44313421729074	8.86578208258149e-06	0.00200128267480928
PDE6A	17.8547960955324	1.94751687952827	0.441013597122487	4.41600189253885	1.00543204007185e-05	0.00223535636909092
GAD1	23.5286490566925	2.30541498369572	0.522097075302388	4.41568262446304	1.00691728337429e-05	0.00223535636909092
HEPACAM	6.17036447251496	3.30434554612421	0.7499323784016	4.40619133310001	1.05204043937837e-05	0.0023163860887362
LAMA5	4463.39908879107	1.4671567719517	0.333357131930018	4.40115609183877	1.07675626868149e-05	0.00233879297708265
GFAP	21.1197030562373	2.60933950654089	0.592953849911786	4.40057772949629	1.07963044136047e-05	0.00233879297708265
PLEKHH1	163.565800647586	1.91132258863117	0.435833888972832	4.38543820705578	1.1575251525977e-05	0.00248747525192636
TRIM72	12.323130581544	2.40446093616361	0.549685262638253	4.37425032030736	1.21850495534026e-05	0.00259773651669445
LHX4	59.3230421013594	2.30699451939811	0.527659009007185	4.37213139549882	1.23039435427758e-05	0.00260242938146492
FOXB1	13.2997142130172	3.88854364629417	0.89013197147369	4.36850239168059	1.25101447533448e-05	0.00261379193436714
CNGA3	55.0210158230201	-2.74900302303372	0.629383939455504	-4.3677679881885	1.25522730821741e-05	0.00261379193436714
SYTL5	26.109346216494	3.02538087231808	0.693192085439702	4.3644192365512	1.27460928237632e-05	0.00263373496486098
GDF11	3239.47600573541	1.39623074352676	0.32072611896541	4.35334280859535	1.34077242056446e-05	0.00273214058987178
PGM5	1486.48466450841	1.77562468738836	0.407944917943088	4.35260891676576	1.34527000946012e-05	0.00273214058987178
PMEL	80.0882265791477	1.59592421732882	0.366868035688717	4.35013155161587	1.36055884405394e-05	0.00273214058987178
EPYC	114.80533493952	2.82351195997042	0.649120251869332	4.34975176300429	1.36291727735395e-05	0.00273214058987178
KITLG	2358.36323392362	-1.51171410936534	0.348087482170449	-4.34291431550272	1.40604983059277e-05	0.00279772670736171
SLC7A10	73.5597204093845	2.92976579171815	0.675203435584957	4.33908602550278	1.43076511853475e-05	0.00282597151574122
HS3ST5	61.816337187114	-2.48276244512915	0.572647565206718	-4.33558543854614	1.45372694773601e-05	0.00285036593212297
KCNIP2	95.1369419340246	1.8364103014614	0.423916524352835	4.33200924230289	1.47754737801775e-05	0.00287607809190672
RP11.644F5.10	196.417360703914	1.50432050760295	0.347617564357977	4.32751581578252	1.50800519934018e-05	0.00291107286878027
GNAL	553.187527141213	1.5829300871142	0.365895876996426	4.32617634313944	1.51719976781043e-05	0.00291107286878027
CDH3	339.39900659245	2.34153520210566	0.541972352136698	4.32039603657691	1.55749421693964e-05	0.0029576295591044
COL23A1	300.225596148417	1.81661685653486	0.420557084347102	4.31954881786165	1.56348521105214e-05	0.0029576295591044
FLRT1	200.07968912335	2.57978750232467	0.600723045817827	4.29447067210903	1.75110626625461e-05	0.00328938577091828
INHBE	489.091991694301	2.7878378251443	0.649430419443151	4.29274290467439	1.76479313283356e-05	0.0032920745232066
MROH9	6.79945837515803	-3.708126120663	0.865926749277648	-4.28226304794984	1.85002094187317e-05	0.00342725948555842
CTB.52I2.4	21.4282424823428	1.53737720597509	0.35971620149585	4.2738614485031	1.92116442995406e-05	0.00352848628157853
YBX2	32.3616164382305	2.49876490054039	0.584816814759886	4.2727309432208	1.93093397137981e-05	0.00352848628157853
CHRNB2	11.1487572591764	1.90426790404611	0.445984797300552	4.26980452152681	1.95644361741259e-05	0.00354867175313111
FBXW10	9.44759360614057	2.76701672927376	0.648249328907925	4.26844518903741	1.96840179888517e-05	0.00354867175313111
HMGCS2	10.2149772613142	3.45205393878815	0.810211693738071	4.26068145580746	2.03804537149928e-05	0.00364973165128091
MROH7.TTC4	6.10299501711717	2.61303974249655	0.61389094448054	4.25652107428893	2.07632473291209e-05	0.00369365794539633
ACKR4	356.801179291931	-2.47034483156211	0.581403061789681	-4.24893674270972	2.14787555262063e-05	0.00379580480884837
HHATL	22.458606825641	2.7646733035415	0.651024089038844	4.24665285062369	2.16987766667672e-05	0.00380962443674967
TMLHE	348.688818891213	0.84408513113702	0.199051016725977	4.24054669511701	2.22976041051404e-05	0.0038893392303395
FAM132B	967.096791749825	-2.1837899786674	0.515362589804938	-4.237385525973	2.26137650392104e-05	0.00390539119408834
POU6F2	35.9797956952487	3.57642171586848	0.844147793053408	4.23672459408089	2.2680404522291e-05	0.00390539119408834
MROH7	31.8853945121625	2.08205760289588	0.491746468073267	4.23400621676792	2.29564593474972e-05	0.00392774784071636
ENSG00000224958	28.897119676318	2.57945700587182	0.609834462102377	4.22976588922059	2.33934634610952e-05	0.00397718490817683
PCP4L1	7.97327603788599	2.74613933034419	0.652059377966613	4.21148659637068	2.53695609506035e-05	0.00428601978776799
SLCO4A1.AS1	2.91020824457404	2.50532960869172	0.595219796332362	4.20908313891626	2.56409035439539e-05	0.00430478719373557
C19orf67	3.55517872243113	2.08087676431011	0.49542494156333	4.20018571883731	2.66696128924387e-05	0.00444968410879931
TRIM54	9.49983224100135	2.97747444231549	0.70952093777584	4.19645747403746	2.71122340726939e-05	0.00449466030153377
RDH5	156.3325157159	1.8037877368455	0.429973807276228	4.19511074005187	2.72738302862782e-05	0.00449466030153377
RAMP1	303.231535200141	2.1075144924796	0.502972964902664	4.19011485614829	2.78813288204298e-05	0.00456675765106333
CAMSAP3	43.393753630009	2.52253997699058	0.602705883209528	4.18535814443616	2.84716831472965e-05	0.00463519001637986
NPY5R	14.6413920070291	3.99245271718555	0.955668439676764	4.17765466706834	2.9453037773571e-05	0.00476606928116666
CRABP1	667.03811965365	3.93246905211884	0.94236689098409	4.17297030460425	3.00654140223541e-05	0.00483603084711662
CSRP3	6.38611821402878	4.61673983113106	1.10758545593261	4.16829221294141	3.06890344339183e-05	0.00490695739859472
POLR3G	175.345576924842	-1.24168716331222	0.298141942373843	-4.16475170660575	3.1169158662047e-05	0.00495423633124206
ANKRD1	57.2813571915008	3.03207132389458	0.728274918651673	4.16336090429718	3.13597094658756e-05	0.00495520303336676
TSPAN19	7.9801533778115	3.68934052309062	0.888059164925354	4.15438595625633	3.26162240187723e-05	0.0051236082432296
LINC01012	13.7127342819521	2.50157335276929	0.602981017062738	4.14867679409717	3.34402541987998e-05	0.00522251225748931
PLEKHG4B	366.694150748493	2.7933336385327	0.674121046079568	4.14366775043987	3.41794840377869e-05	0.00530710578163602
ACOT11	191.906709901568	1.43809587091774	0.347819211950358	4.1346073520602	3.5556201977631e-05	0.00543848541093923
CLDN16	5.35573798948524	2.09802921149733	0.507460005256519	4.13437352651424	3.55924191606024e-05	0.00543848541093923
HAPLN1	253.428015516829	3.16528207881398	0.765667219224342	4.1340180163656	3.56475511693856e-05	0.00543848541093923
MAL2	74.6713020619757	2.62237544042589	0.634525967960802	4.13281027544626	3.58354522275424e-05	0.00543848541093923
CDH1	67.7918108099546	2.07846737185063	0.503710624159133	4.12631235507551	3.68626515794163e-05	0.00554984850035177
RP11.900F13.3	9.67368697620654	-1.82865641896139	0.443249862048167	-4.12556568097177	3.69824615279192e-05	0.00554984850035177
KLHL30	34.9880512919702	2.02859038879492	0.492749059942208	4.11688332603383	3.84030358278269e-05	0.00573101304670604
FUT9	3.60640755111382	3.71746007765405	0.903744124650072	4.11339888831194	3.89875849327212e-05	0.0057861022456506
PROKR1	8.49558255213796	2.53995020675959	0.619275044825494	4.10148968214169	4.10498814283858e-05	0.00605869184027087
SFRP5	69.0855456353584	4.74747017870004	1.15963373067482	4.09393936474869	4.241052646421e-05	0.00622530908132027
FAR2P2	18.1128977362463	1.79768288604275	0.439312771634157	4.09203420004323	4.27605567395201e-05	0.00624257649530972
AHRR	290.208478204502	1.90679586456333	0.466816316250057	4.08468127224141	4.41373587303086e-05	0.00640874448764081
CCDC144CP	14.0708883801942	2.6075180471766	0.638678486298451	4.08267712646597	4.4519856128103e-05	0.00642952889953281
KCNB1	592.271140650946	1.98517584597304	0.486500675625483	4.08052022419237	4.49350192165812e-05	0.00645478334864067
FAM126A	2365.86370618561	-0.677882656423087	0.166214141991914	-4.07836931502535	4.53526835281661e-05	0.00648012651560424
RP11.180N14.1	152.624204531393	-1.83124546347087	0.449315096877386	-4.07563751184306	4.58884549101011e-05	0.0064898771662229
LY86.AS1	9.12798502476427	1.73060864885522	0.424631087093852	4.0755580584064	4.59041270784882e-05	0.0064898771662229
SLC4A10	23.4969217536979	2.20927802658363	0.542664000772809	4.07117115459546	4.67773630296507e-05	0.00656256541664277
RP11.66N11.8	133.432048320949	1.44329710882528	0.354664395000603	4.06947280068195	4.71196399339826e-05	0.00656256541664277
DCX	61.4184052820228	3.17609807580384	0.780499081273076	4.0693168666173	4.7151184774479e-05	0.00656256541664277
ITIH2	21.7018592597384	1.83557026242127	0.452100221096453	4.06009591848808	4.90525606190382e-05	0.0067920097079825
PRDM13	2.53126026447553	3.25270790767398	0.80154642651909	4.05804055767506	4.94861751055305e-05	0.00681691095222955
AKR1C1	1910.61600855951	-1.76376051357097	0.434881777340901	-4.05572411968039	4.99792229245003e-05	0.00682100893550072
TTLL2	2.24613760936665	3.16216557768896	0.779719693422512	4.0555158531509	5.00237793274381e-05	0.00682100893550072
RP1.197B17.3	91.7050314978964	1.48785679153604	0.367051918982079	4.05353225141067	5.04500409708585e-05	0.00684438889171314
TENM2	816.692205252783	3.09890899890697	0.765016080808453	4.05077628646983	5.10479954371343e-05	0.0068563444635446
RP11.693J15.5	28.3937113999602	3.02617790891932	0.747061783554254	4.05077327677216	5.10486520999524e-05	0.0068563444635446
AC104809.4	12.3252943315822	2.16949974870454	0.536310558369969	4.04523035179168	5.2271700725708e-05	0.0069758910191724
CHI3L2	295.629380742396	-1.94353401865455	0.480651197868207	-4.04354348283026	5.26493864311564e-05	0.0069758910191724
MAFA	9.96213796172636	2.25260298432124	0.557252727991484	4.04233639634271	5.29212357815236e-05	0.0069758910191724
CFAP57	24.1318128842117	1.82180506714141	0.450708988520606	4.04208727480951	5.29775060647446e-05	0.0069758910191724
ANGPTL6	63.8327395116684	1.70050480270118	0.422232420548339	4.0274140969393	5.63936610098961e-05	0.00738949522950161
MKRN9P	5.14036437097335	-2.88882600900797	0.718209429439914	-4.02226132182751	5.76420536974718e-05	0.00751641187583247
MYH11	2043.99013786824	1.84832926427939	0.460925832134934	4.01003618243357	6.07094441257784e-05	0.00787815018409014
SARNP	236.107210304396	1.46534431433908	0.365779460968701	4.00608692040386	6.17329396465639e-05	0.00797245300377885
RP11.531A24.5	70.048842203192	1.78410899789445	0.446198195504602	3.99846753274477	6.37539241326872e-05	0.00818685125422678
CD63	103541.091156141	1.38808012122193	0.347233082929598	3.99754571053752	6.40026343305645e-05	0.00818685125422678
CFAP221	57.4289062858294	2.02200484003949	0.506747683779294	3.99016099088899	6.6028462435435e-05	0.00840595525090358
NPY1R	245.705750379966	1.95478975036153	0.490643769395802	3.98413242415925	6.77270997405446e-05	0.00856734325579007
PRDM16	80.4933313603004	1.60984263269638	0.404137039737047	3.98340779094099	6.79340374314379e-05	0.00856734325579007
KRT8P39	15.4753003434587	2.54560623918192	0.639636848867949	3.979767963161	6.89825656470078e-05	0.0086589237308875
TFAP2A	195.939898732469	2.09186382185859	0.526390327916517	3.97397845461619	7.06819597300228e-05	0.00879493911892089
RASSF6	23.4190271675937	2.99862299549861	0.754603535519705	3.97377278842647	7.07430513461366e-05	0.00879493911892089
DPYSL5	36.9962214626041	2.5385413748753	0.639066909548346	3.97226227324052	7.11932717441094e-05	0.00879493911892089
C14orf39	37.027466851098	2.79246096657483	0.703098017331854	3.97165245490491	7.1375799565362e-05	0.00879493911892089
NPFFR2	73.4655006405865	-2.97072852237495	0.748314379135377	-3.96989367731703	7.19047108705375e-05	0.00881965453609305
RP11.320G24.1	24.3670792374202	2.5077638844003	0.631911724794391	3.96853513869563	7.23157952147607e-05	0.00882975859572228
SMARCA4	7669.90008201771	0.852925899785495	0.215136716573967	3.96457616983407	7.35264668449427e-05	0.00891107381361925
PTPRN	163.685940535582	2.87111810627883	0.72426329311757	3.96419110779478	7.36452381290847e-05	0.00891107381361925
RP11.757O6.1	9.630277234604	2.25413113770185	0.569586635215054	3.95748600535681	7.5742723531777e-05	0.00912377147762598
CPA1	59.1366717342692	2.13377885462845	0.53938060878454	3.95597991451118	7.62215652891219e-05	0.00914046288748389
KCNAB1	1240.17410832608	-1.84399127635797	0.466321695337412	-3.95433301687526	7.67484505605381e-05	0.00916274168425411
CELF3	12.9516546154552	2.53143276530386	0.640818205305932	3.95031343420608	7.80489162373416e-05	0.00926676432898586
SYT9	11.5913779033921	3.01764143054556	0.764053675349766	3.94951497244504	7.83097127049285e-05	0.00926676432898586
ZKSCAN3	251.919152368422	0.626470298595002	0.159056522739236	3.93866461938229	8.19363678946282e-05	0.00965339787011185
AC006277.2	21.0789565889502	1.26855457825408	0.32265884674899	3.93156608298715	8.43942905546395e-05	0.00989956084226518
NNAT	35.7308827765165	2.38639398153509	0.607546391000947	3.92792059484289	8.56834892346079e-05	0.0100070864687828
KRT87P	2.86211426738382	2.98346177936909	0.760230374280378	3.92441801893694	8.69396590377067e-05	0.0101098403509562
SGSM1	61.4736292093572	1.54131066953678	0.393399459285078	3.91792777839041	8.93134548935756e-05	0.0103411121782381
CLIC5	1409.78422108373	2.03975488744967	0.521037064825271	3.91479805401886	9.0479905505435e-05	0.01043120696003
SH2D7	11.3454243239837	1.83258124918073	0.468456260253177	3.91195807307669	9.15508084268515e-05	0.0104557574914099
CLDN1	694.581988423472	2.33083204475802	0.595911130781526	3.91137524432742	9.17720575912218e-05	0.0104557574914099
CDR2L	1943.23444968044	-0.825679958233339	0.211109662056934	-3.91114243748191	9.18605750864694e-05	0.0104557574914099
SERPINE1	16178.7174868797	-1.96863610091772	0.503775382122046	-3.90776558518057	9.31536194160007e-05	0.010558196306973
AP001065.15	19.2434600440217	2.40631494618293	0.616790344225903	3.90134989743226	9.56577684806278e-05	0.0107932794499459
KB.1980E6.3	12.6204245747681	1.88703260620219	0.483804096027424	3.90040642833919	9.60313375227854e-05	0.0107932794499459
NAP1L6	14.9506952140495	3.77140489147587	0.967694492453816	3.89730945136681	9.72672993192156e-05	0.010850637481336
C14orf180	32.773081853866	2.88453944772491	0.740174999087004	3.89710467292594	9.73495507781243e-05	0.010850637481336
SULT1C2	49.9281294482241	2.32315590279863	0.596431845071171	3.89509031416895	9.8162147275399e-05	0.0108959983475693
RP1.8B1.4	4.25687201604903	2.41757658871539	0.622072163877413	3.88632819325412	0.000101771895016211	0.0112501919503105
KLHL38	20.8987194767519	1.88850104140521	0.486268757804267	3.88365695121496	0.000102897058136232	0.011327953998588
TSPAN32	127.318389291924	1.48099088318085	0.382005137200722	3.87688734772872	0.000105801314305851	0.0116001424689133
FBN3	7.95889155938652	2.24380133295456	0.579192723335534	3.87401506019041	0.000107056792451103	0.0116706738485972
SPRY3	169.348637154444	1.0376693939109	0.267894081265675	3.87343157791463	0.000107313544806921	0.0116706738485972
PLEKHA7	201.18139547128	1.38290848845933	0.357679838166976	3.86633055848606	0.000110485162922215	0.0119671469613571
DNAJC14	1484.62200894549	1.22816531165262	0.318761840203707	3.85292452467885	0.000116715375771175	0.0125911984898204
VAMP4	2332.80107383593	-1.3258996216946	0.344288529332479	-3.85112923821574	0.000117574428337309	0.0126331371759872
RNF43	68.6473702104042	2.36657099705502	0.614888099978067	3.84878321297717	0.000118706000697718	0.012675703125416
SBSPON	857.241252877052	2.23953135957851	0.581984864980524	3.84809209712603	0.000119041303991134	0.012675703125416
AFF2	284.346794256987	1.98960409415652	0.517131791240551	3.84738306145063	0.00011938622927296	0.012675703125416
CR2	118.22293336806	2.59109242143997	0.673818156502215	3.84538824968788	0.000120361709488215	0.0127289615758758
PPP1R1A	127.451765018892	2.45171927019625	0.637979597283932	3.8429430668848	0.000121567677339545	0.012765122703929
PRSS16	61.2083060256537	2.72342863445573	0.708715194622651	3.84276879502463	0.000121654061953906	0.012765122703929
RAB37	433.880984021459	1.78606098396032	0.465086284627754	3.84027876760513	0.000122894678811221	0.0128393451600551
HP09025	5.28239588701095	2.54273595886937	0.662425435460576	3.83852404022112	0.000123776097632595	0.0128393451600551
GVINP2	12.8252948822964	-2.50784283721827	0.65334168855493	-3.83848586604836	0.000123795339008795	0.0128393451600551
ELAVL3	9.7979187144785	2.4511728582731	0.639125785156042	3.83519631847531	0.00012546403982435	0.0129623655298526
CLDN4	238.757448550238	1.53268843375208	0.400004244087543	3.83168042941224	0.000127270986541211	0.0130986714194253
C16orf96	17.2819240673323	1.276455876941	0.333773119156398	3.82432198305006	0.000131132452645131	0.013444579934937
HOOK2	661.866904125475	0.82482859078802	0.216085342682195	3.81714271106822	0.000135006087392973	0.013789100834791
LINC01122	13.4844719524315	2.94262213535982	0.772614897379488	3.8086531146894	0.000139725813610455	0.0141882075176658
MACROD2	188.271280301618	1.67203958310505	0.439060519052695	3.80822121449817	0.000139970031724423	0.0141882075176658
HIST1H2BH	35.3802620934683	1.85419219339116	0.487267083659903	3.80528924602124	0.000141638573571858	0.0142924686927595
PNMA6A	198.520987090377	1.80665015774692	0.474865775523123	3.80454909759852	0.000142062733265088	0.0142924686927595
CTD.3088G3.8	78.5080396081936	1.24512627001677	0.327451963919235	3.80247000236002	0.000143260617329844	0.0143406319296902
R3HDM2	3061.15302380862	0.992941126593793	0.261171903995451	3.801868085363	0.000143609187293822	0.0143406319296902
RP11.511H23.2	27.5033635878356	1.5114352409237	0.39767948743819	3.80063666511996	0.000144324792350081	0.0143587132300291
KRT86	64.1777203755057	1.7200622867027	0.453101149658605	3.79619934312395	0.000146931365309435	0.0145640971769079
LAGE3	1329.35741475107	1.07475530204529	0.283457362596597	3.79159423554941	0.00014968333076364	0.0147823295256356
PCLO	193.207076481568	2.79947052036033	0.739733955705458	3.78442884603097	0.000154061975216056	0.0151371659394692
IGLL5	5425.53556261651	3.43726542540745	0.908485105087092	3.78351324216586	0.000154630093571762	0.0151371659394692
TPBGL	268.027024831388	-1.33133107162102	0.3519272924305	-3.78297193839814	0.000154966891272208	0.0151371659394692
NRBF2	1715.10362558701	-0.595967699518528	0.157749816933086	-3.77792957928645	0.000158137577651131	0.0153909116335676
RND3	5102.08544252126	-1.0240688140569	0.27136195836879	-3.77381126010726	0.000160772410370239	0.0155908609652179
CNTN5	46.6795628066466	3.19202331012151	0.846223825973225	3.77207922082604	0.000161892834360608	0.0156430407071751
CHRND	19.2622192965038	3.42934100587181	0.909376221858027	3.77109157183043	0.000162535011144414	0.0156488009654525
FAT2	57.7627471227366	1.47836668720037	0.392264971091822	3.76879608466062	0.000164036825110969	0.0157369899861816
PIGR	19.37270496889	2.19533733087097	0.582893984731788	3.76627206383187	0.00016570322263529	0.0158352912112172
ITGA3	1359.26388890124	1.34326857774905	0.35673393809685	3.76546337282988	0.00016624049294778	0.0158352912112172
SRCIN1	109.866820185751	1.58059807460373	0.41993223456789	3.76393604608648	0.000167259676875496	0.0158760757605286
TUBBP5	14.7637161541277	2.18491668564206	0.581070126029572	3.76016006978625	0.00016980466992009	0.0160608909978642
CGNL1	2647.8541267707	1.90203558179922	0.506783649112901	3.75315104409669	0.000174625561964854	0.0164589187561401
ATP1A2	152.011550988183	1.76494537583212	0.470398517972887	3.7520215485327	0.000175414382687915	0.0164754585586111
PKD1L2	40.9274772898911	2.45347593370044	0.654237819611684	3.75012856205207	0.000176743931403543	0.0165424929803553
GPT2	1075.12677774534	1.27213187365317	0.339435577744328	3.74778590419703	0.000178402430216903	0.0166397433350224
IGHV4.39	2739.4676588918	3.53585654288606	0.944899459800475	3.74204525805602	0.000182528631624081	0.0168954579429943
ANKRD18A	5.14292648322319	3.70787602700325	0.991208499908218	3.74076294477558	0.000183462498099414	0.0168954579429943
FGFR2	902.803378003901	1.80263399666807	0.481929288507624	3.74045329813889	0.0001836886758472	0.0168954579429943
CXorf22	4.6937249845026	3.36668614682327	0.900135904522458	3.74019759672777	0.000183875647522482	0.0168954579429943
SPINK6	42.3489697610218	3.04109847702605	0.813207676533527	3.73963326316519	0.00018428892775286	0.0168954579429943
RPL13AP23	10.3577455124342	2.06971472522934	0.553625288881679	3.73847576473639	0.000185139336191718	0.0169003651049824
GP1BA	121.404292979292	1.68137026827092	0.449970989039873	3.73661926929678	0.000186511001569794	0.0169003651049824
RP11.314O13.1	22.6487865010059	1.64499303849254	0.440261787911864	3.73639748817321	0.000186675501062502	0.0169003651049824
TMEM178A	93.2244641919505	1.61687236341584	0.432764282188266	3.7361502091627	0.000186859073642311	0.0169003651049824
RP11.644F5.11	802.727387072076	1.18995795527007	0.31869062421093	3.73389696736884	0.00018853964871501	0.0169951410865188
RP11.467C18.1	16.0458397966759	-2.00609622753453	0.537490583069286	-3.73233744129788	0.000189711125521993	0.0170435459992367
RP11.474P2.6	14.5556537909765	1.70365080890437	0.457345873453022	3.72508184241738	0.00019525186439723	0.017482851938128
MMP8	14.7910983312486	-3.40098076494233	0.913503186505901	-3.72300919710077	0.000196862347882386	0.0175684929861018
RP11.74M13.4	4.45582043271344	2.42689627259809	0.652592094491347	3.71885637764229	0.000200126794449968	0.0178006819619704
FOXF1	1630.04204394917	1.99435255083262	0.536644034761549	3.71634160010516	0.000202128261684352	0.017919370842789
ANK1	516.768235725379	-1.85381403216293	0.499034651288535	-3.71480021953642	0.000203364298431243	0.0179696440278291
CRISPLD1	3306.8842140199	1.91799986652249	0.516553698105282	3.7130696645048	0.000204760494340365	0.0180336931113799
PPAP2C	212.147269338107	1.56165649181422	0.420694900332015	3.71208800149884	0.000205556488399427	0.0180446352659654
SPATA4	3.43546062979103	2.22088458210799	0.599739008307563	3.70308509425663	0.000212993398987615	0.0186365755166297
KANK2	16314.7372405652	0.966124935086135	0.261049683660872	3.70092360020333	0.000214816151959327	0.0187350372530242
BEND4	42.8528865747583	2.57813082011418	0.697573496221384	3.69585546767387	0.000219147623512862	0.0190238990345126
RP11.21A7A.2	4.03058369102859	3.3181507115497	0.89791487882114	3.69539562136007	0.000219544661629771	0.0190238990345126
FOXP4.AS1	8.65021857874308	2.0137674229142	0.545346907392177	3.69263563360785	0.0002219419025372	0.0191697858069269
SNTG2	31.6284740310586	2.55628231210677	0.692626033057586	3.69071070115876	0.000223628362042936	0.019253541862812
CDCP1	656.125430488705	-1.8253617229345	0.495216604319177	-3.68598650976981	0.000227818419056305	0.0195516241938993
ODF2L	1239.25266663258	-0.558739796010273	0.151780330194607	-3.68123982398694	0.000232102557159267	0.0198558563388925
CARNS1	57.9685707963412	1.13320827961145	0.308248430375489	3.67628240063071	0.000236657537527678	0.0201812532478364
SLC34A2	8.36808090144574	2.43654172067887	0.663480870471679	3.67236167479357	0.00024031923750338	0.0204286561956196
NBPF3	303.741547642491	1.04698192234013	0.285173627695825	3.67138409957346	0.000241240471815074	0.0204422761952571
MIAT	580.881866771073	2.27851052999142	0.621009075140168	3.66904546359026	0.000243457785348309	0.0204993524265381
ACTG2	3296.89263520816	1.88049932415151	0.512630913892481	3.66832992936888	0.000244140009936246	0.0204993524265381
KIF26A	840.991261346451	1.51266215552323	0.412508634094506	3.66698301683711	0.000245429088697839	0.0204993524265381
ACTC1	220.007291319626	2.65108335612587	0.723036135937818	3.66659870005982	0.000245798072798885	0.0204993524265381
CKMT1B	4.5409379768918	2.65519824729525	0.724304023158748	3.66586152002264	0.00024650729916043	0.0204993524265381
CHRNA4	14.0740426759696	2.88714597509706	0.787819003686559	3.66473258652915	0.000247597145505265	0.0204993524265381
FCAR	24.1210620804821	-1.56223930972128	0.426372191891147	-3.66402720306892	0.00024828039886867	0.0204993524265381
LPPR3	39.3760279555425	2.35051390331388	0.641551087374489	3.66379848709044	0.000248502318711953	0.0204993524265381
TOB2P1	11.6574937862799	1.282012267276	0.349940952488319	3.66351025268698	0.000248782253408214	0.0204993524265381
IGLV1.44	1365.01314783648	3.29448596733269	0.900503926445979	3.65849150745521	0.000253704146197282	0.0208409809637657
GRIA1	181.270290933427	2.78851681575408	0.762680128540414	3.65620751269687	0.00025597416903892	0.0209633479534252
ZDHHC8P1	14.6604625314885	2.35255034009619	0.643591144974009	3.65534914280276	0.000256832201415498	0.0209696856973347
MYOD1	28.2515022504925	4.94380584713671	1.35283216105073	3.65441182540849	0.000257772230355104	0.0209826595509055
ENSG00000038210	897.484110924274	-0.605237453101687	0.165693784625113	-3.65274686960078	0.000259449962402435	0.0210077360840191
IGLV1.40	3728.0867553537	3.26877921646669	0.895036213468926	3.65211950899479	0.000260084788774731	0.0210077360840191
RP11.401P9.5	6.90767703078359	1.84433371331054	0.505076861296545	3.65159019277994	0.000260621536477728	0.0210077360840191
PDZK1IP1	17.3329208830457	2.1826487026334	0.597820114957486	3.65101248356058	0.000261208541883046	0.0210077360840191
P2RX1	219.774772522911	1.90531612317663	0.522209572787834	3.64856605941755	0.000263708098994275	0.0211454535975649
CXCL8	1008.97913468614	-2.25361654731929	0.618144815796155	-3.64577440387765	0.000266587773805606	0.021312740416566
GRM4	50.9377355611455	2.31836311364171	0.636978812653217	3.63962359122275	0.000273036866708038	0.0217635498917249
RP11.401P9.4	83.7482488528194	1.96033400426962	0.539079487550752	3.63644703525296	0.000276424447994274	0.0219683832012491
FGFBP2	30.6914589674959	1.64568259957469	0.452833325888454	3.63419056304188	0.00027885470680302	0.0220961508381791
SYNM	2072.88951037478	1.54489513873827	0.426051141172121	3.62607910047622	0.000287757241700064	0.0227345147839621
FAM163B	6.5392721965585	2.87246604797546	0.792413306875295	3.62495937795693	0.000289006875549288	0.0227662835513343
TOX	472.71536307681	1.59116735319525	0.439224011930454	3.62267842826224	0.000291568205726611	0.0229008922287375
LLGL2	249.948638721108	0.80310257909336	0.221878186726097	3.61956527112225	0.0002950983701944	0.0231105901462448
FAM178B	35.3894241854881	1.67310230535102	0.462504213949161	3.61748553827215	0.000297478946257381	0.0232293007394354
ALX4	312.373272913996	2.40755514896972	0.666056998770707	3.61463831686052	0.000300767209871977	0.0233960918886877
RTL1	43.3626412583128	2.25538545036838	0.624046429777062	3.61413084467787	0.000301356853305261	0.0233960918886877
DUSP4	758.009404085421	1.20580451492641	0.33374664748648	3.61293371486301	0.000302752117450443	0.0234366783255153
C2CD2	1790.67394796262	-0.839765896459166	0.232706686935386	-3.60868829133535	0.000307749111303874	0.0237550477811628
ZCCHC9	942.101321002633	-0.376959123043608	0.104560587321788	-3.60517411673966	0.000311943713155098	0.0239952377285459
RP11.557H15.3	10.0902053097279	1.99193216894521	0.552610073954262	3.6045889549058	0.000312647353324066	0.0239952377285459
GAP43	2614.06139179704	-2.13398947788922	0.592286245577158	-3.60296983734569	0.000314602047115194	0.024076467776662
RP11.80H18.4	5.23182670892597	-0.998059618466724	0.277259231384363	-3.59973449209747	0.000318542265245253	0.0243087566165284
CADM2	40.7740369569193	2.85770459365967	0.794276665703478	3.5978705116921	0.000320833269216206	0.0243454608039417
GPR179	9.42722809692596	1.60362690507252	0.445730173522692	3.59775263226795	0.000320978671191797	0.0243454608039417
NDST3	79.5336901755002	3.31322140605492	0.921072437854263	3.59713445966685	0.000321742185444096	0.0243454608039417
TM4SF1.AS1	2.54720857633528	2.58405780450021	0.718842981945749	3.59474581988091	0.000324708434157338	0.0244305820798522
AC114271.2	51.6028948692619	0.9107984531581	0.253439616771682	3.59374933074736	0.000325953439173727	0.0244305820798522
HOTAIR	177.397820306143	2.54781557667286	0.70914693105347	3.59278939963537	0.000327156992471399	0.0244305820798522
HRH1	2002.75269355292	-1.07814347579125	0.300144859617043	-3.59207709626232	0.000328052758960316	0.0244305820798522
GLRA2	2.23765645633555	2.92485510878677	0.814532263209008	3.59084009424468	0.000329613823504619	0.0244305820798522
GAS2	79.4843266702703	1.85308954977723	0.516258911585264	3.58945774725126	0.000331366533240435	0.0244305820798522
PCDHA9	5.39399137649885	2.54090537857661	0.707918655183803	3.58926178872471	0.00033161569821136	0.0244305820798522
LRFN2	12.3597287398253	3.1994908507108	0.891418370954936	3.58921349947425	0.000331677125825313	0.0244305820798522
CCKBR	3.62365256167817	3.02291125631215	0.842428200466332	3.58833103478587	0.000332801565241786	0.0244305820798522
TTLL9	15.9044714797583	1.49907250517929	0.417841333082692	3.58765968440613	0.00033365939012104	0.0244305820798522
ESPN	11.4365379974724	1.39385773560442	0.3885809979665	3.58704553979395	0.000334445931361257	0.0244305820798522
LAMP5	125.529233209109	1.91805446922825	0.534728515668864	3.5869687383869	0.000334544413655908	0.0244305820798522
EDAR	29.3390341164911	2.93208214969753	0.817452119802002	3.58685491011721	0.000334690425336372	0.0244305820798522
RP11.756H6.1	2.73317214457436	2.45236277191784	0.684063117968966	3.58499487474063	0.00033708482485375	0.0245386790385405
RP11.90L1.8	22.3277111936531	1.3055373682835	0.364930714693611	3.5774937973626	0.000346904448663143	0.0251852629729442
RP11.629N8.3	1.9141635766243	1.99361207184473	0.557574324318649	3.57550910236211	0.000349547013042077	0.0253087112246261
RTCA.AS1	22.8077949932144	0.88293623631299	0.247035678305699	3.57412436279905	0.000351401892316068	0.0253746172886941
AC091801.1	46.820259522878	-2.70247698999057	0.756984707146625	-3.57005493568988	0.000356906370849624	0.0257029998224199
RP5.855D21.1	18.8519281842866	1.46449765495765	0.410805519192013	3.56494152716858	0.000363937315691675	0.0261172622581861
PLCH1	58.9499573455387	1.68123917359712	0.471743788295037	3.56388195311146	0.000365410337498487	0.0261172622581861
AC092198.1	4.07429771842004	2.04882166571536	0.574903959844626	3.56376335669888	0.000365575556886232	0.0261172622581861
TRIM36	99.5639137066742	1.47734797346193	0.414889460268448	3.56082309853335	0.00036969409801765	0.0263414399494698
METTL13	4313.75329603993	-1.13973236058747	0.320203129679175	-3.55940418736511	0.000371697106166262	0.0264140943540691
LINC00890	43.2383891292816	2.8663061516482	0.806398397818632	3.55445417476247	0.000378764510999387	0.0268453094840779
HSP90AB2P	40.9448186847326	1.30639081584255	0.367951425151126	3.55044369051155	0.000384582397193801	0.0271859272458418
C6orf99	6.96903251016275	1.57911694000181	0.445127959707023	3.54755729350535	0.000388821173917532	0.0273947146220282
EIF3G	11061.320318609	0.881202673984009	0.248432785976377	3.54704662076205	0.000389575645358304	0.0273947146220282
RP6.65G23.5	14.7508867149579	-1.72597205902522	0.486736284446647	-3.54601067185164	0.000391110367812157	0.0274308268933947
PAH	5.21745192433865	2.28144921280442	0.643849296524666	3.54345221019748	0.000394924879839567	0.0276262294850272
RIPK4	50.2007633896317	2.22672664233229	0.628536322612856	3.54271752040627	0.000396026665380867	0.0276313461960022
LINC01314	20.2738006947035	2.12139463262491	0.599539213862669	3.53837511137486	0.000402597679342105	0.0279845030846915
ATG4D	603.434521958387	0.603157490738507	0.170479845303664	3.53799881542679	0.00040317186709015	0.0279845030846915
BANK1	187.433110438722	1.75341197444807	0.495759367185983	3.5368206644299	0.000404974551721926	0.028021896440787
PCAT4	3.93679305879175	-2.55703988075672	0.723086521376386	-3.53628480847552	0.000405796951659078	0.028021896440787
TMOD1	554.244319848234	-1.68544175579693	0.476730514841726	-3.53541823593251	0.000407130218016074	0.028041876708584
TAGAP	627.115774890817	1.56147308188861	0.44180054114631	3.53433945064251	0.000408795702299519	0.0280845784019685
FMO3	831.65513878592	-2.32274763445108	0.657803657261409	-3.53106524843785	0.000413889635926394	0.028226003154086
AC093375.1	6.56589504748475	2.54566912959204	0.720956083296988	3.53096282640476	0.000414049934108895	0.028226003154086
EXTL3.AS1	12.8913385488044	1.47356552707295	0.417384226506891	3.53047727607075	0.000414810646199408	0.028226003154086
ACTN3	11.2965049652579	1.72614799574006	0.488949446526028	3.53031997071332	0.000415057376437494	0.028226003154086
ZBTB8B	26.3234644027763	2.0302238058836	0.57531031643663	3.52891952026594	0.000417260004060634	0.028304136942113
RUFY4	49.7117394450965	-2.02493175993841	0.573996607090423	-3.52777653199511	0.000419065780709889	0.0283550251925165
LRRFIP2	2424.70875541546	-0.541132519100941	0.153664034131915	-3.52153008449849	0.000429063979216797	0.0289544545713746
DTWD2	163.27978458555	0.905063127470974	0.257054298306078	3.52090252306655	0.000430080685502883	0.0289544545713746
LHFPL3.AS2	2.7313173636746	1.90373204106533	0.540860081640558	3.51982352864877	0.000431834014166677	0.0289998132213632
NEBL	798.119267349481	-1.87482066254675	0.533190576631228	-3.51622992737818	0.000437721734352137	0.0293218983246062
ASPG	22.0230436505422	2.61873635367852	0.745327017450054	3.51354008692434	0.000442177687212236	0.02954670903954
RP11.404P21.9	11.9946975355867	-1.61466526225146	0.459881611772585	-3.51104549718313	0.000446347999075858	0.029694761315981
SELE	85.9009040008601	-1.97638148883377	0.562928444221557	-3.51089291920005	0.0004466042577491	0.029694761315981
SERTM1	459.644392880187	2.91052437577471	0.82929217863399	3.50964889186454	0.000448698763713958	0.0297603609651465
RP11.59N23.1	5.66948299635766	-1.9423470792414	0.553711029912205	-3.50787138834741	0.00045170736841385	0.0298861165771745
GDNF.AS1	18.7180019178004	2.47397239884523	0.705745500476534	3.50547385307416	0.000455795268605923	0.0300824877279909
GPR20	26.7295871276461	1.98419179761452	0.56617210369907	3.50457358222147	0.000457339164561891	0.030110403525641
LINC00475	114.45981769245	-1.31294272372899	0.375068133080833	-3.5005445889108	0.000464308556767872	0.0304173236027938
CXCL10	2225.073820481	-1.86504567784997	0.532928242027561	-3.49961876809958	0.000465923991135143	0.0304173236027938
FAM46C	676.463895674673	1.43575112571996	0.410337718187228	3.4989499187712	0.00046709430528212	0.0304173236027938
GPR37	110.620980456813	2.13426944122214	0.610022151015557	3.49867531477183	0.000467575585250482	0.0304173236027938
ESR2	35.3817775768884	1.41114487570745	0.403342630770196	3.49862565485036	0.00046766267023877	0.0304173236027938
CEMIP	3403.43849232971	-2.31943378783203	0.663463157617834	-3.49594964121287	0.000472377840704501	0.0306450725089746
FAM221B	2.60986273282346	2.04218612080611	0.584258492524813	3.49534691739099	0.000473445949341987	0.0306450725089746
PHACTR1	385.074111590483	0.862759661122882	0.246987365404873	3.49313277506566	0.000477389081143734	0.0308260228309687
IGLV3.1	1522.77681418331	3.39502014230085	0.972107843024459	3.49243159250535	0.000478644178904584	0.0308329494813787
SPINK13	53.8709716015267	2.27628012891676	0.652152373947758	3.49041147414285	0.000482277364261778	0.0309926664086122
DOCK3	74.141434261756	1.78544142099287	0.511764972436185	3.48879176410516	0.000485208976612975	0.0311066432691593
IGHV1.2	742.17636323944	3.4185004006594	0.980121876668501	3.48783195440867	0.000486954028507721	0.0311441883661296
IGHV3.30	799.220691782862	2.97040614703896	0.852962652114523	3.48245745540585	0.000496834160736702	0.0317006157380268
ESYT1	6583.96715277295	0.708562044869038	0.203740687323731	3.47776408422133	0.000505614717042515	0.0321844135762939
MUC4	29.05358553603	1.83027669586674	0.526625269678229	3.47548209561809	0.000509936031093605	0.0323331527294796
SBSN	122.129471218098	-2.86217137176429	0.823584856065347	-3.47525983593024	0.000510358750550939	0.0323331527294796
TDGF1	13.1978520936077	1.75541107026006	0.506271670911622	3.46733023220352	0.000525655667972231	0.0332239118895766
CTSV	88.4592952188015	1.77411884761984	0.511798965314158	3.46643695641478	0.00052740540140579	0.0332562532689257
C12orf29	1076.77628006481	-1.0539999898329	0.304173767648553	-3.46512455028897	0.000529985967499903	0.0333407097400056
SLCO1C1	64.432319739667	1.67271241108064	0.483316494563399	3.46090487267909	0.000538363013656336	0.0337885683944778
PDE3B	952.151062596879	1.62051875404862	0.468432326532095	3.45945115710879	0.000541277436154561	0.0338922948484471
RP11.98G7.1	5.09208000457092	1.48200220344451	0.428947697046198	3.45497181509498	0.000550350351289665	0.0343802584566116
WFDC2	70.7692708233195	1.67545162431615	0.485264105922663	3.45265929185203	0.000555089628629773	0.0345958645110278
PDE8B	882.699588687485	-1.45699712986355	0.422306005606654	-3.45009805809069	0.00056038296430889	0.0348449240445958
TDPX2	11.374011112269	1.41805848284769	0.411357402670906	3.44726623038837	0.000566290245171488	0.0350983568150956
UNC13A	83.4604284963611	1.74628201047094	0.506721518422063	3.44623614151789	0.000568453388955199	0.0350983568150956
LINGO3	31.853701078562	1.58304364446956	0.459406166342134	3.44584761905571	0.000569271266529089	0.0350983568150956
CKM	75.7158172845169	2.07065819436305	0.600948291447506	3.44565118801727	0.000569685189910718	0.0350983568150956
CTD.2256P15.1	14.1269250278415	-3.17090373412401	0.920577072907328	-3.4444739364514	0.000572171796748401	0.0351600665440165
TM7SF2	300.554172557066	1.13455238486824	0.329434500216811	3.44393918706619	0.000573304636522941	0.0351600665440165
LINC00950	59.1878168560937	1.18284045773424	0.34352562689262	3.44323789882485	0.000574793446059343	0.035171074141335
LEMD1	2.49716338378553	2.05950516799005	0.598287079564702	3.44233602619079	0.000576713380973765	0.0352083519084483
GNG7	502.735360372888	0.902968361134886	0.262519779353525	3.43962029588213	0.000582530835577173	0.0353988633883639
DUTP6	36.7834268693435	-1.01546672062737	0.295347885937201	-3.43820548234186	0.000585583154635153	0.0353988633883639
TAC1	18.2955463121427	3.1925214731412	0.928614959186199	3.43793888043651	0.000586159986224336	0.0353988633883639
COL19A1	29.5734659610293	2.48307236413265	0.722319796364474	3.43763576276084	0.000586816467539555	0.0353988633883639
SPTA1	54.3327156180046	-1.67069046161106	0.486089472010137	-3.43700194678608	0.000588191375822221	0.0353988633883639
LINC00589	9.32840439802722	2.33727747772911	0.680115249903983	3.43659031033208	0.000589085925782954	0.0353988633883639
XKRX	7.42258347053361	1.52931858985531	0.445040075235538	3.43636152102913	0.000589583667895167	0.0353988633883639
RP11.744J10.3	1.96131743025626	-1.8010092689463	0.524159072747541	-3.4359975102706	0.000590376397810551	0.0353988633883639
MSI2	1808.0810709292	0.951313263857768	0.276949544049897	3.43496959751764	0.000592620310481365	0.0354163440984544
HTR3A	6.1252674114662	2.15392023566607	0.627113682491203	3.4346567389658	0.000593304848645093	0.0354163440984544
ADAMTS9.AS1	70.0510861365987	1.72342486788879	0.502497200386699	3.42972033786959	0.00060420364473399	0.0359707056254669
TPPP3	3326.4139279182	-1.42002118622785	0.414091871434704	-3.4292418764655	0.000605269858637147	0.0359707056254669
SLC9A2	12.7252155226799	2.18843326157656	0.638435612436965	3.42780574727515	0.000608480685579117	0.0360816957528173
BRS3	1.52682147176387	3.16966117980392	0.925087971313908	3.42633487634915	0.000611785611721715	0.0361977645420015
BMS1P8	6.46675496123771	2.57395544486487	0.751908281908018	3.42323060777211	0.000618815550125141	0.036533238038377
SHANK2	273.64851037813	2.40032021112283	0.70194177903084	3.41954316273482	0.000627263803331757	0.0369507900988983
ABCD1	1387.11335811389	0.777614754115646	0.227487329058362	3.41827721717261	0.000630188850245921	0.0370418662916979
GPRIN2	3.58544534748892	3.13556923022318	0.918226030596045	3.4148119588679	0.000638260581444239	0.0374048712017256
PPAN	513.285976451019	0.837366830768621	0.245243318355879	3.41443280241991	0.000639149574923387	0.0374048712017256
SOX2	156.483824259928	3.11299975475195	0.912360981526256	3.41202639940205	0.00064481868102133	0.037654607412163
RHCG	17.2182534719326	1.85523666959076	0.543963269773505	3.4105918040445	0.000648220576511497	0.0377711521176829
CAP2	582.588484171784	1.93409314099773	0.567781737304117	3.40640252041391	0.000658250520186454	0.0382660534390562
PYGM	459.2557403173	1.49262989397489	0.438253616501463	3.40585870321029	0.000659563053468952	0.0382660534390562
NOX4	486.444912489949	-1.41024859789306	0.414595665889717	-3.40150347415399	0.00067016276747718	0.038703257162119
AC023137.2	4.70606540330027	-2.11584889218333	0.622113970460607	-3.40106313738104	0.000671243224906265	0.038703257162119
SV2C	9.13095992225449	1.5648187853807	0.460243656303459	3.39997904142529	0.000673910184309121	0.038703257162119
TRMT10B	364.100133736759	0.395499014590466	0.116338968409012	3.3995403259896	0.000674992255280638	0.038703257162119
RPS20P35	5.21269787939632	-1.52029545584743	0.44724068934547	-3.39927804438447	0.000675639931757574	0.038703257162119
RP4.738P15.1	4.15823201743327	2.42900592559735	0.714574068278169	3.3992360392398	0.000675743712643652	0.038703257162119
CD79A	845.257000389752	2.40309559404633	0.70713965138044	3.39833240768657	0.000677979880474457	0.0387487139346912
GDF15	2574.16935183132	-1.52379783276601	0.448544898927437	-3.39720245712239	0.000680785786830074	0.0387647461943501
KLHDC7B	835.86841145956	-1.77947370530598	0.523860435045631	-3.3968469200217	0.000681670890890284	0.0387647461943501
NUTM2A	16.9491928252775	1.08986645792146	0.320881326031136	3.39647829121633	0.00068258971595293	0.0387647461943501
HNF1A.AS1	1.96758479092049	2.12962808535973	0.627140851967927	3.39577318026261	0.000684350446894749	0.0387827462119974
FRMPD4	15.8736359081237	2.05246291646958	0.605092752476539	3.3919806642357	0.000693893367736362	0.0392407655665982
RP11.798K3.2	6.18054205398524	2.24864116584566	0.66325747227304	3.39029903144457	0.000698164229609179	0.0393523894010585
AACSP1	9.35368784064793	2.95648743710072	0.872107164103504	3.39005062541814	0.000698797176096527	0.0393523894010585
STRC	4.2568146354583	2.13273340268454	0.629340044241201	3.38884109187107	0.0007018867331688	0.0393763984243909
ABHD5	670.138613907053	-0.66921869721019	0.197483267642599	-3.38873619622969	0.000702155269350131	0.0393763984243909
FLNA	63054.0277666799	0.967141596471991	0.28546334984918	3.38797115981076	0.000704116676243353	0.0394041294942687
NKD1	114.467335813837	1.42006955366226	0.419364355966392	3.38624285411626	0.000708566479364289	0.0395707126168057
AC007255.8	5.27527450142708	2.37436955571103	0.70177393310317	3.38338237388189	0.000715988703791912	0.0399022584258472
MAP3K15	17.7578595639065	1.35278403557737	0.399901700010784	3.38279140984121	0.000717531081992122	0.0399054242742699
PPFIBP2	1038.91471596322	0.910513364475596	0.269211181528326	3.38215284857993	0.000719201155410885	0.0399156641253041
RP11.272P10.2	3.19982357197433	1.45789595774667	0.431172278070144	3.38123769058617	0.000721600928734771	0.039966276593141
CA3	72.4034496931013	2.22142442330623	0.657615882065202	3.37799691870274	0.000730158988154394	0.0403570591353978
BMS1P1	49.442073451724	0.97407207000763	0.288452249412719	3.37689191882127	0.000733098502216219	0.0404363284733718
CRB1	8.192901550292	1.30524369309908	0.386613076281765	3.37609815387571	0.00073521685105213	0.0404610157935354
RP13.616I3.1	6.26826828282764	1.72722020042249	0.511678515092153	3.37559649169834	0.000736558585475348	0.0404610157935354
BTN1A1	12.8433025788779	1.9693069285605	0.583586326131886	3.37449121128903	0.000739522773146737	0.0405019955100063
MRAP	31.8647569078037	2.88371139767351	0.854647051872132	3.37415473598914	0.000740427344287251	0.0405019955100063
AC098614.2	105.326423501003	-0.616809649896839	0.182832386848898	-3.37363451042511	0.000741827927590019	0.0405019955100063
QPCT	597.532845380254	-1.34167544113311	0.398130937593382	-3.36993515058953	0.000751858755626473	0.0409663892365889
STRBP	537.658461356985	0.688777878673194	0.204471181141192	3.36858169855036	0.000755560010604756	0.0410847226819129
CTD.2334D19.1	11.2784476542232	2.30097957025714	0.683359126379138	3.36716007942875	0.000759465894406479	0.0410919092279579
VWA3A	8.28162838494087	1.45629126525068	0.432555192280692	3.36671779980778	0.000760684871584855	0.0410919092279579
CC2D1A	2437.76837347241	0.626284449912716	0.186042560951551	3.36635040234589	0.000761698845361027	0.0410919092279579
EFNA2	17.1095928559296	2.68649388650429	0.798053088345536	3.36630974271865	0.000761811138244473	0.0410919092279579
RFX1	1683.25788235525	0.851711201745113	0.253107466000757	3.36501808975704	0.000765386407928725	0.0411586196042307
NR6A1	111.093003481281	1.22049629479409	0.362729454715922	3.36475651184693	0.000766112344654729	0.0411586196042307
FOXP4	3017.08830099395	1.10541021863606	0.328625428147757	3.36373915088227	0.000768941829384609	0.041228174492873
ZNF846	357.374612233719	0.728152964964897	0.216592944286433	3.36184988557131	0.000774222008405666	0.0414285888242888
PARP11	624.346146237448	0.699381232544698	0.208237645399566	3.35857251556378	0.000783461622772901	0.0418396542960749
DDR1	1126.32968767114	0.81352819999771	0.242380818308372	3.35640503929106	0.000789628323549245	0.0420853095777378
TMEM187	653.772011467813	0.850667771124563	0.253674082106625	3.35338858451849	0.000798285457632728	0.0424624632929314
ACTN2	83.4226070978566	1.78332803993881	0.531900045589595	3.35275030473449	0.000800128556258764	0.0424763898779109
AC141928.1	57.9691908463763	1.92879767009918	0.575467575360301	3.35170520926667	0.000803154905925633	0.0425346887080971
KSR1	1640.09985286964	0.680859006379216	0.203163959213209	3.35127848962962	0.000804393636501874	0.0425346887080971
ARF6	6152.39382369938	-0.373834555335733	0.111594715470409	-3.34993062852389	0.000808318015865028	0.0425927457421272
FMO4	751.867161568333	-1.2842399115363	0.383376655421753	-3.34981249738199	0.000808662807255039	0.0425927457421272
ROCK1P1	22.3871918060731	1.19341302311784	0.356558758510503	3.34703045327853	0.000816822365067679	0.0428682729491194
EYA1	366.612890062961	2.08408414732138	0.622683245303626	3.34694110214121	0.000817085687958794	0.0428682729491194
RP11.110I1.14	4.61596786690474	0.970472506538815	0.290220559116048	3.34391370995451	0.000826054265987852	0.0432543268868727
MZB1	1451.47710890486	2.56662796140402	0.767764063483436	3.34299048819624	0.000828807407157232	0.0433140555857151
RP11.762I7.4	13.2503391088891	1.61506689734239	0.483399170846314	3.3410626139776	0.000834583992412613	0.0435312528236653
SYN3	27.4903466091652	1.37398760372573	0.411460616889644	3.33929311172505	0.000839918888822487	0.0437246147123055
ZNF98	19.6154679071292	1.96057273119758	0.587281002556203	3.33838949781105	0.000842655391051808	0.043782222658479
BTBD17	12.4668241165147	3.02632102030995	0.90676475210973	3.33749300826785	0.000845378487714237	0.0438389130057526
HOXC12	251.563458972166	3.40142718859203	1.0205348822839	3.33298473931612	0.000859196549790317	0.0444696295192052
AC012363.13	10.1808362705691	2.10837754638438	0.632746384078861	3.33210524696038	0.00086191653319741	0.0445024864088967
RIMS3	150.29220381908	1.29210053216749	0.387819151028466	3.33170893892408	0.000863144792607966	0.0445024864088967
MMP7	24.5015628763354	-1.69901181975853	0.510365375406941	-3.32901074725889	0.000871550411855306	0.0448497838376575
WISP3	20.7958337680955	-1.10822763629295	0.333169885347856	-3.32631394681986	0.000880027480222746	0.0451994228943468
BCL9	2777.21145796086	1.21383133432119	0.365176426395709	3.32395863090536	0.000887493600167814	0.0454959028391371
RP11.493L12.4	9.67944422288701	1.66122480213048	0.499917265432661	3.32299945810583	0.000890550874563463	0.0455656716048071
SYCP2L	44.6888668266862	1.56518027754884	0.471451357989419	3.31991890790983	0.000900435994176443	0.0459838625010791
ITIH1	8.94062103049698	1.92481168052991	0.580127202080438	3.31791316391854	0.000906926749056705	0.0462274503475545
CYP2C18	18.3265768030656	2.75989991070313	0.832540911161359	3.31503217884294	0.000916325757229186	0.0464706706638351
ARSK	542.803506667699	-0.455803883981637	0.137505874542314	-3.31479571690136	0.000917101192088003	0.0464706706638351
TSPAN2	198.978170771183	1.28652314303719	0.388118442717768	3.31476941427573	0.000917187484439415	0.0464706706638351
ZNF257	122.514143570421	1.30069404801692	0.392445119194905	3.31433360844255	0.000918618350178558	0.0464706706638351
L1TD1	9.47311054394883	-1.79235556585973	0.541136071621667	-3.31220862894692	0.000925624898623222	0.0466766720806601
LEF1	1008.85964868589	1.61335340997597	0.487116966785703	3.31204519649946	0.000926165818591014	0.0466766720806601
TSGA10	60.0393474824656	0.745683685885505	0.225318408356477	3.30946632955864	0.000934740080869185	0.0469262677347314
PDE3A	1275.28829852165	1.27675860713721	0.385856624578636	3.30889383726782	0.000936653461498529	0.0469262677347314
CCDC33	18.7085067794671	2.18517200676625	0.660625348983657	3.3077326053686	0.000940545673849149	0.0469262677347314
SMPX	5.42280041944743	4.20978963051137	1.27287533932259	3.3073070869232	0.00094197567214566	0.0469262677347314
TAC3	8.30622036430099	2.22270799840349	0.672162346042937	3.30680230972281	0.000943674639297324	0.0469262677347314
HOXB9	207.841267056245	1.56844432965754	0.47437858518413	3.30631351971496	0.000945322501956269	0.0469262677347314
B3GALNT2	290.033426002526	1.06404156299677	0.32184663897707	3.30605149824969	0.000946206954617951	0.0469262677347314
GPM6B	621.342060340751	1.37074679097824	0.414638545210266	3.30588365894232	0.000946773898395197	0.0469262677347314
CASP7	2178.69792544811	-0.426236093083162	0.128933347095858	-3.30586386442188	0.000946840782973137	0.0469262677347314
AP1G2	632.431184543432	0.791662103802309	0.239518980654397	3.30521657047549	0.000949030366311982	0.0469481651931353
MCF2	12.416155366302	1.58942349714807	0.481017707072382	3.30429311391004	0.000952162236976361	0.0470165110471673
LRRTM3	43.8911347614384	3.52593933291251	1.06727660930615	3.30367901082812	0.000954250243204684	0.0470331560237876
PLCB4	484.00952589092	1.61394550884659	0.489029608414758	3.30030223339313	0.000965807568148834	0.0473296470270393
ATP6V0D2	27.6720279001725	-2.42306282180004	0.734214753674769	-3.30020993132123	0.000966125292889965	0.0473296470270393
RP11.477D19.2	48.5823408307659	0.819933783673578	0.248455749255928	3.30011998566789	0.000966434999425394	0.0473296470270393
HDAC9	628.573727441826	0.973107548483558	0.294898061449228	3.29980991974441	0.000967503342878013	0.0473296470270393
HEBP2	3022.62422265738	1.08406444833332	0.32856867716388	3.29935421017818	0.000969075491954122	0.0473296470270393
LTBP2	10583.508120534	-1.34496889646869	0.407748251876926	-3.29852768289648	0.000971932960673351	0.0473830547905763
IGHV3.23	2423.57354386864	2.7854374561362	0.844837324680909	3.29701041225687	0.000977198784559534	0.0475534669399243
SOX2.OT	15.9771037227365	1.67386318032241	0.50784450558306	3.29601514227398	0.000980667293665626	0.0476359581237723
IGHG3	26232.0111416779	2.78228902471238	0.844756717734888	3.29359798661649	0.000989138582636772	0.0479607231169476
LINC00472	28.7247728663418	1.14083745973287	0.346664084110835	3.29090180385724	0.00099866767239597	0.0483355153439649
DDX60L	1396.49814755762	-0.647073986681682	0.196727944071627	-3.28918186857118	0.0010047907458019	0.0485444047009542
CEACAM6	29.3375070755175	4.4978720312097	1.36853031336492	3.2866440642812	0.0010138889765923	0.04887747488817
HIF1AN	2057.6547738253	0.357937455008067	0.108919868933518	3.28624573746543	0.00101532391436225	0.04887747488817
TSPEAR.AS2	33.8750931315704	2.03253375700127	0.61866520984649	3.28535324865868	0.00101854585477371	0.0489448635973728
MROH2A	1.25204996851567	2.38092729552962	0.725276148795864	3.28278725211431	0.00102786205482384	0.0492414587440834
CLDN10	24.5033749078468	1.87825969768693	0.572178910401486	3.28264405335911	0.00102838427352508	0.0492414587440834
ACP6	404.965963158997	1.05927368028701	0.322856813495072	3.28093952492404	0.00103461925077448	0.0494518546517869
HMGB1P41	2.31265591815886	1.62503808592755	0.495494489227589	3.27962897924611	0.00103943685056903	0.049593876873864
EML6	61.289340948651	1.18265117631108	0.360665069511667	3.27908432583273	0.00104144511000421	0.0496015931647751
IL10	138.945160099517	-1.29267114565317	0.394432142584366	-3.27729666548836	0.00104806187418447	0.04982838595459
MCMBP	3489.3277013354	-0.289356429096966	0.0883776108929751	-3.27409200331717	0.00106002092140809	0.050307918711774
XXbac.BPG308K3.5	5.05529131239224	2.3323512048807	0.712851485861961	3.27186132194208	0.00106841968842283	0.0506170893658098
KIF1A	723.148581087827	2.46325401170888	0.753649779752827	3.26843326686402	0.00108144676593857	0.0511440546243695
ECEL1	298.731196981352	2.18799059972891	0.67006664442738	3.26533281118433	0.00109335529057093	0.0515388563254711
GOLGA8IP	1.87406887941162	1.99506551945638	0.610997241920899	3.26526108887848	0.00109363219810582	0.0515388563254711
RP11.409C19.2	2.25237739976522	1.78050353396851	0.54592753920355	3.26142831439878	0.00110852457493686	0.052065306714502
RTN4RL2	354.720883390832	-1.30330849433032	0.399617660623261	-3.26138862906516	0.00110867974985836	0.052065306714502
TAT	5.69350710185974	2.14160589507182	0.656824236594365	3.26054639240485	0.00111197774721646	0.0521290510396659
RP11.60L3.1	20.7490872729073	2.48301500989353	0.761862960600476	3.25913601041387	0.00111752078661544	0.0522976365332126
VWA7	35.3726386068679	1.33174824239342	0.408702227608324	3.2584805083805	0.00112010570669125	0.0523274425967656
MPZL1	13519.5128141724	-0.891333495213747	0.273613127418121	-3.25764155990827	0.00112342209843294	0.052391257652961
CPNE6	4.24607492403364	2.60020576926076	0.799496635090633	3.25230358094752	0.00114473684606505	0.0532263665976978
RP11.15E18.1	9.22632914388151	1.19447913247964	0.36728728902531	3.25216572468241	0.00114529223041729	0.0532263665976978
ARL1	5713.85359889286	-0.739558930397813	0.227584904332422	-3.24959571711125	0.00115569178184948	0.053546236819482
CFL1P1	22.2392538293945	0.670475265805231	0.206333090193589	3.24948007697732	0.0011561617658886	0.053546236819482
WWOX	491.443111789862	0.486980283480265	0.149906742724335	3.24855489906668	0.00115992823400909	0.0536214244248665
TMEM150C	615.940036656616	1.03418687206736	0.318397323267087	3.24810165316571	0.00116177756739157	0.0536214244248665
RANBP3L	185.65381977022	-2.00647590469939	0.61800519799905	-3.24669745690792	0.00116752427933965	0.053794231889574
GAS6.AS1	145.375545731647	1.15061243707257	0.354548902138464	3.24528557311176	0.00117332892805411	0.0539691124407355
DSE	4452.79324904964	-0.82302631787977	0.253748843068298	-3.24346825754097	0.00118083967487239	0.0541356259332557
NAA40	865.721473823388	0.429193118372107	0.132332223174775	3.24330014319535	0.00118153671137367	0.0541356259332557
LAX1	122.642595305012	1.76313993852084	0.54368418767811	3.2429487163322	0.00118299502728096	0.0541356259332557
ZFHX2	91.6806798014705	1.04192898909738	0.321419697806414	3.24164634653138	0.00118841398495621	0.0542911164351932
PVALB	50.7812989928515	1.63864630823013	0.505920839376179	3.23893815137295	0.00119975586779699	0.0546355701757843
FGF11	15.6203241783018	1.80676217788515	0.557924850059076	3.2383611837577	0.00120218508503992	0.0546355701757843
RP1.97D16.1	2.57025693438685	2.32808262103318	0.71892616347589	3.23827778054048	0.00120253661476686	0.0546355701757843
GBP4	2359.78586245214	-1.01929494550518	0.31480031301961	-3.23790956790341	0.00120408970084373	0.0546355701757843
KLHL31	33.7838012185741	1.54035507721078	0.47638577014889	3.23341958079343	0.00122317768609695	0.0553915653867381
ZHX3	3393.71447067791	-0.728568134728712	0.225351946009417	-3.23302348894856	0.00122487491027185	0.0553915653867381
RP11.1143G9.5	19.4834435041408	2.21444278807769	0.68525381816282	3.23156577808593	0.00123113984247557	0.0555813083169391
RIPK2	1025.86911659315	-0.467400944096077	0.144703673744957	-3.23005582373727	0.00123766049874045	0.0556628082740115
PSG4	14.3267720691541	-3.37303794678784	1.04429186620503	-3.22997626999194	0.00123800493013738	0.0556628082740115
IGHV3.74	507.836996143462	2.46851104190679	0.764472844173122	3.2290369248849	0.00124207856423774	0.0556628082740115
LINC00621	2.93771820255013	1.50850291941827	0.467235485774912	3.22857095692637	0.0012441039053998	0.0556628082740115
NPR3	711.292819594138	1.4097539017286	0.436671286129276	3.22840989666364	0.0012448046667003	0.0556628082740115
UNC119	1074.22923394894	0.404313150538928	0.125244820431461	3.22818260384815	0.00124579422108886	0.0556628082740115
PAK7	1.89428359598952	3.10918479159164	0.963256506043481	3.22778488604498	0.00124752749472762	0.0556628082740115
KRT81	41.2237302451415	1.636818977784	0.507207162874196	3.22712117965491	0.00125042491896588	0.0556628082740115
C19orf33	24.3393837032459	1.22232624249414	0.37879816790567	3.22685362828505	0.00125159467640172	0.0556628082740115
USP50	3.26372805445743	1.13990910073839	0.35341505038158	3.22541187622778	0.00125791555080798	0.0558514504558742
ILVBL	4429.92801436513	0.525445396784461	0.163033004076671	3.22293881389413	0.00126882653697248	0.0562429347131269
IGKV4.1	5614.74348457441	3.03185737762992	0.940902076113173	3.22228790285424	0.00127171280222334	0.0562441398369535
FLJ16779	41.6271728409697	2.27085753264736	0.704841321391637	3.22179966430427	0.00127388172317637	0.0562441398369535
RP11.511B23.3	3.76320423979144	-1.83763192214707	0.570467733025148	-3.22127232753769	0.00127622816729156	0.0562441398369535
PDP2	304.880863001007	0.568576441181416	0.176519101419898	3.22104767477206	0.00127722899637189	0.0562441398369535
TMEM51.AS1	39.2500847945419	1.14569739600184	0.355909597074502	3.21906856521774	0.0012860772962004	0.0565410938306632
COLGALT2	1880.53991009472	-1.73680446530753	0.539723938710498	-3.21794966044509	0.00129110475317769	0.0565743684719994
FA2H	7.12061588956439	2.34149772497478	0.727764932236427	3.21738190624181	0.00129366271508301	0.0565743684719994
ZSCAN9	441.860464745011	0.397946676960247	0.123698577594918	3.21706752573521	0.00129508113753678	0.0565743684719994
RP11.452I5.2	21.8261218370055	1.00400824368728	0.312091836561204	3.21702821435505	0.00129525860361401	0.0565743684719994
B3GNT3	28.8054317317248	2.11898847257462	0.659379745451644	3.21360867874887	0.00131078182216195	0.057159450173562
AE000661.37	21.0298273009492	1.33634561678758	0.416217636771729	3.21068954970904	0.00132416905616381	0.0576496421177834
FAM3A	2947.93648081755	0.778277220685485	0.242636144466655	3.20758979415964	0.00133852267631035	0.0581802526392373
CLMN	527.163659404722	0.864226836987397	0.269575264745878	3.20588329126592	0.00134648588173737	0.0584318315916464
SRL	541.019500922684	1.90870761211325	0.595483274734156	3.20530851679313	0.00134917782670244	0.0584542173885179
RAPGEF3	1184.68936175875	1.03279583487106	0.32227026005656	3.20475067941361	0.001351795193807	0.058473305146608
POPDC2	611.903213363519	-1.25615735832283	0.392174273809868	-3.20305905361816	0.00135976095025086	0.0587233097196764
SHISA7	7.96092191158692	1.94467089420688	0.60762547762833	3.20044330892324	0.00137216359933375	0.0591638179860405
PI15	2489.18360421216	2.11486782274163	0.661085977694697	3.19908135113753	0.00137866259965885	0.0593487736410833
RP11.968O1.5	12.8630826586521	1.32292937612522	0.41367462599639	3.19799497718471	0.0013838669073683	0.0594257536633169
ADRA1B	300.657563824562	-1.36538372340618	0.426977975129845	-3.1977849044578	0.00138487535526902	0.0594257536633169
SOX6	214.774290042179	2.05257349605232	0.64205784276316	3.19686694771746	0.00138928993526355	0.059520105647607
FBXO15	15.2284323864812	1.03065994210336	0.322593454606331	3.19491895259034	0.00139870113284562	0.0598278818956992
RBM11	13.5511386986839	2.42886276992459	0.760523071394938	3.19367401368852	0.00140474646218246	0.0599525816908421
AP003068.18	23.063352335395	0.98464351157501	0.308337040974715	3.19340001597718	0.00140608020494492	0.0599525816908421
RP11.114F3.4	7.47333287100477	-1.83194221345504	0.574532801479619	-3.18857723830068	0.00142974808032638	0.060782130071271
NDUFA10	3263.42930406755	0.419206491114754	0.131473941366633	3.18851391201347	0.00143006128378539	0.060782130071271
AC007277.3	2.82323040594398	2.00448426004141	0.628834403942558	3.18761862816989	0.00143449601271782	0.0608742999899305
NUDT14	754.65599198629	0.768950078094281	0.241287372374919	3.18686415507673	0.00143824308434724	0.0609327201728321
KIT	1250.88701197254	-1.10817651501676	0.347784932337207	-3.18638449219039	0.00144063000709275	0.0609327201728321
COX6A2	11.2820470844066	3.02489774349383	0.949442196201759	3.18597357016038	0.00144267776151892	0.0609327201728321
ADAMTSL1	2134.90470209752	-1.325460835084	0.416179218384264	-3.1848318621719	0.001448381344484	0.0610775819082092
RP11.93G5.1	2.47935468118841	1.42219643199497	0.446618547011591	3.1843649161262	0.00145072002993278	0.0610803157430317
TECTA	81.1113435068885	0.834342302999016	0.262060987688437	3.18377149669817	0.00145369717573604	0.0611098803358707
RP11.513G11.3	17.1973985876436	2.23609910746966	0.702758915903318	3.1818865002878	0.00146319146965324	0.0614128894653521
RP11.569G13.2	2.91027587273749	2.00757685124417	0.631040781059667	3.18137418610723	0.00146578173675251	0.0614256302849392
RP11.154J22.1	24.0672638871654	1.01400775299472	0.318953871463734	3.17916740856997	0.00147698760875646	0.0617988179850715
EPCAM	40.70806791925	1.58385996584814	0.498452586511105	3.17755391126423	0.0014852307437677	0.0620470734666999
FOLR1	18.0443604001411	1.5394632488968	0.484584968529895	3.17686958711726	0.00148873964615944	0.062060480523317
TMEM252	9.28169372506709	1.5421067395511	0.485459706389372	3.17659059908512	0.00149017236011985	0.062060480523317
CASQ2	137.994965285176	1.39625007761393	0.439753999062947	3.17507079091751	0.00149799951138342	0.0622151465613555
CTD.2223O18.1	2.61432654309556	1.77776602920772	0.559931545004222	3.17497030676189	0.00149851834655636	0.0622151465613555
SCUBE1	331.225450179415	2.29484646762592	0.723073704577663	3.17373796488189	0.00150489484260298	0.0623438944045442
PLEKHS1	10.1359645915169	1.96514262667011	0.619310260429335	3.17311491869645	0.00150812816997557	0.0623438944045442
CDH15	61.1049326767398	1.91085741306043	0.602280334965344	3.17270430748894	0.00151026255338612	0.0623438944045442
FAM216B	6.87979246980758	2.37285755597378	0.747937779467773	3.17253335920842	0.00151115197365231	0.0623438944045442
ADRB2	244.930736400162	1.19209340657763	0.375810040341338	3.17206375192873	0.00151359775939412	0.0623438944045442
FBXL12	1771.27670224931	0.751954148187628	0.237083084880894	3.17169041631712	0.00151554474894525	0.0623438944045442
CPQ	5048.59543731916	-0.635400919636232	0.200401909018605	-3.17063306805746	0.00152107147210336	0.0623959370730655
ALDH5A1	373.132174943877	0.94055341454972	0.296677613795472	3.17028778314947	0.001522880281675	0.0623959370730655
CPSF1P1	17.962166425635	1.94117294986556	0.612334896398044	3.17011648574037	0.00152377837539762	0.0623959370730655
OBSCN	860.291976096944	1.32217970093515	0.417335265425576	3.16814755538778	0.00153413635224009	0.0627083808382861
ZNF385B	79.1565325582789	2.1617514108571	0.682418432866178	3.16777992320295	0.00153607752928271	0.0627083808382861
SORCS1	180.292232150941	2.28756588520864	0.72242397981944	3.16651433107244	0.0015427774397726	0.0627947553014912
CPEB2	856.401675999959	-0.708810509739524	0.223846882038077	-3.16649713092252	0.00154286868062632	0.0627947553014912
SOSTDC1	298.122352746237	3.06655237015898	0.968669614817866	3.16573610160733	0.00154691065601592	0.0628640151919811
ZFHX4	1990.94524707696	1.22143445789188	0.38592748994116	3.16493250604693	0.00155118929245923	0.0629426688429607
ZFP69B	89.6655158543029	0.787385395418876	0.248900507036135	3.16345436493853	0.0015590879276878	0.0631677525091248
RP11.4L24.3	8.32167681776496	1.44152462058508	0.45576409263511	3.16287448677793	0.00156219668228386	0.0631983844570921
KCNMB1	219.517564861513	1.27748452751118	0.404275744026881	3.15993365020247	0.00157805070735448	0.0637437565427911
AC104809.2	3.54700778904832	1.55032588029011	0.491552946915497	3.15393466770657	0.00161085143173464	0.0648343154478554
CRYBA4	5.90113552284488	1.79268831166051	0.568427532796779	3.15376755738787	0.00161177406303981	0.0648343154478554
CMTM2	27.1514710373383	-1.0467714451775	0.331921235696404	-3.15367422328754	0.0016122895807895	0.0648343154478554
TBK1	1467.45566339078	-0.611764009673745	0.194019780749423	-3.15310123179573	0.00161545774579511	0.0648646128064996
CLDN2	7.73646787547847	1.31444811430358	0.417139102519028	3.15110260909577	0.00162655336593492	0.0652126515160356
RFX4	8.3993281894145	3.15806291907382	1.00267951904105	3.14962344308595	0.00163481026882087	0.0654460110895173
NAA50	4666.65774432415	-0.306753597476241	0.0974932989275687	-3.14640699258868	0.00165289822446515	0.066071654919022
IGKV1.16	322.703872202563	3.26191433088434	1.03693301863058	3.14573291840216	0.00165671219547911	0.0661151710430452
MSLN	62.9071940517356	1.96356157793771	0.624352122069627	3.1449586035342	0.00166110332939323	0.0661151710430452
RP11.203L2.3	3.88338657856817	1.50502801777444	0.47855973425993	3.14491151267019	0.00166137072645579	0.0661151710430452
AC109309.4	7.09732776108163	1.87209452429969	0.595487881016149	3.14379953644921	0.00166769640534663	0.0662687290538774
RP4.669L17.10	14.6656084822814	1.4439146542555	0.45967766742742	3.14114597373493	0.00168288131546744	0.0667733499203641
ST6GAL1	2902.23343328275	0.897070581983074	0.285727505538191	3.13960176950192	0.00169177640599287	0.0669617832882348
CASC1	9.28622248256351	1.0731510680916	0.341827033381904	3.13945640130993	0.00169261599481466	0.0669617832882348
PTPRZ1	400.484330167681	-2.07472125204272	0.661478672780932	-3.13649001459164	0.00170983259184311	0.0675434162971907
PON1	45.4629592490745	2.3623073528109	0.753366941282256	3.13566633119071	0.0017146416534731	0.0675441732658835
PDZRN3.AS1	3.82438011680547	2.52824504822972	0.806296892918057	3.13562543826727	0.00171488072992825	0.0675441732658835
COL25A1	212.379497813238	1.53516980103294	0.489904600437992	3.13360968576422	0.00172670370131629	0.0678236959691948
MSTO2P	119.970603870182	0.837113962710335	0.267145158144887	3.13355468810826	0.00172702732644365	0.0678236959691948
SEC62	6936.30592298131	-0.328471018028821	0.104867376877395	-3.13225168598287	0.00173471097333066	0.0680110074367782
ABCC11	13.3420923168519	1.42660530033643	0.455509666901738	3.13188808931289	0.00173686066196225	0.0680110074367782
MEX3A	813.258367434935	1.26348834321815	0.403582847217477	3.13067899671488	0.00174402679589378	0.0681733482284718
RP1.80N2.4	5.99478110663167	2.03227918155048	0.649287887122704	3.1300124672839	0.00174798884326846	0.0681733482284718
LINC00092	43.7180205175896	1.37053001506284	0.437882112190229	3.12990637641631	0.00174862024158354	0.0681733482284718
PECR	199.847900248999	0.885305564039102	0.282924353564745	3.12912463308503	0.00175327924557629	0.068255923325609
GSTA2	2.83625149773549	2.35012911385631	0.751778730114596	3.12609152096931	0.00177146412311506	0.0687166702380513
TRIM15	9.15018463695531	2.61164523889024	0.835468579729408	3.12596464098757	0.00177222859080741	0.0687166702380513
MTHFD2P1	4.37307821790516	-2.7959356307977	0.894449901640474	-3.12587169574259	0.00177278878992516	0.0687166702380513
RP11.209A2.1	2.01239563995144	1.66628268908404	0.533410865302705	3.12382592382786	0.00178516035370361	0.0690965092524301
MON1B	1622.16708186163	0.333767562704418	0.106872243639682	3.12305189203016	0.00178986187678079	0.0691788053727849
RP11.363N22.3	11.6869087170593	1.13610778172217	0.3639097960884	3.12194888385525	0.00179658129237302	0.0692565117445789
C19orf45	8.20674578042838	1.30446601219114	0.417896972333057	3.12150146699675	0.00179931351496506	0.0692565117445789
TRIM26	2809.73008434902	0.421939097133558	0.135173920187437	3.12145343235207	0.00179960707310387	0.0692565117445789
CTD.3025N20.3	70.4758235420083	-0.774543780614837	0.248314100317052	-3.11920982185822	0.00181336778300814	0.0696862451890768
E2F7	576.793601859781	1.45740144565656	0.467411097687747	3.11802918857988	0.00182064771554342	0.0698660556213248
AC078942.1	7.98281779125304	1.97350802523365	0.633192131789189	3.11676018408059	0.00182850249685302	0.0700206355913704
DHX16	1930.71952716254	0.338306613420594	0.108552104704429	3.11653665621457	0.00182988929287253	0.0700206355913704
RP11.79O8.1	2.01285133151749	1.74624244476276	0.560548813359024	3.11523707328645	0.00183797123697789	0.0702298483182077
SOHLH2	18.7067017792551	1.39517983356617	0.448068183068733	3.11376680221044	0.00184715420383146	0.0703443630843835
RP11.495P10.6	5.27217206030423	1.72326610307177	0.553476383971548	3.11353140436857	0.00184862835202208	0.0703443630843835
NEB	150.311727685546	1.28897009808496	0.414031681827466	3.11321610074781	0.00185060459325204	0.0703443630843835
RP11.334C17.3	32.8066495238017	1.0257854293202	0.329507958212438	3.11308241198492	0.00185144310552674	0.0703443630843835
CHODL	615.581006133317	2.39612455423314	0.7700533853988	3.11163433557561	0.00186054801183811	0.0705263933007741
TMEM27	21.7787298422673	1.19439945553387	0.383867895722376	3.11148566692771	0.00186148510350119	0.0705263933007741
TMEM50A	6956.43848508928	-0.369196840436571	0.11869412127388	-3.11048968958345	0.00186777416182533	0.0705334436247326
RP11.599B13.7	2.82904311916319	1.39075422114782	0.447125017862928	3.11043704911671	0.00186810710036086	0.0705334436247326
KLHL41	236.230771452082	2.00397417689934	0.644321335176015	3.11020925040748	0.00186954850200319	0.0705334436247326
TNFRSF17	63.0390285561813	2.40971596745585	0.774960331121826	3.10947008599468	0.00187423262095193	0.0705610301360169
SAMD12	99.6958767759182	1.28225333701329	0.412397553941829	3.10926513689788	0.00187553330046594	0.0705610301360169
POLRMT	2370.84511516506	0.54240558308705	0.174503080367857	3.10828658120902	0.0018817549994613	0.0706960878259155
RBFOX1	28.9585179088231	3.0350780748384	0.976856320353539	3.10698514366981	0.00189005896904419	0.0709088883051188
CA9	219.806361384484	2.2503980613618	0.725209662742755	3.10309994057547	0.00191504957583906	0.0717462506362465
BDH1	281.429782237991	1.17595792991248	0.37921461744822	3.10103533936967	0.00192845273883286	0.0721477680648027
LINC00652	23.7466922776453	1.15546526171254	0.372764120624392	3.09972231173187	0.00193702152220108	0.0723675551173372
RP11.620J15.4	35.6586048227033	-1.66737664966569	0.53811481468316	-3.09855184092531	0.00194468944053761	0.0723747967470925
GJA3	84.7436975092495	1.73331636244776	0.559412345084157	3.09845926297355	0.00194529711943488	0.0723747967470925
THEM7P	11.7985330504499	1.86013478555085	0.600341891473953	3.09845908134758	0.00194529831179364	0.0723747967470925
AC104809.3	19.2242823009231	1.54145480954153	0.49790190239058	3.09590062247309	0.00196216110867464	0.072901205672501
D4S234E	73.7567282646461	1.63476355417637	0.528231582829689	3.09478571012185	0.00196955138780254	0.0730747090872262
MAPT	207.203022133212	1.27292161844109	0.411600029473891	3.09261789914871	0.00198399407293053	0.0733598495890276
CTCFL	1.83129361208055	1.75528809836234	0.567580377933019	3.09258065748265	0.00198424303659719	0.0733598495890276
PRMT8	23.8421996667471	1.44189859554391	0.466271211687078	3.09240321813304	0.00198542962740016	0.0733598495890276
VSIG1	27.9488525025916	1.44883202276299	0.468735546770695	3.09093695313822	0.00199525994341239	0.0736218030219005
NR5A1	4.58243720798566	2.62821839502711	0.850907465524263	3.08872409928594	0.00201018023813613	0.0740705919846538
TDO2	1598.0079536765	-1.79805243922078	0.582446878702824	-3.08706682955406	0.00202142145625281	0.0743827714491273
HMGN5	537.201372722259	1.03408462423144	0.33516743191179	3.08527776202193	0.00203362138237184	0.0747293263656258
RP11.210M15.2	86.5935700465996	2.26481860535806	0.734277596680415	3.08441741324676	0.0020395122568216	0.0747301542092835
LINC00282	3.28908516651135	2.20714737295985	0.715686764161373	3.08395723308666	0.00204266956892512	0.0747301542092835
RP1.140C12.2	4.15794093654855	1.69621722826055	0.550067707108656	3.08365171476153	0.00204476821712817	0.0747301542092835
C10orf91	2.20007142367137	2.23384932454816	0.724416996993172	3.08365117580092	0.00204477192107153	0.0747301542092835
HCG16	4.40951761898012	1.51394352895352	0.491042593853076	3.08312058445688	0.00204842133516468	0.0747618123711871
TLR4	2440.44157131516	-0.870976688309585	0.282648226438857	-3.08148647979574	0.00205969830283691	0.0749571219423856
VSIG8	10.6903914148581	1.18797948084056	0.385543965469563	3.0813074181921	0.00206093746438637	0.0749571219423856
CNOT6LP1	7.77202848320845	-1.84781716563268	0.599719995621908	-3.08113316067859	0.0020621440367591	0.0749571219423856
FZD10	120.533243508187	1.77451149125197	0.5761005332018	3.08021150647049	0.00206853642562019	0.0750878722500131
RP11.110G21.1	92.9882869738057	0.696599961364	0.226204693288021	3.07951153107613	0.00207340343917886	0.0751629732567105
SHROOM2	309.734052677254	1.34675542111588	0.437406716380582	3.07895459918838	0.0020772833554376	0.0751777359979749
FER1L5	26.2647973059449	1.25142054659833	0.406483535281507	3.07865002633297	0.00207940800560254	0.0751777359979749
SLC35F4	15.568928190071	-1.74930579600679	0.568300535689498	-3.07813504677489	0.00208300495336939	0.075206557872861
MYB	118.78757427293	-1.2589308945362	0.409069057954308	-3.07755101505825	0.00208709111150297	0.0752529415264334
PLIN5	45.3963051997969	1.57046055619089	0.510436798725625	3.07669932910747	0.00209306308294383	0.0753671052735083
PXYLP1	1271.59949763261	-0.775312077172607	0.252061528460532	-3.07588421726961	0.00209879327285191	0.0754722689362089
RP4.614O4.12	27.0845164266266	-0.713900545403484	0.23213014550127	-3.0754322919234	0.00210197647887653	0.0754856847267132
AC019117.1	3.03965777045829	1.73680651316295	0.56491841191231	3.07443778878382	0.00210899701439515	0.0755557462692167
MAMDC2	1051.49872376254	-1.51596218518436	0.493098593457436	-3.07435917542365	0.00210955288891045	0.0755557462692167
CIDEA	18.6457525113407	2.49612794799121	0.812096743882447	3.0736829901051	0.00211433974179679	0.0756263570494613
SRGAP3	501.027251952319	0.826025354309755	0.268791816645127	3.07310454841829	0.00211844255085601	0.0756723454801784
RASGRP2	450.855210708	1.12595790567617	0.366471552048398	3.0724292223574	0.00212324178460347	0.075743055535217
MIR1.1HG	1.55261721310807	4.06483120469901	1.32332573903248	3.07167848761933	0.00212858861416144	0.0757604378058072
DCAF6	3077.22684439226	-0.685912115047674	0.223323038148552	-3.07138986077832	0.00213064753551565	0.0757604378058072
ABCF1	4563.97339377331	0.403136695317135	0.131264696736314	3.07117378351135	0.0021321901191717	0.0757604378058072
MYBPC3	18.5174356628006	1.42649512305437	0.464698535031244	3.06972158403397	0.00214258402301709	0.0760291836542737
SORCS3	43.8600784426414	2.65113055682754	0.864237113447366	3.06759628298351	0.00215787931623779	0.076470915821609
RP1.34H18.1	55.8493111145795	1.91077481068185	0.623024476484744	3.06693377676413	0.00216266764459687	0.0765396288131241
WFDC1	180.032946502173	1.06439926735947	0.347236267327545	3.06534589705007	0.00217418387836941	0.0768459570273144
ZNF541	82.4063938111406	1.42466114265761	0.464842944977804	3.06482255576803	0.00217799175562775	0.0768793883569944
ZAN	2.16798369989179	1.59220048054913	0.519649205454785	3.06399098437122	0.00218405491869931	0.0769922352048567
FBXL16	160.544333615068	1.81319167053262	0.592343320412706	3.06104856431792	0.00220563316421279	0.0776510066278952
SYT12	77.829624858593	1.45995984009773	0.477346076845949	3.05849343047788	0.00222452956612075	0.0782137607397064
AC006273.5	18.7714730593662	1.41388971368538	0.462459956726102	3.05732354363121	0.00223323083859906	0.0782998207547177
ATP4B	4.77532855502045	2.40407032897556	0.786404585007085	3.05704007175124	0.00223534390740682	0.0782998207547177
CNST	1325.83604301387	-0.46358955970233	0.151653731627455	-3.05689516985418	0.00223642474909524	0.0782998207547177
CTD.2231H16.1	19.1637701845557	2.66804206298686	0.872910294536327	3.05649054626406	0.00223944542409981	0.0782998207547177
EMID1	1671.68152444277	1.23607041275711	0.404445682039573	3.05620870155851	0.00224155171470397	0.0782998207547177
APIP	785.472855625227	0.545222177626962	0.178458198036569	3.05518145776209	0.00224924391889079	0.0784664807133043
RP11.439E19.9	14.3282323674589	-0.962518177003736	0.315333654499421	-3.0523801163301	0.00227034399159719	0.0790998447500436
RP5.855D21.3	23.7714329793295	1.19765657854734	0.392608578648389	3.05051046686356	0.00228452717386415	0.0794676287282444
CBY3	6.08191029282415	1.3527960792063	0.443509216384271	3.0502096218767	0.00228681695357505	0.0794676287282444
MARS	8832.93958677161	1.08498691509145	0.355934717024481	3.04827504369805	0.00230159163683468	0.0798777190551074
EDN2	2.23920722013674	2.42442257466452	0.795640862000119	3.04713180337407	0.00231036379550543	0.0800786997095055
RP11.379F4.7	169.342356318807	-1.34741399081561	0.442315596125882	-3.04627284820439	0.00231697475038081	0.0802043501865067
PPP1R16A	501.176430216518	0.580200417632337	0.190543487529741	3.04497637339495	0.0023269858933258	0.0804472265978347
FAM3D	10.4584118665217	1.30276450563659	0.427922964963776	3.04439025782799	0.00233152476069567	0.0805005374316287
EFNA3	124.677844334309	0.927788320975449	0.304881633477846	3.04310991249942	0.00234146794209593	0.0806077806452538
RP11.1C8.6	17.0093171118699	-0.823283477454997	0.270554508612081	-3.04294865267026	0.00234272303796428	0.0806077806452538
TPPP	62.6258169432884	1.15944265416821	0.381040671433008	3.04283175286199	0.00234363326200369	0.0806077806452538
HMGB1P5	444.986197950827	0.449465264357955	0.147812317340064	3.04078355881463	0.00235963387307836	0.0809600724503304
HS6ST1	3136.0378861019	0.584337619972235	0.192175006353536	3.04065357436365	0.00236065268665282	0.0809600724503304
ACVR2A	1056.88411909078	0.580626641975434	0.190972690999269	3.04036477119996	0.00236291775746628	0.0809600724503304
FN1	336244.617450112	-1.27662949356221	0.420074178128733	-3.0390572904269	0.00237319719094636	0.0812086916473898
RP11.609N14.4	12.5458701320811	1.44472974538432	0.475588107356178	3.03777517359645	0.00238331695528033	0.0814512214411454
ADCYAP1	362.290242525448	2.06187487520118	0.679069215884104	3.03632505637405	0.00239481034821241	0.0817041007667438
RP11.669B18.1	2.7203297268869	-0.938902332830042	0.309251728297401	-3.03604554774588	0.00239703151189972	0.0817041007667438
PPARGC1B	435.688612466303	1.07032823501931	0.35258126463044	3.0356923137739	0.00239984124432138	0.0817041007667438
RP11.16E12.2	71.437283303996	2.49992860605981	0.824284006603783	3.03284861289499	0.00242257098887347	0.0823735467128092
NHS	413.604329785377	1.34027850946442	0.442168214856262	3.03115073502087	0.00243623592384968	0.0826821432607308
RP11.419C23.1	6.07450746467079	1.94385719865183	0.641362309569771	3.03082543150342	0.00243886208449618	0.0826821432607308
NOS1AP	23.2630682758086	1.32185990835336	0.436174537831781	3.03057559234041	0.00244088078347701	0.0826821432607308
C5orf30	398.704253449464	-0.807050009928795	0.266341078592856	-3.03013719923578	0.00244442669330161	0.0826979720849721
KLHL7.AS1	20.7779623927995	1.26244348087684	0.416705607293569	3.02958121700399	0.00244893049417468	0.0827461269616608
RP11.430H10.1	12.1224560274375	1.32288231947208	0.43711266510452	3.02641040875757	0.00247476147424975	0.0835138727654481
PIANP	62.9768369476322	-1.65444052213339	0.546883918905753	-3.02521333127462	0.00248457811353712	0.0836439082770179
PLK3	1099.62846043245	-0.547947158039222	0.181128709441259	-3.02518115283609	0.0024848424839945	0.0836439082770179
PRRX1	15474.7117499944	-1.1117558506017	0.367604342679315	-3.02432730391208	0.00249186691416948	0.0837753805361961
RSPH14	14.1064867124222	1.30960064078786	0.433110535628102	3.02370996098875	0.00249695697149537	0.0838415727103857
NEURL3	17.6094101629411	-1.20748407892246	0.399430795284467	-3.02301197899002	0.00250272336214704	0.0838791479085903
PASK	564.9230575573	0.819013931984428	0.270943770755171	3.02281882953678	0.00250432122041134	0.0838791479085903
ABCB1	312.426396942641	1.10878059889262	0.367012545173967	3.02109727166696	0.00251860435325903	0.0840456722960712
AF186192.6	3.38690654993965	1.86348278639714	0.616858287105328	3.02092526817096	0.00252003548980084	0.0840456722960712
RP11.354E11.2	71.5493237042444	-1.95691615537035	0.647830106838075	-3.02072431446827	0.00252170844559364	0.0840456722960712
RP13.467H17.1	8.53883002928646	1.61149060958838	0.533480328605895	3.02071233591605	0.00252180820008314	0.0840456722960712
CTD.2245F17.3	29.0498879966877	0.752407802685472	0.249139581775149	3.02002514945428	0.00252753696984366	0.0841322157173982
RP11.758M4.4	5.61711475854786	2.27611540660749	0.753838230827472	3.01936849781291	0.00253302230387819	0.0842104518895743
KIAA1244	148.15051518417	1.40354508066938	0.465020335224816	3.01824452470629	0.00254243667911737	0.0844189543565522
AC097461.4	3.79084800613996	-1.0933474496852	0.362434586360561	-3.01667525901489	0.00255563435119068	0.0846228944427081
RP13.884E18.2	5.70286025879896	1.63599126343181	0.542398174569544	3.01621823253767	0.00255948975040437	0.0846228944427081
MEIS1.AS3	1.81733733766063	2.09741967176755	0.695501714519574	3.01569302847278	0.00256392685231236	0.0846228944427081
PYROXD2	435.060480428225	0.869299889548262	0.288262374534139	3.01565506408229	0.00256424786080455	0.0846228944427081
SSX1	8.64622116159684	-3.31997826612049	1.10091801182458	-3.01564533458602	0.00256433013462752	0.0846228944427081
RP1.56K13.5	18.938718333931	-1.5644780127201	0.518921925023352	-3.01486203854212	0.00257096170855524	0.0847376360922834
PTCH2	457.725113383658	1.2190000228498	0.404438327981662	3.01405662745464	0.002577796863543	0.084782106780143
IL1RAPL1	23.7911692987678	1.39236666953006	0.461972607904594	3.01395936838231	0.00257862338021654	0.084782106780143
SSTR2	218.047069393111	1.087359399577	0.360981969358283	3.01222634889493	0.00259339142788342	0.0851381076592181
JDP2	4727.08742702739	-0.71414036277468	0.237102665806518	-3.01194573391021	0.00259578996995383	0.0851381076592181
CSRNP3	499.456574658743	1.52448466386858	0.506246553560355	3.01134823170075	0.00260090384771861	0.085201803850509
FREM1	1506.66981341124	1.70571031068762	0.566605517536611	3.01040187201743	0.00260902236365566	0.0853636525365631
AC005014.5	3.52684732513647	1.53143027604304	0.508810637524935	3.00982362218792	0.00261399437965133	0.085422283486854
DNMT1	5128.90537302677	0.684775047717841	0.227645796201747	3.00807244914363	0.00262910452943534	0.0858116717736233
CTC.523E23.1	42.3376864392125	1.38659997889741	0.461090144012628	3.00722103237894	0.00263647986333476	0.0859479637001195
KLHL40	3.0342814365438	2.74539898536654	0.913468439671928	3.00546670923031	0.00265173622134053	0.0862461022531275
ZNF724P	51.0480217343346	1.17057898614688	0.389487880192902	3.00543109471628	0.0026520467746662	0.0862461022531275
AC010524.2	26.1359085315494	1.00757939218901	0.335345558582466	3.00460037833253	0.00265929993680857	0.0863499474428045
BCL2L15	11.6164347140056	0.874148025692371	0.291009226192328	3.00384986802668	0.0026658683870679	0.0863499474428045
PNPLA3	42.8039063622226	1.6306253336723	0.5428958391037	3.00356940728151	0.00266832677703127	0.0863499474428045
MMP1	1158.34486265759	-2.04377791038619	0.680604283753607	-3.00288722708962	0.00267431510642608	0.0863499474428045
ORMDL2	1097.14269053123	0.859773080466318	0.286318543406335	3.00285503774079	0.00267459797489742	0.0863499474428045
IKZF4	712.133258154279	0.869247739496062	0.289511771564312	3.00246078008945	0.002678064789094	0.0863499474428045
MRS2	797.299867205044	0.414233582145095	0.137976226476216	3.00220982066428	0.00268027368171569	0.0863499474428045
RP11.600F24.7	84.5006773954953	1.22950890958625	0.409545216140555	3.00213227045554	0.00268095659918468	0.0863499474428045
PCSK4	82.4517926215875	0.802912590261833	0.267515883557279	3.00136417914759	0.0026877291057092	0.0864644062725275
FAM201A	2.75489537714931	2.28920164027857	0.762834174601963	3.00091647240771	0.0026916838878148	0.0864880533426809
IGLV1.47	1425.14311786852	2.92701586353739	0.975766546882686	2.99970917520018	0.00270237497093019	0.0866579619810093
MYLK4	80.699529276529	1.04008417623069	0.346766248019971	2.99938123208227	0.0027052857278032	0.0866579619810093
BCAP31	10848.9266347521	0.637852159533015	0.212685002328904	2.99904625407774	0.00270826188226449	0.0866579619810093
ARHGAP22	805.09627347351	-1.28689910189154	0.429152913942074	-2.99869594282947	0.00271137746682884	0.0866579619810093
SLC6A8	2180.65470241475	1.26466597390923	0.421867800063314	2.99777791459654	0.00271955773335328	0.0866579619810093
FRMD6	3990.6169602692	-0.854932177082876	0.285229277317972	-2.99735071070492	0.00272337209834712	0.0866579619810093
LSR	533.21040943685	0.9785537554178	0.32651241615986	2.99698788464664	0.00272661549241341	0.0866579619810093
IGHV3.15	1109.47283179251	2.92724518749622	0.976778757759814	2.99683542894574	0.00272797938524033	0.0866579619810093
ELK3	13461.9754223393	-1.20868260376071	0.403320616340658	-2.9968282175286	0.00272804391515575	0.0866579619810093
KLF17	14.6557590376003	-1.77749321930927	0.593211822355785	-2.99638873050511	0.00273197920969174	0.0866579619810093
AC011385.1	2.16511381605977	1.75041257737825	0.5841844851845	2.99633527039908	0.00273245826066246	0.0866579619810093
RP11.93B14.6	3.42498053935963	1.94470312360372	0.650172817473953	2.99105571832311	0.00278014760945407	0.0879791403305058
CACNG6	2.74457645761689	2.46446352908307	0.823960102102986	2.99099862091992	0.00278066749090162	0.0879791403305058
ZNF391	247.56623126967	0.955895808310216	0.319704141724488	2.98993877012072	0.00279033374568117	0.0881811118546914
CTD.2554C21.3	94.0853511108467	1.46293037420375	0.489403268481499	2.98921251331824	0.00279697520182167	0.0882229099997362
CES1	2061.879846125	-2.14771447591056	0.718552656256767	-2.98894514856973	0.00279942382614853	0.0882229099997362
CIDEC	48.9761363547101	2.01737485233477	0.674996810568044	2.98871760688328	0.00280150927815408	0.0882229099997362
SEPT12	1.45507283829987	2.00262476008582	0.670158989021941	2.9882830684828	0.002805495826957	0.0882449987162985
RP11.35O15.1	3.32940583238003	1.98122038700459	0.663375151079327	2.98657612330082	0.00282120590504512	0.0885898771324328
MIR600HG	145.953972270169	1.23850233288722	0.414717528718453	2.98637565842563	0.00282305616950944	0.0885898771324328
GLI1	368.639252270646	1.75560827178151	0.588408362874206	2.98365621998618	0.00284826594128104	0.0892766857814368
PITX3	20.0160380561613	1.44524349960697	0.484492085022714	2.98300745106953	0.00285431045452138	0.0893618734607849
TMEM165	3760.64977398973	-0.414543701773746	0.139001431860141	-2.98229806863319	0.00286093309963114	0.0894649417023186
ALG1L9P	14.428069318688	0.824039708401125	0.276379931251318	2.98154683182047	0.00286796178029035	0.089580452723441
GSN	89595.2892984598	-1.05335117387805	0.353384589943933	-2.98075016243684	0.00287543275475931	0.0896720199176065
LCN2	10.9864529207859	1.82221880375424	0.611375599370522	2.98052262084128	0.00287756984472403	0.0896720199176065
HIST1H3E	20.896396292073	1.30978875672542	0.439585651578348	2.97959851970275	0.00288626399093129	0.0898387292287327
SPRY4.IT1	2.82184255208658	2.06395253121215	0.692794267656223	2.97917091345843	0.00289029511331739	0.0898600779327913
PCDHA12	13.4190049006879	2.20654089630422	0.740748952800953	2.97879718622719	0.00289382251633685	0.0898657346055958
PAIP2B	156.702884173922	0.854410836465461	0.286897804303289	2.97810169213507	0.00290039735994542	0.0899659051765057
RP11.572M11.3	12.8960362322714	0.784767081288526	0.263603919461312	2.97706909249391	0.00291018417852603	0.0901653603270659
GLYCTK.AS1	2.85241535849667	1.50904960239542	0.507062435268576	2.97606270438101	0.00291975156219773	0.0903575650504096
PLXDC1	5149.18254111766	-1.07404805873982	0.361117408430414	-2.97423506501151	0.00293719973178008	0.0907929334811006
MAG	9.69594457185122	2.16965913872245	0.729712808952821	2.97330554171857	0.00294611019195904	0.0909636919269008
RP11.973D8.5	6.86962109841268	1.67317634501568	0.562876357298037	2.97254685389059	0.00295340128991194	0.0910841164748731
RP11.531A24.7	1.65428919699548	2.66011406751865	0.895052225941242	2.97202106248187	0.00295846387553902	0.0910855247917157
DMBT1	16.0867675421997	1.81597630440446	0.611075313094127	2.97177167116999	0.0029608679088105	0.0910855247917157
TYK2	5212.18711310441	0.440465664931974	0.148230750197904	2.97148644491042	0.0029636195617586	0.0910855247917157
UHRF1BP1L	1506.99594285394	-0.841066360185252	0.283110038976092	-2.97081079578488	0.00297014703962245	0.0911818168895294
AARD	76.8837068607518	1.83172567134375	0.617112148948342	2.96822169919245	0.0029952820509242	0.0918484776848469
TBR1	6.56890697103772	2.31366618983645	0.77957366321894	2.96786089499622	0.0029988001103481	0.0918515034939231
TCL6	6.96657510143543	1.85363953168512	0.624675071943416	2.96736593941278	0.00300363235967387	0.0918947294368558
C17orf58	2953.27864610489	-1.24908381920293	0.421578319776708	-2.96287489324525	0.00304780416102602	0.0931241831655057
ANKMY1	404.688231207782	0.41725383054557	0.140841496642486	2.96257736883281	0.00305075129125326	0.0931241831655057
CBLB	2394.21398180323	-0.511840802906818	0.172792319507587	-2.9621733440782	0.00305475752255273	0.0931406317489347
HRC	619.36344413271	-1.4946574527371	0.504672353353787	-2.96163925526017	0.00306006080748318	0.0931965458170218
MAP7	277.586381661725	0.767744164883421	0.259310449690841	2.96071433217888	0.00306926478289891	0.0933709972799894
CTD.2014B16.2	2.54735103246713	-1.15511031724412	0.390576753554276	-2.95744768917384	0.00310197377456668	0.0942592981135861
CNKSR1	64.3922150831327	0.984501909614304	0.333117594918367	2.95541852076461	0.00312245160708998	0.0946876522527589
ACSL3	3956.79562442349	-0.552582084224157	0.186976711773673	-2.95535245529953	0.00312312038924668	0.0946876522527589
KIAA1549	804.760659203873	1.21554210802345	0.411450470853184	2.95428537365116	0.00313394058511056	0.0949085817330776
SLC38A4	89.840487525656	1.69056045216981	0.572466410331178	2.95311728629074	0.00314582414910688	0.0951611805104831
GBP5	1266.48353318777	-1.43552228134613	0.486244678751863	-2.95226322071217	0.00315453898628723	0.0953174648477477
DLX5	239.529842974761	1.40108358714718	0.474649940141245	2.95182505812653	0.00315901850876127	0.0953455676206126
CXCL9	3680.28682604088	-1.77801501361274	0.602536160537916	-2.95088515853623	0.00316864706695338	0.0954586247889079
LETM1P2	3.56678516841977	1.76622200173899	0.598563938933179	2.95076580270928	0.00316987168906656	0.0954586247889079
TMPRSS5	21.5592238823798	1.01627354207482	0.344466172846918	2.95028546250448	0.00317480446835775	0.0955001093270167
PLEKHG3	1587.86187382874	0.665010929321114	0.225634632993698	2.94729102752453	0.00320571343436177	0.0961929852975379
MYL10	1.25755287519475	1.84525877606936	0.626131406618175	2.94707909005215	0.00320791143921924	0.0961929852975379
CBLN1	211.888973641441	1.62270211574411	0.550625763426042	2.94701451244766	0.00320858144689874	0.0961929852975379
MEAF6	2597.0623968657	-0.249640278740561	0.0847198205476139	-2.94665731262095	0.00321228978232723	0.096196798364408
RP13.685P2.7	1.87348106267999	2.19016266887423	0.743735850868647	2.94481255181692	0.00323150374991531	0.0965526016328996
IGSF9B	97.7125976074516	1.41930280117826	0.482014592952736	2.94452247282362	0.00323453455585777	0.0965526016328996
CTC.366B18.4	61.9026846353081	-0.523389735223559	0.177759662084458	-2.94436729394143	0.00323615696042498	0.0965526016328996
MRPL4	2403.51129354902	0.473495628822109	0.160826538072671	2.94413866328551	0.00323854865874628	0.0965526016328996
MARK2	1824.20280593302	0.251016000230588	0.0852776629163541	2.94351406507002	0.00324509077388291	0.0965723827254594
C5orf15	5062.33753705334	-0.474727756330892	0.161286109351448	-2.94338897652025	0.00324640241237026	0.0965723827254594
FGF13.AS1	6.52101522180038	2.01277835731021	0.68424583684906	2.94160117448287	0.00326520159261414	0.09702416502301
RP11.1060J15.9	28.1583741771653	-0.829466118718061	0.282043019447921	-2.94092057425027	0.00327238429819055	0.0971301514010989
TMC4	111.495339618804	0.689224730853083	0.23440804326258	2.94027765114282	0.00327918259656141	0.0972245065218904
RP11.298I3.4	26.9785884471525	1.00639838382419	0.342368387142605	2.93951901407591	0.00328722100588206	0.09735538110254
TOM1L1	199.519981668413	1.34654928255059	0.458199606832468	2.93878314706397	0.00329503529264522	0.0973916122327251
SNCA	287.918921593216	1.0128013919291	0.344640195109826	2.93872103805636	0.00329569561162784	0.0973916122327251
ZNF696	279.48541340454	0.522664158110991	0.177885354817198	2.93820791851078	0.00330115551360329	0.0973987358779514
MS4A15	5.88498959980805	1.8771166512302	0.638905973840804	2.93801706054782	0.00330318845896857	0.0973987358779514
LL22NC03.2H8.5	56.5727698360301	0.98657922989805	0.336269817369366	2.93389171117422	0.0033474097320389	0.0984553715607559
ABCA8	4508.09501192545	-1.25249220026413	0.426932855412026	-2.93369831903748	0.0033494959482254	0.0984553715607559
REL	208.613229308002	0.594940782571615	0.202798838505287	2.93364985202371	0.00335001897128028	0.0984553715607559
PIM2	1688.84152334068	1.43315618265855	0.488627448377015	2.93302430597955	0.00335677611653178	0.0985461421227067
CCL8	580.552523141478	-1.27282223616216	0.434073858209531	-2.93227111490265	0.00336492855010007	0.0986776317825198
AC195454.1	3.55589865728367	-1.78486349497919	0.608923982224358	-2.93117621752917	0.00337681172011018	0.0988549682500423
OVOL1	1.21624690738556	2.02268977391515	0.690093794034732	2.93103602930437	0.00337833597101998	0.0988549682500423
CA8	144.289835598194	1.17839346379568	0.402124561083859	2.930419023945	0.00338505205040963	0.0989437085724739
MYO15A	57.4143603420725	0.886364216747601	0.302571224986696	2.92943989233138	0.00339573481552318	0.0991038508949989
DIRAS3	419.02878336683	1.40214879874486	0.478673090515048	2.92924090893883	0.00339790956273896	0.0991038508949989
FABP7	1.77034284204288	2.08570123925475	0.712458666274491	2.92746981401891	0.00341732231744329	0.0995619436997415
UPK1A.AS1	1.11927512703655	2.53726395895601	0.866923429777275	2.9267451678032	0.00342529414075661	0.0996860793163641
RP1.12G14.9	2.19170326800494	1.62050712449111	0.553783376238194	2.92624732706693	0.00343078068614157	0.0997376956614013
TSPEAR.AS1	42.848504229044	1.76844325790237	0.604698339428234	2.92450490202189	0.00345004645763419	0.0999896535320981
FCRL5	275.944304151635	2.50147853696513	0.855368937373149	2.9244439769431	0.00345072187677438	0.0999896535320981
IGHV2.26	587.136642413614	3.78995890021868	1.29599774791882	2.92435608495832	0.0034516964647311	0.0999896535320981
ZBED9	69.6397872418263	2.36398374618592	0.808471256520388	2.92401705950606	0.00345545808698128	0.0999896535320981
RP13.349O20.2	7.11570550629542	1.31153252371238	0.448597102416588	2.92363128662037	0.00345974292870435	0.0999896535320981
EMP1	16412.655802837	-0.666227650513158	0.227891063942248	-2.92344789211214	0.0034617816165904	0.0999896535320981
FOSL1	559.107118396869	-1.15451198377854	0.394984258002168	-2.92293163686589	0.00346752639211855	0.100048006385702
CLUH	3399.06003429157	0.478213886308833	0.163635355903205	2.92243619155086	0.00347304775692781	0.10009979489978
RP11.474P2.4	3.95812775196318	1.77081517723936	0.606109692793342	2.92160841229631	0.00348229058783686	0.100258617117335
RP5.1198O20.4	71.7652106420956	-1.1034876355584	0.37775269212968	-2.92119065872754	0.00348696364169656	0.100285671673718
RP13.991F5.2	1.74212657755623	1.89271749819918	0.648063507212655	2.92057410598511	0.0034938709200618	0.100307271626414
RP1.102D24.5	4.71280111808364	1.04072548554168	0.356378987241039	2.92027735304657	0.0034971998981951	0.100307271626414
DEGS1	4527.66831317728	-0.440374967526454	0.150806921791545	-2.92012437025384	0.00349891718836831	0.100307271626414
SLC17A8	30.4924161268196	2.61905736832202	0.897082658999401	2.91952736132843	0.00350562618414816	0.100338077284994
JUN	29129.6296774745	-0.978274009915767	0.335101728249232	-2.91933442130198	0.00350779688413754	0.100338077284994
PLA2G6	464.697897676466	0.735940304206821	0.252117898297005	2.91903236215247	0.00351119770113522	0.100338077284994
UNC5D	68.0267975196361	2.45865075557281	0.842757451377366	2.91738833225918	0.00352976012726909	0.100546635453307
RP11.582E3.6	376.870693214114	-0.539760728656422	0.185024197548326	-2.91724399191323	0.00353139410257471	0.100546635453307
TRIM5	1074.34499608383	0.471683945353853	0.161697786480024	2.91707113388422	0.00353335181203933	0.100546635453307
RP11.134G8.5	43.6316005750817	0.800606099212288	0.274456426725876	2.91706085648315	0.00353346824018768	0.100546635453307
GNPNAT1	987.366233924434	-0.551662136087361	0.189172200769343	-2.9161902956344	0.00354334312026478	0.100718734482933
KBTBD8	152.645150752052	0.935532603192201	0.320841986838908	2.91586712951608	0.00354701521930067	0.100718734482933
KCNJ1	8.77082857822755	1.16224435065198	0.398740555232061	2.91478841417466	0.00355929761650463	0.100745976981948
IGLON5	239.151351677121	1.92487805546796	0.660425337226487	2.91460358494368	0.00356140598536397	0.100745976981948
IGFBPL1	8.772536485677	1.79718104301873	0.616624908577916	2.91454499813097	0.00356207452916058	0.100745976981948
POLA1	976.844077732185	0.509437999756563	0.174796345791144	2.91446596009087	0.00356297662619501	0.100745976981948
TRIM45	239.638890554576	0.742514134706225	0.25487669358393	2.9132288412307	0.00357712353644103	0.101039634527738
HMP19	8.20186140925813	1.4593806303193	0.501147782643648	2.91207639914276	0.00359034808634015	0.101132019591612
RP11.286B14.1	3.41012696752983	2.686850434265	0.922701795932721	2.91193801302725	0.00359193908735291	0.101132019591612
COL9A1	170.972812911211	-1.910682762454	0.656191352524743	-2.91177680885692	0.00359379323215179	0.101132019591612
FLJ35934	15.304730792561	1.44095500153588	0.494895904623437	2.91163250306606	0.00359545375288474	0.101132019591612
AC104654.2	59.3201914421075	1.31428756498816	0.45159978447393	2.91029271973452	0.00361090393407563	0.101460357193661
ST8SIA5	28.5286126285595	1.3593664518841	0.467409636572087	2.90829787304663	0.00363402011400878	0.102003185269074
ZNF33A	1242.52758197895	0.444269950996013	0.152802218540874	2.90748364283188	0.00364349398576844	0.10213403736077
PRLR	176.314743124152	1.16623289926341	0.401189604628838	2.90693698392897	0.00364986716135179	0.10213403736077
AC007743.1	60.7112041663075	1.15984701933619	0.398995434978172	2.90691801874787	0.00365008844711263	0.10213403736077
CHPT1	2352.42774352052	-0.713774236079733	0.245610768276554	-2.90611947142331	0.00365941697733666	0.102202840695613
STMND1	3.73066960979278	1.81543071933881	0.624782016737384	2.9057025821886	0.00366429563354959	0.102202840695613
TRIM66	277.463573779315	0.642968333259072	0.221285629947655	2.90560364634235	0.0036654543006146	0.102202840695613
KB.1742H10.3	17.0899580624602	-0.867065196614423	0.298431648673848	-2.90540631487121	0.0036677663029771	0.102202840695613
KIR2DL4	18.4367933773987	-1.18754507919366	0.408837037965539	-2.90469054639263	0.00367616362102398	0.102330681023778
SNED1	2758.80774089786	0.913472281813143	0.314519242514381	2.90434465793098	0.00368022780830316	0.102337763340207
AP000439.1	10.0882483001587	-1.68318139544884	0.579640469082701	-2.90383692172584	0.00368620110568924	0.102397863599818
CYP2B7P	14.7870561585187	1.11566899289472	0.384329497243067	2.90289712576789	0.00369728066236356	0.102599538380589
DUSP9	82.5125589994697	2.62186262027367	0.903372202247243	2.90230606360421	0.00370426438387459	0.102606080514978
IFNLR1	45.6193778463293	1.36301206416958	0.469689413028479	2.9019433403472	0.00370855609261436	0.102606080514978
PCDHA8	4.59332121896209	1.98924952514617	0.685497125886749	2.90190790015773	0.00370897566004182	0.102606080514978
RP3.425C14.4	689.582528817159	-0.838563107717235	0.289015889795848	-2.90144292173545	0.0037144844204125	0.102652757717202
PLXNA3	2847.38081807268	0.763462754277604	0.263206858024822	2.90061877569165	0.00372426664201986	0.102817318127377
PPP1R9A	193.802231775888	1.43623769419322	0.495212305532718	2.90024637543732	0.00372869453283116	0.102833873245288
CHCHD7	1351.662519505	0.840539570385841	0.289942563773778	2.89898647320252	0.00374371045083552	0.103142102697788
FLJ45079	2.9074239149911	1.85389854742188	0.6397552302601	2.89782476130465	0.00375760478958119	0.103418831821445
LOX	12211.5212387257	-1.04228590229121	0.359727745922882	-2.89742983160006	0.00376233890317845	0.103443139833346
PNPLA7	257.62943148045	0.877787896127253	0.303190153272984	2.89517283675409	0.00378949818879717	0.104083333688619
RP11.221N13.3	19.4076442092368	-1.50809693325455	0.520960153441381	-2.89484123361893	0.00379350347360943	0.104086915534317
DCAF15	2027.25606839332	0.570696139813646	0.197192092216189	2.89411270705507	0.00380231653115178	0.104222272101836
C1orf145	22.4285383753386	1.28879923464761	0.445459675988534	2.89318944927527	0.00381351199976552	0.104422588519573
TRIM8	8142.93361879146	-0.48771012332292	0.168611476695196	-2.89250846313723	0.00382178885586921	0.104454170407405
NEXN.AS1	39.6590383804804	-1.02427263961439	0.35415648123377	-2.89214709849766	0.00382618758744892	0.104454170407405
BLOC1S1	3149.2796476429	1.01901140276321	0.352368925819276	2.89188781443755	0.0038293465712742	0.104454170407405
CTC.398G3.1	2.79574369503852	0.931948380696924	0.322270959769476	2.89181619517799	0.00383021956113819	0.104454170407405
GPC2	213.65331654537	1.07972576499351	0.373511277309313	2.89074475279997	0.00384330131790346	0.104704624747995
RP11.346C4.3	23.8683855313962	2.15327488552214	0.744997332706699	2.8903122078289	0.00384859395992022	0.104742584550534
CLDN14	67.0185578317851	-1.40189352888103	0.485167959945508	-2.88950146056323	0.00385853214549361	0.104906771753289
RP11.727A23.5	40.8048106306708	0.749358363229953	0.259495312349584	2.88775298653734	0.00388004444121885	0.105384988655228
WHAMMP2	67.712744014666	1.1463515542074	0.397098447397063	2.88681953233917	0.00389157372066957	0.105591366954168
PLEKHG6	31.4261285301449	1.15128673416713	0.398939477988107	2.88586815216481	0.00390335641981389	0.105804197930415
RP11.121M22.1	7.46968012034821	1.08101408707822	0.374651797116697	2.8853834290871	0.0039093720936637	0.105860436673381
BLZF1	1315.42432519658	-0.759043154018978	0.263165630007705	-2.88427920468472	0.0039231075648589	0.106125393159355
TF	219.333440898611	1.39871837963308	0.485146781900985	2.88308287679943	0.00393803816726979	0.106422113932798
SIRT5	550.981511601792	0.343810135029412	0.11944239004684	2.87845994118658	0.00399622030453031	0.107876917914783
CLDN20	4.28294294898949	1.90021937696044	0.660218059124143	2.87816934223415	0.00399990359031808	0.107876917914783
PPP1R26.AS1	46.3518039058233	1.43819841994836	0.499980638229404	2.87650822848159	0.00402101711537363	0.108337574476596
RP11.1K3.1	5.84573951421991	-1.90562700871295	0.662563129395085	-2.87614405958988	0.00402565937108305	0.108353969965965
MORN5	1.54163272302078	1.66091269669684	0.577576470633629	2.87565851648135	0.00403185641682538	0.108412139207971
ANKRD34B	3.09689553934565	2.43779406706001	0.848252050464381	2.87390294632995	0.00405433530148775	0.108907554868564
TSPAN1	60.4436099461823	1.10829695589982	0.385776036492549	2.87290254204585	0.00406719562360101	0.109143864976194
CTC.336P14.1	9.99794956025414	-0.837389660022349	0.29154616526036	-2.87223692095052	0.00407577276710194	0.109264878313266
PDE4D	1490.77152147717	0.748666292324162	0.260767263450581	2.87101334123577	0.00409158256212984	0.10938959572972
DMGDH	103.848195907349	1.11557823543213	0.388570165509637	2.8709827322151	0.00409197877191122	0.10938959572972
DIO3	383.038940325216	1.94194346922535	0.676415810543956	2.87093151720344	0.00409264178796696	0.10938959572972
APOBEC2	6.46102323021167	1.68324071886193	0.586738144757029	2.86881078706578	0.00412018195343004	0.109891168285494
PKDCC	3355.0413401783	0.978485685014382	0.341083425562249	2.86875764602582	0.00412087420677693	0.109891168285494
KCNU1	3.31007417680132	2.0798565640936	0.725056955034779	2.86854232574575	0.00412368020369957	0.109891168285494
COLCA1	52.9017675281482	1.28252685781097	0.447344380956609	2.86697880292671	0.00414410767909188	0.110326085704426
HELB	436.478613529882	0.93803353469557	0.327414464212848	2.86497280121921	0.00417045061172036	0.110851875103896
B3GALT1	78.0543992948475	-1.41803072574619	0.495026898305042	-2.86455287702847	0.00417598427389928	0.110851875103896
IL17B	24.4061984430885	1.1125463714027	0.388428201304179	2.86422656147838	0.00418028898189162	0.110851875103896
ALDH7A1	2552.13638120023	0.456693784304446	0.159447825117887	2.86422084444733	0.00418036443601542	0.110851875103896
TCF7	856.137142273515	1.26615603069434	0.44212920519454	2.86376926884353	0.00418632829454217	0.110900543045357
DUSP13	2.88557794341822	2.66626327307976	0.931184125047285	2.86330404628018	0.00419248045638761	0.110954098541364
HCN2	258.980673381003	1.44655171106768	0.505419800708683	2.86207961983162	0.00420871164540589	0.111110015540861
NAP1L2	99.0244159226652	1.5923967302734	0.556382188647287	2.86205554880349	0.0042090313052563	0.111110015540861
HTR1B	13.7644353477858	-1.50022570975343	0.524250992912018	-2.86165544755621	0.00421434781955907	0.111110015540861
NFYC.AS1	31.6937654710019	0.999163726005893	0.349161069952522	2.86161262520405	0.00421491720036251	0.111110015540861
RP11.156P1.3	179.984536117814	0.495056718645014	0.173089015630845	2.86012787605681	0.00423470214198746	0.11152212640987
RNF212B	2.92950490073673	1.27806967234907	0.447065222353405	2.85879913812386	0.00425247954663696	0.111880612714752
MRPS10	2581.46107929613	-0.712608715408585	0.249313890670288	-2.85827922982035	0.00425945388909204	0.111954452415646
FAM43B	833.498783980216	-1.36319680743257	0.477148692747689	-2.856964355456	0.00427713866954597	0.112227725067451
RGS9BP	9.25189575852065	1.35308234775066	0.473621549661781	2.85688509890841	0.00427820677794171	0.112227725067451
REEP5	6308.8191586387	-0.398641303853213	0.139560204353695	-2.85641100698673	0.00428460097516807	0.11228580623899
RAB40A	26.155275564766	0.937982685766383	0.32841539383247	2.85608623524165	0.00428898625394427	0.112291178122272
CTD.2128A3.2	5.74139293776675	-1.64483167813111	0.575982671966541	-2.85569646134538	0.00429425460707009	0.112319637054642
BBX	3050.0360113116	0.680180266647799	0.238341782000203	2.85380205241236	0.00431994392387097	0.112803105796425
RP11.244H3.4	11.8745467688952	-0.64192987521296	0.224945391081251	-2.85371428206366	0.00432113751263945	0.112803105796425
SRPX2	2807.98997299736	-0.941673579534526	0.330217190371052	-2.8516794612552	0.0043488929898365	0.113301690227328
NUP54	1578.27404207801	-0.241370128197864	0.0846532331775004	-2.85128067928321	0.0043543513817795	0.113301690227328
MCF2L.AS1	11.4251474297727	1.10326789974686	0.386963780551322	2.85108828060082	0.00435698708989114	0.113301690227328
PLEKHG7	6.45169425122424	1.69139531082323	0.593247348549054	2.851079427426	0.0043571084061064	0.113301690227328
CSMD3	26.0055665726837	2.09952409784433	0.736858484356574	2.84929079655999	0.00438168114706538	0.113830482565252
ATP8A2	125.647027976471	1.19204242591402	0.418541932857739	2.84808362635242	0.00439833653715626	0.114152769141151
LINC01358	86.3300114576659	-1.32650925187404	0.465847197120817	-2.84752008828769	0.00440613132990073	0.114183710858151
ENSG00000213424	84.1038237077477	-1.72579967132633	0.606100305912624	-2.84738294056417	0.00440803023452841	0.114183710858151
PCDH11X	68.4956469463798	2.68987049695815	0.944994532102679	2.84644027619186	0.00442110215379324	0.114411990419262
RP5.1029K10.2	2.58653279638952	1.96385754403328	0.690110675031628	2.84571390515482	0.00443119868939219	0.114562905865691
ARNTL2	485.395308174774	-0.889978773322783	0.312787931671087	-2.84531045864852	0.00443681560568792	0.114597827692297
HS6ST1P1	20.7480304472129	1.17060251382025	0.411501027576123	2.84471346454585	0.00444513899429948	0.11470252033129
ZNF849P	3.57168991599417	2.04328178114445	0.718460974434688	2.84397045052054	0.00445551797989251	0.11482884452846
LINC00431	4.02617482729311	2.16986960509015	0.763030733020897	2.84375125560077	0.00445858405342804	0.11482884452846
MPP4	18.9907881631345	-1.31310200433099	0.46206223300457	-2.84182932630636	0.00448554976775761	0.11541267994397
PAQR9	6.36778320148685	-1.92908114608773	0.67902808524314	-2.84094456180997	0.00449801309484239	0.115539048244736
ZNF454	93.4124596079119	1.11456996762075	0.392405453124804	2.84035290219646	0.00450636506646525	0.115539048244736
NRXN3	198.8986955302	1.46565231843597	0.516014448815019	2.84033193605666	0.00450666128579037	0.115539048244736
SOCS7	688.962923169063	0.768625561111838	0.270617948606617	2.84026083661269	0.00450766594298574	0.115539048244736
KCNQ3	281.489309831818	-0.939364219447035	0.330778378856381	-2.839859795839	0.00451333657454118	0.115574115410224
CAPN12	15.3597708342275	1.0913472594932	0.384390636584435	2.83916192441767	0.00452321973854646	0.115716884396986
KIAA1324L	2830.30666897384	-1.2886295946308	0.454207167983056	-2.83709656180255	0.00455258411315338	0.116236778733
ARPC5	14154.8446725777	-0.5289442604388	0.186444499153698	-2.83700652387046	0.0045538681500886	0.116236778733
IFNGR2	6571.08987681155	-0.41881910506292	0.147636805805636	-2.83682041735782	0.00455652326728645	0.116236778733
UBL4A	2590.60826085633	0.779968582622857	0.27501611559371	2.83608319075791	0.00456705480867413	0.116394901585014
CCDC54	1.02566725263895	1.74503731469126	0.615627825193405	2.83456537095775	0.00458880685150571	0.116838416725257
C12orf56	31.8411582186636	-1.92495145859588	0.679288885409764	-2.83377440723868	0.00460017938891712	0.116935811439759
RP11.355F16.1	21.4507584906125	0.852459143031825	0.300880013785819	2.83321956917566	0.00460817211940251	0.116935811439759
RP5.875H18.10	1.62250458496288	2.33351346179787	0.823683873944463	2.83302069594142	0.00461104005200909	0.116935811439759
RP11.567M16.1	79.7403543054768	1.67630036842707	0.5917267548714	2.83289601936519	0.00461283882564239	0.116935811439759
PAM	14369.1932349258	-0.819728456447157	0.28940057158959	-2.83250462134417	0.00461848985738908	0.116935811439759
SEP15	8928.85943596837	-0.3658629714696	0.129166711961004	-2.83248652779871	0.00461875124479133	0.116935811439759
SLC41A2	730.286542292464	-0.684418276546988	0.241869444291902	-2.82970128182456	0.00465914826542093	0.117834859546525
TOP1MT	935.802961078738	0.603035484931737	0.213150814093275	2.82914933962133	0.00466719147559027	0.117834859546525
RP11.59C5.3	52.1535764060819	0.901612453168276	0.318697104505617	2.82905756099327	0.00466853014339556	0.117834859546525
RP11.20I23.13	13.8693138874384	1.81674308989408	0.642223547328123	2.82883288451875	0.00467180870437977	0.117834859546525
DUSP14	962.551543747681	-0.639759380612828	0.226264335256885	-2.82748662040126	0.00469149758612672	0.118220457934837
ZNF275	1742.01047100283	0.826723852929519	0.292467357106731	2.82672179592275	0.00470271644380294	0.118289822215812
SEPT6	3335.71699171632	0.754053913216999	0.266793856509222	2.82635411130966	0.0047081184792985	0.118289822215812
RPA4	3.39735979282377	1.21164276545431	0.428730783119361	2.82611562584482	0.00471162531900069	0.118289822215812
LGALS4	25.7484812090095	1.06661314584734	0.377415303934694	2.82609935190096	0.00471186470742755	0.118289822215812
AGBL5	838.559056240302	0.394899266330333	0.139793399970868	2.82487775826775	0.00472986571686465	0.118308953915492
DPY19L1P1	100.460241658741	0.70634770390193	0.25006171182647	2.82469354761556	0.0047325855801501	0.118308953915492
SYT3	18.7978986727699	1.72179783698814	0.60957105368118	2.82460564127883	0.00473388401279091	0.118308953915492
IGKV3.20	3767.16305781005	2.48091954911516	0.87832889510362	2.82459060944644	0.00473410607481999	0.118308953915492
RP11.495P10.3	3.91433356696365	1.50599638820737	0.533180261790819	2.824553900681	0.00473464840515056	0.118308953915492
GAL3ST1	28.2345621992259	1.55048736622879	0.548993819157877	2.82423464913893	0.00473936735597582	0.118316808472326
AC010136.2	3.48792127281045	1.5563233735513	0.551161374403788	2.82371633033036	0.0047470378456461	0.118398264261602
RP11.108M9.6	2.72701805055155	1.2890446715595	0.456642247047249	2.8228765075828	0.004759490058823	0.118550898135981
TIPRL	2771.89062738911	-0.509330134822243	0.180440215028848	-2.82270853390866	0.00476198418169621	0.118550898135981
MYLK3	19.3232240284156	0.905518401669151	0.321387022243074	2.81753256665193	0.00483942065957641	0.120367146071798
EXOC2	1643.54849770148	0.499850807971818	0.177499111166716	2.81607499150987	0.00486143176171255	0.12080275669114
HSPD1P6	30.4159920461163	-1.22056765055178	0.433667680477925	-2.81452297576487	0.00488496855819937	0.121035142901732
ALDH3A1	19.5969491868098	1.21554903267739	0.431910068406741	2.81435678765579	0.00488749495239104	0.121035142901732
CS	6487.52395140708	0.761203118126296	0.270473417026657	2.81433616099609	0.00488780860162962	0.121035142901732
USP43	35.7338510646456	1.70083566965683	0.604406657606847	2.81405846254457	0.0048920330607468	0.121035142901732
DDR2	10122.1910088235	-0.711376984549243	0.252816135588612	-2.81381163782525	0.00489579062851501	0.121035142901732
ZNF727	23.9028255459965	1.29752164483314	0.461147797443053	2.81367850400148	0.00489781849207738	0.121035142901732
TTYH1	51.3986502777162	1.05589516311477	0.375385254788879	2.81283068432887	0.00491075012031012	0.121243170709348
CTC.332L22.1	34.8715220729087	-0.827799399504547	0.294378017109269	-2.81202858703026	0.0049230127760491	0.121333021165836
RP11.368J22.2	2.59664210332755	1.90111995214428	0.676073524976274	2.81200177482323	0.0049234231654665	0.121333021165836
BRPF3	1550.73521929146	0.588016922312454	0.209209930069943	2.81065493457155	0.00494407785075027	0.121647864648362
CACNA1S	6.45497503470643	1.92186341547582	0.683831434293759	2.81043444202103	0.0049474667048775	0.121647864648362
IGLV2.23	1702.28115883458	2.57771773009852	0.91724466342828	2.81028370387469	0.00494978467949743	0.121647864648362
TAF9	839.047657520662	-0.31731355002707	0.113021231825705	-2.8075569952769	0.00499188454456569	0.122473599358441
ACTA2	24436.4049668316	1.16568297106795	0.415200658650013	2.80751715293048	0.00499250209580423	0.122473599358441
RAP1A	4791.01416182567	-0.408449615463916	0.145528758741193	-2.80665910296328	0.00500581853516341	0.122688227638284
RP11.10L12.4	76.4654707605888	-0.471073014554155	0.167885690366327	-2.8059152243784	0.00501738908210556	0.122773665560592
C12orf75	1331.72124312935	-0.949199228110732	0.338293249664713	-2.80584737960777	0.0050184455656887	0.122773665560592
HIST1H4C	2.46008023004397	1.1652263725172	0.41547225081644	2.80458290590389	0.00503817288370796	0.123144131030176
DCUN1D2	601.176222302739	0.521642560921157	0.186048501028395	2.80379878385338	0.00505044132676972	0.123331777199717
CCDC169	47.3115907892218	1.19174283270773	0.425142570389205	2.80316043537283	0.00506044892017172	0.123371205691256
LA16c.444G7.2	1.49384733662373	2.49717887518948	0.890860129632953	2.8031099295221	0.00506124148134033	0.123371205691256
CTC1	744.200623568591	0.591825785569492	0.211189653734881	2.80234270525604	0.00507329492696292	0.123552899662809
ECM1	13700.1272052185	-1.34647797737683	0.480571481725389	-2.8018266347029	0.00508141722368362	0.12363861364365
ATP2A3	2027.46838542359	1.06680666905858	0.38092886322897	2.8005403949066	0.00510171219083476	0.124020084045433
AC003956.1	2.9302673680293	1.74535550188799	0.623718794920763	2.79830512740877	0.0051371557787068	0.124595440254713
MUC5B	5.65688722026535	2.12541238414414	0.759566562997837	2.79819108381446	0.00513897006688463	0.124595440254713
C1orf226	141.436717410318	1.25228525561747	0.447537127748712	2.7981706499234	0.00513929520520518	0.124595440254713
UBE2D3	10084.3121666919	-0.273912297079289	0.0979294000102783	-2.79703844862258	0.00515733955266199	0.12482964795277
LINC01585	4.72718665767713	1.51017038213751	0.539928642375708	2.79698142238333	0.00515824991540371	0.12482964795277
FAM58A	1106.68585131916	0.749362165171421	0.26812289957596	2.79484582016884	0.00519244723982057	0.125544120392493
CTB.12O2.1	4.17694338346827	1.39714221582203	0.500042028252448	2.7940495736024	0.00520524984598273	0.125644173489577
RPL10	76900.7863281843	0.732973046204549	0.262361152949605	2.79375600375312	0.00520997725782627	0.125644173489577
CPT1A	4386.56529540162	0.756714590365968	0.270863079933997	2.79371625896878	0.005210617573799	0.125644173489577
CXCL1	601.038493115817	-1.77854806461905	0.636967822987109	-2.7922102191574	0.00523493337285206	0.126117291714397
AC011239.2	16.5797571270958	1.23556691296288	0.442592309565996	2.79165924544525	0.00524385471193965	0.126146173260186
RP11.287D1.3	3.26337244875034	1.18905476854238	0.42594691758697	2.79155622319911	0.00524552436645177	0.126146173260186
ADRB1	35.8775565911467	1.20793660684128	0.432805406753795	2.79094620351733	0.00525542064029155	0.126271117387756
PCDHA1	26.1934374036545	1.71251744247789	0.613833406380257	2.78987331852222	0.00527286684643158	0.126577077058843
RGS12	2322.29751516656	0.594269557734353	0.213053878024523	2.78929237639106	0.0052823353763648	0.126691154357064
IGFL3	4.07613258662479	-2.64945411102717	0.950002116498567	-2.78889285088363	0.00528885598356376	0.12673438843041
RP11.467P9.1	4.03551710763517	1.40214416872599	0.502854802580043	2.78836785794206	0.00529743538300867	0.126780176513325
FATE1	84.6215271286976	-1.38793163166485	0.497787960963056	-2.78819847105112	0.00530020617319873	0.126780176513325
GCLC	1374.97546415197	0.739719495462925	0.265348392857018	2.78772932256469	0.00530788722649003	0.126823169253125
IDH3G	3546.72727949913	0.61265674713474	0.2197862151947	2.78751215854012	0.00531144611010967	0.126823169253125
ZNF888	8.085490477344	0.974529569739566	0.349896828706226	2.7851912043415	0.00534961672560607	0.127518022688221
AC021087.1	6.06222106811276	1.88046332334469	0.675171132657432	2.78516546752125	0.00535004138074697	0.127518022688221
IGLL3P	6.90474061309449	1.97530087329803	0.709683817290512	2.78335341059275	0.0053800167842683	0.128092143163141
RP11.196G11.1	8.3197587183471	-1.00849460301759	0.362383223229955	-2.78295058482228	0.00538670097608982	0.128092143163141
CTD.2083E4.7	1.93950536423407	2.38567628577399	0.857279243778485	2.78284619986721	0.00538843428539758	0.128092143163141
HCFC1	4887.46391709548	0.421484220602058	0.151531784671874	2.78149050718789	0.00541099131147183	0.128514631837981
COL4A5	1370.75475487174	1.65837810137795	0.596453131199402	2.7803996904889	0.00542920299098252	0.128617256735151
XAB2	4169.17102505612	0.549739225166137	0.197724210923724	2.78033338759009	0.00543031172985852	0.128617256735151
CALY	6.5950669222212	1.79336470441436	0.645022542846901	2.78031322207606	0.00543064898475244	0.128617256735151
RAVER1	1249.9525457267	0.732912211937254	0.263629410798106	2.78008515710919	0.00543446453705592	0.128617256735151
BCO1	6.20317564056085	1.73233931926997	0.623327250069104	2.77918111084974	0.00544961315385948	0.128862243432195
HAP1	16.9874761327763	1.35769084977097	0.488572260404088	2.77889466882145	0.00545442085504042	0.128862491651799
CLCNKB	21.1907132000978	1.48608158291678	0.535027676181897	2.77757889745416	0.005476554252922	0.129271705045686
ZNF561	1484.5420547282	0.488161251853708	0.175839781460248	2.77617071518066	0.00550033193328559	0.129608453366431
BRINP2	20.5739994467926	1.84962941308425	0.666305239402386	2.7759490751464	0.0055040828827142	0.129608453366431
AKR1D1	1.48185310076421	1.60150933364932	0.576938052315293	2.77587745724581	0.00550529540954126	0.129608453366431
KCNA1	304.82160091338	-2.34055785308304	0.84379692244944	-2.77384023431691	0.0055398877349683	0.130308637772958
RP11.295K2.3	6.09620095528141	1.26003211648258	0.454351510477413	2.77325393979342	0.00554987938037303	0.13042944874504
PC	1172.6430671803	0.717129258841509	0.258650608392121	2.77257905287554	0.00556140095087475	0.130585972327271
URB1	2202.6984043336	0.66804510494177	0.240996347953883	2.77201339611008	0.00557107438164169	0.130698864663458
SIGLEC17P	36.603707547923	-1.09064060124958	0.393567260658311	-2.77116699042823	0.00558557732357976	0.130924762710296
ZNF714	287.598272810865	0.785606809538634	0.283544818983583	2.77066183876955	0.00559424919025365	0.131013706842714
RPE65	17.6290752075991	1.7479006017807	0.631567760255872	2.76755830771438	0.00564779415785849	0.132152479676302
MEI4	6.08096021357181	-1.7026184639931	0.615276858635174	-2.76723956069126	0.00565331957089429	0.132166640829732
ZNF436.AS1	149.810140892325	0.681365776213982	0.246501453237057	2.76414506797541	0.00570721596515182	0.13329205806915
FTH1P4	12.8309625051574	-0.765169528515803	0.276843448627246	-2.7639069384158	0.00571138257901839	0.13329205806915
SWSAP1	138.793216830981	0.542180670720635	0.196224695661808	2.76306032169916	0.00572621827299416	0.133522287542682
UGDH	5011.81717081036	-0.668323123233127	0.242082394420924	-2.76072584638712	0.00576730667481992	0.134283717057508
RN7SL809P	2.30580595551312	1.80824565510003	0.655010230341176	2.76063727150974	0.00576887087649334	0.134283717057508
RP11.258F1.1	4.1056518859968	1.07415577812872	0.389187468509571	2.75999579904845	0.00578021047993578	0.134431180876221
RP11.752G15.8	2.89220198477442	1.62748598093991	0.589773828141591	2.75950865108445	0.00578883544097189	0.134435173495763
SLC34A3	4.37191280042658	1.45923155398716	0.528863559517486	2.75918339943577	0.00579460048401112	0.134435173495763
IGSF9	103.47009947936	1.38249862526973	0.50106169315755	2.75913853353589	0.00579539613238382	0.134435173495763
RP11.159D12.6	48.3197727914509	0.714571503009347	0.259071964546142	2.75819695219117	0.00581211680403237	0.134706714055149
RP11.145M4.3	26.141395804139	-1.39172667153401	0.504635370904613	-2.75788569683331	0.00581765365743636	0.134718803919013
HIST1H2AI	8.06131077226261	1.25854003030014	0.456446759226502	2.75725482733818	0.00582889064615034	0.134862756707055
KRT7	179.521521738819	1.43462090327357	0.520365837192069	2.7569467492618	0.00583438521180293	0.134873713906584
ITIH5	3491.97343794654	1.33192779291005	0.483178682050544	2.75659469755066	0.0058406697624424	0.134893270002987
FAM3C	2460.91210518206	-0.487527277278479	0.176875064532491	-2.75633695776786	0.0058452745991913	0.134893270002987
RP11.82L18.2	38.1525515430528	-1.22602657465784	0.445333830239851	-2.7530506137329	0.00590427673691172	0.135929588152092
FAM86GP	35.1462972769155	1.31870453839117	0.479014401889475	2.75295384270188	0.00590602224503058	0.135929588152092
RP11.731J8.2	6.22116661826471	-1.65302965033537	0.600508234686156	-2.75271770619314	0.00591028351114776	0.135929588152092
TMEM59	14569.5245509544	-0.398116012217754	0.144626934253087	-2.75271002786437	0.00591042211903968	0.135929588152092
FOXO3B	63.3009648877771	0.944300744066695	0.343201918244306	2.75144366586699	0.00593332239819856	0.13631834612589
ZNF43	957.186939709781	0.757236474027528	0.27523716513903	2.7512144795018	0.00593747542875776	0.13631834612589
NMD3P1	4.89239501331188	1.20167417238474	0.436891353520988	2.7505103104015	0.00595025190072156	0.136495018409208
RP11.420A23.1	39.2796681768652	0.976008106201097	0.354912855056026	2.74999367393167	0.00595964152410543	0.136533806790048
ZNF204P	97.9462620687739	1.11316413829004	0.404807852767101	2.74985806397011	0.00596210838227704	0.136533806790048
RP3.333A15.2	21.5124238301882	1.73034166313881	0.62952114413886	2.74866329629927	0.00598388199740454	0.136694174450767
ALDH1L1.AS2	8.86242508034149	2.15633447521201	0.784562522329018	2.74845460220405	0.00598769261026143	0.136694174450767
BRIX1	1678.92493488044	-0.505565869459861	0.183947892107024	-2.74841893358427	0.0059883441138454	0.136694174450767
LINC00086	195.89978367341	1.18862207915708	0.432484521022623	2.74835750501902	0.00598946628428829	0.136694174450767
LRG1	128.756064173417	-1.06628386610174	0.388065792320904	-2.74768837450118	0.0060017021673079	0.136857150779478
KCNE5	30.5781786594783	1.51308694304566	0.550844873019472	2.74684764651005	0.00601710784699113	0.137092070386663
RAB11B	7144.19641877003	0.39710093086503	0.144606275625307	2.74608366163838	0.00603113815713267	0.137295282353303
SEC14L5	23.4659073321035	1.36738724635537	0.498134584793718	2.74501568069524	0.00605080064468867	0.137626254799007
LINC01426	215.66701986378	-1.29172081537042	0.470703811293949	-2.7442327518435	0.00606525173109523	0.137838233503113
CTC.296K1.3	8.09618010507863	1.46218899602209	0.533149816759116	2.74254806071278	0.00609645277270756	0.138051559856422
MYRFL	1939.14372402013	-1.94467809071192	0.709166964653218	-2.7422006207845	0.00610290542948554	0.138051559856422
KCNH8	19.7872739928915	2.03178041829497	0.740937384246838	2.74217560281463	0.00610337030072738	0.138051559856422
RP11.356M20.1	2.28628921192053	1.763333799386	0.643049925706652	2.74214136242729	0.00610400658995373	0.138051559856422
CASC15	347.058963766982	1.24056653486796	0.452421153765967	2.74206129519242	0.0061054947128401	0.138051559856422
RP11.148K1.10	2.95190040932921	1.22784950889058	0.447861767724094	2.74158143734877	0.00611442015982355	0.138051559856422
PDZD7	87.4571820577145	1.00525761126032	0.366676549493973	2.74153777395259	0.00611523289029112	0.138051559856422
ADORA1	155.596087964225	1.4141121004255	0.515815074571561	2.74150983586524	0.0061157529681015	0.138051559856422
CALCB	5.93362401762923	1.18098561847846	0.430903530132789	2.74071929305041	0.00613048573576988	0.138267932690387
TMEM151B	10.2390991738816	1.67426448334586	0.611095596529509	2.73977507423425	0.00614812433275604	0.138549426028937
RP11.277P12.20	50.2540265858569	1.13480426542094	0.414314556988872	2.7389920201414	0.00616278692466012	0.138760952598044
SDHA	7311.3782003896	0.782943064614507	0.285878939544298	2.73872243216848	0.00616784220840088	0.138760952598044
SFTPD	15.2166012071822	1.51891052637381	0.554765443029196	2.73793284253626	0.00618266999730739	0.138978143487591
LINC00461	18.0719802876925	2.79603179468976	1.02173956220834	2.73654060007871	0.0062088932819389	0.139243110080082
BCL10	1018.26131554235	-0.409926315014123	0.14981471219025	-2.73622202399959	0.0062149078145695	0.139243110080082
PTPRU	1425.09494966101	1.08911830485956	0.398092770927403	2.73584044825112	0.00622211864851345	0.139243110080082
ADCK4	1276.48442966232	0.370507193023314	0.135444917353906	2.73548244010671	0.00622889096128556	0.139243110080082
RAB25	7.65384414581952	1.2509819486431	0.457331827154766	2.73539227835056	0.00623059756493263	0.139243110080082
S100A2	156.751492541746	1.38326717046127	0.505720469001661	2.73524062253593	0.00623346909263128	0.139243110080082
CCDC85A	98.2010539191008	1.2584756243372	0.460102825130801	2.73520516632218	0.0062341406102848	0.139243110080082
ECHDC1	3484.52075752963	-0.499100858334566	0.182479204739741	-2.7351108804228	0.00623592664084351	0.139243110080082
FMO2	624.8633749578	1.68613232750931	0.616561662913227	2.73473429979802	0.00624306469395599	0.139286714127114
KIAA1045	36.3027541520893	1.17156546746005	0.428557991597897	2.73373846814015	0.00626197605468652	0.13955156546475
TUBA4A	979.555841493148	1.08246918766206	0.395992134063531	2.73356234770156	0.00626532603493739	0.13955156546475
AC004540.4	108.835900441602	-1.69688744168713	0.620952859599536	-2.73271539933239	0.0062814583519062	0.139651316436398
RP11.54O7.16	8.34685231085134	1.52949968890933	0.559723005152819	2.73260108094312	0.0062836387022368	0.139651316436398
CTD.2240E14.4	6.96711940037973	1.09083455553647	0.399206250437573	2.73250870781907	0.00628540099663486	0.139651316436398
ARHGAP10	1743.36762885268	-0.528402373387098	0.193448402512986	-2.73148998142607	0.00630486578696033	0.139968020470519
NRXN1	79.6110059511364	2.27583551295146	0.833607055988487	2.73010586535017	0.00633139900651771	0.140440991009974
USP2	222.694387332491	0.943403314027527	0.345639682585644	2.72944155882265	0.00634416928129442	0.140608147882946
ZKSCAN8	1471.92182961563	0.519336423320072	0.190296114649213	2.72909630486888	0.00635081540957953	0.14063940934223
EPPK1	19.3621635326211	1.16219621931987	0.42600861740831	2.72810495334643	0.00636993373652641	0.140939350466846
ELF3	41.3969651740085	1.52643070610195	0.559572757065105	2.72785028725827	0.00637485335482161	0.140939350466846
PIN1	3120.90513938336	0.545733742797533	0.200173115336733	2.72630888458469	0.00640470308672901	0.141449908864588
RP11.53O19.3	536.071787242797	-0.44567542001362	0.163483755036458	-2.72611440760112	0.00640847811362535	0.141449908864588
BTN2A3P	260.617202676843	0.525482544703203	0.192937248524984	2.72359302685483	0.00645760263881197	0.142417177408676
CLEC4G	1068.12685151996	1.68532920318854	0.61886408791502	2.72326224141797	0.00646407246714634	0.142442916006961
IL1B	159.08527536146	-1.14531270774261	0.420702767474416	-2.72237978042837	0.00648136104960449	0.142706820093833
SULT1E1	138.482777772817	2.77787897097934	1.02055041470006	2.72194193541705	0.00648995444406963	0.142757108574044
WNT7A	2.38126471534113	2.02528478316832	0.744118887763589	2.72172204801199	0.00649427394376747	0.142757108574044
CTD.2291D10.4	20.4451849887708	1.48328504831778	0.54518980102998	2.72067644243443	0.00651484937632168	0.142990123382138
KRT18P59	4.42897971524262	1.02676975111256	0.377399747748445	2.72064238844417	0.00651552047575525	0.142990123382138
RAB27B	230.117021090559	-1.29624424513996	0.476551137254828	-2.72005277882029	0.00652714973086738	0.143015574668654
CYP3A4	4.76882865642749	1.65576502570302	0.608727355316108	2.72004372933626	0.00652732836511691	0.143015574668654
MYL2	14.6193205854314	2.07963185951219	0.764713991168253	2.71948974849426	0.00653827216720902	0.143138603875769
GFPT2	7760.5193543693	-1.00952053741942	0.371457422076064	-2.71772880934037	0.00657316892145203	0.143785393785052
PDK2	1142.79709710713	0.602310836779711	0.221660036384402	2.71727302135413	0.00658222857472374	0.143866414950553
CIB3	2.76161299087679	1.94090894515495	0.714626914175096	2.71597515662472	0.00660808764839797	0.14426853496289
RP11.713N11.6	7.0542546136319	1.29888959251669	0.478301265085702	2.71563068578537	0.0066149663187195	0.14426853496289
E2F8	202.622335714596	0.960562281298118	0.353755791031717	2.71532595550357	0.0066210567840056	0.14426853496289
RP11.10L7.1	9.38222586233002	-1.34379918946707	0.494903840118132	-2.71527331278398	0.00662210943374445	0.14426853496289
C2CD4C	148.250118020861	1.48901575453176	0.548513828503297	2.714636673053	0.006634851672641	0.144382958199735
BCOR	1551.07898624423	0.799767597321581	0.294630784719392	2.71447397488787	0.00663811158427047	0.144382958199735
TPRXL	25.3800256376441	1.41976733962658	0.523118167204002	2.71404709038313	0.00664667172878141	0.1444521812124
TRAM2	6015.94450734756	-0.542018243006838	0.199774582821187	-2.71314916718902	0.00666470982528173	0.144601610491925
SMCO2	9.92286539067976	-1.24642763075231	0.459442361628301	-2.71291403416713	0.00666944060405028	0.144601610491925
SH3TC2	39.8099494526325	0.969706689405909	0.35744267130793	2.71290130486554	0.00666969679843256	0.144601610491925
XX.FW83563B9.5	49.7383667297498	0.577487691177633	0.212921764189036	2.71220602260711	0.00668370373920829	0.14478842729243
KEL	38.3113107190845	1.4815010531763	0.546386760697947	2.71145122785159	0.0066989395315211	0.144816358454834
KCNQ4	44.1848084662291	0.869594086368432	0.320731677596713	2.71128219352832	0.00670235582342959	0.144816358454834
LINC00893	37.7900043995073	0.870181967007526	0.320960539053303	2.71118053818763	0.00670441109701185	0.144816358454834
CTB.1144G6.6	12.4005123683011	-1.41816056653297	0.523133116604262	-2.710898089837	0.00671012462841357	0.144816358454834
RP4.616B8.5	18.068328217553	-1.11437014107815	0.411084133127949	-2.71080796186144	0.00671194871105162	0.144816358454834
CCDC169.SOHLH2	1.9546219146053	1.74284976954043	0.643104641320835	2.71005627631748	0.0067271792984937	0.14502848339979
ZNF91	724.262696719499	0.693138847164655	0.255843596872439	2.70922882432054	0.00674398097290656	0.145274111382691
FAM227B	78.9368660663328	0.493926109764005	0.182369286570814	2.70838428472008	0.00676116850062508	0.145527650852396
RP11.146D12.2	3.28620179386136	1.67702506402222	0.619467639189805	2.70720366638617	0.00678526167308858	0.145929302692158
RP11.505K9.4	10.2841324236861	0.626114291731727	0.231397558164414	2.70579472272069	0.00681411530154161	0.146432612184008
SLC9A4	9.12139658851991	2.11534210611379	0.781886533804326	2.70543360789377	0.00682152826779876	0.146474734076427
METRN	931.283907873818	-0.83827392516028	0.309885853034685	-2.70510549917377	0.00682826996709293	0.146502386466494
ZDHHC17	2346.21312147339	-0.714540283770629	0.264255828466979	-2.70397170770414	0.00685161226405175	0.146885880795657
MEGF6	973.531471216699	1.11175944345935	0.411487044314957	2.7018091063115	0.00689633440599438	0.147726742275774
RASL11A	427.691877307859	0.981974519976383	0.363505134115344	2.70140481610032	0.00690472407919293	0.147786336536628
OCA2	31.3237571809973	2.65140456672343	0.981585414256174	2.70114503355025	0.00691011982317046	0.147786336536628
AP3D1	8493.00563213566	0.333974208769225	0.123658540149303	2.70077754731693	0.00691775906677919	0.147832015952126
PCDHGA10	196.870013546977	-1.14768124642446	0.425292011249361	-2.69857231282801	0.00696376069002876	0.148696772381202
RP11.400N13.3	53.0564401620731	-2.19497447653143	0.813925898324601	-2.69677433910089	0.00700146990180245	0.149383228357599
DOK7	50.4309105284555	1.54551688687097	0.573159045016661	2.69648869769829	0.00700747756036702	0.149392747798872
TMEM26	500.754614994262	1.13610129303261	0.421409030774624	2.69595858196076	0.00701863931442417	0.149512045411627
TMEM147.AS1	179.20633055235	0.638030787094752	0.236721140825976	2.69528435385412	0.00703285846527879	0.149696231453502
FGD5P1	19.1970203627359	1.67517159229381	0.621794844840531	2.69409051264076	0.00705809947737375	0.150114543278871
DNAH10	67.3463886873815	1.00424964948006	0.372863464096192	2.69334420285539	0.00707391976220559	0.150331987857885
PPP2R4	9932.11578723045	-0.543692429713429	0.201971902589144	-2.69192111746068	0.00710417461093226	0.150855603477362
CNGB1	3.87950829264497	1.28401570303898	0.477140538144195	2.69106395367929	0.00712245395740565	0.151124295579645
WNT5B	1243.81222298257	-1.12711499045921	0.41895310359872	-2.69031302257348	0.00713850253841207	0.151345268497889
GPR3	290.31722392122	-0.818616331599581	0.304434576585348	-2.68897291753613	0.00716722337108687	0.15172359938903
PPP2R5E	2189.13220890192	-0.261946604932996	0.0974158239850147	-2.6889533365061	0.00716764379512617	0.15172359938903
FAM187B2P	4.8507593824545	1.23792057909015	0.460456897681702	2.68846136375154	0.00717821420356968	0.151827708611251
IGLV7.46	195.904986881892	2.60506007563147	0.96964478110315	2.68661279511837	0.00721805728056383	0.152498189773022
RP11.96H17.1	6.51970489376475	1.98699163295872	0.739630778250379	2.68646423511338	0.00722126786506158	0.152498189773022
HSF2BP	26.6809863171665	0.793464362894121	0.295395215820375	2.68611108236978	0.00722890512316414	0.15253955178196
UG0898H09	17.9293434338582	2.84114817470442	1.05797976000603	2.68544662393941	0.00724329431065831	0.152723211752671
ZMIZ1	7205.92183077089	0.612987564880138	0.228287515058884	2.6851558865233	0.00724959845824075	0.152736246106089
RP11.134G8.7	13.1328405099858	0.826489657231525	0.307887533762925	2.68438818269247	0.00726626848634585	0.15290066918835
ZNF346	902.610853316471	0.508029139403533	0.189261399503986	2.68427233833719	0.007268786931484	0.15290066918835
EN2	32.832974675325	1.98389923694971	0.739903794405763	2.68129350322231	0.00733381613414371	0.153977432855572
GPRC5C	1054.89397640945	0.950978417286703	0.354680437633261	2.68122601751724	0.00733529540232861	0.153977432855572
AP000266.7	1.57845338427106	1.7369628338182	0.647956681229315	2.68067740349988	0.00734733080846867	0.153977432855572
EIF5AP4	6.2900408087995	-0.84680071563439	0.315907211312024	-2.68053619959311	0.00735043138239924	0.153977432855572
KLHDC8A	87.230263724029	1.67049068885511	0.623208134635362	2.68046996824346	0.00735188610345443	0.153977432855572
ZRANB3	260.865794519716	0.369901627302395	0.138004613050013	2.68035697595371	0.00735436848908117	0.153977432855572
PTPRVP	12.9586368244047	1.19501207940134	0.446131226797024	2.67861115210624	0.007392819071742	0.154661920486864
HBB	770.071046556445	-1.24855220717777	0.466181841872313	-2.67825147835712	0.00740076300792638	0.154707623283205
CTD.2576D5.1	2.10581182243288	-1.34400082664819	0.501961996001312	-2.67749518360883	0.00741749189826095	0.15493675534299
DAW1	26.9506212783827	-1.99340076909266	0.744682715356786	-2.67684575992555	0.00743188390862482	0.15495258939495
STMN1P1	1.73703765227578	1.43067363616279	0.534472158770455	2.67679730868307	0.0074329586498021	0.15495258939495
IGLV3.25	1601.07460048876	2.52824807912047	0.944546162879576	2.67668027088561	0.00743555534696191	0.15495258939495
ACACB	1394.44528948434	0.775633906927884	0.289844560830534	2.67603402563549	0.00744990813250651	0.155131342833636
B4GALNT4	247.135202369392	1.75459456869091	0.655788526242354	2.6755493554373	0.007460688716933	0.155183475831745
ACSBG1	12.8049884938322	1.08489904824059	0.405508775305818	2.67540214739472	0.00746396585416628	0.155183475831745
RP11.65M17.3	2.15857582295448	-1.81293516092994	0.677733694624697	-2.67499635226764	0.00747300632806622	0.155251272996531
FOXA3	9.70530619674283	1.94362468326496	0.726700512516007	2.67458829296222	0.00748210714539423	0.15532021803677
SLC29A1	3168.43594315418	0.585543315077635	0.219051044537663	2.67309072327642	0.00751559220066843	0.155861665644591
RP11.545A16.3	18.2091378196394	1.68886915076096	0.631848226581711	2.67290320635656	0.00751979445593736	0.155861665644591
KCNIP1	137.701149825298	2.17072319121631	0.812207968736348	2.67261991358391	0.00752614704454688	0.155862230930878
ZUFSP	453.240548473089	-0.600633384299045	0.224755588773589	-2.67238464492245	0.00753142639223736	0.155862230930878
RP11.196E1.3	3.51559657174128	1.15740280605357	0.43323174438656	2.6715558613841	0.00755005047127658	0.156127371639285
FBXO16	34.4898896729068	1.2478262262855	0.467157667654605	2.67110295449134	0.00756024544540692	0.156217933195785
KDELR2	28034.4819411373	-0.594443937647547	0.222620503796465	-2.67021198636325	0.00758033724685924	0.156279503590547
RP11.474C8.8	2.21732059705398	1.19044399717469	0.445839953490256	2.67011511161191	0.00758252470648301	0.156279503590547
RP11.711D18.2	2.36040140244178	1.73076125435276	0.648206920651037	2.67007524790763	0.00758342500467693	0.156279503590547
KIF5A	174.668412744425	2.10864898757324	0.789807641884789	2.66982601300385	0.00758905600058233	0.156279503590547
IGHV1.69	119.849559882218	2.65686148836969	0.995197789244072	2.66968186332868	0.00759231450322624	0.156279503590547
STK26	411.318112113256	0.936564289770708	0.351019367122459	2.66812711061601	0.00762753948246914	0.156884353428856
IGHG2	37410.6109648401	2.3615103525163	0.885482413148763	2.66691954289504	0.00765499953016111	0.157328689655079
GNG4	629.27325729228	1.48163569095642	0.555829788352052	2.66562843878742	0.00768445717911647	0.157813370600479
RP11.338I21.1	5.52590102590043	1.06791107911234	0.400723617196029	2.66495667658624	0.00769982415776606	0.157887723317483
GOT1	1778.68079461091	0.426634062649618	0.160090454428078	2.66495628470646	0.00769983313029199	0.157887723317483
PAX5	33.9448843493293	1.84662154453666	0.693155048500963	2.6640815046074	0.0077198855716788	0.15817791035654
IGHGP	3225.50430019126	2.31281224938378	0.868229626781017	2.66382553421794	0.00772576198301619	0.15817791035654
CH17.340M24.3	270.954580809466	0.779377690973256	0.292684330788965	2.6628610041144	0.00774794110160783	0.158357263524838
PLAT	10421.717585311	-0.917102332777254	0.344407169026581	-2.66284332979861	0.00774834804968191	0.158357263524838
LRRC74B	1.53133597587137	-1.5747506322387	0.591466330295497	-2.6624518617179	0.00775736644628435	0.158357263524838
SH3RF3.AS1	75.9808791970138	0.867881628617557	0.325974736004986	2.66241991405212	0.00775810285156305	0.158357263524838
HOTTIP	5.68544760737784	1.68074285001385	0.631404358143967	2.66191201935072	0.00776981842524987	0.15840091426897
POU2F3	30.3798327999777	1.39945593559946	0.52576759059821	2.6617386857322	0.00777382032713527	0.15840091426897
ALMS1	1052.96506749023	0.501924210739056	0.188595708373746	2.66137662976071	0.00778218538218233	0.15840091426897
LINC01091	143.403599445982	-1.39312919521246	0.523475855007058	-2.66130554425223	0.00778382871100592	0.15840091426897
INHBC	7.22604462720719	1.09160460786488	0.410228002858474	2.66097048533635	0.00779157866799524	0.158438596653814
RP1.170O19.24	2.74845299372006	1.72677971266729	0.648991770785263	2.66071126075748	0.00779757930946053	0.158440677315226
AIPL1	3.00215981391178	-2.04807588639684	0.770026780570468	-2.65974630762782	0.00781995286758802	0.158767221007737
IGKV1.5	3621.96093156141	2.38912021227546	0.898331415274738	2.6595086976278	0.00782547094833758	0.158767221007737
TERF1	1111.1594333345	0.478275721164632	0.179924899134759	2.65819641119496	0.00785600940895911	0.159265173976557
ADCY5	441.216696654666	1.2803532359057	0.4817079521936	2.6579449852867	0.00786187255948604	0.159265173976557
CDCA7L	692.360529139781	0.716796971329435	0.269776042015968	2.6570075162086	0.00788376853014332	0.159588387533316
CYP3A7	18.3854724024056	-1.44972063308486	0.545845475391112	-2.65591765150402	0.00790929257799251	0.159984500926231
RASA3	3148.75831608988	0.433461265138393	0.163224610947679	2.65561218140896	0.00791645979123874	0.160008986389959
RET	711.242926080666	1.6313921351123	0.614411573435078	2.65521062045014	0.00792589042388865	0.160079149298118
SMPDL3B	65.8893074872042	1.54630000865529	0.582450004047952	2.65482015264608	0.00793507018197728	0.160144143672632
MPL	4.72235061040211	1.36305872336861	0.513520506983376	2.65434136481863	0.00794633930774162	0.16015187249264
RABL3	1100.13328340573	-0.275069887904371	0.103631905882269	-2.65429729929762	0.00794737718832138	0.16015187249264
WNK2	424.146866908172	1.6188086922953	0.610182531476136	2.65299088189091	0.00797820260180887	0.160461937919491
MS4A1	100.201334919829	2.03189634018	0.765897699139811	2.6529604965024	0.00797892082888028	0.160461937919491
KRT17	116.094075109802	1.10533575828062	0.416661262568794	2.65284022677322	0.00798176424290098	0.160461937919491
ZBTB18	675.882120189748	0.620414986450119	0.23388644886047	2.65263331617917	0.00798665814155163	0.160461937919491
RP11.390P2.4	283.681781543406	-1.09295912393295	0.412429199558954	-2.6500527244476	0.00804792104033858	0.161351409934561
TFB1M	262.673957091094	0.465354418333599	0.175607573259252	2.64996782141388	0.00804994375651794	0.161351409934561
ZNF385D	689.540886146294	-1.14843265816503	0.433378607688747	-2.64995234603236	0.00805031248854845	0.161351409934561
SOWAHA	45.1379803098734	-1.63969020209883	0.618816146078706	-2.64972110454643	0.00805582408260378	0.161351409934561
AJ006998.2	2.90222280086056	2.17142693179008	0.819559285046532	2.64950562016607	0.00806096314988386	0.161351409934561
C19orf57	259.744991238937	0.938010222914305	0.354133531770464	2.64874726271978	0.00807907249626601	0.161465046677971
SYT2	31.2646974391846	1.2003470942728	0.453193890136802	2.6486391815884	0.0080816564041052	0.161465046677971
GCLM	790.957802945022	-0.541525039240728	0.204463799653031	-2.64851303829666	0.00808467306164362	0.161465046677971
PRDM11	977.59684179312	0.768088826919715	0.290095768964835	2.64770778857109	0.00810395399842672	0.161729875412882
ZP1	73.5428493519766	-1.43269721253489	0.5412329467814	-2.64709903758601	0.00811855727048151	0.161901028507553
ASB2	215.080261963415	1.34008036729789	0.506355257700284	2.6465220750035	0.00813241971133864	0.162057164900578
IVL	5.19606631409417	-1.64979141964085	0.623570958744545	-2.64571561023693	0.00815183181079812	0.162113271215893
PLEKHA8P1	184.437036138163	0.716376971948378	0.270783197965435	2.64557394007816	0.00815524617754969	0.162113271215893
SERINC1	16000.2058914738	-0.619442815880517	0.234175076076433	-2.64521240372454	0.00816396530145105	0.162113271215893
RP11.800A3.4	25.1784930021145	1.32300163149136	0.500154750579517	2.64518457529082	0.00816463678176285	0.162113271215893
MYO18B	26.1652801398644	1.65593492342679	0.626106879564825	2.64481189629755	0.0081736340255956	0.162113271215893
GPR89B	106.199715990156	0.507474517954495	0.191894604255708	2.64454813579992	0.00818000711252515	0.162113271215893
RASL10B	175.664322286338	0.964220067448436	0.364651747718285	2.64422170874484	0.00818790053152546	0.162113271215893
RP11.266L9.5	13.0727347097831	0.977682117832103	0.369746348358466	2.64419681809609	0.00818850269851194	0.162113271215893
SHISA5	13130.88882072	-0.390715586365926	0.147771838946318	-2.6440463159416	0.00819214456609398	0.162113271215893
PROSER1	1185.45292226608	0.345542375416175	0.13072264337348	2.64332457253748	0.00820962954375779	0.162113271215893
MUC1	454.750436541624	1.04194953661009	0.394206812497551	2.64315456652987	0.00821375297119153	0.162113271215893
TNFRSF9	344.628629975172	-1.3819864680226	0.522933816604417	-2.64275597435312	0.00822342793198914	0.162113271215893
GALNT10	6686.05817108722	-0.625426091082998	0.236659391958932	-2.64272668794623	0.00822413919802721	0.162113271215893
CATIP.AS1	2.85981596832604	1.27340041084941	0.48189172098061	2.64250319191652	0.00822956896082417	0.162113271215893
RBM38	1156.8068751702	0.629500366682008	0.238232410968383	2.64237919652986	0.0082325827714878	0.162113271215893
LINC00844	4.83701732614731	2.16847355709949	0.820678441797332	2.64229379822676	0.00823465902234962	0.162113271215893
CTD.2554C21.2	58.8026711206567	1.44204618173261	0.545782368285942	2.64216337046839	0.00823783095859185	0.162113271215893
PBXIP1	9829.7503467234	0.566804621010325	0.214599496044687	2.64122065269108	0.00826078990042101	0.16233800036538
MTERF4	977.808050979097	0.362964473197919	0.137443325092481	2.64083012364326	0.00827031760177563	0.16233800036538
LRRC8B	657.285980943586	0.78673390639292	0.297922104307645	2.64073694102439	0.00827259242200371	0.16233800036538
RP13.487C10.1	2.26542842684284	1.2455791668716	0.471741384617993	2.64038561696309	0.00828117415430584	0.16233800036538
PLCE1.AS1	2.77207475638633	2.01823919697247	0.764426373995745	2.64020089524502	0.00828568951414661	0.16233800036538
RP1.111C20.4	34.3388204857124	0.615136554358557	0.233002924771808	2.64003790922793	0.00828967539303608	0.16233800036538
CTD.2017C7.2	23.7809436594332	0.787849714692863	0.298457770937669	2.63973597409666	0.00829706385311964	0.16233800036538
NUDT7	69.3261890664648	0.687096295205429	0.260291930738596	2.63971415961973	0.00829759788927359	0.16233800036538
ATP5A1	18365.3016132901	0.421522824343269	0.159720573328229	2.63912666702636	0.00831199175771083	0.16243089651323
LIF	946.983272272504	-1.12322618511336	0.425653072952008	-2.63883020348828	0.00831926374286056	0.16243089651323
TREM1	333.441645046797	-1.60197863510749	0.60713074738369	-2.63860567433111	0.00832477502921536	0.16243089651323
FAM20C	9318.98230225257	-0.780956460883115	0.295981193774628	-2.63853405996385	0.00832653356037218	0.16243089651323
LCN10	4.78586074805533	2.0089124961867	0.761449089329127	2.63827552536263	0.0083328847889931	0.16243682960953
RP11.214O1.2	42.8658291134709	1.04456407454591	0.396100158091937	2.63712107457291	0.00836129824455886	0.162872511562973
DRAM1	4588.65961547667	-0.866810960960866	0.328786188861032	-2.636397118637	0.00837916050334268	0.163102180754196
RWDD1	3479.99735875656	-0.554317135669494	0.210332744690652	-2.6354295736727	0.00840308615546001	0.163449457138281
KCNK9	9.2160948130442	-1.90368431196355	0.722528392861116	-2.63475363843518	0.00841983705805885	0.163466581088957
VIPR2	147.563568079025	1.7842888342736	0.677220105800844	2.63472513439866	0.00842054409563911	0.163466581088957
SGK2	23.3420444125987	0.995864402075219	0.378010224596206	2.63449064939714	0.0084263624700702	0.163466581088957
SEMA4G	180.822259485434	0.966692124004456	0.366947928377562	2.63441226737163	0.00842830819775912	0.163466581088957
SHH	4.20927273305152	-1.82626575400946	0.693383278865087	-2.63384741120185	0.00844234187352612	0.163610728873339
THBS2	44205.7588747455	-1.09311933920134	0.415075336163825	-2.63354442907661	0.00844987797785587	0.163610728873339
PP14571	3.95696633082243	1.39110494857783	0.528258682424905	2.63337829525516	0.00845401279414019	0.163610728873339
KCNT1	13.5862003749264	0.853494383936185	0.324142308307745	2.63308541360132	0.00846130657672543	0.163633993710582
TLE1P1	32.7127533429469	0.956591628396721	0.363423008420004	2.63217134367893	0.0084841063327188	0.163956880798196
KAT7	1741.29154751791	0.340268518527455	0.129302793810312	2.63156354553817	0.00849929710925885	0.164132364449253
RP11.57A19.2	12.1637830166589	-1.69411999514857	0.643976583475632	-2.63071676613638	0.00852050131993347	0.16442363969544
UBL5	6064.16767663082	0.587835399012368	0.223500056512276	2.63013534844489	0.00853508798159149	0.164586886835255
GP5	10.562957181273	1.27558644886698	0.485458343652205	2.62759197683261	0.00859915912286168	0.16570345219391
IGLC3	7221.89218089018	2.25295748127202	0.857602241747137	2.62704243482645	0.00861305922359156	0.165824498328593
EIF1B	2163.35900424953	-0.320261306437877	0.121918119483119	-2.62685569458952	0.00861778719628901	0.165824498328593
AC090616.2	5.59621215870947	1.0177096052035	0.387465251244796	2.62658290500617	0.00862469797459888	0.165838680739925
RP4.798A17.5	27.2484032000268	-1.18849500731195	0.452669491359146	-2.62552486968687	0.00865154884956692	0.16612598231001
SEMA6A	1151.68821335745	1.09979638397767	0.418890668408201	2.62549745535495	0.00865224556387165	0.16612598231001
EVI5L	1842.85102849637	0.486630190626856	0.185364321071627	2.62526352327974	0.00865819280894997	0.16612598231001
DPM2	3835.3932843431	-0.704856858784294	0.268519366311941	-2.62497587591301	0.00866551066399132	0.166147714101452
RASSF7	264.651091225663	0.801400366521312	0.305389300778057	2.62419267629724	0.00868546357578566	0.16641149969526
SLC44A4	226.204195041389	1.08973506108041	0.415314510355783	2.62387909381465	0.00869346395495128	0.166417133098468
RNVU1.3	2.24792951551315	1.43275863865706	0.546084169028448	2.62369561308857	0.00869814812263601	0.166417133098468
NINL	712.205431295474	0.878446836228706	0.334942834502503	2.62267690405582	0.00872419628644585	0.166796697969045
PART1	107.036097118577	-1.99391203799663	0.760395392810761	-2.62220425958427	0.00873630535766866	0.166864297619728
SNORA59A	5.68366432421014	0.722175277426911	0.275467762891483	2.62163263623483	0.00875097031580957	0.166864297619728
HSD3BP5	20.2103403890779	1.27003161425952	0.484492224705796	2.62136634913126	0.00875780940068881	0.166864297619728
MATN3	241.482304581397	1.33243581994219	0.508353683093179	2.62108029164798	0.00876516157137298	0.166864297619728
BFSP2	14.1640414631895	1.61286843149939	0.615355282129265	2.62103613691022	0.00876629691549744	0.166864297619728
SLC6A3	10.8969977765109	1.72964417494393	0.659918619703216	2.62099617028808	0.0087673246845331	0.166864297619728
ALB	54.6938561743673	1.54616348205628	0.589973297252137	2.62073468283683	0.00877405167032393	0.166864297619728
RP11.602N24.3	3.96119308512727	1.38233605947977	0.527487672750206	2.62060353424482	0.00877742731504263	0.166864297619728
GLYAT	3.35715757451183	1.9090705778503	0.728561312264255	2.62032933359748	0.00878448873831656	0.166880435989151
EZR	6481.4943088868	0.678736022326315	0.259138603572834	2.61920074033103	0.00881360659953044	0.167315265354478
CHN1	1216.01760429156	0.653869549460411	0.249740906279186	2.61819162588226	0.00883971487907663	0.167692387769602
SLC39A14	4724.52390038333	-0.769367440572291	0.29402717697838	-2.61665417625277	0.00887962532690404	0.168287401743643
TEKT4P2	195.033943747139	-0.773206123303169	0.295511494262416	-2.61650101033484	0.00888361014341769	0.168287401743643
KLHL10	4.65651240734051	1.20889334042764	0.462203156579775	2.61550212978476	0.00890963655844889	0.168577263288535
KNG1	3.74101938842508	2.55671808911003	0.977550918901558	2.61543213726701	0.00891146280506735	0.168577263288535
IRX6	93.1319174798059	-1.43953655953279	0.55064311908127	-2.61428229945851	0.00894151230465069	0.168850259046259
RP11.54O7.1	23.250632914792	1.80031230823789	0.688731046149137	2.61395550310078	0.00895006919695757	0.168850259046259
CALB1	80.3289250460381	-1.79103334148737	0.685227349450594	-2.61377970818502	0.00895467526599168	0.168850259046259
RP1.197B17.5	12.6393772062634	0.924161776034711	0.353601826585004	2.61356618250542	0.00896027278032661	0.168850259046259
SIAH1	839.398678492446	-0.320693891761886	0.12270505499031	-2.6135344773466	0.00896110418834355	0.168850259046259
JAKMIP3	51.0342649090258	1.23920899152439	0.474184657430844	2.61334687258438	0.00896602517965529	0.168850259046259
AJ011931.1	3.82930339285271	1.63323174918063	0.624993157896424	2.61319940633861	0.00896989500629187	0.168850259046259
GNAQ	4740.31835158398	-0.297634533859035	0.113957310546823	-2.6118072849459	0.00900650079161087	0.169420605227067
NBEAP1	7.69491558152035	1.57582592986676	0.603452901469946	2.6113486670264	0.00901858931328076	0.169446174885675
IGKV1OR2.108	36.9090915625147	2.49973205673655	0.95734135620695	2.61111884546663	0.0090246525330618	0.169446174885675
PKIG	3722.50383716942	-0.511714884451505	0.19598139464121	-2.61103808036635	0.00902678416578815	0.169446174885675
ROPN1B	4.54324208822164	1.50095591556116	0.575204172689135	2.60943154939932	0.00906927884327807	0.170006628834158
PRKACA	8212.76381992844	0.422627021371411	0.161969916981414	2.60929331352258	0.00907294368072071	0.170006628834158
IER5L	1307.81654170938	-0.891666496833002	0.341740453831343	-2.60919211300943	0.00907562749416211	0.170006628834158
SCGB3A1	26.2244339774541	1.07921241227191	0.413791626422792	2.60810597256801	0.00910447633549909	0.17035907277991
CCDC177	2.35042099896997	1.1590984997351	0.444438525873829	2.60800635466097	0.00910712636854855	0.17035907277991
ATAT1	550.674650581276	0.588523765897496	0.225696029571883	2.607594679507	0.00911808504483001	0.170445372633419
DNAJC28	42.7553391589257	0.575679540259718	0.220823535299496	2.60696641541827	0.00913483194903558	0.170639677200969
RP11.115D19.1	2.41766944803791	1.89706942458125	0.727864762763402	2.60634876371657	0.00915132273096649	0.170828930645741
GALNTL6	19.9921820023537	1.46614973831185	0.562610578743537	2.60597612932583	0.0091612846037592	0.170893636064069
GRM1	28.4287382521732	-1.21275034747498	0.465414351819887	-2.60574333974194	0.00916751282735177	0.170893636064069
YIPF2	3056.89010435076	0.609826864727334	0.23409212479059	2.60507210685905	0.0091854926506057	0.171110057961561
LINC01141	4.31170363691187	-1.40316204759965	0.538756047087431	-2.60444788543031	0.00920224145006599	0.171303263916613
PRRC2C	14153.533773304	-0.879564383459846	0.337801073304626	-2.60379392775541	0.00921981734811318	0.171511588369125
MYL6B	2761.84489091272	0.653061288067921	0.250877747682956	2.603105672382	0.00923834738965211	0.171737361647637
AGFG1	4162.28788741421	-0.445788329543114	0.171320723192522	-2.60206892217095	0.00926632277107823	0.172097241173006
SMIM24	14.4340320464548	1.42640279946254	0.548228773823854	2.60183862571366	0.00927254727882819	0.172097241173006
CTC.523E23.4	16.2636425861192	1.36876831816383	0.526167858693735	2.60139097352304	0.00928465720527033	0.172097241173006
TNFSF4	1063.14415274869	-1.14388053679275	0.43974030036922	-2.60126382738246	0.00928809934628992	0.172097241173006
CSRP1	9776.31191028821	0.617696787061584	0.237476488835603	2.6010860699949	0.00929291355997894	0.172097241173006
LDHD	199.524513047689	1.04750502355096	0.402746150454513	2.60090635843153	0.00929778296200281	0.172097241173006
CYP27B1	1273.88040154324	-1.31904400428492	0.507223794790064	-2.60051680901694	0.00930834587441562	0.172097241173006
PSD2	33.4535111004693	1.28666340501268	0.494786136083404	2.60044352737441	0.00931033415498661	0.172097241173006
RP11.383J24.1	2.04922811506063	-2.27835123873454	0.876281185968485	-2.60002300085498	0.0093217512263096	0.172097241173006
SLC16A4	437.76862693896	1.1027329089853	0.424124425038725	2.60002217246653	0.00932177372893769	0.172097241173006
AC004156.3	7.77768268214029	1.25774085310204	0.483869771739958	2.5993375212907	0.00934038841016897	0.172322468045301
RBM22P2	6.93034905910021	1.04478235726175	0.402103094686178	2.59829474348402	0.0093688037650098	0.172722579718705
HTRA1	22114.177113884	-0.815223940889617	0.31378058069724	-2.59807008795171	0.00937493564253859	0.172722579718705
CTC.471F3.5	21.2231034187508	0.828701894964479	0.319002973481754	2.59778736831078	0.0093826574430739	0.172746363424161
LINC00689	13.1864369922496	1.59680136254545	0.614803021720891	2.59725685484736	0.00939716244414105	0.172894916146929
NKAIN2	11.9196222592666	1.50268914841277	0.578789854942385	2.59626034489211	0.00942446254514062	0.173163726960988
AC083949.1	6.60906938982193	1.45037074118033	0.558703136760798	2.59595954586754	0.00943271703761114	0.173163726960988
ADD2	314.771044340196	1.29464422661016	0.498726993884272	2.59589764036429	0.00943441664129945	0.173163726960988
AC073869.1	2.86593727142963	1.43656466654746	0.553422431555882	2.59578322929326	0.00943755849418833	0.173163726960988
ALAS2	7.39426380516306	-1.67148943186616	0.644031984825468	-2.59535158384895	0.0094494203532442	0.173177245262461
LINC01239	40.2402812595863	-1.52703544154677	0.588387830527797	-2.59528726176574	0.00945118909815976	0.173177245262461
PCNP	5675.50651739658	-0.316308979366485	0.121893570489849	-2.59496032559672	0.00946018383733821	0.173204116482255
KCNJ3	52.2626678249662	1.69580566904921	0.653548754800535	2.59476535850301	0.00946555144799159	0.173204116482255
KLHL36	1791.38732892507	0.533581364236072	0.205693072934618	2.59406579241333	0.00948483346588242	0.173290579947898
LINC01021	74.3467642159793	-2.05758648630383	0.793323440309354	-2.59362875437222	0.00949689724010348	0.173290579947898
LTF	272.87614319079	1.32959677141308	0.512665031454282	2.59350002406327	0.00950045325361921	0.173290579947898
FFAR3	15.6210957378307	-1.44901407701992	0.558721415848264	-2.59344645814227	0.00950193329490832	0.173290579947898
GOLPH3	6617.76039718155	-0.430935445497892	0.166167080090371	-2.59338639918042	0.00950359298524243	0.173290579947898
IRF1	3153.45846883044	-0.759898177082328	0.293035900747606	-2.59319139785822	0.00950898350246452	0.173290579947898
KRI1	2381.36078925298	0.470503222771136	0.181522654218766	2.59198073538578	0.00954251149630813	0.17378369072124
WHAMML1	126.121746782246	0.767750336136593	0.296250320020435	2.59155951657246	0.00955420139304442	0.173878697709999
RP11.452H21.4	4.02369865955856	1.36521595257743	0.526851910516189	2.59127076380883	0.00956222239451397	0.173906850346266
TGIF2	1206.58294689566	0.518078378605421	0.200095869283442	2.58915079287093	0.00962129524506863	0.17486280979231
ANKRD20A11P	7.93067977654212	1.37889367610037	0.532693055394767	2.58853323154082	0.00963856463626539	0.175058230736552
RP11.739N20.2	1.7651782345065	1.56799810907534	0.605943080844453	2.58769867772093	0.00966194587529736	0.175250176632884
RP11.95O2.1	3.61123909328257	1.587706187657	0.613561134257568	2.58769028709452	0.00966218120740455	0.175250176632884
RELL2	50.225816995567	0.698490511152778	0.27002524105105	2.58676006892527	0.00968830276515874	0.175575512068282
PLEKHH2	588.921488323188	-0.819820852892524	0.316950904062819	-2.58658625794624	0.00969319054416136	0.175575512068282
MAFB	10598.9994339199	-0.831571100214017	0.321701403513823	-2.58491598460896	0.00974027285878266	0.176257268426641
IGKV2.24	43.850669451928	2.3880695896949	0.923926002074987	2.58469789174856	0.00974643556586236	0.176257268426641
CUL4B	3616.74102603731	0.406991908051947	0.157470869439925	2.58455363521831	0.00975051376971144	0.176257268426641
HBA2	245.736470603128	-1.24813518771531	0.48304314626941	-2.58390000428487	0.00976901130490956	0.176472886128097
ACTBP8	4.65489732530446	-0.925861342824173	0.358442253783403	-2.58301395287969	0.0097941361907121	0.176778946003435
AC073343.13	19.7154957033023	1.04002543914633	0.402678207473311	2.58277060899867	0.00980104652479998	0.176778946003435
ENSG00000273045	11.4077262719718	0.820661255316202	0.317778241664762	2.58249668390434	0.00980883048381693	0.176778946003435
RP11.307O1.1	2.42764088249744	-1.07150578539768	0.414930289990965	-2.58237542846296	0.00981227788292463	0.176778946003435
C19orf81	5.58267873878186	1.55105344509389	0.60071768355506	2.5820006428223	0.00982294019611532	0.176852425970543
TMEM72	4.78044697373166	2.29032396665832	0.887141919585165	2.58168835909512	0.00983183227007276	0.176893957427123
KLK4	21.4612577232954	-2.12271666011903	0.822821941698543	-2.57980074733682	0.00988573364315806	0.177744696869151
REN	116.852329900953	2.00164778365296	0.776009272174699	2.57941219960364	0.00989686137026841	0.177825745905117
AIFM1	1771.87515338222	0.418782033202685	0.162372634823361	2.57914169871211	0.00990461490837045	0.177846100045887
CRB3	3.78871182471024	1.45329573037961	0.563621394232162	2.57849639004474	0.00992313365721522	0.178059596726864
AC024704.2	5.12600536177516	1.05209822845759	0.408180089414335	2.57753441616215	0.00995079717387479	0.178325235651669
GABRG3	2.38254086030342	2.0235816877809	0.785110182046468	2.57744929827076	0.00995324821716122	0.178325235651669
NSMF	2555.7222498142	0.516002306467469	0.200230074970731	2.57704696231521	0.00996484110940585	0.178325235651669
PDHA1	2744.21934246356	0.360258824764912	0.139804593969483	2.57687401061763	0.00996982822811889	0.178325235651669
PICK1	727.65274948776	0.376175869457567	0.145984032736415	2.5768288655019	0.00997113036813367	0.178325235651669
DDX26B	429.85032557952	0.686202590868146	0.266347005438094	2.57634806045393	0.00998500783630668	0.178454611110359
RP11.333E1.2	7.08974491196269	0.834553235075068	0.324000978569185	2.57577381019195	0.0100016049540662	0.178632388481466
ST3GAL4.AS1	220.60769030296	-0.460966277158277	0.179017786801307	-2.57497472957761	0.0100247410575065	0.178926640722086
SMIM20	1428.90758084879	-0.601268913808358	0.233538942512714	-2.57459808346792	0.0100356627637392	0.178999337757006
CARM1	3296.68095662804	0.544248334238714	0.211424022807619	2.57420290755673	0.0100471331744611	0.178999337757006
ACY1	139.471164375078	0.432711024507901	0.168104989945598	2.57405223157228	0.0100515097825414	0.178999337757006
TFAP2A.AS1	18.1920254022666	1.3283756355753	0.516140083811147	2.57367268545905	0.0100625417898542	0.178999337757006
GPR78	83.9237040780923	1.49585898542351	0.581228671022862	2.57361527398684	0.0100642114684138	0.178999337757006
FBP2	9.60604817964181	1.9090423192223	0.741819978413064	2.57345767810973	0.0100687960446295	0.178999337757006
RP11.174G17.3	13.78669334841	1.45994613062455	0.567369834456989	2.57318250277055	0.01007680555004	0.179023247807656
ZNF658	117.200484387487	0.547981276354219	0.213043501268561	2.57215673367778	0.0101067125437396	0.179240352699327
RP11.297N6.4	7.71400228580819	0.826223855976463	0.321227502157362	2.57208318225416	0.0101088600191236	0.179240352699327
HERPUD2	1542.7217165355	-0.203602709146114	0.0791588735332012	-2.57207688864747	0.0101090437919544	0.179240352699327
TP53TG5	18.485697669147	0.857228111567191	0.333425655680514	2.5709722601208	0.0101413449795384	0.179694464934274
GCDH	1081.06899387811	0.362187183500876	0.140953248819208	2.56955541312446	0.0101829104704678	0.180312024428284
LINC01296	50.9763677185956	0.893703676618612	0.347871140025609	2.56906530548301	0.0101973238352441	0.180409552961984
GNRHR	3.90577430510444	1.06410777338625	0.414225157605346	2.56891150585325	0.010201850604916	0.180409552961984
RP11.321F8.4	20.235714658291	-0.949113419325574	0.369497037061359	-2.56866313969376	0.0102091645192992	0.180420116656194
POLR3E	1319.11856022656	0.237498136304625	0.0924789473114752	2.56813191768626	0.0102248236755141	0.18057804968551
ATP10B	9.44879150374466	1.53837936196406	0.599185097093325	2.5674526443111	0.0102448781805105	0.180702833771205
SLC23A2	1786.60045310593	0.60290838026044	0.234858904767658	2.56710888121056	0.0102550405961774	0.180702833771205
PKIA	350.219644502662	1.1779364591728	0.458994530334353	2.56634095032622	0.0102777747899068	0.180702833771205
CCDC150P1	9.51926405310047	1.24192058027539	0.483946438832423	2.56623560093069	0.0102808971004786	0.180702833771205
RP11.661C3.2	1.70443808140213	1.3898270738245	0.541612061858929	2.56609328280894	0.0102851164185757	0.180702833771205
TMEM182	186.146575221265	0.624739917843083	0.243464848261629	2.56603744772113	0.0102867721873285	0.180702833771205
FAM149B1	1399.10972209931	-0.414869314601292	0.161683903080694	-2.56592837441732	0.0102900074000059	0.180702833771205
NUMB	2758.67739240994	-0.316189549755372	0.123226764472704	-2.56591618799998	0.0102903689163847	0.180702833771205
RP11.491F9.1	3.90885808059351	1.59597484387255	0.622007112110391	2.56584661621892	0.0102924330157823	0.180702833771205
ACAN	907.201050928476	-1.40495681236176	0.547651934954404	-2.56541924293345	0.0103051206820477	0.180807414605594
ELAVL2	82.991094049075	1.40680216810624	0.548498093639414	2.56482599378199	0.0103227558691008	0.180965291880684
DNAJC3.AS1	92.5493260375479	0.596507046402497	0.232586871369922	2.56466344333671	0.0103275926011871	0.180965291880684
ANKRD52	2072.04744468271	0.637007159522258	0.248453086584028	2.56389312075147	0.0103505411935648	0.181249177015343
SCARB2	16620.6544863159	-0.364945501525227	0.142360280062508	-2.56353458538425	0.0103612377474789	0.181269242584646
LZTS3	752.45349797462	-0.732344960718923	0.285692545362914	-2.56340241495846	0.0103651834044381	0.181269242584646
RP11.272G22.3	7.77346484377561	-0.653356449441934	0.254980151234854	-2.56238160608882	0.0103957024752823	0.181658955258993
ZBTB7C	577.965261870134	1.19132291739824	0.464960046039452	2.56220491963981	0.0104009929710495	0.181658955258993
MTMR4	1279.40796482466	0.43492667415065	0.169797787907026	2.56143898876232	0.01042395483724	0.181784906408411
RP11.379F4.6	23.8755799449093	-0.815550907159458	0.31842210621862	-2.56122577934185	0.0104303546692685	0.181784906408411
B3GAT1	90.1807793346185	1.53655044938552	0.599960947083702	2.56108411198163	0.0104346089814525	0.181784906408411
GATSL2	81.5510594426718	0.836577100128542	0.326652422919836	2.56106197728663	0.0104352738322452	0.181784906408411
C1orf106	20.8735891041723	1.53061637419319	0.597937066289925	2.5598285513396	0.0104723813625835	0.182229824075206
HAO2	11.6466626598089	-1.2769645634047	0.498860629200031	-2.55976216333695	0.0104743819660531	0.182229824075206
IGHV3.66	74.2823237378991	2.54675911382789	0.9955339654798	2.55818405211365	0.010522038584745	0.182940453374382
ACOXL	20.1543376312227	1.04356615332084	0.408027439656923	2.55758817151683	0.0105400833991865	0.1831356534728
ADAMTS9.AS2	26.5100466848097	1.00005342882968	0.391067494538096	2.55723997212012	0.0105506405201251	0.183156996382847
C4BPB	229.650599414727	1.56795178412303	0.613217735105592	2.55692504368459	0.010560196992097	0.183156996382847
RALGAPA2	1382.89677877149	0.664176384051066	0.259761161099181	2.55687332640722	0.010561767083502	0.183156996382847
WHAMM	725.701606369192	0.335901988888438	0.131442942925329	2.55549656309247	0.0106036408254972	0.183598680425308
SLC29A2	141.90637122957	0.591256903674954	0.231375166348669	2.55540347309341	0.0106064774449479	0.183598680425308
PTPN12	4251.61556790996	-0.329986622379852	0.129134980752905	-2.55536199762378	0.0106077414943071	0.183598680425308
GPR22	3.54753818889263	1.65807230801231	0.648979816355145	2.55489040834046	0.0106221235627891	0.183729222887083
RPLP0P6	347.549317562688	-0.609540198060572	0.238602591478638	-2.55462522130714	0.0106302185926871	0.183750921387877
KIAA1211	480.572890441216	1.24267548944718	0.486668739614502	2.55343191023842	0.0106667132235718	0.184263183673045
FZD10.AS1	214.755339082597	1.50057876335243	0.587785544699749	2.55293580606673	0.0106819181688991	0.184293675544403
STYX	969.954009119349	-0.302263530926721	0.118398832329726	-2.55292662080445	0.0106821998668243	0.184293675544403
HGF	820.371054246382	1.00475429687381	0.393606621742808	2.5526864675827	0.0106895673428251	0.184302412042984
OOEP	7.64868190496133	1.47479388779157	0.577971241045987	2.55167347967443	0.010720693767979	0.184720510580791
PLBD1	2236.80573527969	-0.891853456684968	0.349587858304112	-2.55115684226404	0.0107365996716665	0.184875987423273
STAMBP	1692.10379784947	0.301796431216792	0.118349950257692	2.55003428864709	0.010771232480027	0.185348812622646
SERPINA10	1.43193438545888	2.09968692937312	0.823464806986742	2.54981987275982	0.0107778588830531	0.185348812622646
MICE	18.2088593482288	0.948729485120672	0.37212529516777	2.54948937210233	0.0107880799193056	0.185405887902999
RP11.636O21.1	3.26579612507305	1.68790265257573	0.662421942778916	2.54807780897902	0.0108318308626788	0.186038772783425
RP11.399C16.3	12.5551784778344	-0.842884061632987	0.330821242440302	-2.54785350364884	0.0108387976373334	0.186039477401949
MMP2	126802.028511167	-0.66139420107491	0.2598494990005	-2.54529719556488	0.0109184766703267	0.187287433153458
LRRC14B	3.07993496371253	2.35059502462878	0.924117099273295	2.54361165535974	0.0109712986043564	0.188073403388782
CIB2	408.424570624051	0.727829590531137	0.286194670838008	2.54312768438342	0.0109865073251622	0.188175251281119
NFIX	13883.2356680231	0.630942039812794	0.24819301389098	2.54214262489249	0.0110175205629808	0.188175251281119
RP6.24A23.7	0.89070537776256	2.58297225573392	1.01609887180767	2.54204814846289	0.0110204991068692	0.188175251281119
APOA1.AS	2.07677240253868	1.13026781631387	0.444687466811072	2.54171277733372	0.0110310780792792	0.188175251281119
PCDHA11	47.5989180386518	2.03117817992109	0.799152478668793	2.54166536942308	0.0110325742456456	0.188175251281119
HRASLS5	500.241253305219	1.20193151980962	0.472902568445989	2.54160497321742	0.0110344805762772	0.188175251281119
IL1RN	460.11942461199	-1.14728808007241	0.451416207805295	-2.54153054373108	0.0110368302523991	0.188175251281119
C1QTNF2	1243.42429858389	-0.992372577313437	0.390468799764857	-2.54149007016963	0.0110381081551839	0.188175251281119
ZFP90	1333.65534405348	0.327506186757961	0.128867345679918	2.54142106388553	0.0110402872466325	0.188175251281119
RPL17P50	87.7659081239415	-0.661643756686264	0.260513226342833	-2.5397703063857	0.0110925291856293	0.188854452255574
LDLRAD3	1611.93059695004	0.759220346244458	0.2989388711525	2.53971771324831	0.0110941972176046	0.188854452255574
LRRC43	41.004253364244	0.942502307606209	0.371198600865017	2.53907828695976	0.0111144949462193	0.189080154050248
TP53INP1	2175.29085452539	0.593914536632167	0.233971632432396	2.53840403837749	0.0111359337869498	0.189152733953934
OVCH2	1.44739214595639	2.32511511349729	0.915980914423707	2.53838816604617	0.0111364389160118	0.189152733953934
UPF3B	645.683887070448	0.458311006641296	0.180574072976913	2.53807758270975	0.0111463271727658	0.189152733953934
AC009236.2	3.98194693601805	1.89702956145135	0.747433282534442	2.53805872146714	0.0111469279223095	0.189152733953934
LINGO2	96.0271781383665	1.47922037048295	0.582922992587903	2.53759139593364	0.0111618218973469	0.189285896342508
NUDT9	1423.28919656157	-0.253431045664135	0.0999153853211855	-2.53645667130704	0.011198059913805	0.189780621706391
PKIB	230.276716775683	-1.17670943116265	0.464239472402102	-2.53470353366127	0.0112542527071583	0.190612696229311
RP11.388C12.1	5.9582140295303	1.03531596106964	0.408558659200588	2.53406931356052	0.0112746427670606	0.190837715191419
RNF133	3.38478559194759	-0.985862878515263	0.389100513538795	-2.53369719188759	0.0112866216744782	0.19092017091929
MMP13	203.61916072142	-2.37497325439263	0.937528761510249	-2.53322708795283	0.0113017708680065	0.191005682409581
GSTM4	746.742949199383	0.655801160414734	0.258928601591456	2.53274901414512	0.0113171954056609	0.191005682409581
RP11.92G12.3	6.78114849201214	1.21377557952356	0.479245572277524	2.53267979869969	0.0113194301158576	0.191005682409581
RP5.1024G6.5	30.9645617811375	-0.701639111125785	0.277036609602678	-2.53265845309061	0.0113201193654997	0.191005682409581
TAC4	4.18814336852677	1.07535817785395	0.424721241766864	2.53191522368978	0.0113441414886212	0.1912801868442
MAB21L3	3.76602933880302	2.01075586280584	0.794235571571862	2.53168698907099	0.0113515274003677	0.1912801868442
IGSF21	507.448454769328	1.2661474019891	0.500158013251779	2.53149478453266	0.0113577506520921	0.1912801868442
HCG15	10.7947666967483	1.17422907187268	0.464013412274988	2.53059295444847	0.0113869908212935	0.191630178791375
RP11.390F4.3	11.2327356353554	0.949538879239414	0.375272341913577	2.53026608461885	0.0113976054584435	0.191630178791375
CTD.2267D19.1	20.999402364603	0.916635664602568	0.362308434542817	2.52998709720693	0.0114066721283694	0.191630178791375
TUBE1	705.570406981083	-0.705957560161955	0.279053146719539	-2.52983192793549	0.0114117176658062	0.191630178791375
JPH4	370.510280095862	1.41800208816861	0.560555500204103	2.52963727526053	0.0114180498605368	0.191630178791375
HOXB13	515.839449729748	2.47673616495636	0.979126551992035	2.52953630959903	0.0114213355760923	0.191630178791375
CASQ1	30.10102969092	1.21678868406871	0.481090268527381	2.52923154690555	0.0114312585291037	0.191676945448679
CTB.133G6.1	18.3090064869138	1.28647450873019	0.508864987164094	2.52812541868858	0.0114673379480898	0.1921619662892
RP11.813P10.2	4.52199983095887	-0.920975153515764	0.364367831195338	-2.52759731970419	0.0114845989700843	0.192331232876811
MRAS	1797.40759141875	0.81525638989857	0.322713940146592	2.52625092528771	0.0115287105261117	0.192785149120667
RP11.248G5.9	5.93634309439117	1.26057826358097	0.499052219925275	2.52594460709887	0.0115387673168404	0.192785149120667
DDIAS	217.495614854086	0.585078446846241	0.231645176880043	2.52575276863728	0.0115450695656943	0.192785149120667
METTL17	1106.9547248558	0.389209305017876	0.154100950954085	2.52567750301451	0.0115475430150297	0.192785149120667
RP1.18D14.7	9.85162649156512	1.23399506097799	0.488661383337369	2.52525594011599	0.0115614055045687	0.192785149120667
MAPK1	6891.75442454765	-0.376766419143377	0.149199364136461	-2.52525485831681	0.0115614410969668	0.192785149120667
RP5.1107A17.4	1.21989149451317	1.96105197006471	0.776615475308971	2.52512605325631	0.0115656796219804	0.192785149120667
LRRC38	17.8084999209679	-1.61201239820558	0.638535922722776	-2.52454457273416	0.011584831284351	0.192785149120667
RP11.678G14.2	8.48364750870799	1.19680355247011	0.474092561650256	2.52440904852882	0.0115892989557334	0.192785149120667
LYSMD2	586.109809059911	-0.585401916284819	0.231903955598572	-2.52432915503242	0.0115919334294143	0.192785149120667
CEBPA	843.506607706675	0.977246339283382	0.387154509582952	2.52417656283039	0.0115969666065471	0.192785149120667
RP1.60O19.1	2.83279864778276	2.07139581904935	0.820630864288107	2.52415051540412	0.0115978259615441	0.192785149120667
GCOM1	10.632813914302	1.23068535499353	0.487648081615289	2.52371618261473	0.011612163769346	0.192875007368571
CCDC114	20.3404321910087	0.821172279138144	0.325451398205135	2.52317944758238	0.0116299037134262	0.192875007368571
RP3.395C13.1	7.3567243433618	1.10323813223733	0.43724964871673	2.52313097443346	0.0116315070110971	0.192875007368571
CRHR2	21.3944739097471	0.854383974793693	0.33862234872423	2.52311750247026	0.0116319526445196	0.192875007368571
TNXA	38.7794969007532	-1.28042090881115	0.507594115898418	-2.52252906152166	0.0116514322227799	0.193012691643625
TEX30	422.678425326656	-0.383163982123323	0.15190256253301	-2.52243264191187	0.0116546268277105	0.193012691643625
SUGP2	2196.88905292333	0.481795001425395	0.191067094061457	2.52160113593619	0.0116822088085951	0.193137898307178
SLC29A4	571.479526441646	0.864735343215263	0.342956936937725	2.52141085390054	0.0116885288122337	0.193137898307178
ZDHHC22	4.02762083513382	1.48103452179345	0.587417185317197	2.52126522480562	0.0116933677674901	0.193137898307178
TIMM44	2223.00100569759	0.397843135748393	0.157798982636194	2.52120215924093	0.0116954638578538	0.193137898307178
FAM160A1	14.90862291388	1.72455380170563	0.684104997336793	2.52089051888128	0.0117058266444454	0.193137898307178
CTD.2062F14.3	2.16238860650851	1.53828223777422	0.610243107346591	2.52076954127815	0.0117098516329734	0.193137898307178
RP11.161H23.9	6.0887343344189	2.24146940753	0.889248211902524	2.52063414638129	0.0117143577482706	0.193137898307178
SMAD3	8166.49903719003	-0.741326619884498	0.294129975870415	-2.52040485737878	0.0117219922876519	0.193137898307178
XXbac.BPG13B8.10	7.25031929822855	-1.90228765360611	0.754798890418413	-2.52025761796179	0.0117268971833448	0.193137898307178
SOAT2	48.2865128315846	-1.29412918514316	0.513710514078148	-2.51917986818991	0.0117628550627197	0.193611404837486
LINGO4	2.94699622770199	1.75041441686911	0.695075219885762	2.51830933802647	0.0117919706605234	0.193971779475187
BOK	1802.45496010288	0.93839104333679	0.372669211254795	2.51802675133044	0.0118014357373978	0.194008669998764
AC005593.2	1.40753443170617	1.48366345648402	0.58929835685249	2.51767791176008	0.011813129208089	0.19408212647565
CALHM2	3531.68252396778	-0.5574823440614	0.221480385066277	-2.51707321122174	0.0118334237550513	0.194159063506257
CXCR5	3.07104845764453	1.72244488949154	0.684337260673067	2.51695324582716	0.0118374536252912	0.194159063506257
RP11.368N21.5	7.7236186195663	0.716651892062737	0.284736795406218	2.51689245515435	0.0118394961664526	0.194159063506257
FAM26E	1895.11962471809	-0.755790697018444	0.300411020808154	-2.51585542695886	0.0118743880548487	0.194497527409896
CTD.2231E14.2	50.5343551494818	0.926229777959433	0.368186397030193	2.51565453104852	0.0118811579392663	0.194497527409896
RP11.902B17.1	13.6732683334409	0.798207613746506	0.317324988597403	2.51542627410036	0.0118888540019665	0.194497527409896
ELOVL6	1172.30020667686	-0.59777114741917	0.237652706463755	-2.51531386414208	0.0118926457149374	0.194497527409896
VCAN.AS1	5.07140786366754	1.11424067955948	0.443002035235791	2.51520442556526	0.0118963382300074	0.194497527409896
NCSTN	6906.66095190008	-0.420468497769632	0.167268037533506	-2.51374084355719	0.0119458180518824	0.195135842935743
CTD.2201I18.1	101.654430074069	-1.36550028405329	0.543240524054119	-2.51362006991447	0.0119499092260181	0.195135842935743
IGHA1	52403.3589586303	2.07665102627079	0.827240459489147	2.51033541994937	0.0120616532000755	0.19684090416794
TAS1R3	90.1416616148018	1.12482684477525	0.448159577444194	2.5098801886373	0.012077213048331	0.19697516509063
ARSE	83.4606135972068	1.45999827988084	0.581869494428106	2.50915075263708	0.0121021823328237	0.197182862838174
ARL8B	4279.56982892066	-0.319695052232063	0.127422451733548	-2.50893816499917	0.0121094680139052	0.197182862838174
TMEM132C	493.114934140891	2.0184358779645	0.804521453165114	2.5088652018211	0.0121119694618043	0.197182862838174
TMEM220.AS1	57.0202939489454	0.525257092227555	0.209426690262666	2.50807139991933	0.0121392135381101	0.197506695372934
MAMLD1	542.848984070409	0.780527865325956	0.311259760073535	2.50764141545813	0.0121539937001454	0.197627468991105
ZSCAN26	690.111864754945	0.359798207473616	0.143520935729175	2.50693883540836	0.0121781783037039	0.197900922924437
HIST1H3C	4.84740950949732	1.05851882068682	0.422332096436991	2.5063660318906	0.0121979272130134	0.198091185826867
OPRD1	18.4445773938975	0.943764112137666	0.376576005774362	2.50617165636186	0.0122046352670488	0.198091185826867
SMC2.AS1	11.9469181919456	1.14751660132233	0.457932599495115	2.50586353229166	0.0122152755715695	0.198144162079409
COMP	5008.89210866745	2.0750043743008	0.828501831076117	2.50452599676894	0.0122615594024006	0.198689618883711
GNAZ	437.658569815595	1.04547865674047	0.417446008462457	2.50446437514445	0.0122636954846696	0.198689618883711
PMCH	11.3684159637182	-1.519718564533	0.607007601746868	-2.50362361222412	0.0122928730574747	0.199042288167501
UPK1B	4.20149530074382	2.13552597535948	0.853134189421552	2.50315366778048	0.0123092086421479	0.199186724424925
CSGALNACT2	2117.41074568851	-0.521314904977801	0.20833003400162	-2.50235117310905	0.0123371483574622	0.199471843474632
KISS1R	2.57585727469379	1.86868102677216	0.746808894908387	2.50222116998405	0.0123416798397304	0.199471843474632
KIAA0125	56.6793680249428	1.86244304731016	0.744400279252761	2.50193759892152	0.0123515693121084	0.199494896393335
OPCML	444.621740625842	1.77966295007299	0.711365950824143	2.5017544739261	0.0123579594817404	0.199494896393335
NCOA7	2509.96670433394	-0.601464994143555	0.240525321849664	-2.50063065925129	0.0123972393030037	0.20000879408846
TARS	5084.02363105537	-0.44036510586335	0.176169941118703	-2.49966085625602	0.0124312249198551	0.200332328532664
KB.1027C11.4	2.17508484485169	-1.92736703101068	0.771060060543554	-2.49963281673804	0.012432208758244	0.200332328532664
RP11.532F6.5	2.65371625762349	1.97007263651913	0.78821801220337	2.49940068105272	0.0124403564830334	0.200341476054047
KIF27	115.826124372496	0.645361796598995	0.258228200849116	2.4991917787325	0.0124476927828979	0.200341476054047
NELL2	336.888058768798	1.27491206604879	0.510265938423205	2.49852473004263	0.0124711440727652	0.200510941682467
ATP6AP1	11021.3150329625	0.527435306908956	0.211103512739923	2.49846769512902	0.0124731510517237	0.200510941682467
RP11.465B22.3	17.4734946182592	1.40111280954422	0.560890739628473	2.49801380295974	0.0124891330811392	0.200647782790407
PTPRF	3351.31454412147	0.85125829590873	0.341019980935161	2.49621237317054	0.0125527423008531	0.201549171360141
SEMA6D	845.532429354346	1.14415976366191	0.458468087207767	2.49561484340219	0.0125739045831291	0.201768354188778
RP11.701H24.3	7.58958734837822	1.34256294037022	0.538087538180428	2.49506417656534	0.0125934351164599	0.201961106924386
STPG2	2.62705752417559	1.12443825575536	0.450754409756711	2.49456961799279	0.0126109985415032	0.202059524221771
PHKA2	1415.26944770142	0.53573979237176	0.214771177705614	2.4944678242911	0.0126146162653529	0.202059524221771
XKR7	2.1786506554071	1.47919913232088	0.593080474630842	2.49409514491537	0.012627869041922	0.202151262338564
RP11.158L12.4	40.1422888026837	0.740320307723828	0.296965224545228	2.49295286630801	0.012668566200354	0.202665211662042
KIR2DL3	3.22990253585867	-1.23097880984381	0.493819491390971	-2.49277080249798	0.0126750634946106	0.202665211662042
TMED1	1337.86965469039	0.556960619966989	0.223502951699355	2.4919609147542	0.012704001640545	0.203007074401143
RP11.362K2.2	29.1934707528833	1.647837712882	0.661557510754951	2.49084574824271	0.0127439434107047	0.203524261532907
CSNK1G2	3793.68760653078	0.328934279942453	0.132108538770727	2.48987902676991	0.0127786582368125	0.203849541317336
TOR1A	3041.49584643227	-0.286407388711682	0.115036369853098	-2.48971163708856	0.0127846776680223	0.203849541317336
TTC34	20.5443122923026	0.954659020048414	0.383492600954795	2.48938054520887	0.0127965913170521	0.203849541317336
C10orf35	74.6942728459426	1.0546460856306	0.423696344282206	2.48915549983633	0.0128046947115843	0.203849541317336
TPTE2P1	13.4788507562613	1.13388255731413	0.455551828682389	2.48903085427997	0.0128091848808035	0.203849541317336
NAA10	2199.60819519097	0.66451695460561	0.26699001699293	2.48892060493486	0.0128131576092829	0.203849541317336
RP11.981P6.1	19.6853981022973	1.04181519303563	0.418627272127038	2.48864625503777	0.0128230482751565	0.203849541317336
SLC2A4	85.4863429536982	0.899898972681435	0.361609752303763	2.48859154640689	0.0128250213992368	0.203849541317336
VARS2	1504.92111285948	0.363326086446262	0.146021152781189	2.48817434684071	0.0128400769767854	0.203968153607575
P3H2	1284.2682222658	1.00444497928285	0.403773107600584	2.48764704824387	0.0128591280964238	0.204150058466984
RP11.262H14.5	2.95902762166416	1.24823984441911	0.501864202588679	2.48720637570987	0.0128750686262554	0.2041911712819
RP11.737O24.5	36.6406273923154	-0.973876611388939	0.39156246012996	-2.48715520651727	0.0128769207114712	0.2041911712819
MACC1	24.9722247811234	1.21324219227402	0.487875479451434	2.48678657439023	0.0128902704363032	0.20428226811798
TMEM63C	44.2036442585505	1.39818449846221	0.562326185043171	2.48642964822076	0.0129032079053364	0.2043230179118
IL9RP3	3.88965166262101	1.27907847359926	0.514509811520011	2.4860137648697	0.0129182968798502	0.2043230179118
DFNA5	1825.95052317826	-0.790559493724572	0.318013004028185	-2.48593448604544	0.0129211750249734	0.2043230179118
TJP3	18.2854024985113	0.935592548549584	0.376379338148504	2.48577021563398	0.012927140517481	0.2043230179118
C1orf210	2.72212830024388	1.1222584149277	0.451491777578485	2.48566744880003	0.0129308737417192	0.2043230179118
TADA1	590.175709873883	-0.611623624359211	0.246116851605315	-2.4850944596839	0.012951706281906	0.204448987764364
SPAG6	26.323437372385	1.6893448237604	0.679808746481399	2.48502955059673	0.0129540680952628	0.204448987764364
EFCAB12	17.6875969080918	0.804835151304904	0.324048257985808	2.48368917736985	0.0130029248034643	0.204777613174882
RP11.150O12.6	25.3314973305018	1.18554660780357	0.477392095039432	2.48338131301828	0.0130141694739261	0.204777613174882
KTI12	690.407262023884	-0.571209513597458	0.230023563564501	-2.48326521311928	0.0130184122273655	0.204777613174882
C6	209.644328527214	-1.66467686381068	0.670396688714951	-2.48312214519081	0.0130236421828655	0.204777613174882
RP5.902P8.12	12.1648237017594	1.0583196078644	0.426221800309432	2.48302552121003	0.013027175396297	0.204777613174882
DSC3	308.440294971957	-1.88963880802603	0.76103149855044	-2.48299684260807	0.0130282242392964	0.204777613174882
MT1E	2396.1473828458	-1.10258671974673	0.444054963748759	-2.48299604724284	0.0130282533287124	0.204777613174882
SULT1B1	99.5857193841129	1.05442169591983	0.424794897045488	2.48219011869843	0.0130577586214852	0.205117913402063
AC006116.22	2.38272297572374	1.26730857712581	0.510602263685065	2.48198777651223	0.013065175706609	0.205117913402063
RP4.755D9.1	59.5596221828548	-1.6875578176058	0.680041008935528	-2.48155301729132	0.013081124910245	0.205175778754848
RP11.164P12.5	11.7675487802638	1.05199101092556	0.423938476587175	2.48147094218574	0.0130841377785367	0.205175778754848
PLIN2	8876.65668995317	-0.895967545297109	0.361157962662988	-2.48081902636375	0.013108090548383	0.20534318355482
IGLV2.8	585.98912447807	2.38763261772432	0.962499252171293	2.48065919255322	0.0131139690974813	0.20534318355482
SCRG1	348.134425713909	1.66402603977757	0.670872157032338	2.48039216165795	0.0131237954637608	0.20534318355482
TIAM2	558.819090263114	0.54575805643581	0.220057881478339	2.48006593887677	0.0131358088449199	0.20534318355482
PGM5P2	24.2092435650315	0.869674978968269	0.35070837782631	2.47976676336766	0.0131468347388536	0.20534318355482
ANGPT4	40.8080112180624	1.20077553387424	0.484233598744348	2.47974435683096	0.0131476608446437	0.20534318355482
TMEM26.AS1	11.8775920301937	1.10951191063496	0.447433201515649	2.47972637452153	0.0131483238669604	0.20534318355482
BTN2A2	766.889657455637	0.457880214017293	0.18472304050863	2.47873905039963	0.0131847727134522	0.205792774333964
C9orf163	5.33526777542861	1.10623893454356	0.446339590615179	2.47846921448051	0.0131947497240642	0.205793114468173
AC092652.1	2.55036075445776	-2.19528378661855	0.885793652572879	-2.4783241336649	0.0132001167533565	0.205793114468173
RP1.269M15.3	12.2124337385143	-1.66909179564027	0.673586291285125	-2.47791829678695	0.013215140282841	0.205885331061868
MLYCD	687.591190140488	0.366939449225257	0.148093792138279	2.47775037648193	0.013221360884585	0.205885331061868
KLHDC4	1078.24401693035	0.446174902685372	0.180100009371855	2.47737301203659	0.0132353497840872	0.205983757763702
TSEN15	1478.40538006009	-0.527505069505791	0.212978514618894	-2.47679945768104	0.0132566365023185	0.206177851005649
TMPRSS4	3.62630331307806	1.29714911566643	0.523794741230924	2.47644547293109	0.0132697892816107	0.206177851005649
PIGK	2380.1847093172	-0.317919656768038	0.128378886033969	-2.47641700741909	0.0132708474569566	0.206177851005649
PARP4	2789.63359749557	0.415037554526718	0.167639084250922	2.47578037294388	0.0132945331699916	0.206426445093823
TEP1	1484.10117424242	0.536293716084506	0.216673855807642	2.47511964046376	0.0133191549498363	0.206689278025709
TAOK3	2059.42408680076	-0.396961290887265	0.160395054152483	-2.47489732763135	0.0133274483555343	0.206698566816606
LINC00863	122.513372455625	0.514681067450073	0.20799682001057	2.4744660395477	0.0133435506253415	0.206828884534289
FCAMR	6.89792800079778	2.46477465119884	0.996268167603993	2.47400723153343	0.0133606992346589	0.206975261154214
FAM181B	37.1682888929333	1.58043465089262	0.639089907387179	2.47294571956861	0.0134004494597119	0.207422639657687
PON2	1906.6499531923	0.448578534393041	0.18140335611042	2.47282378899314	0.0134050220551614	0.207422639657687
DEPDC5	710.958031227168	0.294116361814317	0.11898016425893	2.47197811203428	0.0134367742868106	0.207794260732474
SLC22A5	427.030063706227	0.510073573865381	0.206420311682988	2.47104352137948	0.0134719422174441	0.208114996405615
RP1.137D17.1	16.3526384488473	1.10647438041271	0.447817105246861	2.47081758925391	0.0134804560685445	0.208114996405615
RUNDC3A	209.015363611488	1.11797969548825	0.452475048072614	2.47080960651964	0.0134807569706563	0.208114996405615
PRUNE2	4646.82822249169	1.26252753542868	0.511133731929663	2.47005324939583	0.0135092941192948	0.208404598100291
ZNF217	2685.56640327024	-0.591197040738389	0.239361997608021	-2.46988681012987	0.0135155809881727	0.208404598100291
FAM198B	10775.2838848943	-0.699953376089975	0.283416814210759	-2.46969601305823	0.0135227910985335	0.208404598100291
CHRNB4	50.0226562382498	1.80809683358805	0.732542780549266	2.46824742745034	0.0135776432456785	0.209129961505399
LINC00948	1.38836926220133	1.9168295350722	0.776765653478208	2.46770634938479	0.0135981820772144	0.209291787344579
RP1.12G14.7	27.9084821973988	0.753627940621275	0.305414199899506	2.46756025381024	0.0136037324362905	0.209291787344579
RNF19B	1321.87356227144	-0.398691765183641	0.161593142577493	-2.46725670919139	0.013615270886717	0.209349402724094
FAM71E1	27.3048786034735	0.80526216240405	0.326430519450126	2.46687155282085	0.0136299240373794	0.20945481664307
SLC26A6	603.096538831029	-0.445882641733154	0.180765599025914	-2.46663438251453	0.0136389540343567	0.20947374686729
IGKV1.27	453.279626140623	2.72485303785091	1.10478117324055	2.46641878396456	0.0136471672956408	0.20948011879743
RP11.46I8.3	1.65018532842587	1.69845035183733	0.688964680812541	2.46522122125946	0.0136928682188656	0.210061579723111
GRAMD1B	521.857719844564	0.887033071794019	0.35986361188733	2.4649146023459	0.0137045910042292	0.210084657987069
EHF	14.6272240344089	1.72841898990433	0.701333437369983	2.464475380478	0.01372139896563	0.210084657987069
GCSAML.AS1	13.5267369060835	1.78665537026401	0.72496425670965	2.46447373608871	0.0137214619266347	0.210084657987069
RP11.638L3.1	2.09485118578674	1.54033447061943	0.625047006374976	2.46434980874919	0.0137262076381951	0.210084657987069
CTSE	3.04960786721456	2.09236312690764	0.84911819112409	2.46416005307542	0.013733477009355	0.210084657987069
CCL17	84.8625361800962	-1.49239711196284	0.605737168384734	-2.46377008025194	0.0137484271963521	0.210193654723057
XXyac.YX155B6.5	2.92444620354904	-1.6569378087908	0.672659430856904	-2.4632640721026	0.0137678471928726	0.21037082553751
RBM26.AS1	59.1949639090461	0.525431386592275	0.213336859837335	2.46291891140099	0.0137811079480475	0.210453736043463
RP4.657E11.10	29.6498916339129	0.885652627334537	0.359624690921189	2.46271362810466	0.0137890000903991	0.210454613879717
RP11.264E20.1	4.73866174989942	-1.23645063520616	0.502157660868418	-2.46227575831041	0.0138058473873158	0.210567587388286
TCTN2	783.440852456887	-0.441286649295902	0.179241960772641	-2.46196062235477	0.0138179836735537	0.210567587388286
TEKT2	8.83925228412854	0.959138816813315	0.389591277278522	2.46191039879884	0.0138199187166089	0.210567587388286
ITGAD	63.2979838377407	-1.05883590892424	0.430163626192525	-2.46147243618954	0.0138368029442445	0.210660534225665
KB.1732A1.1	79.7475124667183	0.818047892347938	0.332368191479343	2.46127010141035	0.013844609454571	0.210660534225665
SLC7A3	56.5469315227598	2.26942079622095	0.922100637276517	2.46114220560982	0.0138495459549745	0.210660534225665
EFCAB2	347.821143532396	-0.408571055390564	0.166041050028427	-2.46066292233526	0.0138680590772175	0.210779979997707
RSG1	131.481312045753	0.507581992755808	0.206289471126206	2.46053271640448	0.0138730922729486	0.210779979997707
MAT1A	142.014078041722	2.31282516334621	0.940092822122516	2.4602093632886	0.0138855986766173	0.210850735811924
ZFR2	7.62436192716538	1.13795665528206	0.462621570958768	2.45980024866476	0.0139014363616778	0.210966847562476
PCDHGA8	15.1363422726079	0.974143080013177	0.396056517873729	2.45960623307746	0.013908952685323	0.210966847562476
DSCAML1	57.4307619447268	1.21897961319842	0.495706190603893	2.45907684088714	0.0139294800292256	0.211158968704886
AC008073.9	1.17403899860766	1.60989478922961	0.654997989605159	2.45786218397415	0.0139766798325359	0.211754976684478
TTLL13P	7.73253940600862	0.701065326126184	0.285279982411232	2.45746413821492	0.0139921779962296	0.2118702848561
MPDZ	1803.53779845123	0.684615839348292	0.278700399897699	2.45645804455103	0.0140314185367401	0.212344768864177
PXDNL	841.892297352039	-1.37248888492207	0.5589404522425	-2.45551897239781	0.014068132654901	0.212780506405378
ANKRD20A4	2.4024608673793	1.94746899320016	0.793260347854411	2.45501870661709	0.014087725719983	0.212956943325934
PLEKHB1	74.9092830010226	0.766538990649001	0.312362645862913	2.45400338613284	0.0141275651136924	0.213417660025528
TMEM155	24.686424788864	-1.40464097774593	0.572426299672443	-2.45383725127532	0.0141340934102231	0.213417660025528
ENSG00000223249	1.67132641551689	1.29523587106932	0.527926904807147	2.45343788936553	0.0141497972941454	0.213534749952435
TEX15	36.4809032982022	2.1302421070561	0.868351466790903	2.45320263571232	0.0141590552457115	0.213554487372433
PLCXD2	12.0257545090374	1.2875666503316	0.525277130169236	2.45121399044493	0.0142375283216133	0.214617556551727
C19orf84	12.656068464815	1.15464679214691	0.471144639944816	2.45072679226946	0.0142568118588444	0.214787706198698
FAM198A	1044.43261107015	-0.940758792250073	0.383957713915106	-2.45016250007697	0.014279175610555	0.214818825835474
THNSL1	270.566400988189	0.38823872583307	0.158460966728381	2.45005905144169	0.0142832787912606	0.214818825835474
AC093627.9	18.5363169425235	0.785874759870868	0.320777273986134	2.44990784448414	0.0142892781265783	0.214818825835474
MTRR	1244.1987887919	-0.365251102574594	0.149102192793109	-2.44966955704943	0.0142987370064932	0.214818825835474
RP11.764K9.2	45.5582788743735	0.702531795317976	0.286786723546642	2.44966638144851	0.0142988631000606	0.214818825835474
AMER2	19.6943243759324	2.11773435700873	0.86467833827151	2.44915856368286	0.0143190396417058	0.21497270244572
AARSD1	183.772647498795	0.335076834829126	0.136830159255353	2.44885218765116	0.0143312246724619	0.21497270244572
C16orf87	639.255784797296	0.569547624656903	0.232581889523805	2.44880470196115	0.0143331140674664	0.21497270244572
FAM167A	160.762852488633	-1.37564910795389	0.561978937741723	-2.44786595291605	0.0143705108278094	0.215205154459003
AMPD1	18.7828462402311	2.03477555948581	0.831267792961047	2.44779790185033	0.014373225107106	0.215205154459003
RP11.770J1.4	2.20069958010915	1.11775177242909	0.456698310388682	2.44746202690744	0.0143866284124831	0.215205154459003
PRR3	898.823371028768	0.377241496038891	0.15415725828967	2.44712120742335	0.0144002403001857	0.215205154459003
CCDC116	27.1948087027144	-0.679977156969658	0.277907036598636	-2.44677920103083	0.0144139110082882	0.215205154459003
ZNF184	504.98201817249	0.443769230502783	0.181372764393693	2.44672474385143	0.0144160888312458	0.215205154459003
SRSF9P1	6.41557720552654	-0.759955832172614	0.310606770354646	-2.44668147865839	0.0144178192770163	0.215205154459003
RBM4B	715.348741528143	0.275627352696452	0.11265411702652	2.44666914953111	0.0144183124294958	0.215205154459003
HCG18	1052.29947186152	0.393979864859715	0.161030984219098	2.44660905955632	0.0144207161799644	0.215205154459003
HMCN1	2728.10119735752	-1.13395488934391	0.463644765440918	-2.44574073486096	0.0144554908311715	0.2156043279883
FITM1	23.6530613364	0.713615983936035	0.291827594489199	2.44533415417796	0.0144717989712885	0.215727782445478
ADAM21	22.5981481744543	-0.947150978679798	0.387477134570635	-2.44440482850514	0.0145091355926816	0.216085878483321
CCL24	25.3898773244431	-1.22182139424147	0.499858229493904	-2.44433585794624	0.0145119099390928	0.216085878483321
AC016582.2	11.8909727937436	1.22476030460116	0.501251032202241	2.44340704740336	0.0145493170107724	0.21652285514868
FAM110B	2149.63693186329	0.818609174270111	0.335103165649889	2.44285718006431	0.014571502501287	0.216706658501526
RP11.221J22.2	2.45667239145378	-1.50881475960464	0.617748868393361	-2.44244034558697	0.014588340386171	0.216706658501526
CDH20	11.3571590535697	1.50044449930655	0.614351199530623	2.4423237074379	0.0145930550144161	0.216706658501526
AC002398.13	39.8571201367847	-0.681146805943721	0.278895554031071	-2.44230069679718	0.0145939852856836	0.216706658501526
SLC10A3	2732.3897730499	0.63668089488886	0.260714992155708	2.44205708933153	0.0146038370245012	0.216706658501526
IGHG1	107380.811375926	1.97082322987066	0.807174683638143	2.44163161930161	0.0146210575371654	0.216706658501526
TACR1	74.2885236242972	1.05122132371612	0.430543875841468	2.44161253405726	0.0146218304144108	0.216706658501526
RGL3	153.249304540894	0.887157721450019	0.363374751016588	2.44144019078948	0.014628811269362	0.216706658501526
OR7E14P	6.73911047069255	1.15672002134395	0.473825244666207	2.44123763848594	0.0146370195128283	0.216706658501526
RP11.680G24.5	21.5854012693569	0.693553265781172	0.28411431732167	2.44110635577701	0.0146423417906436	0.216706658501526
CRIP3	21.3912591334846	0.967605927957847	0.396483700691295	2.44046836293841	0.0146682306911026	0.216753022359509
MFSD2A	378.517155908956	-1.1114353926938	0.45542016984428	-2.44046150409595	0.0146685092328839	0.216753022359509
FANCF	539.552990759669	0.433165345442177	0.177495309692751	2.44043262997765	0.0146696818795915	0.216753022359509
HSF2	1020.6471494788	-0.567359546747755	0.232522227596702	-2.44002284259814	0.0146863332316556	0.216879759905846
RP11.524F11.2	4.23660023420619	0.9510618885847	0.389876905309304	2.43939016554516	0.0147120742283755	0.2171405153421
LRRN4CL	3184.2396256847	-0.985698656890568	0.404281568697978	-2.43814888733388	0.014762692241658	0.217658565286556
IGLV1.51	1456.97973690453	1.92176112423138	0.788210433727596	2.43813205458726	0.0147633797167785	0.217658565286556
FAM13B	1444.29111026184	0.536231441714782	0.220037734942332	2.4369976443146	0.0148097758409996	0.218171250173921
HUS1B	8.55926143266297	0.968342694161732	0.397427004308564	2.43652968636703	0.0148289522063283	0.218171250173921
MIS18A	592.333742669615	0.533321813204701	0.218886654750354	2.43652046221351	0.0148293304210699	0.218171250173921
EDN3	116.73515049863	2.82460791610008	1.15929459179423	2.43648847850524	0.0148306419037146	0.218171250173921
AC005592.1	8.81109842148	1.58873513751037	0.652313404016183	2.4355396159711	0.0148695962576218	0.218624572891209
AC012531.25	28.25750841762	1.29639079279361	0.53237001361611	2.43513112992205	0.0148863938783715	0.218719463063681
HHIP.AS1	125.235543005761	1.48071175174332	0.608307789984424	2.43414892283598	0.0149268523066415	0.218719463063681
FAM168B	6218.1204584114	0.423993055357634	0.174188858601378	2.43409973957015	0.0149288807759192	0.218719463063681
NFKB1	3032.18924338638	-0.391297981548296	0.160769606421196	-2.43390520297191	0.014936906444286	0.218719463063681
VPS37A	1792.38217247482	-0.399517846926255	0.164154012039597	-2.43379885731873	0.0149412953743027	0.218719463063681
NCMAP	5.19387568363198	1.65063565263049	0.678225929484359	2.4337548608403	0.0149431114597705	0.218719463063681
RP13.20L14.4	3.41523244525198	1.48168022510935	0.608819497733252	2.43369378054731	0.0149456330528866	0.218719463063681
CAMP	3.35660333835949	-1.72416669168261	0.708481730103391	-2.43360783831503	0.0149491816625072	0.218719463063681
TAL1	276.511626988609	0.877410801065043	0.360554901709295	2.43350124185103	0.0149535841298365	0.218719463063681
RP11.506M13.3	26.2100325677941	-0.610251260777961	0.25078058780506	-2.43340709151033	0.014957473518278	0.218719463063681
RP11.649G15.2	3.66681988376667	0.962551283707135	0.395632531856031	2.4329427087088	0.0149766704000797	0.218881023007041
NLRP12	31.3651635536246	-0.834030828110925	0.342865780255686	-2.43252863405897	0.0149938059205623	0.218896803270521
AC018804.7	31.9629859491394	1.25602941116082	0.516400432685531	2.43227799912727	0.0150041862554283	0.218896803270521
RP11.30L15.4	8.64236487669785	1.08469546603455	0.445977895617257	2.43217315632487	0.0150085303186117	0.218896803270521
TREX2	54.407543752005	0.765568860205396	0.314796489110921	2.4319485340119	0.0150178410631795	0.218896803270521
FAM196A	56.4893936731729	-1.12016787881824	0.460608078642304	-2.43193276618175	0.0150184948413212	0.218896803270521
CTB.79E8.3	28.7798907972514	-0.523977685359525	0.215514767972998	-2.43128436295918	0.0150454011662831	0.219049132747383
MPZL3	134.092855023393	0.641733097578349	0.263968857376853	2.43109397053678	0.0150533098044089	0.219049132747383
PBLD	254.416388809962	0.53508878752484	0.220102276885614	2.43109155932505	0.015053409986288	0.219049132747383
CTD.2541M15.3	10.883162812702	0.766930215397263	0.315533507144536	2.43058248341897	0.0150745744073789	0.219238342030867
SIRPB1	78.5535965595405	-1.02891576802005	0.423436068248988	-2.42991999305792	0.0151021561541481	0.219426616601918
C6orf136	518.293223147519	0.324189951726649	0.133418136972109	2.42987916848532	0.0151038572741027	0.219426616601918
U91328.19	108.464620875357	0.838058333177564	0.34501204538225	2.4290697800103	0.0151376185568168	0.219477981811829
MMP21	9.11879668325122	1.26947144477676	0.522634614864303	2.42898462648971	0.0151411743488186	0.219477981811829
LRRC37A17P	211.241673827548	0.701386518965046	0.288760539256974	2.42895556563865	0.0151423880235526	0.219477981811829
GBAP1	174.151243101556	0.603337910286858	0.248405028505794	2.42884741068269	0.0151469056756272	0.219477981811829
FBN2	7110.91745206754	1.17296072544599	0.482935326288938	2.42881533322376	0.0151482457850916	0.219477981811829
COPZ1	8665.97433393058	-0.410201818267028	0.168935899228719	-2.42815067809634	0.0151760367838852	0.219762102473706
IGLV2.11	710.968111890076	2.30423543137999	0.949104582580448	2.42779928963695	0.0151907474048101	0.21985660387285
FBXL22	61.6360559735156	0.798335065192448	0.328912314246668	2.42719725170806	0.0152159804699283	0.22007795149225
CTD.2267D19.3	313.265659817557	-0.59344153540274	0.244512104842587	-2.42704358454886	0.0152224269925024	0.22007795149225
RP5.1136G13.2	161.148958996171	-0.442476180516181	0.182364676076846	-2.42632613966165	0.0152525565050486	0.220355006989023
RP11.706O15.5	6.98905481806199	2.21219538155152	0.911795551539847	2.42619672558783	0.0152579969101177	0.220355006989023
RP11.673C5.1	312.040293934576	0.270997123358342	0.111705679602871	2.42599234275083	0.015266592387667	0.220360668843369
IL36RN	4.94495765411695	-2.31435452862742	0.954074678001202	-2.4257582577037	0.0152764422518934	0.220384420929302
LDB1	2605.82767842949	0.448643743299176	0.184982045723039	2.42533669441033	0.0152941949645967	0.220522096156198
COX10	547.050034389639	0.320971178719874	0.132491586476111	2.42257781989611	0.0154108246568668	0.222070322283931
NCAPD3	1073.04004698268	0.51990454673027	0.21463021917339	2.42232686866085	0.0154214722047337	0.222070322283931
EGR2	546.445137874347	-1.05950205656361	0.43741105619141	-2.42221142233765	0.0154263726223593	0.222070322283931
KLF3	4557.73949083417	-0.375449018127865	0.155069960434395	-2.42115892127738	0.0154711119939046	0.222568117656679
POM121C	1568.97649023157	0.353264978088063	0.145916467005631	2.42100830247233	0.0154775237801607	0.222568117656679
EMR3	7.64320887254354	-1.47539479209388	0.609550351720943	-2.42046417974889	0.0155007063697632	0.222782222848892
FAM86B2	4.45682089595275	0.925496018179708	0.382496662602032	2.41961854486202	0.0155367956684119	0.223132470651342
CACNB2	171.161206802975	1.1247927508644	0.46492044499709	2.41932305401505	0.0155494238007702	0.223132470651342
RP11.513G11.4	8.30233897606697	1.97491238641846	0.816331165676437	2.41925393695092	0.0155523788989781	0.223132470651342
PLCG2	1328.07468542395	0.660967657291728	0.273245276964868	2.418953639871	0.0155652238311123	0.223132470651342
AC009784.3	3.95446215494635	-1.40961424962819	0.582744989222923	-2.41892127036197	0.0155666089643591	0.223132470651342
EDRF1.AS1	5.30310557105648	1.08577855580008	0.448914583126167	2.41867517031614	0.0155771434517451	0.22316438794708
RP11.353N4.5	3.7776213892026	1.42260476278917	0.588251364101356	2.41836202957628	0.0155905567322096	0.223237491972609
NOG	20.578090697118	1.65251557312187	0.683453823016724	2.41788913525681	0.0156108322667431	0.223408724746539
LINC00982	21.5123822521102	1.12336097103867	0.464688578643483	2.41744906732586	0.015629721193194	0.223559941795302
AMOT	1356.62425962193	0.953740501870185	0.394638655749544	2.41674374259848	0.0156600376148719	0.22384405259174
SLC25A47	3.68457021872965	1.0874823577169	0.450056307019881	2.41632511477917	0.0156780556214976	0.22384405259174
DKC1	2754.70524528086	0.50851477132362	0.210451185269382	2.41630747136306	0.0156788154056638	0.22384405259174
RP11.15H20.6	73.6663662308753	0.626878656558399	0.259454353729306	2.416142367811	0.0156859268835834	0.22384405259174
LRRC39	42.6276137120912	0.597883401047728	0.247466366167039	2.41601883241037	0.0156912497591485	0.22384405259174
ZIC5	1.74733192366901	2.8176731341501	1.16640371445681	2.41569286793833	0.0157053024980769	0.223895690008141
ZSWIM3	245.949867852747	0.375027836034217	0.155263994116141	2.41542051116943	0.0157170526298975	0.223895690008141
RP11.244F12.1	5.16847852710345	-0.67956085813471	0.281350286929202	-2.41535512741707	0.0157198745944216	0.223895690008141
RP4.635A23.6	11.3602882649281	0.75456923081458	0.312522502452156	2.41444767942781	0.0157590861179592	0.224335225914478
CTD.2547G23.4	71.9894706747471	0.849975427742128	0.35208989216397	2.41408642127758	0.0157747202860093	0.224438843391304
ZNF259P1	3.93707630365792	1.16922797228324	0.484386857390051	2.41383091726151	0.0157857859674853	0.224477386267121
RP11.438B23.2	35.7830424195408	1.52096486432692	0.630159812082087	2.41361768104754	0.0157950262891508	0.224489945068344
SNHG8	1550.07936169147	0.635058500599271	0.263162591913112	2.41317922879004	0.0158140410119627	0.224641337738414
P2RY12	85.4292350087636	-1.00008541811207	0.414500770585344	-2.41274682481238	0.015832813148762	0.224699190104064
SUPT20H	1531.85702263326	0.373961556384505	0.154997116701077	2.4127000833552	0.0158348435286648	0.224699190104064
NSUN7	70.2677081534972	0.888304374266925	0.368285588658327	2.41199873582629	0.015865336537383	0.224907051356924
CPN2	28.3927862471704	-1.75662049410698	0.728290417791666	-2.41197803952087	0.0158662371499282	0.224907051356924
ERO1LB	484.482781071402	0.458427594824639	0.19016929884383	2.4106288323706	0.0159250458194699	0.225621614347363
TMEM130	109.135785588241	1.6195795435171	0.672366456470723	2.40877504808662	0.0160061603410592	0.226651280485784
PCBD2	259.098014747247	0.29444429421083	0.122248651498031	2.40856885211181	0.0160152050996152	0.226659873227537
CTD.2035E11.4	38.1618974594718	0.984575002281762	0.408843576509495	2.4081948668182	0.0160316213801767	0.226695053196101
SLC25A11	3702.0059808471	0.430057260091971	0.178585733707435	2.40812774438357	0.0160345693199536	0.226695053196101
TEKT5	9.71110427818973	1.03795934160265	0.431080400526691	2.40780917048067	0.0160485672169525	0.226698742261522
RP4.665J23.1	383.349206957041	-0.831821237349473	0.345478345557183	-2.40773770063047	0.0160517090232081	0.226698742261522
CLLU1OS	6.43667448145768	2.16083789278542	0.897561607861518	2.40745356514714	0.0160642049342746	0.226703571565349
SPARCL1	28481.5690972093	-0.779820460295402	0.323933661394024	-2.40734617371811	0.0160689300968068	0.226703571565349
TXLNB	380.673230670564	0.999078801687574	0.415235506928015	2.4060533962496	0.0161259075318331	0.227387993763833
FAM184A	221.411172104215	0.899542338468086	0.373941876114716	2.40556727108073	0.016147378745817	0.227571294790208
LOC100421166	6.64159022706592	-1.61418926189168	0.671195598493198	-2.40494613718483	0.0161748495971213	0.227777253668724
HAUS7	250.969097827024	0.72528934414637	0.301593986659862	2.40485346600876	0.0161789516789489	0.227777253668724
RP11.458D21.1	39.9663338250774	0.861537812462513	0.358311562412345	2.40443765381776	0.0161973688279556	0.22791628642739
CTD.2525I3.5	3.40447999572461	1.07482409452038	0.447052180547881	2.40424751581155	0.0162057965555921	0.22791628642739
WDFY2	1285.93827858181	-0.441300862058359	0.183608426796887	-2.40348915219746	0.0162394488167713	0.228270054482528
RAC1	16854.7564145817	-0.372537648038129	0.155016716127136	-2.40320952053064	0.0162518729139562	0.22829967719365
ANKS1A	2439.93317263826	0.450955830620844	0.187659058329959	2.40305922151614	0.0162585541832869	0.22829967719365
IGSF10	311.38461123286	1.35564323375957	0.564277016857205	2.40244275995849	0.0162859831196023	0.228531357552555
SLC7A6OS	230.88262264766	0.297238096609942	0.123735674260619	2.40220210045392	0.0162967020912207	0.228531357552555
DLL1	755.741568718021	0.801182710682694	0.333534419375827	2.4020990462754	0.0163012940184698	0.228531357552555
ANKK1	11.9803825310011	1.52388686542024	0.634446362354414	2.40191599454545	0.0163094533103039	0.228531357552555
MDN1	1832.23450995221	0.512376889548213	0.213336280017964	2.40173349561111	0.0163175915339811	0.228531357552555
UTS2R	15.6459603239455	2.1381547946896	0.890345482415277	2.40148890168942	0.0163285043715785	0.228565025757864
ZBTB5	733.662305629556	0.340408635333659	0.14181789974347	2.4003220746423	0.0163806520026116	0.229175559424038
P4HA2	10144.9991599351	-0.789194562185064	0.328883259519016	-2.39961913336435	0.0164121383064652	0.229332459072406
CAST	9291.22688670924	-0.328387359345947	0.136855824791585	-2.39951320921883	0.0164168874912258	0.229332459072406
RP11.86H7.7	35.9718421650275	1.05876144581421	0.441252453330002	2.39944602647316	0.0164199003032915	0.229332459072406
ZNF737	161.109172881076	0.693665283768416	0.289110359600287	2.39930967789412	0.0164260163522935	0.229332459072406
P2RX5	80.7498287861001	1.19054512843364	0.496270574186591	2.39898392199657	0.0164406365547903	0.229410223871487
C19orf52	883.143027440289	0.416212760272295	0.17352331795811	2.39859844296415	0.016457951948387	0.229410223871487
CCL3	642.188090031828	-1.01004677640098	0.421128584140355	-2.3984284478404	0.0164655930748261	0.229410223871487
DNASE1L1	807.259782681648	0.62047622299496	0.258716800986057	2.39828345368417	0.0164721128928038	0.229410223871487
RP11.85B7.2	3.23785485866785	1.39819934289846	0.583051538605324	2.39807161171891	0.0164816426712261	0.229410223871487
CTD.2171N6.1	34.6944948975605	-1.00687957858186	0.419891831085762	-2.39794991004767	0.0164871196497134	0.229410223871487
CCDC176	366.723262199361	-0.397792796348562	0.16590645363216	-2.39769332439911	0.0164986720926904	0.229410223871487
CHCHD6	490.164569121432	0.475224446648858	0.198224112320774	2.39740988664301	0.0165114417822107	0.229410223871487
DUOX2	1157.11711186618	-1.88867855160685	0.787947696185809	-2.39695929152317	0.0165317602640652	0.229410223871487
SYT13	11.0312700557541	1.73111091162819	0.72223523776697	2.39687960529383	0.0165353558034491	0.229410223871487
IGHV4.61	105.05734403401	2.76586775938114	1.15394831216053	2.39687317900975	0.0165356457951124	0.229410223871487
TESPA1	321.169866229454	1.29053538867322	0.538437184327547	2.39681698485398	0.0165381817956185	0.229410223871487
RP11.329A14.1	4.61337722322462	1.28044311956929	0.534286985144032	2.39654559285982	0.0165504343239533	0.229410223871487
RP11.762I7.5	17.5262449129963	0.769248416121557	0.320984299618182	2.39652972758043	0.0165511508399576	0.229410223871487
AC090945.1	7.02544958211375	1.36582598241788	0.570025363856272	2.39607931334485	0.0165715040510546	0.229573874068814
AC073072.7	6.2857584501708	0.971380616883749	0.405436484451734	2.39588851555216	0.0165801324018512	0.229575008545633
ASXL3	253.147279931486	1.53874650082084	0.642414475352178	2.39525502593522	0.0166088086813241	0.229734941662886
DAND5	6.92325544891975	1.30422560744462	0.544524821337918	2.39516282148551	0.0166129861444133	0.229734941662886
C12orf43	878.052935203575	-0.358835315550686	0.149822678973004	-2.39506674163358	0.0166173401701656	0.229734941662886
SEC11C	1090.14519597154	0.595859149331984	0.248860899713368	2.39434619909467	0.0166500247585864	0.230068397667257
SPEF1	12.3387489924859	-1.0144637717098	0.423789365885703	-2.39379241994337	0.0166751831310389	0.230285410591117
RP4.612B15.3	81.6916181056756	-0.681321512336708	0.284640248095413	-2.39362323808938	0.0166828757728506	0.230285410591117
TMBIM6	31184.9471174898	-0.187778103474534	0.0784794921616168	-2.39270283614773	0.0167247807506111	0.230745280186398
HOXC13.AS	30.0477071841259	2.57366991476071	1.07607920060761	2.39171049241308	0.0167700646719786	0.231085517816888
ATRNL1	198.706279464096	1.2561376524518	0.525258786515269	2.39146433091659	0.0167813144826103	0.231085517816888
RP11.701H24.7	6.09761044308491	1.05455513838164	0.440966584487579	2.39146269916818	0.0167813890771372	0.231085517816888
CTD.2256P15.4	15.9752844851324	-0.734132794133971	0.30698757535617	-2.39140881608066	0.0167838524778776	0.231085517816888
CTD.2540F13.2	3.87755726481578	1.463775789751	0.612322348676039	2.39053138092373	0.0168240113283013	0.231458050669843
ITPR1	1247.38049981087	0.776121525347186	0.324677101592497	2.39044121541191	0.0168281428396323	0.231458050669843
JPH2	263.475317883147	1.16810358443026	0.488778099764317	2.38984435880721	0.0168555141209692	0.231696340272889
RP11.632F7.3	3.45846227961103	1.23471720341513	0.516685656362676	2.38968740124739	0.016862718533002	0.231696340272889
SETD1B	1753.44198061046	0.458768096934478	0.192008589419966	2.3893102820054	0.0168800395002518	0.231815757185973
ANKRD36BP2	81.9083672132014	1.57685209998439	0.660031727017841	2.38905500362677	0.0168917732166428	0.231858360830587
CLIC3	220.364537256992	1.03266413449601	0.432314867827079	2.38868521845302	0.0169087828643625	0.231973301993107
CLUL1	21.0474572851659	1.35075469958042	0.565581855013204	2.38825677946985	0.0169285093100949	0.232125378809478
CDAN1	1176.93965401855	0.591395656983709	0.247689828486849	2.38764611609842	0.0169566607505042	0.232199199208316
CACNA1G.AS1	10.9575684273577	1.29024686234898	0.540412771323264	2.38752104098069	0.0169624317510877	0.232199199208316
IGKV1.6	349.934486912839	2.34952273194446	0.984137777344362	2.38739207663028	0.0169683840067657	0.232199199208316
JAK1	11114.1519883456	-0.317448767811984	0.132975703883711	-2.38726894117137	0.0169740689447146	0.232199199208316
RRM2P3	3.24547198923977	1.14754626812623	0.480775632820613	2.38686445357849	0.0169927551587353	0.232199199208316
CHGB	182.55585530042	1.65347726956438	0.692741065247964	2.38686192072723	0.016992872226346	0.232199199208316
XXbac.BPGBPG55C20.3	3.0138460677059	-1.00633849079307	0.421639999111799	-2.38672444007438	0.0169992276019633	0.232199199208316
DCAF8	2895.49809796378	-0.562010800555499	0.235481833379448	-2.38664185890677	0.0170030461187833	0.232199199208316
MTMR7	75.6766971769493	-0.564885766869691	0.236718163523205	-2.38632202304289	0.0170178422919703	0.23228317055229
PGBD1	323.733539846422	0.400334098214401	0.167798780671668	2.38579861314807	0.0170420805349672	0.232409209738306
VWCE	778.539528667718	-1.22151386907549	0.512004354413444	-2.38574898542585	0.0170443802838382	0.232409209738306
IGIP	873.641372446206	-0.363026674161608	0.152187554967157	-2.38539001589159	0.0170610230436117	0.232518113139269
LINC00973	10.3474398318611	-1.4278760468725	0.598660442602048	-2.38511841648717	0.0170736245709844	0.232571857619565
CTD.2337I7.1	3.97338834470776	2.30484224768322	0.966456422401339	2.38483825474139	0.0170866319255313	0.232612140782791
RIOK2	1218.1919750188	-0.240460124128191	0.100843852054466	-2.38447975984017	0.017103288813444	0.232612140782791
HTRA4	17.1519287364689	1.19701668964997	0.502036611896231	2.38432150422007	0.0171106464373351	0.232612140782791
PFKL	9336.83875527639	0.327475399562153	0.13734603025991	2.38430917109471	0.0171112199459011	0.232612140782791
PPP1R2P1	3.74387956182564	-1.10740821928832	0.464514706434942	-2.38401110653193	0.0171250855187943	0.232682876684801
ZNF559.ZNF177	37.9819065059419	0.839471196494138	0.35220483487722	2.38347436879105	0.0171500787136201	0.232904658445533
HNRNPF	9077.9651103663	-0.271568123545593	0.11398152438751	-2.38256265657868	0.0171926059436418	0.23330741235621
SOX11	1041.47502002359	1.32438395848845	0.555887806632892	2.38246628669635	0.0171971065618828	0.23330741235621
MTRNR2L3	3.2796922625608	1.01298141659395	0.42543611885606	2.38104235088859	0.0172637270551358	0.233887543771612
C17orf59	700.185484909384	0.652521716347453	0.274079707350409	2.38077354451203	0.0172763288425781	0.233887543771612
RP11.350J20.9	17.23621188494	1.07108000734812	0.449903979489595	2.38068578224899	0.0172804449313538	0.233887543771612
AQP4	9.11709898250664	2.68327904127577	1.12717584199038	2.3805327805266	0.0172876228363367	0.233887543771612
ATP6V1G1	5474.52234783323	-0.247242864242766	0.103863285427755	-2.38046450412685	0.0172908267911437	0.233887543771612
C8orf37.AS1	4.16337644162904	1.00094593334365	0.420511629918545	2.38030499545884	0.0172983139630187	0.233887543771612
UBE2D2	4256.96044546456	-0.189373770892221	0.0795699583646058	-2.37996569037364	0.0173142500507082	0.233887543771612
DNAJC9.AS1	5.37309643008204	0.866975382590669	0.364299303218745	2.37984364760119	0.0173199851617395	0.233887543771612
LINC00618	4.28836603525404	0.908533828779725	0.381842972249868	2.37933887699052	0.0173437233601709	0.233887543771612
PRSS50	8.32796712348222	1.38163957234117	0.580685027308449	2.37932701441476	0.017344281572743	0.233887543771612
AGTR1	521.633314703484	-1.02349448708507	0.430170018350976	-2.37927899068502	0.017346541567554	0.233887543771612
NPTX2	1120.16549931494	1.43765506340496	0.60424146719708	2.37927242907354	0.0173468503767813	0.233887543771612
RP5.1057I20.5	9.65458757999835	1.11478985228529	0.46856830859204	2.37914052624478	0.0173530591443981	0.233887543771612
CPEB2.AS1	2.83621858497026	0.985804078448895	0.414569506187899	2.37789819013387	0.0174116325418322	0.234559314613188
ARNT2	1233.61622649341	1.22467951453631	0.515156589254015	2.37729564191295	0.0174401037366235	0.234658962060972
TMEM63A	1229.95982403527	0.369092132948426	0.155268138192306	2.37712731823506	0.0174480645423944	0.234658962060972
CFAP52	6.25558208739139	1.07170622865723	0.450878934717024	2.37692681147289	0.0174575515931871	0.234658962060972
IGLV3.21	4288.79568183165	2.36837185317394	0.996496321097212	2.37669904347082	0.0174683340062577	0.234658962060972
ZNF534	13.5932863869238	1.37191865135631	0.577239258008795	2.37668979079626	0.0174687721462171	0.234658962060972
[truncated: 24,863 more rows]
