# Supplementary material for: Identification of Subtype-Specific Metastasis-Related Genetic Signatures in Sarcoma
Source: Front Oncol. 2020 Oct 6;10:544956. doi: 10.3389/fonc.2020.544956 (PMC7573283; doi:10.3389/fonc.2020.544956)
Supplement: Supplementary file 2 [file Table_2.XLS]

TransID	baseMean	log2FoldChange	lfcSE	stat	pvalue	padj
WIF1	72.8101440717297	5.00239463347735	0.626797802131371	7.98087456029225	1.45300072600724e-15	3.97628178679142e-11
ITIH3	1221.16990391044	-4.00998846674409	0.530313971677826	-7.56153652534771	3.9833552568715e-14	5.45042499797727e-10
SOSTDC1	39.0042152346007	4.49068492944338	0.630905530345712	7.11784049029124	1.09631139058884e-12	1.00005525049514e-08
LMOD3	62.3163285938818	-3.17393428815369	0.460975367950191	-6.88525788756816	5.76829412869741e-12	3.94637842814834e-08
GATA4	37.8703732125524	4.38299129073561	0.649109040051607	6.75231897923829	1.45500544699113e-11	7.96353581247183e-08
CNTN5	84.2353092141968	3.91981823394368	0.588707004178876	6.65835161824007	2.76915658126962e-11	1.26301231671707e-07
DLEU7.AS1	17.7312107627469	-3.34817094917487	0.514818142473037	-6.50359937412312	7.84205753839207e-11	3.06579637993768e-07
IGLON5	78.6051714856991	3.42243976542258	0.54017983866444	6.335741396577	2.3620267900759e-10	8.07239574469066e-07
NAP1L6	15.565805214776	5.02437442449301	0.79528511058394	6.31770211415608	2.6548111416435e-10	8.07239574469066e-07
KCNQ2	15.8633056005256	3.90818510882915	0.645641265980414	6.05318357849156	1.42010871577844e-09	3.88626951159928e-06
MTND1P23	77.4492051981008	-2.60563604830043	0.434151358500396	-6.00167659799699	1.95290380590171e-09	4.53522260218805e-06
BRS3	16.340011886476	4.38161442190761	0.730423971264444	5.99872758053456	1.98869660258191e-09	4.53522260218805e-06
BNC1	81.1946774923321	3.82157338500356	0.648613288613374	5.89191349004495	3.81749028124381e-09	8.03611069511677e-06
TDRD9	56.1435395163251	3.07829185141504	0.52370436613134	5.87791901403212	4.15456072741162e-09	8.12097920473903e-06
MMP12	448.978773801756	-3.71132135781445	0.646469970127816	-5.74090294879539	9.417305311432e-09	1.71809318101766e-05
KCNIP4	148.950689392301	1.67446269879389	0.293063384828044	5.71365371957466	1.10575895517732e-08	1.89126247296141e-05
BLOC1S5.TXNDC5	24.755578950795	1.92294625408469	0.343604202066576	5.59639912003203	2.18849566465906e-08	3.4513113900139e-05
OR52K3P	34.8666232768434	-3.19830052350266	0.572412821718363	-5.58740196262809	2.30491799225298e-08	3.4513113900139e-05
KRT19	200.700342735178	2.73825531797528	0.490669631690555	5.58064966959722	2.3962185343223e-08	3.4513113900139e-05
SLC25A35	534.543459991586	-1.42166820778412	0.255903199622575	-5.55549211530336	2.76830711580447e-08	3.78787462655526e-05
DDX43	78.1647735577772	2.95516942470823	0.534247421318959	5.53146221541409	3.17572276383474e-08	4.13842043595721e-05
RP11.553A10.1	171.178984815088	2.77642831626518	0.507167130862675	5.47438535999476	4.39032745275878e-08	5.4611682305544e-05
LIPC	56.746000203658	-2.45768332828723	0.454603737787903	-5.40621012103043	6.43722746346518e-08	7.65918116370383e-05
MXD3	1166.12737723265	-0.984184274683995	0.182589892872052	-5.39013556119259	7.04045545011789e-08	8.02787932699692e-05
ITLN1	44.4673978549832	-3.70416502557343	0.688980163453169	-5.37630141194218	7.60314720566742e-08	8.32270905721179e-05
F3	1368.32799382413	2.20341003684642	0.411636835000876	5.35280093882205	8.66031044164579e-08	9.11530982869534e-05
SLC7A4	74.4718878950704	2.80092324503127	0.525633785110856	5.32865908617452	9.89405120093648e-08	0.000100281705616603
P2RX2	52.9757924215489	3.72336789365063	0.702907250856836	5.29709700548954	1.1765819784559e-07	0.000114994080080086
CDCA3	1014.95964882833	-0.943174253509892	0.178822139258302	-5.27437070947636	1.33212391917736e-07	0.000123477743383636
KCNK17	170.457569513656	-3.00337055937511	0.569744595708417	-5.27143316847216	1.35362577706244e-07	0.000123477743383636
GLB1L2	492.241161772315	2.82431662110849	0.537284154984275	5.25665347639212	1.46700355625787e-07	0.000129503288130816
TMEM160	303.426785376988	-1.32442972578951	0.252806882937101	-5.23889899832766	1.61537411064679e-07	0.000138144774724875
RP11.367H1.1	6.85673067976341	2.46421546058009	0.472174797362516	5.21886274817028	1.80025104995242e-07	0.000149289909796963
RP11.4K3__A.5	23.5797890260218	-1.71524902727811	0.331918398648275	-5.16768288309235	2.37014006772421e-07	0.000190768391451002
PTPRN	470.706667276535	2.8720261590596	0.558061046965998	5.14643724853024	2.65480215023713e-07	0.000207575187552541
PSG4	26.3065566812442	4.30200712492085	0.836794080581953	5.14105826600614	2.73195308759798e-07	0.000207673967208907
CALB2	150.882197059217	2.71981026037981	0.534524621772101	5.08827872393018	3.61328053221908e-07	0.000267246040661371
NDNF	389.294157733874	2.4084731027898	0.477426443088417	5.04469984362338	4.54233859250506e-07	0.000327120099796036
FTLP14	6.51777151712259	-2.96480597744809	0.588471433472412	-5.03814766326645	4.70058749333772e-07	0.000329836608570974
RP11.475O6.1	10.1428424607637	-2.55974977000098	0.510505287442686	-5.0141493789883	5.32685918137827e-07	0.000364437070893994
DKK1	52.2244972112397	2.22502388906603	0.444744248400563	5.00292898012261	5.64657474358174e-07	0.000376218376837934
COLEC11	175.243019115732	2.62040575339943	0.524225168300282	4.99862637632543	5.77401586903209e-07	0.000376218376837934
BOK	1735.00464011444	1.95461508146181	0.392107411094498	4.98489706176645	6.19948096023824e-07	0.000394546502227627
OASL	738.032475860443	-1.71633334401046	0.344629473484764	-4.98022797253972	6.35094153342189e-07	0.000394999695462781
ERAS	10.4088795437778	-1.36276500393342	0.27477745174149	-4.95952268025072	7.06665975998888e-07	0.000429747135537457
RP11.161M6.2	123.122458589391	2.06938978604355	0.417800620402416	4.95305579979838	7.30570138050631e-07	0.000434625704302034
SLC6A15	129.85414679573	3.52307058045929	0.713361933313921	4.93868598243373	7.86507448614357e-07	0.000457948145505968
NRG1	216.965823686396	2.42419082922505	0.492012468473689	4.92709226809908	8.34623479512842e-07	0.000470173241076298
TACR2	1286.19782838405	2.27636528103309	0.46285815383243	4.91806239597372	8.7405054586124e-07	0.000470173241076298
RBFOX3	920.630028527513	2.83383182899185	0.57627798340487	4.91747370296622	8.76682292652827e-07	0.000470173241076298
LA16c.380H5.1	4.41283898929708	-1.95961630911478	0.398685331548245	-4.91519540361532	8.86939501520068e-07	0.000470173241076298
RAB6C	6.20352684446001	1.7947352146792	0.36524595725752	4.913771607919	8.93408190307954e-07	0.000470173241076298
NAA38	2490.95816028476	-1.02320637445858	0.209439318245648	-4.88545504745427	1.03190248204031e-06	0.000532812138179531
LL0XNC01.250H12.3	19.3573604890675	1.72379828152925	0.353323942132402	4.878804054788	1.06731031031277e-06	0.000540889147259617
ARX	36.9537959760937	-3.32121760712039	0.683284741031586	-4.86066409460015	1.16992620932981e-06	0.00057223641534711
FHL5	452.686841875774	-2.48515160260144	0.511297080325609	-4.86048463452758	1.17098732951247e-06	0.00057223641534711
ELFN2	8.71772428340465	2.11880495973663	0.437264424010131	4.84559191965624	1.26234749019168e-06	0.000606059673975186
PLXDC1	1820.1500624561	-1.39247742573694	0.288088905731367	-4.83349895825346	1.34153981406955e-06	0.000632975492272886
OCA2	12.0512335595635	2.90453832288841	0.60302548793979	4.81660954798384	1.46018015265116e-06	0.000677276102668674
SLX4IP	701.308504751023	-1.19905673590338	0.249155571999795	-4.81248212223153	1.49067211312551e-06	0.000679895550796545
SAC3D1	1073.53335646761	-0.889348199844018	0.18506003676016	-4.80572799732351	1.54189410361684e-06	0.000691729082616041
FOXF2	735.674786412	2.92446971927303	0.609548473344515	4.79776399607211	1.60446665647857e-06	0.000708190879374074
DCC	23.32664768926	2.36719029718593	0.494331750243183	4.78866731910585	1.67892545849158e-06	0.000726373532255224
TGM3	11.5763355915767	3.15547847295381	0.65927149638026	4.78631108773702	1.69874684149435e-06	0.000726373532255224
MYH1	87.3320447424699	-3.08001503356844	0.644500385655258	-4.77891883716565	1.76240314155869e-06	0.000741998836490695
SPIB	100.177368188099	-1.84777384609325	0.387829797368509	-4.76439370731881	1.89422335996218e-06	0.000774898231529396
GLRA4	81.0142702592115	2.49421769131944	0.523546629187523	4.76407936231037	1.89717830565189e-06	0.000774898231529396
HHATL	1230.95526308912	-3.24615595908518	0.682656170928413	-4.75518437732776	1.98265386297005e-06	0.000797901553147622
LINC01088	106.410103748947	2.2430764935	0.473057917772558	4.74165299687141	2.11981481085956e-06	0.00084073698715917
TRH	3.12333970830881	2.95745186155094	0.626240257604978	4.72255148984122	2.32904098128754e-06	0.000910521935627356
SUV39H1	1061.16364869795	-0.704971841970409	0.150307300736012	-4.69020359302817	2.72933340432471e-06	0.00105198504144718
SYNE4	49.2085118007517	-1.29296166924803	0.276974968700655	-4.66815349890127	3.03918807861595e-06	0.001151947213324
IRX4	7.45166435726353	3.04654551520081	0.652940119745973	4.66588807008225	3.07286949399444e-06	0.001151947213324
CRHR1	18.5795592558893	2.54907996849922	0.548421894264309	4.648027358424	3.35124473827647e-06	0.00123932653388749
RNASEH2A	2618.32091242473	-0.767734466644689	0.165839943852485	-4.62937003480652	3.66779838449575e-06	0.00133830627453481
CDH22	7.59078407503216	2.39676724364023	0.518055456407562	4.62646848710084	3.71953430413791e-06	0.00133932599693471
LRRC55	79.2285675542542	1.99243732468865	0.43121981618012	4.62046791434189	3.82875554945315e-06	0.00136074966709526
TPH1	23.7683369287924	1.72582123794559	0.373845450179076	4.61640294704378	3.90448491360844e-06	0.00136987351468985
BEND4	6.22585361353176	2.19537463259497	0.477406742749446	4.59854131919364	4.25459340446524e-06	0.00147381269755185
BAI1	95.7716831569088	1.97927876915037	0.430764214871854	4.5948077876877	4.33148349384991e-06	0.00148169221615871
GPR87	17.368864354072	3.12973511802699	0.683222993665747	4.58083985322976	4.63112380084205e-06	0.00156463375226967
GDF6	88.7668100365108	2.14688934422787	0.469248451720988	4.57516553619743	4.75843593921161e-06	0.00157044994586139
NDUFB11	6023.88741093601	-0.795108689134615	0.173833051081492	-4.57397879280087	4.78548299198756e-06	0.00157044994586139
TMEM107	757.387979728667	-1.110579235977	0.242884838904208	-4.572451870555	4.82049972419633e-06	0.00157044994586139
CHGA	17.2159375211094	-1.67974980494507	0.36798786907623	-4.56468798594309	5.00237775881122e-06	0.00160158823428088
CTD.2006C1.2	259.195623158175	-0.823718953034443	0.180505450327858	-4.56340211078555	5.03312826676005e-06	0.00160158823428088
KIF22	3348.34790894767	-0.753800420976871	0.165347492155784	-4.55888632569443	5.14255954971849e-06	0.00161760097284593
ZBED2	28.9247834567685	-2.03438041599133	0.44688364562166	-4.55237159811768	5.30445356803997e-06	0.00164956450389752
ATP6AP1L	410.616479738911	-0.785702719142417	0.172775285239018	-4.54754114892921	5.42763105793433e-06	0.00166517011308503
GPR112	17.4394442613934	2.6988757263664	0.593725796100929	4.54566020895546	5.47633231665762e-06	0.00166517011308503
PNMA3	115.787746756711	2.06757376012577	0.455265159138369	4.54147153285098	5.58629299944758e-06	0.00167993949695475
PRNP	7641.77952820087	0.787224090865385	0.173523646758573	4.53669632681629	5.71422942831252e-06	0.00169973481016522
SHC4	79.5633277853529	1.14294862207197	0.252393020082171	4.52844782197171	5.94185493380181e-06	0.00174843873245613
SUCLA2.AS1	11.0174392471009	-1.04878081439571	0.231755417628504	-4.52537776733604	6.02877183411794e-06	0.00175514223417523
CYTL1	167.103274288155	1.72722189466796	0.38225797186815	4.51847187444327	6.22875454097427e-06	0.00179427470282423
NPFFR2	28.4833220773501	2.93328548755452	0.650178951048656	4.51150484466392	6.43693128668015e-06	0.00183492772490926
TNNT2	66.0447644413141	2.82873313167332	0.628391178464509	4.50154812577956	6.74602857275763e-06	0.00189515775545793
KANTR	70.7717443648726	-1.15106506466862	0.255776894735029	-4.50026991633101	6.78672294215002e-06	0.00189515775545793
CNTROB	3809.19614831195	-0.944496726299918	0.211059096587055	-4.47503444093605	7.63989966379988e-06	0.00211185347676311
CILP2	496.280967498135	2.06683239914911	0.462223441027996	4.47150061137623	7.76726378250108e-06	0.00212558940671925
PTTG1	2661.2040291869	-0.975577787360902	0.218443032314716	-4.46605129503679	7.96765139934523e-06	0.00215883909103447
SLC35F3	65.062207066433	2.40529416368702	0.539285092258837	4.46015326255776	8.19010631823047e-06	0.00219735734808524
SPC24	1634.88092440187	-1.03183223694776	0.232023215242233	-4.44710774251843	8.70341902064688e-06	0.00227982374990284
FAM110A	484.491540599036	-0.702340215162716	0.157988544203755	-4.44551355734323	8.76821507674363e-06	0.00227982374990284
FZD10.AS1	173.855187700923	2.32857153424711	0.523902529539453	4.44466556841039	8.80286936448093e-06	0.00227982374990284
ANXA3	221.814140729979	1.80880016559432	0.407021973842324	4.44398652121675	8.83071393297162e-06	0.00227982374990284
HP09025	103.230493862905	3.06096512396371	0.689298857609649	4.4406937428832	8.96693327984256e-06	0.00229335603865581
MYRFL	96.6655981400701	-2.51966959572565	0.568308471337054	-4.43363018995239	9.2659510702118e-06	0.00234788904617978
TOX3	25.9573127922522	3.66296583729482	0.828902318260999	4.41905608972063	9.9132919035608e-06	0.00248216467583906
CNTN3	110.146784509053	2.95652017456268	0.669249470193047	4.41766531949568	9.97727524454786e-06	0.00248216467583906
DLEU7	29.0794591519566	-1.56426867494351	0.354665724787849	-4.41054369118756	1.03111397935398e-05	0.00254211397828837
TACR1	157.732458574595	1.82674491960004	0.414829637239216	4.40360272172798	1.06467836068532e-05	0.00260142750165308
PLAG1	80.5219915450703	1.74015702718372	0.396278292310202	4.39124993962966	1.12700898325009e-05	0.0027128764341134
CDKN2D	1310.68366807795	-0.783978129898948	0.178583018392147	-4.3899926037616	1.13354516282946e-05	0.0027128764341134
NELL1	91.0209606339423	3.76536992768478	0.85795917951234	4.38875183994768	1.14003065820011e-05	0.0027128764341134
CCK	17.4316923044002	3.38621703754659	0.773390651366898	4.37840440864104	1.19551357096174e-05	0.00279641669211612
LINC00162	6.37536255467211	2.57982452562856	0.589217159007478	4.37839340927242	1.19557389818602e-05	0.00279641669211612
BCYRN1	78.8162587022028	1.65585621533228	0.379911226772275	4.35853456977419	1.30936241949832e-05	0.00301398902114123
TRPM6	24.4971790715386	1.33898067216005	0.307329657188551	4.35682219675455	1.3196438150359e-05	0.00301398902114123
ZNF20	35.128586754602	-0.643553896729911	0.147722960546969	-4.35649200602968	1.32163517699681e-05	0.00301398902114123
CFD	478.342211917178	-1.34410003377746	0.309018583999812	-4.34957670305771	1.36400568728612e-05	0.00308490740812164
RALY	12285.9916046199	-0.557085949626174	0.128251743729725	-4.34369103628068	1.40108528812446e-05	0.00314279508154213
DNAJB9	1672.71156174622	0.668872458062639	0.15418429855981	4.33813601196994	1.43696222787095e-05	0.00319706571771678
CXXC4	175.965405239842	2.17867376287954	0.503343331421901	4.32840494126539	1.50193132137854e-05	0.00331466552748752
RP11.575F12.3	58.3536522423573	2.61832027335163	0.606123636258653	4.31977919474222	1.56185396056976e-05	0.00341933563879617
KRT5	107.84120176221	2.93164082562885	0.679077023969412	4.31709617930013	1.5809528216612e-05	0.00343367896171274
QRFPR	26.1246906705813	2.91695473265843	0.67785104011108	4.30323855840131	1.6831944283036e-05	0.00362465926237879
TNNT1	272.908836196472	-2.1213764880371	0.493155120581805	-4.30164140957186	1.69537523052139e-05	0.00362465926237879
COL22A1	1886.0135952236	2.46004796070886	0.572452542900156	4.29738323502901	1.72826247166639e-05	0.00365450282298998
ISG15	4428.09207584073	-1.21365730760447	0.282483223836095	-4.2963872017712	1.73604241390301e-05	0.00365450282298998
CPB1	85.0921186772567	-2.46876274391273	0.575272818979341	-4.29146426263082	1.77498772422657e-05	0.00370118190527032
LAYN	1055.16795875072	1.12678802233755	0.262643399956596	4.29018213487856	1.78526643095696e-05	0.00370118190527032
ABCA7	842.764444236761	-0.936866130776563	0.218841236399931	-4.28103106246597	1.86029386425069e-05	0.00382772946534469
STARD5	303.915788254792	1.14116713133334	0.266701229330809	4.27882216439979	1.87884897945799e-05	0.00383705829640651
ADD2	114.381437271796	1.61621030214754	0.377992103277952	4.27577795443804	1.90470993452019e-05	0.00386070636753485
PPP1R3F	694.003677278425	-0.789162244286593	0.184635893165643	-4.27415401608077	1.91864381343543e-05	0.00386070636753485
RP11.303E16.2	378.067441618274	-0.908285852765774	0.212901019056883	-4.26623534630944	1.98799068721051e-05	0.00397104767490531
FBXO43	222.240449478317	-1.02951543196499	0.241606821197435	-4.26111906469602	2.03405825208332e-05	0.00403362595119653
FAM155A	234.440617830682	1.75816505334262	0.412915912443299	4.25792516190339	2.06332993797999e-05	0.00406223648077413
OOEP	11.2327561696827	3.00767333566334	0.706875215937797	4.25488582404622	2.09155715124059e-05	0.0040659792173857
RP11.540O11.1	20.6875457653919	-1.06917943196633	0.251305824373802	-4.25449523356842	2.09521122569484e-05	0.0040659792173857
CTB.50L17.8	145.325316840481	-0.929395989937616	0.21853014581352	-4.25294179197915	2.10980431509453e-05	0.0040659792173857
DNAH8	4.34730064374351	-1.68479474953742	0.396819752538919	-4.24574315859484	2.17870088582105e-05	0.00414087190551041
RAB40A	90.8187840513373	1.33860902116409	0.315284357346472	4.24571974464647	2.1789284308759e-05	0.00414087190551041
ACTBP12	54.5407589809803	-2.79655789807048	0.65923504736983	-4.2421256412686	2.21412673517677e-05	0.00417874429205845
GSTA1	257.049430429101	-3.00637630294821	0.708982337842961	-4.24041071614695	2.23111168642023e-05	0.00418195906921753
CCDC28B	816.465564021457	-0.923264360805262	0.21809866507066	-4.23324168676658	2.30346726485826e-05	0.00427875558616878
CCDC167	1038.43383921609	-1.01754322180222	0.2404281305658	-4.23221367403072	2.31402406911123e-05	0.00427875558616878
PRAME	53.4294169066589	3.38417130626907	0.800954403305573	4.22517348341235	2.38756775025313e-05	0.00438511268814947
PAX2	6.66945510710826	3.1420432655055	0.744030171450564	4.22300517649675	2.41066280970004e-05	0.00439338798675586
CECR2	39.3413862209782	1.86339026929511	0.441379152912316	4.22174508469658	2.42418178031183e-05	0.00439338798675586
TECRP1	55.0488048848619	-0.947397461983726	0.224561359551441	-4.21888014873148	2.45518734112171e-05	0.00442030636691689
CUX1	6664.26521091099	0.571481249725144	0.135872587542287	4.20600843821631	2.59920532223174e-05	0.00464900999007802
DAND5	88.4569291042173	-1.75482438229857	0.417610112574529	-4.20206390951654	2.64492433866688e-05	0.00470006489947778
ZGLP1	93.4793339284166	-0.769432159308761	0.183339112160129	-4.19677040127006	2.70748161276599e-05	0.00478018979451316
AC104654.2	38.9552224511132	1.54394838966903	0.368436438663086	4.19054205189753	2.78288830278823e-05	0.00487510571606225
ENSG00000196136	13.1642162990871	2.27912904460022	0.544022155862763	4.18940482485635	2.79687055989831e-05	0.00487510571606225
PFAS	1952.36470268306	-1.02361671841764	0.245465282559884	-4.17010791808378	3.04455432434704e-05	0.00527324516709374
RP11.480I12.5	112.208379006875	-1.25304771701119	0.300873051404285	-4.16470571612432	3.11754420904636e-05	0.00536570533489073
OMD	220.323945822502	1.98082532058595	0.475969540705828	4.16166403767882	3.15936927115631e-05	0.00540370621715397
GULP1	744.362561647686	1.10314730628736	0.26578350054046	4.15054848793909	3.31679491730249e-05	0.00563772731098757
MST1R	243.974041387356	-1.78672406392811	0.430785966426258	-4.14759115472244	3.35991710894567e-05	0.00567577108663007
AC016735.2	2.98100034974171	1.85059396714524	0.446450406685913	4.14512774415989	3.39624321514624e-05	0.0057000069607319
BMP7	239.833492332814	2.55334041471553	0.616182763278993	4.14380370059043	3.41592173339192e-05	0.0057000069607319
C10orf25	229.708740048601	0.834861079492208	0.20173028421959	4.13850147845642	3.49581620409858e-05	0.00576596502073748
CYP2U1	1104.14034741762	0.586105212576633	0.141664072309777	4.13728903186545	3.51433315953935e-05	0.00576596502073748
LRRC16B	68.1780039124242	-1.29734367907567	0.313594775365268	-4.13700667546057	3.51865876804487e-05	0.00576596502073748
PQBP1	3999.95906469105	-0.600836238591349	0.145484047033774	-4.12991149780062	3.62902908090006e-05	0.00591142915642328
BMP6	263.992064755543	1.49113596919053	0.361695371005586	4.1226293967901	3.74572073736331e-05	0.00604822568841375
MMP9	6563.40002817347	-2.08308256065234	0.505533280148585	-4.12056464421113	3.77945001913204e-05	0.00604822568841375
SEZ6L	25.2005284571602	1.79991392083633	0.436993774340914	4.11885483620678	3.80759905128299e-05	0.00604822568841375
SEPT7P9	27.0914799312247	-1.43322347681009	0.348010579855251	-4.11833306161616	3.81622872444696e-05	0.00604822568841375
RP11.1069G10.1	191.201903473342	2.07427981823686	0.503723534574539	4.11789339957853	3.82351474126865e-05	0.00604822568841375
MAGEL2	48.0113338860313	2.4725115652424	0.600721930898894	4.11590028275252	3.85671031711754e-05	0.00606567439874935
RP11.505K9.1	62.0481512232747	-0.759399492840074	0.184682020064671	-4.11192975133232	3.9236569738198e-05	0.0061059250218453
CXCL12	7890.69109765967	1.30771523219108	0.318044437896722	4.11173746926437	3.92692685757791e-05	0.0061059250218453
SLC26A7	910.761604697697	-2.28747097911817	0.556949933148215	-4.10713933690235	4.00589593310367e-05	0.00619352249182571
FITM1	21.9192819524134	-1.07373918663692	0.261522186972995	-4.10572884490215	4.03042045561164e-05	0.00619643180832967
RP11.638I8.1	143.076552778135	-1.2076867374429	0.294300905431352	-4.10357805618305	4.06809112583172e-05	0.00621940680164865
RP11.320A16.1	4.43821172675408	2.06880509714409	0.504396379323228	4.10154628770314	4.10398387256251e-05	0.0062394234809192
SNTG2	10.2974890817576	1.89397869677834	0.462344023303447	4.09647059617181	4.19496742512407e-05	0.00634251262740029
RP11.417E7.2	29.0318698027284	1.98512814485214	0.485302223978629	4.09049875885086	4.3044651489698e-05	0.00640702803128702
S100A4	7788.31069405113	-1.76275168417785	0.431008728841642	-4.08982827079939	4.31692692723654e-05	0.00640702803128702
AC004069.2	17.9228733351858	-0.900060956829677	0.220100980380307	-4.08930916743072	4.32659854785641e-05	0.00640702803128702
MATN4	12.4192907413818	1.81960927926117	0.444994747104235	4.08905788462026	4.33128767736644e-05	0.00640702803128702
EN2	18.0629534371979	2.77459458563843	0.681036225216058	4.07407782861799	4.61970317877261e-05	0.00679336097108211
ACYP1	676.944436729901	-0.812424651317334	0.199522550775273	-4.07184374979441	4.66424646954742e-05	0.00679336097108211
KNDC1	44.4685940763503	2.09226192156448	0.513853394171212	4.07170984038953	4.66692926464751e-05	0.00679336097108211
PRKAG3	5.62510505614657	-2.10717007825175	0.518442249478311	-4.06442584564069	4.81508440045354e-05	0.00697193649221225
CCL11	49.0938370742494	2.08624051961134	0.514010049748257	4.05875433881712	4.93351802567173e-05	0.00710582391002802
DNM2	7507.06120497066	-0.30200935079394	0.0744897836011966	-4.05437277695472	5.02689994809643e-05	0.00717824171664758
TRIM72	10.8338466176155	-1.62619966738209	0.401140740227334	-4.05393794322785	5.03625816559357e-05	0.00717824171664758
ALKBH7	2501.9981433032	-0.818812024547982	0.202127180085218	-4.05097436278864	5.10047962832678e-05	0.00723211012998916
SPATA33	386.110627603281	-0.546564648358546	0.134994613025737	-4.04878858576633	5.1483424282134e-05	0.00726234736548906
AC018755.16	22.2651363570057	-0.912405751989804	0.22579998537992	-4.04076975671471	5.3276044243251e-05	0.00747667808595285
FMR1NB	4.52013244490099	2.70309751179322	0.67055632870719	4.03112668700734	5.55101111067642e-05	0.00774569952748374
RP5.1065J22.8	59.9379163885129	0.769677025973308	0.190983303694975	4.03007493892023	5.57590735552984e-05	0.00774569952748374
SLC6A20	13.8823219087557	1.8165980814128	0.450984906773203	4.02806846555146	5.62369685385092e-05	0.00777263071224668
IFITM4P	24.2657919810907	-1.26968053966084	0.315647270760614	-4.02246639611771	5.7591872984422e-05	0.00791989545774719
CENPM	798.122343695461	-0.918364536621349	0.228885452154546	-4.01233249198056	6.01217386583844e-05	0.00819717939762612
TROAP	1155.46228238785	-0.976543005547192	0.243405725776992	-4.01199685188137	6.02073031836165e-05	0.00819717939762612
SPON1	1901.78873947672	2.11961489918769	0.529172345910249	4.00552847398264	6.18789788568056e-05	0.00838306997720466
GNLY	247.003105335914	-1.45522205002602	0.364163007600004	-3.99607324098231	6.44018167588336e-05	0.00865751209205016
CCER2	21.5818265650736	-1.28902223710594	0.322612464416403	-3.99557481276412	6.45374722932921e-05	0.00865751209205016
TECR	5678.24960094076	-0.540186295885423	0.135252067150344	-3.99392266060495	6.49890696363316e-05	0.00867556526667244
RP11.737O24.1	15.6080077104934	-1.79189644648558	0.449063646240676	-3.99029505391138	6.59911504683766e-05	0.00876657195979415
EDAR	8.8697070802359	3.02169649268447	0.760460869631781	3.97350687372987	7.08221133800906e-05	0.00936288867033603
ZBTB20.AS1	4.14712725899502	-1.06592261531087	0.26845799084995	-3.97053785561053	7.17105604724666e-05	0.00942690478247551
AC096558.1	7.81143389840009	-2.0558215848363	0.51790409661384	-3.9695024586167	7.20228637511745e-05	0.00942690478247551
CC2D1A	3288.01267422286	-0.438607738153868	0.110547853303897	-3.96758259021215	7.26053544577045e-05	0.00942690478247551
ELMOD1	18.8282986013428	1.77898758972759	0.448409991438118	3.96732370753404	7.2684239899961e-05	0.00942690478247551
TRIM7	430.741233458855	-1.35878435345508	0.342636219631474	-3.96567635177779	7.3188116329779e-05	0.00944748109189025
DMBX1	29.641901042225	-2.01375215685008	0.509332673343721	-3.9537070018108	7.69496308530319e-05	0.00988640186818812
ADAMTSL4	1520.99417323411	1.24364055659469	0.314700035282331	3.95182846255153	7.75563278398639e-05	0.00991778723208279
POU3F3	16.671395577887	2.60754332597539	0.660181221109368	3.9497387120368	7.82365511044935e-05	0.00995823933732823
MOCOS	461.434716175476	-0.938575747339908	0.237870354794581	-3.94574493383355	7.9552263901706e-05	0.010033211238356
GPLD1	57.2306780350281	1.1492451246442	0.291263348254131	3.94572517116526	7.95588262341319e-05	0.010033211238356
RP11.1299A16.3	31.0098339564473	1.20022702654247	0.304406472889903	3.94284331455911	8.05212644665057e-05	0.0101080042357358
OVCH1.AS1	6.04774327204313	-2.26307349635612	0.574361488213758	-3.94015535998799	8.1428857058038e-05	0.0101752607408688
DPP6	793.817780182961	2.3437713774593	0.595487503960734	3.93588675139327	8.28900569492448e-05	0.0102708592398316
MYLK2	60.7390242025059	-1.28904162014549	0.327522961268803	-3.93572901011832	8.29445257619962e-05	0.0102708592398316
PYCARD	857.786646035058	-1.08847301635389	0.27694106416961	-3.93034171229754	8.48252214857319e-05	0.0104179012573628
LDLRAD4	1575.68081498185	0.952000616758982	0.242230182076881	3.93014862391024	8.48933706201823e-05	0.0104179012573628
BMP3	4.46809275153145	2.30443288306203	0.586618356836624	3.92833407990986	8.55363332358863e-05	0.0104499432827378
SFTPA2	3.53662574537685	2.15312487123066	0.5482766997287	3.92707709865489	8.59844247902822e-05	0.0104579989724927
C17orf59	615.56659964714	-0.807022377162285	0.205631938586694	-3.92459645475766	8.68752461064948e-05	0.0105195928537626
HAUS1	1289.38217888749	-0.46917104848138	0.119713280435914	-3.91912281388482	8.88718234489152e-05	0.0107139485484714
POLA2	1683.46630045624	-0.488559840190719	0.124787878480393	-3.91512257552709	9.03582907056163e-05	0.0108360208660806
AMHR2	11.3500935039425	-2.04601408209078	0.522705792438498	-3.9142747443946	9.06763421154887e-05	0.0108360208660806
AC109642.1	84.5690511064999	1.24136356807759	0.317490001289716	3.90992964513809	9.23230070494758e-05	0.0109848322213737
PROX1.AS1	8.80483208115458	2.206875588809	0.564679770214851	3.90818957082405	9.29903308052669e-05	0.0109975559567391
TRAPPC1	5077.0856742698	-0.868848622886538	0.222401118090169	-3.90667380788202	9.35753404138525e-05	0.0109975559567391
MAB21L2	60.1595159853047	3.98697168828864	1.02059465140356	3.90651830558352	9.36355527998319e-05	0.0109975559567391
ARRB2	2395.66488630094	-0.594525997703658	0.152277806815803	-3.90421959795364	9.45299196906367e-05	0.0110551529156152
LINC01314	28.1576457683275	1.59239808822081	0.408327538190184	3.89980576690649	9.62698882044453e-05	0.0112107308961823
LLNLR.268E12.1	35.1091086128666	-0.990601449314617	0.254082912215686	-3.89873305794652	9.66973034865963e-05	0.0112127898610771
EGFL6	242.40951898875	-1.77152927097342	0.455091101959834	-3.89269151460969	9.91381816472822e-05	0.0114473226960318
MRPL23	1270.3474061576	-0.757979141781833	0.195086004441829	-3.88535889055971	0.00010217882917627	0.0117488480640243
TTC9	317.561885848949	-1.06258904465514	0.274024453649045	-3.87771613264866	0.000105441642986706	0.0120728889315283
SDK2	171.430841304062	1.61157723425977	0.41578548125542	3.87598246430777	0.000106195332360947	0.0120728889315283
PSME2	6395.70095324133	-0.605026155806597	0.156107754420197	-3.87569572090596	0.000106320479152902	0.0120728889315283
RAB6C.AS1	7.48170513760928	2.19386005521804	0.566295725196765	3.87405371011014	0.000107039805636752	0.0120893000958358
RP11.259K5.1	5.60762749836637	-1.37171481235771	0.354141516733043	-3.87335217009231	0.000107348531874885	0.0120893000958358
TMEM130	58.2036723010175	1.66031361112632	0.42901681635329	3.87004319606687	0.000108816071117558	0.0122043467303406
XDH	37.1337536760112	2.53102001181426	0.65429490322245	3.86831686957793	0.000109589195242256	0.0122408894571412
SYT3	13.8200423425942	1.9739806623874	0.510587838849515	3.86609416087011	0.000110592254052236	0.0122596275846821
PPL	1881.13036488333	1.79860563043015	0.465241616548762	3.86596032352501	0.000110652927479956	0.0122596275846821
TINCR	52.416719947368	1.24441151247581	0.322137733052103	3.86297966613721	0.000112012334772043	0.0123478664197238
APEX2	1981.82571684696	-0.468682366089998	0.121349858683272	-3.8622407242622	0.000112351777333597	0.0123478664197238
CXXC1	3419.8579370601	-0.377557155452391	0.0978534237600847	-3.85839494362587	0.000114134108608953	0.0124881064648236
FAM64A	830.024368157195	-1.00312269801053	0.260045341902813	-3.85749150771339	0.00011455665811215	0.0124881064648236
CDC25C	408.200432549068	-0.921495127827182	0.238942637509315	-3.85655376299787	0.000114996814628939	0.0124881064648236
PTPRZ1	44.4111568140617	2.52621908679667	0.655652124432153	3.85298696162172	0.000116685606190703	0.0125662744013349
PAPL	6.35016539708988	1.98744733686431	0.515926608064287	3.85219003206879	0.000117066115831516	0.0125662744013349
LINC00640	41.1948111027175	-1.5780167860947	0.409647714996896	-3.85213130288462	0.000117094203476591	0.0125662744013349
USP53	1410.69300269148	0.986890550054686	0.256304572139773	3.8504601842081	0.00011789609603441	0.0126029084534284
PIGR	18.9579679737823	2.04252899532968	0.530889142667973	3.84737383225618	0.000119390725215082	0.0127130217363266
ZNF700	980.91895939616	-0.709806369836144	0.184561564985966	-3.84590567321054	0.000120107965576706	0.0127152333395052
ADAMDEC1	209.897665986761	-1.95835414874968	0.509357071909961	-3.84475696274589	0.000120671976415437	0.0127152333395052
MOV10L1	30.38838568188	1.57898701336587	0.410714730610029	3.84448595505844	0.000120805403357135	0.0127152333395052
SKA1	706.141230551825	-0.867123700012063	0.225999535749061	-3.83683841268981	0.000124628416018341	0.0130554947527468
ENSG00000252835	4.37201751824621	-1.483905070153	0.386824259842342	-3.83612204352899	0.000124992312549136	0.0130554947527468
KNG1	2.48021854279077	2.54903404101314	0.664778888066744	3.83440883392979	0.000125866643493593	0.0130968310488429
GPR150	30.0910003372178	-1.58290650628556	0.41334398701704	-3.82951380933069	0.000128396678411562	0.0132724150251727
LAMTOR3	1880.92788418921	0.392194294524245	0.102442809760921	3.82842188182402	0.0001289675515394	0.0132724150251727
KIF20A	2501.68701875762	-0.944949185385236	0.246829836303609	-3.82834263286921	0.000129009076836071	0.0132724150251727
SLC6A11	33.4733873193304	2.71763105251823	0.710815687893658	3.82325699728339	0.000131700382690132	0.0134606763724608
MGAM	14.6470853986284	1.39820588291335	0.365750343743124	3.82284229347258	0.000131922160114259	0.0134606763724608
CCDC34	824.62048483737	-0.738581989806783	0.193264257020497	-3.82161710185474	0.000132579431749024	0.0134606763724608
H2AFY	10103.1638724793	-0.398906520644918	0.104393129153052	-3.82119516754858	0.000132806497864664	0.0134606763724608
COMMD4	3703.98059965697	-0.532874449865389	0.139516476489291	-3.81943741179767	0.000133756391991308	0.0135069277610116
LINC01140	124.699302634525	1.36178601167918	0.356985077470062	3.81468609648923	0.000136356148941117	0.0137188322497155
CCR10	272.443834044841	-1.03382614164628	0.27136725198903	-3.80969381555321	0.000139138996640714	0.0138600584070536
RP11.71E19.1	6.54392226757364	1.91566310251408	0.502842856209386	3.80966554234269	0.000139154908250695	0.0138600584070536
RP11.387H17.6	2.04317246982376	-1.99046980733295	0.522509175198726	-3.80944469841303	0.000139279253889489	0.0138600584070536
RP11.386I14.4	9.71588731838298	-1.1784993685039	0.30946536800009	-3.8081785245306	0.000139994192603194	0.013880728531808
GSTA2	14.8569827629129	-2.38268921825177	0.625830994285337	-3.80724067681031	0.000140525970444315	0.013883154177542
TPGS1	262.808119884793	-0.863039195144838	0.22676083338747	-3.8059447138746	0.000141263938230709	0.0139058594734589
FDX1L	180.402342929563	-0.693207227507442	0.182256397416305	-3.80347267549703	0.000142681738119876	0.0139950840336506
IQUB	17.6434367393638	0.970035644747644	0.255124638610943	3.8022029155205	0.000143415188793911	0.0140167859161935
DMBT1	23.3549935163331	1.74526487939745	0.4597725084286	3.79593135170777	0.000147090199821619	0.0143248057235531
PCDH9	449.66216944519	1.83874832850001	0.484546627871161	3.79478098233494	0.000147773844845345	0.0143403511987153
DDX39A	4995.96421269168	-0.57716274515466	0.152175091696807	-3.79275437733658	0.000148985505175052	0.0144068457053727
FLJ37505	3.17507764760858	-2.82383700292771	0.745453275434348	-3.78808048201594	0.000151815675195158	0.0146288301668687
CPT1B	68.293106417921	-0.925085337594314	0.244528281333973	-3.78314251647173	0.000154860683631674	0.0148698858535592
RP5.1092A3.4	30.4206355439806	-0.873853165318284	0.231361551158466	-3.7770025353943	0.000158727116375113	0.0151472147091256
CHAF1A	2529.39020062295	-0.604699856528012	0.160109029902911	-3.77680045213377	0.000158855902269935	0.0151472147091256
CHRNG	14.9518855921389	-2.73333867975698	0.725787435798546	-3.76603196051422	0.000165862569408273	0.015726252223713
HAUS8	726.723201037569	-0.56515646805349	0.150079741622981	-3.76570789596129	0.00016607786642743	0.015726252223713
GLIPR1L2	88.933658938445	1.17348190399626	0.311748392455889	3.76419552560259	0.000167086112927698	0.0157671674702737
TNNC1	50.0125704855612	-1.48097100313045	0.393806689667355	-3.76065476282643	0.000169469187504867	0.0159177700062998
CTC.246B18.10	14.9112192471249	-0.920296002312601	0.244753059633192	-3.76010009309724	0.000169845386312927	0.0159177700062998
LRRC45	1336.99298969148	-0.630708683401896	0.167853224653405	-3.75750114246675	0.000171618583679951	0.0159844164737158
AC090616.2	11.3093939482439	-1.0735909243994	0.285731154774058	-3.75734639524466	0.000171724711074781	0.0159844164737158
SFRP5	27.4273676858687	3.60062678052163	0.958937781316668	3.75480750750877	0.000173474747322082	0.01609257605158
FAM135B	15.8277801023087	2.25192989349695	0.600063722063432	3.75281792699159	0.000174857857822474	0.0161605509818668
COL26A1	21.0095213554114	1.87559905799037	0.499885354170966	3.75205843167972	0.000175388571278756	0.0161605509818668
MTA3	1863.79151979885	0.447083502805874	0.119276165714249	3.74830545674108	0.000178033351919146	0.0163491970087897
KIF1A	1175.79297586007	2.39948610068406	0.640663836134378	3.74531222983027	0.000180169560527703	0.016451692486605
PTPRN2	838.060559238933	1.33295058703062	0.355922509784677	3.74505840565413	0.000180351814148267	0.016451692486605
RTTN	1017.45259490515	-0.722473621909582	0.19296813218948	-3.74400484531906	0.00018111015767473	0.0164659819765005
RP5.1172A22.1	72.3163384882051	1.88827447454953	0.504729008723728	3.74116494576817	0.00018316925177553	0.0165469095113944
DDX12P	172.043929912656	-0.725064950877183	0.193819239474754	-3.74093383526886	0.000183337785290563	0.0165469095113944
PCK1	20.6033316642879	2.57554328814049	0.688596099908931	3.74028155036183	0.000183814239986257	0.0165469095113944
GATA2	524.942700764463	1.04708630786008	0.280021509345489	3.73930670650088	0.000184528474739657	0.0165567417695917
RP11.247A12.2	17.423237725546	0.791147875524618	0.211725182115207	3.73667349164979	0.000186470804500807	0.0166552368659142
OSTN	954.127088670638	-3.09504808461438	0.828490945123588	-3.73576573507715	0.000187144832817212	0.0166552368659142
MYOZ1	68.4499745045399	-1.60041404619625	0.428450549954275	-3.73535299783615	0.000187452055642095	0.0166552368659142
ZFYVE19	1841.5324167061	-0.412267889951967	0.110393678126504	-3.73452444875996	0.000188070221458907	0.0166560831082344
TNFRSF13C	127.098482614513	-1.1194383956149	0.300025426534597	-3.73114508508437	0.000190611404692038	0.0168266829058139
LINC00592	7.45557473477841	2.00198691995546	0.53674941532569	3.72983530637046	0.00019160496998567	0.0168600051724368
RP11.127B20.3	33.8754086043501	-0.633182806434023	0.169986322946399	-3.72490442442055	0.000195389235430033	0.0171081378948378
MYLPF	39.9943581163302	-1.69398941281123	0.454864009339833	-3.72416673561358	0.000195961386828901	0.0171081378948378
APOC1	1899.81744879041	-1.59063589280298	0.427161907795052	-3.7237306599121	0.000196300347108787	0.0171081378948378
CCDC155	2.05831462446181	2.21893999504453	0.596282187284212	3.72129176816561	0.000198206269292521	0.0171718297405097
SLC8A1	3964.2562522501	1.03383467772371	0.277823669693077	3.72119005866501	0.000198286128699886	0.0171718297405097
SOX8	88.0363961504072	1.75429116097344	0.471798460882753	3.71830623968357	0.000200563041928813	0.0173082576671397
ARHGAP36	12.7004369236656	2.49737680375938	0.671896900454926	3.71690478415433	0.000201678406102432	0.0173082576671397
UQCC2	2197.9047834707	-0.628123465852339	0.168995588554615	-3.71680391911146	0.000201758905058013	0.0173082576671397
MYBPC2	66.2158396087828	-2.40554564906176	0.648078458983054	-3.71181238277302	0.00020578049943908	0.0175980910864058
RP11.104O19.4	12.1669156509026	-0.946021781126865	0.254970928861179	-3.71031232992814	0.00020700370332789	0.0176475493622151
SMIM24	21.0467048830583	1.74355405116265	0.470096578224271	3.70892733946013	0.000208139141401747	0.0176691529088745
LINC00634	18.2894537320033	-1.0401233212693	0.280475394782954	-3.7084298324072	0.000208548431980065	0.0176691529088745
DAPK2	362.492618422344	-0.883498542965215	0.238434924529107	-3.70540743857078	0.000211051194348622	0.0178260092115567
IL11	197.902458780822	2.21619483155644	0.598830805481335	3.70086978036322	0.000214861723706565	0.0180180901310068
NRM	2231.47660041598	-0.543019732606734	0.146732862225826	-3.70073700171549	0.000214974192355312	0.0180180901310068
TIMM17B	2494.10335156669	-0.503225638181338	0.136003076842865	-3.70010480544315	0.000215510445647406	0.0180180901310068
SAYSD1	1031.80445237894	-0.521199954368331	0.140885642887459	-3.69945399464637	0.000216063800405283	0.0180180901310068
CDT1	2150.10377766353	-0.883438236454222	0.238844265710137	-3.69880446502479	0.000216617395786788	0.0180180901310068
PGP	1280.50402331051	-0.633214880850177	0.171239176023401	-3.69783886815506	0.000217442838010982	0.0180319415303289
PRKG1.AS1	3.28339566325584	1.6152076857269	0.436971230021104	3.69637077857252	0.000218703497487895	0.0180816915778059
SNX22	322.710504749377	-1.03896960458571	0.281183202285553	-3.6949917212003	0.000219893952004781	0.0181253550920567
FCGR1A	271.484210244178	-1.25590560489693	0.340010087734565	-3.693730422132	0.000220988077158161	0.0181608399985292
RP11.622C24.1	1.95906740337615	1.86183437202367	0.505028616015494	3.68659183456358	0.00022727744823032	0.0186217803840447
KCNJ4	145.463550729712	-2.61765884372213	0.710504147155724	-3.68422739571766	0.0002293973835124	0.0187268762237143
RP11.103J8.1	6.19936077689344	-1.4903153124168	0.404577033092947	-3.68363794905386	0.000229928758721333	0.0187268762237143
IL12B	6.35242148976155	-1.41629220967444	0.384918971740353	-3.67945545336695	0.00023373251146165	0.0189801896399392
FOXE1	36.4157305719758	2.36914220224229	0.64401878296406	3.67868494663843	0.000234439655131323	0.0189812887642715
NR1H4	173.323882689565	-2.33469459075407	0.634867850122076	-3.67744970910898	0.000235577502690565	0.0189824252762128
EBP	1931.75450487872	-0.773933287434924	0.210488734004773	-3.67683948071717	0.000236141529189634	0.0189824252762128
DNAJB14	1892.79062196931	0.410632325354478	0.1116936820849	3.67641497432551	0.000236534642227164	0.0189824252762128
ASIP	18.4009687413281	-1.47276074383889	0.400759994489731	-3.67491956305192	0.000237924361028362	0.019038122993866
CDK16	9475.30143916539	-0.572260141080306	0.155782740604799	-3.6734502093018	0.000239297323015253	0.0190921590135143
PBX4	133.147625850266	-1.04691993378427	0.28519554576941	-3.67088458888743	0.000241712471992111	0.0192287892690003
C19orf60	1670.95869361389	-0.752152944839513	0.204988464175565	-3.66924523223572	0.000243267635948253	0.0192964119575649
DKK2	154.323941300535	1.40215765139238	0.38223872726489	3.66827731304339	0.000244190247580999	0.0193136136280394
LMX1B	32.0430074307193	2.04951249585414	0.559065508917473	3.66596125706742	0.000246411231960336	0.0193821377994661
AC004854.5	4.36013510690811	-1.41017282092695	0.384673336082974	-3.66589697972406	0.000246473140181765	0.0193821377994661
CPED1	2804.66669715166	1.20809941375682	0.329723041777327	3.66398237516167	0.000248323880094514	0.0194717229302764
CDH20	15.0407637979572	-1.60414468090348	0.438891044436459	-3.65499524594587	0.000257186743697659	0.0200832692362564
PADI1	9.0884954585948	2.66642835035331	0.729903793338909	3.65312302071464	0.000259070031992746	0.0200832692362564
RP11.849F2.7	8.33337020157665	-1.32085831559847	0.361611748462175	-3.65269746133989	0.000259499905881799	0.0200832692362564
DGKK	8.23037965055601	2.40871529381271	0.659502594095723	3.65232118171638	0.00025988055742572	0.0200832692362564
PTGS2	426.465582330587	1.4374569181647	0.393626810035778	3.65182675954933	0.000260381520127071	0.0200832692362564
CTB.129P6.7	21.2569437367137	-1.33727684333066	0.366259450422492	-3.6511736196515	0.000261044688340254	0.0200832692362564
THOP1	2611.57343823425	-0.491046684011345	0.134497896899722	-3.65096180185966	0.000261260098227994	0.0200832692362564
FZD7	3879.60544465358	1.00373275579044	0.275068267786661	3.64903143451256	0.000263230896161776	0.0201780860066195
DUOX2	769.251053160095	-2.02949384519621	0.556719166576419	-3.64545351954867	0.000266920657816103	0.0203587353407308
RP4.735C1.4	7.50756653062056	1.66885581914792	0.457809721074338	3.64530446236841	0.000267075421593304	0.0203587353407308
SLC6A1	74.6338979497068	1.22961686044822	0.337483731743438	3.64348484027965	0.000268971500972053	0.0204463169322256
DNER	56.5486741086683	1.59195241030039	0.437247060084586	3.64085331984261	0.000271735922645973	0.0205992389449576
LIX1	19.2055348994989	2.01183412987915	0.552747040120484	3.63970131697245	0.000272954467226829	0.0206053822508651
ADAMTS10	1902.99042163098	-0.886462486017367	0.243576879728096	-3.63935397730245	0.000273322873531537	0.0206053822508651
PPP2R3B	1043.51064327886	-0.627096952239752	0.172363417093491	-3.63822534279192	0.000274523181285146	0.020639014777608
NCAPD2	6192.63154140274	-0.502677881696441	0.138347615076782	-3.63344089030706	0.000279666538137263	0.020958870516958
ATP8B5P	16.0395193539938	-0.995404557852943	0.274030700360672	-3.63245635084981	0.000280736074529061	0.020958870516958
FNDC1	3633.2190559481	1.74038016920518	0.479160451316445	3.63214485758091	0.000281075256878009	0.020958870516958
ATP8A2	193.21735642825	1.56781998190977	0.431928963482605	3.6298097938804	0.00028363014311211	0.021091908957625
TRIM63	863.050932142822	-2.14858545407616	0.593042062700631	-3.62298998538452	0.000291217101602329	0.0215974178928166
MYF6	16.5777002679923	-4.25238599552809	1.17527041868092	-3.61821920124631	0.000296637109540359	0.0218848078415021
AMOTL2	2384.21939149929	0.764285269972409	0.211266251006925	3.61764014048489	0.000297301363109381	0.0218848078415021
FEZ2	2341.46365133598	0.463100482608822	0.128036801687321	3.6169326045785	0.000298114884488946	0.0218848078415021
HEATR9	5.38346176959015	-1.22276631390367	0.338122676889493	-3.61633926819792	0.000298798706622922	0.0218848078415021
TCF23	2277.08675634351	2.32673461692285	0.643440024792268	3.61608623534731	0.000299090774417956	0.0218848078415021
RP11.337N6.1	4.07019041992687	-2.03402154541128	0.562807628924394	-3.61406178750381	0.000301437176032399	0.0219976793581404
ACVR2A	747.8271408665	0.578492826055859	0.160132126561783	3.61259691279165	0.000303145751948714	0.0220383230315863
ALDH1A1	3095.85819758322	1.5545877211953	0.430370882175632	3.61220469502135	0.000303604757103999	0.0220383230315863
TLR7	311.623708463801	-1.12670601038619	0.312022646705528	-3.61097510800079	0.000305047941753795	0.0220585788247797
CYP26A1	13.4695218627368	1.63770229939125	0.453582445085736	3.61059453939335	0.000305495921018472	0.0220585788247797
PACSIN1	52.1375374867581	-1.42079979597876	0.393662204551752	-3.60918518351684	0.000307160288717559	0.0220908555081576
RP11.1099M24.6	49.4555052015055	-0.950424887564534	0.263378617241788	-3.60858788582682	0.000307868221201427	0.0220908555081576
MAP6	561.259743719878	1.32922966127694	0.368470083207606	3.60742899316475	0.000309246130151773	0.0220908555081576
FAM86EP	160.540717243411	0.545235113770924	0.151165024891213	3.60688667344386	0.000309892922938125	0.0220908555081576
ATP2A1.AS1	136.566971191876	-0.965216942838284	0.267609256776606	-3.60681448192215	0.000309979116974805	0.0220908555081576
AKR1B10	82.0437354418226	1.60527863685107	0.44590700227904	3.60003011535243	0.00031818032702828	0.0226156920998997
KRT42P	11.9673421525316	1.89611943807149	0.526792916588411	3.59936395946824	0.00031899646095744	0.0226156920998997
LBP	198.11634694322	-2.00596687654119	0.557574540940655	-3.59766583523886	0.000321085773064064	0.0227049955185302
RP11.635N19.1	158.37983756359	-0.775705071818661	0.21570976724972	-3.5960591015828	0.000323074428470571	0.0227867391998084
GS1.124K5.9	2.69373824900559	1.23839073086265	0.344577741908954	3.59393710110814	0.000325718499412869	0.0229095924622837
USH1C	18.2803832111636	2.49171253988734	0.693428969400814	3.5933205127562	0.000326490574446051	0.0229095924622837
AC092162.1	15.2665360330629	1.79226397793582	0.498875181212383	3.59261002638014	0.000327382349781595	0.0229134153046628
MSANTD4	1014.48020575812	0.530165701333191	0.147964749516685	3.5830540927142	0.000339600247988017	0.0236519817307703
CCDC3	3000.11703961797	1.42534533951805	0.397807183290642	3.58300553481127	0.000339663407885432	0.0236519817307703
LRP5	3894.53790093546	0.756435315207592	0.21131276876242	3.57969525286026	0.000343995139493338	0.023858888870667
LBX1	6.35789335037001	3.44414001625492	0.962210419859656	3.57940419805189	0.000344378466122688	0.023858888870667
SIGLEC10	195.884577832346	-1.10474838079126	0.308858935850974	-3.57687038501067	0.000347732484505694	0.0240096327507918
POC1A	834.607466448587	-0.617320862275561	0.172607775754793	-3.57643715398157	0.000348309003948855	0.0240096327507918
CCDC181	94.1119031376029	1.17517016189177	0.328681520282654	3.57540685853336	0.000349683656424655	0.0240438264867264
TPGS2	4173.13063446688	-0.443924169345898	0.124254388980655	-3.57270413534455	0.000353313868303632	0.0241964105973188
E2F2	546.125859395934	-0.844964851772957	0.236523204668815	-3.57243955389533	0.00035367113348416	0.0241964105973188
TMEM26.AS1	6.92506050894425	-1.53355477877264	0.429503280716553	-3.57053100086724	0.00035625828519565	0.0242836324243087
APOC1P1	7.78076208580845	-1.68510270350288	0.471992285357396	-3.57019119968647	0.000356720756945557	0.0242836324243087
LSM4	4758.93601944443	-0.536289358044371	0.150282002776041	-3.56855344045142	0.00035895764322784	0.0243752726168067
GPR143	156.501526635691	-1.90458849541015	0.534396009800125	-3.56400208924185	0.000365243044277347	0.0247406959150839
TMEM238	29.4699570107705	-0.870181831265323	0.24428128266034	-3.56221246993886	0.000367742571646106	0.0248485017670798
KIRREL2	75.8298074455606	-1.72604730679678	0.484769494754801	-3.56055264506653	0.00037007510395503	0.0249337332571919
REC8	734.613972035861	-0.99638136081563	0.279880812129589	-3.56002025731686	0.000370826187081675	0.0249337332571919
SHISA6	53.1876544938804	1.7699026154616	0.497256493432597	3.55933535074391	0.000371794537049855	0.0249375718159469
CKLF	466.510638036715	-0.681746245434921	0.191608280803043	-3.55802078374524	0.000373659753873916	0.024958833191232
PIK3CD.AS1	3.07673212415216	-1.48270319339063	0.416764116055731	-3.55765560486104	0.000374179450385652	0.024958833191232
TMEM72.AS1	6.82064066197399	1.1028677674957	0.310039319080771	3.55718678123011	0.000374847637272395	0.024958833191232
AOX1	1384.87148466582	1.62768641217501	0.457752276040072	3.55582374435321	0.00037679663488186	0.025012638270493
SLC1A6	4.95054906868396	2.18074478097118	0.613370827706766	3.55534479708534	0.000377483724538246	0.025012638270493
PROCR	1510.9554271794	0.930122490800968	0.261786985102009	3.55297453171146	0.000380901340122191	0.0251781306130045
PET100	1165.96000009205	-0.673052107700229	0.18960764981399	-3.54970966815163	0.000385656221274595	0.0254310075937363
DTNBP1	1146.37585472604	-0.429435374716588	0.121046935219839	-3.54767655981269	0.000388645165842719	0.0255664990587785
LPIN1	2259.42523729969	0.50732869901888	0.143097917747766	3.54532551558949	0.000392128505019636	0.0256955262640945
CORO7	709.808873215987	-0.761203867604854	0.21472082482254	-3.54508636148341	0.000392484468990408	0.0256955262640945
PSMB8	4350.60983471936	-0.594153693784194	0.167877620682801	-3.53920725923813	0.000401330621442426	0.0262119660773113
RP11.861L17.4	4.37640719043117	-1.47862414813367	0.417898799951048	-3.53823497054041	0.00040281143007395	0.0262460418938184
LINC00941	29.2637405746006	1.64215009813443	0.464465556313649	3.5355691629058	0.000406897715234855	0.0264440566659424
SPSB4	245.834696818002	-1.07790001964762	0.304946177076739	-3.53472219255389	0.00040820407857431	0.0264440566659424
MYOT	40.3881170514957	-1.17705452004968	0.333037464479074	-3.53430062858179	0.000408855756261003	0.0264440566659424
TNFRSF18	83.4565568208448	-1.26315389860278	0.35749442402152	-3.53335272867568	0.000410324624931463	0.0264440566659424
FGD5P1	5.16245314088443	2.09766799571859	0.593782184089745	3.53272302862079	0.000411303133352368	0.0264440566659424
CD72	325.541726702372	-0.889892808140648	0.251915782303857	-3.53250121926571	0.000411648327840805	0.0264440566659424
IGF2	12377.7593938826	1.63318508975112	0.462435145807459	3.53170623936771	0.000412887752640787	0.0264615602781447
TMEM178A	114.332226580251	1.01686329130448	0.288028729068633	3.53042314422106	0.000414895535436708	0.0265002096112076
IGF2.AS	34.3439531524029	2.20673908033862	0.625123650107587	3.53008413608865	0.000415427535014546	0.0265002096112076
SLC18A2	41.6716653119021	1.45507181248418	0.412641573151147	3.52623658680945	0.000421510240719887	0.0267688361795797
CMC1	776.086466033198	-0.343195286628027	0.0973276919129489	-3.52618334908204	0.000421594986238357	0.0267688361795797
HAND1	24.3761892143445	1.97312290488615	0.559780602364299	3.52481471589483	0.000423779090231348	0.0268452282020164
EDN1	263.500155575808	0.97505445827331	0.27672132887586	3.52359705062969	0.000425731152497642	0.0269066021229803
IGHV3.53	36.6487882144901	-2.60183005523931	0.738947135007249	-3.52099620118803	0.000429928775783684	0.0271022517227838
NXPH4	632.987935947075	-1.34387037412583	0.381732044213259	-3.52045471292702	0.000430807553146641	0.0271022517227838
RP11.849F2.5	44.8981808985324	-0.796702161473237	0.226460188072614	-3.51806720754721	0.000434702253806559	0.0271536971729661
SNED1	739.290837807749	1.17125090168876	0.332972815697017	3.51755712921178	0.000435538587038494	0.0271536971729661
SLC3A1	21.8381388945904	1.36427165615702	0.387848126674134	3.51754091957562	0.000435565189247219	0.0271536971729661
NALCN	100.080963154477	1.63878590582217	0.465964045182199	3.51697930938294	0.000436487804885518	0.0271536971729661
TMPO.AS1	470.816976300587	-0.787499588110707	0.223917447174715	-3.51691928452653	0.000436586521819231	0.0271536971729661
PIWIL3	4.03982566093064	2.26566093273305	0.644445635839174	3.51567425820611	0.000438638798676206	0.0272194770171725
PRKG2	49.151703574626	1.86930655310947	0.531883886767011	3.51450119023498	0.00044058069743751	0.0272400775399823
SSPN	2624.33936805024	0.854035734490967	0.243019269114849	3.51427167731031	0.000440961570935181	0.0272400775399823
FCGR1B	56.2890533137097	-1.2037746037998	0.342660499385632	-3.5130241330941	0.000443037234417516	0.0273066598132201
RP5.1099D15.1	6.96729900727687	-1.13455324334018	0.323209075558927	-3.51027656441328	0.000447640839956454	0.0275284027556142
RP11.490B18.5	8.89878852934104	-1.03207180639067	0.294410933858177	-3.50554849599382	0.00045566748026561	0.0279591844505576
PQLC1	3051.99244242449	-0.460417685212556	0.131406942907421	-3.50375463446351	0.000458747834858916	0.0280525325459652
IL31RA	157.380049268392	2.14112797895622	0.611145007549434	3.50346963896784	0.000459239003895068	0.0280525325459652
DLG2	262.837287546217	0.992018489959608	0.283244255947939	3.50234283353637	0.000461185780632669	0.0281087084026584
RAD51AP1	576.44810309078	-0.670224733887048	0.191439293967631	-3.50097788179459	0.0004635543147416	0.0281902830604859
CAPZA2	6693.38709800356	0.360145893930531	0.10296288487699	3.49782248584816	0.000469073232344555	0.0284626564885612
MAFA	17.2645517201589	1.95234574335689	0.558431662197388	3.49612293771909	0.000472071152040887	0.0285742844318051
SLC1A7	120.93951808118	1.44884269358676	0.414476380044645	3.49559773087841	0.000473001200307232	0.0285742844318051
SYCE2	90.0684929816078	-0.666779695406127	0.190786537828329	-3.49489907933704	0.00047424103775004	0.0285860798217348
CTC.232P5.1	25.574508567964	-0.6901920416233	0.197539722915558	-3.49394051705912	0.00047594705020254	0.0286258614853686
CEBPZ	2175.04678191748	0.360034656638723	0.103071855116716	3.49304527633687	0.000477545533686734	0.0286521819091997
FHIT	423.790761097349	-0.942733607904039	0.26997353237003	-3.49194826480958	0.000479511113615317	0.0286521819091997
RNF216	5783.16046716972	0.488972516385615	0.1400288933944	3.49194015986681	0.00047952566375844	0.0286521819091997
CCND2	1935.50853763364	1.33614949057247	0.382879195816426	3.4897416866	0.000483487644760409	0.0288259757876108
RPL10P15	19.8693544213266	-0.822107968122568	0.235775898922071	-3.48681935635114	0.000488801399701311	0.0290794328352741
KCTD18	819.210374171135	0.406569336178949	0.116648961695979	3.48540895922063	0.000491385403892167	0.0291697461234556
FHL2	6637.14255733536	0.714623069330505	0.205121653771657	3.4838987312672	0.000494166428368974	0.029271338698583
FEZF1	30.4301041411589	2.23236124689318	0.640997598175051	3.48263589949294	0.000496503142464996	0.0293462310943782
CCDC27	4.50947105565812	1.51780119153836	0.436193765823544	3.47964897818454	0.000502071136846111	0.0296113765752816
SPPL2B	3014.71367186996	-0.377745457014129	0.108601372565375	-3.47827516440215	0.00050465159485965	0.0296995603116756
CD37	831.133206908751	-0.967765394003823	0.27859383135254	-3.47375025967172	0.000513238494264973	0.0300452966603753
PDE11A	116.377265050887	1.71100774715293	0.492563760548075	3.47367769250644	0.000513377307873234	0.0300452966603753
ENDOU	32.4361142213469	1.4661558137331	0.422104058899896	3.47344637612405	0.000513820026202428	0.0300452966603753
AZU1	8.00317624272788	-1.17458833548985	0.338379526354838	-3.47121573265085	0.000518107573482943	0.0302047195728166
KRT80	173.373662320567	1.63139382576485	0.470085962756893	3.47041595583345	0.000519652938809848	0.0302047195728166
MCFD2	5014.06479873759	0.428749112201874	0.123547777203347	3.47031020636005	0.000519857594050889	0.0302047195728166
HOMER3	2736.07354401588	-0.788555150339669	0.227337907743008	-3.46864787385605	0.000523084567002986	0.0303278225860248
CD14	6550.74875550862	-1.12147043313622	0.323372721411852	-3.46804278431358	0.000524263813421271	0.0303319313278784
XXyac.YM21GA2.7	2.36581963302943	2.03004144840019	0.585694087310358	3.46604395090038	0.000528176931901818	0.0304558620697474
BMPR2	4949.94841287903	0.44054980674917	0.127112992687422	3.46581256121085	0.000528631677378134	0.0304558620697474
PARD3B	1098.17187646176	0.629516688968106	0.181710919946589	3.46438556996543	0.000531444187303595	0.0305535748524163
CTD.2006C1.13	9.47386047623005	-0.832010928403904	0.240247544839385	-3.46314019133946	0.000533910138444077	0.0306309954898546
CCHCR1	2880.99808783774	-0.636269523399322	0.183778316151002	-3.46215776009466	0.000535862950641619	0.0306787144503317
LHFP	4065.95078756846	0.822354631790767	0.237650845209398	3.46034802050115	0.000539477664156216	0.0308211811217098
RP11.554A11.4	318.498110113797	1.14652952709319	0.3314464696209	3.45916952563883	0.000541843750506292	0.03089186682574
CLDN9	48.710534091396	-1.57554283908395	0.4559832191369	-3.45526495923729	0.000549752281846935	0.0312362512670828
CES4A	85.0276876324683	1.30019683778971	0.376427845250498	3.45404000844964	0.000552255440480367	0.0312362512670828
C10orf67	6.44046529883765	2.00181297023636	0.57959165536384	3.45383331818282	0.000552678852643622	0.0312362512670828
LA16c.380H5.5	19.6715623421796	-1.41593737814473	0.409998914212714	-3.45351494616428	0.000553331640391896	0.0312362512670828
WFS1	3821.45438511497	0.629680580336585	0.18233703082658	3.45338836264956	0.000553591385826762	0.0312362512670828
IFI44	1839.38751635299	-0.806070638881423	0.233676119050711	-3.44952082461834	0.000561582414195667	0.0316219431005733
WDR86.AS1	27.1513925720848	1.36110710676778	0.394707938569946	3.44839050285931	0.000563938070221298	0.0316893824017989
RP11.651P23.5	5.82324577865746	-0.974503676973912	0.282733182765019	-3.44672552207579	0.000567424752476898	0.0317758605140163
NDUFB1	2241.52964004386	-0.534058484404123	0.154954639727181	-3.44654723049536	0.000567799305391872	0.0317758605140163
WWC2.AS2	18.0901385804741	1.14812666562733	0.333198992332394	3.44576872093893	0.000569437488541038	0.0318025026763552
TMSB4XP4	81.471847900282	-0.919999205547605	0.267112850631944	-3.44423416309265	0.000572679486573669	0.0319184253148167
COL2A1	141.038328335613	2.00628685576033	0.582757195400864	3.44274917854983	0.00057583310923666	0.0320289611125415
THAP5	1358.11802657292	0.358920297853202	0.104439944239339	3.4366190107368	0.00058902351429533	0.032680912204928
HMGN2P5	42.151888303999	-0.714435567031716	0.207914635061624	-3.43619662377284	0.000589942652533598	0.032680912204928
WSCD1	302.699208406662	-0.981322185225648	0.285630319787804	-3.43563731593577	0.000591161793019052	0.0326822901570896
GP6	7.40447085085761	1.00557229645857	0.292751967120261	3.43489509686366	0.00059278325205907	0.0327000271725599
RP4.717I23.2	4.86553696338741	-0.789954080006743	0.230012414660571	-3.43439757881103	0.00059387245139086	0.0327000271725599
RP11.345K20.2	42.4388566930109	-0.887707329397721	0.258664519658552	-3.43188671785961	0.000599397875229265	0.0329379964930202
LTBP2	4819.72714967239	1.19947260681723	0.349789162315366	3.42913027629999	0.000605518802617265	0.0332076704457396
TK1	2663.94474480042	-0.868378767048466	0.253361354887176	-3.42743180954003	0.00060931931426735	0.0332376439792644
SORD2P	70.5909552035726	-1.18473630597132	0.345686529723838	-3.42719835487309	0.000609843427381003	0.0332376439792644
RIMBP2	82.6852778270124	2.03457377127502	0.593784422454708	3.42645191476072	0.000611522025569778	0.0332376439792644
TMEM26	285.905047888518	-1.26797228770335	0.370083748684862	-3.42617662139784	0.000612142191165107	0.0332376439792644
CTD.2015H6.3	128.657619982177	-0.649866551936727	0.189686472638769	-3.42600367277801	0.000612532099489928	0.0332376439792644
ZNF239	232.349181898319	0.566854518400031	0.165474047394837	3.42564001621028	0.000613352708087719	0.0332376439792644
LRRC20	1069.12405105945	-0.584690765958389	0.170746894154853	-3.42431274578923	0.000616356446430338	0.0333344081284835
KL	104.326418219826	0.86965558657283	0.254113347311324	3.42231368707832	0.000620906347307522	0.0335142467463859
PCNA	7206.82655851542	-0.58108577254474	0.169957010100746	-3.41901621004211	0.000628479822761161	0.033856257538744
LIG1	2592.5201305828	-0.591307142324918	0.173011245382017	-3.41773819972965	0.000631438131465081	0.0339487935278456
SPN	350.416782830465	-1.2183545749051	0.356708183239914	-3.4155498307861	0.00063653381789777	0.0340547605573022
C11orf53	7.26213968901413	-2.14738268841091	0.62883734685044	-3.41484598388785	0.000638180860558194	0.0340547605573022
BARX1	259.923388575631	2.04408600428453	0.598611912747758	3.41470986586574	0.000638499841741803	0.0340547605573022
CENPN	730.59678045711	-0.696774942820092	0.204064166231894	-3.41448945048144	0.000639016681257429	0.0340547605573022
NEB	187.791247986585	-1.09167187008332	0.319741973156637	-3.41422760141825	0.000639631181994203	0.0340547605573022
MIR762HG	81.9401119754574	-0.414418598558557	0.121404035744387	-3.41354878375794	0.000641226774439232	0.0340734211831146
FCRL3	60.7690260482691	-1.73151303578943	0.507369331168195	-3.41272704008873	0.000643163274502346	0.0341100894768046
RNU6.137P	3.06828397442005	1.07751163916993	0.315972473271345	3.41014401670554	0.000649285840371126	0.0343681940185614
RP11.395B7.4	25.8703108182633	1.42277839980951	0.417494250043551	3.40789938941936	0.000654650275905933	0.0345852499043277
RNASEH2B.AS1	27.1359328162265	-1.06074245459719	0.311403713972302	-3.40632563775888	0.000658435933249268	0.0345907349951422
RANGRF	814.630797269598	-0.8374500973568	0.245887311465993	-3.40582884234196	0.000659635194783403	0.0345907349951422
PIN1	4002.85044725955	-0.420726354848374	0.123541612695693	-3.40554365179532	0.000660324560619657	0.0345907349951422
UBE2T	1459.0856579051	-0.616806639305062	0.181120761003464	-3.40549938001456	0.000660431634921218	0.0345907349951422
GADD45GIP1	3639.31233160515	-0.700652506333356	0.205757528714296	-3.40523387266303	0.000661074121262128	0.0345907349951422
EEF1A1P11	150.233317081276	0.705724158709476	0.20745482001351	3.40182097800146	0.000669384709566405	0.0349587442022791
GCDH	1272.18606061974	-0.447951372758946	0.131721869734296	-3.40073651901947	0.000672045696576016	0.0350162921359886
OCLN	56.5863304500877	1.33509397812559	0.392680031540506	3.39995383235543	0.00067397231759721	0.0350162921359886
MRPS25	2367.07740763803	-0.429727225156535	0.126397399100959	-3.39981066234831	0.000674325292540597	0.0350162921359886
MLLT10P1	4.08408732300991	0.913030633064418	0.268655637723274	3.39851655748566	0.000677523617650764	0.0351157411375584
EOMES	101.739828242622	-1.29628874299935	0.381674844998764	-3.39631694355847	0.000682992244875905	0.0352723013287307
PLA2G10	30.8031162875974	-1.56738575518558	0.461538562302296	-3.39600172814809	0.00068377927860104	0.0352723013287307
LRRC36	89.6870204415074	-1.00201837316686	0.295097376966079	-3.39555160899327	0.000684904603148925	0.0352723013287307
TSPAN31	1325.21777150404	0.632208852812202	0.186204801039872	3.39523389988654	0.000685699930822361	0.0352723013287307
TRIM58	24.7691477537741	1.70574342282199	0.502492295661322	3.39456631982205	0.000687373895371889	0.0352920713334843
FGF20	1.22392424541479	1.93973231700608	0.571623707052703	3.39337276091531	0.000690376227768465	0.0353798424140671
ELK3	4060.96115656547	0.694657131504502	0.204817674334252	3.39158782933379	0.000694888875808603	0.0355445401408939
APOBEC3B	352.841047000961	-0.824207845270236	0.243196693504691	-3.38905859858797	0.000701330213144525	0.035696419415199
SLC44A3	301.859588594847	0.997040849410915	0.294202287673393	3.38896361852146	0.000701573181892678	0.035696419415199
CYP3A7	13.3739395174183	1.07306655899745	0.31664284332476	3.38888619029003	0.00070177130911997	0.035696419415199
RP11.752D24.2	3.89972954279464	1.3649191306726	0.402863372660295	3.3880447399807	0.000703927809717401	0.0357396817082123
MYBPC1	49.978824656232	-2.55370937128703	0.754808702320578	-3.38325374818271	0.000716324146109657	0.0363017158934016
FGFBP2	36.1756729265776	1.46533834229284	0.433649991447998	3.37908075911621	0.000727286401879059	0.0367891306355311
ZSCAN16.AS1	541.912640730911	-0.562498942250818	0.166542029259475	-3.37751944510316	0.000731427814642356	0.036930357150374
GPR98	107.767316408531	1.74792409631628	0.517697362886177	3.37634344237636	0.000734561634637563	0.0370202830451042
SEC24B	2186.60771259518	0.333732722169626	0.0988807910913553	3.37510166015251	0.00073788427862494	0.0370676910672088
RNASE2	42.1995113698745	-1.42374767072033	0.421853698314517	-3.37497970601847	0.00073821134369761	0.0370676910672088
EMC6	132.392768196827	-0.5520045790145	0.163649868504669	-3.37308293650569	0.000743315596051525	0.0371778280603336
TDRD12	19.8766128919307	1.21875727647234	0.361326344267334	3.37300973429886	0.000743513240303344	0.0371778280603336
LINC01287	5.56044088478868	1.65368813516405	0.490322818748719	3.37265179577851	0.00074448036896378	0.0371778280603336
EGR3	558.288527479039	1.22469152253093	0.363189109465711	3.37204913531846	0.000746111361792448	0.0371914089741569
TNMD	249.56340795565	1.85969711574249	0.551598937929995	3.3714660922326	0.000747692421271238	0.0372024560009249
DHRS4L2	778.347183366223	-0.543355736948469	0.161229454597459	-3.37007737392069	0.000751470799829431	0.0372809157232834
ZNF182	523.860518406485	-0.328510600668301	0.0974841991530419	-3.36988561759191	0.000751993915049785	0.0372809157232834
PRDM8	516.799700186263	1.01384974170865	0.30101999030463	3.36804788506783	0.000757024465365348	0.037417206793822
D4S234E	64.9570355609765	1.37787506185357	0.409122022207575	3.36788289816011	0.000757477620542913	0.037417206793822
IGFBP2	3496.29473599833	1.38066857317816	0.410143014704918	3.36631010081082	0.000761810149206164	0.0375634171949115
CKM	76.2385789532908	-1.76714283797669	0.525111950798343	-3.36526874943534	0.000764691370991024	0.037591416034816
PTCHD2	36.9365292528534	1.47660362863969	0.438798810547397	3.36510399104692	0.000765148152132243	0.037591416034816
NDUFS6	3914.9861760822	-0.582622487310827	0.173172448358096	-3.36440636391561	0.000767085083436296	0.037591416034816
HDAC10	379.877062068674	-0.486442205610279	0.144597025149472	-3.36412319069107	0.000767872599702629	0.037591416034816
SCAND1	2722.97568082945	-0.611537122679647	0.182103934528155	-3.35817633080903	0.000784585461192442	0.0383410102339149
RP11.513M16.7	26.7593443439987	0.636489073959459	0.189592065975051	3.35715036748013	0.000787502721129861	0.0384149723109443
LAMA2	1469.89310913388	1.44617954879379	0.430905761934142	3.35613880469489	0.000790388888269313	0.0384871571465801
CTA.243E7.1	4.24453106775237	-0.933378455667501	0.278349167201729	-3.35326476831544	0.000798642681357693	0.0387839742834903
ENSG00000222881	4.17536344670067	-1.14163092074042	0.340477342400476	-3.35303052089033	0.000799318917484781	0.0387839742834903
LPPR4	343.007328742235	1.61721537984032	0.482397420358272	3.35245445267768	0.000800984198315055	0.0387959886213978
NR5A1	3.61596115315092	2.43700435677797	0.727388338798363	3.35034839959611	0.000807099754236154	0.0390231305201883
PTPN13	1437.82799683861	1.01156102630223	0.302016865161255	3.34935277790573	0.00081000589773043	0.0390945703655925
CEP131	1775.56361858762	-0.559012091178364	0.166969343603988	-3.34799238657971	0.000813992475178922	0.0391487101474808
SNHG9	243.848508103972	-0.812663744849479	0.242760828684199	-3.34759009208463	0.000815174867787946	0.0391487101474808
HDAC6	3490.34676882256	-0.42398869902395	0.126661920043534	-3.34740464125464	0.000815720466862585	0.0391487101474808
ZFR2	8.78409327132364	1.2864510659394	0.384357020755655	3.3470211196096	0.000816849868238381	0.0391487101474808
CSTA	143.926355379136	-1.249629695241	0.373451466626145	-3.34616357656985	0.000819380427063011	0.0392013370052559
SLC2A13	758.573223620707	0.600775216250067	0.179695576345164	3.3432944119675	0.000827900137092106	0.0395398170186083
ACHE	267.80002123716	1.15947453526934	0.346893591880603	3.34245014150744	0.00083042272245644	0.0395911989943257
TRIM67	11.1605718186933	-1.32599621040531	0.396820354833597	-3.34155290738893	0.000833111371151164	0.0396503057094309
TSPAN7	1201.98985215409	1.22513096696174	0.367004573291539	3.33818991947146	0.000843260907479071	0.0400636770730421
ALKBH6	163.955556612589	-0.491805973271345	0.14736658048726	-3.33729649996095	0.000845976473374973	0.0400836550989977
JAG1	8051.6754701096	-0.831147255706815	0.249063618583497	-3.33708817222608	0.000846610854608662	0.0400836550989977
HNRNPA1P70	3.06329945701617	-1.95765661438869	0.586838805709131	-3.33593585724631	0.000850127759179782	0.0401806498406112
FANCD2	990.250952916418	-0.599983712503614	0.180056656374742	-3.332194013727	0.000861641644664597	0.040612708111919
TMEM125	4.69901257206306	1.61172232596164	0.483709930955056	3.33200172834863	0.000862237207228859	0.040612708111919
HES4	607.737066522765	-0.821878092371926	0.246698251460233	-3.33151162404736	0.000863756926612711	0.0406143849719647
RP11.297C4.3	4.71419483381966	-1.76814785003279	0.530916184425187	-3.33037097361636	0.000867303486751347	0.0407111959149869
TNR	67.5477165186176	1.58387997488704	0.475701099278614	3.32956971781009	0.000869802854802291	0.0407586043228073
ELK1	3326.45759520958	-0.411425232020832	0.123805005647563	-3.32317122291517	0.00089000267356672	0.0416338686578237
PRPH	591.361221394736	-1.7238323776569	0.519525958389248	-3.31808709424551	0.000906362183612446	0.042326804636072
HIPK4	54.8497765732425	0.96823972861046	0.291919668549267	3.31680195932755	0.000910541339260544	0.0424495303069915
RP11.418H16.1	16.4707271918691	-1.09264777508872	0.329675800577292	-3.31430991651615	0.000918696196285165	0.0427568709311902
RECQL4	1730.33197858546	-0.650058823242084	0.196180916638878	-3.31356807980812	0.000921136792069455	0.0427976730929927
RP11.268G12.1	3.52680556328872	2.70646126749765	0.817079205509658	3.31236096726936	0.000925120960999978	0.0428450184979175
IGLV6.57	25.29196283265	1.95906314622027	0.591463633426652	3.31222924877125	0.00092555667303176	0.0428450184979175
PEG3	804.273406565926	1.48989528696096	0.449869643626892	3.31183779138616	0.00092685269863214	0.0428450184979175
IFI6	7920.8137247665	-0.840696777940913	0.253994884346915	-3.30989649694148	0.000933304761199301	0.0430705195530861
IGFLR1	98.4118324561999	-0.631284670980916	0.190801091695582	-3.30860093813358	0.000937633789902967	0.0431974516742165
CIT	2176.10338873034	-0.678011249927585	0.204970278516232	-3.30785153260106	0.000940146366443468	0.0432272429211221
ZNF833P	39.6522524706162	-0.703144021315128	0.212603673183171	-3.30729949669932	0.000942001198144165	0.0432272429211221
NTHL1	892.980531508934	-0.603651897529707	0.18253778534021	-3.30699693986445	0.000943019221804791	0.0432272429211221
PCP4L1	164.981557374958	1.8904128864204	0.572279550588886	3.30330322737398	0.000955530031892075	0.0437274830313688
DLEC1	41.781478205123	0.920459280128266	0.278732496776029	3.3023034299007	0.000958942742509397	0.0437481045190459
C1QA	11263.7310887392	-1.07472143087751	0.325481893124163	-3.30193922789901	0.000960188712991664	0.0437481045190459
RP11.203J24.8	23.6876005431959	0.92840727483705	0.281184928749215	3.30176755549045	0.000960776540815121	0.0437481045190459
APOE	21798.3246045693	-1.32837316500184	0.402481891220326	-3.30045448995038	0.000965283677883347	0.0437579876769652
RNU5A.1	2.52724081727008	-1.54074007818349	0.466864791219373	-3.30018477975034	0.000966211887103004	0.0437579876769652
AURKB	1341.77012244926	-1.04486424364266	0.316613772246477	-3.30012253171745	0.000966426231442908	0.0437579876769652
KAT5	1629.31447304939	0.373187674063886	0.113092991115853	3.29983025810672	0.000967433232804284	0.0437579876769652
RP11.304L19.11	56.1593873664174	-0.538786605174384	0.163299378663051	-3.29937939498291	0.000968988545357045	0.0437579876769652
HOOK2	1386.48780279651	-0.499011879354174	0.151292034337873	-3.29833544467884	0.000972598683808362	0.0437877275904844
CHST8	6.6905836423962	1.4128866090416	0.428388260953315	3.29814501895414	0.000973258546552414	0.0437877275904844
OR2W3	8.22203081431546	2.19437331855785	0.665487954933572	3.29738998623482	0.000975878966830763	0.0437877275904844
FBP2	4.29581863634712	2.24876362968538	0.681992939322868	3.29734151194896	0.000976047424913963	0.0437877275904844
EPYC	76.2987927852353	2.16906797353628	0.658083315261766	3.29603854593014	0.000980585601369357	0.0438768726481749
PXMP2	757.882509513793	-0.669290025227878	0.203070487450462	-3.2958507837883	0.000981241177398343	0.0438768726481749
WNT2B	223.146439401583	0.913459778257371	0.27730525823277	3.29405862722809	0.000987518990368541	0.0439857638008622
ETV2	82.8435056107375	-0.754684319997869	0.229112107484165	-3.29395215418734	0.000987893126600841	0.0439857638008622
HOXD13	219.369334829856	1.84830774246266	0.561201582986689	3.29348276714768	0.00098954407358821	0.0439857638008622
TBX1	152.090336871569	1.62903551246973	0.494713079185792	3.29288951719414	0.000991634330797904	0.0439857638008622
WFIKKN1	32.5591777859381	-0.795147859720525	0.241513174397174	-3.29235811547442	0.000993510142052059	0.0439857638008622
RP4.675C20.4	4.87758549118491	0.86228816330105	0.261913113759265	3.29226800034769	0.00099382856780492	0.0439857638008622
VARS2	1877.05614627062	-0.493601718256595	0.149941718640838	-3.29195718663824	0.000994927566788485	0.0439857638008622
SERPINA6	115.611040773176	-2.19504950174468	0.667042414097655	-3.29071953350079	0.000999314925601558	0.044053846036349
UQCRQ	5829.0570501576	-0.583826828614701	0.177441169220438	-3.29025575732881	0.00100096357484283	0.044053846036349
IGLV1.47	32.6882377759667	1.74561607776523	0.530556259542534	3.29016206362425	0.00100129694637905	0.044053846036349
AZGP1	14.6550052599378	1.8717581982035	0.568976258238606	3.28969472996632	0.00100296130158086	0.0440562423419932
RP11.771K4.1	4.15214671280249	-1.71484301702948	0.521505563402306	-3.28825450267842	0.00100810662743472	0.0442112916127863
MYBPH	64.0741021912059	-1.91768017318983	0.583868652689651	-3.28443762883285	0.00102186113187018	0.044742802775615
QPCT	594.552653936369	0.997159268354055	0.303693252706791	3.283442287461	0.00102547639265442	0.0447649579652191
HOXB9	234.683557751582	1.45104483922468	0.441935271762119	3.28338770842834	0.00102567497556428	0.0447649579652191
SLC2A1	5692.67894292073	1.06584651417213	0.324671554485931	3.28284538465261	0.00102765012652926	0.0447649579652191
YJEFN3	371.489772428273	-0.77266939933375	0.235408193603344	-3.28225363572382	0.00102980930019149	0.0447649579652191
RHCG	38.0417668704071	1.51639020925791	0.462025043676257	3.28205197967678	0.00103054606146635	0.0447649579652191
RP11.255G12.2	13.5277291485738	-1.34443995666428	0.410096343644999	-3.27835148373842	0.00104415292915842	0.045237357703824
C9orf171	3.28309311483743	1.36494770873719	0.416371568641307	3.27819623513501	0.0010447274014769	0.045237357703824
MCM5	5165.4475504867	-0.453115784057726	0.138264397518066	-3.27716890386422	0.00104853625138491	0.0452495611009175
KCNH3	301.472572643236	-1.27193078154364	0.388120124614975	-3.27715751097788	0.00104857856266578	0.0452495611009175
DACT1	1399.14003396165	1.03210113594381	0.314973889165496	3.27678316027497	0.0010499697178646	0.0452495611009175
FZD10	81.1123842011413	1.57464907306899	0.480672538135076	3.27592892903421	0.00105315059315834	0.0453152816546717
EVPL	85.9923581971881	1.53633188875663	0.469257646577711	3.27396239562866	0.00106050723272505	0.0455601898441974
MUM1L1	289.123625506201	1.82257024388983	0.557002547338565	3.27210396540971	0.00106750313358963	0.0457807280675689
AC084357.1	6.95574182154143	1.81188290304256	0.553802797730661	3.27171135730476	0.00106898652470864	0.0457807280675689
ATP6V1E2	261.551449890688	0.532495528686525	0.162878082665097	3.26928902878492	0.00107818106458712	0.0461023484585799
PALD1	1711.14003144367	-0.678010599983736	0.207465421504576	-3.26806556517555	0.00108285277263976	0.0462298735975971
NXPH2	43.4114218607518	-1.76059211329852	0.538801307244013	-3.26760920886404	0.00108460012556149	0.0462323474082799
RP11.34A14.3	4.21439508446714	1.43470206863698	0.439150672104301	3.26699276528996	0.00108696458096638	0.0462610773292785
RP11.22B23.1	206.313775846368	-0.620437759654514	0.19008073348743	-3.26407494474206	0.00109822111344805	0.0466675760723902
RPL13P12	513.873674995585	-0.814566501068167	0.249624805233792	-3.26316329142556	0.00110176018312681	0.0467453785603848
GINS2	930.440619138097	-0.701356462333882	0.214984668959195	-3.26235570996461	0.00110490404852142	0.0468061984393763
EPHA7	337.324298016383	1.65098661667525	0.506202919340519	3.26151144846449	0.0011081995748045	0.0468301505461396
RP11.291I6.2	11.0359050611517	1.02663277277094	0.314789180815571	3.26133436387835	0.00110889196645101	0.0468301505461396
DOHH	964.771756678719	-0.388860950986657	0.119279008600777	-3.26009543127711	0.00111374732972763	0.0469453174243426
CHMP4C	14.9390387085167	1.1738277809605	0.360095950827579	3.25976389976835	0.00111504992786022	0.0469453174243426
RP11.378A13.1	116.960565206547	0.667025371676689	0.204703790525109	3.25849057296704	0.00112006597604259	0.047054569907494
DAB1	362.843606660895	1.60403856654306	0.492365746899251	3.25781916521355	0.00112271926207807	0.047054569907494
TTC30A	378.730728788369	0.457200822594433	0.140340448387337	3.2577979324433	0.00112280326498551	0.047054569907494
GPR144	9.37523352071038	2.05770635952238	0.631868084150254	3.25654422360898	0.00112777360904811	0.0471080687271326
RP11.1112C15.1	3.5665252176209	-1.96063214023381	0.602091709591182	-3.2563679403011	0.00112847411526217	0.0471080687271326
STON1	2322.88908505373	0.754921312287679	0.231867922740004	3.25582470988961	0.00113063530891641	0.0471080687271326
EPHA8	9.04196094391783	1.8058879604614	0.554677879405596	3.25574180530983	0.00113096547371651	0.0471080687271326
TCF21	170.417963586548	1.68084596031415	0.516347377050853	3.25526193221779	0.00113287830445716	0.0471089786652791
PLEKHH2	694.616551809732	0.854867378429632	0.262642301972107	3.25487315642101	0.00113443020318713	0.0471089786652791
ACSF2	1238.71297545911	-0.711491326341087	0.21865562717296	-3.25393558601758	0.00113818084488569	0.0471931166683968
KLHL29	543.317323260915	0.865216365950328	0.265984992968585	3.25287662395494	0.00114243088309966	0.0472396693611479
RPS6KA2	2234.98681143882	0.781656228669082	0.240302891970955	3.2527957622897	0.00114275601538697	0.0472396693611479
LY6H	138.239748140524	-1.23246682235682	0.378973318620376	-3.25212029924302	0.0011454752913621	0.0472446419776638
LMCD1.AS1	23.7302997027448	0.662246404630611	0.203648534600386	3.25190851940143	0.00114632910447887	0.0472446419776638
TRAV17	5.55131531079117	-1.70162846071418	0.523599729876073	-3.24986504694516	0.00115459785736441	0.047457379388792
RP4.673D20.3	3.64472950233658	1.34223759902071	0.413024645447755	3.24977604560524	0.00115495924405962	0.047457379388792
CCDC87	21.7895295672001	0.685474322806796	0.210976024958586	3.24906265032414	0.0011578597391952	0.0475052318183148
AC093627.8	11.3283900870521	2.0319698813695	0.625616192488057	3.24794963072873	0.00116239845915441	0.0476200542413468
RP11.403P17.6	26.8544409951774	-0.602933823165626	0.185778512672774	-3.24544434386565	0.00117267484885618	0.0479692375393098
LINC01293	5.60453431850781	1.55488776407751	0.4796023236952	3.24203550995653	0.00118679233880377	0.0483805849743622
TYK2	4382.98335262514	-0.354583420098252	0.109379387413629	-3.2417755162347	0.0011878755072365	0.0483805849743622
ZNF425	196.224687918347	0.655396050404829	0.202174321057574	3.24173736296703	0.00118803453565634	0.0483805849743622
LRFN2	13.3379446584819	2.20962213476213	0.681788921051833	3.24091821755217	0.00119145360232861	0.0484477255294572
RP11.274E7.2	33.9625413157632	-0.627970471816041	0.193850944384484	-3.23945015491141	0.00119760396837067	0.0486255640926288
CGREF1	458.625674235963	1.27246895510365	0.392988121243615	3.23793236059378	0.00120399350965811	0.0488125724226723
GSG2	170.261101996148	-0.846027318312195	0.261355232575232	-3.23707817125361	0.00120760327093251	0.0488494097228548
RP11.335L23.5	3.59611633324935	1.41330257156839	0.436625908148499	3.23687290468279	0.00120847220574336	0.0488494097228548
PDE6G	45.886151753574	-1.0665120445972	0.329649912027145	-3.23528690797703	0.00121520554627745	0.0490491371378003
ASF1B	3034.05317425141	-0.80990427333015	0.250391896330062	-3.23454666545019	0.00121836008861624	0.049104038564171
TXNIP	29085.770216595	0.719241959038943	0.222708545497427	3.22952115480119	0.00123997707341496	0.0499017832221673
TPO	18.1908532386105	1.59303783597218	0.493616695548173	3.2272770559413	0.00124974388000246	0.050220985345297
HSD17B10	4633.05694951228	-0.475987220415334	0.147589623666224	-3.22507239053461	0.00125940819188868	0.0504855502761567
RAB11FIP5	2553.2194833668	0.492161280747868	0.152611273058445	3.22493398347701	0.00126001720524063	0.0504855502761567
RP11.737O24.5	13.2754977302721	-0.883615437744847	0.274160114537018	-3.22299047488011	0.00126859772141544	0.0506850727142942
NRK	748.672480962233	1.38500759022943	0.429730597514715	3.22296712926522	0.00126870111851537	0.0506850727142942
KIAA1841	852.526881370353	-0.538186782433376	0.167008550816037	-3.22251034335481	0.00127072577704997	0.0506919557066317
RP11.195C7.1	8.74417617967878	-0.792377824014726	0.246069237752505	-3.22014174242981	0.00128127228531314	0.0510382785442205
HIST1H3C	6.45866250129069	-1.51382133607656	0.470200552319595	-3.2195226666761	0.00128404208978574	0.0510742671934253
SPRED2	1666.93617173751	0.628577967736207	0.195495039399391	3.21531415665253	0.00130301835276645	0.0517538465047993
RP11.465L10.10	20.4587258814277	-1.32247490178764	0.411606301784678	-3.21296077356818	0.00131374230922855	0.0521041623686209
MUC16	11.8964829434019	-1.4757324445732	0.459502014010576	-3.21159080825974	0.00132002244872995	0.0522639779412348
ECI1	2982.85822146955	-0.516144479217245	0.160730699802222	-3.21123767800649	0.0013216457387291	0.0522639779412348
RP5.837J1.4	5.30239288762053	-0.818716949212162	0.254985720098385	-3.21083450828644	0.00132350130502359	0.0522639779412348
NABP2	2218.09233273552	-0.33653354197104	0.104850270196618	-3.20965831885757	0.00132892839655183	0.0524004974057393
TSPAN10	117.763767552668	-0.843519812786953	0.262866742912063	-3.20892556982431	0.00133231976910931	0.0524004974057393
HS3ST4	3.01515328916785	2.73787483431196	0.853358686661942	3.20835174833883	0.00133498115260742	0.0524004974057393
RNU6.678P	1.96793173293801	-1.16171784827084	0.362100950344632	-3.20827064155773	0.00133535772117108	0.0524004974057393
DCXR	1900.53619933736	-0.695199888472598	0.216706995057737	-3.20801775820563	0.00133653245593825	0.0524004974057393
RP4.635E18.6	13.3189052299856	-0.913094506700486	0.284762911755301	-3.20650783162772	0.0013435664769163	0.0525691909824264
NQO2	1779.96305449126	-0.561659781682213	0.175175442449249	-3.20627009031208	0.00134467710617914	0.0525691909824264
CMC2	1253.05418573938	-0.466543909926141	0.145545103011672	-3.20549369420369	0.00134831001031458	0.0526360224568741
DICER1.AS1	207.006165525821	-0.507027747486276	0.158209014870459	-3.20479681831929	0.00135157853299084	0.052688458880096
PSD	2120.42316596271	1.64977317062986	0.515034107186295	3.20323090764378	0.00135894972928136	0.0527107283919639
EPHA2	1032.98907522984	0.904684073493518	0.282436153524136	3.20314542669272	0.00135935317835516	0.0527107283919639
UBASH3B	487.74810535407	0.926981111892468	0.28941625358218	3.202933838093	0.00136035229978459	0.0527107283919639
GALNT9	54.3083628977185	1.66735388841993	0.520656600507642	3.20240612871182	0.00136284709578179	0.0527107283919639
GOLGA2P5	495.693077919732	-1.01897397397656	0.318240355074136	-3.20190056895575	0.00136524113491762	0.0527107283919639
FANCA	883.273664090528	-0.662292049986256	0.206862165873241	-3.20161034373047	0.00136661722601137	0.0527107283919639
JAKMIP3	58.391939401532	1.10330770539277	0.344628776718308	3.2014381268416	0.00136743439007535	0.0527107283919639
EGR2	476.755672505408	1.1785906632067	0.368147149694418	3.2014118924593	0.00136755891099519	0.0527107283919639
RP11.128M1.1	7.26370798254777	1.91367262057662	0.597981854919945	3.20021854314094	0.00137323418788082	0.0528550306407123
C1orf210	2.91966015357081	1.27515961600678	0.398552231603742	3.19947930256377	0.00137676072253834	0.052916339793517
CTD.3088G3.4	7.71205921168016	-1.10536149240045	0.345691018354957	-3.19754183276309	0.00138604305947074	0.053100261266894
GPR133	2075.07979908255	1.48050638994295	0.463059847645791	3.19722471613526	0.00138756783682391	0.053100261266894
TMEM116	516.375991709069	-0.441312489003362	0.138038207596122	-3.19703143563391	0.00138849793717299	0.053100261266894
MYH7	26.8084704366089	-2.45900686847405	0.769270084547196	-3.19654555385636	0.00139083862712269	0.053100261266894
AC004490.1	2.69472139096239	-0.934146234481914	0.292243929678719	-3.19646069469733	0.00139124780122645	0.053100261266894
RP11.464D20.6	1.96580018187108	-1.03178862157745	0.322930911837746	-3.19507542869064	0.00139794299615788	0.0532814875109422
CCNO	415.062623877335	-0.993640147586975	0.311052509885682	-3.19444504065296	0.00140099957994802	0.053317511345165
ZNF358	6449.41332555355	-0.560779865246296	0.175568649834138	-3.19407744934002	0.00140278477557987	0.053317511345165
RP11.113C12.4	14.8721700911711	-1.30168687951033	0.407717303753999	-3.19262113117406	0.00140987797389288	0.0535056372844913
EPHX3	23.3268020209969	1.11455830218181	0.349157891556576	3.1921326400873	0.00141226463383309	0.0535056372844913
SFI1	1456.52126769587	-0.452616361298408	0.141803339822365	-3.19185966892877	0.00141359993264223	0.0535056372844913
APOO	913.921169893067	-0.63547648798596	0.199205034100151	-3.19006239403805	0.00142242080329037	0.0537229860474147
STEAP2	783.528636681638	1.29664327334472	0.406485234028099	3.18989022183052	0.00142326846760124	0.0537229860474147
CMTR1	3231.69613316397	-0.445674123358372	0.139793358172467	-3.18809226121123	0.00143214832613053	0.0539837067395154
WDR34	4334.94579239864	-0.515662982813773	0.161797869946749	-3.18708140585218	0.00143716318995955	0.0540982226360838
KIFC1	2385.29563350238	-0.786720693790512	0.246884389352412	-3.18659553912709	0.00143957933514269	0.0541147363812018
CTC.510F12.2	83.5482301039289	0.821720159847669	0.25824888223975	3.18189241603303	0.00146316158422105	0.0549257611986192
CSRNP3	124.995120268046	1.28509595608775	0.403995248901178	3.18096799302236	0.00146783845696579	0.0550258454977067
PKN3	1322.95912443806	-0.539349362234611	0.169754597540158	-3.17722977786814	0.00148689180113461	0.0556638591379614
POLD2	6501.98972297099	-0.454360832003866	0.14303467999482	-3.17657809994275	0.00149023657788532	0.0556867276900535
CD27	144.302308561491	-1.13080546901152	0.356018041443681	-3.17625888965069	0.00149187747246288	0.0556867276900535
APBB1IP	509.518892257238	-0.987688138450289	0.311018590810304	-3.17565627146931	0.00149497975860807	0.0556867276900535
BATF	143.694548824371	-1.1082541079554	0.348998402503259	-3.17552773882697	0.00149564221487208	0.0556867276900535
MICB	501.849800363796	-0.713472905888815	0.224786594955059	-3.17400112774277	0.001503531065941	0.0558263765150059
FAR2P2	19.8228285729507	1.70128546921157	0.53605023281029	3.17374261791183	0.00150487071952887	0.0558263765150059
KCNQ5	130.11111913083	1.45992291723306	0.460043198964974	3.17344745127776	0.00150640168110112	0.0558263765150059
GTPBP3	1186.31706593127	-0.371818934847036	0.117173807337061	-3.17322568325758	0.00150755288476903	0.0558263765150059
C16orf59	487.484756720676	-0.672959006615785	0.212241461948701	-3.17072357322171	0.00152059767918957	0.0561684688189676
PCBP3.OT1	10.9454869374492	1.55988687759558	0.492072576009795	3.17003416496945	0.00152421014779914	0.0561684688189676
KEAP1	5765.99517473958	-0.297293998240278	0.0937846328856662	-3.16996494087376	0.0015245733153684	0.0561684688189676
BRICD5	344.275512058475	-0.681580421280301	0.215017500473684	-3.16988347357205	0.00152500081606712	0.0561684688189676
TPX2	6131.11270884979	-0.68768902849718	0.216980390805744	-3.16936026312557	0.00152774900224627	0.0561940580584293
SLC46A2	6.27562164168549	1.3028153130115	0.411342228069821	3.167229679104	0.00153898716364524	0.0565314398930412
PARPBP	448.803746846517	-0.617734686402615	0.1950896202106	-3.16641493143391	0.00154330478914608	0.0566140467289165
PRDM11	814.309347537806	0.706035145023592	0.223069825622722	3.165085833786	0.0015503720791672	0.0567971650849928
GALNT11	2263.82677463652	0.390987233037914	0.123559147143196	3.16437303168489	0.00155417457051916	0.0568603493273094
RP11.736K20.4	163.54212446355	1.01142295684953	0.319697253754016	3.16368985023484	0.0015578271069304	0.0568660843951587
CDC20B	28.4546073926858	-1.50067510221151	0.474361797270966	-3.16356652421208	0.00155848729432029	0.0568660843951587
GP1BA	48.996588722082	-0.828266298770386	0.261909657315149	-3.16241221213831	0.00156467904650765	0.0570159877319951
WDR35	820.14749570434	0.535842136327965	0.169510659849532	3.16111173659291	0.00157168195226266	0.0571950110447073
PIP4K2A	3876.28782858656	-0.431130816590763	0.136455061539971	-3.15950769231433	0.00158035928556634	0.0573710913201327
AC053503.12	99.7869778922618	1.44739364890294	0.458116801386572	3.15944240534761	0.00158071339820873	0.0573710913201327
PCYT2	1815.36902517863	-0.569875577202265	0.180462596647021	-3.15785978806967	0.00158931980128004	0.0575198234190263
ZNF503	1472.2488099864	0.785932203064007	0.248900536552725	3.15761554373959	0.00159065185801281	0.0575198234190263
FAM95C	50.7595030108122	-1.77536991272107	0.562265358776244	-3.15753031021707	0.00159111694541412	0.0575198234190263
RP11.249L21.4	11.46262660563	-1.92248246134455	0.609150118964103	-3.15600769251075	0.0015994464214821	0.0577446580082839
INO80C	597.100079368461	-0.468745767909054	0.14854863773954	-3.15550364541839	0.00160221264080357	0.0577683150569571
MRAP2	190.991112914516	1.17638837781597	0.372859077413085	3.15504824497719	0.00160471567256578	0.0577824330203092
CH25H	176.788472398647	1.11258314119278	0.352853901149895	3.15309859850506	0.00161547231891401	0.0580933186325898
DENND2D	399.614333577208	-0.821912198548128	0.260887551410561	-3.15044621372016	0.00163021270455409	0.0585464578383558
PCED1B.AS1	201.877852080131	-0.994554716945249	0.315802614040668	-3.14929222472229	0.00163666445193839	0.0587011263325636
C6orf141	25.355235928714	1.21737826294346	0.386672290960787	3.14834626478812	0.00164197066217281	0.0588143575144254
CASK.AS1	2.43068137608736	-1.04791382560505	0.333125035803076	-3.14570720594089	0.00165685783904696	0.059270028265829
SOCS5	1571.71482221201	0.495141993189163	0.157434460422076	3.14506742590984	0.00166048555244257	0.0593222553892212
SERTAD2	2439.08156332496	0.410946787719803	0.130698098834043	3.14424457115947	0.00166516208963853	0.0593475025135003
RP1.63M2.7	26.7473422332569	-0.662627044959131	0.210747172304754	-3.14418000352066	0.00166552955968604	0.0593475025135003
RP11.797H7.5	6.75238956406331	-1.18439493472093	0.376822212886719	-3.14311336809908	0.00167161084657679	0.0594867391773996
RP5.864K19.4	62.6837554332755	-0.778764442227521	0.248007947683902	-3.14007857207904	0.00168902527223315	0.0600283968830289
CCDC42	7.92076235280355	-1.20308068621186	0.383318104977905	-3.13859603965539	0.00169759295322451	0.0602546417093931
RPS7P15	1.16093372286345	-1.56334310867632	0.498307367180249	-3.13730683437964	0.00170507585677355	0.0604418470161463
LINC01239	42.3212422518259	1.55258213768836	0.494998547035889	3.13653877771038	0.00170954827851097	0.0604597994227455
LA16c.380A1.2	4.05887320599957	1.22046384806032	0.389121302482599	3.13646115047863	0.00171000090452404	0.0604597994227455
GMDS	1075.64802168463	-0.562468851727094	0.179384090858323	-3.13555594052835	0.00171528711195141	0.0605319154793825
DCAF15	1776.59798932891	-0.369755937424809	0.117936490366713	-3.13521231872414	0.00171729771261867	0.0605319154793825
LINC00087	82.5086585188682	0.916419139454458	0.29233525346738	3.13482253195547	0.0017195810574912	0.0605319154793825
CES3	54.6413787751097	-1.23762173542988	0.394826102344181	-3.13459958214975	0.00172088833746107	0.0605319154793825
POLQ	470.545994485051	-0.734268576140086	0.234300827915883	-3.13387102671143	0.00172516664327232	0.0606045062384986
NNT	5249.71151620747	-0.483675675728788	0.154368504549328	-3.13325362023074	0.00172879990204347	0.0606143809935647
SERPINB5	164.250159802194	-2.77270533813168	0.884980135200544	-3.13307070729149	0.00172987764218278	0.0606143809935647
RP11.504P24.3	284.2377320589	-0.796074337996091	0.254121509374143	-3.13265232823732	0.00173234509388028	0.0606232171855854
H2AFX	2641.51452593872	-0.664822693517427	0.212312799245614	-3.13133591511988	0.00174012996052978	0.0608178754787457
SPTB	799.825231281698	-1.39859933199584	0.446810902094041	-3.13018175125341	0.00174698178618489	0.060979468827469
SHCBP1	1139.76680803954	-0.755363140558023	0.241403043665954	-3.12905392196824	0.00175370122935504	0.0611360354681909
CTA.276F8.1	34.3597513445472	-0.686909909462827	0.219628229028682	-3.12760300668418	0.00176238051993016	0.0613105866972277
MCM7	8977.72666987799	-0.388884267754578	0.124355755783274	-3.12719154256375	0.00176484905201616	0.0613105866972277
ABO	74.8750242689886	0.985872908222774	0.315267987425437	3.12709487656415	0.00176542944958764	0.0613105866972277
AC006946.17	4.17158165292926	2.00130512651346	0.640288089302732	3.12563228951028	0.00177423248771888	0.0615382081862038
RBL1	973.473763067649	-0.377117175119445	0.120697297346506	-3.12448732001673	0.00178115198421948	0.0616810996292869
PCLO	325.789821666529	1.76495335010238	0.564928734687301	3.12420530543435	0.00178286011133399	0.0616810996292869
RP11.148K1.12	61.0095014555879	-0.509588218296699	0.163218238486765	-3.12212791303969	0.00179548909062364	0.0618529916713582
RP11.522N14.2	4.94661455605223	1.04039609664882	0.333234933546361	3.12210993480394	0.00179559874271419	0.0618529916713582
PRC1	5453.19116954749	-0.728053753702812	0.233201661048762	-3.12199214374626	0.00179631732120545	0.0618529916713582
TRPM1	2.52754702352925	1.82084876383687	0.583327104864919	3.12148835302025	0.00179939365513772	0.0618529916713582
CELF5	26.8321713970606	1.17005429390309	0.374872981316669	3.12120198631948	0.00180114447470625	0.0618529916713582
RP5.1031J8.1	4.93807919153931	-1.3877372364854	0.44463720115421	-3.12105517235861	0.0018020426887022	0.0618529916713582
TMEM63C	30.4124864136191	1.44888856069022	0.464269414697811	3.12079261485122	0.00180365005312226	0.0618529916713582
C18orf54	592.939041756977	-0.52089900488032	0.166936099546168	-3.12034968048513	0.00180636466279525	0.0618685548961886
COL9A1	50.6919731299674	1.66284591510966	0.532991528481005	3.11983554381938	0.00180952035826595	0.0618900734661188
CTD.3184A7.4	193.955341715819	-0.539965982962173	0.17310708412993	-3.11925988284157	0.00181305969273814	0.0618900734661188
ZNF185	2189.43143885702	1.16631881519177	0.373922813600302	3.11914323697425	0.00181377764086192	0.0618900734661188
SUV420H2	570.459300645666	-0.43515240689626	0.139535949500898	-3.11856842951759	0.00181731936282796	0.0619337007262141
RP11.148L24.1	19.4055282281638	1.70056487386591	0.54571684026653	3.11620376793824	0.00183195636663406	0.0623548730464027
CTD.2201E18.5	29.5534051076448	-0.671412857307506	0.215505724159771	-3.11552215109487	0.00183619557061567	0.0624215254477868
AC025335.1	363.059379148703	-0.69235610862033	0.222271394577463	-3.11491323450098	0.00183999024819365	0.0624729195186941
SMCO3	29.147581750292	-1.27653697380444	0.409910189031275	-3.11418698037547	0.0018445255772554	0.0625425207002405
LATS2	1512.69970351123	0.457655442621796	0.146973976125716	3.11385358609563	0.00184661100364665	0.0625425207002405
C19orf43	5994.1254144806	-0.511063724887615	0.16420314835702	-3.11238688174499	0.00185581119106604	0.0626205697465537
CYSLTR1	272.364959560337	-1.06305022657914	0.341594499082976	-3.11202384532813	0.00185809489974216	0.0626205697465537
PPP1R1B	98.9103639852751	1.69098971005628	0.54340122009249	3.1118621886209	0.0018591126443212	0.0626205697465537
ST3GAL4.AS1	231.137052226684	-0.502617868699157	0.161520195346438	-3.11179581984229	0.00185953063151553	0.0626205697465537
EMP1	5997.77298717145	0.86805662239687	0.278978478875047	3.11155407362325	0.00186105386699221	0.0626205697465537
SPG20	3394.12855104326	0.456502321621648	0.146723898718447	3.11130174163136	0.0018626450257142	0.0626205697465537
RP11.123K3.9	2.7371650447817	-1.10240101812103	0.354556902926793	-3.10923580678007	0.00187571950758138	0.0629827485208245
DNASE1L2	40.5249644682129	-0.786035258619452	0.253028583454242	-3.10650776243862	0.00189311338184891	0.0634213077668783
SPRYD3	3181.47324959214	0.439660660694071	0.141531060499371	3.10646058287695	0.00189341549534238	0.0634213077668783
NUSAP1	4045.94518226153	-0.736987706076172	0.237352995320186	-3.10502804096483	0.00190260986430418	0.0636513710837998
CTD.2530H12.8	14.7582341390876	0.666371008401724	0.214696283046004	3.10378455997274	0.00191062402402267	0.0637285698367649
UBE2SP2	6.79390352376498	-0.950963134110106	0.306404546441036	-3.1036195290043	0.00191168996569778	0.0637285698367649
C14orf80	688.212348060465	-0.604039221210753	0.19462619467583	-3.10358645308173	0.001911903670101	0.0637285698367649
MIR4489	3.75375161831229	-0.667467727242764	0.215190971360875	-3.10174596555644	0.00192382974101193	0.0640480835675579
CYBRD1	8651.86501279071	0.623743393745792	0.201384845470157	3.09727076180726	0.00195311390646131	0.0648564579147987
S100A2	546.872848768866	1.18419327213463	0.38236979072554	3.09698438751566	0.00195500170005605	0.0648564579147987
RP11.324E6.10	14.1361606429271	-0.716761562109541	0.231441030338995	-3.09695113722787	0.00195522099611594	0.0648564579147987
CDKN3	1160.45931954632	-0.708670034409714	0.228956107471021	-3.09522223380484	0.00196665481990471	0.0649507962686386
FAM27E3	22.9339187430896	-0.836259694712223	0.270216902455603	-3.09477196693727	0.00196964264473217	0.0649507962686386
RP11.589P10.5	98.50519481624	-0.720809630332235	0.232916534349976	-3.09471215662671	0.00197003983990402	0.0649507962686386
YPEL5	3957.19194031255	0.360721419714093	0.116571402267351	3.09442464187568	0.00197195022731586	0.0649507962686386
FATE1	19.1979389796468	-0.917351525291354	0.296479515397905	-3.09414808662304	0.00197378939891504	0.0649507962686386
COG5	1508.05270467714	0.377992322612197	0.122167460820273	3.09405074046913	0.00197443715328289	0.0649507962686386
SLAIN2	4215.66575453981	0.358710954942049	0.115952422658274	3.09360465886267	0.00197740793674571	0.0649507962686386
ZBED9	66.1965651613842	1.71548689358509	0.554554600179901	3.09344993807387	0.00197843929354129	0.0649507962686386
OCIAD1	4808.31183324314	0.280148859982196	0.0905751991655288	3.09299744922687	0.00198145838343503	0.0649507962686386
PLEKHA3	1440.00375589272	0.323187043149343	0.104491639775572	3.09294641986178	0.00198179912608029	0.0649507962686386
FRRS1	153.409417598353	0.905306560206702	0.292833317256466	3.09154220799892	0.00199119671703445	0.0651738181617417
RARA	3285.86762264733	0.399411065033655	0.129208281959824	3.09121875916474	0.00199336716368405	0.0651738181617417
ANTXR2	7606.9732523462	0.726991920898314	0.235233709036585	3.09050911060221	0.00199813674611309	0.0652518021409677
DDC	4.5196443259972	1.54066421005316	0.498657127710575	3.08962636737317	0.00200408432349311	0.0653334521674552
HCG23	47.2562010339488	1.48686701659056	0.48127556746112	3.08942966798471	0.0020054118183389	0.0653334521674552
RAD23BP1	1.86189853656539	-1.20587978168826	0.390419081640686	-3.0886804421052	0.00201047562646046	0.0654205422041818
LTB	327.303353127284	-1.25123032045149	0.405790718576322	-3.08343750404473	0.00204624084014079	0.0662430962578792
PKN1	15031.0878972455	-0.421482669130985	0.136701327412517	-3.08323757427092	0.00204761616456103	0.0662430962578792
RP11.29H23.4	1.95316494371735	-1.04768742192251	0.339814372044752	-3.08311686647711	0.00204844692854754	0.0662430962578792
PRODH	146.211151030672	-1.53809355888693	0.498948805762722	-3.08266808362375	0.00205153836192739	0.0662430962578792
AIF1	1419.99572040793	-0.912453425063481	0.296022087550573	-3.08238291478029	0.00205350496630153	0.0662430962578792
XXbac.BPG294E21.9	2.90817540077137	-0.836466367156149	0.271393106811586	-3.08212090197584	0.00205531340456122	0.0662430962578792
CUL9	1739.32989485462	-0.383386907027969	0.124396872036629	-3.08196581434201	0.00205638452298855	0.0662430962578792
NDC80	1619.95527688649	-0.613643053465881	0.199108778138913	-3.08194876791297	0.00205650228600804	0.0662430962578792
CLDN1	264.478092851162	1.1079901547674	0.35952710911419	3.08179863681849	0.00205753971421462	0.0662430962578792
ACTG1P9	5.83061668136619	-0.867039243336007	0.281384455923636	-3.08133311945032	0.00206075956172125	0.0662687969048927
ARAF	4310.93849569049	-0.325012965166057	0.105530733948622	-3.07979441632889	0.00207143524038913	0.066518095633582
RP11.188P20.3	59.467884780628	-0.721510596672294	0.234293516090559	-3.07951585136234	0.00207337336751609	0.066518095633582
BRI3BP	727.562128477567	-0.510636441294634	0.165842929198447	-3.07903655442318	0.00207671198929832	0.0665471900458288
RP11.479J7.2	10.2295274783122	-1.74772046203083	0.567884024985876	-3.07760103319388	0.00208674087365572	0.0667903517525876
UCP2	2611.6678429857	-0.678548498799519	0.220553218403563	-3.07657491335233	0.00209393678966956	0.0669423763856277
C1QB	10464.7774432853	-0.99703060011636	0.324154485554766	-3.07578838037677	0.00209946794520797	0.0670408865677496
ZNF672	2171.45099971613	-0.33128180927837	0.107753608565901	-3.07443818993552	0.00210899417819879	0.0672665905368158
ASNA1	4140.59437650168	-0.355654934776002	0.115713100812826	-3.07359263797881	0.002114980116689	0.0673298122820264
TIMP3	463.470113994255	0.843582863472069	0.274487674451586	3.07329961229592	0.00211705817384086	0.0673298122820264
NDUFA3P4	6.41362912108582	-1.13521055165882	0.369443754253176	-3.07275610587499	0.00212091752918583	0.0673298122820264
ARHGAP33	1795.72351341007	-0.612569670449136	0.199373809151941	-3.07246810930066	0.00212296516257107	0.0673298122820264
VSX1	10.6797611952133	1.72661322063577	0.5619709887599	3.07242412005268	0.00212327808226956	0.0673298122820264
SAMD1	2990.5937247032	-0.442024079093267	0.143924911901409	-3.07121312949673	0.00213190915047893	0.0675034280818936
TNFAIP8L2	242.39581159071	-0.894186827660983	0.291196066916696	-3.07073799838371	0.002135304321258	0.0675034280818936
RP11.576I22.2	52.6447266201187	-0.974549976282464	0.31737896421529	-3.070619310552	0.0021361532090521	0.0675034280818936
IRAK3	421.681242826052	0.874805726163459	0.284948319336266	3.07005048565001	0.0021402258970578	0.0675541198372362
RPL7P13	4.40300235819847	1.22668149378116	0.399744622681517	3.0686629017108	0.00215019064248775	0.0676434666018114
FOXM1	3228.54549474352	-0.6745225897049	0.219812872072705	-3.0686218843535	0.0021504858493046	0.0676434666018114
FANCI	3108.72697590088	-0.67134719244478	0.218807589584042	-3.06820797999295	0.00215346684849584	0.0676434666018114
DCST1	37.2198744668737	-0.880411556612559	0.286970446226774	-3.06795200756258	0.00215531229451126	0.0676434666018114
DOK3	435.941658592804	-0.569836864221974	0.185741751837546	-3.06789862044784	0.00215569737427098	0.0676434666018114
RP1.228P16.1	16.3939365357585	-0.698268322923788	0.227627273303479	-3.06759516463055	0.0021578873910466	0.0676434666018114
SIVA1	4761.18246967317	-0.416892950261276	0.135965123671662	-3.06617564124767	0.00216815909333936	0.0677655673679841
NCAPG	1758.90645813737	-0.71607727913261	0.233548573732003	-3.06607429747916	0.00216889413057025	0.0677655673679841
STX10	2529.63528024909	-0.46456617684754	0.151520399286462	-3.06603057433368	0.00216921132114135	0.0677655673679841
HHIP.AS1	111.839772936301	1.37782989920162	0.449487921748677	3.06533242059396	0.00217428185764849	0.0677987945986877
RP11.767I20.1	15.2904793803036	2.15972653294353	0.70459516115491	3.06520205078261	0.00217522990782898	0.0677987945986877
COMTD1	290.547566121272	-0.690413281093663	0.225313605463527	-3.06423253790338	0.00218229210832491	0.0679415310994532
ACE2	22.0002809823813	1.3025567051345	0.425470445579749	3.06145049242991	0.00220267414574996	0.0684189263165256
HHIP	101.021939012507	1.4885224755062	0.486223847378811	3.06139339633524	0.00220309426873355	0.0684189263165256
FAM3C	1424.75697639325	0.607788981388728	0.198551350060708	3.06111734421798	0.00220512654429495	0.0684189263165256
RP11.514O12.4	7.09937437092992	-1.17255039379574	0.383266023517756	-3.05936431054765	0.00221807240175463	0.068742660641469
TRMU	1631.63757933733	-0.395623002273759	0.12944199153764	-3.05637295574765	0.00224032398462053	0.0691670125766473
RP11.142E9.1	35.9623464659573	-0.646276077850117	0.211475571409992	-3.05603183167273	0.00224287443106297	0.0691670125766473
LINC00237	22.9092353656397	2.27260771037096	0.743659180203047	3.05598017327031	0.00224326089186535	0.0691670125766473
RP11.115C21.2	273.608333930586	-0.438733803100371	0.143572096399653	-3.05584312065134	0.00224428648959044	0.0691670125766473
LCA5L	87.5283315658431	0.565475542904564	0.185066948237912	3.05551881785838	0.00224671503678562	0.0691670125766473
LINC01479	13.7432140340493	-1.57717149250191	0.516176258444813	-3.05549018711897	0.0022469295542147	0.0691670125766473
HIST1H3F	2.54913688584884	-1.41000321245285	0.461563263980446	-3.05484279726514	0.00225178517187228	0.0692385988915245
KLF14	15.8433840484224	2.1815054960428	0.714199473402273	3.05447648351046	0.00225453689182636	0.0692454058156231
RP4.668J24.2	13.4561470081349	2.56148852218852	0.838732962587188	3.05399768036689	0.00225813826852896	0.0692782644131878
NDUFA11	4241.59831629659	-0.536782177390322	0.17584414160243	-3.05260199457737	0.00226866618618308	0.0694458218393093
RP1.317E23.3	39.0675842651255	-0.523751739221588	0.171575575223707	-3.05260080602206	0.00226867517080839	0.0694458218393093
LAIR2	8.00763920634187	-1.28612387359703	0.421510218784917	-3.05122821768005	0.00227907273683934	0.0696861502975926
RP11.809F4.2	27.220207770533	-0.778373070938317	0.255134838120571	-3.05083020677277	0.00228209588427347	0.0696965365782384
BMP5	56.0983293874368	-2.89926121276363	0.95041751492835	-3.05051323994402	0.00228450607727398	0.0696965365782384
CBLL1	1420.41407388743	0.282635484226403	0.0926954403788167	3.04907644940638	0.00229546059748673	0.0697702337557185
CNTNAP1	3094.03840096275	0.648395089284793	0.212653275722885	3.04907172053035	0.00229549673115556	0.0697702337557185
RP11.29H23.5	62.0722155386957	-0.57947233278721	0.190076304639882	-3.04863004299813	0.0022988739174849	0.0697702337557185
FAM3C2	75.6107484032869	0.730897842959304	0.239748176222722	3.04860647732441	0.00229905423484825	0.0697702337557185
RYK	3029.91051965415	0.29148984626313	0.0956166476423787	3.04852610346001	0.0022996693286435	0.0697702337557185
SLC1A4	3520.63453767723	-0.47974537944995	0.157397367430358	-3.04798858635433	0.00230378677399532	0.0698148987512893
SGOL1.AS1	3.63374109155079	-0.914582897191144	0.300095063188882	-3.04764392813586	0.00230643044894164	0.0698148987512893
NT5DC4	7.58174823968367	-0.962592813641951	0.315880107574056	-3.04733596880987	0.00230879497807194	0.0698148987512893
CHRM5	11.137040465468	0.977871229940688	0.320985456521252	3.04646584471014	0.00231548784409001	0.0698374861361973
HLA.DOB	105.891437138166	-1.1010304080425	0.361480210523483	-3.04589401020882	0.00231989598175066	0.0698374861361973
HPGD	826.353211903106	1.28784259224482	0.42292333674103	3.04509701963647	0.00232605261606363	0.0698374861361973
AD000864.6	27.8655260235684	-0.812553460789958	0.266859273181599	-3.04487624170741	0.00232776073755586	0.0698374861361973
LINC00324	123.873268571164	-0.748997669220014	0.24598826966288	-3.04485116402702	0.00232795483196093	0.0698374861361973
SNORA46	3.24875680141435	-1.01118557650613	0.332149491776704	-3.04436888070243	0.00233169045787421	0.0698374861361973
RP1.35C21.2	5.89602229236821	1.8707242166301	0.614531014810963	3.04414939448671	0.00233339235102158	0.0698374861361973
RBM10	4936.21451843837	-0.285617525661002	0.0938395938224089	-3.043678196237	0.00233704985903484	0.0698374861361973
BLNK	344.374764360696	-0.816278398075664	0.268195680250615	-3.04359263845299	0.00233771453366039	0.0698374861361973
SDAD1	1411.21767103564	0.389292399925801	0.12792200072797	3.04320130790983	0.00234075687900727	0.0698374861361973
WDR86	187.667157614726	1.2122164924694	0.398357754640979	3.04303475543464	0.00234205281784754	0.0698374861361973
ZNF878	16.1484312055731	-0.779447207170859	0.256148157541377	-3.04295457227698	0.0023426769543853	0.0698374861361973
BCR	2219.40410857068	0.393437791410926	0.129327020542339	3.04219326913298	0.00234861044361748	0.0698374861361973
RP11.1055B8.9	13.4415581634126	-1.12410734079952	0.36952047416534	-3.04207051947153	0.00234956842439161	0.0698374861361973
AC130469.2	11.6505577034994	-0.864577329767692	0.28422978086706	-3.04182526943604	0.00235148351208581	0.0698374861361973
CACNA1D	209.968722615289	1.41758098272453	0.466055171391956	3.04165916342194	0.00235278139839455	0.0698374861361973
SERPINE1	8656.23204012858	1.28354331329317	0.421990443555047	3.04164071223982	0.00235292560906139	0.0698374861361973
ZNF93	591.804250763611	-0.504634288575753	0.165965645979813	-3.04059485079902	0.00236111309196475	0.0700045729953492
RP11.415F23.4	14.4321012013406	-0.672534502220898	0.221274034792411	-3.0393737921028	0.0023707051010724	0.0702128958830599
ZFAND2B	1594.90215398346	-0.492115661284863	0.161954226310473	-3.03860956577605	0.00237672660843193	0.0702982410695813
PVRL3.AS1	36.0224965266268	1.11993132490849	0.368597746372664	3.03835640865856	0.00237872437442199	0.0702982410695813
RP5.1091N2.9	15.499039465767	-1.02437034928997	0.33733432002353	-3.03666211377044	0.00239213436927383	0.0705501898054593
CD180	198.893363827654	-0.889419118476665	0.292896971129662	-3.03662791406242	0.00239240576406732	0.0705501898054593
SPAG5	2167.48885713208	-0.627195203092741	0.206588235918635	-3.03596765955136	0.00239765079980275	0.0706287532695395
UBALD2	2486.03377025939	-0.604484134782504	0.199143674774971	-3.03541719547739	0.00240203170858389	0.0706817201474266
RP11.973H7.4	3.6319697230615	-1.86095413283691	0.613307283412438	-3.03429322163365	0.00241099970037642	0.0707615801107748
MMP1	150.148306459833	-1.29292234926079	0.42611527798386	-3.03420791523407	0.00241168159500949	0.0707615801107748
ULK4	345.772025372035	-0.62705761428515	0.206669701058922	-3.03410519816049	0.00241250289568636	0.0707615801107748
UBA1	22718.053026489	-0.320095820774464	0.105524579645965	-3.03337688573018	0.00241833365125762	0.0708566581373833
EIF4G2	37915.034172866	0.301886289455091	0.0995343786669528	3.03298512029917	0.00242147539655175	0.0708728296278452
SCARNA12	5.22361849487075	-0.783761211338798	0.258471744788043	-3.03228970726187	0.00242706143269659	0.0708729925553444
TIMELESS	2665.65047517753	-0.56035243415946	0.184808094877723	-3.0320773261053	0.00242876977381258	0.0708729925553444
COL17A1	45.8396772020799	1.12185010517128	0.37000118548389	3.03201759665748	0.00242925042084751	0.0708729925553444
BABAM1	2931.31078509962	-0.383389636231363	0.126527472113816	-3.03009006523492	0.00244480821367099	0.0712509281952294
RBFA	1117.90278474827	-0.363871853413132	0.120098907516389	-3.02976822135937	0.00244741479609026	0.0712510141593683
PDGFD	672.989876433346	0.825233683248733	0.272465794232567	3.02876067644787	0.00245559125624069	0.0713494587700485
EID1	13406.7396146101	0.335052042584938	0.110625363858618	3.02870906723654	0.00245601074915536	0.0713494587700485
MRGPRF	6084.40635470909	0.952343974420427	0.314481811043949	3.02829588540921	0.00245937156191311	0.0713713278508104
GPRIN3	768.448984293253	-0.769035392248147	0.254272197673765	-3.02445725204622	0.00249079668828816	0.0722067184022181
PDE4C	223.96567018469	-1.40925870534949	0.466109871878318	-3.02344745385997	0.0024991242512452	0.0722972127332945
ENSG00000188603	878.342973547505	-0.487551442888656	0.161257296257549	-3.02343803476634	0.0024992020480047	0.0722972127332945
RP11.254F7.2	382.977236904987	0.643126728819368	0.212761263981367	3.02276230543399	0.00250478900114352	0.0723823186961916
NDUFB10	5317.46882791616	-0.505348855773395	0.167223617124875	-3.02199452722054	0.00251115088227044	0.072489615025541
BDKRB1	136.868088556056	1.15236406483762	0.381431724745374	3.02115421995086	0.00251813068504917	0.0726145040327244
EGLN2	1365.91519917537	-0.513432100221695	0.170007807488751	-3.0200501247901	0.00252732855322881	0.0727751533822886
PCK2	1636.04525846565	-0.574569103733088	0.190264281288838	-3.01984744504325	0.00252902034884734	0.0727751533822886
SHISA9	4.18041698005157	-1.70701010389737	0.565480770295869	-3.01868815628201	0.00253871701407051	0.0729242590316938
TMEM110.MUSTN1	32.9763598964577	-0.685456602335475	0.227078332312913	-3.01859096530143	0.00253953149372229	0.0729242590316938
PLCH1	25.7759634713799	1.46246282985257	0.484542391282963	3.01823505262415	0.00254251615288226	0.0729334350521761
GLTPD2	36.2638145803034	-0.660043072280358	0.218728479044237	-3.01763663865128	0.00254754164388375	0.0730010729073535
NDUFB7	5018.59883883489	-0.554357699188969	0.183761832312632	-3.01671839147667	0.00255527076733989	0.0730898956827355
YIPF4	2812.91193847204	0.353430384138916	0.11716051570226	3.01663390623072	0.00255598297772337	0.0730898956827355
IL18	267.831625478294	-0.961315565265962	0.318750776207778	-3.01588462529524	0.00256230736307053	0.0731272117480807
AC012360.6	31.4319312410053	0.883906125933916	0.293087271562063	3.01584617176644	0.00256263231990095	0.0731272117480807
RAD51D	967.0083275351	-0.311668015033897	0.103371635788599	-3.01502450509031	0.00256958493974281	0.0732492306885434
ASS1	3203.90932050475	0.771100847499413	0.2558849476635	3.01346700749841	0.00258281122860474	0.0735496483683636
NUDT1	1245.04261047313	-0.575172742761529	0.190956565784394	-3.01206057198864	0.00259480815234504	0.0736979236477716
AC006077.3	20.1294200017725	-0.587593623519884	0.195101245265423	-3.01173692008218	0.00259757611135712	0.0736979236477716
ADAMTS20	1.8876660363394	1.68563283087978	0.559730456149244	3.01150815068446	0.00259953423759816	0.0736979236477716
LDLRAD3	1031.28183753604	0.723136246162792	0.240142106379165	3.01128468083401	0.00260144830591442	0.0736979236477716
HILPDA	1151.17471563569	0.851746072578335	0.282855679729023	3.01123906507485	0.00260183917322598	0.0736979236477716
RP11.104N10.1	13.0680777333234	-0.545695152692768	0.181250294792549	-3.01072698015387	0.0026062307565443	0.0736979236477716
TRIM29	199.468076763059	1.47516833619932	0.489982920053141	3.0106525673167	0.00260686947639563	0.0736979236477716
GLB1L3	147.594573873555	1.72676621091013	0.573651759172396	3.01012972295479	0.00261136132866319	0.073712015847548
SAMD11	1095.67563923053	1.73022961951289	0.574834154286747	3.00996314608299	0.00261279390689915	0.073712015847548
WDR83	496.333650799287	-0.436769066682426	0.145122651264602	-3.00965468089517	0.00261544863655518	0.073712015847548
GIPC2	170.952228907061	0.925814854477463	0.30769593842428	3.00886277283538	0.00262227529368286	0.0738283803363429
MT1JP	4.42924359556775	1.66705192138271	0.554117759176659	3.00847950417563	0.00262558511396196	0.0738455932463339
GINS1	1080.25665910892	-0.634419391721166	0.210978073409065	-3.0070394589825	0.00263805517393797	0.0740922976277074
SYT16	27.139448665879	1.51987909551032	0.505501575917068	3.00667528632921	0.00264121728903897	0.0740922976277074
DENND1C	253.188861716476	-0.899564388605605	0.299235977277137	-3.00620398920974	0.00264531471022179	0.0740922976277074
HSH2D	68.3619614481805	-1.12370281763314	0.373808835619897	-3.00608950499971	0.00264631090391316	0.0740922976277074
SERPINB7	14.2342144871255	2.59666347701486	0.863853376563603	3.00590765454243	0.0026478939954651	0.0740922976277074
PCDHGA9	125.90569993554	1.09087599608971	0.362977767004996	3.00535210487064	0.00265273567313668	0.0741519554964844
CH17.340M24.3	204.342919778522	-0.659211094857817	0.219437366492678	-3.00409681994527	0.00266370543411008	0.0743399321784001
TMEM205	2513.1497468045	-0.517765563922704	0.172360938211879	-3.0039611601918	0.00266489342494374	0.0743399321784001
STAC3	197.390832264755	-0.779260806111705	0.259447037614003	-3.00354482085498	0.00266854238909273	0.0743659175355516
LYPD1	119.2944286322	1.04514069317068	0.348117750261098	3.00226200010427	0.00267981427208951	0.0746040665005101
CLPP	3296.0042024634	-0.390625513782788	0.13016189051413	-3.00107437161403	0.0026902884910571	0.0748195476079965
GPX4	11972.0133284926	-0.527071099720283	0.175704405133086	-2.99976030379578	0.00270192142179287	0.0750434050883017
TMEM106B	2654.64554429982	0.40021124402044	0.13342727162336	2.99947109126357	0.00270448787105158	0.0750434050883017
TMEM128	923.368983447059	0.35319938157853	0.117763067531603	2.99923727346646	0.00270656437996616	0.0750434050883017
IGSF11	102.41989326798	-1.47376473619214	0.491543344096924	-2.99823963418685	0.00271544067806456	0.075213309307606
ENTPD8	16.3269134481782	-1.37792247989618	0.459652236604199	-2.99774997305778	0.00271980706502406	0.0752458734205161
SAPCD1	30.4200464365628	-0.787610389839733	0.262769046097761	-2.99734843786246	0.00272339240488559	0.0752458734205161
BCL7C	4015.67317483439	-0.470309083579285	0.15692701783854	-2.99699242397621	0.00272657489240539	0.0752458734205161
RP3.428L16.2	438.657592456741	0.96417571804029	0.321726912080567	2.99687617614917	0.00272761479328919	0.0752458734205161
LINC01010	5.33232014368218	1.6047473914028	0.535580187555845	2.99627848208159	0.00273296721948052	0.0753176041574057
PRSS36	125.324873889328	-0.580042867200823	0.193631967610013	-2.99559455166549	0.00273910367425944	0.0754016292847101
ACTN3	15.5306734271438	1.09916802068068	0.366961203268202	2.99532487601237	0.00274152675357329	0.0754016292847101
FMN2	126.834795697382	1.42707760420025	0.476493976668013	2.99495413180119	0.00274486114684783	0.0754175403058612
CTD.2521M24.5	4.37283570370402	-1.25023830961649	0.417589926760696	-2.99393790294407	0.00275401989377082	0.0755932882777655
CTB.55O6.12	173.245714559685	-0.367366889044935	0.122751533597685	-2.99276822274963	0.00276459617076986	0.0758075539171223
CORO1A	2149.259259015	-0.84506005084367	0.282447463650166	-2.99191941723486	0.00277229430661891	0.0758526551096118
CTD.3116E22.8	8.57663955635496	1.21824090535965	0.407207992931137	2.99169202596096	0.00277435992602064	0.0758526551096118
GYPE	21.4825753353445	1.30953203482228	0.437726036845988	2.9916704161764	0.00277455630215309	0.0758526551096118
CDKN2AIPNL	1340.32701171254	-0.414586684673757	0.138611872039991	-2.99098972239654	0.00278074852144879	0.0759460718941793
AC004543.2	2.98015622962622	1.44372374826931	0.482849763720395	2.99000611938857	0.00278971858201903	0.0759881050954605
EIF4HP2	20.9222071700041	-0.75835398405986	0.2536332398287	-2.98996292667334	0.00279011308711401	0.0759881050954605
SGOL1	430.914419969288	-0.722604930092583	0.241681351855727	-2.98990768027458	0.00279061776002842	0.0759881050954605
HCG4P7	129.939892171537	-0.861451150462995	0.288180825852031	-2.98927296053109	0.00279642187527547	0.0760496543643902
RP1.151F17.2	227.533762899503	0.673442112568779	0.225302836197052	2.98905297392608	0.00279843608656511	0.0760496543643902
PKMYT1	861.748122922828	-0.662695856230075	0.221774325589687	-2.98815408171347	0.00280668017608232	0.0761980254947111
MAGEB17	5.92323321541775	1.19839622665942	0.401136838760828	2.98749980271432	0.00281269476338152	0.0762856341870157
ENPP6	189.08488515939	1.17488891619293	0.393359945785741	2.98680363565252	0.00281910733752969	0.0763618093547493
NDUFA9	2044.42427315092	-0.449820196898006	0.150630380037856	-2.98625149046931	0.00282420277909972	0.0763618093547493
TMEM198B	682.32105103026	0.53266932980932	0.178382761863446	2.98610316515384	0.00282557302344348	0.0763618093547493
KIAA0101	1804.69004594806	-0.744205871232525	0.24926491352116	-2.98560218812886	0.00283020558917618	0.0763618093547493
RHEBL1	133.553766418091	-0.579293336005807	0.194035322258222	-2.98550454249193	0.00283110933165977	0.0763618093547493
AP001046.5	164.599949623301	1.17593608510639	0.393907110584339	2.98531317031051	0.00283288130847002	0.0763618093547493
BIRC5	3611.66842145369	-0.755978243840647	0.253325712854123	-2.9842144144127	0.00284307465711365	0.0763618093547493
MESP1	184.048992971034	-0.792845571019274	0.26568288675993	-2.9841800527246	0.00284339397578947	0.0763618093547493
HCG27	96.8293830675017	-0.824623452433764	0.276370648917192	-2.98375914976718	0.00284730802999215	0.0763618093547493
CAPN5	1474.34563890067	0.68764606045023	0.230464006117156	2.98374601759142	0.00284743022761206	0.0763618093547493
TERT	2.65623547720603	-2.51663136895912	0.843475966239749	-2.98364324496212	0.00284838671362839	0.0763618093547493
CCNI	20568.7985022195	0.367928471566419	0.123317839104793	2.9835786471555	0.00284898806369945	0.0763618093547493
RP6.24A23.7	68.169134271442	-2.05979554502543	0.690482290971214	-2.98312581214527	0.00285320682390651	0.0764000566957196
TDRD5	6.20292468112737	-1.92020589303131	0.64392991970754	-2.98201067268846	0.0028636201583777	0.0766039386648722
ZDHHC19	10.6605223519103	-1.22680341799386	0.411472679400092	-2.9814942265	0.00286845455340702	0.0766583274497428
RP11.66N11.8	105.518393425719	-0.615743734963495	0.206674713953686	-2.9792891601702	0.0028891798661386	0.0771368743578039
GNRH2	4.23568878813121	-1.08340302669981	0.363786408373352	-2.97812947862504	0.00290013441948064	0.0773336049264617
BLOC1S6	3454.82483260524	0.298944373546136	0.100387400346509	2.97790731221513	0.00290223736413116	0.0773336049264617
F2RL2	213.654683307321	1.27504606781742	0.428246062148623	2.97736787448829	0.00290734927496576	0.0773336049264617
GPR89B	137.03677636294	-0.360704799781792	0.121153775582048	-2.97724770069188	0.00290848920492296	0.0773336049264617
LINC01050	48.0917551474484	-1.84562679303346	0.619958416330872	-2.97701707794617	0.00291067796076356	0.0773336049264617
AC005785.2	58.3343126305304	-0.515316534904179	0.173128456119123	-2.97649818207592	0.00291560810857336	0.0773750898077871
SCLY	149.254482276822	-0.52264282246921	0.175619242591963	-2.97599975239346	0.00292035097788418	0.0773750898077871
COX6B1	9152.25725994416	-0.617765743565399	0.207585307148051	-2.97596083293508	0.00292072161702273	0.0773750898077871
AC005624.2	14.4520795417086	-0.840320574488616	0.282464350303214	-2.97496152553965	0.0029302529711064	0.077552517221758
SYNPO2L	107.55939174887	1.34592793157593	0.452535209189865	2.9741949449313	0.00293758381661068	0.0776714190583266
AKAP8L	2889.45899690562	-0.253570073734572	0.0852946527724624	-2.97287186819333	0.00295027584264293	0.0779317072488092
RP11.506H20.2	2.60443161737012	-1.14511794780237	0.385286863129466	-2.97211780983453	0.00295753174904226	0.0780361853222838
SLC18A1	2.72723538129515	-1.54338589189841	0.519331823822399	-2.97186850699567	0.00295993423827123	0.0780361853222838
HAS1	67.4704111569239	1.61801143742655	0.544726644100323	2.97031814938826	0.00297491478607783	0.0783556477726718
FAM9C	8.41409041359639	-1.14224399429532	0.384664467696216	-2.96945543511285	0.00298328080942541	0.0785004448372461
FAM50A	6616.93178329971	-0.535288361606206	0.180297990666313	-2.96890919098978	0.00298858901013356	0.0785057574515035
TP53I13	3027.59479035677	-0.419234782304657	0.141221139834002	-2.96864040891786	0.00299120409793795	0.0785057574515035
PKD2	3657.20107313607	0.448771358273931	0.151175298206909	2.9685495156736	0.00299208890674261	0.0785057574515035
SPIC	3.38137938323499	-1.77812127242174	0.599082857550256	-2.96807236263236	0.00299673771587533	0.0785524179431459
TACSTD2	550.229508938988	1.41336846447729	0.476275101537575	2.96754640314908	0.00300186967074368	0.0785916268095766
CASP5	9.24496650117371	-1.04422327656448	0.351906613457825	-2.96733064009217	0.00300397725801422	0.0785916268095766
LEF1	902.873365442539	1.1548306783171	0.389270749468602	2.96665156550698	0.00301061931473351	0.0786901701690517
FHDC1	98.3680950576249	0.947995742456559	0.319594660052471	2.9662439988857	0.00301461217122018	0.0787193479748201
RP11.3P17.5	22.786625289067	-0.731984111262849	0.246808890530937	-2.96579312717707	0.00301903490715567	0.0787596847180382
RP11.334C17.5	165.680868812053	-0.701864750700385	0.236834170428566	-2.96352823340618	0.00304134160475451	0.0792660517673448
PIDD1	1576.51265464122	-0.515450756802132	0.173954972423422	-2.96312746696013	0.00304530432830615	0.0792938137473132
MAL2	37.3135744836349	1.68015523348975	0.567217466831585	2.96210066110078	0.003055478741906	0.0793972596422902
C7	1781.43306026028	1.45615166034968	0.491615682399021	2.96197154094809	0.00305676035960581	0.0793972596422902
FUBP3	2959.7212108182	0.287880286941946	0.0971961521805946	2.96184859671247	0.00305798113217035	0.0793972596422902
ISLR2	98.0429606200962	0.922981152440871	0.311719238572748	2.96093740208937	0.00306704269115772	0.0795570524040021
MPND	1099.2554015331	-0.384447821396216	0.129873962181147	-2.96016087397097	0.0030747843508625	0.0796172109675669
RP11.666F17.1	8.03137846545991	-1.17438337698819	0.396734899236696	-2.96012117725883	0.00307518058878602	0.0796172109675669
SLC39A3	1297.47939465354	-0.406875812879572	0.137515727797357	-2.95875838637995	0.00308881173489555	0.0798838802612547
CRIM1	4250.0238789845	0.707074753417384	0.238997045813037	2.95850834060316	0.00309131876038401	0.0798838802612547
CNGB3	8.2737826239603	1.51984249080941	0.513836774983955	2.95783128962863	0.00309811637006345	0.0799840118709023
WNK4	96.237236959015	1.19363305945906	0.403759183838074	2.95629946571758	0.0031135462515206	0.0803066038822929
ANO4	89.0431300265405	1.62427032282926	0.549664140219969	2.95502326598794	0.00312645472683974	0.0804817616903709
SS18L2	721.618548775849	-0.411334922572513	0.139215321377316	-2.95466704744135	0.00313006649762947	0.0804817616903709
IGHV3.30	42.0965603927392	1.75038588844805	0.592416604495439	2.95465365954565	0.00313020231430705	0.0804817616903709
SCNN1G	5.63133673142947	1.57521864141978	0.533377189988447	2.95329209982508	0.00314404306974168	0.0804817616903709
ADPRHL1	136.883311876882	0.911146698553799	0.308552117248999	2.95297503279977	0.00314727417071353	0.0804817616903709
GNG2	2148.51161511324	-0.934449118545076	0.316465567228819	-2.95276711058245	0.00314939466440054	0.0804817616903709
TNN	303.92533779815	-1.53645356096512	0.520368251576464	-2.95262740628471	0.00315082016939574	0.0804817616903709
TCN1	4.25329515630301	-1.54938116623911	0.524771185645085	-2.95248902497286	0.0031522327548054	0.0804817616903709
PEX12	556.605123467157	0.352459448634103	0.119398522638085	2.95195820556725	0.00315765667296316	0.0804817616903709
RNU4.2	8.63098536476272	-1.08155006593319	0.366420188474335	-2.95166614709862	0.00316064455602292	0.0804817616903709
APOBEC2	9.18396116317898	-1.36176674542028	0.461360355422853	-2.95163364041579	0.0031609772726216	0.0804817616903709
TMC6	791.760014556705	-0.66093565264438	0.223930064813337	-2.9515270903678	0.00316206807127043	0.0804817616903709
KRT17	9702.6062729407	2.06802312295426	0.700724970346129	2.9512622076715	0.00316478127616827	0.0804817616903709
CTD.2318O12.1	13.2676422143111	-1.0096187780019	0.342118500633581	-2.95107916155411	0.00316665746514978	0.0804817616903709
ALX1	17.3008140114842	2.65632682882317	0.900176834274491	2.95089445504791	0.00316855170040784	0.0804817616903709
THAP6	642.28777805013	0.320941305833327	0.108765835225819	2.95075475830246	0.00316998502938268	0.0804817616903709
RP11.74E22.3	44.1139546579866	-0.611055350464955	0.207086805415547	-2.95072083051739	0.00317033322744354	0.0804817616903709
MAPK15	13.0559056281786	1.30096487384426	0.441017114933533	2.94991924302151	0.00317857000196073	0.0806160766206278
RP11.388P9.2	2.47708206590961	1.53077095173473	0.518981426685601	2.94956789014739	0.0031821865000916	0.080629631825362
UBE2C	2907.76827386633	-0.793447554333071	0.269029558962359	-2.94929507892509	0.00318499714986539	0.080629631825362
RP11.490M8.1	53.2160019215266	0.837487945986273	0.284124326562903	2.94761084387774	0.00320239921501152	0.0809952466894689
SNRPCP3	7.09371184630261	0.731414939374018	0.248223508289414	2.9465981865071	0.00321290398752192	0.0811859007594873
FREM3	5.92067253264418	1.15599902843432	0.392393133828401	2.9460225696504	0.00321888912070414	0.0812216509604791
ORC6	549.246292032795	-0.642478824604554	0.218093182764238	-2.94589136836562	0.00322025474282394	0.0812216509604791
ENO4	14.9243513222126	0.829474049259076	0.281598241113175	2.94559385733418	0.00322335337323159	0.0812219374069996
TMEM135	643.411840736104	0.403800683677445	0.137099060593509	2.94532057279875	0.00322620207415803	0.0812219374069996
MGAT3	251.583789043605	1.10259877855558	0.374463413508151	2.9444766532087	0.00323501352556877	0.08136891557051
CCNB1	3168.76431154916	-0.689528393977508	0.234204620017034	-2.94412806172379	0.00323865960042218	0.0813831626345815
TBX2.AS1	230.226896691925	-0.757462049808143	0.257318614201784	-2.9436737492071	0.00324341707875886	0.0813831626345815
AMH	376.568473397176	-1.1617593948289	0.394715073664628	-2.9432861127974	0.00324748137034035	0.0813831626345815
ADAT3	117.642014850658	-0.582894027169635	0.198048013629225	-2.94319552359106	0.00324843184903111	0.0813831626345815
SURF6	2303.10927786024	0.327818330479627	0.11139937475838	2.94273043444499	0.00325331564249799	0.0813831626345815
PLA2R1	567.583857158731	0.898929326731923	0.305475637056419	2.94272019658936	0.00325342322305899	0.0813831626345815
RP11.110G21.1	138.225828726466	-0.42280478537545	0.143727433294131	-2.94171248790201	0.00326402821550002	0.0815723373601648
AC073621.2	3.44770997361675	-1.33979018786267	0.455488529302083	-2.94143562718374	0.00326694737070601	0.0815723373601648
TTC25	97.8306398828351	0.619443475520768	0.210621986412493	2.94102000494677	0.00327133406060321	0.0816074092091771
WDFY3.AS2	150.716515900464	0.679530358774741	0.23111878785666	2.94017792788091	0.00328023822671675	0.0817550084811753
FAM171B	557.742390960137	0.672437532014137	0.228739374215281	2.93975418233532	0.00328472727918851	0.08179239920134
RP11.81A22.5	19.9607776211748	-0.699272754538918	0.237930253099347	-2.93898209845109	0.00329292092954212	0.0819218855980451
REEP4	1747.01634291529	-0.460522764594316	0.156724878561768	-2.93841519496099	0.00329894897582859	0.0819973094210038
MOBP	12.2413647131884	1.18692636722164	0.404026325950688	2.93774511952595	0.00330608703975348	0.0820867846536983
FAM133B	378.025295427496	0.245947367177985	0.0837303032312057	2.93737580883765	0.00331002717958869	0.0820867846536983
CCDC18	371.646778731136	-0.514578808334404	0.17519166382992	-2.93723341102559	0.00331154755016016	0.0820867846536983
WDR13	5221.15143554229	-0.420340961549698	0.143142565312787	-2.93651969022067	0.00331917748060122	0.082201457858944
SLC35A4	5390.80016717993	-0.28390429611688	0.0967043761365038	-2.93579574636967	0.00332693305278086	0.082299467749594
NDUFS5	8952.06827650777	-0.5828486411981	0.198545715447698	-2.93558911550341	0.00332914970396845	0.082299467749594
HCG4P11	12.6718925578986	-0.851969242876908	0.290306817157577	-2.93472007036771	0.00333848719610679	0.0824059202919937
HIST1H4J	6.71284576953261	-1.05529461107539	0.359600817967982	-2.93462794950971	0.00333947838938175	0.0824059202919937
SPNS2	458.501931558662	0.882759083166161	0.300843728267188	2.93427783338118	0.00334324798109009	0.0824106381724434
ARHGAP22	804.013119720249	-0.783197101705736	0.26698349588783	-2.93350380742182	0.00335159543504269	0.0824106381724434
SH3D19	3607.26116382854	0.614182101928881	0.209380383268903	2.93333163470285	0.00335345480378939	0.0824106381724434
CENPT	2015.62304766015	-0.357569604002726	0.121903241746587	-2.93322473528671	0.00335460973011194	0.0824106381724434
NPNT	5900.63280072672	1.01500847350097	0.346039704071758	2.93321391030461	0.00335472670189659	0.0824106381724434
FAM120C	1045.91238396827	-0.44401486975822	0.151400722702611	-2.93271301373096	0.00336014331662799	0.0824696699577055
PTCH2	268.589097633791	0.844735010237015	0.288174996786579	2.93132651915191	0.00337517820295249	0.0827644504498188
FTH1P19	3.19842940891849	-1.43362140931812	0.489160953557058	-2.93077646302955	0.00338115986004302	0.082836903070669
RP11.186B7.4	62.9268845857886	-0.688754889929286	0.235157420188213	-2.92890987398156	0.00340153034949606	0.0832614307194177
RP3.420J14.1	2.60874113989568	-1.48183389300999	0.506201690950575	-2.92735863886056	0.00341854425600836	0.0836031118051159
SAMD4A	2521.0055814943	0.617314787654049	0.211034651412199	2.92518211356812	0.00344254694737795	0.0839712513685289
WDR83OS	5355.79867495465	-0.454837100090938	0.155502378405007	-2.92495269047469	0.00344508593868562	0.0839712513685289
RP11.534C12.1	11.6415654260173	-0.848760008072046	0.29018709778414	-2.924871624387	0.00344598349250416	0.0839712513685289
DNMT1	7140.55875868542	-0.477555154924565	0.163279170599458	-2.92477695208325	0.00344703196211346	0.0839712513685289
RP11.624M8.1	78.2177856490068	-1.18770015946016	0.406146219102751	-2.9243166711831	0.00345213358469784	0.0839712513685289
LINC01537	25.4730974717032	0.897252130111942	0.306831006073116	2.92425508619599	0.00345281669620185	0.0839712513685289
CTB.193M12.5	1212.75536138234	-0.532363296288868	0.18206358927847	-2.92405141741223	0.00345507670251274	0.0839712513685289
TTK	856.764315748128	-0.750492526688143	0.256783864261992	-2.9226623286673	0.00347052663729962	0.0842291557704432
RP11.571F15.3	5.60941866283975	-0.688643991778927	0.235648532807573	-2.9223351555567	0.00347417470873183	0.0842291557704432
ADAMTS16	301.044787705335	1.53844230944609	0.526500049522287	2.92201740691568	0.00347772103496213	0.0842291557704432
RP4.811H24.9	3.18422231269714	-0.993748810828119	0.340092876473545	-2.92199243081006	0.0034779999276694	0.0842291557704432
LINC00094	1347.18480571673	0.395474203970495	0.135379405092231	2.92122870314777	0.00348653783505203	0.0843608323578717
UBE2S	2352.07871929462	-0.702318624759689	0.240441441176973	-2.92095497898284	0.00348960250782397	0.0843608323578717
USP13	2048.03714834713	-0.485750387644186	0.166334433150065	-2.92032370234458	0.00349667976106556	0.0844573153939278
DCST2	197.500812553289	-0.872671699445217	0.298872053327832	-2.91988390927936	0.00350161800554561	0.0845020091179551
AC139100.4	22.7668053249789	-0.62865498301724	0.215348949699838	-2.91923867700997	0.00350887452329707	0.0846025200040067
CTD.2553C6.1	3.61748532673205	-1.24633834407579	0.427020164734723	-2.9186873290868	0.00351508602250664	0.0846776796583773
C19orf52	995.373391611201	-0.29173297375742	0.100028608293232	-2.91649537802435	0.00353987967866535	0.0851289790869726
RP11.693N9.2	257.002081325021	-0.75127964952477	0.257597982393083	-2.91648110961658	0.00354004159179182	0.0851289790869726
CTB.55O6.8	248.57946367137	-0.814192168887505	0.279307300446902	-2.91504077259981	0.00355642076772069	0.0854477706140863
TCEB2	9412.08670889722	-0.566460760047055	0.194355784743086	-2.91455569895099	0.00356195241181454	0.0854787375193847
BAI3	140.361140671594	1.61212138615462	0.553255827953584	2.91388053175623	0.00356966485894291	0.0854787375193847
CDK5R1	301.953387503078	-0.830735569565533	0.28509921935284	-2.91384722641914	0.00357004569928242	0.0854787375193847
GRIN1	7.59769454544279	-1.23634077900752	0.42430766697763	-2.91378373578318	0.00357077180529606	0.0854787375193847
ARHGAP15	470.800518824359	-0.895690815989209	0.30748440180255	-2.91296342428574	0.00358016532625483	0.0854787375193847
RP1.63M2.5	10.681525070821	-1.0207657854992	0.350455329857876	-2.91268443802284	0.00358336516235043	0.0854787375193847
LPPR5	3.36657894981654	1.90586180579883	0.654341855933947	2.91263930087214	0.00358388310783378	0.0854787375193847
TAC3	13.3969397622518	1.13609623156318	0.390065428321443	2.91257863187749	0.00358457938736352	0.0854787375193847
HCN4	125.720399659637	-1.80048175125032	0.61820461314149	-2.91243661560681	0.00358620974590998	0.0854787375193847
MYLK.AS1	33.5609163469809	-0.512538434569902	0.175997081663345	-2.91219848491755	0.00358894501972422	0.0854787375193847
PAM16	472.951137040351	-0.333852816727971	0.1146614291475	-2.9116401148158	0.00359536614736561	0.08555690182936
STX1B	350.685372516014	0.8349706699653	0.286804152284109	2.91129212501141	0.00359937323372268	0.08555690182936
SIRT6	1255.78099214922	-0.352472094855396	0.121082050214075	-2.91101855503949	0.00360252623060498	0.08555690182936
RP11.632P5.1	15.1092640394382	0.980204211773264	0.336744204717554	2.91082726307173	0.00360473243474574	0.08555690182936
MND1	346.112929563468	-0.620740308439736	0.213351120947169	-2.90947760519827	0.00362033323219578	0.0858477830061706
CARD16	298.057646160693	-0.815262085761879	0.280252071901022	-2.9090314309962	0.00362550408303362	0.0858477830061706
LINC00703	4.54320261055046	-1.44865416722622	0.497998261853106	-2.90895426388763	0.0036263990775098	0.0858477830061706
FAM177B	24.8371029573401	-0.95141965562642	0.327257563123078	-2.90725032157194	0.00364621290261153	0.0862422318866614
PABPC1P4	194.16489473273	1.28967293866172	0.443660536842756	2.90689126384665	0.00365040064408472	0.0862667219568415
PROCA1	297.050583142996	-0.608456545887607	0.209412657717175	-2.90553853105368	0.00366621706686062	0.0865657430989714
APLN	2281.13839455303	-0.935992115205616	0.322298860127015	-2.90411239691245	0.00368295916600826	0.0868818652268559
TRBV28	166.625483097441	-1.24819987876241	0.42984193952062	-2.90385782307436	0.00368595503648249	0.0868818652268559
EVA1A	351.092742482613	1.14282638152057	0.393653177232219	2.90313008409027	0.00369453142312572	0.0870090765277611
C21orf33	91.6262994120019	-1.21336483972289	0.418062062045856	-2.90235577412857	0.00370367656538199	0.0871494521824965
C1orf220	40.7475193435396	-0.6841374241126	0.235875507119514	-2.90041739588485	0.00372666048206013	0.0874727606745786
MCM3	8974.36367747979	-0.455754164015776	0.157135160803323	-2.90039582284335	0.00372691700783163	0.0874727606745786
LAPTM5	7846.86120600226	-0.867168584875607	0.298983610745885	-2.90038836146319	0.00372700573509313	0.0874727606745786
RPL37P6	22.7784675367048	-0.738914765962346	0.254826246766018	-2.89968076420644	0.00373542888329916	0.0875301878454873
DNAH5	23.0051758204526	1.16260131270892	0.400953894602578	2.89958852715792	0.00373652813534301	0.0875301878454873
FJX1	456.443793189897	0.936138835706227	0.32289347896217	2.89921877244199	0.0037409377080071	0.0875301878454873
CTD.3131K8.2	68.8912282279423	-0.391391458376085	0.135004046186529	-2.89910909659195	0.00374224657528394	0.0875301878454873
TMEM151A	29.3353475734256	-1.32400168031308	0.457095618086226	-2.89655299225232	0.00377286916358189	0.0881621577809422
GCOM1	13.7837618958031	1.12981699058127	0.390126199225472	2.89602952281679	0.00377916844679499	0.0881621577809422
CYP4F22	13.7169006513451	1.05280340439902	0.363569686545692	2.89574033083396	0.00378265259879624	0.0881621577809422
GALNTL6	45.793198341835	1.30470456911453	0.450584195650101	2.89558440289301	0.00378453241191488	0.0881621577809422
VIPR1.AS1	5.67952078659437	-1.03881338187993	0.358766405606352	-2.89551464587166	0.00378537365316842	0.0881621577809422
RP5.967N21.11	70.9258175834383	-0.558252385888287	0.192854809670793	-2.89467702071437	0.00379548835118586	0.0883225631110138
CENPH	912.911541454599	-0.50154471401547	0.173295659404	-2.89415623992193	0.00380178938756908	0.0883940258115679
NR2F6	1839.42688065774	-0.446624027792125	0.154346126427297	-2.89365232630248	0.00380789539180998	0.0884608364110968
TMEFF2	366.88669891057	1.49861536859272	0.518001423738968	2.89307191045077	0.00381493942856921	0.0885493065328457
CABP4	36.4193191433057	-0.859950764559932	0.297333071953442	-2.89221363405746	0.00382537733421712	0.0886815849134356
VAMP8	1196.59938528408	-0.866986889456603	0.29979754372148	-2.89190791456937	0.00382910159688531	0.0886815849134356
CCDC22	1642.44289618312	-0.329347659786326	0.113898252279512	-2.89159537740834	0.00383291231732731	0.0886815849134356
TUBBP5	13.3772445226892	-1.7025135732185	0.58879150503814	-2.89153895504695	0.00383360063409319	0.0886815849134356
C11orf70	192.423671255834	0.73784065834395	0.255208773081599	2.89112576121369	0.00383864475864021	0.0887106373824899
ARHGEF28	505.7348975844	0.701968915838323	0.242819763468995	2.89090519572949	0.00384133981211177	0.0887106373824899
BMS1P8	1.61662220119266	1.97959985904901	0.684935237826519	2.89020005063662	0.00384996740164131	0.088834913923538
TMEM132B	37.1345739783334	-1.04107936174611	0.360317579987495	-2.88933823817934	0.00386053575180365	0.0890037248389711
ITIH1	27.416821589005	-1.69901318880253	0.5881018252343	-2.88897792168157	0.00386496209724763	0.0890307683108407
LMNB1	3430.241685588	-0.637167761974851	0.220612127014795	-2.8881810378997	0.00387476787702289	0.089114677117446
CDC7	848.98906811357	-0.559127178393351	0.193593360378579	-2.88815265823145	0.00387511750967481	0.089114677117446
CTA.246H3.11	8.54339439911904	0.838188798565393	0.290307786669399	2.88724187587816	0.00388635342200889	0.0892980249762345
KB.1517D11.4	13.2280723789602	1.91727016181435	0.664123234395984	2.8869192681658	0.00389034038041833	0.0893146433309799
CTD.2135J3.3	7.72489827567656	0.498164197864821	0.17258702964757	2.88645212147224	0.0038961202140048	0.0893723602484956
OIP5	243.522543185036	-0.624926888374143	0.216604767282545	-2.88510218964374	0.0039128662852918	0.0896813222473161
PTGIS	7412.59197350372	1.24373993275703	0.431169898148948	2.88457041666526	0.00391948092381937	0.0897419194316502
GPR155	958.778845569506	0.772100343091593	0.267684911158962	2.88436258789756	0.00392206883140589	0.0897419194316502
FAM175A	422.109034256611	0.375485445493276	0.130212464801297	2.88363672453527	0.00393111954486959	0.0898738658854647
ORMDL3	3464.162628856	0.278694464550458	0.0967237659732966	2.88134422544506	0.00395982916853483	0.0903754846568186
ITGB3BP	883.019741378717	-0.365969933985633	0.127019895607148	-2.88120165928587	0.00396162083815955	0.0903754846568186
PAEP	11.335795630529	-1.88895403909788	0.655637653159094	-2.88109450394777	0.00396296797442747	0.0903754846568186
THSD7B	56.8280341729933	1.34064769172748	0.465482568098368	2.88012437759897	0.00397518315976959	0.0905785698170314
RP11.1348G14.8	24.8916794685951	-0.523262664921719	0.181733898023315	-2.87927937832813	0.00398585067512773	0.0907460811776585
RP11.690D19.3	177.59423626384	0.608779123273592	0.211501573486378	2.87836687566205	0.00399739955682022	0.0907963945915884
RP11.728E14.3	2.59931963945496	1.60984393525066	0.559317524263064	2.87822902987302	0.00399914680955779	0.0907963945915884
FOXN4	19.8476442729592	-1.43820992721571	0.499696390211921	-2.87816753410159	0.00399992651769571	0.0907963945915884
MTHFD1	5070.61398514798	-0.396909756500827	0.137908942221015	-2.87805670980155	0.00400133201335437	0.0907963945915884
NTRK1	142.573759836272	1.22621301991421	0.426155559353171	2.87738360559084	0.00400987808990363	0.0909149327326452
PLIN2	6515.80776011876	0.946254122800711	0.328921885970093	2.87683539211723	0.00401685073022832	0.0909976300359505
FAM101A	277.695749721019	1.42845875055913	0.496642820487808	2.87622953887883	0.00402456928408289	0.0910900025111954
NDUFA13	2356.03511430594	-0.615382056062605	0.21397202263546	-2.87599307836155	0.00402758543588929	0.0910900025111954
BTBD17	1.02688208384335	1.83449706274364	0.638170839991675	2.87461749704448	0.00404517227190253	0.0914122084169154
RP11.186B7.7	7.49692034429116	-0.802748415236903	0.279344039482589	-2.8736908678051	0.00405705851040995	0.0916051676533652
ANKRD9	1487.33041443694	-0.598258267844599	0.208258603560082	-2.87267012079049	0.00407018872315838	0.0916964947909069
CCDC130	1960.97754733811	-0.285068215011408	0.09923907617103	-2.87253999140537	0.00407186539029201	0.0916964947909069
C9orf92	11.6624796010858	-1.19385234649621	0.415617425453572	-2.87247904775248	0.00407265084136777	0.0916964947909069
ZMYND10	344.321455427209	-0.818790707163584	0.285060994084654	-2.87233512881256	0.00407450623641536	0.0916964947909069
PLA1A	343.931842362839	-1.10228563966499	0.383863471195533	-2.87155648395496	0.00408455779313243	0.0918471721995579
PDCD1	104.205077293679	-1.23447793960651	0.430098518876951	-2.87022132238426	0.00410184583823949	0.0920653201945155
EPB41L3	2459.12786292483	-0.795882766989874	0.277305425876556	-2.87005840031477	0.00410395993832121	0.0920653201945155
RP1.40E16.12	27.9106693804504	-0.613799048117371	0.213876098174587	-2.86988145639503	0.00410625710803667	0.0920653201945155
ZWINT	1894.97353395742	-0.626175731290677	0.218197249697784	-2.86976912934498	0.00410771599640077	0.0920653201945155
LINC01337	2.96307482420676	-0.897030600302265	0.312719975640266	-2.86847873553864	0.0041245092260186	0.0923033364235059
ITPRIPL1	385.268275889735	-0.717059298579423	0.249982773589112	-2.86843484566672	0.00412508150427347	0.0923033364235059
CAPN8	14.7672809367574	1.10094834795	0.384005508499909	2.86701186201932	0.00414367481255415	0.0926217448618681
CTC.479C5.12	77.8695839676006	-0.487352648383148	0.169997159996073	-2.86682817756724	0.00414608044492394	0.0926217448618681
MRO	168.283995795067	-0.977615916333108	0.341106136143476	-2.86601679871835	0.00415672187614424	0.0927837282728901
TACC3	4389.51399451923	-0.582744138440237	0.203375478184838	-2.8653608765488	0.00416534256208924	0.0927887704899584
PODN	3003.99072877001	1.09758606567089	0.383059705887368	2.86531328876865	0.0041659686317456	0.0927887704899584
CORIN	80.8283230625926	1.09892216351404	0.383537716290567	2.86522580919134	0.00416711974465245	0.0927887704899584
PIGU	1519.60048442613	-0.427057182292718	0.149089473362539	-2.8644355141979	0.00417753204423986	0.0929449934330634
PTPN6	1000.37865375136	-0.809823005946008	0.282791897358671	-2.86367117838207	0.00418762477340124	0.0930179978417437
LAGE3	1282.78860472492	-0.587938976005272	0.20531324007406	-2.86361939343605	0.00418830937102492	0.0930179978417437
RP11.20J15.3	29.6381603805434	1.34432773138385	0.469484046049459	2.86341515264659	0.0041910104267657	0.0930179978417437
ADAMTS6	657.686319357077	0.796713239099847	0.278277996761925	2.86301198215631	0.00419634693876071	0.0930609646078813
KCNT2	242.012418107141	1.16769099226502	0.408118916774835	2.86115380657362	0.00422102219206006	0.0934455554819177
TMEM233	106.865714891429	-0.944133293382153	0.330002006302078	-2.86099258595995	0.00422316927991137	0.0934455554819177
GABRG1	3.07160503809442	1.97112260975774	0.688980944270293	2.86092471228704	0.00422407349743757	0.0934455554819177
RP11.274B21.9	24.201648921175	-0.709104051606504	0.247879625665571	-2.86067904815702	0.00422734771930915	0.0934455554819177
PBK	983.418985595151	-0.699830134170425	0.244700013852422	-2.85995134676409	0.00423706006745745	0.0935846535964814
AC107079.1	8.3816392770885	1.16082510533201	0.406003994549067	2.85914700573647	0.0042478188396323	0.0936719665676694
ERC2	42.6493336472859	1.32810828332166	0.464512553967113	2.85914400370692	0.00424785904079799	0.0936719665676694
UBE2SP1	54.8059699950965	-0.943724441329432	0.330295488869166	-2.85721262667094	0.00427379438393984	0.0941680008944425
ROMO1	3729.19843618772	-0.582982901764235	0.204095205466238	-2.85642624691972	0.00428439529561434	0.0942491898338256
EEF1A1P6	515.428106266095	0.478015267593529	0.167350017708857	2.85638014347357	0.00428501753944167	0.0942491898338256
GS1.259H13.10	4.70518667656748	1.04444996169511	0.365681587829949	2.85617322953871	0.00428781120160465	0.0942491898338256
HOXA6	48.8438722757905	0.850333480542901	0.297852537543349	2.85488076602049	0.00430529889340895	0.0945576320361392
CDK5RAP2	4797.26803462574	-0.396123385839031	0.138779387060528	-2.85433877630734	0.00431265151761148	0.0945911413280937
PTRF	42040.6970977356	0.409348344777825	0.143416689108067	2.85425878482924	0.00431373764442962	0.0945911413280937
LINC00840	12.449070561523	1.18466154598121	0.415148042668245	2.85358817632172	0.00432285294775455	0.0947151271162938
FAAH2	24.0778068839102	-0.726957926962839	0.254798049931278	-2.85307492407775	0.00432984116643873	0.0947923466886099
RP6.91H8.3	1.8578241318661	-1.58868159997565	0.55694349440561	-2.85250050666478	0.00433767432799575	0.0948850775612258
SERPINA1	1196.74711687793	-0.936673982422823	0.328397575621067	-2.8522560821327	0.0043410113683642	0.0948850775612258
CLUH	4112.46963970446	-0.35296619226379	0.123782268251985	-2.85150851772446	0.00435123204667566	0.0949312480893437
IGFN1	3768.22662953133	-1.67342349152348	0.58687364342671	-2.85142042118724	0.00435243793569041	0.0949312480893437
RRAGA	5158.44491717233	0.309358608509186	0.10849584446128	2.85134062088055	0.00435353052518185	0.0949312480893437
GPS2	218.123990052469	-0.438944573276231	0.153966990886544	-2.85090051282279	0.00435956075271842	0.094987053788927
UQCR10	3583.70909021639	-0.475563317347819	0.166871529400861	-2.84987690264056	0.00437361524552708	0.0952174660374654
UNC93B3	2.66135638003349	-0.88048985407547	0.309067694594023	-2.84885761105521	0.00438765124210836	0.0953695907332933
PIM2	988.421750732944	-0.577168759494652	0.202611506430224	-2.84864749126881	0.00439054973494706	0.0953695907332933
FANCG	1316.32356289644	-0.402087483158256	0.141156491762338	-2.84852278586834	0.00439227080146206	0.0953695907332933
AC016629.3	1.23949155944929	1.35812245618036	0.476808863784744	2.84835824023919	0.00439454264103935	0.0953695907332933
RASSF10	4.98958304051686	1.56519774849466	0.549890480986888	2.84638087512554	0.00442192704336296	0.095887841100373
GMIP	796.218050612763	-0.485045667306414	0.170425654368192	-2.84608364336104	0.00442605673121314	0.0959014002425802
NXPE2	14.3212318208428	1.52678430278204	0.536571865125066	2.84544233869991	0.00443497881834691	0.0960186948915201
RP11.44M6.7	222.332959226428	-0.51092069242597	0.179590009379641	-2.84492825737271	0.00444214268959852	0.0960651950658256
PROSER2	105.794700870875	1.03737621192557	0.364681416710837	2.84460947114322	0.00444659033344394	0.0960651950658256
VCAM1	2279.11232498184	-1.01527133060019	0.356924355494609	-2.84450000391056	0.00444811852963977	0.0960651950658256
GREM2	999.700417860486	1.62753183186669	0.572231984975478	2.84418186085218	0.00445256260646115	0.0960651950658256
ODF3L1	26.3423104199007	0.823450790601551	0.289536555350838	2.84403048728599	0.00445467852585444	0.0960651950658256
TRMT44	592.549537102907	0.347888263145686	0.122345526962359	2.84348984211509	0.00446224317512335	0.0961525564806501
VAV1	426.335101360814	-0.825448318129771	0.29042519901485	-2.84220625803054	0.00448024959088697	0.0963139803542757
KIAA1045	38.4827723008482	0.924438130048259	0.325285548334676	2.84192806837251	0.00448416077000911	0.0963139803542757
UBL5	6719.39867555581	-0.444197567269628	0.156308275902052	-2.84180453470024	0.00448589857076925	0.0963139803542757
RP11.288L9.1	3.04578804195132	-1.02631588349266	0.361169302154179	-2.84164760784276	0.00448810700758796	0.0963139803542757
TUBBP1	75.4761929175657	-0.466389643092263	0.164152715923338	-2.84119358287118	0.00449450206497204	0.0963139803542757
FH	3589.68432134084	-0.361554128102585	0.127262789921601	-2.8410042583957	0.00449717118666417	0.0963139803542757
CCKBR	134.205149982932	1.61625088802299	0.568906363363111	2.84097874818706	0.00449753094275498	0.0963139803542757
SLX1A.SULT1A3	4.15980306186071	-0.699460861935787	0.246244450130951	-2.84051421895527	0.00450408649857541	0.0963139803542757
RP11.386M24.4	26.7726885304322	-0.570479828042058	0.200850361310809	-2.84032263780328	0.00450679266146346	0.0963139803542757
DEPDC1.AS1	9.452656102609	-1.05059732363856	0.369895764598788	-2.840252374282	0.00450778553185432	0.0963139803542757
TCF19	4355.83481826366	-0.620548344729409	0.218487132853355	-2.84020544654184	0.00450844876247267	0.0963139803542757
EEF1A1	180179.71721441	0.385430518322277	0.135728610252733	2.83971461583957	0.00451539098168997	0.0963586647129274
KCNJ6	17.1502781006866	1.68256392076212	0.592543928706151	2.83955980181264	0.0045175826509788	0.0963586647129274
SHISA2	731.843339137149	1.74796878015472	0.615807750951594	2.83849753020098	0.00453264701596444	0.0965386475234116
HMGB3P22	29.604109087181	-0.743121350358869	0.261803736878261	-2.83846731608885	0.00453307615536008	0.0965386475234116
RP11.320G24.1	31.2030401523315	1.12555321367475	0.396661560977556	2.83756563378834	0.00454589994961732	0.0967364681347026
KNTC1	1869.74933789513	-0.514160457533683	0.181232264095936	-2.8370249640622	0.00455360514657891	0.09674557534901
CWC22	1474.74886074011	0.299257569377215	0.105490937493831	2.83680832199177	0.00455669587620528	0.09674557534901
RP11.361L15.5	14.3442864091659	1.26258541058865	0.445133590480266	2.83641908314853	0.00456225373647799	0.09674557534901
NPM1P25	28.7165066915225	-0.830953428818651	0.292975800751499	-2.83625277817215	0.00456463024216367	0.09674557534901
PTGER3	2634.58840860473	1.09730419620565	0.386910774315813	2.83606523531439	0.00456731158330684	0.09674557534901
RP11.383C5.5	4.24993432662295	-0.666697858416632	0.235087899407422	-2.83595140412227	0.00456893974834387	0.09674557534901
SPARCL1	49042.1597429386	0.83664913606865	0.29503085084697	2.83580220057262	0.00457107465198677	0.09674557534901
AC073254.1	31.8406322192676	0.525319683286936	0.185271939511498	2.83539798132429	0.00457686303037961	0.0967932254168226
KIF15	816.831125413035	-0.625579082129811	0.22068418693731	-2.83472545455883	0.00458650825773402	0.0969105074327959
FEZF1.AS1	67.2836817550826	1.72870254788618	0.609875371542387	2.83451772042255	0.00458949125312079	0.0969105074327959
LINGO4	3.84380903475925	1.806422392195	0.637454418697991	2.83380636984937	0.00459971933359514	0.0969846849319587
EMCN	963.556473503461	0.735983224167	0.259717798183603	2.83378046985717	0.0046000921231339	0.0969846849319587
NSMCE4A	1341.35802975775	-0.304839222813874	0.107604554013657	-2.8329583780923	0.00461193906452512	0.0970121364065488
C14orf132	5519.28652550667	0.878939123962355	0.310256851291785	2.83294025676727	0.00461220051697531	0.0970121364065488
HTRA3	5558.4314355508	-1.2836735486209	0.453141962120413	-2.83282868488748	0.00461381055932611	0.0970121364065488
RP11.346C4.3	5.58764178262021	1.50544660651207	0.531494926257392	2.8324759694564	0.00461890378148814	0.0970121364065488
RP11.631N16.4	87.8228123344037	-0.5421150830025	0.191397793570139	-2.83239985629112	0.00462000352571705	0.0970121364065488
LRRC18	4.03758791709019	1.6531730833184	0.583740347196442	2.83203498140599	0.00462527882517406	0.0970121364065488
CCDC77	522.800558303168	-0.400446539727799	0.141409461028407	-2.83182282723894	0.00462834862149489	0.0970121364065488
APTR	403.677091991889	0.330229329328698	0.116617695302732	2.83172573828906	0.00462975407976879	0.0970121364065488
FGD1	2893.09437738952	-0.463606995251084	0.163755515407428	-2.83109240075131	0.00463893175215853	0.0971300737028082
PLCD4	504.496769703128	-0.564308354597162	0.199408204545415	-2.82991542842281	0.00465603098233559	0.0974135656441863
LINC00158	4.03024427458742	-1.16740016223724	0.412660932223981	-2.82895731356418	0.00466999273294851	0.0975467152216556
B3GALT2	68.4935486026738	1.4384939022828	0.508508776010381	2.82884774097475	0.00467159184921507	0.0975467152216556
USP30.AS1	27.5831028520171	-0.991584504476855	0.350538641909178	-2.82874521073133	0.00467308863756451	0.0975467152216556
ITIH4	49.6592168177235	-0.827214527687845	0.292506017309185	-2.82802567720671	0.00468360497304329	0.0976323593053389
RP11.383C5.3	6.91177599317102	-0.956936664772878	0.338432850088887	-2.82755253965904	0.00469053178198097	0.0976323593053389
C6orf52	27.0091135853144	-0.771516754709199	0.272872376631411	-2.82739046082097	0.00469290677377958	0.0976323593053389
SEPT1	458.401753706542	-0.665865206184634	0.235515517317858	-2.82726681353214	0.0046947193480942	0.0976323593053389
AHCYL2	993.420995282836	0.596558994024342	0.211005814498047	2.82721590134126	0.00469546586590957	0.0976323593053389
CTD.3216D2.5	5.7311093348065	-0.606329069186714	0.214477733390526	-2.82700241000168	0.00469859742765225	0.0976323593053389
SEPT7P2	1087.71065991337	-0.526786644425412	0.186370695881355	-2.82655297247357	0.00470519610687838	0.0976491744886163
CCDC13	131.647300289726	-0.978378476611252	0.346151895664129	-2.82644263650248	0.00470681735082857	0.0976491744886163
FAM86C2P	177.072283693005	0.552298695827067	0.195419669313312	2.82621855705619	0.004710111464042	0.0976491744886163
PRELP	10142.5803085446	1.15909604189803	0.41018855268211	2.82576399150833	0.00471680028413126	0.0977138202691417
PALLD	38121.1550588914	0.657385333111963	0.232697131728764	2.82506848377583	0.00472705115289411	0.0978263081535811
CHRM2	453.364055154495	2.01066777372281	0.711827044195186	2.82465774533213	0.00473311436378843	0.0978263081535811
CYP4B1	55.2976411697086	-1.82587025390599	0.646451309331139	-2.82445131992253	0.00473616421754382	0.0978263081535811
RP1.309I22.2	89.7529282858451	0.901264818798212	0.319134346054866	2.82409220423823	0.00474147424905095	0.0978263081535811
IFI27L1	772.236529139586	-0.559392720831771	0.198089083359335	-2.82394522376091	0.0047436491161868	0.0978263081535811
E2F1	3598.86443534402	-0.583231548579402	0.206551599596263	-2.82366028498167	0.00474786792164277	0.0978263081535811
GSTM3	2904.82884216179	0.659500145602534	0.233570982833352	2.82355341233921	0.00474945115423421	0.0978263081535811
COX7B	5261.04942630196	-0.421826336433792	0.149401336645866	-2.82344419336536	0.00475106963952709	0.0978263081535811
MYL4	81.5735842276024	-1.01240802996138	0.358600554771688	-2.82321936341107	0.00475440290302795	0.0978263081535811
CCNG2	2089.82189705357	0.450469693295501	0.159630465808545	2.82195313415785	0.00477321520879685	0.0981395998526932
PTPN21	1225.93856484801	0.599978613098661	0.212660298093518	2.82130053647728	0.00478293710422165	0.098265658253851
PLA2G4B	32.9144986680863	-0.813988017083088	0.288556168783632	-2.82089972470295	0.00478891696715538	0.0983147049686227
HORMAD1	5.14449959221961	1.19970268770217	0.425390626089755	2.8202377159318	0.00479880854454864	0.0984439240105834
CYSLTR2	112.526085410087	-1.08951663826855	0.386375441842711	-2.81983925549822	0.0048047711549251	0.0984924100566894
ATP5E	11830.1990470439	-0.575430660896636	0.204165414928943	-2.81845316993041	0.00482556496675517	0.0987636026553111
GRB7	49.2642435224444	1.18534767851911	0.42058541197627	2.81832808453659	0.00482744547567574	0.0987636026553111
DRAXIN	409.978284013812	-1.25556107016016	0.44551307817265	-2.81823616785857	0.00482882775534628	0.0987636026553111
ARHGEF39	566.124094239937	-0.58384620933395	0.207217057771237	-2.81755862964961	0.00483902789950399	0.0988768865431964
KLK10	10.4868713740796	1.70632204519782	0.605639608418233	2.81738846251202	0.00484159277818765	0.0988768865431964
LINC01573	182.502823907625	1.02321823626852	0.363463649785409	2.8151872597786	0.00487488189680312	0.0994103390438852
LST1	450.293661260895	-0.837837857594689	0.297615835444665	-2.81516558533548	0.00487521070960963	0.0994103390438852
RP6.191P20.5	3.78097814960978	1.36231414709529	0.483961285684542	2.81492381186721	0.0048788799018611	0.0994103390438852
TIGIT	170.311781269234	-1.2291158566019	0.436677040135899	-2.81470227108663	0.00488224423280646	0.0994103390438852
ANKRD32	554.605911295507	-0.418451976287044	0.148684406310225	-2.81436356825448	0.00488739185050114	0.0994377153381675
AASDHPPT	1397.24694761689	0.337859225930534	0.120057896246216	2.81413581691993	0.00489085598352603	0.0994377153381675
LPAR2	374.633825485588	-0.630454000719029	0.224099607812707	-2.81327578781815	0.00490395719778373	0.0995941662885146
RP11.726G1.1	80.5135932302985	-0.768358870221884	0.273142099690709	-2.8130371374165	0.00490759829019137	0.0995941662885146
COPE	7432.41322470899	-0.424560834691438	0.150932714885478	-2.81291458259118	0.00490946906099562	0.0995941662885146
MIR4786	10.0870000167429	1.24174334082631	0.441724132681865	2.81112859577592	0.00493680502602485	0.100074523216441
POLE	3058.10080539108	-0.439566236856317	0.156418700916999	-2.81018979367157	0.00495122927939751	0.100227185407335
GRM2	173.311918720359	-0.906035898713718	0.322414147123456	-2.81016173389807	0.00495166099067154	0.100227185407335
RP3.425C14.4	533.526438002133	0.563685001827632	0.200627935881233	2.80960375409196	0.00496025281413782	0.100326887296153
ANO8	1045.23127921152	-0.488222916787517	0.173786245627495	-2.80933001932735	0.00496447273426359	0.100338080388373
AC006378.2	14.9888836570926	0.539310955529138	0.192053674065056	2.808126208231	0.00498306935664057	0.100524930401115
SPATA32	2.89432503280896	-0.779732969173439	0.277700272289578	-2.80782212687337	0.00498777679788604	0.100524930401115
SMCR5	7.12951705138294	-0.914448196276769	0.325686846198126	-2.8077529287765	0.00498884860552839	0.100524930401115
JAKMIP2.AS1	1.7746881222156	1.25618671802646	0.447402577702749	2.80773241065467	0.00498916645024912	0.100524930401115
GPT2	919.806767592301	-0.648109202889624	0.230861372193893	-2.80735229428204	0.00499505811800481	0.100524930401115
RP11.277B15.3	16.9946646965902	-0.825173049606214	0.293937569017705	-2.80730718554902	0.00499575770465234	0.100524930401115
RP11.15I11.2	3.32512931025213	-0.906793882692801	0.32304137186804	-2.80705185669909	0.00499971924353316	0.10053072506872
ANKRD36BP2	99.8801416080453	-1.211082867215	0.432047889686001	-2.80312182081293	0.00506105486760576	0.101689300665858
MAP2	360.648516980841	0.796675056145232	0.284236797799743	2.80285685144302	0.00506521458980179	0.10169821163941
DGCR9	11.1608668877084	0.976922989329431	0.348580425668589	2.80257558196407	0.0050696335869635	0.10171231139358
RP11.73M7.6	32.0374592615576	0.862585558608853	0.307933763197144	2.80120487488283	0.0050912185466418	0.102051621376756
AUH	409.648214502109	0.348805100328438	0.124527514259982	2.80102837032643	0.00509400404884342	0.102051621376756
CLEC2D	489.393930078916	-0.492870455566291	0.176048478553207	-2.79962916815171	0.00511613431266665	0.102373432845382
GPKOW	1967.21094135911	-0.295175982188804	0.10543731977184	-2.79953988613849	0.00511754937266981	0.102373432845382
TEX41	59.7679828759814	-0.984826204223427	0.351814862037909	-2.79927402304371	0.0051217652196425	0.102382926954519
HSPD1P6	12.5477610224153	1.02618154620414	0.366696977901725	2.79844560507712	0.00513492175382173	0.102570999062106
STPG2	4.87054110895936	1.14158416964455	0.407971984129167	2.79819255746521	0.00513894661928762	0.102576523109719
CTD.2116N20.1	24.5855159256462	-0.804053182001834	0.28737188889405	-2.79795349884859	0.00514275160070608	0.102577653283471
APOD	1632.50775949163	1.18661584384314	0.424194038114095	2.79734210579352	0.0051524944361741	0.102673680478913
RP11.103J8.2	3.62995104429639	-1.62589393483608	0.581278374613013	-2.79710033238123	0.00515635180910677	0.102673680478913
RP5.1074L1.4	301.013899134342	-0.562944489842799	0.201271160242261	-2.79694561886168	0.00515882155442904	0.102673680478913
ARPC5	14101.0732322086	-0.390035181819112	0.139494164036816	-2.79606809727303	0.00517284997229835	0.102817566817631
METRN	1329.82963859252	-0.701622634740614	0.250940307504508	-2.79597423673361	0.00517435250405657	0.102817566817631
CBLN4	50.2536918509043	1.31844276792847	0.471603557184162	2.79565908238816	0.00517940042156163	0.102817566817631
RPS23P6	3.39234829430532	-1.19937080213764	0.429027902904161	-2.7955543078175	0.00518107961125168	0.102817566817631
FOXC2.AS1	4.52817752097241	-1.60664561558578	0.574843832677474	-2.79492537669307	0.00519116963938272	0.102943150979237
RSPH1	28.616530768069	1.12658244063656	0.403152595185484	2.79443182083012	0.00519910025394648	0.103025762164735
RP11.108B14.4	2.35746601042439	-1.16115984263001	0.415572813998556	-2.79411887283378	0.00520413447269014	0.103042096130247
KRTAP5.10	2.93216596893495	1.36421112229244	0.488279814478846	2.79391259241077	0.00520745519798773	0.103042096130247
RP11.815N9.2	7.17526981063486	-0.783710562869699	0.280547468452195	-2.79350431209912	0.00521403338523717	0.103097715043642
RFC4	1984.45699464646	-0.443913984414079	0.158950186124919	-2.79278681728128	0.00522561181015646	0.103252052560824
PNPLA6	4529.88071682991	-0.330662953773834	0.118435436385449	-2.7919258278214	0.00523953650963159	0.103383523013713
CEP152	496.641285880011	-0.505805838431985	0.18116850324526	-2.79190824768941	0.00523982118029746	0.103383523013713
ZNF266	1900.56122201895	-0.359771091184474	0.128966150578246	-2.78965518914355	0.00527642024586333	0.103951347474237
CTD.2623N2.11	11.3919430436502	-0.784387563056178	0.281187543392658	-2.78955302781972	0.00527808523113806	0.103951347474237
SUV420H1	2000.14063057404	0.33866929832023	0.121411396666377	2.78943581590492	0.00527999608964369	0.103951347474237
CD8B	114.682610364514	-1.23256684946992	0.442077653815451	-2.78812294363212	0.00530144205452479	0.104204860608315
DUSP11	1040.00057761689	0.321153228744792	0.115187804035559	2.78808361209534	0.00530208575314944	0.104204860608315
SP140	113.231918387696	-0.943660327431461	0.338478383185547	-2.78794857902097	0.00530429623720611	0.104204860608315
HMGB3	2041.10005690457	-0.853904033837464	0.306352870309559	-2.78732179977496	0.00531456748158011	0.104331745839972
WNT4	53.2234972255901	1.12982798586503	0.405461773457452	2.78652159050844	0.0053277068879812	0.104374422690722
ZNF41	540.293170307779	-0.35043316873721	0.125763741736265	-2.78644038336656	0.00532904194459919	0.104374422690722
CTC.260F20.3	76.4352282457722	-0.383444505297967	0.137615761101988	-2.78634149335404	0.00533066811803139	0.104374422690722
C12orf50	3.10600994158342	-1.07788304208217	0.386880100699925	-2.78609067804757	0.00533479460100718	0.104374422690722
NEIL3	338.728903015624	-0.613355917668225	0.220154183784804	-2.78602889631099	0.00533581149398234	0.104374422690722
RP11.972P1.11	11.5290172717055	-0.656506451737212	0.23573028583218	-2.78498984303013	0.00535293998122172	0.104634682518653
C2	1978.12136197715	-0.975508652207629	0.350463941030668	-2.78347795022446	0.00537795178221867	0.105048557082224
C11orf88	8.32623221500648	0.983098063426801	0.35323737750922	2.78310882715445	0.00538407432656745	0.105093136962086
WNT7B	120.32125665389	-1.83764442333092	0.6604197133218	-2.78254023352495	0.00539351774984914	0.105126131227251
RNF8	1133.21623931138	-0.489022856216272	0.175752826682278	-2.78244660667858	0.00539507417402618	0.105126131227251
RP11.247I13.3	5.95041854718621	-0.77091919508956	0.27709221245243	-2.78217560957945	0.00539958143313905	0.105126131227251
LAMC3	536.454352970374	0.997123806015995	0.358409141891356	2.78208251261139	0.005401130618487	0.105126131227251
CTC.524C5.2	155.967412264988	-0.479634324977905	0.17241663775634	-2.78183318744289	0.00540528150474362	0.105132149011239
LKAAEAR1	19.0904393072873	-1.06983132953096	0.384627055295856	-2.7814770562826	0.00541121554416565	0.105143312866658
INSM1	35.0543789778734	1.70800930840847	0.614096349554072	2.78133766736888	0.00541353971457728	0.105143312866658
COL9A3	48.5705001505233	1.13402617731518	0.407891414597866	2.78021585336186	0.0054322776782363	0.105432419108237
NCBP2	3759.2005984631	0.275228141081441	0.0990590279000794	2.77842562072246	0.00546230172208278	0.105940006326377
HEY2	1660.10418697082	-0.892869273789302	0.32139953080735	-2.77806651287396	0.00546834233713512	0.105952547545897
ZNF827	1163.80302054117	0.596202467582866	0.214621363411241	2.77792694122658	0.00547069172266143	0.105952547545897
CTD.2006C1.6	18.9732944231932	-0.777953353339349	0.280144938497495	-2.77696737093219	0.00548686868458788	0.106190699025765
NDUFA1	3808.43447975808	-0.488405869268233	0.175992836358678	-2.77514630352822	0.00551768800828876	0.106646723540991
RP1.90L14.1	10.7615801282132	-1.26730736600805	0.456698767703378	-2.77493055735845	0.00552134957856209	0.106646723540991
CHODL	92.5211477245933	-1.38315377490456	0.498488264131925	-2.77469676706071	0.00552531986317363	0.106646723540991
ARHGAP4	1881.94314056917	-0.643248468977715	0.231830024131232	-2.77465557530025	0.00552601965874172	0.106646723540991
LTA	27.9673814493291	-0.970773245474577	0.349919900146667	-2.77427275518678	0.00553252711207977	0.106697066208016
PHLPP1	1446.82117968991	-0.579304707296192	0.208905207706025	-2.77305057953079	0.00555334884754752	0.106999480447545
AC073043.1	5.95423158546186	-0.904108643128396	0.32605240813204	-2.77289362255611	0.00555602798055842	0.106999480447545
RP4.568B10.1	4.48217428627655	0.962876888095028	0.347379556794584	2.77182945645937	0.00557422324698213	0.107257895772097
ORC1	433.591751349445	-0.63421908460073	0.228836474777401	-2.77149473316114	0.00557995750009945	0.107257895772097
GPR146	105.394111257543	0.610477526209989	0.22027769378892	2.77139966244143	0.00558158715764417	0.107257895772097
HINT1	9345.58899328752	-0.32686127208687	0.117949642066394	-2.77119342085735	0.00558512393025063	0.107257895772097
ZNF655	2529.93950816091	0.294397685340974	0.106244934265068	2.77093385559906	0.00558957800775872	0.107268156914674
TAF4B	232.682494034603	0.790237725147029	0.285278627291867	2.77005583155215	0.00560466845641232	0.107482380503279
STEAP4	772.642618592986	0.911346373246785	0.329044585222528	2.76967442764771	0.00561123502361362	0.107513056692252
AC009133.12	203.254897650356	-0.390575628509436	0.141027148556446	-2.7695066695127	0.00561412548466083	0.107513056692252
CDCP1	822.781903965654	1.10121785028272	0.397762657498139	2.76853000030018	0.00563098011914998	0.107658631559407
LINC01016	64.0555910970268	-1.71362018060958	0.61898790545728	-2.7684227195742	0.005632834270279	0.107658631559407
TMEM192	904.839271899544	0.486214887043542	0.175634476377968	2.76833396876591	0.00563436858194914	0.107658631559407
FEN1	3614.24587425	-0.504660826645857	0.182315928106693	-2.76805670182873	0.00563916436344167	0.107658631559407
ZNF483	68.0758592832426	0.667799715232232	0.241280265607941	2.76773449975121	0.00564474199685189	0.107658631559407
ACTN2	427.832214985336	-1.09310641444234	0.394951124411606	-2.7677004745102	0.00564533129751329	0.107658631559407
RP11.565J7.1	6.19092719249231	-0.709588312102943	0.256416581151384	-2.7673261569774	0.00565181796013951	0.107707277365723
RILP	351.04984544293	-0.65842495855979	0.238027949778678	-2.76616657485814	0.0056719554102433	0.108001838383428
IRF7	1047.75522342015	-0.582010129208388	0.210417183810325	-2.76598193488335	0.00567516785775668	0.108001838383428
HAPLN3	1907.85068559688	-0.784272163291032	0.283623540892668	-2.76518712382843	0.00568901507577687	0.108148560028381
MSRB2	2740.63222570077	-0.595669053599367	0.215425156368172	-2.76508585924542	0.00569078149677952	0.108148560028381
CDCA2	552.572442598849	-0.68774124168025	0.248759760433623	-2.76468043095645	0.00569785859028657	0.108191531096802
TXNL4A	2651.33535680003	-0.462878127845359	0.167436260666374	-2.76450349525943	0.00570094963975694	0.108191531096802
RP11.20D14.6	49.3674281201218	1.77109892494844	0.640714036319251	2.76425803798989	0.00570524025883522	0.108197924409761
GMPPA	2609.83771486159	-0.41510353413318	0.15024585369201	-2.76282855022477	0.00573028577700488	0.108523413667086
AHNAK	50431.0976251951	0.467780739400508	0.169312427604904	2.76282577727898	0.00573033445695167	0.108523413667086
NAA10	2755.34898084115	-0.550797533174584	0.199389423807034	-2.76242100838627	0.00573744430559866	0.108582918995168
PPP1R27	6.0343082611829	-1.34964770875991	0.488657258094182	-2.76195162642972	0.00574569905669851	0.10866399473781
ZNF30.AS1	3.06600553356403	-0.852214401226627	0.308734893790478	-2.76034364228677	0.00577405900333342	0.109124930031231
RP11.876N24.5	54.8996407677609	-0.535790993686399	0.194133375917692	-2.75991179339282	0.00578169697388985	0.109193871212884
GREM1	11244.4950827396	1.4424438744379	0.522689042282735	2.759659678608	0.00578616025642465	0.109202801087805
KCNIP1	14.0165394014924	1.12736370474147	0.408644610556558	2.75878764975279	0.00580162207638171	0.109419152131125
GFRA3	33.6509544604208	-1.19144953481329	0.431975599069562	-2.75814082411037	0.00581311490291852	0.10956040112484
LAD1	42.4299224580782	1.23529670724934	0.447954891783815	2.75763638238267	0.00582209208713488	0.109654075744345
SLC30A8	34.0829981987301	1.82516472028614	0.661922706873499	2.75736834729097	0.005826867196762	0.109668533498342
SCUBE1	689.372608043562	1.58010911695651	0.573316397997504	2.75608568405781	0.00584976706201859	0.110023866267492
CYBB	1906.99319667996	-0.843693176825832	0.306173331476938	-2.75560635133038	0.00585834557048023	0.110109536319891
HSPB11	1654.06308775535	-0.412086229123029	0.149566334391984	-2.75520711795365	0.00586549921324441	0.110168326334692
CTB.92J24.2	60.4826196349239	-0.534675147384264	0.194089820001854	-2.75478202503952	0.00587312487357119	0.110235895260733
RP5.1007H16.1	2.21443932703784	0.897100187025467	0.325824359194675	2.75332448820828	0.00589933924394946	0.110652034098643
RAET1E.AS1	13.0432046143417	-0.865626662010955	0.314439279512122	-2.75292152861451	0.00590660521417105	0.110701546076051
IRX3	671.903416651375	-0.850519062655083	0.308972981756329	-2.75272956819844	0.00591006938599397	0.110701546076051
SCARNA7	4.66925707015116	-0.935227984602776	0.33981838748808	-2.75214061109504	0.0059207093024552	0.110824986847462
GDPD3	226.164464751162	-0.55006640006718	0.199893194913499	-2.75180153233938	0.00592684282169945	0.110863964906786
RFWD3	1588.0496861277	-0.37564463283574	0.136527791229801	-2.75141514743663	0.00593383903111397	0.110873150971723
EXOC6B	2904.22777106034	0.61262799629524	0.222666373557236	2.75132695839125	0.00593543689883702	0.110873150971723
SERINC1	11930.7254417121	0.359548699813921	0.130700057308632	2.75094523459077	0.00594235769688767	0.110926712641902
RHNO1	1778.51404428163	-0.2834765204712	0.103064454230068	-2.7504780633525	0.0059508375852667	0.111009285179556
LINC01119	45.6959451119363	0.708974008475344	0.257794356193174	2.75015333518041	0.00595673833190749	0.111043665661431
SEMA3E	442.930389264237	1.77937699295406	0.647125817750186	2.74966157143953	0.00596568437759727	0.111133331332442
TMSB15A	534.292275071117	-0.888658533595055	0.323221079859918	-2.74938297335123	0.0059707579364002	0.111133331332442
INA	19.5366849996563	1.28481456233644	0.467337883306953	2.74921980055393	0.00597373128663384	0.111133331332442
RP11.110I1.6	7.43903960968931	-0.989293461934533	0.360005629274967	-2.74799442421753	0.0059961028759001	0.111473744090953
HNRNPA1P16	105.678435349343	-0.552313639381991	0.201052854633413	-2.74710667694345	0.00601235752472888	0.111683568982289
RPL9P29	34.1245427150712	-0.65402010382427	0.238091072448154	-2.74693249561756	0.00601555143900803	0.111683568982289
C3orf67	395.791919637509	-0.793591016034559	0.288992253708419	-2.74606327972811	0.00603151286695872	0.11187648745084
AC008697.1	3.60713257907262	-0.950246317311765	0.346065187363794	-2.7458593120863	0.00603526385132063	0.11187648745084
NPIPP1	396.472720597336	-0.430769518363842	0.15689501009971	-2.74559094065566	0.00604020242908804	0.11187648745084
CTC.329D1.2	26.1412597481947	-0.478686919644184	0.174356481092998	-2.74544953329761	0.00604280607505102	0.11187648745084
CYP1B1	4032.91870583926	1.09485104682745	0.39886181682962	2.74493822329235	0.00605222894845196	0.11187648745084
C5orf34	399.87045268687	-0.475647172064289	0.173282180002117	-2.7449283709293	0.00605241064643104	0.11187648745084
ABCB1	452.287557399665	1.11583672377161	0.406564819744898	2.74454814971878	0.00605942646815047	0.11187648745084
INTS9	922.899773329901	-0.30482483538542	0.111067336251061	-2.74450478128314	0.0060602271655152	0.11187648745084
BBOX1	71.6704780065376	-1.25524855550692	0.457397063902483	-2.74433015550475	0.00606345218925148	0.11187648745084
C9orf173.AS1	13.2157344135409	-0.771632884447897	0.281247444076869	-2.74360852231246	0.00607679585622745	0.11187648745084
YAP1	11459.3644350534	0.512572554945578	0.186824334029077	2.74360702319326	0.00607682360384166	0.11187648745084
RP1.122K4.3	2.58684742717032	-0.953955249862396	0.347712869926258	-2.74351435442901	0.00607853905735273	0.11187648745084
FAM89A	400.15143281483	-0.96773449377583	0.352739164905754	-2.7434846766573	0.00607908853465612	0.11187648745084
CCDC134	154.083382237579	-0.527386966368674	0.192294189652604	-2.7426047938393	0.006095399708507	0.112026614046654
TCEAL1	3402.80812447175	0.686987666237278	0.250500385934344	2.74246150829219	0.00609805964988109	0.112026614046654
UHRF1BP1	1034.27881523663	-0.389664206709176	0.142089703791677	-2.74238172303095	0.00609954123017048	0.112026614046654
FAM120AOS	2570.23707167256	0.29462943764739	0.107444641918539	2.74215104994038	0.00610382656080689	0.112026614046654
GMFG	906.275824035838	-0.738456393611281	0.269318759670723	-2.74194190747848	0.00610771424971162	0.112026614046654
ADAM28	227.072173157465	-0.839065351403812	0.306035932094823	-2.74172168496813	0.0061118103128695	0.112026658420621
NEURL4	1232.55722955425	-0.317665110044864	0.115885092959399	-2.74120770784694	0.00612137973797819	0.112094186776316
RNY3P16	8.7808954667241	-1.18230914601267	0.431329059847502	-2.74108391034604	0.00612368666339954	0.112094186776316
ATG4A	776.403838425653	-0.298004341345399	0.108786389571907	-2.73935317201074	0.00615602049218157	0.112496379649566
HOXA.AS3	41.6262161872559	0.720164713951957	0.262900927301182	2.7393007751811	0.00615700176829322	0.112496379649566
NBR2	281.015499791165	-0.453911611599844	0.165711495388709	-2.73916791671637	0.00615949054333357	0.112496379649566
LAPTM4A	18739.9330836355	0.319928670418706	0.116821156386005	2.73861927339245	0.00616977761792889	0.112496379649566
PCAT29	6.27158040466706	-1.2825812832873	0.468338822830082	-2.73857562253094	0.00617059673658673	0.112496379649566
RP11.575F12.2	7.94902541443526	1.68446741424114	0.615106843896665	2.73849564665894	0.00617209775666229	0.112496379649566
RABEP2	1387.43342158191	-0.41807028776203	0.152680503745218	-2.73820348706521	0.00617758392294331	0.112496379649566
RAD51	586.743056660039	-0.510879673299738	0.186578250703969	-2.7381523375429	0.00617854485906954	0.112496379649566
PSMB9	2519.13103794589	-0.596651169664902	0.217925977402449	-2.73786162061374	0.00618400905840493	0.112521005247546
C19orf35	47.6053779628222	-0.93969440703092	0.343315209879196	-2.73711848467644	0.00619799652783238	0.112700580053595
DCLRE1C	388.132069176713	-0.364431600429804	0.133155330049973	-2.73689081986453	0.0062022873821389	0.112703716135201
GPD2	1477.68305354451	-0.385402756872037	0.140856747138611	-2.73613273557127	0.00621659446947256	0.112888735402512
SHANK2	106.824873949558	1.54045577898506	0.56305496139363	2.73588882899148	0.00622120395589325	0.112897524838843
GNPDA2	1255.07307404152	0.272811645729003	0.0997653808529224	2.73453219339874	0.00624689863569848	0.113288686590142
MPDU1	1893.07655355245	-0.678001872978516	0.247985763214142	-2.73403547119375	0.00625633042290624	0.113310988902606
GPM6B	742.60649841339	1.01681320353038	0.371909861212593	2.73403130590599	0.00625640956777889	0.113310988902606
RP5.1171I10.5	49.0161911824337	-0.943882835169067	0.345267921211463	-2.73376927650042	0.00626139021574976	0.113326193547757
IDH2	11202.473706329	-0.505873344609775	0.18507344001066	-2.73336543904213	0.00626907333723249	0.113390258391741
SRP54.AS1	40.2322764983977	-0.36486010000105	0.13349750002038	-2.73308563789846	0.00627440160876928	0.113411673993118
UXT	2937.60663161084	-0.47085124624154	0.172293433006414	-2.73284499603656	0.00627898742783073	0.113419650132024
NBEA	1315.86440076173	0.816130691442208	0.298673624776859	2.73251677998666	0.00628524697808891	0.113457829025317
NDUFB4	5188.96069957065	-0.400747938302982	0.146717916904024	-2.73141785788257	0.00630624590484835	0.113761849328991
RP11.97O12.5	3.45628765476491	-0.672880097022242	0.246407823763096	-2.7307578418012	0.00631888825806066	0.113914819545512
PHLDB1	5992.24511117276	0.46445581725567	0.170106009574803	2.73039041017202	0.00632593614899076	0.113948415099559
ELOF1	3246.71258512299	-0.365689673419688	0.133941141153864	-2.73022665231443	0.00632907954948952	0.113948415099559
SDC4	8004.99187280111	0.675238568585381	0.247403303758768	2.72930295726276	0.00634683660478698	0.114115019672179
ZFAND1	1226.45660920109	0.337833811648869	0.123796615860709	2.72894221946249	0.00635378357073873	0.114115019672179
RP11.567M16.1	30.9603689786794	1.21623275580279	0.445687674447284	2.72889026449091	0.00635478466547002	0.114115019672179
KIAA1875	63.0123294861983	-0.642391163098789	0.235422275667961	-2.72867621076272	0.00635891065852122	0.114115019672179
OVOL3	6.07467578133756	-0.69495808423706	0.254688218520315	-2.72866208054154	0.00635918311043164	0.114115019672179
KIF11	1952.54164948285	-0.602461686152214	0.220955069096357	-2.72662532077725	0.00639856496455112	0.114746480222743
MGAT4A	1076.59792161949	-0.549784045276493	0.201728176797542	-2.7253706150741	0.00642293447875416	0.11510807134616
LILRB1	277.989140132426	-0.763604787590981	0.280217973293644	-2.72503857841691	0.00642939741670691	0.115148488027226
HOXB8	94.1505779574288	1.00727270318707	0.369744505581735	2.72423981419895	0.0064449689623094	0.115253081513372
ACOT4	283.32877612512	-0.795160992662868	0.291918928066777	-2.72391036075939	0.00645140138452625	0.115253081513372
CDH18	89.6733754150654	2.05991781374633	0.756242139224476	2.72388657931541	0.00645186592937234	0.115253081513372
RP5.891H21.5	3.16685087925435	-1.0041411559498	0.368665789358775	-2.7237166694971	0.0064551858099985	0.115253081513372
NDN	2396.76424681395	1.08720862872907	0.399171946826431	2.72365990990298	0.00645629518234301	0.115253081513372
HLA.C	52452.0384621604	-0.583750901554383	0.214405753665557	-2.72264569198527	0.00647614711575945	0.115532100371495
PARP15	84.8401402303057	-0.861302285344403	0.316515587617786	-2.72120021584683	0.00650453524222702	0.11588300293867
RP13.401N8.1	11.3968966452808	1.08747930194699	0.399658040196964	2.72102445733619	0.00650799463624905	0.11588300293867
RPA1	6703.74603774555	-0.401399414441353	0.147524446808003	-2.72090099726831	0.00651042564753178	0.11588300293867
DUSP5	1191.62613811867	0.67658221368932	0.248671901072065	2.72078272926078	0.00651275518963948	0.11588300293867
FBXL8	246.607969271894	-0.441684315556486	0.162403366843488	-2.7196746233848	0.00653461816028664	0.116180516262844
FBF1	476.352857091931	-0.481061732726894	0.176903026272578	-2.71935275988811	0.00654098089866821	0.116180516262844
LCMT1.AS1	24.0896475955521	-0.627795701776985	0.230867462985158	-2.7192905126581	0.00654221207195214	0.116180516262844
OAS3	3019.3612178753	-0.621847187198668	0.228732879234123	-2.7186611268167	0.00655467225853386	0.116326304167988
SCARNA10	3.33224879232038	-0.996030327919718	0.366483368419737	-2.71780499130033	0.0065716557543461	0.116552126619206
NUDT8	257.295850588624	-0.715774044989905	0.263410099557513	-2.71733713396825	0.0065809535362691	0.116577189581811
DPF1	307.488655360018	-0.823487261900618	0.303052915941233	-2.71730519187713	0.00658158875626319	0.116577189581811
SLC4A10	5.81486767287562	0.970114863628668	0.357055361145069	2.71698724958933	0.00658791455787243	0.116613757950024
CSE1L	5504.09013935686	-0.299925041331424	0.110398625443473	-2.71674615627341	0.00659271501132925	0.116623296056908
TMPO	5835.57876146918	-0.432989734809936	0.15940402705324	-2.71630361424508	0.00660153473387825	0.116639331692308
PPM1J	97.0977669942095	0.720747765900919	0.265365038244134	2.71606150783826	0.00660636432658138	0.116639331692308
RP11.372K14.2	27.9607906385671	0.593713389141906	0.218606139796193	2.71590445581915	0.00660949893405179	0.116639331692308
GLULP4	2.38962339026336	-1.04402418709881	0.384419539971178	-2.7158457844705	0.00661067030091243	0.116639331692308
TRAV8.3	5.3122087420017	-1.4940949846588	0.550277821444856	-2.71516482480754	0.00662427924612952	0.116804140366998
RP11.197M22.2	8.95646627073598	-0.858717349206243	0.316351803912777	-2.71443797248902	0.00663883314307722	0.116985388147747
RP11.875O11.2	2.914277208083	1.23662884559322	0.45567414605713	2.71384465476823	0.00665073455743392	0.117099193561481
CTD.2538C1.2	51.959073241154	-0.557990127818263	0.205620474664619	-2.7136895230321	0.00665384952086904	0.117099193561481
VMO1	224.60408275453	-0.899209969756661	0.331507585008299	-2.7124868643176	0.00667804280883092	0.1172838693003
HCST	319.997242143002	-0.836382466160801	0.308360447451568	-2.71235326408769	0.00668073525283202	0.1172838693003
KREMEN2	61.7194518978525	-0.82534862163135	0.304341436149451	-2.71191669485995	0.00668954023383521	0.1172838693003
HS1BP3	3370.17494003466	0.464737015402593	0.171374488989027	2.7118214510466	0.00669146255188518	0.1172838693003
FGF17	31.2321942874321	-1.12694002965074	0.415566200632831	-2.71181830460374	0.00669152606541583	0.1172838693003
GPR19	100.262327136887	-0.795725907637149	0.293438379044807	-2.71173085888552	0.00669329144582424	0.1172838693003
CFAP97	2031.99349663984	0.331947286784846	0.122418218607652	2.71158403185665	0.00669625657566345	0.1172838693003
LECT1	1.74743481302762	1.73371734879557	0.639402070667671	2.71146658468779	0.00669862923760759	0.1172838693003
TENM4	791.603107354937	1.05986086000178	0.391106917025325	2.70990057670894	0.00673033795152988	0.117763701011232
AC068831.6	22.2349445517668	-0.556775092121735	0.205527981882824	-2.70899897435457	0.00674865483801488	0.118008746515729
CTD.3001H11.2	17.8166339577112	-0.533391898936311	0.196954070855206	-2.70820448960633	0.00676483265418996	0.118142468261686
MTHFD1P1	3.14469090697704	-0.674039673240963	0.248888494844389	-2.70819940336089	0.00676493633582045	0.118142468261686
DNAH10	63.7429158232321	-0.786512524454661	0.290546581079372	-2.70701008262699	0.00678921953961854	0.118479447133166
RP11.519G16.3	9.19481739764547	0.912023931701757	0.336934247325295	2.70683060253367	0.00679289090667025	0.118479447133166
MRFAP1	18724.822395491	0.251733165321166	0.0930194155722441	2.70624324795565	0.00680491805388993	0.118554100498307
SLC39A10	1099.70176011089	0.446055310570374	0.164843914358462	2.70592525242032	0.00681143756918739	0.118554100498307
KLF9	5165.1476659612	0.61898750835408	0.228762920421647	2.70580348953924	0.00681393542630147	0.118554100498307
AC009299.5	70.682271736464	0.600711591037745	0.222011442969995	2.70576859913898	0.00681465132351146	0.118554100498307
TBC1D25	1646.59109621214	-0.295685129853104	0.109287760197261	-2.70556491705385	0.00681883191494317	0.118554100498307
RP11.806L2.2	8.90029685600615	-0.84618177423852	0.312796828506001	-2.70521212852478	0.00682607838136623	0.118604737132996
SLC9A4	2.19947286084196	1.72262675754956	0.63693946327976	2.70453764739167	0.00683995185147212	0.118746077709748
RRP36	1976.311881401	-0.338199713792213	0.125064083936728	-2.70421133827128	0.00684667282578303	0.118746077709748
NRIP2	298.272165634529	0.678348241144153	0.250865559527066	2.70403096552186	0.00685039050123207	0.118746077709748
CECR7	153.33654835999	1.73277220195305	0.640824337958104	2.70397377146175	0.0068515697107247	0.118746077709748
RP11.477I4.4	31.5873976453208	-0.665489622964864	0.246148752492655	-2.70360753904175	0.00685912490181099	0.118773583705521
EMC9	1070.20796098986	-0.389300705937096	0.144001311193681	-2.70345250824479	0.00686232536372184	0.118773583705521
RP5.1031D4.3	17.2630394135514	-0.981449859167989	0.363090792130572	-2.70304254593999	0.00687079510795255	0.118773583705521
OXNAD1	506.281285872898	-0.297404563743888	0.110027018214897	-2.70301393756776	0.00687138650197439	0.118773583705521
CDH1	1471.04931636224	-1.47524280737552	0.545810887026941	-2.70284606342545	0.00687485772818625	0.118773583705521
CTU1	196.600073070971	-0.532309764326882	0.196994994914215	-2.70214867417664	0.00688929490321099	0.118947914398279
PSME2P2	53.6632799824376	-0.496432876718355	0.18374783295375	-2.70170738200384	0.00689844448656729	0.119030789293443
CNNM1	127.285911573719	1.55045040589311	0.573945537311679	2.70138942652174	0.00690504361881789	0.119069580133945
RN7SL138P	15.9752973432407	-0.813280953393133	0.301168127677362	-2.70042172013763	0.00692516317233554	0.119341319505122
ENSG00000183048	331.637131164325	-0.670207994600987	0.248253718455377	-2.69968965126077	0.00694041856470398	0.119528945526551
LMNTD2	67.9528147530313	-0.746133146170315	0.276467884909361	-2.69880585376103	0.00695887600580573	0.119707694626683
RPSAP15	12.8298289296758	-0.664668957876183	0.246299275638261	-2.69862327509392	0.00696269451330306	0.119707694626683
C3orf80	441.264072408301	1.0326647589341	0.382671858708539	2.69856467214283	0.00696392055271797	0.119707694626683
ORAI1	1314.73045284161	-0.408912245950713	0.151549882942388	-2.6982023213186	0.00697150564519051	0.119762852157115
PCNXL2	1048.62524699774	0.585680292405457	0.217149729675545	2.69712650934704	0.00699406936456724	0.120075095502351
GPR37L1	12.0441631172913	1.02245183395526	0.379286969214988	2.69572096313099	0.00702364763405957	0.120493622279152
ITGA2	896.98057885475	0.748053314295098	0.277514170168191	2.69554997440935	0.00702725356857145	0.120493622279152
KLF7	2451.21328663219	0.427490337523376	0.158636713111087	2.6947755607116	0.00704360579164768	0.120695227763906
CTD.2020K17.1	98.7930420692979	-0.838865566652083	0.311316388557179	-2.6945756712002	0.0070478321262414	0.120695227763906
RP11.483P21.2	21.8464694699828	-0.684629295039831	0.254162013860407	-2.69367276659937	0.00706695094465798	0.120776246589686
ULK4P2	3.868809773424	-1.04445542336868	0.387768907602438	-2.69349966666103	0.00707062161539664	0.120776246589686
DDX39BP2	2.16488219472842	-1.22620333638056	0.455282519288005	-2.69328007211469	0.00707528069090848	0.120776246589686
TMSB10	59944.4331383957	-0.819135638863164	0.304144595646173	-2.69324410359113	0.00707604408759526	0.120776246589686
HAUS7	319.090444212035	-0.585309994217001	0.21733405850513	-2.6931351590399	0.00707835678026564	0.120776246589686
LY86	303.490724763987	-0.771399847993188	0.286483047940943	-2.69265442942442	0.00708856989347367	0.120776246589686
ZNF414	815.855023192627	-0.350003536275374	0.129989111261733	-2.6925604220083	0.00709056862941055	0.120776246589686
CNOT4	1151.63302434622	0.258059674051635	0.0958418973591286	2.69255598190696	0.00709066304500831	0.120776246589686
AC007773.2	30.4987175863817	-0.629354364635552	0.233745251276668	-2.69247978813752	0.00709228342723178	0.120776246589686
C10orf11	528.904984434978	-0.751969852084932	0.279354620872516	-2.69181103837224	0.0071065197301812	0.120943419736405
RP11.258C19.7	451.294548904339	-0.447952702839669	0.166450299236312	-2.69120995813713	0.00711933737583861	0.121086256449471
RP11.358L22.3	74.1026189650467	-0.539786932768707	0.200614395591857	-2.69066898801662	0.00713089095354099	0.121207082573145
LEAP2	57.8247035501163	-0.479896297405184	0.178377620147575	-2.6903391636695	0.00713794331709036	0.121207082573145
HBE1	3.0006666416761	1.35608097379108	0.504071404558616	2.69025570886831	0.0071397287549481	0.121207082573145
C8orf4	1568.0139290213	0.889216985009362	0.330643781016789	2.68935040082974	0.00715912275772819	0.121357785909667
MZT2B	4844.56683709165	-0.543675018197058	0.20216304329505	-2.68928983920954	0.00716042182777087	0.121357785909667
AGAP1.IT1	5.69244001894031	-0.836080734031263	0.310900775742034	-2.6892204821161	0.00716190982401928	0.121357785909667
DYNC1LI1	2403.00869398957	-0.2253101754095	0.0838158920431534	-2.68815578904173	0.0071847867508327	0.121670095435203
AC096582.7	9.76213835813563	-1.17193888303231	0.436023302806779	-2.68778956420053	0.00719267092588093	0.121728282348582
OCIAD2	1499.53066751398	0.911140225767693	0.339105732368084	2.6868912518963	0.00721204290036865	0.12198069592799
ZFPM1	314.398976899103	-0.499469377120102	0.185914561356139	-2.68655329349548	0.00721934303802532	0.122028747114639
AKIRIN1	2517.18229054564	0.324982161160463	0.120991081447551	2.68600096199108	0.00723128806143216	0.122040325269412
FAM86JP	100.611635679199	0.464393925393095	0.172898697640625	2.68593073129071	0.00723280817937614	0.122040325269412
AC007292.6	36.4054721339215	-0.508389948279278	0.189280823826426	-2.68590308305864	0.00723340669396281	0.122040325269412
AC116614.1	7.00049140261077	1.7838426818336	0.664205631908944	2.68567834438077	0.00723827336956934	0.122047189791519
AC004988.1	81.9581782223721	-1.33980823663339	0.499064173116305	-2.684641192068	0.00726077080925446	0.122264428573401
KCND3	1797.06895694197	1.14553965593067	0.426760268093561	2.68426969794556	0.0072688443424727	0.122264428573401
GRM4	7.75165111182036	1.10896218396043	0.413172868099947	2.68401502029937	0.00727438380331428	0.122264428573401
CMYA5	462.836796760465	1.21249221243464	0.451766545585043	2.6838911032344	0.0072770804772645	0.122264428573401
DDX11.AS1	107.256270185111	-0.53350837749703	0.198785193770657	-2.68384363733121	0.0072781136643091	0.122264428573401
CAMK2N2	379.194930092106	-0.899229271796723	0.335065841666949	-2.68373901476518	0.00728039144132447	0.122264428573401
CENPP	656.476631724639	-0.517331917695562	0.192772088830123	-2.68364533908978	0.00728243143223865	0.122264428573401
SNPH	974.155631560332	0.726893837254317	0.270905036986065	2.68320532294757	0.00729202060243264	0.122302930332967
WAS	580.194643441106	-0.737612160871693	0.2749073500831	-2.68313000961497	0.0072936630235841	0.122302930332967
SLC35F1	205.577797554038	1.15812324383356	0.431695992264374	2.68272873639353	0.00730241952308023	0.122306293592174
RRM1	4965.63371208976	-0.359506951026202	0.134008815197567	-2.68271121191683	0.00730280215338786	0.122306293592174
WWTR1	7954.75905282442	0.414471017212866	0.15452968447326	2.68214497832994	0.00731517501108536	0.122438580644258
CCL20	16.0770787492163	1.53504192196819	0.572393451947379	2.68179504280791	0.00732283090674055	0.122480496718479
SLX1B	2.19647974587145	-1.0267968471801	0.382901483939608	-2.68162148815815	0.00732663060469743	0.122480496718479
RP1.137D17.1	19.9143474237872	1.00825645330565	0.376024542181977	2.68135810352961	0.00733240036381583	0.122502117433568
SOCS3	3102.04911955672	0.884267511210913	0.329951234735849	2.67999455107006	0.00736233586229956	0.122927201468999
STMN1	16034.0491551577	-0.609412419887285	0.227416770123661	-2.67971627402811	0.00736845862442522	0.122954413851232
CTD.2003D5.1	2.82961945513117	-1.2164198048592	0.454128248758244	-2.67858211460164	0.00739346012479587	0.123296422775846
RP11.162A12.4	53.099035259224	-0.556273023749455	0.207692450836011	-2.67834974988414	0.00739859177344473	0.1233068589964
RP11.90L20.2	9.87188612082613	-0.757651293006122	0.283003154355945	-2.67718320924858	0.0074244025025943	0.123661715694459
WASL	3547.03749250945	0.305705467839013	0.114282987124217	2.67498667589721	0.00747322202212348	0.124268563629871
L3MBTL3	535.555015798671	0.514222842785698	0.192243428713181	2.67485263984183	0.00747621036764704	0.124268563629871
MYBL2	2393.89327779907	-0.777384449710774	0.290647914255244	-2.67466034188734	0.00748049953888475	0.124268563629871
RP11.361H10.3	25.7390889317496	-1.4202127788641	0.530990552360709	-2.67464792461944	0.00748077657964294	0.124268563629871
ASTL	6.07621130711773	1.1848912540959	0.443061350289854	2.67432772757257	0.00748792365109318	0.124268563629871
LINC00632	50.5188807552877	-1.10538768067002	0.413334015362946	-2.67432062105847	0.00748808234399101	0.124268563629871
FAM78B	446.392985685224	-1.02619524769689	0.383817595737413	-2.67365347262234	0.00750299362382148	0.12440579983199
RPP21	538.3345649379	-0.396186547661732	0.14818778120995	-2.67354396176849	0.00750544381797174	0.12440579983199
CA5BP1	620.462108282655	-0.412841776437825	0.154475454547296	-2.67253964487559	0.00752794787364911	0.124703281785885
BUB1	1972.39939680718	-0.623612277858129	0.233369537144621	-2.67220943010943	0.00753536030935289	0.124750556700394
GPR89A	179.556383322369	-0.372758556050129	0.139544384464079	-2.67125443622622	0.00755683420528342	0.125030426155856
RPL13AP25	270.497828390218	-0.686265484840455	0.256932057936805	-2.67099983688781	0.00756256835605641	0.125049695245825
RP11.586K2.1	11.2429636098896	0.892894911485729	0.334403679367694	2.67011090659665	0.0075826196697458	0.125305537368517
RNF166	1070.46134140152	-0.331902747149355	0.12431668068004	-2.66981667571699	0.00758926703192063	0.125339699212758
BDKRB2	728.038345242817	0.80799374991039	0.30273962526638	2.66893951923022	0.00760911505761043	0.125591702452694
FAM195A	1066.06680303097	-0.649695557745636	0.243542760480691	-2.667685775029	0.00763756518308393	0.125901693008074
LLNLR.276H7.1	2.58380652332388	-1.11089489151106	0.416449562641727	-2.66753765921652	0.00764093253616815	0.125901693008074
ENSG00000280789	671.475756093812	-0.44769278587106	0.167841437328484	-2.66735552910499	0.00764507501483154	0.125901693008074
CAMP	1.40944292807281	-1.92558145424977	0.721921118236167	-2.66730173921833	0.00764629882991372	0.125901693008074
AC079325.6	7.14899026035079	-1.162066597149	0.435833089134309	-2.6663110858728	0.00766886936609053	0.12619740172726
RP11.22B23.2	3.43868017202204	-1.08091878626908	0.405485091497507	-2.66574236373799	0.00768185380269903	0.126245917271235
HHATL.AS1	11.6304254039924	-1.36799878446274	0.513227839263495	-2.66548047437544	0.00768783959481421	0.126245917271235
RP11.433C9.2	2.11340537229286	1.62769386062348	0.610693243069571	2.66532154906788	0.00769147405903367	0.126245917271235
RP4.753P9.3	2.59906890698204	-1.02051429074136	0.382890842180748	-2.66528780090179	0.00769224604432662	0.126245917271235
PLK1	1883.33298025668	-0.651098074000286	0.244298660282322	-2.66517251158009	0.00769488379772054	0.126245917271235
ARL6IP4	148.193714397639	-0.417449887192497	0.156664192241004	-2.66461583352955	0.00770763168197834	0.126379298148004
UBL3	2109.48645040897	0.473570306853168	0.177756404804391	2.66415326848166	0.00771823877971747	0.126477438590268
NPY5R	3.55997677267044	1.5657790731488	0.587771636897838	2.66392417540378	0.00772349696455515	0.126487862317185
APLP1	1730.77990505967	-0.830593603770737	0.311894155274421	-2.66306241949272	0.00774330489981057	0.126736412612569
RP11.370F5.4	2.14497616886938	1.5014549944281	0.563854074939478	2.66284320919249	0.00774835082668297	0.126743197084881
ALDH1A2	810.181643712943	1.46704499932436	0.551279530683402	2.66116356162492	0.00778711194426579	0.127301138271671
FAM162B	101.417037728302	0.991319992616972	0.372616798077589	2.66042754307215	0.00780415167339112	0.127417042474162
DOK6	289.151331284507	1.1001877842183	0.41356711014408	2.66024003658079	0.00780849801371005	0.127417042474162
RP11.138B4.1	4.84581745155597	1.52258910632769	0.572369216942403	2.6601519810261	0.00781053986147553	0.127417042474162
DVL2	2897.87507294654	-0.394851522422675	0.148449824469284	-2.65983152108324	0.00781797478207665	0.127417042474162
SRRD	943.484882418444	0.297472102136196	0.111844228306846	2.65970007249794	0.00782102632516614	0.127417042474162
UNKL	765.957052377054	0.411270812140667	0.154647387985614	2.65941001330669	0.00782776374586089	0.127417042474162
HDGFRP2	5983.49952511397	-0.337832825250938	0.127045728074335	-2.65914352549714	0.00783395823901845	0.127417042474162
RP11.661A12.9	10.6840354457875	-0.978819471207308	0.368132165168911	-2.65888059729362	0.00784007429290035	0.127417042474162
TRPC5	3.25880276110561	1.3868012640192	0.521602178659971	2.65873364942988	0.00784349435547858	0.127417042474162
SH2D5	56.4574905688883	1.01626493228451	0.382281866726787	2.65841783442694	0.00785084915277124	0.127417042474162
WNT10A	22.2758001002014	-1.15683051803394	0.435167784239311	-2.65835514468544	0.00785230982550514	0.127417042474162
IGKV3.20	357.676726135323	-1.55037923788751	0.583219473551246	-2.65831185033516	0.00785331872719557	0.127417042474162
TSPAN33	702.608564287154	-0.697284779142202	0.262309580608335	-2.65825128279758	0.0078547303461928	0.127417042474162
CRYBA2	4.98974395201135	-1.43950083517242	0.541797499766839	-2.65689826142038	0.00788632388725797	0.127853755627193
ATG4D	837.710394444976	-0.336184039256845	0.126571538094738	-2.65607927593654	0.00790550275217246	0.128088803028982
MYO3A	372.014389607764	-1.77183823061012	0.667254761438409	-2.65541489249255	0.00792109185182358	0.128182246640384
OR2L13	9.89835190693515	1.96592867179765	0.740451008374846	2.65504219666404	0.00792984883959591	0.128182246640384
MAP2K2	7470.62032610192	-0.389993775845121	0.146891321364096	-2.65498173903993	0.00793127018951209	0.128182246640384
RPS6KA1	1154.45081961065	-0.557562514614255	0.210010647182561	-2.65492498639638	0.00793260464349523	0.128182246640384
WDR62	1586.52421352117	-0.598510950522392	0.225441751973108	-2.65483631707131	0.00793468997328108	0.128182246640384
RP1.197B17.7	17.5958463689291	0.682778088671732	0.257304662599775	2.65357837581731	0.00796432723659115	0.128585120446344
TRMT11	713.313122382557	0.397628589704106	0.149861753222237	2.65330266832288	0.00797083617170175	0.128614329407305
GMPSP1	13.801248146738	-0.619346906340224	0.233526788464128	-2.65214500834607	0.00799821836954647	0.128939413676244
AC008073.9	1.7810777697713	1.42799509545789	0.538448998901723	2.65205265191424	0.00800040650523505	0.128939413676244
OAS1	1411.10460445918	-0.72741410134936	0.274324300040041	-2.65165754999898	0.00800977342860455	0.128980326086068
NEK2	799.957724600945	-0.679836391241113	0.256392258628153	-2.6515480415775	0.00801237134935013	0.128980326086068
OTX1	82.7540172681433	-1.08789680825457	0.410366877451852	-2.6510346424882	0.00802456102478956	0.12905301828916
WDR76	1896.2620871342	-0.573070043168214	0.21617447941275	-2.65096067179156	0.00802631868479683	0.12905301828916
TNS1	49950.9335619092	0.784943433351932	0.296176932612921	2.65025174792322	0.00804318132060737	0.12916247208505
RP11.1082L8.3	10.8810629409098	-1.19469006933573	0.450858341796847	-2.64981249892022	0.00805364531255822	0.12916247208505
CTD.3064M3.7	45.2769386900392	-1.02801283752678	0.388000961147107	-2.64951105916724	0.00806083339954418	0.12916247208505
CARD11	237.698710381268	-0.864914019806539	0.326460955060656	-2.64936436164575	0.00806433360389227	0.12916247208505
LRAT	35.639154300038	1.53428820738997	0.579122824453521	2.64933126895451	0.00806512338391388	0.12916247208505
RP11.276E15.4	4.88605998442265	-0.790605139547708	0.298426162598846	-2.64924875440785	0.00806709295238201	0.12916247208505
RP5.877J2.1	2.44915728744691	1.09241001652574	0.412358026284003	2.64917849755485	0.00806877027708534	0.12916247208505
BMP4	474.671911819214	0.877527335423936	0.331277066133015	2.64892268477043	0.00807488023577816	0.12916247208505
EMR1	55.751090526272	-1.04340243312609	0.393902444203339	-2.6488853991154	0.00807577113051859	0.12916247208505
PPAN	438.261083654692	-0.463199010209676	0.1748783690799	-2.64869241774576	0.00808038358882395	0.12916247208505
AC003090.1	126.588001756262	1.15982290886227	0.437948025443377	2.6483117664204	0.00808948847140839	0.12916247208505
F10	1022.12651502196	1.32605948602286	0.500720974129527	2.64830026009622	0.00808976383665043	0.12916247208505
TAF11	1631.74214317062	-0.247992642738018	0.0936631231063032	-2.6477084525204	0.00810393808385254	0.129275479990337
TYROBP	2997.05024327358	-0.792706151450494	0.299404385282747	-2.64761035714921	0.00810628969025133	0.129275479990337
RP11.396K3.1	243.090652932344	0.40637329810208	0.15351074256917	2.64719778760092	0.00811618676587792	0.129340061189953
AC083862.6	2.16902823531772	-1.01633426380588	0.383966216500656	-2.64693668382709	0.00812245593681136	0.129340061189953
CTD.2134A5.4	5.76235201520062	-1.19022773941538	0.44967692359079	-2.64685083217322	0.00812451820454321	0.129340061189953
MRPL41	1789.47357133368	-0.671746810150047	0.253821825501733	-2.64652895322219	0.00813225432652108	0.129387948778823
DNAJB13	9.56213766252653	-0.752499489780774	0.284378178877822	-2.64612247237181	0.00814203321298373	0.129468263164737
NCKAP1	10376.5490917654	0.347321063700846	0.131270146734622	2.64584958835307	0.00814860400578198	0.129473800124654
GJA3	167.144481175504	1.39163620206315	0.526022358777464	2.64558374533256	0.0081550098216719	0.129473800124654
MCUR1	1759.1460315294	-0.335826171045885	0.126941683595689	-2.64551533848799	0.00815665889802587	0.129473800124654
COL6A4P2	28.8405301558689	1.01208578098436	0.38261126930871	2.64520640704851	0.00816410999280023	0.129473800124654
ZNF488	21.8210064440063	1.05930046593146	0.400489893852082	2.64501172736883	0.00816880858629598	0.129473800124654
DNASE2	3588.50880398164	-0.348172495520787	0.131637670348947	-2.64493054759969	0.00817076857470133	0.129473800124654
LINC00316	3.22549583406607	1.43617953838054	0.543133722447148	2.644246672642	0.00818729663228332	0.129583909699596
CD22	101.354451747186	1.02903673570213	0.389182712069387	2.64409672832195	0.00819092452038096	0.129583909699596
GRIK3	51.5836257499893	1.12356848840716	0.424941344932984	2.64405547213664	0.00819192296208072	0.129583909699596
RP11.373N22.3	17.1697567263786	-0.712467719358243	0.269507806242935	-2.64358843363529	0.00820323336755906	0.129687859235483
KRBA2	43.90442578377	-0.716282027796283	0.271037323169524	-2.64274314481875	0.00822373951045226	0.129936983512146
MCEMP1	10.5951753865401	1.4391377112324	0.544618523723619	2.64246926709883	0.00823039343351705	0.129967078304459
DYNC1I2	3947.24803539712	0.285434766453611	0.10806491134582	2.64132698485437	0.00825819742606927	0.13033092892838
SMIM4	666.746883139972	-0.47718587179786	0.180744906731766	-2.64010688005736	0.00828798847844027	0.130725701844955
CETP	169.545150156982	-0.721581049225355	0.273372094426894	-2.63955635537014	0.00830146198173694	0.130798623060525
CACNA2D2	279.90408656291	0.873167778414012	0.330804588123907	2.63952741213781	0.008302170878321	0.130798623060525
PPP4C	4306.4484703167	-0.394439646387731	0.149467567353869	-2.63896478259985	0.00831596193261053	0.130891067312195
RP11.455F5.5	7.23824967826798	-0.879735176456991	0.333372201127343	-2.63889782495975	0.00831760454782969	0.130891067312195
SPC25	421.277366703928	-0.588391297953123	0.223055113200219	-2.63787406399857	0.00834275578416178	0.131211410798489
MAP4K3	1384.63930377376	0.374704440434723	0.142069309483419	2.63747632614808	0.00835254554072545	0.131250572957981
C16orf93	71.1169605598429	-0.503028639462708	0.190730202046822	-2.63738324641014	0.00835483805060303	0.131250572957981
TECTA	92.1177318240084	0.643571965730591	0.244109883812834	2.63640273666279	0.0083790217577542	0.131459404785268
RP11.673E1.3	11.0269746050508	1.14991734402736	0.436190333696626	2.6362742481752	0.00838219548802538	0.131459404785268
SIRPG	80.0775288660644	-1.18317607592507	0.448808534605303	-2.63626019715868	0.00838254262041557	0.131459404785268
NEK5	24.1832905273042	0.463579261634556	0.175861857741397	2.63604210479935	0.00838793227260225	0.131468587956491
DEPDC4	29.7894343827893	-0.514623413370347	0.195271355724065	-2.63542705207391	0.00840314858982661	0.13163169107567
AFAP1.AS1	23.2176612788302	0.794396014387423	0.301477619125116	2.6350082526615	0.00841352375233104	0.131718816365155
ZNF774	380.131911046888	-0.723540508297529	0.274624943404763	-2.63464964007701	0.00842241697549848	0.131764923848631
B4GALNT3	472.566349126303	1.07376578147214	0.407578387194918	2.6345012768271	0.00842609868943593	0.131764923848631
COX7A2L	3934.12538127379	0.330262025609142	0.125371243838509	2.63427254526208	0.00843177760658951	0.131778427174145
CTD.2521M24.6	14.7021362641761	-0.492598425401413	0.187064471283858	-2.6333083028574	0.00845575533936269	0.132023964777979
LSM7	2631.748349163	-0.489925876256643	0.186064727270137	-2.63309378109773	0.00846109811858861	0.132023964777979
RP11.243M5.3	3.9867583859564	1.25616680540171	0.47714116324206	2.63269426780611	0.00847105625802037	0.132023964777979
MC4R	3.17085228294829	-1.96857903949251	0.747806598447924	-2.63247080672771	0.0084766307461898	0.132023964777979
SAA1	24.6388144813216	1.51995922904492	0.577404826177093	2.63239786045492	0.00847845118316659	0.132023964777979
RP11.392P7.6	53.1163811879546	-1.04475914238348	0.396902654727138	-2.63228056033469	0.00848137924165674	0.132023964777979
RAB27B	157.669068175439	0.989347146330266	0.375853685902805	2.63226671292006	0.00848172496201095	0.132023964777979
TRBV13	3.24339895476987	-1.77458727670757	0.674211672049086	-2.63209219044545	0.00848608324360393	0.132023964777979
TYRO3	1571.01684085146	-0.481470510452907	0.182946188514549	-2.63176026984907	0.00849437769352465	0.132077920432384
LA16c.360H6.1	13.9019594235684	-0.667887065031179	0.253860237979387	-2.63092428474525	0.0085153004736644	0.132328059490233
TSPAN5	1724.31560446622	0.667042432477404	0.253571514116783	2.63058898709812	0.00852370514004099	0.13236979494081
ADAMTS7P4	62.6584400740356	1.0348747180552	0.393451932390655	2.63024433954916	0.0085323519033149	0.13236979494081
DTL	1840.7648920805	-0.565904335760241	0.21515919876285	-2.63016565879661	0.0085343270013561	0.13236979494081
PAOX	256.477365587261	-0.411849758789724	0.156594133884034	-2.63004589363941	0.00853733421291129	0.13236979494081
SBDS	5755.03821412804	0.378159578538929	0.143815489958941	2.6294773855507	0.00855162194292214	0.132516243539076
PARP2	1830.7615633382	-0.34503128004863	0.131253130670251	-2.62874704996909	0.00857000808772838	0.13261754673398
RP11.386I14.2	3.32120734402705	1.12453151014174	0.4278122697287	2.6285630163316	0.00857464669223152	0.13261754673398
RP11.455O6.9	13.498457499083	-0.61894830237709	0.235509750481735	-2.62812177037695	0.00858577752814748	0.13261754673398
C8orf22	881.539500940436	-1.88844967734843	0.71865699305364	-2.62774827991895	0.00859520926147984	0.13261754673398
DOC2B	428.492855557976	0.903387442376816	0.343849737171802	2.62727390693175	0.00860720192794129	0.13261754673398
PLSCR4	1460.02754413986	0.557424067276868	0.212169957178066	2.62725257944528	0.00860774146125803	0.13261754673398
CFAP69	120.208910709781	0.629728928619614	0.239694202005805	2.62721802759486	0.00860861560284655	0.13261754673398
PPP1R17	10.4471607768062	1.58876101271753	0.604748127512845	2.62714498885949	0.00861046370127139	0.13261754673398
AURKA	1293.49707009537	-0.559022812259463	0.212802344947895	-2.62695795197341	0.00861519791089702	0.13261754673398
STAC2	1739.48754177285	-1.35014835550938	0.513969315345737	-2.62690459371327	0.00861654892228324	0.13261754673398
SNX9	6628.02831190785	0.371296833796761	0.141349316861439	2.62680317132861	0.00861911742161981	0.13261754673398
CD3D	177.153684410592	-1.08958142160803	0.414803591572436	-2.62674056769289	0.00862070318635887	0.13261754673398
CCDC78	139.901144575243	-0.819109043394102	0.311856976606379	-2.62655353203135	0.00862544239702539	0.13261754673398
GTSE1	1221.0859136998	-0.589303118657917	0.224365536600375	-2.62653136300316	0.00862600428219267	0.13261754673398
AC005363.11	2.06018776685086	-0.809776535880688	0.308434318068902	-2.62544239872747	0.00865364493749598	0.132707391521583
RP11.876N24.3	196.844503821031	-0.716434159884667	0.272881320051966	-2.62544229758282	0.00865364750847431	0.132707391521583
MIEF1	1916.54855710947	0.287901060668849	0.109659538349394	2.62540828643238	0.00865451207077633	0.132707391521583
PNCK	1037.92033774339	1.32382676714524	0.504253249169218	2.62532124349483	0.00865672505096026	0.132707391521583
ATG3	2583.32405914813	-0.259141345371049	0.0987144129553748	-2.62516219883916	0.00866076990967833	0.132707391521583
CNTN2	45.6757162029064	-1.26568927383817	0.482154941102852	-2.62506751656036	0.00866317869232569	0.132707391521583
CRYGS	125.588730727242	-0.588292318381434	0.22411436829491	-2.62496475731224	0.00866579363622993	0.132707391521583
AP1M1	5172.02488723885	-0.256678486781242	0.097811720187078	-2.62420992382416	0.00868502373339448	0.132845136004238
PSORS1C3	13.7509152503166	-1.40120599451295	0.533981879707448	-2.62407030605725	0.0086885848047176	0.132845136004238
ASPG	11.0344542439038	1.69217629560087	0.644883527476913	2.62400297650873	0.00869030256915238	0.132845136004238
HIATL2	156.22712440507	-0.381512324192855	0.145404404979493	-2.62380169463684	0.00869543964079278	0.132845136004238
TOR3A	2754.33828634436	-0.296482915007061	0.113010130843565	-2.62350740410582	0.00870295534369098	0.132845136004238
GRIK1	22.8157660708107	0.857599369262638	0.326906212935111	2.62338045387001	0.00870619923876996	0.132845136004238
CCM2	4108.87920764604	-0.380580294005742	0.145078034566798	-2.6232799137523	0.0087087690561866	0.132845136004238
CASC4	5480.20494913294	0.29993563492547	0.114353002684006	2.62289251603028	0.00871867732764886	0.132922185932278
NDUFA2	3130.43612625819	-0.446969221533264	0.170455101726311	-2.62221087551215	0.00873613575512524	0.133084085078005
CARD14	32.1406750297095	-0.59922443997926	0.228528597617725	-2.62209826790091	0.0087390229074463	0.133084085078005
NCAPH2	4761.11376632826	-0.394488343876692	0.150476591396243	-2.62159276879089	0.00875199393248512	0.133207489408447
OR1L8	2.6471410145852	1.25231978221636	0.477769118220092	2.62118193591461	0.00876254850698533	0.133293998022324
SLC7A14	3.24357225680803	1.32905815599167	0.507114794698085	2.62082307573561	0.00877177717243918	0.133311278260378
ENSG00000160223	33.8590258104235	-0.853149009496633	0.325535094053672	-2.62075894452096	0.00877342732393994	0.133311278260378
HRAS	2272.24541982219	-0.511593058432022	0.195290590631108	-2.61965032098443	0.0088019970393943	0.133671171465075
ALDH1A3	620.44886452493	1.07040027255454	0.408664354719547	2.61926507705601	0.0088119443883505	0.1337480144934
PREX2	457.37821633071	0.643476554665029	0.245691165091692	2.61904637240368	0.00881759600990034	0.133759607764375
LINC00159	3.58152555365937	-1.1116601569887	0.424517983003941	-2.61864090920826	0.00882808229042351	0.133812326019098
PAFAH1B3	1687.46154367438	-0.593731247031026	0.226754492039533	-2.61838802702754	0.00883462808860313	0.133812326019098
TRADD	1018.44170610498	-0.389737598962669	0.14884882951711	-2.61834507014293	0.00883574044860451	0.133812326019098
LINC01531	3.92348809973815	1.70466202178647	0.651301976596843	2.61731436881799	0.00886246779989189	0.134089612725841
IL2RG	731.318161402451	-0.936522187990162	0.357825273201501	-2.61726115545444	0.00886384964631465	0.134089612725841
TRAIP	479.868475216501	-0.451347691287182	0.172470827348934	-2.61695092570083	0.00887190953560419	0.134137390249361
HTR1F	12.0646950442276	-0.849504764476753	0.324643163817004	-2.61673387632338	0.00887755245444448	0.134148592196757
SIT1	113.247809144962	-0.915744718878218	0.349992583526281	-2.61646892528925	0.00888444508117958	0.134177462750068
DAAM2	2430.69058393405	0.68974163300729	0.263634123452746	2.61628359779048	0.00888926916487151	0.134177462750068
RP11.81A22.4	167.596218524029	-0.553451758741718	0.211593297852287	-2.61563936268002	0.00890605684435377	0.134356753915427
RP5.952N6.1	14.075442132154	1.58938320239952	0.607794075545689	2.61500278852264	0.00892267270169606	0.134533256834498
B3GAT3	2976.7141567142	-0.433727285887125	0.165906330635665	-2.61429014929877	0.00894130685296962	0.134739979811876
SIGLEC1	1196.63678566559	-0.782041202438819	0.299202465966485	-2.61375253012259	0.00895538755759548	0.134822711154561
GZMM	105.108377079746	-0.96400766314796	0.368828879676562	-2.61369897062651	0.00895679141061218	0.134822711154561
DCTPP1	1173.55241608525	-0.411941236712834	0.157619530572069	-2.6135164545772	0.00896157683220589	0.134822711154561
CHAF1B	1436.49440391103	-0.485083980412973	0.185631084062194	-2.61316138330826	0.00897089305299987	0.134888713894722
RP11.326C3.16	12.5437896314033	0.687177414810241	0.263001650706876	2.61282548213403	0.00897971425663597	0.134897164489269
HSD17B2	43.8461228262708	1.01397630717179	0.388121423962374	2.61252341295669	0.0089876536021291	0.134897164489269
PGLS	2607.80017976979	-0.51975948384878	0.198954331960992	-2.61245622915457	0.00898942025954301	0.134897164489269
INTS7	1776.90337717608	-0.384742419862636	0.147276049243751	-2.61238960332146	0.00899117255091816	0.134897164489269
RP11.417L19.6	12.5718943988295	-0.607217899559569	0.232460696104352	-2.61213146882683	0.00899796449255111	0.134925093864742
RP11.542B15.1	4.89801325235537	-1.08417414480889	0.41519924572505	-2.61121414831963	0.0090221377836541	0.135213484440021
KIDINS220	4036.76027751854	0.400723890961126	0.153490281451037	2.61074438832765	0.00903453936807028	0.135325235000882
RP11.467H10.2	3.20336831706357	-0.97698012587691	0.374245346080467	-2.61053380117878	0.00904010377269249	0.135334507573032
LRPPRC	5310.36810110103	0.300586391790958	0.11516505274907	2.61004866160134	0.00905293440147384	0.13545248924589
HPCAL4	103.880327915302	1.30825976225349	0.501315032352642	2.60965596047241	0.0090633321883003	0.135531988733042
CREB3L2	6122.32042911932	0.388025534755721	0.148698753156643	2.60947403067304	0.00906815286743407	0.135531988733042
GAPDHP2	10.279617518985	-0.634897904751046	0.243335880548853	-2.60914215905608	0.00907695252233824	0.135589455636631
SLITRK3	569.342219875763	1.83151977854382	0.702323599071484	2.60780042271854	0.00911260674806226	0.13604778847107
NXNL2	129.167395937125	-0.829561722782811	0.318240712422106	-2.60671149353922	0.00914163493166056	0.1363375566005
TMPRSS2	21.3873949378151	1.40296363055329	0.538270129234294	2.60643040428242	0.00914914147337756	0.1363375566005
PDZRN4	644.387760836733	1.49071817663228	0.571946652374918	2.60639374396599	0.00915012089953898	0.1363375566005
CH507.42P11.8	299.72078931383	1.07783195843942	0.413544642888137	2.60632552488649	0.00915194370661109	0.1363375566005
KCNMA1.AS1	16.9132635056343	0.940269087839424	0.360964097769222	2.60488257322637	0.00919057524416713	0.136838564816038
COX5A	3918.52126612239	-0.416295497196753	0.159832399606501	-2.60457515636161	0.00919882436915601	0.136886910106756
PAX5	11.9875540995164	-1.26827690398502	0.487067999951874	-2.60390110643758	0.00921693474117242	0.137081867460285
AC006946.16	32.2795202785505	1.67957936953985	0.645166038464903	2.60332886327404	0.00923233473707954	0.137236323962476
USF1	3019.78163438701	-0.274614045112923	0.105495438656685	-2.60308927674686	0.00923878921773106	0.137242950552993
PDE5A	5086.32337859539	0.914463472878102	0.351319448728963	2.6029400768632	0.00924281070924384	0.137242950552993
CTD.2196E14.5	2.16311282583444	-1.01100189134822	0.388492725043108	-2.6023702020058	0.00925818533736822	0.137396691942743
GIPR	26.6153100790208	-0.949588813264241	0.365071339719817	-2.60110479774454	0.00929240625033214	0.137829804578097
ARMC10	1323.45670607421	0.283619943630906	0.109046867436105	2.60089950586696	0.00929796868176198	0.137837600728656
ELP6	1577.63054786232	-0.237108810375755	0.0911865112295541	-2.60026189376687	0.00931526387926001	0.138019226486101
RSPH3	718.391205148699	0.326905544245327	0.12573837225931	2.59988687917122	0.00932544953286065	0.138095374413563
KIF18B	1338.89205844457	-0.62967143983458	0.242238093338049	-2.5993906703842	0.00933894217629992	0.138220384854853
C9orf9	527.491954025803	0.563309306851066	0.216726419799889	2.59917229921109	0.0093448855253289	0.138233587722244
IGKV1.27	12.167365672777	1.70966438854633	0.657946053644281	2.59848718459016	0.00936355401205103	0.13832382931049
RAG1	40.4453043632079	0.647632406518428	0.249236770889627	2.59846251500838	0.00936422684638009	0.13832382931049
CCDC151	182.628509345471	-0.792244166518964	0.304915776158202	-2.59823934497872	0.00937031551126753	0.13832382931049
LINC01460	21.9890333604719	0.980519534399784	0.377403789297534	2.59806489019317	0.00937507755552099	0.13832382931049
AC022007.5	271.953636098973	-0.567945547388413	0.218606936408441	-2.59802162145155	0.00937625898454138	0.13832382931049
RP11.109L13.1	162.54090639229	1.40290219007406	0.540100023052744	2.5974858918624	0.00939089779074729	0.138392795306848
KLF3	3030.68533960623	0.325219778086021	0.125205864299616	2.59748039682689	0.00939104804811875	0.138392795306848
ANGPTL7	18.6772198122026	-1.53203450975123	0.589991576866112	-2.59670573245979	0.00941225210357806	0.138630619519116
FILIP1L	11885.6726669394	0.794665537671355	0.306140280139903	2.5957562242649	0.00943830021786729	0.138853592482412
HJURP	1001.16469994553	-0.586026277217292	0.225765896184807	-2.59572542673842	0.00943914617026257	0.138853592482412
C11orf87	80.5241386597905	-1.43111301573584	0.551361313835896	-2.59559925555783	0.00944261257069976	0.138853592482412
ABLIM2	465.585035061618	-1.00781074364931	0.388321249538149	-2.59530155727495	0.00945079597111159	0.138899292451901
AC138969.4	29.625969949923	-0.521813493163948	0.201084910763189	-2.59499079858095	0.00945934513541177	0.138950316143681
LYAR	940.323333459232	0.394030680354343	0.151937841549413	2.59336763202731	0.00950411165632003	0.139533004070201
CNOT10	1665.99252533272	-0.235384507802719	0.0907742374398405	-2.59307612425516	0.00951217134943751	0.139576451018073
AC010525.4	2.13146611915425	-0.849097360034328	0.327502271323274	-2.59264571388634	0.00952408260642593	0.139666041530222
DPH6	330.758190639141	0.358146616214566	0.138147904350761	2.59248678362304	0.00952848423360827	0.139666041530222
HAGHL	211.265527190744	-0.703947800034269	0.271711742196581	-2.59078902642702	0.0095756175064358	0.140281771242571
HMCES	2944.039252909	-0.280042419027155	0.108224155082447	-2.58761474103276	0.00966430027979584	0.141505212122468
STARD13	1556.98423648825	0.488938202609493	0.188993825873991	2.5870591293045	0.00967989796053124	0.141657800849143
PROK2	3.61316261055469	1.08449204373073	0.41927043562076	2.58661701754636	0.00969232538624293	0.141751030601722
RP11.488C13.5	41.2099881188538	0.446970363205893	0.172811356807952	2.58646405804578	0.00969662827181261	0.141751030601722
HAPLN1	954.407011498765	1.75783544427395	0.679725765667969	2.58609505930163	0.00970701554102854	0.141775618441531
TRBV3.1	5.05941841896731	-1.4045830381549	0.54316010366179	-2.58594662731247	0.00971119667970239	0.141775618441531
CHEK2	614.414641409283	-0.363643236836072	0.140628915372092	-2.58583546544396	0.00971432901808378	0.141775618441531
C1QC	8589.7663688402	-0.760901436252014	0.294276718101273	-2.5856664474223	0.00971909336274577	0.141775618441531
CIR1	1975.75655123892	0.282233293612711	0.109160682403887	2.58548487786534	0.00972421383522451	0.141775618441531
AVPR2	96.0078446620503	0.860698249068056	0.333056062969009	2.58424435032172	0.00975926253377611	0.142189662077577
RP11.146F11.1	65.0782645259023	-0.464774276850986	0.179858400172309	-2.58411214825507	0.00976300427697752	0.142189662077577
LRRC9	2.93723923946449	-1.20543493414014	0.466524237379279	-2.58386346851286	0.00977004617724299	0.142216533875762
LINC01586	2.37314269104325	-0.894415581652051	0.34624315191415	-2.58320078449904	0.00978883360486924	0.14241425860226
MPST	2226.65604162702	-0.419641932028823	0.162500829973119	-2.58239869973736	0.00981161617636535	0.142669866249954
CSF2	3.50664957157872	1.64223263065361	0.636308395808554	2.5808753137177	0.00985501685851435	0.143224849362774
TRBV30	4.05262070906275	-1.52229001876258	0.589989819933902	-2.58019709379584	0.00987439405256674	0.143360696841841
METTL21B	726.200506059261	0.44106077524663	0.170941846022002	2.58018025141639	0.00987487568220316	0.143360696841841
C8orf33	2548.15283197334	0.347894227016406	0.134842812551499	2.57999829900861	0.00988008018138245	0.143360696841841
ZNF793.AS1	111.048248408667	-0.514987345759152	0.199653616630434	-2.57940404211365	0.0098970951144605	0.143531481135308
TAPBP	9211.03850462855	-0.411508808224387	0.159560142493352	-2.57902005973411	0.00990810328689121	0.143615018299293
CA6	1.76966130203357	1.60173449328521	0.621143542243469	2.57868654240533	0.00991767355598645	0.143677636068356
CLDN10	16.2572076654335	-1.08158297232131	0.419648910799109	-2.57735203044308	0.00995604978678765	0.144108569288407
RP11.551L14.4	13.5934388973065	-0.647587247564254	0.25127947014605	-2.57715939622071	0.00996160023298238	0.144108569288407
U52111.14	35.6261085454201	0.637926311874736	0.247564915132476	2.57680419510725	0.00997184201096088	0.144108569288407
ZNF763	92.0484303909298	-0.409203336560014	0.158806320956341	-2.57674464149643	0.00997356008234937	0.144108569288407
CTC.260E6.4	60.5772620464103	-0.636526816788049	0.247029099649628	-2.57672807653374	0.00997403801440418	0.144108569288407
RC3H1	1355.96300206538	0.240655368032183	0.0934081483778378	2.5763851677985	0.00998393619532732	0.144108569288407
HELLS	899.391611990179	-0.500598360251115	0.194304648665613	-2.57635812467161	0.00998471717676374	0.144108569288407
RP11.567J20.2	7.67782729955191	0.593133233584349	0.230249601945862	2.57604455587207	0.00999377673890312	0.144108569288407
ITGAL	741.491661024074	-0.830497495042114	0.322436429383785	-2.57569374722731	0.0100039209036308	0.144108569288407
AL133243.1	112.045926106106	0.463353091895823	0.179911342109758	2.57545236705058	0.0100109061031906	0.144108569288407
GLCE	1127.46801936024	0.503608655345851	0.195554664712956	2.57528326458012	0.010015802275928	0.144108569288407
RP5.968J1.1	3.20108370978789	1.17209172266707	0.455158075987133	2.57513111269106	0.010020209486265	0.144108569288407
AC010091.1	32.6464051152399	-1.98147721855543	0.769468774303949	-2.57512362388954	0.0100204264504337	0.144108569288407
RP11.231P20.2	3.85979848136812	-0.97265415161637	0.37771526303509	-2.57509888215984	0.0100211432929854	0.144108569288407
GLIS2	2409.12578632782	0.476193922224512	0.184946419594826	2.57476691502187	0.010030765801	0.144159804104392
SOST	6.28108332917648	1.60415559033251	0.623066784420991	2.57461259441591	0.0100352417897708	0.144159804104392
USO1	4367.91778404088	0.378688959816141	0.147101333196724	2.57434077303504	0.0100431301535143	0.144175297484304
AC024937.6	27.4387093963749	-0.71452654265284	0.277570933563102	-2.5742124129521	0.0100468571330325	0.144175297484304
VIPR1	160.732560249798	-1.05752555935065	0.410907034547432	-2.57363702842272	0.0100635787624332	0.144339568350496
MTX3	1925.83048899967	0.487339253271662	0.189400844470116	2.57305744668184	0.0100804474218943	0.144353808261799
CD80	29.747077967203	-0.782210485839296	0.304014514983289	-2.57293795949938	0.0100839282115011	0.144353808261799
RP11.108L7.15	27.224892801134	-0.553548422741423	0.215153112648591	-2.57281159415775	0.010087610533719	0.144353808261799
RP11.295M3.4	38.6875234226977	-0.907424858221958	0.352698096176634	-2.57280906264805	0.0100876843148688	0.144353808261799
PCSK4	161.16872449985	-0.670412910359901	0.260587573684967	-2.57269715850068	0.0100909462546525	0.144353808261799
C4orf33	354.910178865617	-0.369584221317069	0.143678021284107	-2.57230868029744	0.010102277456102	0.144440399615301
SV2B	158.222259932937	-0.983642461165007	0.382439371293362	-2.57202195955519	0.0101106478435089	0.144464586129657
RRM2	3564.89802434487	-0.650520667294979	0.252950183520921	-2.57173431637845	0.010119051364896	0.144464586129657
C17orf53	350.19307375951	-0.44668446949366	0.173696998086457	-2.57163033566834	0.0101220907008614	0.144464586129657
CDC20	3315.97214783362	-0.750902393891544	0.292008095282182	-2.57151224922689	0.0101255433303299	0.144464586129657
CD200R1	84.849338117645	-0.720480092371944	0.280211143606598	-2.57120428223747	0.010134552650394	0.144464586129657
RFC2	2197.17565376909	-0.284781234238269	0.110759523241107	-2.57116702839487	0.010135642964589	0.144464586129657
NUDT17	166.99649759269	0.450743277846765	0.17532383566147	2.57091841589125	0.0101429218212383	0.144493075773039
CHD3	13462.951770712	-0.481964294718035	0.187508793813311	-2.57035568794652	0.0101594145166751	0.144577079138567
IGKV2D.29	3.76277104411381	1.66844545470077	0.649173081483256	2.57010880809882	0.0101666577197985	0.144577079138567
NUDT15	887.861921294856	-0.331624044760749	0.129035158821349	-2.5700285704293	0.0101690128010167	0.144577079138567
C3orf62	582.357113790403	-0.293613603162872	0.114246688773541	-2.56999661272346	0.0101699509369927	0.144577079138567
FAM110C	46.735963855522	1.32995936957841	0.517705354844049	2.56895038294328	0.0102007061703559	0.144939005741413
UBE2D2	4902.33124576365	-0.202308451855623	0.0787902045886683	-2.56768532220208	0.0102380047833709	0.14534279235025
PSME1	8309.93786449238	-0.343706422529156	0.133867629095298	-2.56750959774209	0.0102431953740222	0.14534279235025
DOT1L	2678.81675296915	-0.451341093530139	0.175793762723035	-2.56744657227249	0.0102450576059209	0.14534279235025
DNAJC10	4670.47093336007	0.293199139779651	0.114208439121509	2.56722832423715	0.0102515085730666	0.145358955238622
RN7SL574P	4.07597275082975	0.794123276962386	0.309423586224254	2.56646006418802	0.0102742455492856	0.145537942760601
BBS5	420.716646052401	0.3522116072866	0.137249041966719	2.56622270173665	0.0102812794605385	0.145537942760601
HAUS5	1597.42140140932	-0.370215212726984	0.144267978062147	-2.56616345290085	0.0102830358869978	0.145537942760601
RP11.286H15.1	36.2681982318308	0.905006216743539	0.352679947334082	2.5660835655231	0.0102854045640212	0.145537942760601
CTB.31N19.3	16.3204179935608	-0.608940258126582	0.237368349014131	-2.56538102344189	0.0103062560029698	0.145737294780529
UBE2E2	1643.56792652002	0.36254593017131	0.141342759636937	2.56501239329536	0.0103172119830266	0.145737294780529
CTA.384D8.36	255.80939527735	-0.479360809909904	0.186892765910582	-2.56489761695353	0.0103206253423401	0.145737294780529
CD300LF	88.4862239678879	-0.722866383570646	0.28183112916566	-2.56489191137486	0.0103207950480401	0.145737294780529
RP5.1165K10.2	19.6562962843786	-0.508684220256997	0.198359795627596	-2.56445223008805	0.010333880320962	0.145842653464536
RP11.322E11.5	30.0113280638841	-0.764094877644644	0.297976011528917	-2.56428319086516	0.0103389149938318	0.145842653464536
STAM.AS1	24.1695357386401	-0.597863422420664	0.233169787530145	-2.56406899347271	0.0103452977954539	0.145857506167127
LINC00543	1.58015980158333	1.58672284049479	0.618950959822783	2.56356794559151	0.0103602420632465	0.145928055750794
EDN3	39.4230533592928	-2.39764369105149	0.935284902556341	-2.56354366941902	0.0103609666127236	0.145928055750794
REM2	43.6697337595778	-0.500245357622138	0.195298970142473	-2.56143366888829	0.0104241144795129	0.146691558461133
CTD.2369P2.10	22.1817387689682	-0.499992491383941	0.195208934101542	-2.56131971461849	0.0104275346164748	0.146691558461133
GJB5	8.58328344222416	0.781165725295153	0.30500120549626	2.56118897636532	0.0104314597249867	0.146691558461133
RP11.248G5.9	3.29459700667065	0.76737205108785	0.299652188034763	2.5608758478307	0.0104408660178808	0.146691558461133
KCNMA1	6182.75897668489	0.768270763067764	0.300011314710507	2.56080596096551	0.010442966429433	0.146691558461133
RP11.750B16.1	106.214615380086	1.10130678560416	0.430098851365861	2.56058992509919	0.0104494616468371	0.146691558461133
PARVA	9111.15160548074	0.461009920719258	0.180068054008581	2.5601982720227	0.0104612460412863	0.146691558461133
RP11.707M3.3	17.8003412660984	-0.601307218327473	0.234882410270762	-2.5600351155896	0.0104661587200369	0.146691558461133
NCR3	24.2062281081065	-0.994650084195966	0.388541511581197	-2.55995834305623	0.0104684710691949	0.146691558461133
MCM2	6365.57863161618	-0.497169987545178	0.194213241199202	-2.55991808012327	0.0104696839496746	0.146691558461133
ZNF491	157.043497606738	-0.520436900039119	0.203318376115578	-2.55971403068492	0.0104758326568698	0.146691558461133
MDS2	3.85926156680046	-0.87502699514	0.341861853712818	-2.55959237813959	0.0104794999923816	0.146691558461133
KMO	40.0495615570419	-0.746360263222991	0.291640605413035	-2.55917814381835	0.0104919960604091	0.146727859189616
XRCC3	1026.87212713701	-0.416045314655626	0.162571619100859	-2.5591509573237	0.0104928166496411	0.146727859189616
TRGC2	40.1088829621734	-1.00836061042445	0.394107522599928	-2.55859264946859	0.0105096810816323	0.146773413480578
ATOH8	564.958143173314	0.851675525156261	0.332869453263038	2.55858720831093	0.010509845557615	0.146773413480578
ZP1	20.6576656381889	1.29936043317542	0.507859162960723	2.55850544391165	0.0105123174176795	0.146773413480578
GLIS2.AS1	11.1751811823396	-0.86182970849374	0.336871571067653	-2.55833315278677	0.0105175277291315	0.146773413480578
KB.1836B5.4	9.95121372620075	-0.63468049021819	0.24810862056732	-2.55807512357669	0.0105253351701235	0.14680750370316
PCP2	7.13505726482853	-0.81971927731864	0.320564193478191	-2.55711428161863	0.0105544536630727	0.14710884773263
RP11.109N23.6	8.19267277883431	-0.767693994098083	0.300231409200017	-2.55700759671896	0.0105576911842025	0.14710884773263
TAB2	4118.67091262432	0.288967653655089	0.113023769650681	2.55669806933703	0.0105670892793447	0.147126324759525
KCTD19	71.1101317774346	-0.908398613604718	0.35531341641566	-2.55661219542027	0.0105696979637955	0.147126324759525
DNAJC25	536.157262607963	0.295307115369642	0.115562287166739	2.55539348181607	0.0106067819372125	0.14756746034253
UBE2D3P2	4.67641649793356	0.511829708980909	0.200364563021927	2.55449217796511	0.0106342819052028	0.147849681017933
TMEM61	77.4400597399602	1.85734672298837	0.72712384829662	2.55437464654673	0.0106378726128886	0.147849681017933
FAM83H.AS1	11.0378775531886	1.06706366894575	0.41792775466593	2.55322518553167	0.0106730467254944	0.148223231895371
EMC3.AS1	266.609524873349	-0.553486061974048	0.216794138462535	-2.55304901645068	0.010678446722222	0.148223231895371
ATPIF1	3453.73808069439	-0.393596225324149	0.15417215053457	-2.55296578506177	0.0106809988050015	0.148223231895371
IGKV1.5	345.047860869163	-1.55586289075995	0.609512693757834	-2.55263410703979	0.0106911742714754	0.148289242328026
NCAPH	815.247191316828	-0.644154955322713	0.252383904937896	-2.55228222846152	0.0107019788879564	0.148317649760382
HOXD1	22.7890642133385	0.82640317221967	0.323798488004472	2.55221442605457	0.0107040619117428	0.148317649760382
NDUFAB1	2495.74589195599	-0.31368913823931	0.122927716227392	-2.55181783137536	0.010716253306107	0.148331883628172
TNFSF13B	304.471216748891	-0.734164418106386	0.28771704072183	-2.55168903539568	0.0107202151734219	0.148331883628172
RP11.245D16.4	53.762528732673	-0.545671051284446	0.213850093736099	-2.55165214918179	0.0107213500627247	0.148331883628172
RP11.932O9.9	8.75924250340027	-0.710499680047069	0.278537347105544	-2.55082374923979	0.0107468658489336	0.148609767974692
PRTFDC1	1134.23267264222	-0.575835338950447	0.22576757269661	-2.55056708132423	0.0107547824994652	0.148644130242609
MAPK12	1535.63338827623	-0.563146704550385	0.220809972273752	-2.55036807781588	0.0107609241202188	0.148653937139781
RP11.621L6.2	3.49823165559025	-0.832108574572312	0.326314481555033	-2.55002036871593	0.0107716625577517	0.148705276892345
HCLS1	2654.01124933421	-0.720849122719454	0.282717659378424	-2.5497138180342	0.0107811377843877	0.148705276892345
XRCC2	324.325463653792	-0.498794193394352	0.195630530489468	-2.54967459397247	0.0107823507020567	0.148705276892345
CALR	48208.1031213172	-0.470678971950464	0.184623447575439	-2.5493997546446	0.0107908529060881	0.148705276892345
RP11.506K6.4	14.1150794643633	0.847815557816346	0.33256623062736	2.54931342913864	0.0107935246308368	0.148705276892345
RP11.23D24.2	5.30902751115188	-1.15696385237829	0.45385489688587	-2.54919327810894	0.010797244214905	0.148705276892345
PSMB3	5853.18491708516	-0.444006527022115	0.174193546395547	-2.54892638797247	0.0108055105623423	0.148744266624275
FAM201A	99.5691536040424	-1.3340311165572	0.523407358767016	-2.54874352492819	0.0108111775988432	0.148747454082424
UBE2H	7756.0175083202	0.303297520146183	0.119012663784952	2.54844745508949	0.0108203585843232	0.148748597181791
CTD.2530H12.4	12.2360511297476	0.559460384246547	0.219534859130452	2.54838974758949	0.0108221488734174	0.148748597181791
ZBP1	59.0048208901785	-0.966259430519014	0.379190678765311	-2.54821514512241	0.0108275672581352	0.148748597181791
CCL16	10.1616864739527	1.07644789261854	0.422589531255431	2.54726587622894	0.0108570678433561	0.148972484435655
KCNJ5	294.362894420182	-0.713447437779182	0.280084028556824	-2.54726212506772	0.0108571845603831	0.148972484435655
NUP43	2117.9763620806	-0.27683608008557	0.108683983768376	-2.54716537328585	0.0108601953683085	0.148972484435655
WDFY3	2160.93805045303	0.323857833298315	0.127167080467945	2.54671124088556	0.0108743373826964	0.14906877033201
DYNLRB1	6955.13361902259	-0.420545014616785	0.165140434815371	-2.54659021024718	0.0108781091263986	0.14906877033201
GRIK2	116.166963583704	1.27183158528151	0.499548155358895	2.54596393088026	0.010897644792417	0.149193546774012
HNRNPDL	10335.6347104054	0.205508222749202	0.0807197007222694	2.54594876975931	0.0108981181028009	0.149193546774012
[truncated: 25,367 more rows]
