# Supplementary material for: Identification of Subtype-Specific Metastasis-Related Genetic Signatures in Sarcoma
Source: Front Oncol. 2020 Oct 6;10:544956. doi: 10.3389/fonc.2020.544956 (PMC7573283; doi:10.3389/fonc.2020.544956)
Supplement: Supplementary file 3 [file Table_3.XLS]

TransID	baseMean	log2FoldChange	lfcSE	stat	pvalue	padj
KRT75	923.148232383168	7.29979770886663	1.08642776130575	6.7190824543117	1.82872412120102e-11	4.46739015568198e-07
WSCD2	121.788742548239	4.73088488575185	0.785170853679112	6.0252935569171	1.68802956317403e-09	2.06184370993892e-05
KIAA2022	117.033721391462	5.27391412289267	0.887334078861456	5.94354961511189	2.78915278288571e-09	2.27120711110383e-05
MMP9	63129.2320137976	4.87767156286081	0.87217637848326	5.59252885447691	2.23785948490381e-08	0.000114198186724173
RAP1GAP	297.10844154582	4.22879583562889	0.757173742591651	5.5849742242178	2.33734878063313e-08	0.000114198186724173
TRHDE.AS1	24.0803080577716	5.5323539518862	1.00010417813058	5.5317776616306	3.17001565329947e-08	0.000129067187324088
LYPD6B	245.730496382922	5.42362371142461	0.992877696222136	5.46252950596161	4.69397482725891e-08	0.000146081157877474
NTSR1	62.3137763262111	4.46104141967862	0.817165911873773	5.45916239879536	4.78386042416714e-08	0.000146081157877474
KCTD8	28.3255997577407	5.36052471507726	0.99231645713074	5.4020314553455	6.58903919521681e-08	0.000178848487222168
TMEFF2	436.919630168881	-3.61666396176274	0.674798742904388	-5.35961870082378	8.33977832929493e-08	0.000203732444806346
PROK1	43.2496729250974	5.20055720927402	0.982713986776427	5.29203540323393	1.20962467610587e-07	0.000268635647387185
DUOX2	104.53702584532	3.65794483399698	0.693733713939226	5.27283705620429	1.34330821480341e-07	0.000273463969828605
DPYSL5	100.132108488909	5.27013545907751	1.01238359135623	5.20567056210127	1.93297307316362e-07	0.000363235378494724
BEX1	72.4484405065418	3.60577214499367	0.69632937495405	5.17825654738695	2.23969099987532e-07	0.000365017975144557
IGFBPL1	22.3783728763658	5.27751201053848	1.01919409869295	5.17812261404042	2.24129912283284e-07	0.000365017975144557
KIF1A	64.2962736909282	4.25691515829453	0.834083690701844	5.10370266886831	3.33071447148411e-07	0.000508537648899283
MYH14	321.077585533132	4.24853185863479	0.846815096547764	5.01707146690571	5.24650554594715e-07	0.000753922846952605
TRHDE	38.4440545569102	4.1602675908579	0.834434515963834	4.98573286611051	6.17273825816878e-07	0.000837743460604473
FCER2	47.2456457238973	3.26237021987409	0.667037177411766	4.89083716822609	1.00408003496555e-06	0.00122308334119102
NEURL3	89.5415967808527	3.06704688012016	0.627453906546718	4.88808316932808	1.0182251604143e-06	0.00122308334119102
CAPN6	987.619243891987	5.14129321337857	1.05316274208613	4.88176518967485	1.0514040756892e-06	0.00122308334119102
FAM228A	44.8039156877132	3.49280923193018	0.721885891402739	4.83845061044634	1.30855202992115e-06	0.00145302806995199
ZDHHC8P1	22.7053153531496	4.86651287473036	1.01173360835189	4.810073357806	1.50874913719613e-06	0.00160248837706802
CLEC4G	790.729330625334	4.05250269352331	0.85705719445024	4.72839236373576	2.26304542008119e-06	0.00230349735696514
F5	366.207887269713	3.7958934699681	0.816709788699068	4.64778740562735	3.35514438000029e-06	0.00327851288236108
PNMA3	172.983982598624	3.5392119893848	0.767278054049026	4.61268502429845	3.97500431763927e-06	0.00363603162100702
SYCE1	50.6220142109729	5.28909593445765	1.14776735320743	4.60816028586045	4.06247447943503e-06	0.00363603162100702
CYP4F11	16.4738832737337	3.57574637770774	0.776855347557376	4.6028470923844	4.16754207655641e-06	0.00363603162100702
CALCA	13.1297304639276	4.20546439416977	0.916781713514953	4.58720361911013	4.49222499421128e-06	0.00378415739253749
BRINP1	31.5310922713983	3.92566006159538	0.859370157416541	4.56806654003066	4.92243780094107e-06	0.00400834110130631
ALDH1A2	267.916764323259	2.3942826387488	0.525729539620718	4.55420983282799	5.25828498581668e-06	0.0040498780804003
FAM180B	207.837019914938	3.47057980962433	0.762371121316981	4.55234952188243	5.30501037999139e-06	0.0040498780804003
HSD3B2	17.147855770416	4.13257629751361	0.90911250352961	4.54572594862459	5.47462315382034e-06	0.004052714212869
RP11.10A14.5	12.3072259852287	4.17751909032429	0.920476094496481	4.53843300798537	5.66737942733873e-06	0.00407201211854288
LBP	429.322810832852	3.88790460537088	0.858223519866354	4.53017718038806	5.89342412035929e-06	0.00411344165246449
PNPLA3	69.5402449094484	-2.79223577317123	0.621238944149303	-4.494624491056	6.96928215859205e-06	0.00468513993848529
CYP4B1	92.8049693198308	4.59339487598712	1.02284875362124	4.49078601281459	7.09608161299913e-06	0.00468513993848529
MAOA	1104.01275196479	2.94130467451902	0.656702228045906	4.47890162223329	7.50280994565494e-06	0.00474503914793823
UNC13C	7.97197673907765	3.62599381974392	0.809943301149461	4.47684895300443	7.57528047687548e-06	0.00474503914793823
ALB	202.862033668907	-3.26173314837206	0.730543426578572	-4.46480391131306	8.014211638063e-06	0.00482853261818956
ROBO2	82.2691350621853	3.51549078464032	0.78857400215957	4.45803535877784	8.27142603577106e-06	0.00482853261818956
UTS2	54.8657203470505	3.59512580748073	0.806578253283208	4.45725606021069	8.30154201825542e-06	0.00482853261818956
SPINK1	92.1435191720221	3.21376821378145	0.722591062140659	4.44756153537346	8.6850583259948e-06	0.00485200267628931
MYO3A	21.7932472335695	4.94465440727818	1.11210099723742	4.44622783322849	8.73912635624585e-06	0.00485200267628931
TNR	70.6060073432163	4.399840453587	0.995287935793426	4.42067093888717	9.83949136466321e-06	0.00534153187883017
OR7E22P	2.55360826331421	3.20405122269678	0.725254742421511	4.41782870939796	9.96973798253275e-06	NA
CMA1	82.7462448571007	3.70397474716313	0.840105352324702	4.40894077976489	1.03877422774499e-05	0.00551656861077876
RP5.857K21.11	63.914632920162	-1.93716947343803	0.441123182349056	-4.39144790151873	1.12598317511667e-05	0.00580618257311878
PVRL4	367.304949627815	2.80864742154591	0.639987585337341	4.38859672577158	1.14084392938598e-05	0.00580618257311878
RUFY4	322.362479014402	3.50842757787186	0.802531721971166	4.37169956254753	1.23283093404884e-05	0.00614629120160798
RAB6C.AS1	15.8101158411244	4.33776085956852	0.993877075621869	4.36448426668297	1.27423019554031e-05	0.00622563388937087
GRIK1	160.81947287216	3.15955296477991	0.725445571146408	4.35532738836207	1.32868183409495e-05	0.0063643859853148
TMEM132C	104.776661373285	4.59196858762005	1.05599935805041	4.34845774537001	1.37098225632797e-05	0.00644071644996848
SORCS3	28.6727935222031	5.64938627717818	1.30495177374083	4.32919161524521	1.49657677532609e-05	0.00689808944234738
KIF6	28.1812344610628	2.65982954859481	0.617538703810728	4.30714630869521	1.65374230046207e-05	0.00748134641814589
AC005682.5	113.392023651619	-1.33725979535431	0.311023636036572	-4.29954395876544	1.71149927022e-05	0.00760185739494624
CHI3L2	325.621156843605	2.53301624416128	0.5901223310666	4.29235789058016	1.76785695872064e-05	0.00771196029367615
RABL2B	620.032053538622	-0.997790456324496	0.232860950937991	-4.28491961535534	1.82805272533351e-05	0.00783464912757409
CHI3L1	5397.20857026456	3.94941616193665	0.925325679082395	4.26813634509	1.97112841682266e-05	0.00830218898182083
CLCA2	247.43297564614	3.33233601823735	0.783852997887084	4.25122571096856	2.12603772246648e-05	0.00880287720714131
CSPP1	514.879099972301	-0.839484228460767	0.198367741006877	-4.23195941134232	2.31664222069237e-05	0.00943220880154899
CCNB3	56.0669492788343	-2.43337946812959	0.576511149537572	-4.22087147851596	2.43359662102792e-05	0.00960225891014379
CADM3	3148.08060876943	4.07868195851728	0.966385341848686	4.22055445368697	2.43702178733847e-05	0.00960225891014379
NPY	14.8595639583121	4.52019323284404	1.07306909511054	4.21239718247446	2.52674739162894e-05	0.00979776381430214
CNTNAP2	169.19565782241	3.66540628676429	0.872061839810801	4.203149500911	2.63226610009546e-05	0.00990469542436324
PCSK2	32.8055853382801	4.53290986904394	1.07852492618201	4.20287909811275	2.63541365828978e-05	0.00990469542436324
NUDT10	76.2284515006208	3.1466675010534	0.750772752229642	4.19123828310023	2.77436093472889e-05	0.0102689186779533
SP6	430.358739098129	2.72905085595172	0.65231321807769	4.18365101353304	2.86864377624154e-05	0.0104594177328066
SCN5A	109.565540169349	2.6541109663985	0.635208103742041	4.17833297585941	2.93653527878722e-05	0.0105495029890431
VPREB3	10.7965758612801	2.67409004543835	0.640612461870519	4.17427103686104	2.98941694141763e-05	0.0105838357191147
C10orf105	33.0504275799995	2.70714400036753	0.650425794219503	4.16211045814387	3.15319748990746e-05	0.0110042087829928
RP11.7K24.3	96.0382005867083	2.87759394610873	0.692160921215371	4.15740597006826	3.21881692442099e-05	0.0110049709284445
NOTUM	212.716668763775	3.27556281942771	0.788217429445114	4.15565895533879	3.24351347516478e-05	0.0110049709284445
CXCR1	37.2859043482883	3.05902977858824	0.737426733377938	4.14824909394824	3.35027759186746e-05	0.0112114974372233
SH3GL2	78.6370160203263	2.96507706837972	0.71628301044787	4.1395328733621	3.48013731130938e-05	0.0114886857267536
DLX6	29.6415526691077	3.2634974497413	0.789152298456706	4.13544692972891	3.54264481967643e-05	0.0115391027066501
RP11.1016B18.1	16.8229729929333	4.26436565604158	1.03473719893509	4.12120648646852	3.76893428362722e-05	0.0121146441598328
C1QTNF4	30.5457302870088	2.14501785967764	0.521264506487616	4.1150276548296	3.87132997070553e-05	0.0122821714096579
KIAA1429	3142.85791376563	-0.547312057166216	0.133322562197231	-4.10517205899889	4.04014057715352e-05	0.0125015590821027
GALNT14	216.379743411773	2.264719857034	0.551695451813998	4.1050181754943	4.04283092834793e-05	0.0125015590821027
RBM11	10.9767235643359	4.21965144246179	1.03039332604652	4.09518514512512	4.21831146946739e-05	0.0128811413609524
CD300LG	92.848143427805	3.26128412265126	0.798721986081044	4.08312802136931	4.44335283325256e-05	0.0133312841110395
BPIFB4	223.551532695144	4.57310585807768	1.12045119009501	4.08148601072921	4.47486715422341e-05	0.0133312841110395
DUOXA2	11.9963098702399	3.60556865710878	0.884817786046628	4.07492787098967	4.6028611282937e-05	0.0134044040464893
KCND3	106.764015233335	2.7556829822239	0.676660872861745	4.07247277438922	4.65166389364727e-05	0.0134044040464893
BAI3	32.0014908399536	2.84698811794704	0.699187030561248	4.07185487359758	4.66402367657943e-05	0.0134044040464893
FAM110C	22.5630995563851	3.06645908888256	0.754050546681905	4.0666492483509	4.76939445267367e-05	0.0135478531493448
MDGA2	28.5759387181359	4.1812754992589	1.02986775971808	4.06001203533502	4.90701865219882e-05	0.0137785699602948
SLC1A6	12.1489704943325	4.57783267163932	1.12852835742218	4.05646224264682	4.98216121152197e-05	0.0138305927541216
RP11.697E2.6	6.54359969978401	1.14064082548937	0.28337313292796	4.02522572871913	5.69206883265719e-05	0.0152115753327382
DACH2	8.80203007247606	4.32340245387972	1.07410010177799	4.02513922745476	5.6941616075348e-05	0.0152115753327382
HS3ST4	23.6340134770088	4.75122782584675	1.18078419924712	4.02379014630802	5.72689517192459e-05	0.0152115753327382
WNT10A	223.068434644764	3.23850690558842	0.804854774852181	4.02371583890175	5.7287033059557e-05	0.0152115753327382
MAOB	444.551985691377	2.87304561528208	0.714606003179316	4.02046106875644	5.80843480306326e-05	0.0152374481381518
GLP2R	11.4686832400327	2.17720134596352	0.541828238053143	4.01825005242708	5.86319589416786e-05	0.0152374481381518
RP11.465L10.10	83.4764978232513	2.59307715948795	0.646288942719848	4.01225672928153	6.01410427289351e-05	0.0154651108718437
RP11.589P10.5	88.3081330564315	1.31174107268305	0.32780136203936	4.00163399115328	6.29065552090049e-05	0.0160077524708415
TRABD2A	346.790902172136	1.74032515673341	0.435805583782185	3.99335213108058	6.51457110531897e-05	0.016406645106375
COL6A4P2	24.2365498578588	2.68413896664861	0.672603568076625	3.99067012731461	6.58868672856474e-05	0.0164239824583784
CRTAC1	739.204067091248	3.45185610017418	0.869539123341138	3.96975364019353	7.19469827278492e-05	0.0176850188743088
TSEN2	382.141477222363	-0.650987666760175	0.164047856445297	-3.96827901849027	7.23935440431817e-05	0.0176850188743088
PRIMA1	60.6361723749251	4.329453276408	1.09350298623247	3.95925144322156	7.51850474065196e-05	0.0181584261263264
LRAT	18.8099540511456	3.80004972107424	0.960275750559062	3.95724844541987	7.58180631579389e-05	0.0181584261263264
LINC01085	60.2872899132408	-2.94354490227165	0.745270198104979	-3.94963452148803	7.8270612790328e-05	0.0185460878950742
D4S234E	26.6653878399308	2.19313825616375	0.555569480266629	3.94754991780905	7.89550591955349e-05	0.0185460878950742
RP11.86K22.2	8.19383114652957	3.49294700169935	0.885432549972892	3.94490467038544	7.98317313800119e-05	0.0185734225322125
AC131056.3	23.9299975120497	2.76851647905539	0.70385367951775	3.93336933459274	8.37633816360889e-05	0.0191703760232103
LRRC74B	8.58593558531001	-2.96964219094762	0.755098868187006	-3.93278591196639	8.39670160253591e-05	0.0191703760232103
CTC.251I16.1	534.760291044797	2.0715946679318	0.527916560180041	3.9240948744349	8.70564247253708e-05	0.0196916796260748
MPO	95.6394582304755	2.79070383411443	0.712848652661676	3.91486162412504	9.0456070366315e-05	0.0202473653809746
ZBED4	1216.92138078798	-0.949539610499428	0.242665152789657	-3.91296236638679	9.11707475503378e-05	0.0202473653809746
PITPNB	3992.43723056894	-0.582367015285393	0.149339087360275	-3.89962886193656	9.63402520148317e-05	0.0211016636114921
SBK1	200.422312107785	2.32928937141683	0.598068424774905	3.89468708750759	9.83255771285166e-05	0.0211016636114921
ARFGEF1	2062.19290813097	-0.682759300100292	0.175336274420731	-3.89399913027676	9.860500291986e-05	0.0211016636114921
DNAH2	91.2612624093726	2.83718160155049	0.728771835684453	3.89309995615548	9.89713484940171e-05	0.0211016636114921
PCSK1N	109.193631000941	3.12095242494554	0.802289293127815	3.89005867544132	0.000100219986430165	0.0211016636114921
CNTNAP4	15.9695675214913	4.29497229734826	1.1041352104067	3.88989704962515	0.000100286758437651	0.0211016636114921
PRKCZ	228.764258541902	2.39430333199737	0.615815129618674	3.88802290953775	0.000101064089506102	0.0211016636114921
MYH16	12.0885000205111	2.48905207113977	0.6424407727724	3.87436815443464	0.000106901700419014	0.0218458227873593
POU3F3	56.1187961136714	3.58824287834408	0.926257217469839	3.87391624126364	0.000107100235382437	0.0218458227873593
SMPD1	4376.1867090807	0.935040500153656	0.241398111485014	3.87343751117831	0.000107310931044378	0.0218458227873593
CDK18	553.218471928473	1.70780040658742	0.441578277754321	3.8674918867671	0.000109960485726878	0.0221538170727285
GIPR	68.9779697124549	2.39348669218046	0.619112859335498	3.86599414967639	0.000110637589867488	0.0221538170727285
SNHG4	28.1894408390346	-1.22236923746749	0.318996526337888	-3.83192021399234	0.000127146977057556	0.0252526301019434
GJB6	21.9666508878397	4.39123957183057	1.14687003935878	3.82889030241451	0.000128722363136781	0.0253593436215195
GLI1	338.213843722085	2.4087306186973	0.630969919405805	3.81750467750609	0.000134808232202594	0.0263458424358173
SERTM1	17.3438962974192	5.71187110890332	1.49875227557467	3.8110841944932	0.000138358629549964	0.0266081563943877
GRIA2	6.52473355630929	3.80698606764641	0.9992510739603	3.80983935554685	0.000139057116691597	0.0266081563943877
BCL11A	101.29732192456	2.36952158363158	0.622052555598471	3.80919837448764	0.000139418069445398	0.0266081563943877
PAIP2B	144.932181061628	1.709520823247	0.449131024802308	3.80628531284266	0.000141069636166036	0.0267146522627914
RPL23AP82	525.109856698032	-1.17807227649326	0.309750619378041	-3.80329272257389	0.000142785468936857	0.0268315863127575
RP3.333A15.1	37.6000819104122	3.37339772270847	0.888061423973522	3.79860855526706	0.000145510695328679	0.027134967757132
RP11.524N5.1	6.643130865066	3.46337932148	0.912277834196217	3.79640849712357	0.000146807515075508	0.0271693998922696
CTSE	3.66427558653016	3.32284513850913	0.875870407721917	3.79376344858098	0.00014838104031922	0.0272138230909003
TMSB4XP8	424.096516433715	1.72984789585511	0.456150849730554	3.79227156296414	0.000149275545220051	0.0272138230909003
CAMP	8.3234456532752	4.63008718087304	1.22301113679646	3.78580950047687	0.00015320901380372	0.0275538653020806
PRKRIR	2508.89451962262	-0.955549931012642	0.252423354900621	-3.78550523341567	0.000153396605717916	0.0275538653020806
KIAA0040	1693.60408846764	1.78998862238373	0.473595295481125	3.77957433163538	0.00015709669185491	0.0280125188709752
RP11.35O15.1	3.11904439769755	3.13792381889606	0.831060880498613	3.77580498917648	0.00015949173865083	0.0281258892993096
ESF1	820.438062522916	-0.759712510842404	0.201250629714027	-3.77495718608155	0.000160035147267757	0.0281258892993096
CTGF	18868.0403426299	-1.88026765593295	0.498832178620446	-3.76933914153846	0.00016368035770265	0.0285610532737003
MAPK4	35.638969298347	4.06601405359342	1.08097689885282	3.76142548273552	0.00016894775602568	0.0292710973897258
GFRA1	2069.26318033238	3.3187808271256	0.886445485955472	3.74391982327982	0.000181171486346236	0.031001360933217
IMPA1	685.938792689554	-0.729700890950845	0.194924630940965	-3.74350274477032	0.000181472619159607	0.031001360933217
RAB11FIP4	361.29855753454	1.97288521759009	0.528170921671165	3.73531585447332	0.000187479726709966	0.031152685307095
ATR	956.49665676224	-0.618490475008678	0.165705276751289	-3.73247302158629	0.000189609010123695	0.031152685307095
NANP	470.868980680616	-0.626077150016667	0.167797905339957	-3.73113805412672	0.000190616725249793	0.031152685307095
GRIK2	206.689750721353	3.18977847298471	0.854966276333632	3.7308822128792	0.000190810423740536	0.031152685307095
IL36RN	33.789330531411	3.47933956251818	0.932821740523887	3.72990831084632	0.000191549462780934	0.031152685307095
HYAL1	552.158891397828	2.27350775516275	0.609649380352662	3.72920538990394	0.000192084540213406	0.031152685307095
SLC30A2	14.6131058343667	2.45645722593643	0.658902155757632	3.72810622103959	0.000192924065933431	0.031152685307095
LINC00925	75.037163867129	2.16086500933333	0.579680736505607	3.72768124460943	0.000193249578767852	0.031152685307095
ACTA1	51.8578407879982	-1.92672619074811	0.516975747901251	-3.72691794261137	0.000193835530176366	0.031152685307095
TERT	14.8373482448869	-3.4318911147253	0.92181350608921	-3.72297768697824	0.000196886927872124	0.0314362794835824
CLDN1	590.861353920406	2.55241489619319	0.68601920487355	3.72061726269553	0.000198736436637707	0.0315255351339127
PCDHGB5	246.845174835983	-2.53651993630937	0.682169563827784	-3.71831296910474	0.000200557700250461	0.0316002298230736
TNNT2	123.976870145627	-3.24296466788839	0.872707691200288	-3.71598039135892	0.000202417281068347	0.0316002298230736
PCDHB5	148.658552474792	2.16379784649669	0.582426366775896	3.71514404211248	0.000203087972582691	0.0316002298230736
CLLU1OS	3.14224266472581	3.02710677426103	0.815529240427795	3.71183107140724	0.00020576530287731	0.0318141809113279
NKX2.8	10.6783396110134	3.59726359897155	0.970196413090022	3.70776839662235	0.000209093754577262	0.0321254800664649
GLIS3.AS1	10.9729289526247	2.42339815748427	0.654023024096801	3.70537132210439	0.00021108127125331	0.0322281523465444
RP3.473L9.4	10.826573533807	1.66485463856967	0.449697280989977	3.70216745563728	0.000213765447477337	0.0324352553815146
GPR150	78.7636199366241	1.95227644358194	0.528360141672517	3.69497297317326	0.000219910177847101	0.0331616403372026
ZNF337.AS1	38.5436690413961	-0.979159705339603	0.265115232512268	-3.69333627517722	0.000221331030199063	0.033171139489159
CAMSAP3	19.1290173217826	2.33092560652156	0.632524641288365	3.68511430918136	0.000228600018856333	0.0340516454917156
EPYC	356.316047714745	3.30388300389644	0.898400571434291	3.67751658775307	0.000235515764514898	0.034869179462633
PAGE2B	330.063506630821	4.78500651932193	1.30177315559114	3.67576063369431	0.00023714179560254	0.0348984152094847
DACT2	151.203409274792	3.66330183279562	0.99765567583623	3.67190998008913	0.00024074448858887	0.0351403971865467
PDE1C	529.256905360893	2.16223116138177	0.58920932030074	3.66971649443383	0.000242819617790852	0.0351403971865467
FAM132A	58.9887882295973	1.58553450061783	0.432094052422676	3.66941986756821	0.000243101523784289	0.0351403971865467
CKB	9977.43903587466	2.1143319762067	0.576555582303021	3.66717805031236	0.000245242035073299	0.0352412804400331
RAB3B	351.130528643122	-2.59444323002789	0.710644317202762	-3.65083230418296	0.000261391874059072	0.0371227123238243
WBP2	6620.39392445519	0.505512472251523	0.138533757814265	3.64902013940368	0.000263242468748864	0.0371227123238243
FAM150B	22.1093588228999	2.78304083633414	0.762787271990246	3.648515042828	0.000263760461495847	0.0371227123238243
TSR1	2575.4371375991	-0.8043642180589	0.220501842578794	-3.64787980296115	0.000264413277020976	0.0371227123238243
CARD14	57.0960567663496	1.31376320719595	0.360479504323268	3.64448794297555	0.000267924694659061	0.0374007563761497
UTP23	925.861515259784	-0.610564380124343	0.167663180079926	-3.64161278483018	0.000270935380346877	0.0375321839894749
AMZ1	59.818330240739	1.63620796742789	0.449426064960578	3.64066104526316	0.000271938948222893	0.0375321839894749
ZEB1	3316.78183803536	-1.07382538931284	0.295076178626994	-3.63914631912818	0.000273543349006181	0.0375415195105169
HS6ST3	10.7674044785867	3.15253886920206	0.868707787127524	3.62899805425513	0.000284523385047725	0.0387302095953198
PLA2G1B	7.21566054349195	2.32709569982858	0.641442079114944	3.62791244228861	0.00028572211740779	0.0387302095953198
PLP1	174.385077189486	2.79507341905427	0.770673113899561	3.6267950297518	0.000286960904529571	0.0387302095953198
RP11.747H7.3	25.0534131144397	2.62529574304144	0.724367971022979	3.62425707383763	0.000289793254112249	0.0387438039788745
PTCHD2	42.1312250315396	2.35230560232878	0.649115201423612	3.62386460395597	0.000290233580094725	0.0387438039788745
STAB2	27.589830437807	-2.01224122085202	0.555753815747187	-3.62074206930393	0.000293759259581303	0.0390013312625633
FAM69C	46.6218118391845	3.11035587461915	0.861021663610506	3.6124014134285	0.000303374459922396	0.040060187467266
CTD.3088G3.8	87.6246258928752	1.27709004722751	0.354100645371801	3.60657362227223	0.000310266856993916	0.0404855696098808
LPAR2	365.368592061563	1.09061258182907	0.302497730379763	3.60535789957791	0.000311723025741511	0.0404855696098808
GRM7	12.9468070714111	3.27355475211034	0.907996809876701	3.60524917764289	0.000311853561956449	0.0404855696098808
F2RL2	85.4325822196495	-2.19819795943819	0.609914306401448	-3.60410952221758	0.000313224964438473	0.0404855696098808
OTUD6B	476.320503633141	-0.669838606314399	0.185926470905802	-3.60270704354823	0.000314920384325729	0.0404904740457539
RP11.347C12.1	4.48548046546178	1.62122740815406	0.450557611773242	3.59826882465366	0.000320342413921609	0.0409719624591151
SCN3A	28.8312530008219	-2.35041243193839	0.653940812537939	-3.59422808130978	0.000325354735756374	0.0412327926908907
DLX6.AS1	32.8198241453942	3.25282084318645	0.905093479023869	3.59390595399557	0.000325757459959143	0.0412327926908907
AC108448.2	14.7385801372585	1.59742851541244	0.445191213292361	3.5881851836177	0.000332987752422081	0.0419307103294795
PRKRIRP7	7.39444506451814	-1.75772938320877	0.490161429932372	-3.5860214122749	0.000335761401743253	0.0419997647447271
AC093390.1	7.8421771000802	3.86022051432268	1.07674593468409	3.58508018463544	0.000336974656759037	0.0419997647447271
ASIC2	7.81714490982303	2.85891069169711	0.797975150309733	3.5827064170951	0.000340052716621071	0.0421108496476281
DLK1	281.71773679045	3.62504179689561	1.01208962917016	3.58173988984342	0.000341313530239893	0.0421108496476281
SLC22A17	1635.35721899308	1.65662740170972	0.463009600120429	3.57795475791177	0.000346293372875547	0.0422584118102983
KY	11.6804253808039	-2.55217785446513	0.713608940507476	-3.57643761112378	0.000348308395138831	0.0422584118102983
CCNA1	50.2624569545294	2.70488690726089	0.756399639509463	3.57600237490205	0.000348888482214275	0.0422584118102983
COX6A2	7.61110003587319	-2.98374661791122	0.83447497203253	-3.57559749292865	0.000349428924052571	0.0422584118102983
AC093668.2	12.5429981486471	1.40996730819397	0.395197451711961	3.56775404822606	0.000360054227464051	0.043328890259701
OGDHL	76.6464629788971	3.14635890868828	0.883699814645706	3.56043857489064	0.000370235912303753	0.0440215796527671
DPP10	4.84709891777407	4.17884448000953	1.17390705024651	3.5597745827764	0.000371173260656551	0.0440215796527671
FOXI2	7.13657452369646	2.10231315988865	0.590579862747449	3.55974406257001	0.000371216398889436	0.0440215796527671
RP11.417L19.2	11.3348012336222	2.11690452496022	0.595269597126669	3.55621139594293	0.000376241372650426	0.0444019347462669
ATP6V0A1	3019.3996749076	0.651362251769474	0.183432612079273	3.55096209112467	0.000383825697193092	0.0450792209458176
SEL1L2	7.39570454090538	3.97542078305246	1.1202555329049	3.54867319668034	0.000387177280060268	0.0452552812181449
SPINK6	22.5338146565753	3.09080145044246	0.872463438167909	3.54261429789293	0.000396181694046808	0.0460872504946165
IFI6	13474.3831760451	1.50070836557652	0.423821492461954	3.54089726988359	0.000398768808704142	0.0461683565300165
COL13A1	694.341235966987	-2.12739269801318	0.601390824159533	-3.53745453463858	0.000404003735546804	0.0465379591760174
CDK5	1339.85943123502	0.894623568344594	0.252982828108862	3.53630155466372	0.00040577122700445	0.0465379591760174
DNAJC6	135.362649714269	-1.99444174807738	0.564444609106189	-3.53345875910769	0.000410160075338198	0.0468214975721348
RP11.750B16.1	48.7535838893909	1.96945003317502	0.557819832623749	3.53062031500665	0.000414586411468397	0.0470335900010101
COL20A1	10.5050773374408	2.42483395707494	0.68696007114499	3.52980334509596	0.000415868657751778	0.0470335900010101
NUP50	3055.99997620737	-0.650682594416062	0.184417092448795	-3.52832042722249	0.000418205586953685	0.047073814172406
KIRREL2	33.1705852784112	2.37191529752054	0.672475958101118	3.52713769012376	0.000420078246738897	0.047073814172406
SNRPN	1917.49591219967	1.07606460007093	0.305222191576094	3.52551233091667	0.000422664499420618	0.0471473564216725
TMEM67	371.459867743027	-0.690136644961383	0.195870352921135	-3.52343595990385	0.0004259900280305	0.0473023199761685
COL4A4	150.425273550625	2.38605295738544	0.677796141377878	3.52031062398036	0.000431041676391474	0.047646683767273
RP11.248M19.1	7.10396811428029	1.37327625273894	0.390380051139716	3.51779310630668	0.000435151488384469	0.0478843049988477
COL2A1	49.0347778862338	2.55456197962793	0.726795183327026	3.51483064036555	0.000440034516273311	0.0482044986459225
MATK	590.714322086244	2.01581618618472	0.573891409175704	3.51253940023269	0.000443846190075962	0.0484049936489539
SNTG1	22.3400011998111	3.42547555888678	0.977595956954844	3.50397885191439	0.000458361756937987	0.0497658638232804
PARM1	1168.90545065059	1.76892244583466	0.505962346675218	3.49615432345631	0.000472015627515297	0.0510107404978691
FOXA2	6.13731998488239	4.50807437457849	1.28985186348442	3.49503264847818	0.000474003769823418	0.0510107404978691
RP11.281P23.2	15.7737914444585	3.48108778962407	0.996414473736716	3.49361423521823	0.000476529058875433	0.0510575806108243
CYP2W1	15.28736488606	2.70124796676849	0.774152858254984	3.48929534776551	0.000484295734131671	0.0514333509500522
UBR5	3688.53633578471	-0.584291729435956	0.167526026740154	-3.48776689094547	0.00048707253345068	0.0514333509500522
CTD.2033D15.2	45.4109789773136	-1.74585367046593	0.50062098576758	-3.48737611905959	0.000487784841501705	0.0514333509500522
GSTA2	5.08968649387196	4.27504378494037	1.22599218085783	3.48700738201209	0.00048845787467404	0.0514333509500522
IL1A	56.1598825945021	2.8031532324767	0.804152984107159	3.48584571328676	0.000490583863545046	0.0514355073070469
TIMD4	231.467414573762	2.66325448784714	0.765052841392886	3.48113796035096	0.000499288251234283	0.0521244132025739
SMCO3	6.83306145681844	-1.35564570531929	0.389846071598084	-3.47738711271895	0.000506326211455152	0.0526342256154805
RP11.815N9.2	10.5568761258501	1.78782661722789	0.51477027874175	3.47305718892292	0.000514565697951317	0.0532640908273421
RP1	4.80986292040806	-2.66785190900244	0.768567255272371	-3.47120162965697	0.000518134786792583	0.0534072350487595
ACKR1	631.667358503893	2.55409457287983	0.7361694227596	3.46943854759081	0.000521547364901703	0.0534890836921506
CDH23	1400.17963622986	1.94048918236014	0.559455282233841	3.46853313210662	0.000523307994695812	0.0534890836921506
CALB1	18.288185797368	-2.66757448740105	0.769888627377013	-3.46488361113918	0.000530460999288132	0.0538811398097887
IL22RA1	76.1050391127057	2.54980366448776	0.736227388525629	3.46333714858666	0.000533519438606075	0.0538811398097887
ARHGAP36	6.90939906726453	3.33146632166876	0.961957529662764	3.46321559834006	0.000533760523720531	0.0538811398097887
ELK3	5493.92686530471	-0.95901156138137	0.277122432604994	-3.46060603021745	0.000538960939279478	0.0541822089944788
BLK	28.1104800711965	2.53665426215217	0.733417947223679	3.45867492301567	0.000542839650873624	0.0543484829147203
SLC38A3	71.4300503121446	2.67780711167045	0.774582734283889	3.45709630895157	0.000546029666721943	0.0544447295034708
AC108938.5	39.4498346561953	-1.74258829856615	0.504888746485802	-3.45143026200359	0.000557623841691392	0.0553747675962562
ZFHX2	132.712527965854	1.4280483934877	0.413973299589365	3.44961473337588	0.000561387115795583	0.055522776727815
COL28A1	23.0615520500887	-1.80560682357905	0.52370865970572	-3.44773146312618	0.000565315790827538	0.055685884895669
LINC00452	35.4685646995738	-2.13050753501543	0.618151392669169	-3.44657888064593	0.000567732798313442	0.0556993756224863
RP11.111M22.2	87.1887029346866	-1.14016073263067	0.332282248077762	-3.43130197061819	0.000600691526441066	0.0586971731977152
SERPINB7	781.159708660438	-3.90077904488999	1.13746145884412	-3.42937249834727	0.000604978604330368	0.0587515465864322
RP11.155G14.6	17.3424722727247	-1.70246683222632	0.496506877018801	-3.4288887244594	0.000606057953243314	0.0587515465864322
PLA2G5	559.110672127608	2.47171753435476	0.721692103739787	3.42489203019736	0.000615043791694966	0.0593869754439381
NEXN	1662.75632974675	-1.50200268890438	0.438827572075947	-3.42276279906229	0.000619881445317109	0.0596184402663451
PCDH9	469.435865007039	-1.69811460572343	0.496395925319159	-3.4208874793475	0.00062417150658051	0.059662006961016
KLF12	1119.01084875015	-0.895725218013675	0.261904688326739	-3.42004270231396	0.000626113065027197	0.059662006961016
TRPC1	524.555526177663	-0.843889473057394	0.24695868433224	-3.41712815380118	0.000632854814574747	0.059662006961016
GRB14	34.4153956261961	2.41756809422633	0.707613306663302	3.41651022028711	0.000634292828593413	0.059662006961016
B3GNT3	25.2715291203178	2.39728877783872	0.701701572957746	3.41639362119981	0.000634564510933163	0.059662006961016
CHODL	14.3853550939038	2.06740338854218	0.605289879931922	3.41555915121975	0.000636512034091921	0.059662006961016
INMT	467.780317178354	-2.19357981004863	0.642305371391205	-3.415166535658	0.000637430259806999	0.059662006961016
LGALS17A	100.213378470531	3.27012103869806	0.958496114494887	3.41172070417976	0.000645542189309075	0.0600324089367487
POMC	95.834950375573	1.70251477317589	0.499101160748755	3.41116171844154	0.000646867129310607	0.0600324089367487
HCG4P5	603.912329643779	2.15323438201853	0.631400557676516	3.41025099810205	0.000649031189018099	0.0600324089367487
DGKZ	4435.03230503501	0.60757067648166	0.178208032479524	3.40933384442965	0.000651217338746507	0.0600324089367487
PGR	175.35455129584	2.96958728335422	0.871640226390982	3.40689563588611	0.000657062458488233	0.0603435293173272
TPRG1L	4188.60548348742	0.551636260670892	0.162171353581214	3.40156413872834	0.000670014041174973	0.0613025206436832
SLC37A2	2696.17474012028	1.97866761403301	0.582332230256061	3.39783290573313	0.000679218921104789	0.061912832177869
MTUS2	76.1039009361509	2.18224252619463	0.643549829558499	3.39094569831793	0.000696518999756326	0.0630463482695546
TMSB4XP4	104.774826182104	1.16433058510934	0.34337638741067	3.39082892067599	0.000696815834982183	0.0630463482695546
SAMD12	66.3897824036613	2.13066655710727	0.628576268203339	3.38967069691854	0.000699766277655512	0.0630533819109581
PLCB4	340.719924253894	-1.87034735383429	0.551924313948744	-3.38877506673494	0.00070205574848666	0.0630533819109581
SLC2A14	49.8247450615577	2.57625436708206	0.760811095031398	3.38619452832209	0.000708691276670856	0.0634161875377008
FBXO2	80.4732316248548	1.70886485475203	0.505200323350491	3.38254901227859	0.000718164616374808	0.0639910959522387
LLGL2	297.868276903742	1.33770783448358	0.395614192797171	3.38134439774614	0.000721320733219483	0.0639910959522387
SPATA12	21.4885443215702	1.71178533618312	0.506426571394151	3.38012543747598	0.000724527549199262	0.0639910959522387
FAM181B	9.48676097677967	2.67773935026867	0.792295927750281	3.37972120830166	0.000725593908009748	0.0639910959522387
DBX2	11.8526995806016	3.58133066552815	1.0619608569391	3.37237539606748	0.000745227983880675	0.0653490129467804
IGLV9.49	78.3020856974619	4.6072884880601	1.3663515329525	3.37196422512468	0.000746341422577745	0.0653490129467804
RP11.179A10.1	5.1331987518182	2.36690310451803	0.702565342023159	3.3689437308452	0.000754568314921835	0.0658333905900911
TRDC	174.569004839866	1.95278360038507	0.579967365576869	3.36705772822703	0.000759747825530243	0.0660493937006345
DUX4L26	10.0072842043269	2.26800519829102	0.674316961111225	3.36341116876774	0.000769856079444626	0.0666908303714637
BRSK2	29.8709261628044	2.10256723789218	0.625543193266484	3.36118634256561	0.000776084472678677	0.0669928183147258
CELF4	37.1767833679524	2.30554068947408	0.686178571927691	3.35997185542692	0.000779504130515121	0.0670510788885701
MCTS2P	49.8081539151482	-1.52704369184668	0.455003420941031	-3.35611474895832	0.000790457642890412	0.0674792884852704
MAGEL2	82.4523262395939	4.0586470424746	1.20961122403053	3.3553318304627	0.00079269836483135	0.0674792884852704
COL6A6	496.431399410959	2.94909242068326	0.87915262587669	3.35447149207162	0.000795167461037187	0.0674792884852704
SIGLEC16	130.936239468476	1.71624367422535	0.511647943103547	3.35434491110231	0.000795531339136185	0.0674792884852704
BAIAP3	71.1747955807375	1.27955008910055	0.38172451371618	3.35202493715644	0.000802227923576066	0.0678118544811063
FAT2	76.2268552625332	1.90612948195205	0.568935033727671	3.35034647007596	0.000807105376988622	0.0679888870843278
DNMBP.AS1	8.4812509016361	1.75536836954499	0.524792687601535	3.34487962773942	0.000823182884622922	0.0691049302008706
FAM133B	393.231408748364	-0.799579456112578	0.239285655228635	-3.34152690995449	0.000833189395216069	0.0694344580633273
LINC00954	22.8757501473589	1.87388815974505	0.560908620318943	3.34080827404565	0.000835348866187647	0.0694344580633273
IGKV4.1	1808.35693594108	3.50479064228194	1.04911451446048	3.34071313853124	0.000835635133268583	0.0694344580633273
NPHS1	16.4717685454461	3.51369325687149	1.0526897093291	3.33782426647908	0.000844371338006719	0.0699225336141225
TAF1A	233.792082373642	-0.694954568002553	0.208483334037615	-3.33338188018984	0.000857970932914962	0.070742654537402
SIGLEC12	111.621916304484	2.35192314673469	0.705710369767311	3.33270311375781	0.000860066658381775	0.070742654537402
IGLL5	798.488442454661	3.31695422408577	0.996522836580467	3.32852806009723	0.00087306209639644	0.0715705837344585
CCL23	74.0154298670285	2.18831078457354	0.657984710758464	3.32577755803939	0.000881722641405191	0.0718703726418907
LDLRAP1	2570.66527570186	0.67645995676716	0.203453174059235	3.32489261912528	0.000884525951424897	0.0718703726418907
HPGD	192.178825659371	1.91391669718136	0.575688229193351	3.32457153043258	0.000885545137550006	0.0718703726418907
VTCN1	21.9192083575295	2.51757223557365	0.757560921850553	3.32326043088889	0.0008897180826866	0.0719699438475197
ASPG	7.44053669067244	3.50765831812829	1.05613587643754	3.32121879048367	0.000896252487453945	0.0721476929380992
RP11.281O15.8	2.96775798738985	3.15252753342495	0.94948390842899	3.32025377727686	0.000899356532423866	NA
HPSE2	14.2083476596917	2.37611990182178	0.715851188194444	3.31929308913344	0.000902456560141252	0.0721476929380992
CEP290	923.24714161534	-0.688992364909783	0.207579891862143	-3.31916718295312	0.000902863577817014	0.0721476929380992
ARFGAP2	4557.26152300071	0.519551532680356	0.156543307780045	3.31889967094833	0.000903728930331096	0.0721476929380992
NBPF8P	306.183532154612	-0.910129815802536	0.274404489866083	-3.31674535007319	0.000910725838006399	0.0722305250626843
NFE2	115.098130986849	2.23089699498631	0.672789461791196	3.3158917041401	0.0009135122121872	0.0722305250626843
RP11.677I18.3	5.15131989752476	-1.92777239706539	0.581380430617729	-3.31585360555925	0.000913636753218283	0.0722305250626843
DCSTAMP	238.522765669799	3.53766341244394	1.0674838999791	3.31402039179534	0.000919648000456724	0.0724712290424429
GRIN2C	80.3916465958775	1.61390288468021	0.487451881934866	3.31089681770038	0.00092997492859214	0.0730493811272585
HMGXB4	1567.45160648372	-0.757378891967482	0.22922572755773	-3.30407454711529	0.000952904898374109	0.0744105121840999
ISG15	7228.84202188728	1.5077761596611	0.456462411778927	3.30317704317644	0.000955960128116738	0.0744105121840999
PCDHGB2	170.665777627094	-1.76747305351755	0.535105600979985	-3.30303598071227	0.000956441148872543	0.0744105121840999
NARS2	757.043896902236	-0.788588250842134	0.23920987518894	-3.29663752476468	0.00097849696199684	0.0757447189828496
MTND4P24	4.16959368731807	2.73062881580408	0.828403189215709	3.29625579832605	0.000979827565543625	0.0757447189828496
LGI4	288.353720444258	1.74999023331507	0.531043788776967	3.29537840437871	0.000982892296760544	0.0757447189828496
AC093495.4	59.2051361516372	-0.795575015317868	0.241552589401108	-3.2935892647244	0.000989169272138659	0.0758724393189092
USF1	3800.13864942394	0.575308067232012	0.174721912089757	3.29270702427105	0.000992278148174241	0.0758724393189092
RP11.1152H15.1	30.0213094777605	2.47876242935106	0.753009109332005	3.29180935347512	0.000995450681390902	0.0758724393189092
MYPN	69.5009937508227	-2.56183926350342	0.778382667396935	-3.29123369623674	0.000997490098875198	0.0758724393189092
RP11.318C24.1	5.0956518267673	1.07482017002646	0.326642966552036	3.29050455722956	0.00100007881864541	0.0758724393189092
TBC1D10B	4726.00757136716	0.524497788034894	0.159475286559132	3.28889697803061	0.00100580832203233	0.0759224762931424
CTB.32O4.2	11.4460832574655	1.51991838684106	0.462181245766929	3.28857650707777	0.00100695412497352	0.0759224762931424
RUNDC3B	46.7844802850976	1.29001817146733	0.392425436969728	3.28729498635138	0.00101154812587563	0.0760341820523565
FAM78B	341.564359887936	1.53706932857319	0.468357373049921	3.2818301088416	0.00103135724215481	0.0771777446958919
PNOC	24.1023130499726	2.57607812371611	0.785064320813289	3.28135931721801	0.0010330804582896	0.0771777446958919
TRPC2	48.9264024156427	1.69432093809552	0.516592875192582	3.27979927610091	0.00103880966360943	0.0773691502204721
CCR3	13.5077552146144	2.44631686560915	0.746493806596389	3.27707590336623	0.00104888168592246	0.0778818562474155
KCNN1	19.9257926989746	1.32764653942481	0.405689361592118	3.27256927372829	0.00106574752513326	0.0786141973784004
SLC4A1	16.5867185902165	2.84130372448202	0.868406543516558	3.27185895326898	0.00106842863937105	0.0786141973784004
ICA1	253.056981438124	0.933978553781872	0.285501965169941	3.27135595450608	0.00107033098714553	0.0786141973784004
DLX5	390.949141116353	2.5223347087275	0.771116489759181	3.27101643166161	0.00107161683765227	0.0786141973784004
ZNF107	372.766063062622	-0.760686201858179	0.232631631112486	-3.26991732904267	0.00107578919694116	0.0786839948864541
KCNQ5	63.707161652455	-2.38377748598697	0.729995990387186	-3.26546654690888	0.0010928391330204	0.0796924393449416
BCAS1	270.634715357727	2.2248150816784	0.682345292351517	3.26054141006994	0.00111199728380997	0.080437816417551
ABL2	3485.55332185549	-0.778095869129838	0.238698245836251	-3.25974690934101	0.00111511672173396	0.080437816417551
UFC1	4737.83124946022	0.448503735323914	0.137604196970258	3.25937540568515	0.00111657812620211	0.080437816417551
P2RX6	359.459191319776	-2.01666796087823	0.618849932001022	-3.25873504479096	0.00111910130679512	0.080437816417551
RP11.114H24.6	16.6251489064885	1.12110595048063	0.344279348700908	3.25638454560512	0.00112840811273896	0.080437816417551
NDP	225.237346372935	2.6370798424763	0.809984689596631	3.25571566518072	0.00113106959441361	0.080437816417551
TNXA	24.5931522473123	2.1676508489053	0.665838188295684	3.25552196766265	0.00113184140159942	0.080437816417551
FAM90A1	55.2411350195986	1.31686945182874	0.404503778643206	3.25551829514623	0.00113185603981132	0.080437816417551
ZNF621	1018.29989990111	-0.577203665124444	0.17731154481638	-3.25530785782834	0.001132695110223	0.080437816417551
TNFRSF11A	688.157387475843	1.77788845541346	0.54689777306893	3.25086065982094	0.00115056232509487	0.0813802806924388
NELL1	5.37660140767667	3.31573764976001	1.02011700009889	3.25035035141909	0.00115262913420868	0.0813802806924388
BCO1	4.75193167170951	3.40193923779271	1.04875448734006	3.2437899230553	0.00117950704267663	0.0828054930814781
AC005062.2	17.6590798022901	2.44965702508508	0.755192019069114	3.2437538576012	0.00117965638951059	0.0828054930814781
PSTPIP1	1351.16982163146	1.82878664853209	0.56423708322031	3.24116706065211	0.00119041398514285	0.0828054930814781
LINC01033	14.4484777841082	2.5109611019491	0.774786319238226	3.2408433649395	0.00119176648578979	0.0828054930814781
NFKBIA	7274.16273553691	0.836272295560299	0.258090027470822	3.2402348271858	0.00119431298850038	0.0828054930814781
ACER1	3.83629974952878	1.76818313888906	0.545730310817848	3.24003102601944	0.00119516694315575	0.0828054930814781
KCNK3	48.8120043918403	2.43020543481239	0.750132167567156	3.23970300153116	0.00119654259518448	0.0828054930814781
SCNN1A	69.3314419854184	1.52299071337717	0.470586790628445	3.23636520129112	0.00121062389816308	0.0833512959911871
IGLL3P	4.33118506434143	2.30891792894156	0.71346206370181	3.23621681713768	0.00121125343144916	0.0833512959911871
CLEC4GP1	81.9347959589138	2.31014522136398	0.714379127670756	3.23378040018645	0.00122163349256821	0.0838294510953617
RP11.65M17.3	2.91886311169358	3.15568415507768	0.976047540192704	3.23312546277678	0.00122443775220379	NA
FCGR2C	208.921772172969	-1.20230159237136	0.372064367173696	-3.23143439266806	0.00123170596054348	0.0841722588787202
RP11.76E17.3	14.2752739639075	-1.73862654550969	0.538109734115283	-3.23098883979157	0.00123362756482628	0.0841722588787202
PEBP4	25.4617362781615	1.48251599418832	0.45895254444633	3.23021630913234	0.00123696593955792	0.0841722588787202
RP11.832N8.1	16.976685125689	1.1449953635175	0.35472358378334	3.22785237819667	0.00124723320384143	0.0846351664906731
RP11.662G23.1	21.3590791484939	2.54755837348889	0.789911229197946	3.2251198353967	0.00125919948940871	0.0849213084539241
ERAS	3.41546613336696	1.80284410480622	0.559056096284762	3.22480000985075	0.00126060696975082	0.0849213084539241
NIPAL4	62.5737931843729	2.1408804535871	0.663939507729879	3.22451131264524	0.00126187870845202	0.0849213084539241
ITIH2	17.7842818802298	-1.90734864170316	0.592442114403352	-3.21946835873417	0.00128428533224623	0.0861917757731958
LINC01529	8.41459925752777	2.35699200245197	0.73255250871997	3.21750587759296	0.00129310377525048	0.0865458414399838
SLC9B2	2179.42815154265	1.94503052358854	0.604768817424052	3.21615544246012	0.00129920440345454	0.0865961793142046
KCNQ2	7.0455875189531	2.96770886616362	0.923064180210964	3.21506232154449	0.0013041620492038	0.0865961793142046
TOLLIP	3013.07445902844	0.521755298449727	0.162292430316992	3.2149084059597	0.00130486150513549	0.0865961793142046
LHX9	224.425310355134	-2.21061941241397	0.687764247539296	-3.21421100373157	0.00130803512902458	0.0865961793142046
RP5.1126H10.2	33.6119908396869	0.752167329233621	0.23410712741598	3.21291939094665	0.00131393160921069	0.0867514467065082
XXyac.YX65C7_A.3	17.3144715467991	2.1856717211297	0.680846732853946	3.21022576104301	0.00132630758586979	0.0873116484810958
RP3.413H6.2	4.32430052138874	2.95900726979775	0.921946769561094	3.20952073101403	0.00132956458450889	0.0873116484810958
ATP5EP2	26.3338014434894	1.22105701068223	0.380575193641976	3.20845139431483	0.00133451864302603	0.0874020266232787
MGMT	1253.00133746673	1.08056024167722	0.336946942916075	3.20691510754071	0.00134166581849893	0.0874732767308242
C17orf59	840.704878577393	0.846072791440476	0.263850007011212	3.20664305081684	0.0013429351663086	0.0874732767308242
SLC35D3	4.44944996916556	2.89146372123936	0.901915950342934	3.20591261318745	0.0013463486860203	0.0874732767308242
ASAP1	4342.25271604914	-0.762308251399392	0.237924380969896	-3.2039938416225	0.00135535375757838	0.0875063032616408
KCNH2	486.106078896753	2.78422236782168	0.869232512235721	3.20308125689004	0.00135965611664608	0.0875063032616408
TMEM229B	516.02160504109	1.40251559170268	0.437896221534109	3.20284926594974	0.00136075183891889	0.0875063032616408
LY86.AS1	5.19313104028316	1.97751781970756	0.617653342887001	3.20166294326905	0.00136636773255784	0.0875063032616408
DDX17	16380.9551048282	-0.384622238805983	0.120140958966366	-3.2014247440264	0.00136749791000725	0.0875063032616408
CST3	58297.3654763513	1.49851447342916	0.468103593089841	3.20124539856193	0.00136834941446424	0.0875063032616408
HSPA8P1	18.2302862876556	1.51789985540259	0.474342071734504	3.20001101705391	0.00137422334550116	0.0876524859197074
CTD.2350C19.2	7.95870099517608	1.39481834648918	0.436223461789487	3.1974858499525	0.00138631212669013	0.0881932784971694
CLU	33674.622833238	1.80976282896314	0.5666626373971	3.19372181881636	0.00140451387999714	0.0891191417518184
DCST2	61.790202208523	1.34238191876752	0.420675088547889	3.19101833056298	0.00141772285157039	0.0893836767932867
COL4A3	32.9812035195135	1.87358437926104	0.587206702010192	3.19067267598816	0.00141941991797808	0.0893836767932867
RNF182	161.890419750099	-2.06343127473396	0.646785194320588	-3.19028835671088	0.00142130901585177	0.0893836767932867
AC141586.5	69.8921904169986	-0.796909100776744	0.249824159727418	-3.18988004061036	0.00142331860790816	0.0893836767932867
NDUFB11	7438.12651885099	0.788648501780723	0.247334782501772	3.18858711986888	0.00142969921309808	0.0895541591712126
FZD10	48.3490782972466	1.62259625919809	0.509248763446336	3.1862546866431	0.00144127657951268	0.0898627997492551
TEKT3	56.5251485492012	1.85861318522147	0.583348204683233	3.1861128058682	0.0014419836056207	0.0898627997492551
HAP1	15.21075507701	1.92465137263355	0.604958806431152	3.18145855911692	0.00146535485526786	0.0910464634996847
SPTBN4	189.887366478691	1.89453295664567	0.595679077417103	3.18045912382967	0.0014704188206969	0.0910464634996847
C14orf180	6.33244607273679	3.39115170755528	1.06647684442181	3.17977059257559	0.00147391686584476	0.0910464634996847
KCNIP3	1138.2289571372	1.6401155035326	0.51585954885985	3.17938382095975	0.0014758851997984	0.0910464634996847
ARMC5	1293.60451033877	0.789963652728223	0.248642807324784	3.17710237117919	0.00148754517927619	0.0915346125555112
RP11.192M23.1	3.94369400546553	-1.97893320551318	0.623445244958123	-3.17418926764948	0.00150255677530987	0.092094762371704
SCHIP1	43.0283272486893	-1.16353992499385	0.366631102587647	-3.17359852118846	0.00150561793699067	0.092094762371704
LDOC1L	2429.56299301005	-0.728447007782159	0.229566058571004	-3.17314768706043	0.00150795795770116	0.092094762371704
ITFG3	4000.260075906	0.742451087303674	0.234108277501249	3.17140041022135	0.00151705875698842	0.0924195221308481
HPCAL4	66.6028322371141	2.61601008899191	0.827007447242453	3.16322434303905	0.00156032040380906	0.0945164478107776
GRM1	32.2722453425851	2.04861912242086	0.647768161106671	3.16258075870991	0.00156377354945013	0.0945164478107776
SLC2A8	1403.05630923448	0.705652217998166	0.223205105484368	3.16145195902602	0.00156984711306157	0.0945164478107776
IFITM4P	22.6743437368856	1.77334190239406	0.560983170451383	3.16113209058871	0.00157157212648216	0.0945164478107776
ETFB	3413.49317611544	1.05359705085421	0.333319921628433	3.16091833247428	0.00157272587190523	0.0945164478107776
RASSF7	424.25666527549	1.29945558242838	0.411166354885976	3.16041321714843	0.00157545529821485	0.0945164478107776
CXorf38	1517.48697489067	0.435019212288505	0.137671317006624	3.15983911352845	0.00157856280268522	0.0945164478107776
SDF4	12530.3339133309	0.498043493887202	0.157734471282716	3.15748035186634	0.00159138960760757	0.0948543294779563
TRMT13	486.822208783965	-0.515804839591647	0.163365151747483	-3.15737373652942	0.00159197163559548	0.0948543294779563
ZNF295.AS1	6.26348527628046	1.33240056947589	0.422222341163473	3.15568467031928	0.00160121866656465	0.0951731649769048
TDRD12	48.0153919995616	2.14096443460411	0.678705994910113	3.15447992305955	0.00160784440694006	0.0953350267406277
ISG20	1034.68406232033	1.34013926895473	0.42514377989529	3.15220246027073	0.00162043874729777	0.0956694749049243
VSIG10L	234.946127420332	1.00858765421119	0.320102585626026	3.15082632724973	0.00162809268732251	0.0956694749049243
PTPN18	3809.37868431564	0.66315940707809	0.210473654684771	3.15079532434267	0.001628265505574	0.0956694749049243
SLC25A39	7368.03200398949	0.479533910618884	0.15220466382047	3.15058618167252	0.00162943176225809	0.0956694749049243
PPP1R14C	229.927777081868	2.14053177290675	0.67954784733237	3.14993533024879	0.00163306607046352	0.0956694749049243
SOX2	62.4625234368138	3.05686039466294	0.970788546384558	3.14884266614743	0.00163918420773587	0.0956721201618326
RLN2	3.25008118997103	2.12484470900528	0.674944249953831	3.14817810382209	0.00164291558966633	0.0956721201618326
RP11.66N24.7	3.32820393340638	1.42453523936931	0.452559583238263	3.14772969600187	0.00164543772267456	0.0956721201618326
PPFIBP2	888.881183806344	1.26614233405225	0.402426249039637	3.14627173817268	0.00165366285732729	0.0956721201618326
RP11.384P7.7	13.2429834018041	3.13453164685812	0.996306133902713	3.14615311518719	0.00165433373572112	0.0956721201618326
RSPO4	14.8950081329359	1.89388023165611	0.602043891170227	3.14575109793884	0.00165660922790352	0.0956721201618326
IL24	158.607536088787	1.95343695305017	0.621354544322945	3.14383627012613	0.0016674870857229	0.0960732123045393
SMAD5.AS1	10.4554156464283	1.22825387170769	0.390988250377594	3.14140864980345	0.00168137250934225	0.0966452918369926
C9orf92	34.6827354068205	2.3786646375918	0.757578790746406	3.13982475043713	0.00169048930131028	0.0967967918263595
THBS1	20025.3753834691	-1.40511511875263	0.447549515812493	-3.13957465958096	0.00169193295304169	0.0967967918263595
MATN3	241.038899889438	-1.88950191519429	0.602371224441265	-3.13677320318034	0.00170818206783387	0.0974980834932562
FO538757.3	34.1764232805901	2.7147689502779	0.866292711462837	3.13377789557261	0.00172571424302824	0.0980929354618334
AP4S1	428.739654833141	0.724367227507888	0.231159778756954	3.13362139124342	0.00172663482944813	0.0980929354618334
CFP	355.237927941564	1.76673174026602	0.564034363952862	3.13231223694319	0.00173435321628435	0.0983028183772861
MT.TC	9.47205452739171	1.74338142681772	0.556853518990146	3.13077203854138	0.00174347438511416	0.098591054986004
ZNHIT6	1416.9508094594	-0.497402218775559	0.158958768662709	-3.12912727596039	0.00175326347545991	0.0988342986548548
GREM2	166.808678245254	2.78220543906564	0.889314410474946	3.12848347704135	0.00175710889879466	0.0988342986548548
RANBP3L	163.591277454558	-1.87678622627637	0.600214969156836	-3.12685674752967	0.00176685996168749	0.0988342986548548
DCLK3	102.094841834821	1.70815248725693	0.546338318344956	3.12654710442333	0.00176872167384643	0.0988342986548548
NMU	194.101400048077	2.44733191091943	0.782820720639627	3.12629935104396	0.00177021257596237	0.0988342986548548
MYBL1	726.823251475795	-1.18406876229851	0.378809504377488	-3.1257630777885	0.00177344365778848	0.0988342986548548
CXCL5	122.456550280272	2.15011990125618	0.688076291829214	3.12482776515988	0.00177909195469223	0.0988342986548548
RP11.685N10.1	5.63898930174188	-1.6223252937116	0.519201551706144	-3.12465417019747	0.00178014210193361	0.0988342986548548
RP11.319G9.3	11.2316368221682	1.76616388034755	0.565793296133291	3.12157088537061	0.00179888935041745	0.0995659760065807
CTD.2091N23.1	2.2052104773341	-2.16007471877525	0.692033555342461	-3.121343903196	0.00180027661242023	NA
MTBP	361.059896258963	-0.844838889363483	0.270741991011943	-3.12045754781427	0.00180570323117263	0.0995659760065807
LRRN2	202.62928755431	2.33334233271417	0.747860902907409	3.12002181641397	0.00180837645956763	0.0995659760065807
LRRC4B	105.705543127195	2.06557018662668	0.662080189148713	3.11981874776006	0.001809623535426	0.0995659760065807
RBAKDN	8.5591278688998	2.7451862238501	0.880612605889928	3.11735967153897	0.00182478796544454	0.100174708332235
SLC28A1	28.5280695909814	1.87388445885948	0.601480569669249	3.11545302268022	0.00183662600647982	0.100524202047834
PRAME	83.1950491897762	2.98075406194218	0.956900426052082	3.1150096507324	0.00183938891685289	0.100524202047834
SYN2	70.3028478109715	1.82293091584957	0.585332483387854	3.11435118942759	0.00184349922294934	0.100524202047834
RP5.1086K13.1	25.9276640801729	1.16707662827947	0.375112338059493	3.11127230396345	0.00186283073556866	0.100875137946688
WWC2	939.02668502957	-0.84276073837594	0.270958128183235	-3.11029879054237	0.00186898181288974	0.100875137946688
CLDN18	19.8012288220144	-1.07257601466746	0.344880194125213	-3.1099959723348	0.00187089894995962	0.100875137946688
SLITRK3	30.5644250487352	3.38004678257988	1.08685173917279	3.10994283834192	0.00187123552662902	0.100875137946688
MYLPF	71.042927967485	-2.14355963403606	0.689361055423806	-3.10948757138339	0.00187412169085621	0.100875137946688
FAM109A	2831.70584684314	1.32894476457733	0.427396612369281	3.10939470767048	0.0018747109021162	0.100875137946688
LINC01160	27.8367097583193	-1.44076293820605	0.463895072081428	-3.10579487671976	0.00189768305620678	0.101886811824341
ATG13	5529.95727585009	0.580613285821285	0.187489570631457	3.09677644396861	0.00195637352392076	0.10445747579708
HR	435.328948837163	2.26415919290702	0.731163504345164	3.09665236223027	0.00195719252419056	0.10445747579708
LINC00202.1	11.1542076472757	1.76034503128468	0.56850042131982	3.09647093523325	0.00195839059785757	0.10445747579708
CATSPERB	8.21503716901286	2.22511629286138	0.7191988974266	3.09388167977339	0.00197556256956944	0.105143830091529
SULT1B1	29.3664972621004	-1.36017508261618	0.440149478528093	-3.09025717164258	0.00199983255784651	0.10583097944915
CLDN11	4287.98834627113	-2.4521785954227	0.793554529372835	-3.09011984010817	0.0020007574983305	0.10583097944915
NUDCD1	1032.93955298664	-0.608839779785781	0.197034629688617	-3.09001407898682	0.0020014700767738	0.10583097944915
HHLA3	563.624694643523	0.977548964434136	0.316702634217906	3.08664614314997	0.00202428412666368	0.106734674625382
TMEM53	564.200022470774	0.595544364966679	0.192993096265443	3.08583248049229	0.0020298314647702	0.106734674625382
PCLO	119.470466892651	-2.32671241600172	0.754064015536214	-3.08556351723958	0.00203166825088226	0.106734674625382
LINC00494	5.14313372069452	2.3609971159668	0.765581255295416	3.0839275382412	0.00204287346024064	0.107093038112057
RP4.610C12.3	18.0188381488892	1.87875667973522	0.609390237726649	3.08301079246689	0.00204917723168315	0.107193470220102
KRTAP5.AS1	12.2631386026857	2.15729007196881	0.700121833158541	3.08130666663598	0.00206094266682766	0.107460581511988
AE000661.37	43.6774594572563	1.89472212056047	0.615200358613529	3.07984560482148	0.00207107927516856	0.107460581511988
ALG12	663.575517135718	-0.826456504789649	0.268445995371705	-3.07866952399603	0.00207927193341496	0.107460581511988
RP1.244F24.1	51.3226390458299	-1.223518598663	0.397426235702512	-3.07860550902042	0.00207971871797	0.107460581511988
HHATL	19.5641776079739	2.5742145423312	0.836323970525922	3.07801119309351	0.00208387087788984	0.107460581511988
LAMTOR2	3032.46539567221	0.750010098904479	0.243690980674122	3.07770971592682	0.00208598003938248	0.107460581511988
SMIM1	25.0618637266336	1.66751785532773	0.541853554988043	3.07743271217354	0.00208791970857944	0.107460581511988
SPINK13	14.831838251353	3.2297487152647	1.04960295436205	3.07711473356871	0.00209014833624719	0.107460581511988
KREMEN2	46.0577061159451	0.892972852227446	0.290248170060221	3.07658391796982	0.00209387354372698	0.107460581511988
ARL4D	1107.90141509148	1.22520679600433	0.398384905618547	3.07543478360966	0.00210195891616665	0.107649380216007
ACAA2	3551.16867933352	0.636440719333303	0.207081391273726	3.07338440899326	0.00211645662666223	0.10809454211869
SCIN	396.772532418164	-1.39566341690798	0.454176251917548	-3.07295551234887	0.00211950082585667	0.10809454211869
PTH1R	475.879474434932	1.97814934353147	0.643962070060458	3.07184139486003	0.00212742731998594	0.108272754166534
CH17.385C13.2	5.01495081869245	2.05543295006882	0.66949240929432	3.07013630256892	0.00213961100706289	0.108335182497093
FBXL15	895.513018386593	0.810366660646679	0.263966551394486	3.06995964589325	0.00214087695289955	0.108335182497093
NPFFR1	11.1174466593516	2.03500174013618	0.662908289366677	3.06980886010697	0.00214195804765221	0.108335182497093
CTC.786C10.1	38.3971422746845	-1.43584757155585	0.467910125228415	-3.06863966847249	0.0021503578503146	0.108535313895321
CXorf58	5.33308767686323	1.45133371553289	0.473066322565847	3.06792863136198	0.00215548089862772	0.108569572933148
KCNJ10	135.66391265942	2.50056394599795	0.815336162366604	3.06691161439446	0.00216282799353546	0.108715483650366
CDK16	9998.48607812389	0.512526848023737	0.167183109782999	3.06566164900861	0.00217188939213596	0.108946788419896
ITIH4	24.8007210860728	1.23728214866249	0.403720963970351	3.06469631027969	0.00217891124370042	0.109075046664667
GABRB3	33.028799387733	2.26183509397263	0.738721218424222	3.06182499914838	0.00219992028015456	0.109901538903672
ADORA2A.AS1	11.5132561091095	-1.08653268322992	0.355291544917903	-3.05814393495061	0.00222712575063177	0.110755989782668
ACTC1	141.69663233988	-2.47620037438858	0.809758704649254	-3.05794844831108	0.00222857910965148	0.110755989782668
PRADC1	1276.45703145047	0.707409530380915	0.231463504609084	3.05624651962153	0.00224126898617683	0.110755989782668
DLGAP3	90.5066775195455	1.10847018918913	0.362696455692657	3.05619250420366	0.00224167281641892	0.110755989782668
IGHV1.46	354.824015743523	3.50217194084405	1.1461628344292	3.0555622950278	0.00224638931752704	0.110755989782668
SLC22A18	658.260368522166	0.936043209705381	0.306343787352782	3.05553188394659	0.00224661714461933	0.110755989782668
SPINT1	508.739331015504	1.6310325912174	0.534000317622011	3.05436633161689	0.00225536494645344	0.110755989782668
CYP2C18	15.5998956201607	3.2569639792477	1.06638755151207	3.05420292522125	0.00225659384918566	0.110755989782668
MAS1	17.523876354196	2.55048712365197	0.835239479506067	3.05359981925213	0.00226113483848511	0.110755989782668
LINC00460	93.4194546864394	-2.83004258578439	0.926838362755068	-3.05343703876473	0.00226236190190149	0.110755989782668
TMSB4XP1	23.3673835977987	1.39529494058954	0.457449487671982	3.05016177346787	0.00228718132924509	0.111233289441091
RP11.36I17.2	8.43861015250607	-1.45916632450951	0.478519455541157	-3.04933541909877	0.00229348258747865	0.111233289441091
LRRC10B	115.343350407572	1.64563290848033	0.539673772311338	3.04931051481777	0.00229367273845422	0.111233289441091
SLITRK2	47.9388677325997	1.92434024341414	0.631132979210958	3.0490250181823	0.00229585361500982	0.111233289441091
FLJ37505	10.5333318955787	2.75879131678027	0.905049506694188	3.04822144686551	0.00230200220633326	0.111233289441091
HMGCS1	2226.59636588423	-1.00748139939752	0.33059017840538	-3.04752368705315	0.00230735340271404	0.111233289441091
KERA	78.4789450245855	2.54520663539957	0.835306721704601	3.04703238854058	0.00231112805746756	0.111233289441091
CLTB	4369.61501330989	0.797212409611287	0.261679334131185	3.04652414474438	0.00231503885403801	0.111233289441091
CRY2	2000.54838683368	0.734180220000478	0.241000004281401	3.04639090023925	0.00231606513624063	0.111233289441091
PKP1	449.557307730712	2.41587063461788	0.793080494842091	3.04618591723013	0.00231764477979103	0.111233289441091
CRK	4421.7770850048	-0.470668840687754	0.154562943825254	-3.0451596549551	0.00232556822626735	0.11125605135768
DBP	1003.01682578376	0.942552020254871	0.309547126629047	3.04493868355108	0.00232727751910915	0.11125605135768
BICC1	1860.59307263383	-0.804495777740855	0.264258020035226	-3.04435709324399	0.0023317818287745	0.11125605135768
ART5	33.2121291562209	2.66203522559574	0.87463465224383	3.04359679640684	0.00233768222767186	0.111320154268608
HAMP	113.105842258957	-2.01081714552581	0.661508594503617	-3.039744550915	0.00236778884547037	0.112534462463027
AC034243.1	8.18781559359688	2.21137065065196	0.728032166194923	3.0374628393272	0.00238578819035697	0.113064534628728
TGS1	1038.98109451485	-0.635317811769805	0.209181645399801	-3.03715849713079	0.00238819844727265	0.113064534628728
CTD.2292P10.4	24.2069365233141	-1.18355654971043	0.39024363380967	-3.03286574634468	0.00242243345293339	0.114107553313894
AHCTF1	1639.47103766713	-0.554098133885578	0.182710269219363	-3.03266004835407	0.00242408513184722	0.114107553313894
ILVBL	4179.28987336425	0.520449660572412	0.171617571835642	3.0326128904262	0.0024244639378037	0.114107553313894
IGHV1.24	363.759506618525	3.45945176903378	1.14095775785595	3.03205946514152	0.00242891349311167	0.114107553313894
C11orf30	905.015239268045	-0.690332722223164	0.227796755666116	-3.03047653248842	0.00244168160976546	0.114487216976891
NRXN1	16.9643637507431	2.39022841328804	0.789173803413066	3.02877313330807	0.00245549001350718	0.114720428152183
MIEF1	2388.64673448905	-0.596763072219645	0.197035749990115	-3.02870454853794	0.00245604748141929	0.114720428152183
TMEM104	2035.03683699283	0.589691904803156	0.194913967067551	3.02539583835358	0.00248307916527392	0.115761719329154
STK31	11.9323821813118	1.74107178769604	0.575665240179524	3.0244518275119	0.00249084135521567	0.115902406602978
KCNJ15	649.410496842999	1.53194375916337	0.506634387654196	3.02376584869522	0.0024964957802044	0.115944668088618
WNT4	124.777622134386	-2.29756308718366	0.760445391371186	-3.02133869605133	0.00251659686176459	0.116656441624378
OPRD1	7.92958729557428	1.21509345948373	0.402373774736631	3.0198127606081	0.00252930996835923	0.116957711110035
LINC00222	4.7018523733741	-1.4606026255739	0.483737683594306	-3.0194104679239	0.00253267138144044	0.116957711110035
DIRAS3	548.335874250553	2.09452582714485	0.694129452654858	3.0174858870112	0.00254880909055616	0.117321851625895
DGKK	2.11615984326894	2.70376701198854	0.896243386271695	3.01677764478241	0.00255477137042678	NA
RAD21	9805.36671335052	-0.606012250977297	0.200899852511487	-3.01648927762477	0.00255720261787045	0.117321851625895
SLPI	330.878725139188	2.09039403020341	0.692991668132821	3.01647786882592	0.00255729884989893	0.117321851625895
PON1	10.7491830194975	2.69554079615726	0.893692012177433	3.01618539656601	0.00255976695389094	0.117321851625895
AC008440.10	9.1376726849521	1.96440519211147	0.651597832190554	3.01475096304034	0.00257190336921711	0.117657354694017
PDE6G	98.7208509299817	1.48593812133853	0.493020130801965	3.0139501989938	0.00257870131503429	0.117719990034057
GRN	40435.9972007873	0.776803290640625	0.257778262593458	3.01345537372064	0.00258291025659071	0.117719990034057
ALG1L5P	3.50853820118911	2.73521917029503	0.908046239685537	3.01220251872003	0.00259359503630751	0.117986840115374
RGPD1	5.12114283562645	-2.12429788271208	0.706042452169712	-3.00873959658371	0.00262333859938037	0.119118101569262
EBP	3307.41433485135	0.861014341576928	0.286234607723276	3.0080721140797	0.00262910742818813	0.119158562825988
IGFLR1	235.41880290058	1.37588684780495	0.457631269086864	3.00654028853913	0.00264239035625215	0.119538803727562
CLEC4A	488.952951964409	1.44603984910544	0.481149996053671	3.00538264775156	0.00265246927844257	0.119719923132012
CDKN1C	1040.65007092835	1.36081335474387	0.45285637995854	3.00495568786831	0.00265619543728971	0.119719923132012
HLA.V	47.6783323708314	2.0000117159591	0.666339403823426	3.00149098865101	0.00268660990937455	0.120867759624514
RP11.88H9.2	7.31875963630911	2.76686196489963	0.922127120959031	3.00052118846915	0.00269518001657648	0.120992128004439
SNX16	519.482273649871	-0.642393008282677	0.214126846310372	-3.00005823348064	0.00269927994442749	0.120992128004439
RP4.800G7.1	12.2552650969566	1.23172567347253	0.410708921015181	2.99902342132716	0.00270846485159415	0.121181479596325
PAPPA	489.409024520559	-1.62413097015958	0.541719804558532	-2.99810152128949	0.00271667160401886	0.121326454505625
ATP6AP1	12860.9805081542	0.763537082269023	0.254722720640207	2.99752248386005	0.00272183780437746	0.121335357159009
C1orf61	16.7018290566383	1.56012600492306	0.520854072875207	2.99532265594256	0.00274154670938343	0.121907882801852
SLC48A1	1496.33754794396	1.17155043888043	0.391171853746931	2.99497631963665	0.00274466149007403	0.121907882801852
C9orf171	2.10583412333901	-1.52196012187557	0.508279934958388	-2.99433445469408	0.0027504426610429	NA
ANKRD50	1454.44245455319	-0.886866093933717	0.296292683385731	-2.9932095649461	0.00276060119312722	0.122378064728742
HAX1	3873.1406362519	0.4460370044423	0.149041956304102	2.99269424196376	0.00276526635270644	0.122378064728742
SLC22A1	35.2714848592192	1.38123462337943	0.461728619055274	2.99144251921295	0.00277662805954136	0.122658674261367
HERC4	1654.70068073581	-0.521745843202905	0.174658382044711	-2.98723620987936	0.00281512121630466	0.123416725572523
ALG1L	14.0639376369883	1.53390301258682	0.513488193412729	2.98722158029038	0.00281525594213281	0.123416725572523
LINC00883	288.686148496769	-0.788471549737723	0.263974453831229	-2.98692369013037	0.00281800053306404	0.123416725572523
CRP	16.6126978026138	3.02044923606759	1.01122782917595	2.98691269061389	0.00281810192312859	0.123416725572523
RBP5	316.847700945436	1.77287157380401	0.593611106856497	2.98658760479122	0.00282109996593253	0.123416725572523
FLJ43681	6.58524319360212	-1.66505277176718	0.557570786902769	-2.98626257128054	0.00282410043780098	0.123416725572523
NAGLU	3620.25648832408	0.668181451452062	0.22381384847701	2.98543390410759	0.0028317632773926	0.123530616256114
KCNK6	1180.02816114243	1.08889869736602	0.364846680081105	2.98453777110966	0.00284007134898963	0.123672197833276
PDCD6IPP2	23.6842113106613	1.24320739645903	0.416989061613869	2.98139090662825	0.00286942261311577	0.124234492477847
TECRP1	57.2084440258427	0.821122509316629	0.275429453156454	2.98124438002714	0.00287079601144223	0.124234492477847
RP11.10K16.1	71.3080735592605	-1.01374836613451	0.340071639501867	-2.98098473492068	0.00287323114691488	0.124234492477847
SNRNP25	1336.05929265525	0.663090278578861	0.222440768238542	2.9809745930556	0.00287332630275425	0.124234492477847
IL12RB2	49.8448327601754	1.42467275975138	0.478068696392668	2.98005866207397	0.0028819318777934	0.124311418882407
OSCAR	957.057161521523	1.73678391131607	0.582871547416266	2.97970267894329	0.00288528284032603	0.124311418882407
NUDT16L1	1209.72968683712	0.607963721711581	0.204213433102441	2.97709955939385	0.00290989498698762	0.12515109971324
RP1.283K11.2	3.76802185096477	3.05259580556848	1.02584948990611	2.97567609635198	0.00292343453659976	0.12551244691493
SLC5A2	9.95831837067007	1.29360843479922	0.434947514098534	2.97417134911171	0.0029378097297962	0.125861008079099
RP11.342A23.2	6.44163180785616	2.41508054595917	0.81251594301637	2.97234850185643	0.00295531019430962	0.125861008079099
HRH2	118.397185317348	1.70834135547549	0.574793457963085	2.97209603172833	0.00295774155001128	0.125861008079099
CTC.378H22.2	38.4848208142634	1.48485326704616	0.499675593726174	2.97163456788701	0.00296219028924288	0.125861008079099
ASXL1	4146.65155979144	-0.446361704261572	0.150216251814499	-2.97146080314119	0.00296386704894525	0.125861008079099
PPP1R12A	3251.41853483028	-0.545950384920564	0.183732362777367	-2.9714437710797	0.0029640314480632	0.125861008079099
RP11.535M15.2	14.3416766325292	1.78891578734787	0.60211113723706	2.97107240958333	0.00296761802175943	0.125861008079099
FBXO39	44.2040072230708	1.30245547337368	0.438553449527345	2.96988992967086	0.00297906469391704	0.12591839493955
PRSS36	333.073246039759	1.11936531446921	0.376907464906605	2.96986772269576	0.00297928004728233	0.12591839493955
DLX3	124.384026722477	2.29959229058273	0.774660484149508	2.96851632119512	0.00299241210102446	0.126254983101773
TMEM219	5441.39998130633	0.890699460022708	0.300303586704383	2.96599674282114	0.0030170368477804	0.126838585332499
DESI2	2569.08798759831	-0.526158194994462	0.177414591486378	-2.96569854027401	0.00301996348923337	0.126838585332499
CTSG	291.998252382592	2.39561962946914	0.807827347309171	2.96550944635486	0.00302182065019095	0.126838585332499
PLA2G15	3001.42048645424	0.685831976233169	0.231374516944698	2.96416383830676	0.00303506647438351	0.127176053006372
NEK7	3119.75125533822	-0.789096537769066	0.266409862980364	-2.96196442932455	0.00305683096223023	0.127579041795739
MIR3936	6.33050832438397	1.41077690190804	0.476395696395753	2.96135526114424	0.00306288417178212	0.127579041795739
SLC27A3	2868.9658821053	0.8918336191013	0.301163997773164	2.96128895118807	0.00306354374281526	0.127579041795739
RP11.702B10.2	94.3683257998483	3.36238747118936	1.13566845216433	2.96071222616197	0.00306928576879939	0.127579041795739
SLC22A2	15.970312578059	2.27773035797078	0.769357763575491	2.96056069855632	0.00307079604469665	0.127579041795739
CYP2T1P	159.491626250272	1.53402055833616	0.518251635887757	2.95999173395451	0.00307647296754994	0.127592530749694
RP11.160E2.6	2.15714212848291	2.56115567554553	0.865273917791524	2.95993629633779	0.0030770266153848	NA
RP11.148K1.12	64.2933774652227	0.791329135186752	0.267387713963293	2.95948203250425	0.00308156670933397	0.127592530749694
CCDC129	2.17507603346809	2.96128773588114	1.00151604677731	2.95680508106686	0.00310844551850432	NA
RNF208	179.287508896751	1.36857836236882	0.463154199195951	2.95490867781121	0.00312761614444565	0.129131646711314
TUBGCP6	1849.10083095751	-0.594603017898823	0.201236896415012	-2.95474154338263	0.00312931085402995	0.129131646711314
GRPR	14.8688028946273	-1.72535369622185	0.584212605648217	-2.95329761723898	0.00314398687080039	0.129321572131037
SIGLEC15	916.176306617524	2.51489953997553	0.851570970062114	2.95324714955007	0.00314450095566074	0.129321572131037
AIM1L	27.4920257473877	1.58645288118266	0.537382594598291	2.95218508587644	0.00315533736750527	0.129358842373705
GALNT6	659.812588888235	1.32705312130941	0.44953452971977	2.95206048384463	0.00315661093128541	0.129358842373705
KIAA1644	783.53046920019	-1.82463475908798	0.618260787072833	-2.95123804911961	0.00316502883882276	0.129358842373705
UNC5D	7.58985495833173	2.61260376629192	0.885302514261162	2.95108589912037	0.00316658838836937	0.129358842373705
RP11.70D24.4	3.29876294780823	2.27083590961377	0.769712091010982	2.95024066288361	0.0031752648876292	0.12949565136734
DTX1	167.951088457938	1.56809443366216	0.531606470891317	2.94972788994275	0.00318053914693208	0.12949565136734
RP11.661A12.5	14.4545710762582	-1.38347289834028	0.469306879511306	-2.94790670825219	0.00319933598803017	0.129864773313734
MAPK13	1281.09377428614	0.96705136843501	0.328056491287237	2.94781964118578	0.00320023715808539	0.129864773313734
SMIM2.AS1	8.6933779184582	1.38885948499918	0.471329252336296	2.94668637288022	0.00321198794203852	0.129935928433112
RP11.432J24.3	3.11628045861699	2.7686327922897	0.939594643506515	2.94662470824367	0.00321262846508656	0.129935928433112
MLYCD	530.888082860367	0.550560136255276	0.186925187547638	2.94535018783901	0.00322589325803631	0.130014546235257
RP11.798K23.5	53.1886278720914	1.34281887642061	0.455957104952491	2.94505527347914	0.00322896973199167	0.130014546235257
SUSD2	590.135505225142	-1.36360573756225	0.463038960959302	-2.94490497027982	0.00323053868618448	0.130014546235257
CTD.2015H6.3	105.801439626955	1.15110640457485	0.391048475316371	2.94364120367319	0.00324375813398222	0.130148946058727
IL12B	12.93425752598	1.98003756550561	0.672768764426299	2.94311756163959	0.00324925004314959	0.130148946058727
GYLTL1B	31.6442018622407	2.00461503987879	0.681148226423651	2.94299384790879	0.00325054877785322	0.130148946058727
CPT2	1103.0092070491	0.421682404367016	0.143312515528052	2.94239761833275	0.00325681457275156	0.130148946058727
TEKT1	6.88809930437323	1.6031831666938	0.54492120251532	2.9420458578114	0.00326051639395558	0.130148946058727
PEAR1	666.618897926327	-1.44529933271185	0.491572560532869	-2.94015461551624	0.0032804850466279	0.130679450456498
ABCA7	921.427646251936	1.12281055218976	0.381937566234594	2.93977511366375	0.00328450540670062	0.130679450456498
RP1.225E12.2	3.51494475050877	-1.14603905652678	0.390290574263192	-2.93637390216335	0.00332073797495654	0.131906191854005
EIF3A	9323.54930536939	-0.668952193349622	0.227866179883223	-2.93572391344976	0.00332770349441707	0.131968293287524
RP11.394I13.1	48.7588982640868	1.20773733751685	0.411486014609434	2.93506290526832	0.00333480074714406	0.132035409160425
LINC00540	12.472046795472	1.80285583734728	0.614359965769045	2.93452688618879	0.00334056610920529	0.132049659355625
RP11.38L15.3	10.1663995589189	1.7601697830631	0.599917643028752	2.93401903330711	0.00334603689154879	0.132052237841107
LINC00173	24.8591425884864	1.28609680784361	0.438587142536071	2.93236322525766	0.00336393059398221	0.132055600159849
DHX33	1342.64347279779	-0.52617747836412	0.179445324038319	-2.93224402019949	0.00336522215499214	0.132055600159849
SREBF2	5852.56693317005	-0.81289993148192	0.27728303407501	-2.93166126875984	0.00337154264253763	0.132055600159849
DIRC3	113.228578535608	1.23077347849067	0.419987162196341	2.93050261835215	0.0033841414171619	0.132055600159849
MT1F	654.508547464593	1.47968692928852	0.504931483359552	2.93047072336122	0.00338448883800038	0.132055600159849
UBQLNL	20.9836983231054	0.978968908605747	0.334156678902999	2.92967033255058	0.00339321785114941	0.132055600159849
CTB.193M12.5	670.430115899501	0.849875360875709	0.290122278838072	2.92936952060154	0.00339650378369418	0.132055600159849
RNF17	9.00492017295263	-2.82263241151927	0.963708962962453	-2.92892617999781	0.00340135191569738	0.132055600159849
FER1L5	20.8502326812002	1.58520198322068	0.541244814124185	2.9288077074434	0.0034026485335081	0.132055600159849
GABRR1	7.92088610769241	2.34094733018841	0.799306961463847	2.92872130864619	0.00340359440518465	0.132055600159849
RASSF1.AS1	16.2078873521596	1.08526016767513	0.370650780297177	2.92798565486628	0.00341165785403005	0.132055600159849
ACSM2A	4.04747786377117	3.24716093315766	1.10908389894459	2.92778655992364	0.00341384310774955	0.132055600159849
RS1	5.26723814959166	1.84022770429715	0.628588792597772	2.92755411163478	0.00341639605800584	0.132055600159849
CST7	1220.11724019517	1.91799107642802	0.655401102203904	2.92643858848945	0.00342867190883889	0.132320736273341
RPL26P37	5.28316388698454	1.27832575011401	0.436950079228959	2.92556475185847	0.00343831613526133	0.132483635438958
RP11.271M24.2	6.81362307007166	1.62419508101888	0.555498996259011	2.92384881333173	0.00345732623014723	0.133006334608294
SERPINE1	23006.9468265342	-1.66311049853366	0.569002899409001	-2.92285065728322	0.00346842830204634	0.133177113080811
SLC8B1	3221.16308366244	0.74858017806642	0.256153458371434	2.92238950364256	0.00347356847080429	0.133177113080811
SSFA2	3004.20754295799	-0.642769348352161	0.21997720138931	-2.92198166124773	0.00347812019098439	0.133177113080811
SLC35F6	4127.46443225448	0.426086770624496	0.145856505050614	2.9212736893472	0.00348603439461131	0.133271258569577
RP11.397E7.4	20.3739414028317	1.0468284713892	0.358515186615339	2.91989993861089	0.00350143790779412	0.133650979139848
RHOXF1	21.4458757437978	1.9061741972485	0.653216931821176	2.91813347816025	0.00352133579252694	0.134200798869954
RP11.227D13.5	2.43481233915073	-1.69891570356992	0.582290867604527	-2.91764099024779	0.00352690162010329	NA
HLX	1709.61848590721	0.88341795347937	0.303029834076715	2.91528375802009	0.00355365276895464	0.135013004690441
SOX3	5.20189129400088	2.91812483065683	1.00099307145279	2.91522979916495	0.00355426727864538	0.135013004690441
ASIC3	222.667710062438	1.17097349668829	0.401819705188131	2.91417638699437	0.00356628343123873	0.135013004690441
RP11.333E13.4	4.25982447017106	1.47628072555424	0.506640911492328	2.91386007735895	0.00356989874679501	0.135013004690441
C19orf81	10.1190109361158	2.16197675829734	0.742005831094008	2.91369241008488	0.00357181648056536	0.135013004690441
COX5B	4938.68451077745	0.75507705365652	0.259178845080095	2.91334369293596	0.00357580801648514	0.135013004690441
RP4.612B15.3	73.3049984003571	0.859617600781678	0.295175561840915	2.91222483128522	0.00358864230042469	0.135274823360816
ZNF185	648.80950037068	1.03569989884655	0.355723427847893	2.91153131271806	0.00359661856223309	0.135274823360816
HIGD2A	2984.33864369195	0.581907685256754	0.199879413732302	2.91129373651306	0.00359935466799829	0.135274823360816
TXNDC11	2638.45271705845	0.613826553919746	0.21088742045811	2.91068358931193	0.00360639025767065	0.135313359669545
STAP2	525.329376627676	1.41685471712224	0.486872321307962	2.91011555825544	0.00361295144775894	0.135313359669545
DSCC1	458.769480674737	-0.547847502290429	0.188298898821653	-2.90945675051091	0.00362057477411428	0.135313359669545
XPNPEP3	1183.42728882875	-0.611457281910904	0.210174241320088	-2.90928744678885	0.00362253621613176	0.135313359669545
C5AR2	512.892779142451	1.44321584463401	0.496466937440966	2.90697272223817	0.00364945019986144	0.135969013101013
AR	793.783899701773	1.95586223631972	0.672855231467579	2.90680988249693	0.00365135041415956	0.135969013101013
DUSP9	41.1286376075732	2.57991012523054	0.887725048241856	2.90620404407881	0.00365842798474513	0.135969013101013
RP11.513M16.7	23.9520941460766	-1.08971618460512	0.375005325196234	-2.90586856075947	0.0036623525572257	0.135969013101013
RP11.1E11.1	3.37836374964775	2.33957038335674	0.805300935691487	2.90521254808654	0.00367003783046578	0.136047578392183
CCR7	179.493317364313	1.66676036506801	0.574041927847997	2.90355161219053	0.00368956151624024	0.136449049115647
SLC25A47	7.66252826790459	1.81726706508947	0.625945699563898	2.90323436418778	0.00369330137208922	0.136449049115647
RP13.977J11.2	48.7582439336365	1.11623459007867	0.384528194741152	2.9028679960128	0.00369762456566206	0.136449049115647
TBX5	205.519527711663	2.81033722787368	0.968490266071832	2.90177126846336	0.00371059361197397	0.136712386413083
LAGE3	2106.88875884953	0.957639894303366	0.330070523603725	2.90131903887633	0.00371595335782419	0.136712386413083
MTND6P4	9.65410784177533	1.69287816523573	0.583720363483441	2.90015266065624	0.00372980956800844	0.137004739002618
IQSEC2	1663.59213284776	0.638159798553371	0.220130498333446	2.89900674093195	0.00374346845919047	0.137004739002618
PEX16	1685.84296756615	0.69291238952756	0.239021908572969	2.89894927901987	0.00374415457710915	0.137004739002618
ENSG00000188603	1258.36698418016	0.720731882175352	0.248698037657445	2.89801998023033	0.00375526665540613	0.137004739002618
SLC25A32	1619.07789865723	-0.602050175199817	0.2077524801892	-2.8979205189345	0.00375645773658529	0.137004739002618
SPRY2	1253.1546458158	-1.07291801716056	0.370353792427749	-2.89700831771522	0.00376739766744414	0.137004739002618
SF3B5	6051.358355255	0.736344507312779	0.254178504341178	2.89695821926941	0.00376799933068251	0.137004739002618
TASP1	356.697527480889	-0.665038640312085	0.229569514917973	-2.89689439187825	0.0037687659998264	0.137004739002618
RNU4.1	5.87753753854475	2.15441547624758	0.743873978977013	2.89621029520399	0.00377699200333461	0.137025607668808
RGS10	2871.29118795367	1.11245023397149	0.384170713728458	2.89571847675457	0.00378291601284923	0.137025607668808
APOA1BP	3832.34901633623	0.398600900987437	0.137684171545782	2.89503794453887	0.00379112702715242	0.137025607668808
KCNK5	439.594220295108	1.42862721598796	0.493571034840937	2.89447134280958	0.00379797575666163	0.137025607668808
ZC3H11A	4508.25888553953	-0.499304732155722	0.17251552616132	-2.89425968355347	0.00380053704527979	0.137025607668808
CA5BP1	603.63912234272	0.693920978331249	0.239774493537168	2.89405669508247	0.00380299488310827	0.137025607668808
RMDN2.AS1	6.88902712725546	1.7776003255225	0.614678707486692	2.89191784890481	0.00382898052543719	0.137758711717091
RP11.60L3.1	3.51829152415699	2.9018680743258	1.00364987423544	2.89131513769816	0.00383633216928512	0.137820233181568
CTD.2616J11.11	17.7488346028582	1.24027714043233	0.429165861714437	2.88997157294304	0.00385276664526998	0.138068491048033
KNG1	7.50171352964834	-3.12903614449776	1.08291922135846	-2.88944556785369	0.00385921813977035	0.138068491048033
CDH17	19.9898884095588	-1.46057190014059	0.505499141298924	-2.88936573935126	0.00386019810003711	0.138068491048033
LMAN2	9518.76926962284	0.512854313540331	0.177538894082874	2.88868710256206	0.00386853805671694	0.138164497350202
HMOX2	2756.09592981972	0.582940183061135	0.201962423645028	2.88637941920185	0.00389702043343227	0.138966553160365
CLRN3	13.0704731109844	2.25736811132	0.782205823223087	2.885900416873	0.00390295629606073	0.138966553160365
IGDCC3	29.1928529910589	1.72273790924266	0.597100736130848	2.88517130359917	0.00391200733283366	0.138966553160365
WDR66	133.079036842883	-1.23108402453666	0.426714294779728	-2.88503113112758	0.00391374958345946	0.138966553160365
PPFIA4	186.733507263069	-1.53110853825818	0.531037249051898	-2.88324131874325	0.00393605779457801	0.139555814025757
KRT223P	7.76671793046984	2.63105466237393	0.9128951520574	2.88209950117963	0.00395034967143671	0.139674643356565
PEX2	1371.67097696926	-0.497206153577743	0.172525773795908	-2.88192391570387	0.00395255161163191	0.139674643356565
RP11.53M11.3	5.6653514933979	-1.64803490287255	0.571979078172205	-2.88128528780974	0.00396056976538875	0.139674643356565
LINC00162	16.7329006547763	2.99576502285062	1.03978126635435	2.88114925685695	0.00396227957943834	0.139674643356565
RP11.566K19.6	15.244491213679	2.5235844651677	0.876846142719893	2.87802425330832	0.00400174371788884	0.14051933661643
PPARGC1A	363.717126295705	2.03966130174422	0.708743622755635	2.87785489175043	0.00400389266152622	0.14051933661643
AP001469.9	32.8055406159432	-1.21137118027623	0.42101175555481	-2.87728588167302	0.00401112021956419	0.14051933661643
ENOX1	458.640747508746	-0.805959699629324	0.280164094486942	-2.87674157927074	0.00401804502332217	0.14051933661643
TAS1R3	58.3320726811392	1.19783501827588	0.416406219845553	2.87660212837399	0.00401982091157287	0.14051933661643
ACP5	10753.9681634936	2.16678144269571	0.753262551330834	2.87652882632692	0.00402075468888962	0.14051933661643
PRRT3.AS1	66.7039216598454	-1.30321210616344	0.453364370169108	-2.87453578603306	0.00404621913899943	0.141114789359434
CTD.2249K22.1	2.02456086300253	1.76324079779533	0.613536898717227	2.87389528075962	0.00405443370286355	NA
PRKDC	11357.8262080476	-0.810563905914092	0.282051212874249	-2.87381818944872	0.00405542342896166	0.141114789359434
HS1BP3	2049.90487429502	0.443018430613641	0.154163113074807	2.87369930314437	0.00405695016415731	0.141114789359434
SLC22A20	19.6192109987374	1.1753469345873	0.409141621223754	2.87271417430426	0.00406962125254997	0.141114789359434
RP1.100J12.1	6.72238737455992	1.29251915670134	0.449931524148055	2.87270192758492	0.00406977900014344	0.141114789359434
BLOC1S5.TXNDC5	18.2094776607645	1.24067362617135	0.431922144003082	2.87244736903904	0.00407305917576513	0.141114789359434
WWTR1	5323.83871240266	-0.717730913958935	0.249902253232056	-2.87204658892154	0.00407822838788981	0.141114789359434
HOMEZ	591.125926991897	0.483041327778821	0.168301513754971	2.87009496826082	0.00410348534137682	0.141787897318945
RP11.2C24.4	4.09284027232071	1.25979287940602	0.439157672729828	2.8686573357015	0.00412218120874495	0.142232718571229
CTB.133G6.1	10.0581251116019	1.5027576562352	0.523937043084346	2.86820272792447	0.0041281092764229	0.142236363206961
LYPD3	177.774246995093	1.41141352492466	0.492385120978913	2.86648289070682	0.00415060594125939	0.142789450591095
SYN3	23.6636582253203	1.63061604391397	0.568935371812943	2.86608308201672	0.00415585162594739	0.142789450591095
FAM91A1	2974.39148324961	-0.518951560130795	0.181115989032044	-2.86529954039	0.00416614952270273	0.142942228497339
FZD6	915.358411429554	-0.968409424804049	0.338125968433513	-2.86404924558307	0.00418262979547158	0.143105624133091
WNK4	91.474235642051	1.90084820788541	0.663774955279303	2.8636937756797	0.00418732606866328	0.143105624133091
RB1CC1	2777.22489364639	-0.588318408704954	0.205455759585637	-2.86347975783922	0.00419015586135169	0.143105624133091
ZNF92	437.457224941409	-0.722054090624799	0.252211722281367	-2.86288870356024	0.00419797992946558	0.143105624133091
HOXA5	330.154011212644	-0.914276108159877	0.319398891343362	-2.86248992385201	0.00420326625181662	0.143105624133091
OSR1	708.593270898003	1.79310480307233	0.626460444868083	2.86227936298503	0.0042060599339948	0.143105624133091
FAM216A	528.97220655889	-0.623279233663124	0.217855470025684	-2.86097582764226	0.00422339251899566	0.143495487964597
RP11.521D12.5	10.3046923798905	1.76661250456655	0.617601895991554	2.86043892681104	0.00423055029121629	0.143539045922393
ARFGAP3	3842.38512015087	-0.586584865344187	0.205275700800124	-2.85754652429779	0.00426930042471269	0.144616421845972
CTC.347C20.2	17.2415782946099	-2.45664376339282	0.859812127667796	-2.85718668571978	0.004274143705137	0.144616421845972
PCAT4	5.70733137885376	-2.10007540385467	0.735278059724661	-2.85616492438396	0.00428792336866887	0.144810178354485
SMYD1	5.79547354283489	-3.43897200194541	1.20420104910394	-2.8558121623498	0.00429269013000901	0.144810178354485
RP11.290F24.6	27.8286885176342	0.891117232193731	0.312121265200638	2.8550353069372	0.00430320447720315	0.144810178354485
RP11.973D8.5	5.80226747442023	1.45714253154618	0.51038133381268	2.85500749147887	0.00430358137808982	0.144810178354485
SDR16C5	4.96895339721133	2.30262957559393	0.807902030200709	2.85013465682452	0.00437007233507768	0.145917409862281
SLC12A2	1274.83081956724	-0.597071330109531	0.209495516425014	-2.85004347729439	0.00437132532824926	0.145917409862281
ABALON	43.4779195448053	-1.0404931371139	0.365090691044367	-2.84995800396196	0.00437250020231602	0.145917409862281
LINC00861	94.7062373433138	2.05915699475442	0.722526740859101	2.84993880268851	0.00437276417287508	0.145917409862281
NFKBIE	2226.97686839235	0.943764456930603	0.331187341917844	2.84963927505634	0.0043768838161062	0.145917409862281
HSD3BP4	6.92272124979733	-1.99738988399543	0.701004021642573	-2.84932728248149	0.00438117864015134	0.145917409862281
POMGNT2	2035.09691969834	0.902243091206946	0.316700495397104	2.84888436968071	0.00438728224535825	0.145917409862281
TAF2	1445.2712431732	-0.7339035406495	0.257628399752691	-2.84869036703254	0.00438995814525233	0.145917409862281
AMOTL2	3103.82474503481	-1.04695049017797	0.367522614797376	-2.8486695730416	0.00439024504682045	0.145917409862281
RP11.295K3.1	29.0289204605493	1.05298633050114	0.370026361122471	2.84570625537845	0.0044313051321558	0.14708200145847
SYNGR4	4.95009326685226	1.60633408858901	0.565258522660931	2.84176889722469	0.00448640001170498	0.148560643654901
LINC00334	9.47245082437935	1.5970845340989	0.562026380687	2.84165403792377	0.00448801649749547	0.148560643654901
RP1.60O19.1	2.14652871397144	2.49986472895871	0.880012400772857	2.84071534306022	0.00450124712161691	NA
SLC38A2	11330.0574590308	-0.680905102181057	0.239863927804489	-2.83871405097668	0.00452957278816236	0.149202340124004
LZTR1	4436.97142706898	-0.615631396312281	0.216935086302655	-2.83785996449366	0.00454171034782909	0.149202340124004
XRCC6	18392.8478944459	-0.469417283829707	0.165437805883048	-2.83742450115392	0.00454791012031383	0.149202340124004
CTD.2575K13.6	18.3998935407986	1.22959346099206	0.433369857289111	2.83728422803475	0.00454990884662125	0.149202340124004
CETP	530.056615651688	1.54704279055968	0.545319160131362	2.83694926506344	0.00455468489237432	0.149202340124004
OTUD6B.AS1	892.26045037336	-0.520355347470113	0.183424018562698	-2.83689863272865	0.00455540722488999	0.149202340124004
RP5.1112D6.4	38.1575556243038	0.653741665924302	0.230475323619954	2.83649310328033	0.00456119634588096	0.149202340124004
RP11.547D13.1	14.3891420311934	-1.21365802508775	0.427882578010742	-2.83642776653852	0.00456212968123077	0.149202340124004
RGN	201.212107664681	2.11621245784304	0.746088110245157	2.83641091284469	0.00456237046431007	0.149202340124004
ATP6V0D1	6036.50318070032	0.551547377125638	0.194576187685742	2.83460881665765	0.00458818292423339	0.149845883230077
ANKRD36BP2	45.6621088247589	2.37222927792699	0.837013104327438	2.83416026064866	0.0045946283739029	0.149856043452702
FDFT1	3547.48991832738	-0.67022703909309	0.236601189330486	-2.83272895199573	0.00461525018950863	0.149966003749949
AC069368.3	7.93886851679488	-1.18434891624162	0.418125868162423	-2.83251768527641	0.00461830113834337	0.149966003749949
KIF17	233.381485087773	1.27782598775048	0.451194732115039	2.83209420854824	0.00462442215848693	0.149966003749949
RP4.583P15.16	5.4398848034085	1.49582677976171	0.528206785414141	2.83189618359201	0.00462728697220409	0.149966003749949
AC005682.6	120.983089096169	-1.19560715961425	0.42231185977617	-2.83110012645142	0.00463881970012526	0.149966003749949
GHRL	37.7606073655365	1.44059449424957	0.508870500487516	2.83096483853834	0.0046407822437334	0.149966003749949
RHOF	99.4041685521666	1.07374222084943	0.379348197926343	2.83049247820049	0.00464764039880707	0.149966003749949
TM4SF19.TCTEX1D2	5.07463336629133	2.97233496204679	1.0502410849843	2.83014538713388	0.0046526856287823	0.149966003749949
RN7SK	255.464719658611	1.51043197336022	0.533701438269119	2.83010661964637	0.004653249451163	0.149966003749949
HAPLN2	6.04079837394897	1.35758129644969	0.479860576880988	2.82911612634181	0.00466767587882905	0.150044526415245
ZNF239	195.782476698454	-1.00704702295611	0.35600324403349	-2.82875799542258	0.00467290197648389	0.150044526415245
RP11.217E13.1	3.37431274685603	2.39141020781387	0.845417061416068	2.82867512019249	0.00467411210454794	0.150044526415245
CPLX1	116.145564043654	1.29186719918353	0.457171185333029	2.82578439024424	0.00471649993758233	0.150674514480777
NECAB2	35.2030021964172	1.46766632444071	0.519467935943341	2.82532611329603	0.00472325168372902	0.150674514480777
ZRSR2	1056.01469454113	0.451811376940008	0.159916950696738	2.825287594414	0.00472381957676335	0.150674514480777
CEP170	1526.56248117823	-0.613067283449781	0.217021556912045	-2.82491422590912	0.00472932744133109	0.150674514480777
AURKAIP1	7861.01616796486	0.82700477061697	0.292758168903623	2.82487342270959	0.00472992971495431	0.150674514480777
FAM78A	990.706283604378	0.924434867331106	0.327254636525018	2.82481824290497	0.00473074430417766	0.150674514480777
LILRA4	24.1160818784754	1.93057458785078	0.683549919036166	2.8243359176649	0.00473787001533101	0.15070498255797
MIXL1	8.9607839605387	1.67210338825264	0.59236478642897	2.82275960111133	0.00476122579562556	0.151250955736459
LMO7	2017.11150209707	-1.2097044536848	0.428833982568242	-2.82091555907021	0.00478868059991832	0.151740616847836
KRT16	51.9848046129778	2.43033249789933	0.861548141608082	2.82088995440593	0.00478906281835858	0.151740616847836
SCN2B	106.93854829268	2.99972860690128	1.06393274656563	2.81947201699016	0.00481027249248624	0.152027177230509
UCN	53.6686800615179	0.93885944354943	0.332993439129069	2.81945327813359	0.00481055335867957	0.152027177230509
IGSF9	191.225015130436	1.64136095250844	0.582354608117775	2.81849053760127	0.00482500331722325	0.152257920341122
MYO5B	708.231986153377	1.73320862781527	0.615097452288481	2.8177789086377	0.00483570952556436	0.152257920341122
DYNC1I1	230.863130189737	1.74942939129003	0.620878313285884	2.8176687023122	0.00483736946185776	0.152257920341122
XRN2	4035.48762766076	-0.489186377234485	0.173647925018628	-2.81711616871902	0.0048456995405371	0.152257920341122
TMEM27	24.7710742892704	1.1511304627262	0.408652056617867	2.81689629131764	0.00484901805335433	0.152257920341122
RAB37	269.218472522959	1.66249409723478	0.590768257822333	2.81412224712783	0.00489106245225659	0.15260646751435
TSPAN7	412.740672177709	1.28276206592096	0.455841851110769	2.81405066865888	0.00489215167206552	0.15260646751435
SFRP5	14.1000031530238	2.75100475596587	0.977659083308581	2.81386917273448	0.00489491450516214	0.15260646751435
GPC5	25.2695199750011	-2.16025851531976	0.767723256464401	-2.81385056025059	0.00489519791464423	0.15260646751435
SNHG17	1658.42898051987	-0.849710788362901	0.301981198904847	-2.81378705510287	0.00489616500966624	0.15260646751435
MYH15	60.3251718333997	-1.28568284162152	0.456937879187277	-2.81369284575022	0.00489760000537274	0.15260646751435
SCTR	12.198733959389	1.18995756949648	0.4230070315501	2.81309170000297	0.00490676561250704	0.152697295729853
FLJ43879	44.7969808052168	2.15393557558518	0.765848249712775	2.81248351274942	0.00491605436735077	0.152791720279914
RAX	2.06585217924302	2.18719208848478	0.778008392924809	2.81127055745807	0.00493462716263342	NA
TCF23	98.3318235604888	2.5002400212845	0.889448881824996	2.81099911684013	0.00493879214702968	0.153303371486389
LTC4S	2.92853444489848	1.49896840553364	0.533337282307186	2.8105449501846	0.00494576799021945	NA
RPS3AP5	67.9799720019789	1.41436437522444	0.503345406128503	2.80992804941455	0.004955257646082	0.15361927542657
MYOT	30.6078962733466	-1.6030978413444	0.570801755814409	-2.80850194487774	0.00497725817923449	0.154105754195842
ASTN2	763.372947026094	1.58728772462993	0.565267199798608	2.80803083072119	0.00498454544998927	0.154136026326314
PIK3R3	1642.75054035266	0.66694522689725	0.237616538123831	2.80681316276765	0.00500342525312558	0.154450493378446
THBS4	4229.96883649498	-1.87396404755349	0.667791705417849	-2.80621042811682	0.00501279448929297	0.154450493378446
LINC01482	11.2840017469079	1.54479454132607	0.550642000584154	2.80544262821808	0.00502475256347243	0.154450493378446
C12orf29	839.372824029393	-0.496502492286348	0.176991948965635	-2.80522642520169	0.00502812446087807	0.154450493378446
DERL3	449.82103571029	1.48093171355583	0.527977441786177	2.80491474890624	0.00503298895783869	0.154450493378446
GYPC	5236.93859152176	0.693708872628531	0.247332432908259	2.80476306512475	0.0050353579058409	0.154450493378446
PAPPA2	266.64853842396	1.7506079691453	0.62420685555531	2.80453178872558	0.00503897184586442	0.154450493378446
SDF2	2039.14126203809	0.386435387661011	0.137856796256475	2.80316530018635	0.00506037258519237	0.154557239368359
AC002429.5	27.0207408457076	2.67876563842325	0.955627965073851	2.80314697385005	0.00506066015364538	0.154557239368359
RFXANK	2958.52474322097	0.692474923186201	0.247039175825599	2.80309760940533	0.0050614348313352	0.154557239368359
CALB2	68.8926518675106	1.94820749003002	0.695237086924213	2.80222031688363	0.0050752201025679	0.154784708970825
MIOS	1370.18466928936	-0.543579875200269	0.194238256015091	-2.79852118914225	0.00513372009918709	0.156342992353584
RP11.54O7.17	136.54371672814	1.67169620705802	0.597506631036657	2.79778687000958	0.00514540525770652	0.156342992353584
PRSS45	3.11674018283929	2.64273624027695	0.944583280220149	2.7977800323345	0.00514551417791482	0.156342992353584
TUNAR	1.50255802482117	2.94493245727473	1.05262629349825	2.79769988215634	0.00514679107925736	NA
LRFN2	3.90783788371628	3.86232946966316	1.38091941515596	2.79692603874859	0.00515913419472764	0.156526718608953
RP11.350N15.4	35.2300052211146	-1.24890403913979	0.446680416242774	-2.79596775172028	0.00517445633155978	0.156526718608953
HCN2	128.1562586184	1.45100679036707	0.518981062711722	2.79587617857467	0.00517592265307009	0.156526718608953
ABCC9	1577.31892107853	-1.69807315716466	0.607366396216029	-2.79579701436214	0.00517719057824856	0.156526718608953
LSR	348.587562310868	0.959834752795197	0.34361273595054	2.79336198101038	0.00521632837925176	0.157450288342229
MOB2	2031.80501049983	0.589993629534702	0.211249987874961	2.79286941253658	0.00522427776413394	0.157450288342229
PLK4	745.113989500629	-0.807464567798074	0.289161925764915	-2.79243045453547	0.00523137117010017	0.157450288342229
RP11.291L22.6	62.2216575319706	0.80420005332503	0.288037488812744	2.79199786333316	0.00523837020257913	0.157450288342229
XKRX	7.89195679813588	1.47492168087536	0.528286109172692	2.79189941826242	0.00523996415826403	0.157450288342229
KNDC1	9.89284854481541	1.93012401564844	0.69143658982972	2.79146930324264	0.00524693342889655	0.157466015644366
PLEKHO2	6460.37751226958	0.723694790715998	0.259388837808426	2.78999974258912	0.00527080834636235	0.157831796743266
CHL1	634.613318528429	2.28723260615482	0.819818997085226	2.78992389086715	0.00527204331501515	0.157831796743266
MYLK3	13.6609982136508	1.30555800159942	0.468179513407974	2.78858421654549	0.00529389814362568	0.158292090270051
HCG4	29.55553423076	1.63489205972441	0.586418293755003	2.78792813446479	0.00530463098601676	0.158419108016386
RP11.4K3__A.5	9.40628730703279	-0.994992777203015	0.356945417223908	-2.78752080623819	0.00531130435045886	0.158424730131086
TTC39C	796.422220392811	0.695710671588605	0.249685958712483	2.78634279306722	0.00533064674229929	0.158681156667075
RP11.93B14.6	3.09655310149783	1.76093170825202	0.632052846091188	2.78605138659239	0.0053354412962148	0.158681156667075
ST13P15	6.07898100231381	-0.978941893626984	0.351402752295823	-2.78581168539874	0.00533938805437537	0.158681156667075
BTBD17	3.42742516778544	2.79927882614972	1.00577939989559	2.78319363713387	0.00538266704978551	0.15970373579167
RASAL2	1709.34832335511	-0.812658862538615	0.292032846526583	-2.78276526837416	0.00538977849717781	0.15970373579167
PKD2	2444.3984138854	-0.660028786695948	0.237223932695045	-2.78230269263947	0.00539746734793047	0.15970373579167
RGS16	1152.23592652946	1.39727842434326	0.50222905761761	2.78215368694802	0.00539994620180604	0.15970373579167
ZFC3H1	1243.25753750204	-0.47729726708452	0.171680245415929	-2.7801525209157	0.00543333728129672	0.16045747954253
UGT3A2	28.0118796166218	2.23665189048852	0.804598884652316	2.77983468925019	0.00543865768051945	0.16045747954253
HKDC1	32.4583554134967	1.51134924213384	0.543758774425744	2.77944800749184	0.00544513694955822	0.16045747954253
RP11.46A10.2	2.3847743651477	2.29787368674566	0.826784726013034	2.77928899077102	0.00544780346725177	NA
DZIP1L	355.258207236464	-0.621071544924962	0.22355525471773	-2.77815677251315	0.00546682349711804	0.160902447242285
RP11.384L8.1	59.0738180879218	1.76079757407596	0.63426454055719	2.77612488399419	0.00550110737313107	0.16160792817384
CDHR1	75.4019440328135	2.0506714588595	0.738727124683317	2.77595256805901	0.00550402375212392	0.16160792817384
FCRL1	5.12077157907666	2.32003148270063	0.836296539458531	2.77417324266672	0.00553421983003089	0.162291722323757
ANGPTL6	52.31080097655	1.29115923428521	0.465484155961462	2.77379845854969	0.00554059914110334	0.162291722323757
RP11.370A5.1	8.43200938974251	1.65822057869083	0.598092688077064	2.77251438070945	0.00556250615705895	0.162738278935081
AC093627.8	18.8460839029826	-1.98570606992639	0.716439436736414	-2.77163144308729	0.00557761483542656	0.162985111022291
RP1.65J11.1	7.71564114139761	1.93534887310882	0.698394216898663	2.77114103507767	0.00558602259962724	0.163035777880877
LRTM2	3.22802539283693	2.76467241975265	0.997880588310238	2.77054434382195	0.00559626794980631	0.163045707490524
KCNH8	7.49448371404444	2.42036944024148	0.873671075545938	2.77034402075066	0.00559971135063039	0.163045707490524
IL27RA	873.019523660898	1.04684099960506	0.377988809992684	2.76950261999906	0.00561419527410189	0.163272828989327
RNPEP	3598.63865429231	0.50091757600908	0.180903030572579	2.76898388282174	0.00562314168095	0.163295340147518
AC007950.2	4.93121518176372	1.26515756163085	0.456952855443722	2.76868291019283	0.00562833830300913	0.163295340147518
H1FNT	2.86391887680974	2.2310564855666	0.806442388055382	2.76654168805098	0.00566543407645321	NA
RPL23AP67	3.58814744130563	1.39053885288163	0.502779926112671	2.76570081791613	0.00568006200595272	0.164600515709868
BMP4	864.180270653991	1.25176366724974	0.452710611854658	2.76504158389735	0.00569155397458675	0.164716976988738
RP11.288L9.1	7.18321150351707	1.64662720921788	0.595672461670646	2.76431649131418	0.00570421822441767	0.164716976988738
AC195454.1	3.67702446221418	1.77744805914917	0.642998513450091	2.76431130394383	0.00570430891696233	0.164716976988738
INTS8	1538.57640249732	-0.363851498086334	0.131669063453641	-2.76337879637491	0.00572063340682033	0.164993333524456
MAL	47.4846074798305	2.03751194643103	0.737612419660949	2.76230699500368	0.00573944840953182	0.165128907992621
SUSD4	161.877478531792	1.66937661540354	0.604368655845931	2.76218265003654	0.0057416348396219	0.165128907992621
CTD.2323K18.1	19.9506242866153	-0.743038702991731	0.269026211452296	-2.76195653568681	0.00574561266501813	0.165128907992621
C11orf21	104.050731371156	1.72289625972629	0.623959816000075	2.76122951437963	0.0057584193405488	0.165302498319937
CDS1	262.789172219858	1.33034243825882	0.481884565899267	2.76070771384056	0.00576762685818016	0.165363574451071
FAT3	140.818699515379	1.60364308735475	0.581030549221399	2.75999788565968	0.00578017356139183	0.165363574451071
FOXO6	210.875177453037	1.52131316932975	0.551208530824003	2.75995940602649	0.00578085441815933	0.165363574451071
UBA52P8	11.7793637580908	-1.39799924144749	0.506687756033938	-2.75909418532279	0.0057961826969416	0.165608125267353
BCO2	57.1631822299595	-1.25703603099035	0.45580492903523	-2.75783773038838	0.00581850734477599	0.166051770941043
CBR3	1163.88994185745	1.13672067140348	0.412318777370805	2.75689765732209	0.00583526119663016	0.166335584331946
MZT2B	4028.72271008193	0.711889142517416	0.258271430189612	2.75636039957953	0.00584485564727356	0.166414893481639
AGMO	95.4230371309193	-1.62555397395468	0.589925529407781	-2.75552403298523	0.00585981994356739	0.166502269093623
TMSB10	109025.670207954	0.909196739414131	0.329965808232109	2.75542712829982	0.00586155599576389	0.166502269093623
AOC1	25.0563475255342	1.33213253049441	0.483973539243114	2.75249042040135	0.00591438767617	0.16755250423847
ITGBL1	592.817495532997	-1.62214736626146	0.589368193248424	-2.75234969386567	0.0059169301031056	0.16755250423847
STAT5A	3037.55884465423	0.725429043142131	0.26358772482636	2.75213515204477	0.00592080800466127	0.16755250423847
ISM2	5.53593389432483	1.99294882659203	0.72423189147398	2.75181036633987	0.00592668295283152	0.16755250423847
RFX3	304.092564509056	-0.780895003032689	0.283809978546381	-2.75147127325219	0.00593282230816967	0.16755250423847
RP11.395A13.2	80.5335964474275	0.601867656990481	0.218845060377888	2.75019987177784	0.00595589237595177	0.168009809298067
ISLR2	163.575703012071	1.8025168283055	0.656066149182389	2.7474620212487	0.00600584641291104	0.169207589717194
NDUFA13	2671.63189801825	0.907672065058207	0.330409207331877	2.74711492572452	0.00601220630703361	0.169207589717194
ARAF	5238.36351445132	0.53006438598889	0.192981897453283	2.74670522460382	0.00601972114252744	0.169224128643041
E2F5	170.591376919749	-0.805656943887757	0.293386449265612	-2.74606051473894	0.00603156370132719	0.169321069553861
RP11.305L7.1	54.9519433425624	1.70202052236064	0.619958680155975	2.74537735633032	0.00604413541446784	0.169321069553861
TIMP3	1104.66435865651	1.50764859036842	0.549208009473781	2.74513219829579	0.00604865264823924	0.169321069553861
ATP2A3	1415.69637983662	1.24470136765025	0.453496883806454	2.74467457681907	0.00605709282940249	0.169321069553861
LINC00923	5.46036384437952	2.06182196192283	0.751290050634619	2.74437543819621	0.00606261575103137	0.169321069553861
GSTCD	362.844131953459	-0.624966231422207	0.227735831341542	-2.74425955608596	0.00606475647221043	0.169321069553861
PYCARD	1427.31243094061	1.02387019262898	0.3732853075952	2.74286228736141	0.00609062224580083	0.169654022277314
CITF22.1A6.3	34.4999851117926	-0.741117866024889	0.270244086549744	-2.74240178753539	0.0060991686098616	0.169654022277314
SKIV2L2	2582.12082305852	-0.646075955778687	0.235602824179942	-2.74222500527093	0.0061024523600022	0.169654022277314
ATXN10	4835.71003171924	-0.414865396372078	0.151293840627478	-2.74211689419383	0.00610446131981492	0.169654022277314
ATP6V0B	9737.14888053176	0.785992177756082	0.286692336632966	2.74158767892822	0.0061143039898685	0.169698292198011
ROGDI	774.323015187241	0.565998451048966	0.20647197764242	2.74128459228106	0.00611994741604028	0.169698292198011
CPED1	1062.60463112223	-1.11803082961083	0.40804046617948	-2.73999988304849	0.00614392062350825	0.170169883119822
UNC5CL	62.4827210521359	0.966567223777004	0.35284662085593	2.73934102424538	0.00615624798027406	0.170318212808737
DUOX1	250.202810354146	1.72114738000976	0.628501574108557	2.73849334816857	0.00617214090053536	0.170347198222048
RBP4	109.697156290872	1.69398990816633	0.618604043696989	2.73840742786367	0.00617375386467207	0.170347198222048
SLC25A17	1309.72823886078	-0.408210611113803	0.149098816952219	-2.73785278420164	0.00618417521219736	0.170347198222048
ARL4A	1421.91778938021	-0.877968252610633	0.320698119090847	-2.73767820996144	0.00618745860997321	0.170347198222048
NLRP9	4.05903206114078	1.58443460268626	0.578862684782904	2.73715104520943	0.00619738307003234	0.170347198222048
RP11.305L7.6	18.0551734299089	2.05809059119325	0.751935299148756	2.73705808667734	0.00619913460311109	0.170347198222048
ATP13A2	2713.17187555723	0.486360088934797	0.177744638372171	2.73628556894319	0.00621370770404324	0.170555803934913
PLAGL2	1002.38612632467	-0.439741451240982	0.16082375815811	-2.73430652459111	0.00625118205895908	0.171069562675473
RAC2	4152.10290534092	1.35611723923381	0.495983957613247	2.73419577068512	0.00625328524773622	0.171069562675473
ST13	10573.0789893339	-0.469484690406481	0.171709002322464	-2.73418798115665	0.00625343319289357	0.171069562675473
USP2	302.403489941014	1.21369022022823	0.444034987578618	2.73332114400859	0.00626991657900185	0.171328626519504
PACSIN2	3903.88704525479	-0.417799511799251	0.152903633634672	-2.73243677646986	0.00628677361095805	0.171597310102899
CTB.32O4.3	3.79156080213247	1.80476402928913	0.660608471722896	2.73197227486687	0.00629564386050434	0.171647638245826
RP11.96C21.2	4.54327846937546	-1.3365933880542	0.489456009202178	-2.73077327262336	0.00631859242639063	0.17179457084901
RP11.314B1.2	8.63909984625688	2.63610561510898	0.965534703316983	2.73020286692228	0.00632953623693331	0.17179457084901
TMEM199	649.276538488798	0.462380948754876	0.169400753088036	2.72950940492324	0.00634286398199969	0.17179457084901
LGALS8.AS1	4.5289996840084	1.39640819568156	0.511638852166748	2.72928490431853	0.00634718409970229	0.17179457084901
PADI2	165.318492345074	-1.55581978815918	0.570070330270549	-2.72917165750549	0.00634936433928071	0.17179457084901
ALG8	1621.41900752637	-0.693298795017335	0.254061654006391	-2.7288604324362	0.0063553595487735	0.17179457084901
ZADH2	1218.89919999166	0.655413700798377	0.240184401727115	2.72879377713722	0.00635664420931402	0.17179457084901
AF064858.6	8.55006303720338	1.34516964504906	0.492960013675457	2.72876015849565	0.00635729223658378	0.17179457084901
TRBV30	15.9935611015577	2.57330620951691	0.943312136381027	2.72794773889932	0.00637297038842686	0.17198644142788
DCAF13	2461.31945385036	-0.60747704244579	0.222710275048859	-2.72765610977095	0.0063786067564336	0.17198644142788
C19orf84	12.121529387537	1.29712373481622	0.47569587851643	2.72679203961491	0.00639533313846836	0.17198644142788
COL9A3	147.863669068263	1.66767545821905	0.611800602089899	2.72584801734797	0.00641365231100644	0.17198644142788
POFUT1	5100.22624063589	-0.424558503283163	0.155775544555887	-2.7254502912737	0.00642138448872787	0.17198644142788
CNDP2	6542.72813030135	0.568408269193477	0.20857909559306	2.725144950779	0.00642732629183518	0.17198644142788
RP11.473L15.3	1.98536452192304	2.12130983402572	0.778515116389347	2.72481521471809	0.00643374837772439	NA
RBM23	3930.57434614138	0.423734214996031	0.155521638980441	2.72459972627552	0.006437948444975	0.17198644142788
RP5.1171I10.5	210.01406364891	1.99390030091149	0.731835017471974	2.72452158383887	0.00643947212204691	0.17198644142788
INTS4	1300.4554905323	-0.716176739286464	0.262867468136292	-2.7244784010897	0.00644031426932458	0.17198644142788
TM4SF19	129.993733167376	2.13384067507533	0.783275718791147	2.7242522956904	0.00644472538058612	0.17198644142788
ARHGAP11B	473.425112760717	-0.97916685816198	0.359460864094121	-2.72398738213014	0.00644989706170041	0.17198644142788
RND2	277.808927238535	1.48336008250604	0.544595383087234	2.72378380091488	0.00645387394060965	0.17198644142788
MIR320E	2.98598236874101	1.95380792836622	0.717406452377957	2.72343233307982	0.00646074491843317	NA
RP11.211G23.2	28.9012223559633	-2.56667337481927	0.942586125780253	-2.72301204592274	0.00646896991050622	0.17198644142788
SCN3B	94.1236627247882	1.57267345835486	0.57758563141257	2.7228403423206	0.00647233284808979	0.17198644142788
PCSK1	200.958181942256	1.67682383890304	0.615849522729853	2.72278174621333	0.00647348085454672	0.17198644142788
NDUFS3	3891.53967183609	0.611068941200192	0.224443131619754	2.72260031657128	0.00647703655956649	0.17198644142788
PPP1R15B	2319.90055747916	-0.447814049308686	0.164550171796557	-2.72144382725012	0.00649974305832469	0.172401979556801
RNASE3	6.64619497640158	-1.76434135537517	0.648746157233005	-2.71961742771678	0.00653574842239232	0.173168978536466
DNASE1L3	133.447522319112	1.84639062187721	0.679106860422934	2.71885137594887	0.00655090357662139	0.173382473968888
CRB2	12.9119839498921	1.27372483261496	0.468573708242393	2.71830196660556	0.00656179224825187	0.173410310870142
RP11.302B13.1	25.0871440406686	1.16443971841047	0.428404895350053	2.71808219525361	0.00656615242354911	0.173410310870142
RP11.732A19.1	2.69453994426262	1.79704525044441	0.661169772757893	2.71797853514766	0.00656820990255965	NA
CCL28	139.230659444297	1.53123595825826	0.563683624089127	2.7164811834522	0.00659799456208314	0.174063076843552
SLC26A4	52.3352803060574	-1.22579977890724	0.451335309673765	-2.7159403499657	0.0066087824034828	0.174159595830293
RP3.402G11.26	42.5309205607038	-0.909562300496925	0.334964262656822	-2.71540102004491	0.00661955604522362	0.174208513803857
RP4.758J18.13	134.061014754703	0.776311885228458	0.285941373025664	2.7149337537761	0.0066289029102876	0.174208513803857
NMRAL1	2145.88738673156	0.85619091374511	0.315429914802487	2.71436180769738	0.00664035986754724	0.174208513803857
FXYD7	9.92235501173388	1.48448004422889	0.547080528599959	2.7134580132615	0.00665850055431906	0.174208513803857
RP11.29G8.3	23.6660412778998	-0.968411541644611	0.356984052025404	-2.7127585564402	0.00667257040922259	0.174208513803857
PLEKHB1	69.2895479666638	1.08361787115767	0.399497300567756	2.71245355004317	0.00667871409973489	0.174208513803857
LMO1	5.45758799838638	2.51125244413418	0.925869086681914	2.71231913912785	0.00668142312923028	0.174208513803857
ANXA8L1	15.5061054134275	2.28213616795962	0.84141497925701	2.71225997185694	0.00668261594876872	0.174208513803857
RP11.23P13.6	24.0986916022655	1.87094648816629	0.68990178440659	2.71190266564618	0.006689823356068	0.174208513803857
RP11.61K9.3	146.598282446724	0.900249897715268	0.331967480080483	2.71186170855353	0.00669064996890065	0.174208513803857
FAM83F	14.4312305298598	1.71096245438268	0.630974838251086	2.7116175648542	0.00669557928234766	0.174208513803857
CTD.2378E12.1	7.77367423667005	1.10540220272387	0.407679078874065	2.71145187478539	0.0066989264595822	0.174208513803857
GHDC	1856.39515839037	0.565827441776632	0.208704350980987	2.71114348654945	0.00670516035005242	0.174208513803857
TOPORS	1016.60198912392	-0.557246595508178	0.205567823592247	-2.71076759859803	0.00671276575981732	0.174208513803857
CXCR2P1	389.369767290057	2.5114535063822	0.926554906171809	2.71052852848044	0.0067176069427006	0.174208513803857
TRIQK	1202.45691679981	-0.466113137064799	0.172032245517946	-2.70945214754041	0.00673944261221946	0.174353995904584
BIN1	7656.67493503008	0.795899127087876	0.29379722474565	2.70900832292379	0.00674846468352447	0.174353995904584
NDRG4	489.527407841858	1.54015389212116	0.568547129680276	2.70892914891201	0.00675007527414023	0.174353995904584
RP11.542A14.1	10.0381994788852	1.93295422600604	0.713624576499977	2.70864301715386	0.00675589876592432	0.174353995904584
SLC22A16	34.997434566273	1.61440645321128	0.596052844950293	2.70849550822278	0.00675890270259285	0.174353995904584
BTBD3	1535.95488515827	-0.709527834484343	0.262117772950423	-2.70690471118318	0.00679137475603491	0.175006850121494
TIAM1	1308.10959951373	0.98102409821591	0.362513254824298	2.70617442303286	0.00680632862046101	0.175138966338863
RP1.47M23.3	25.7231819490919	1.91301462777836	0.707081865162171	2.70550656441968	0.00682003003214737	0.175138966338863
LMX1B	158.028694889235	2.25382109349485	0.833078490031458	2.70541265974799	0.00682195851369433	0.175138966338863
FOSL1	3543.29288443603	-1.75386980045997	0.648319369987897	-2.70525589956184	0.00682517892482695	0.175138966338863
AC007292.6	32.9565376073822	0.707087606696176	0.261478855972023	2.70418655484645	0.00684718353124635	0.175437596230774
MYH2	120.214742659064	-2.51247917337156	0.929173803534857	-2.70399269094041	0.00685117961456295	0.175437596230774
LAMB3	1655.84912154986	1.22545636135963	0.453557683939941	2.70187542787148	0.00689495900150356	0.176373773243697
ANKRD55	21.8959763533284	1.82995199456936	0.677673602711232	2.70034421770023	0.00692677679853758	0.177002333066396
RP11.329B9.3	12.6269032598567	1.29691182494704	0.480341375608725	2.69997941214931	0.00693437670730757	0.177011377829485
JDP2	4410.41150762161	0.743859500475097	0.27563810955135	2.69868162165914	0.00696147403037692	0.177517587774612
SNX25	644.719349669742	-0.601579718379572	0.222989793334176	-2.69779037589418	0.00698013791443403	0.177807913567997
AC012363.13	2.84381744520539	2.60751478305525	0.966693509507608	2.69735418455783	0.00698928871698114	NA
CTC.340A15.2	5.01449704813643	-2.41125489803924	0.894040837618233	-2.69702993038097	0.00699609818420114	0.178028835981093
SELPLG	2845.87724987483	1.05927522481337	0.392846089278395	2.69641280318996	0.0070090745648108	0.17817344697582
AC114498.1	6.02123781348543	1.38277750367051	0.512935884500944	2.69580964298466	0.00702177814324997	0.178310829793611
COA1	1977.56091170888	-0.358625092239498	0.133099803773192	-2.69440737005601	0.00705139234245447	0.17887690917323
INTS6P1	2.36866347201891	-1.29257692669685	0.479745572926012	-2.69429672651965	0.00705373375832706	NA
KHDRBS2	8.79823450736126	1.49091483117487	0.553461562735488	2.69380013276083	0.00706425117428964	0.179017211552616
CYBA	7910.95286326686	1.09000751838784	0.40477695296394	2.69285963641549	0.00708420864823659	0.179230814061417
AC016831.7	17.907532490632	-1.38007639548812	0.512522906778077	-2.69271163734677	0.00708735381650207	0.179230814061417
TRIM47	3384.68691498823	0.694702301938218	0.258110258917279	2.69149434374424	0.00711327045284062	0.179700190167987
AGPAT5	1315.0934746975	-0.685616464232162	0.254894571989693	-2.68980409775021	0.00714939751148399	0.180376511032667
SMG1P1	9.88928622763231	-0.964343137693568	0.358551646072678	-2.6895515562578	0.00715480941465694	0.180376511032667
BRD1	1714.07028250542	-0.607982036365129	0.226123301581565	-2.68871908429049	0.00717267513818308	0.180640495825438
PICK1	856.921264554863	0.732237502026135	0.272535998448321	2.68675516700589	0.00721498163196341	0.181518832427636
RASA2	706.82066511932	-0.447614442484509	0.166662115770044	-2.68575999060348	0.00723650499556616	0.181873025243504
TPSAB1	554.180650421551	1.96228796621503	0.730814211702439	2.68507089051246	0.00725144238244216	0.182061136650236
STARD13	1403.10982898716	-0.63845149022606	0.237814981934445	-2.68465630311741	0.00726044257724559	0.182099950430731
DCXR	2330.63575568282	0.741214183439907	0.276226608168952	2.68335548249048	0.00728874693746796	0.182374627004966
DYM	2757.32946820925	0.521328445905664	0.194361400319421	2.68226327372047	0.00731258856705754	0.182374627004966
MXD4	6199.23706885298	0.637109255997392	0.237551076248537	2.68198850562486	0.00731859743564618	0.182374627004966
PRKCA	2344.64845237025	-0.776422633271345	0.289577833572234	-2.68122260496735	0.00733537021159841	0.182374627004966
FGD3	952.930818867733	1.30181278393729	0.485534977056575	2.68119259261027	0.00733602816626421	0.182374627004966
RP11.572P18.1	212.986774185155	0.972371990410834	0.362675948071845	2.68110415256489	0.00733796732690593	0.182374627004966
GTSF1	42.9643463462108	1.4481782331405	0.540178687284923	2.68092441858345	0.00734190964040241	0.182374627004966
TRIM50	21.5588524916773	1.33385542584581	0.497594647765716	2.68060645715352	0.00734888851096298	0.182374627004966
ASPSCR1	2413.90054143435	0.564328482570713	0.210551909824055	2.68023445164799	0.00735706113821961	0.182374627004966
STAC	487.558939672389	-1.56550017148462	0.584124315874172	-2.68008047078432	0.00736044634495266	0.182374627004966
HAPLN1	648.844873793813	2.3616941215398	0.881373950424984	2.67955970380226	0.00737190555247725	0.182374627004966
MADD	2898.55968314064	0.42379548623695	0.158168900782449	2.67938567025798	0.00737573863677492	0.182374627004966
FMN1	643.114740893702	-1.11209913161231	0.415124434192857	-2.67895368234493	0.00738526088736109	0.182374627004966
LGALS2	191.970763820168	1.73065302845451	0.646040243921165	2.67886257046503	0.00738727066175811	0.182374627004966
TNKS2.AS1	27.8309531991371	1.18719272742358	0.443258455369758	2.67833069632761	0.00739901270259484	0.182374627004966
RP11.324I22.3	18.404045640537	-0.804782272933904	0.300494353848392	-2.67819432420996	0.00740202604809571	0.182374627004966
NGB	3.42271242038791	2.25568293380569	0.842346238083228	2.67785719437476	0.00740948016002301	0.182374627004966
RP11.94I2.4	4.22872727974851	1.44470241963991	0.539504756928352	2.67783073473765	0.00741006548090966	0.182374627004966
HCST	834.067443042078	1.31388806596409	0.490680167347128	2.67768732750632	0.00741323855319218	0.182374627004966
AC005682.7	6.2517863576517	-1.25592660842507	0.469275212897788	-2.67631141365785	0.00744374444152654	0.182940878231441
NPIPP1	350.468541916323	0.910246475412874	0.340349117880997	2.67444934507261	0.00748520832377973	0.183540665540283
AGPS	2225.59180300569	-0.485902060526176	0.18173077955009	-2.67374663625569	0.00750090974681445	0.183540665540283
IFNG.AS1	7.67931730678865	2.3459577153825	0.877494964621479	2.67347142714884	0.00750706710141178	0.183540665540283
L3MBTL4	194.756534351176	1.19277574127578	0.44620691837397	2.67314488449081	0.00751437883953845	0.183540665540283
PMF1	1519.84814610312	0.513148239793388	0.191971567274362	2.67304292546619	0.00751666314986148	0.183540665540283
OACYLP	36.8528748405344	1.68672222898208	0.631048921031454	2.67288663805197	0.00752016585302314	0.183540665540283
PPL	620.194675838341	1.7195533377877	0.643338122741318	2.67286093735676	0.00752074199540806	0.183540665540283
TDRD9	54.9240163944451	1.71502028548703	0.641848569297647	2.67200141516826	0.00754003304584779	0.183767648341121
XRN1	1521.44325748951	-0.448333849897274	0.167812410906552	-2.67163702300262	0.0075482248190069	0.183767648341121
CT55	5.18816023956786	-1.7637351748317	0.660270374258398	-2.6712317311112	0.0075573454172701	0.183767648341121
RNF169	558.936647818699	-0.86097871525039	0.322330183181174	-2.67110795133466	0.00756013289871983	0.183767648341121
MPLKIP	1714.64758184325	-0.543058900366787	0.203343987883319	-2.67064153712969	0.00757064468199316	0.183840237511343
C2orf69	915.764000470158	-0.523114981127366	0.195905539114136	-2.67024089003729	0.00757968470321319	0.183876978763451
CORO7	1306.82963398319	0.893678334216228	0.334868861353825	2.66874122187181	0.0076136085126839	0.184381810506802
ANGPT1	322.378113027951	-1.17364013455281	0.439787329623976	-2.66865381400663	0.007615589946431	0.184381810506802
GNG7	187.668987196057	0.78001738854959	0.292348847586351	2.66810488561682	0.00762804407951498	0.184439354131358
GCK	68.5567510655985	1.78286588154748	0.668277343961873	2.66785324634497	0.0076337593928146	0.184439354131358
RP1.197B17.3	59.2162797553395	0.827547255193313	0.310227277916101	2.66755154721474	0.00764061674161587	0.184439354131358
HNRNPA3	10422.8910969473	-0.395804019450284	0.148445191433357	-2.66633102513109	0.00766841449206764	0.184818270814492
RABGGTA	1229.18539996967	0.577069262776236	0.216462754706919	2.66590556679168	0.00767812571619307	0.184818270814492
ACE2	6.17338824589772	1.44304594759078	0.541304588116705	2.6658668322236	0.00767901039243152	0.184818270814492
ADAMTS20	4.58832782077325	-1.91323827635479	0.718017113224371	-2.66461375518348	0.00770767931138454	0.185292009255132
HNF1B	6.42014683808825	1.73240326645777	0.650221819842503	2.66432656301414	0.00771426342437906	0.185292009255132
GRM6	13.2572497935691	1.77079759437178	0.664710466190903	2.66401340800193	0.00772144850062319	0.185292009255132
LRCOL1	5.81848134797383	1.60925141993956	0.604241601399407	2.6632582334824	0.00773880001477615	0.185526148735002
CTC.281F24.3	2.99720483191118	1.65580169845316	0.622012429301762	2.66200741408315	0.00776761675286986	NA
RP11.690D19.3	97.3463059015938	-0.888715952667506	0.334040112756339	-2.66050668386574	0.00780231786575332	0.186865512884792
IFI27L2	2682.26983535279	0.931241197493078	0.350124393666748	2.659743834871	0.00782001027512822	0.187105809021653
LHFPL4	5.58928049557147	1.93174368399024	0.726490426447174	2.65900776344325	0.00783711570802737	0.187331604336009
CTD.2201I18.1	52.5933306766774	-1.51978872958173	0.571638044813173	-2.65865567096472	0.00784530976795512	0.187344156716887
GPRC5C	707.991643202743	1.19642289587977	0.450096202541594	2.65814927814061	0.00785710823432251	0.187442672906508
NINJ1	6161.14894418809	0.731771751675566	0.2754573756266	2.65656982322931	0.00789401018672411	0.187965860176855
LINC00528	42.2008296753669	1.23249298907659	0.463944613869077	2.65655199399383	0.00789442762869757	0.187965860176855
MATN1	35.67003711049	1.42586104407292	0.537066225916981	2.6549073005632	0.00793302054064576	0.188700836209771
ANKRD39	419.94078692857	0.494706078362953	0.186381932646761	2.65425983805276	0.00794825961305282	0.188879410590727
MURC	136.274578765201	-1.21734729327732	0.458773981451635	-2.65347936564631	0.0079666641324628	0.189132787261354
FLJ22447	94.9389046288084	1.48047391873381	0.558222808590941	2.65212007812938	0.00799880897074737	0.189711557617852
RP11.305L7.3	24.7981710542751	1.6990096850126	0.640906522054229	2.65094772255858	0.0080266264143752	0.189906894494692
RHCG	14.9976418528662	1.78268984019334	0.672534664289952	2.65070327947402	0.00803243741768565	0.189906894494692
MYEOV	269.9326080738	-1.98865302448183	0.75032664798468	-2.65038304293629	0.00804005591426955	0.189906894494692
SLC35E3	729.32627678719	-0.47009106217433	0.17742279985981	-2.64955272121605	0.00805983959065656	0.189906894494692
AC006077.3	22.9237278298004	1.02894333693432	0.388350706805702	2.64952095851114	0.00806059725009402	0.189906894494692
RRP7B	245.434660328863	-0.820151233715729	0.309548189957336	-2.64951067498979	0.0080608425642454	0.189906894494692
PTCHD1	52.5093185310072	-2.10826737141032	0.795727318639462	-2.64948471923151	0.00806146177047751	0.189906894494692
HMHA1	3113.72898437736	0.960312083324947	0.362532492614828	2.64889934802404	0.00807543782824896	0.189959621761774
ROR1.AS1	315.220049892898	1.84596277123048	0.696921156103731	2.6487397535048	0.00807925199600814	0.189959621761774
AK4P3	2.59376480946124	-1.51459322603257	0.571853468250211	-2.64856875077983	0.00808334059952318	NA
C10orf2	662.718143656257	-0.572517034356847	0.21619455577474	-2.64815657501279	0.00809320316347213	0.190104673154289
ZBTB8B	25.0728995025428	2.08772140222402	0.788879337377959	2.64643945316541	0.00813440656529421	0.190700874504623
LYPD5	157.898493476892	1.25478717722687	0.474144428164996	2.64642396428251	0.00813477908355768	0.190700874504623
SLITRK1	7.712215258156	-2.35050256325253	0.888473514542545	-2.64555163972755	0.0081557837508316	0.190700874504623
HSH2D	173.048639986755	1.7957350242062	0.678840453326398	2.64529760329822	0.0081619098036399	0.190700874504623
EEFSEC	1636.84987508711	0.494384233433865	0.186913061653374	2.6449956416138	0.00816919692417411	0.190700874504623
RP11.545A16.3	3.40675620104871	1.85717290866372	0.702275731695476	2.64450674406763	0.00818100763977929	0.190700874504623
RP3.439F8.1	64.3014592588805	-1.91139999711509	0.722827235730067	-2.64433865055534	0.00818507194738879	0.190700874504623
TRADD	1275.39007069935	0.655698839722486	0.247965796515273	2.64431163062482	0.00818572542675797	0.190700874504623
PDE1B	363.453748021956	1.00651573120498	0.380677302224744	2.64401298770042	0.0081929512425353	0.190700874504623
ERAL1	2621.93189602064	0.424814808406537	0.160679749555529	2.64386028470705	0.00819664817347635	0.190700874504623
TFCP2L1	92.2563719604855	1.17670988626546	0.445177944669322	2.64323491393878	0.00821180394613664	0.190871058242413
CH17.340M24.3	314.746667546453	1.06481738234927	0.402895197753963	2.6429140587561	0.00821958955630679	0.190871058242413
KCNK12	10.4006297696041	1.7127983323386	0.648152473747537	2.64258550528306	0.00822756881150217	0.190874908353454
FAM71E1	50.1274732015799	1.8638523563794	0.705657715221088	2.64129806303534	0.00825890249410024	0.191187888991725
CACNA2D2	175.388277904252	1.55839761096141	0.590046010633883	2.64114591553162	0.00826261249576113	0.191187888991725
RP11.116D17.3	19.0431668199157	1.66831490771482	0.631682171069559	2.64106695443064	0.00826453849012491	0.191187888991725
DUSP23	2211.20711300771	0.715354913357096	0.270971248328988	2.63996611363202	0.0082914317231584	0.191596485251773
FAM134C	4593.83994332626	0.592214489537978	0.224348964718602	2.63970235066957	0.00829788699481663	0.191596485251773
RP11.849F2.9	55.5448334553604	0.951669046974355	0.360612462289489	2.63903538145164	0.00831423030494586	0.191753526454479
RP11.422P24.10	21.1849417855226	0.838506514491763	0.317777850533058	2.63865625966444	0.00832353307808261	0.191753526454479
TNS3	8632.96690163241	-0.877748881110792	0.332701507346695	-2.63824738309985	0.0083335764006691	0.191753526454479
CR2	12.1410919910276	1.9272337291371	0.73052600319347	2.638145282594	0.00833608600821387	0.191753526454479
GPR137B	1706.64917224967	1.04810431735425	0.397353511914965	2.63771248001086	0.00834673170761385	0.191773123489374
GABRA2	5.21567506818404	2.77438509643958	1.05191381207114	2.63746427188461	0.00835284239980581	0.191773123489374
NEB	124.133337083223	-1.29474785450704	0.49117522301202	-2.6360202914294	0.00838847151046104	0.191773123489374
RP4.734G22.3	34.0287837667402	1.15545967410929	0.438467437077988	2.635223454242	0.00840819100767295	0.191773123489374
EIF4A1	246.589677580969	-0.595133877321925	0.22584270411069	-2.63516981726466	0.00840951986138449	0.191773123489374
RP11.807H22.7	11.0935586876869	2.51504528109332	0.954424466045249	2.635143346141	0.0084101757515124	0.191773123489374
WDR43	1861.30629536144	-0.434886192686272	0.165043624076504	-2.63497723780403	0.00841429255698099	0.191773123489374
RRNAD1	1556.63590068561	0.422655087755689	0.160405450913999	2.63491723845653	0.00841578001533617	0.191773123489374
RP11.144G6.12	5.55954245522866	-1.04547170621273	0.396791509669369	-2.63481370124043	0.00841834738462542	0.191773123489374
GRP	11.3124513869704	4.12089778681188	1.56419111362535	2.63452320558248	0.00842555442492691	0.191773123489374
GHET1	12.4739399483296	1.04863239185671	0.398052523117968	2.63440709693965	0.00842843656086082	0.191773123489374
AP2A2	6042.57388044104	0.536523619230256	0.203693736127802	2.63397210650419	0.00843924206134602	0.191773123489374
PLIN4	132.235753341902	1.53850911547585	0.584209590586605	2.63348828958976	0.0084512750013126	0.191773123489374
MKRN2OS	5.87208880191497	-0.993692462086761	0.377334903519916	-2.63344963006931	0.00845223715828961	0.191773123489374
TFPT	1480.15554337032	0.616194851763571	0.233996471572946	2.63335103995992	0.00845469130942959	0.191773123489374
SNORD69	2.53423775155625	-1.0576409558658	0.401836072154846	-2.63202093877286	0.00848786315940913	NA
RP11.425D10.10	12.7517191080934	0.656339185198123	0.249382952144756	2.63185265694163	0.00849206828071545	0.19244224121484
WDR86.AS1	52.8094180873466	1.59191876612949	0.605115651241027	2.63076779267673	0.00851922222585785	0.192755712141036
GAD2	3.36020744417558	2.89252731598254	1.09954029815631	2.63066967243735	0.00852168198093738	0.192755712141036
FGD6	579.776464260823	-0.979442678328722	0.372427024576001	-2.6298915322909	0.0085412115058363	0.193018738090726
IGHV4.28	59.870585430064	3.18866889547423	1.21307965369382	2.6285733882064	0.00857438520738694	0.193589331082491
DCTPP1	1461.94348762937	0.505216476373182	0.192230279345524	2.62818364564243	0.0085842158892711	0.19359882888614
GAS2L2	3.50194565868487	2.32886414601293	0.886246310379348	2.6277843063923	0.00859429908353892	0.19359882888614
RP5.1021I20.2	5.23230643502476	2.40091790929573	0.913725198496781	2.62761485974734	0.00859858075817521	0.19359882888614
SEZ6L	17.8081499579122	1.8250348207422	0.694784276561003	2.62676471289137	0.00862009155193994	0.193904435103444
APOBEC2	4.21850842178188	-1.59344140072121	0.60678312081206	-2.62604767019342	0.00863827186705888	0.19391924364552
PTPLAD2	607.951947024356	-0.866937350415535	0.330139782591864	-2.62597056195221	0.00864022895353359	0.19391924364552
CTA.384D8.31	65.083741272436	2.12685766056735	0.809984694343874	2.62579981500787	0.00864456409717842	0.19391924364552
ST13P5	10.2666157913204	-0.78735005053022	0.300009757043496	-2.62441481333578	0.00867980021174538	0.194139793466494
MORN3	88.2673838065654	1.07277517083287	0.40884580939213	2.62391137731818	0.0086926400071369	0.194139793466494
COLEC10	5.0819893106374	1.79877118357571	0.685538365313682	2.62388113428581	0.00869341187545938	0.194139793466494
SLC19A3	118.803969101353	1.70879914829221	0.651299381287483	2.62367691017036	0.00869862572508626	0.194139793466494
SEC11C	1014.85903406972	0.845450633168788	0.322321743480457	2.62300217180368	0.00871587169686432	0.194139793466494
MOGS	3589.44522737744	0.45227021617781	0.172430089147008	2.62291934322565	0.00871799085780671	0.194139793466494
KIAA1377	413.548564227899	-1.17756673748931	0.448963298274422	-2.62285746299365	0.0087195743578835	0.194139793466494
TMUB1	2433.06729598245	0.587202557043824	0.223881305223938	2.6228297912435	0.00872028255440175	0.194139793466494
PPP2R2C	21.9557344606681	1.36804109951684	0.521633528863219	2.62260959815634	0.00872591973581443	0.194139793466494
TIMP4	365.615035622032	1.60148956751165	0.610785302016634	2.62201720019129	0.00874110193444544	0.194300617976859
B3GAT3	3499.06002794946	0.630447961537155	0.240568075024717	2.62066345034511	0.00877588498551641	0.194650270082299
C2CD4D	8.96324040976113	1.48201237102502	0.565539361748934	2.62052912893965	0.00877934295537689	0.194650270082299
RP11.468E2.11	97.9432617434499	0.636084317150991	0.242736263022657	2.62047503422107	0.0087807359134919	0.194650270082299
NPTX2	2098.40204157303	2.22922235779978	0.850936656563491	2.6197277324995	0.00879999941455701	0.194747555332058
KRTCAP3	28.0545010756139	0.900633205400359	0.34384400480128	2.61930757210924	0.00881084663476424	0.194747555332058
CTD.2524L6.3	10.2245481130588	-0.806139668003947	0.307787657272152	-2.6191422851344	0.00881511709773453	0.194747555332058
ARSJ	620.62897195749	-0.933932386461234	0.356589461410596	-2.61906895051465	0.00881701241136582	0.194747555332058
SNAPC1	650.842063388363	-0.541230372118728	0.206687985616651	-2.61858651582468	0.00882948988501157	0.194846981392003
RNASEH1.AS1	232.416169402801	-0.632794263507026	0.241741872466397	-2.61764441985525	0.00885390132099009	0.195209346002226
PRKCG	6.01193138339607	1.14248875637852	0.436517135612355	2.61728272081647	0.0088632896130713	0.195240128005157
BLVRB	5085.36659514456	0.946117175818711	0.361681892411188	2.61588206562216	0.00889972909361133	0.195825536697442
ACYP2	409.719448838477	0.459289408943955	0.175604038469397	2.61548317992697	0.00891013096563453	0.195825536697442
NRL	80.2246668145964	0.730913162200078	0.279471754313566	2.61533822620227	0.00891391366030354	0.195825536697442
PPP2R2B	154.093118353289	1.59496494809464	0.610030686251479	2.6145651096593	0.00893411305188591	0.195977713031544
TCIRG1	8077.22230174801	1.13418260750231	0.433813910408018	2.61444499655524	0.00893725494068423	0.195977713031544
AC112497.1	182.405483603552	0.960892681115238	0.367573294605671	2.61415259273956	0.008944907692913	0.195977713031544
NAGPA	1108.84260635879	0.673375647982209	0.257627509014195	2.6137567783769	0.00895527621461198	0.196029070472004
STAU2	1090.74983959341	-0.439144620014462	0.168060825359351	-2.61301001631686	0.00897486718957382	0.19628203274315
ABCG5	11.6907390685975	1.4327282775155	0.548513524150946	2.61201996748074	0.00900089969237798	0.196509259401749
WIF1	39.7906436120679	3.25621687417417	1.24663593991464	2.61200304749528	0.00900134517461041	0.196509259401749
ENTHD1	17.0615218760238	1.8547622306155	0.710413589861531	2.61082031240001	0.00903253395471578	0.197014082124778
ZNF623	1452.44285417127	-0.527074508546219	0.201965569974368	-2.60972456153349	0.0090615150279756	0.197469893504385
SLC46A1	275.582414503407	0.598322081784548	0.229349702606273	2.60877635761183	0.00908666066669905	0.197732300694098
COL9A1	31.0611484254766	2.34113721574277	0.897465176812414	2.60861064722081	0.00909106156813407	0.197732300694098
IGHV1.69.2	207.331013624261	3.07297543008695	1.17812748945748	2.60835559613504	0.00909783887920773	0.197732300694098
MAB21L3	8.91968047263384	1.60606466005867	0.615857273586697	2.60785206076255	0.00911123225018775	0.19784737123541
TEX15	18.3089981472284	2.48900456758706	0.954577654915575	2.60744063593988	0.00912218866663645	0.197888056914071
CCDC101	1051.45709315163	0.695090136365724	0.266606774380025	2.60717357232241	0.00912930697704194	0.197888056914071
MRPL23.AS1	3.10925417676252	2.19271726602931	0.841449570849763	2.60588078239191	0.009163835128877	0.198460397485227
TSPAN1	73.3810812664777	1.14543666124858	0.439683444044078	2.60513939463628	0.0091836888439039	0.198562256288809
CCDC153	55.7448841212794	0.827185195631159	0.31752554058247	2.60509814144011	0.00918479469509002	0.198562256288809
UGCG	3280.50843103068	-0.645428421051198	0.2477950532057	-2.60468646448488	0.00919583680001013	0.198625196452208
ZGRF1	331.134754436664	-0.684944576140483	0.263086825983785	-2.60349249180078	0.00922792888421423	0.198832045400722
CTD.2134A5.4	9.30166784708027	1.50336088075663	0.577447518686647	2.60345889817986	0.00922883327113172	0.198832045400722
RNU6.403P	12.190480209596	1.59852128809093	0.614018995742856	2.60337432420473	0.00923111047022526	0.198832045400722
RAMP1	164.068185666071	1.32788008629501	0.510172360018231	2.60280679699613	0.00924640441806958	0.198832045400722
RNF212B	4.70804272494357	1.46887786255634	0.564499271151787	2.6020899186624	0.00926575545839488	0.198832045400722
ATP2B3	16.5584150733817	1.95919483113998	0.753003704310101	2.60183956589561	0.0092725218597826	0.198832045400722
HNRNPA3P3	4.53885103242498	-0.741375835925261	0.284951499025305	-2.60176148734499	0.00927463302712596	0.198832045400722
RYR2	98.3073740693818	1.80738072386384	0.69472129059886	2.60159109605789	0.00927924172966252	0.198832045400722
RASA4	39.7001250866643	0.922503711570878	0.354641571977488	2.60122835128149	0.00928905996981169	0.198832045400722
SETD9	252.694654886839	-0.781647472700949	0.300495511646041	-2.60119516733969	0.00928995860638539	0.198832045400722
PLEKHG3	1277.41000718414	1.04247597598569	0.40088380995992	2.60044419376756	0.00931031607267285	0.198832045400722
KCTD3	2073.59322927179	-0.496871262205629	0.191081554826981	-2.60030991822069	0.0093139602193985	0.198832045400722
SCD	6711.43761308621	-1.01973302218937	0.392208201844749	-2.59997883112352	0.00932295113565944	0.198832045400722
TIMP1	89044.0693098274	1.16810739107868	0.449338361942834	2.59961643610409	0.00933280111779739	0.198832045400722
ITIH5	1033.72057233887	1.28278019993333	0.493474736393055	2.59948505025715	0.00933637450881138	0.198832045400722
SPIDR	2246.45502097877	-0.460702639099813	0.177234254921874	-2.59939953088016	0.0093387010937942	0.198832045400722
LINC01213	3.12624045918803	-1.9169454514583	0.737518718720787	-2.59918209911093	0.00934461873180638	0.198832045400722
FLAD1	1956.64540748647	0.398964557987223	0.153527857003835	2.59864604230917	0.0093592223843505	0.198832045400722
TBC1D31	502.106945497989	-0.529285065025273	0.203694304766212	-2.59842839313919	0.00936515755201129	0.198832045400722
GCNT3	35.0607204245411	1.43033222024499	0.550484113590048	2.59831698124203	0.0093681969894892	0.198832045400722
AC108004.2	4.11249753710011	2.17966138391068	0.839640408615655	2.59594626645514	0.00943308159831479	0.199166629693916
DHRS1	789.733177366545	0.579884315471455	0.223385280331358	2.59589313410125	0.00943454037054934	0.199166629693916
RP11.848G14.2	4.6692460773005	1.39905080208008	0.539015400848707	2.59556739914518	0.00944348796658364	0.199166629693916
FAM229B	903.312747085265	0.810304274069546	0.312202551187032	2.59544411468988	0.00944687643462485	0.199166629693916
CFH	5187.32608230378	-0.888391575787719	0.342290129841275	-2.59543439420727	0.00944714364779557	0.199166629693916
STK33	126.256821478203	2.07238919808313	0.798535010819495	2.59523899391255	0.00945251657372876	0.199166629693916
TTC34	18.7304421228641	1.30763139296935	0.503928319244841	2.59487578497055	0.009462510979545	0.199166629693916
AGBL4	20.999752351291	2.01910306703322	0.778209234250513	2.59455038332693	0.00947147304682846	0.199166629693916
MTDH	5776.01050882567	-0.477973776646986	0.184224056476423	-2.59452422115217	0.00947219392249471	0.199166629693916
TRAPPC5	91.5215976026301	0.65411863910768	0.252117127125748	2.59450298583415	0.00947277907894454	0.199166629693916
FBXO9	1949.22979184838	-0.357932999442213	0.137959881388276	-2.59447163798903	0.00947364295322488	0.199166629693916
TJP3	12.9684649958382	0.907674213371	0.349931967337348	2.59385908717499	0.00949053754695963	0.19935025084667
RP11.286B14.1	1.97031536837731	2.53112544892623	0.975922246705243	2.59357285631251	0.00949844120813896	NA
RP11.729I10.3	8.85470265567088	-2.32388174932486	0.896352562857259	-2.59259787456527	0.009525407341747	0.199910804082077
LRRC3	538.95035261388	1.55840297169121	0.601339393580007	2.59155310350355	0.00955437947071337	0.200320340901366
IGLV1.51	456.714594701489	2.24709910652788	0.867169504790258	2.59130319287621	0.00956132127762055	0.200320340901366
RP11.455F5.6	10.0894863707546	1.14316032235496	0.441259369972544	2.59067659554989	0.00957874614832349	0.200358603200795
REM2	24.9288747230596	0.887224610689633	0.342472122665665	2.59064768187213	0.00957955088372542	0.200358603200795
GCLM	1065.4205385831	-0.762739358018275	0.294456809804862	-2.5903267733008	0.00958848656945183	0.200373942177193
DHX29	2062.59605067671	-0.541630268538968	0.209165927221157	-2.58947657362132	0.00961219628064227	0.200561936254066
L1TD1	8.6704514967067	-1.91191154932543	0.73837042273879	-2.58936638094698	0.00961527307196358	0.200561936254066
PHF20L1	2068.61311766903	-0.529454231203491	0.204521221309485	-2.58874960658636	0.00963251081501578	0.200561936254066
ZNF204P	54.2407769571085	1.40068782183728	0.541090049257973	2.58864088104766	0.00963555235460381	0.200561936254066
AC073635.5	4.575537932051	-1.08802796216759	0.420335424072007	-2.58847553610233	0.00964017943332704	0.200561936254066
SUSD3	159.981183499045	1.14837786288838	0.44369044699189	2.5882411277369	0.00964674260504022	0.200561936254066
ZNF688	830.036636830587	0.667504154957346	0.25809647005969	2.58625836611781	0.00970241725147443	0.201378342122999
ATOH8	800.480026382462	1.36726790239123	0.528719273471077	2.58599973746941	0.00970970045033618	0.201378342122999
FERMT3	4079.89318035221	1.00746607485062	0.389592770758917	2.58594653306348	0.00971119933508536	0.201378342122999
LINC00689	24.3761131029741	-2.47909460961892	0.958787543690727	-2.58565583786787	0.00971939249838422	0.201378342122999
RORB	41.8302607193183	2.06807330196873	0.79991137154226	2.58537805004748	0.00972722762721107	0.201378342122999
S100A14	57.0723727711216	1.51603935141568	0.586469014970622	2.58502889788922	0.00973708360335242	0.201411698007025
RP11.249L21.4	4.88089478699471	2.44943307586026	0.947739065755468	2.58450154094656	0.00975198687441475	0.201549312483146
ZC3H15	2485.77780163994	-0.435308052284693	0.168489583964714	-2.58359028517666	0.00977778716664288	0.201674771974779
SELL	504.413148121151	1.28841376641148	0.498733581805397	2.58337078836254	0.00978401084143569	0.201674771974779
RP11.848P1.3	156.095298880175	1.04985686494366	0.40645540565606	2.58295707311133	0.0097957510394329	0.201674771974779
RP4.563E14.1	34.0886270880095	0.941246786519482	0.364414366809188	2.58290252044956	0.00979730004318954	0.201674771974779
LOC440461	2.26488443229595	1.36862359867684	0.529887617885754	2.58285635006463	0.00979861120566976	NA
AC107983.4	48.3838365553395	0.906893093642734	0.351123685898923	2.58283086577018	0.00979933498440637	0.201674771974779
LRRC37A	26.1012382027736	0.975836654145284	0.377905658387956	2.58222292385867	0.0098166152561743	0.201808052240259
S100A13	7193.53288823686	1.03966776795018	0.402656436780037	2.58202197452546	0.00982233305144163	0.201808052240259
PCED1B	606.834151674241	1.1962365267885	0.463580614999651	2.58042827521897	0.00986778523555184	0.202434908557265
ZDHHC12	1332.99208538093	0.839525356151252	0.325350614863311	2.58037119894168	0.00986941651691442	0.202434908557265
RP11.192H23.4	41.5360961817101	0.662709322148313	0.256916887332531	2.57946968386925	0.00989521435926689	0.202793784884674
C9orf16	2906.63299300084	0.816661334700896	0.316639320949367	2.57915325314725	0.00990428360567907	0.202809508971613
GMIP	1409.21655844768	0.793660238839156	0.307798746909412	2.57850380096816	0.00992292080723393	0.202953796076287
NUP107	2153.32613977572	-0.451074694794053	0.174948470607556	-2.57832888294236	0.00992794573298798	0.202953796076287
CPA4	170.343866310638	-1.64239887966948	0.637347451179781	-2.57692860719732	0.00996825367781848	0.203538830254046
PROX1	139.979361369642	-1.47977354111556	0.574277676370203	-2.57675616170328	0.00997322771354102	0.203538830254046
RP11.680G10.1	3.34621474164532	-1.2491601927655	0.484909057472573	-2.57607106634866	0.00999301052069111	0.203703032729353
DEAF1	2201.5023714797	0.57766116235229	0.224256036054298	2.57590017426521	0.00999795064237153	0.203703032729353
SOSTDC1	13.1076473406064	-1.9383590754963	0.752669660759649	-2.57531182210795	0.0100149752750298	0.203775271966716
ST13P4	4.72749618789259	-0.990090818112753	0.38447124833207	-2.57520119490861	0.0100181792800371	0.203775271966716
C1orf115	626.918169792602	1.37892794450751	0.535603037065239	2.57453346803848	0.0100375374989144	0.20399917101579
IMPAD1	5868.27900674324	-0.489535268178894	0.190218972319141	-2.57353544817587	0.0100665334256751	0.204337224342236
CD79A	154.395217693877	1.78294136285018	0.692928996243128	2.57305059034447	0.0100806471254058	0.204337224342236
SPATA5	491.199900081996	-0.508209088946081	0.197519677554111	-2.5729542253169	0.0100834543078893	0.204337224342236
PLEKHG6	21.0635604366909	1.22394747964055	0.475723829261675	2.57281095533962	0.0100876291521035	0.204337224342236
NPPC	87.0429571709454	2.44730143551613	0.9516288065281	2.57169751349248	0.010120127013185	0.204686930578227
SEC14L6	27.0271199600128	-1.85977521799578	0.723184944005549	-2.57164537703859	0.0101216509942486	0.204686930578227
KHK	182.787272122018	0.911923572081993	0.354698848914364	2.57097978996307	0.0101411244836252	0.204911108362681
IGHV3.11	175.66268475345	2.81397007573434	1.0946690840726	2.57061254097472	0.0101518835875949	0.204958978645748
RP11.159G9.5	74.8696415073454	-0.966472557368055	0.376086412469505	-2.56981514174331	0.010175279578335	0.205041063495672
NME2P1	22.6172872214118	0.812352549426612	0.316127920863024	2.56969567005946	0.0101787890539037	0.205041063495672
HMGN2P40	2.49081896389496	1.73006300878892	0.673280587257662	2.56960179980183	0.0101815472446274	NA
C12orf50	4.82269569092743	1.39891105112676	0.544521239281395	2.56906609000763	0.0101973007489912	0.205041063495672
BEX5	162.865391104941	1.76787301736946	0.688261253934197	2.56860749790004	0.0102108037049304	0.205041063495672
SSTR1	7.12160286183713	-1.47151109631841	0.573124417679615	-2.56752469607919	0.0102427493038002	0.205041063495672
RP11.475J5.4	7.01573003819804	1.49322939256524	0.581592574034023	2.56748359458572	0.0102439636603378	0.205041063495672
RP11.290L1.3	3.84518612594486	-1.72299802414219	0.671088575561833	-2.56746737597151	0.0102444428796519	0.205041063495672
OTOF	155.59497430279	1.82415799606245	0.710493836116439	2.5674508395925	0.0102449315086632	0.205041063495672
AP000648.5	94.6990975336515	-0.74688123994507	0.290907502100887	-2.56741828433854	0.0102458935357233	0.205041063495672
CCT6A	11915.1612084759	-0.588572956785428	0.229256133104094	-2.56731607925266	0.0102489142791451	0.205041063495672
CC2D1A	3014.96858556807	0.470615743976887	0.183325663777716	2.56710235915203	0.0102552334897011	0.205041063495672
SCN2A	73.1279119345646	-1.85496798857038	0.722667963830461	-2.56683301517647	0.0102632023094336	0.205041063495672
RP11.262A16.1	10.9780531123739	1.39935565094785	0.545181518408923	2.56677015580385	0.0102650628619758	0.205041063495672
RP11.46H11.11	5.84853061085224	-0.947233235482164	0.369289253778423	-2.56501705855355	0.0103170732631209	0.205911587209788
AC083843.1	92.1117589014343	-0.76044483739797	0.296529659407087	-2.56448153927835	0.010333007596526	0.206061259245333
LRP10	11649.5288714236	0.526171770901884	0.205240796827347	2.56368021872625	0.0103568917326098	0.206369093096186
CDK6	3698.50461632775	-1.01499869772178	0.396146037759726	-2.56218313696073	0.0104016453723887	0.207007847858191
HOXA.AS2	178.751475097695	-0.928493524017108	0.362415052906607	-2.56196180752011	0.0104082763566923	0.207007847858191
CYP26B1	1219.77339069849	1.4624113198295	0.570932773621923	2.56144223522526	0.0104238574163173	0.207007847858191
SCAMP3	5235.12789354243	0.427826556325457	0.167035407952906	2.56129261195973	0.0104283482020606	0.207007847858191
TIMM17B	2657.76869126523	0.605969657709219	0.236596574653078	2.56119370535162	0.0104313177253851	0.207007847858191
AC006378.2	15.2473129734077	-0.981072310594678	0.383095628824858	-2.56090708631709	0.0104399272837992	0.207010538649294
ENPP7P2	1.87009471693718	2.30642609316743	0.900677357995098	2.56076837359553	0.0104440962527669	NA
CCRN4L	292.63025532961	-0.693645011388325	0.270991832220311	-2.55965283420204	0.0104776773422358	0.207339162158802
FAR2P2	17.5594848403082	-1.64228950583214	0.641698523113716	-2.5592851575585	0.0104887665434819	0.207339162158802
AP000251.3	13.1860515257232	1.47504450078711	0.576353237076424	2.55927165130421	0.0104891740935572	0.207339162158802
FBXL3	1867.83534770332	-0.56387282933553	0.220329149163287	-2.55922936877335	0.0104904500564198	0.207339162158802
DEGS2	54.7212852173015	1.08987658501424	0.426154799878166	2.55746640733797	0.0105437741206101	0.208175283657235
SLC38A10	9673.89008695507	0.470887340075503	0.184146428372431	2.55713534189838	0.0105538146601265	0.208175283657235
DPY19L4	1429.28475760873	-0.480127967646745	0.187770991638145	-2.55698690973526	0.0105583190655088	0.208175283657235
RP11.775D22.2	5.56811055442418	1.74097839664556	0.680968086247454	2.55662259627966	0.0105693819752045	0.20822534860667
GRIN1	5.11894610877514	1.59128159625246	0.622589097317823	2.55590983380189	0.0105910558696978	0.208335088198926
DAND5	15.1144277382813	1.59065920118317	0.622353207433789	2.55587853036396	0.0105920086595057	0.208335088198926
TARID	99.5887163962922	1.83775682263418	0.719250185240884	2.55510093753913	0.0106157009078912	0.208633111406979
CNGA1	7.2479362469773	1.23955618137956	0.48524878759118	2.55447558670437	0.0106347887202148	0.208680559377246
MSNP1	9.014565361947	-1.26699317470479	0.495992154346093	-2.55446212929552	0.0106351998208961	0.208680559377246
RP11.488C13.5	41.8192003987358	0.806412117572636	0.316013152043715	2.55183087272609	0.0107158522163242	0.209857270249208
RP11.381E24.1	10.2257972157688	-1.12628211186091	0.44141564845767	-2.55152284654204	0.0107253291997697	0.209857270249208
ZNF281	1099.61703489603	-0.805034134872689	0.31556419458197	-2.55109467010072	0.0107385152023451	0.209857270249208
ILDR1	18.4450883535924	1.4467129806025	0.567180429439315	2.55071033045453	0.010750363492367	0.209857270249208
LRRC16B	35.8934844712327	1.13636536047655	0.445563054376237	2.55040302223307	0.0107598454444598	0.209857270249208
FAM126A	3372.10646029257	-0.653669622636923	0.256329210819405	-2.55011756384434	0.0107686598833039	0.209857270249208
RP11.497H16.7	21.6632540918829	1.25807072031058	0.493338548371434	2.55011639464139	0.0107686959993732	0.209857270249208
TP53I13	2597.91426979547	0.425224403533638	0.166763716782454	2.54986163500033	0.0107765679602592	0.209857270249208
ZBED3.AS1	69.8521148027497	1.10315580776276	0.432652770565947	2.54974862710283	0.0107800614922378	0.209857270249208
SYT12	93.0441116281514	1.55725324512782	0.610755930509774	2.54971448877793	0.0107811170441708	0.209857270249208
HS3ST5	10.7213771228028	1.74323562816208	0.683772476559966	2.54943813610667	0.0107896652107333	0.209857270249208
MPP4	48.7281067816788	-1.33887437268104	0.525291986723529	-2.54881933576062	0.0108088278546944	0.209913711850043
ANAPC1	709.491862809328	-0.53964755819822	0.211727001940529	-2.54878949426489	0.0108097527327092	0.209913711850043
RP11.613D13.8	14.1364967927633	1.24335671233783	0.487897753251456	2.54839606055128	0.0108219530103703	0.209983709364843
AGBL5.IT1	11.153260753533	0.83912298554153	0.329322355308577	2.5480292242999	0.0108333395327614	0.2100378186078
UCHL5	1205.85193860721	-0.465442749553549	0.182795879033793	-2.54624312109084	0.0108889321040992	0.210813784452817
RP3.406A7.7	5.09807093461903	1.39533484015518	0.548131842660251	2.54561901272365	0.0109084172077103	0.210813784452817
NEDD4	1256.37207079068	-0.801866437585649	0.315018372375409	-2.54545927445165	0.0109134093271811	0.210813784452817
TSPAN33	1928.79059682864	1.02262050772296	0.401746406662135	2.54543784527979	0.0109140791832761	0.210813784452817
RAB44	14.2112677403917	1.47040692544942	0.57768130384921	2.5453600725033	0.0109165105953094	0.210813784452817
HLA.A	82230.0779428054	0.890053463631027	0.349766600866	2.54470684572887	0.0109369514471699	0.210840394823578
HLA.DOB	128.096921256628	1.33391840100065	0.52421664280745	2.54459376538836	0.0109404934226103	0.210840394823578
MTIF3	1547.7366614126	0.543322340007349	0.213529071461264	2.54448884308435	0.0109437807784312	0.210840394823578
FUBP3	2591.57999019846	-0.361798262054839	0.142226938983084	-2.54380966532557	0.0109650815634414	0.211082018892221
MED14OS	91.0204178563709	0.761437109864563	0.299361373957693	2.54353826546832	0.0109736036674903	0.211082018892221
RAI2	563.57711870967	1.45815495422989	0.573530465236127	2.5424193527881	0.0110088003204668	0.211456237937726
HEATR1	1352.16309383462	-0.621619802709427	0.244504112471499	-2.54236951855723	0.0110103702426128	0.211456237937726
SLC5A1	3.18987992380963	1.76194056299627	0.693154399317667	2.54191643987357	0.011024652657262	0.211456806410864
SNORA5A	3.87177701270982	-0.743551507878284	0.292527269786303	-2.54181946326393	0.0110277117920275	0.211456806410864
GCNT2	99.0590748872342	0.939388651193255	0.369613839997195	2.54154079078961	0.0110365067350169	0.211459469042923
CTB.129P6.7	31.0618368000312	1.46689116109834	0.577372387624275	2.54063268791601	0.0110652098483535	0.211830384982023
CTD.3025N20.3	62.0144839966361	-0.747705363754777	0.294328155651051	-2.54038001257766	0.0110732081387713	0.211830384982023
TMEM86A	750.22970809859	0.701737879179396	0.276300264442274	2.53976549966714	0.0110926816251701	0.212036869656714
RP1.20B11.2	2.12459472654568	-1.29551351141724	0.510286149662767	-2.53879810822498	0.011123399232965	NA
DDB2	1350.53622970888	0.659203090182924	0.259736134456519	2.53797220614784	0.0111496838907495	0.212807589645704
FAIM3	351.748654089224	1.28451036463639	0.506127079791426	2.5379206446842	0.011151326682668	0.212807589645704
LYPLA1	1774.49361591829	-0.45084248159428	0.177659616450842	-2.53767564402587	0.011159135549394	0.212807589645704
MARCH2	2287.36811878569	0.67751355822169	0.26701194689646	2.53739042801861	0.0111682323113822	0.212814935362525
NRTN	56.1691704457941	1.82474287414135	0.719454998286972	2.53628493580013	0.0112035534698121	0.213202414611544
RENBP	1469.1299829198	1.04485712156285	0.412034991649494	2.53584560228729	0.0112176179713523	0.213202414611544
VCPIP1	1240.01401684979	-0.411756746579268	0.162386946725235	-2.53565175577798	0.0112238286155807	0.213202414611544
RP11.167H9.4	11.999433261102	-2.04075437353035	0.804829294688919	-2.53563629827755	0.0112243239895448	0.213202414611544
LCMT1	1950.58749932822	0.554477585404515	0.218695420221787	2.5353872744212	0.011232307253562	0.213202414611544
RP11.505K9.4	7.24803283034012	0.987570419669719	0.389580118336532	2.53496103416813	0.0112459834639277	0.213202414611544
IGKV1.17	26.2484114423303	-2.15606992422722	0.850671073136279	-2.53455182892039	0.0112591270049373	0.213202414611544
ASCL5	9.99943561154009	1.46667474945679	0.57868230126846	2.53450770179401	0.0112605451685241	0.213202414611544
GADD45G	983.161719884547	1.4089925208058	0.555968369287727	2.53430338601981	0.0112671135643499	0.213202414611544
FUT7	63.2774048228707	1.40770548463343	0.555631459403267	2.53352372478201	0.0112922095863207	0.213511910204511
RDH10	2112.2908729209	-1.17622411787973	0.464411593837998	-2.53271910840803	0.0113181609030058	0.213722420137229
PPP2R3A	922.992806605689	-0.819698643895433	0.323654328640892	-2.53263612242592	0.0113208404624657	0.213722420137229
AMELX	3.44991158638888	2.73131454535104	1.07887370185867	2.53163511228939	0.0113532067828106	0.214167944785544
ARPP21	28.8723071536735	-1.98012357553995	0.782435355940319	-2.53071842997211	0.0113829185119555	0.21456274408068
RP11.290F5.1	20.7422896716236	1.61957949034749	0.640253591284445	2.52959063782582	0.0114195674736828	0.215087597389821
RP11.1060G2.2	2.15391078938395	-1.24278755053234	0.491398831460461	-2.52908120851391	0.0114361563057601	NA
AC007879.7	65.3246004826522	-1.39201742024819	0.550635312416215	-2.52802061338919	0.0114707616979473	0.215780957848613
RANGRF	898.009731219594	0.719210577243135	0.284506845954525	2.52792010972591	0.0114740457753223	0.215780957848613
DPY19L2P2	154.616641202719	-1.0783060827356	0.426835568679017	-2.52627981794669	0.011527762347294	0.216365255515197
ADAMTS6	439.658242555861	-1.12177885624859	0.444044979473161	-2.52627303112294	0.0115279850662498	0.216365255515197
RP11.435F13.2	11.2787438001014	1.15494026314829	0.457191999822039	2.52616026439188	0.0115316862205079	0.216365255515197
RP11.45P15.4	60.744226503707	0.817226786395255	0.323553456523246	2.52578598657789	0.0115439780761877	0.216429654967913
IGF2BP3	190.195300063679	-1.62229276506285	0.642364230461682	-2.52550295942984	0.0115532808394954	0.216437958303706
PRMT7	1553.91377536561	0.499129858606057	0.197687366922989	2.52484448740974	0.0115749497731871	0.216534201898544
SLC9A3	46.0149998338209	1.41966015617156	0.562284363541106	2.5248081722048	0.0115761458790576	0.216534201898544
CCL3L3	143.78409860922	1.32474746683266	0.524900298381088	2.52380779915439	0.0116091380974677	0.216985183307605
CD99P1	209.152667414661	-0.684679188843397	0.271319152790703	-2.52351955916493	0.0116186596975741	0.216997123663638
OTUD5	6244.19679298088	0.526635421368332	0.208734468424471	2.52299213131103	0.011636100471002	0.217143835147199
PGAP3	1109.75071006606	0.591007560835148	0.234271655077858	2.52274463438068	0.011644292604807	0.217143835147199
LINC00324	167.942030163	1.02419441768873	0.406111629509821	2.52195293920773	0.0116705320421563	0.217174218051636
CCDC22	2023.60923550329	0.528748860994936	0.209676693969475	2.5217340610679	0.0116777956486976	0.217174218051636
RP11.74E22.8	23.6919268826731	1.70329324249855	0.675464810184831	2.52166096118682	0.0116802224067207	0.217174218051636
GALK1	1901.34280022351	0.561153470981674	0.222536622322527	2.52162302602213	0.0116814819484977	0.217174218051636
C22orf46	1443.86818479496	-0.659010432850939	0.261387305249089	-2.52120290318971	0.0116954391295192	0.217268351707243
IGLV3.19	409.920422981786	2.67160404182141	1.05985465425038	2.52072681014077	0.0117112736137778	0.217397190813812
IGSF1	59.3355602637968	1.73022227235253	0.686577930194843	2.52006683620243	0.011733255285844	0.217560435776941
AC098614.2	130.571947199787	-0.802023649144253	0.318272428135123	-2.5199281440859	0.0117378793382458	0.217560435776941
TTC30A	292.788561101466	-0.62445406188814	0.247887292733409	-2.51910477137572	0.0117653642220577	0.217894802559898
ZNF138	308.891767310883	-0.50682434888105	0.20124481276153	-2.51844677100633	0.0117873698567667	0.217894802559898
MED18	946.557880359912	0.570842933744714	0.226705575238623	2.51799248052838	0.011802584075966	0.217894802559898
NUP210L	7.48442084607737	1.17768411339899	0.467734251342174	2.51784877848821	0.0118074002916609	0.217894802559898
ENSG00000242338	14.5237690083876	-0.552002765985883	0.219257288380199	-2.51760281295048	0.01181564794326	0.217894802559898
HPD	66.898854912063	1.59883826120624	0.635159278812743	2.5172241271431	0.0118283559245826	0.217894802559898
KLHDC7B	1667.26211776544	1.87000183608616	0.742885386758634	2.51721445786594	0.0118286805659209	0.217894802559898
TUBA8	14.8055162689754	1.19655633650995	0.475378922472335	2.51705803506588	0.0118339334843274	0.217894802559898
TMEM187	698.957258231828	0.717180364134083	0.284935641464236	2.51699071568799	0.0118361948093244	0.217894802559898
DDX11L10	1.94955422653321	2.22217033331277	0.883051168313533	2.516468369049	0.0118537539796679	NA
AF131216.6	8.83551880306216	-0.934409963114916	0.371321572268065	-2.51644405523616	0.0118545718735595	0.218068777333724
SULT1A2	26.0074518443301	1.49886330630058	0.595723399435105	2.51603900018344	0.0118682049095128	0.218155287986824
TNFRSF14	3484.22006410877	0.829342441042513	0.329694612275495	2.51548678735918	0.011886813266299	0.218333053595803
C2orf50	5.92341553941116	1.27495791778173	0.506996912110426	2.51472521296943	0.0119125190891428	0.218640818053094
WNT1	6.60007482713438	1.96857654976468	0.783651007149947	2.51205770400803	0.0120029460312032	0.220069524155232
CXXC1	3156.61862998171	0.498081460993455	0.198295130352123	2.51181892419136	0.0120110701191661	0.220069524155232
ITCH	2764.31550748713	-0.432344965042001	0.172136973317521	-2.51163336213949	0.0120173869263203	0.220069524155232
ADAM15	7620.40323417964	0.592318787753389	0.23587086063793	2.51119950192839	0.0120321676640663	0.220175148962904
CNR2	12.6319070528141	1.8109739282502	0.721373458757973	2.51045267366538	0.0120576483361044	0.22047626587028
DIEXF	1175.70427898566	-0.473058504731618	0.188546201632165	-2.50897923499148	0.0121080601839088	0.221232462402923
MRAP	2.15105096358359	2.48244088999621	0.98961056091436	2.50850282731678	0.0121243997880676	NA
PCDHB6	160.083606481048	1.44232586685448	0.575136695366749	2.50779663073793	0.0121486565365041	0.221808318781958
CRY1	1269.63831330933	-0.609630792013034	0.243169239573192	-2.5070226525487	0.0121752908647074	0.221903513606088
RP11.145M4.3	83.039444294854	1.52168098149605	0.606994052618165	2.50691250586813	0.0121790854622876	0.221903513606088
CHCHD10	1113.2470869399	1.11051266661604	0.443076928574137	2.50636536230803	0.0121979503152316	0.221903513606088
CWC22	1327.26981237525	-0.445374430710336	0.177699295645706	-2.50633762554871	0.0121989073345768	0.221903513606088
DEFB1	209.285323307735	2.48582712747447	0.991820917644969	2.50632657897249	0.0121992885002651	0.221903513606088
RP1.35C21.1	3.5196572680561	1.63621188316337	0.65290724989912	2.50604030421807	0.0122091701845695	0.221918019671762
SETD2	3410.16572177115	-0.494108953778245	0.19724031708553	-2.50511133362244	0.0122412854293165	0.222231446184962
TSPAN32	139.690841291356	1.33990134369001	0.534914226321787	2.50489008846059	0.0122489450755053	0.222231446184962
COX4I1	14877.2941241625	0.748577147742312	0.298862701520543	2.5047526637942	0.0122537049413052	0.222231446184962
CPTP	2350.81474647584	0.492623146243795	0.196708426799121	2.50433168654672	0.0122682961867372	0.222331014499855
SLC37A4	742.545909263646	0.490909562359952	0.196061695350038	2.50385248114635	0.0122849243764721	0.222467322159256
NENF	3948.37642680985	0.832100007007643	0.33240239441334	2.50329125479443	0.0123044240353298	0.222655388710424
CTD.2639E6.4	4.391409896749	1.293212202362	0.516669350844627	2.50297835597935	0.0123153075214508	0.22268737782496
CTD.2287O16.1	359.611821925884	0.840990049331813	0.336047180562075	2.50259516513475	0.0123286475749243	0.222743101085778
AQP1	10155.0464519398	-1.2212809704052	0.488050460877436	-2.50236618608972	0.0123366251491693	0.222743101085778
RSF1	2284.52474328248	-0.606551374602833	0.242430624848609	-2.50195854992169	0.0123508384109557	0.222835030680382
RP11.265N7.1	3.59596215227032	-1.82550167692458	0.729843098060174	-2.50122482733141	0.0123764580521578	0.223132467716725
PRSS16	8.5480661596384	1.83400254633766	0.733430771288405	2.50058031123496	0.0123990016632723	0.223214483124477
TNFRSF18	218.430126382568	1.49225724189318	0.596766282519807	2.50057231047342	0.0123992817389134	0.223214483124477
RP5.899E9.1	56.176468149214	1.30865115966349	0.52342850645567	2.50015263502719	0.0124139808071101	0.22321531315214
SLC37A1	546.402953634708	1.0563082928374	0.422514985118162	2.50004930012598	0.0124176024632101	0.22321531315214
TMEM238	23.3565158504239	0.770858709364508	0.308607931604664	2.49785773604809	0.0124946325522972	0.224434837220638
LKAAEAR1	5.71392045350678	1.70578735602344	0.683031570479607	2.4973770316732	0.0125115850448393	0.224486782023137
RP11.348H3.2	3.45161835199512	1.17736956062148	0.471465553611178	2.49725468086364	0.0125159031116915	0.224486782023137
RNU6.529P	26.8091582458254	0.923068140397147	0.369716606937749	2.49669104139692	0.0125358124082369	0.224577094317351
NPW	27.6777650604712	1.37346152942268	0.550134621993692	2.49659169685638	0.0125393244360746	0.224577094317351
ZNF815P	81.4275127836642	0.811430413580155	0.325082454948669	2.49607569165269	0.0125575802682268	0.224739288184992
REC8	409.088010913889	1.02953515405071	0.412600933986749	2.49523224318192	0.0125874714421448	0.225027802395731
PLA2G2D	886.251183979575	2.49551692770802	1.00017005658399	2.49509262078019	0.0125924256263768	0.225027802395731
RPLP2	50505.6464728995	0.8012785141064	0.321219118751296	2.4944919755128	0.0126137578535788	0.225027802395731
CYTH4	3073.22684153315	1.00368587222661	0.402424213630328	2.49409910793441	0.0126277280489833	0.225027802395731
UROD	5599.06876425723	0.476234678504629	0.190954410013528	2.49397056852938	0.0126323018256837	0.225027802395731
HMGA1	7456.82141528683	-1.3610568388965	0.545769067464125	-2.49383286821394	0.0126372031991132	0.225027802395731
TMEM127	6224.87192786269	0.288434166672346	0.115660255252511	2.49380537888865	0.0126381818693742	0.225027802395731
MAT1A	44.8216955289942	1.79447275576093	0.71970656374261	2.49333943326754	0.0126547805955631	0.225159239016031
CPNE3	3773.04333861103	-0.498235621637023	0.199966631885055	-2.49159380712788	0.0127171380343742	0.22610405024871
RASSF9	193.50939143565	-1.2411886330064	0.498284834244769	-2.49092195408199	0.0127412104225865	0.226239841573236
LEPR	738.671177738571	-1.08464149349318	0.435447942092911	-2.49086374890193	0.0127432978019883	0.226239841573236
NPAS3	192.414361096643	1.41163885736653	0.566833232117344	2.49039537095153	0.0127601059950345	0.226373732282278
BAIAP2L2	93.9018451414536	1.17098019396698	0.470332905043047	2.48968375678458	0.0127856805038612	0.226409075900102
SFRP1	3017.33962483684	2.19201429946465	0.880491508935456	2.48953485322632	0.0127910376438194	0.226409075900102
FOXA3	4.99815309572175	-1.31985391416229	0.530201317760209	-2.48934483931105	0.012797876705827	0.226409075900102
GDPGP1	142.537936264163	0.539803797695939	0.216848859715065	2.48930890577534	0.0127991704047665	0.226409075900102
GLRA4	7.52577049274615	1.90152311353143	0.76449770810315	2.48728425654726	0.0128722501569159	0.227101761461174
CFAP97	1606.82338408499	-0.566401661911455	0.227727079473805	-2.48719503723582	0.0128754790056051	0.227101761461174
EPS8	3923.13353103894	-0.721989606259004	0.290291719306083	-2.48711746923011	0.0128782867756198	0.227101761461174
PGAP2	639.609852806139	0.392949661406251	0.158001122975416	2.48700549721657	0.012882340841102	0.227101761461174
S1PR4	203.108311598814	1.3848547547951	0.556908599325046	2.48668229665244	0.012894048994353	0.227101761461174
YWHAEP5	5.18866329601768	-0.858898844217225	0.345414392268995	-2.48657514985175	0.012897932535132	0.227101761461174
TALDO1	7322.13371369916	0.620704493435469	0.249637403007783	2.48642425356474	0.0129034035330185	0.227101761461174
SCUBE1	761.471019424256	2.42683541512414	0.976712778262792	2.48469710761907	0.0129661704996027	0.227940125628539
PHEX	216.715785006572	1.2519151834903	0.503933845073908	2.48428478406068	0.0129811948077269	0.227940125628539
UNC5B.AS1	30.4413080968572	1.63958030876282	0.659992533304319	2.48424069368496	0.0129828022905486	0.227940125628539
ADM5	41.3495462350763	0.954424426491784	0.384215179818644	2.48408828339965	0.0129883603452833	0.227940125628539
ATP6V0E1	10330.8266416013	0.650760315282248	0.262053147309739	2.48331425118535	0.0130166200315941	0.228272082377468
NEK8	214.534821651964	0.602343569311345	0.242592211378277	2.48294685921348	0.0130300524265128	0.228343723620718
RP11.973H7.1	9.17013800992287	1.78481622210079	0.71897948564088	2.4824299687909	0.013048971464723	0.228485759516746
CLNS1A	3172.90100029961	-0.57148783168928	0.230233052706473	-2.48221454292176	0.013056863575479	0.228485759516746
LPAR1	4511.26022029976	-0.576587640791414	0.232480195362829	-2.48015810504435	0.0131324137763924	0.229558620470673
RP11.325D8.1	3.84407393647632	2.48991873760766	1.00398551601281	2.48003452031463	0.0131369663685783	0.229558620470673
RBFOX2	8059.65798085241	-0.54194963428981	0.218565690160976	-2.47957322986356	0.0131539716327601	0.229691474636667
ST3GAL5	1092.35985471345	0.759127020863762	0.306205239396194	2.47914445344137	0.0131697957340615	0.22980352856242
RP11.45A16.4	4.95709037998166	1.62903403272984	0.657227130910542	2.47864696406085	0.0131881767969476	0.229960007832
RP1.79C4.1	2.95688974418887	1.6245186099279	0.655487667822156	2.47833588589901	0.0131996819266972	NA
PDDC1	2783.47330598526	0.507486388723954	0.204786625453167	2.47812271724753	0.0132075710267366	0.230133917697681
DIS3	1577.06247977612	-0.479367090576639	0.193471354058469	-2.47771610897895	0.0132226306410298	0.230232105438145
DNAH8	11.4366710057494	-1.5103918238714	0.610036737772032	-2.47590305690053	0.0132899658612146	0.231058951740183
ERP27	28.4985018060447	1.01941665943729	0.411779572339465	2.47563679190209	0.0132998802027697	0.231058951740183
CASQ2	60.268853665982	-1.54513826423717	0.624178182041621	-2.47547624811747	0.0133058611880547	0.231058951740183
RP11.477I4.4	28.3655330309344	0.936082688655411	0.378151032736609	2.47542015654738	0.0133079514142387	0.231058951740183
MRPL32	1864.01343765391	-0.469016479475257	0.189500744060628	-2.4750112818829	0.0133231967090735	0.231159355401958
TCF20	2026.29431029959	-0.517482147363532	0.209241979398124	-2.47312775788132	0.0133936252914094	0.23210289558827
RP11.464F9.22	19.0927959874938	1.01849044503633	0.411835951323672	2.47304889668525	0.0133965812263891	0.23210289558827
LMNTD2	36.7211341253586	0.921437814896167	0.372671439288459	2.47252061133386	0.0134163976895098	0.232281487708742
SRR	650.972044589899	-0.534253914285908	0.216177171891898	-2.47137063368129	0.0134596239908478	0.232666514703221
RAB39B	77.570260185344	1.21956758090095	0.493494332837078	2.47128994144615	0.0134626617323289	0.232666514703221
COMMD9	2519.0536870707	0.459326442875707	0.185920313582765	2.47055544401947	0.0134903405046581	0.232666514703221
AC091729.9	236.255459732051	-0.744140129324923	0.30124115007182	-2.47024727248422	0.0135019685954728	0.232666514703221
HRCT1	459.570336985088	1.33151567503504	0.539095542857778	2.46990666622208	0.013514830833174	0.232666514703221
FAIM2	752.198339359587	1.72231569850202	0.697379943670662	2.46969491183903	0.0135228327228287	0.232666514703221
SSTR3	15.1101640576139	1.97039051861744	0.797846760468264	2.46963529370101	0.0135250863604814	0.232666514703221
IPO9	4390.07309756626	-0.53419325374569	0.216349582673164	-2.46912079582186	0.0135445487950009	0.232666514703221
STAC2	298.937204505592	1.96431408967193	0.795617017107996	2.46891915008562	0.0135521834001337	0.232666514703221
TMEM63C	18.0729837934041	1.16171412846573	0.470536182903303	2.46891561303048	0.0135523173521848	0.232666514703221
SYTL1	243.003040868295	1.34956910981854	0.546682235993335	2.46865367294466	0.0135622405541972	0.232666514703221
GZMM	173.462239407626	1.53546296940642	0.622059178528637	2.4683551379119	0.0135735579269298	0.232666514703221
MAGEE2	6.51444921856139	2.39290763967158	0.969520039247119	2.46813633839874	0.0135818578478832	0.232666514703221
RP11.11N9.4	76.0114844678525	1.3877963388535	0.562303130890917	2.46805728549771	0.0135848577359403	0.232666514703221
RP1.34B20.4	26.5475885922745	1.70276195722744	0.689945761690232	2.46796494996362	0.0135883624125919	0.232666514703221
CACNA1B	23.2186411322005	2.17610665867434	0.881766359850534	2.46789485033564	0.0135910236391787	0.232666514703221
CTC.479C5.12	130.643305195725	0.804699475557632	0.326128003986679	2.46743446045959	0.0136085130911324	0.232674236534225
AKR1A1	7461.11888217447	0.481639457747729	0.195202665168268	2.4673815663969	0.0136105237221093	0.232674236534225
MAP7	152.282917197861	0.933147466134235	0.378290624564864	2.4667475362563	0.0136346451718654	0.232923599233217
LINC00942	35.4381649171446	-1.46724579750939	0.595089028908833	-2.46559040115351	0.0136787653278598	0.233380947929138
DNAJC28	42.9595697792658	0.662567593212846	0.268730754566011	2.46554434859108	0.0136805238623982	0.233380947929138
TIMM8BP2	3.69892982957141	1.08803354437291	0.441428226607843	2.46480283495668	0.0137088663467809	0.233692910218802
C14orf119	3320.18439340892	0.452568968386004	0.18363478576983	2.46450565718664	0.0137202397650482	0.233692910218802
LMOD3	13.8021235389758	1.23299500031944	0.500339684109735	2.46431582278614	0.0137275093603496	0.233692910218802
OR10V2P	2.1047865653747	-2.11271837600016	0.857399227347941	-2.4641010962129	0.0137357362865485	NA
HLA.F.AS1	162.055276372284	0.707449327120063	0.287109393130517	2.46404103817831	0.0137380380990898	0.233709284625812
CFAP69	148.989973974898	-0.781750009222856	0.317339062022876	-2.46345345650042	0.0137605760080346	0.233929792136589
PMVK	3000.52120296734	0.623398454868344	0.253091092528527	2.4631386614212	0.0137726640514457	0.233972468784957
SERTAD1	1691.51981862258	0.802208774144729	0.325766543365557	2.46252658685253	0.0137961943897098	0.234209334778472
ARHGEF6	2654.0879164208	-0.571795442205381	0.2322727045707	-2.46174187045441	0.0138264136256567	0.234432332202977
RORA	1231.42170600388	-0.931268591253238	0.378327697392803	-2.46153955333156	0.0138342142793753	0.234432332202977
ACSM5	160.902094652282	1.29549861218207	0.52631772658347	2.4614383038011	0.0138381195725037	0.234432332202977
AC010970.2	8.65018387990285	2.31398411059614	0.940307442295815	2.46088035307517	0.0138596577432955	0.234546047822733
ATOX1	3743.926827074	0.739848651689915	0.30065966312832	2.46075128266924	0.0138646443688729	0.234546047822733
WNT16	43.9726067697839	-1.6745922833077	0.680601796439231	-2.4604582181076	0.0138759727788556	0.234546047822733
SCML4	79.4260977318873	1.76297020174562	0.716633256360259	2.46007310726779	0.0138908716627174	0.234546047822733
BNC1	275.92498087876	-2.03956201212519	0.829162093065678	-2.45978684889498	0.0139019553644896	0.234546047822733
RP11.394O4.3	4.50986686203108	1.155263687875	0.469662462905276	2.45977436801884	0.0139024387918997	0.234546047822733
FAM195A	1210.16858496759	1.04746888163544	0.4258867845935	2.45950078642433	0.0139130392802351	0.234562896188311
COQ3	506.733811516855	0.828216657497667	0.336776358722266	2.45924821041457	0.0139228321978417	0.234566115697293
ASCL1	11.7265830459367	1.95959596215097	0.797052502875761	2.4585531757077	0.0139498116143041	0.234858682236964
HSD17B14	580.354251056174	0.896148804738755	0.364741138383069	2.45694469428775	0.0140124256880106	0.235578047455561
RPL21P28	97.8906221921724	1.14100511527724	0.464429297671671	2.45678970081659	0.0140184722717035	0.235578047455561
SEC1P	28.6357198992282	1.17151997731844	0.476864830827436	2.45671289133583	0.0140214696058122	0.235578047455561
FAM87B	119.784547258913	1.31125663552936	0.533902882460465	2.45598343557634	0.0140499633434193	0.235894539186523
IPCEF1	164.597566433569	1.23137704890414	0.501472200122895	2.45552405218548	0.0140679338268388	0.235961209507185
IFI35	2943.14180158865	0.911514529841644	0.371230314087752	2.4553881923182	0.0140732523743079	0.235961209507185
RP11.370B6.1	2.96657669578505	1.88087405716408	0.766051586914374	2.45528380763516	0.014077339958624	NA
FAM92A1	1641.42681076779	-0.462904788078574	0.188593018415271	-2.45451709701832	0.0141073955914831	0.236371445064706
RP11.116D17.5	3.22202984069703	1.90011189638742	0.774635315341126	2.45291152979601	0.0141705185535754	0.237093336819935
NCR1	15.5056498259027	1.59119447644031	0.64874574629741	2.45272433079021	0.0141778944910419	0.237093336819935
CCDC42	6.49395695077983	1.4262986307367	0.581559031029854	2.45254317211951	0.0141850356549528	0.237093336819935
FOLR2	7026.19356252832	1.05785627966558	0.431349368218161	2.45243498103503	0.0141893019947908	0.237093336819935
C16orf47	45.2149277460743	1.20066532222005	0.489784251126915	2.45141676045628	0.0142295093714682	0.237512502558232
RP11.385F7.1	13.3466054314871	1.03597465732265	0.422621270630383	2.4513074218375	0.0142338328930882	0.237512502558232
ASIC4	18.454320452621	1.13333297177554	0.462640846655063	2.44970365234641	0.014297383246538	0.238172687347488
STAR	16.8390315619984	1.37021541880428	0.559444617948902	2.44924229287952	0.0143157111973923	0.238172687347488
UPK3BL	21.3556023271656	2.22222247200478	0.907336880376336	2.44917022559809	0.0143185760105865	0.238172687347488
RAB6C	5.08050344907217	1.70115859801605	0.694586091360916	2.44916882035881	0.0143186318765797	0.238172687347488
ARMC8	1589.41763858446	-0.362167079270442	0.147893301145363	-2.44884032248676	0.0143316967516208	0.238172687347488
BFSP2	8.99685580680746	1.67245769508059	0.683003857166937	2.44867972198262	0.0143380879115219	0.238172687347488
BAK1P1	7.2213240769837	-0.810189947552092	0.330880146990449	-2.4485903881549	0.0143416440741805	0.238172687347488
KCTD2	2731.73739686095	0.457496325588029	0.186954534823762	2.44709937643021	0.0144011125886699	0.23895316038138
AGAP3	7171.40631449041	0.614281933211748	0.251062517822269	2.44672896034049	0.0144159201972622	0.23895316038138
C1orf127	45.1442039899308	1.05981536785622	0.433204868944517	2.44645303834745	0.0144269590718486	0.23895316038138
IGFBP4	45898.5744235793	0.895238868949171	0.365953150820884	2.44632097562495	0.0144322451729229	0.23895316038138
ZC2HC1A	524.032268759396	-0.735702686492696	0.300754695118788	-2.44618853315696	0.0144375481895664	0.23895316038138
JTB	9028.0447732171	0.507698535377822	0.207620360550468	2.44532151871691	0.0144723060453359	0.239014801490523
RP11.404P21.9	15.2009187992162	1.42064480330372	0.580984084478359	2.4452387617111	0.0144756275564683	0.239014801490523
RPL3P4	757.345001246381	0.952532464067159	0.38954994118631	2.4452127015252	0.0144766736396785	0.239014801490523
C8G	43.9343126038225	1.27432463568549	0.521170662587683	2.44511966456111	0.0144804087848858	0.239014801490523
RP11.49I11.4	33.1360201861308	1.08497291521221	0.444001771495704	2.44362294221773	0.0145406144509866	0.239721820345391
FASTK	5498.22921018498	0.588625381135298	0.240928198883404	2.44315685695289	0.0145594077464282	0.239721820345391
NDUFA3	2323.20358886675	0.753266594876357	0.308322435457667	2.44311314471237	0.0145611713910893	0.239721820345391
CD209	3413.59767500614	1.3282572035837	0.543681341894463	2.4430803509927	0.014562494633123	0.239721820345391
MRPL23	1437.06432777005	0.857668687447978	0.351142431931459	2.44250939064918	0.0145855501499073	0.239939666405445
PNKD	2523.34989648971	0.508369333624115	0.208194915634189	2.4417951421895	0.0146144369801767	0.24023045551319
CDC42EP3	2230.08703687292	-0.859205454504509	0.35210547281356	-2.44019341034059	0.0146794003374993	0.24023045551319
RP11.545I5.3	239.42241710609	1.08516796731818	0.444731007097606	2.44005466225569	0.0146850396713394	0.24023045551319
RP11.468E2.10	28.8155796253356	0.800597814396571	0.328115344749999	2.43998894659002	0.0146877113120573	0.24023045551319
ACSS1	1216.63256217093	0.758715080160468	0.310999169919875	2.43960483996128	0.0147033355657473	0.24023045551319
ANKRD1	130.208828847005	-1.97916591848617	0.811273859216761	-2.43957807342263	0.0147044248904433	0.24023045551319
AQP7P1	4.83121332080123	2.51424762635478	1.03074627298055	2.43924978654978	0.0147177910532165	0.24023045551319
RBFOX3	8.16125122833665	1.05944341377256	0.434337725530782	2.43921573351213	0.0147191781316085	0.24023045551319
EMBP1	60.1307340053022	0.906335052942626	0.371640627787754	2.43874050675708	0.0147385475146922	0.24023045551319
TIPARP	1222.89719297883	-0.80693446438158	0.330902124741242	-2.43858955276454	0.0147447048259219	0.24023045551319
FAM170B	5.56989749943646	2.10486154665268	0.863192284484166	2.43846195626102	0.0147499111689307	0.24023045551319
RP11.535A19.2	3.82942619092051	-1.11855437256935	0.458748273474787	-2.43827483882798	0.0147575490852848	0.24023045551319
CSTB	11754.4404990653	1.02945672762316	0.422252874094682	2.43800999538567	0.0147683656454288	0.24023045551319
RP11.95M15.2	4.48161697857205	1.60604803036735	0.658808663636791	2.43780648162936	0.0147766821660047	0.24023045551319
TC2N	220.285013150889	1.34985949140542	0.553755055975701	2.43764725367068	0.0147831918400805	0.24023045551319
AC123886.2	3.34422729284099	1.57115220231852	0.644561462290117	2.43755218739923	0.0147870796138305	0.24023045551319
AC006538.1	140.550597908411	1.02740790298874	0.421492850193004	2.43754526919801	0.014787362571645	0.24023045551319
MME	12302.5874516177	-1.48458917859708	0.609057152520828	-2.43752030897676	0.0147883834965706	0.24023045551319
ULK1	4847.23669276737	0.613006594138049	0.251517803754762	2.43722943261604	0.0148002855249071	0.24023045551319
POU3F2	30.4664537834028	1.82041217447759	0.747083115714792	2.43669296787127	0.0148222586387372	0.24023045551319
OXA1L	5810.14869412551	0.389198557846371	0.159733782573101	2.43654505375691	0.0148283221214912	0.24023045551319
PKD1L1	47.6156724992284	-0.714200746994624	0.293122011360704	-2.43653058901728	0.0148289151957325	0.24023045551319
HLA.H	2551.34534450072	0.848379361954776	0.348197325785296	2.43649017131711	0.0148305724878952	0.24023045551319
NLGN4X	476.018149981711	2.16953482167272	0.890511685489912	2.43627889114016	0.0148392385021656	0.24023045551319
UACA	4337.61749245757	-0.639214663570172	0.26241874501459	-2.43585748241664	0.0148565366214031	0.240351213989573
TRAPPC1	4952.20027233983	0.71270762706487	0.292630955942632	2.43551686037136	0.0148705315659935	0.240372319501838
RNF207	232.663866184027	-0.971585127720024	0.398970015705061	-2.43523344981962	0.0148821847465288	0.240372319501838
AC017104.3	1.94530446979292	-1.1585122480202	0.475734678305834	-2.43520664111737	0.0148832874742514	NA
SLC24A3	322.038706737512	1.69395467531715	0.695672128840633	2.43498999757285	0.0148922013585572	0.240372319501838
WDR3	1894.18583850952	-0.522201060673615	0.214467863965307	-2.43486856733971	0.0148971997104172	0.240372319501838
RAD18	946.037694665493	-0.593740407449327	0.24387542315892	-2.4346053397206	0.0149080398489414	0.240388452455306
U2SURP	3204.97968172284	-0.412414556536676	0.169429605058986	-2.43413514652941	0.0149274204594461	0.240542186282196
FBXL13	82.1303748234037	-1.04074945276064	0.427696882050591	-2.43338096777974	0.0149585528580315	0.240884962273469
OCIAD2	714.353945248984	1.16179520278774	0.477558701853465	2.43277988293098	0.0149834065086313	0.241035818661596
RAB33A	150.755493986556	0.965384036573861	0.396858642272509	2.4325639755401	0.0149923427213758	0.241035818661596
LINC01411	21.0419920235907	2.20177265110847	0.905170789994178	2.43243891147066	0.0149975211578708	0.241035818661596
GPR17	12.7536099519154	1.47071644217648	0.604689198925461	2.43218573242246	0.0150080091813332	0.241045796377902
PHYHIPL	13.6123027086418	1.36879206104015	0.562978410601994	2.43134023483511	0.0150430810204559	0.241201901264381
TRAF3IP2	1765.66306480426	0.657350052039676	0.270412812117217	2.43091311721847	0.0150608255921899	0.241201901264381
FZD10.AS1	86.256009426638	1.57148677198821	0.64649138541135	2.43079305842305	0.0150658167448025	0.241201901264381
CCDC147.AS1	48.3494540850309	1.45693951233687	0.599414753297429	2.43060335822922	0.0150737060389048	0.241201901264381
pk	3723.95851256716	-0.656663347784714	0.270181649390786	-2.43045132511915	0.0150800314523498	0.241201901264381
PREB	3811.73688340317	0.531343150427162	0.218619497239117	2.43044722514388	0.0150802020662361	0.241201901264381
C10orf128	559.310488635638	0.913841100254463	0.376021784514741	2.43028765323739	0.0150868437157466	0.241201901264381
NOMO1	2601.34151347209	0.571447901961282	0.235168247361074	2.4299534838302	0.0151007607524665	0.241266503873122
GALNT15	3629.40631048727	1.26265893709408	0.519828091469234	2.4289932726131	0.0151408132753956	0.241748318630483
CMTM8	275.809088344644	1.26720225347056	0.521768217957541	2.42866891822392	0.0151543639337825	0.241797348120346
MGST2	1108.82068947491	0.581313858026997	0.239376885559448	2.42844607435012	0.0151636799427062	0.241797348120346
POLH	731.564332873513	-0.556582979028745	0.229223423009834	-2.42812436757331	0.0151771378200526	0.24185171195088
GPR143	25.4411302062345	1.33408818879448	0.549536888482956	2.42765902845456	0.0151966228421	0.24185171195088
RSPO1	6.22834117384853	1.74271323107031	0.71785867421421	2.42765504363088	0.0151967897926481	0.24185171195088
LINC01185	1.88046752427244	1.96223935897349	0.808406299070271	2.42729350480101	0.0152119437611813	NA
C4orf48	337.900543035497	1.13900227472663	0.469323462689887	2.42690247830044	0.0152283486876197	0.241869923788914
CCDC69	1569.74539067209	1.22043872346186	0.502887968894314	2.42686005422878	0.0152301294618602	0.241869923788914
TRH	6.09683813275406	1.75197159173726	0.721950594136816	2.42671950956972	0.0152360302128252	0.241869923788914
CHMP2B	3402.95530617956	-0.761253905071068	0.313737163266198	-2.42640654089539	0.0152491773984278	0.241869923788914
NOVA2	413.899992719559	0.986900882249268	0.406763483084465	2.42622782843153	0.0152566892297009	0.241869923788914
GCHFR	99.7858798433361	0.897658399691052	0.369983442512704	2.42621235586841	0.0152573397420572	0.241869923788914
RIN2	3554.05898677986	-0.587644666062843	0.242245027702676	-2.42582756655835	0.0152735252810575	0.241969487088816
MOK	1014.19878526112	-0.959126137053492	0.395460419976194	-2.42534040982213	0.0152940384232925	0.242137436579788
LINC00707	4.15094700833977	1.81324735285326	0.747786518590891	2.42481952773112	0.0153159984971156	0.242272209158911
LINC01391	3.75222831345788	-2.14963003392993	0.88656669842837	-2.42466814706735	0.0153223858181062	0.242272209158911
AC008592.4	2.24254560941109	1.46626568521173	0.604797476546143	2.42439120874848	0.0153340769592669	NA
GTSE1	1430.77236004727	-0.7552062254537	0.311585114027502	-2.4237557940173	0.0153609311117805	0.242724570588412
GPC1	8598.66154090471	1.12834846636568	0.46567433015734	2.4230420130404	0.0153911465740258	0.242788422423472
PAX2	3.36611135948094	2.47788655234719	1.02264112129377	2.42302651512033	0.0153918032050339	0.242788422423472
GPX4	20288.4290962874	0.737664432196402	0.304472856646627	2.4227592578229	0.0154031305028376	0.242788422423472
ST13P6	8.68354351153964	-0.633794182536247	0.261604212468179	-2.42272162422973	0.0154047261351829	0.242788422423472
SLC28A2	4.66135129196844	1.45879349091501	0.602249883326886	2.42223955753465	0.0154251782248998	0.24295401602584
TMEM74B	90.2274750592929	0.817505424673247	0.337583274523732	2.42164078130528	0.0154506150920062	0.243120393782157
RET	150.138028768302	1.4787441454566	0.610667118887164	2.42152246243642	0.0154556458120958	0.243120393782157
GPR112	7.01431904559365	2.46086161372353	1.01639427566648	2.42116831296583	0.015470712270673	0.243200791544575
ZACN	30.6961347097504	0.622226253899476	0.257027926931596	2.42085076640357	0.0154842325338005	0.243256795220716
RP11.389O22.1	16.6801235264005	0.813462764526452	0.336183707730319	2.41969716503632	0.0155334372675791	0.243872968515225
NEK10	43.1724281643514	-0.752401333698707	0.310993209156669	-2.41934972065474	0.0155482838014067	0.243949277446734
LCTL	31.9212474325189	-1.22592185769553	0.506915301671548	-2.41839584177686	0.0155891079084738	0.244186948727271
CSGALNACT2	1852.81170558252	-0.525326151144486	0.217224827278253	-2.41835225616993	0.0155909755363437	0.244186948727271
SETP14	12.9900913198327	-0.611165364401218	0.252748763486171	-2.41807459696893	0.0156028777575739	0.244186948727271
ZNF775	1002.15937761873	0.571649381060409	0.236450429396502	2.41762885573709	0.0156220017517863	0.244186948727271
TMEM106A	694.215151552525	0.604807624475115	0.250176331366657	2.41752535570087	0.0156264452461295	0.244186948727271
CHID1	4725.25929448805	0.463353376879234	0.191666682198869	2.41749568346192	0.0156277193485981	0.244186948727271
RP11.480I12.5	18.4305792463759	1.09627084723476	0.453498578825918	2.41736335772637	0.0156334024237362	0.244186948727271
CA5A	8.30312948029144	1.61468050458351	0.668111924212612	2.41678144943522	0.015658415583416	0.244421363761834
PI4KAP2	273.762646470229	-0.713512265701867	0.295310507588742	-2.41614249194114	0.0156859215358807	0.244694366028116
ORAI3	1273.32556006717	0.779567532557093	0.32277372419465	2.41521373681264	0.0157259785408159	0.244736722894153
NPY1R	47.3968621883737	1.46269994203423	0.60563082201028	2.41516760520718	0.015727970530457	0.244736722894153
EXT2	6441.82940799114	0.459898056156134	0.190438293821345	2.41494526614262	0.015737574374103	0.244736722894153
ZBP1	162.106555296501	1.55395762464924	0.643534742050479	2.41472219463693	0.015747215038798	0.244736722894153
RP11.303E16.2	470.345483334865	0.778284741877801	0.322317597106697	2.41465172508147	0.0157502616590752	0.244736722894153
FIBCD1	50.4266038785503	1.80835801779863	0.748934413245821	2.4145746086915	0.0157535962370077	0.244736722894153
PTRHD1	787.904815754663	0.552769088320992	0.228941547342424	2.41445510759227	0.0157587647923576	0.244736722894153
GIT1	4219.40708961634	0.353091560079354	0.146375926410781	2.41222425529495	0.0158555258316142	0.246082999072746
RP11.490O6.2	4.54050016038817	0.946182647388247	0.392311715164128	2.41181338923922	0.0158734036106077	0.24620404876415
ARF5	7963.857704721	0.376003183244225	0.155915756683502	2.41157911966195	0.0158836051817135	0.246205958746243
POMT1	2052.30822355132	0.394885597941714	0.163784287644551	2.41101026002387	0.0159084009100432	0.246228787995828
CAPS	1299.43679185048	1.00473444265839	0.416738609806934	2.41094637985155	0.0159111874744439	0.246228787995828
UBL7.AS1	94.8864154922121	-0.5975541001511	0.247860159591639	-2.41085175259953	0.0159153160688286	0.246228787995828
MAP1S	3536.89167205851	0.37709439166905	0.156440587246417	2.41046392311907	0.0159322469430388	0.246334721880693
XRCC6P2	12.7424895615013	-0.615430054288893	0.255364586487167	-2.41000548570512	0.0159522806620585	0.246488465713743
HSPB9	12.3151905421683	0.789705426932861	0.327725880018003	2.40965231946125	0.0159677291309005	0.246571210454341
SQLE	1964.94937583672	-0.824744309971354	0.342366813522721	-2.40894934145426	0.0159985184887921	0.246818240265493
RP11.734J24.1	19.345803498354	1.0418254885823	0.432551915043298	2.40855594981706	0.0160157712063798	0.246818240265493
SNAI3	76.1629135080999	0.816908923986574	0.339195852977481	2.40836943263221	0.0160239568821184	0.246818240265493
KTN1	7433.23107259825	-0.465387904337546	0.193238091495837	-2.40836524897872	0.0160241405321983	0.246818240265493
NPIPA1	220.271153205141	0.778972136006184	0.323498411893885	2.40796278240063	0.016041816284504	0.246934801521202
PRR33	360.892256556596	1.14921990568694	0.477371620524247	2.40739050307362	0.0160669794820173	0.247166399097104
FSD1L	290.90445698039	-0.584520602065338	0.242826396801294	-2.40715428703435	0.0160773760450453	0.247170685591197
RP11.274E7.2	47.4231686007112	0.956534116630129	0.397578414761011	2.40590052456724	0.0161326568735526	0.247861375206611
FAM46C	404.284447012171	1.09992905179434	0.457280611808082	2.4053699706297	0.0161561002935217	0.247861375206611
RPGRIP1L	460.937098528415	-0.46421750643691	0.192993439511731	-2.40535381726638	0.0161568145265567	0.247861375206611
ZNF675	265.169333618835	-0.538572828233222	0.22391864845452	-2.40521650139654	0.0161628871711544	0.247861375206611
LHFP	2801.37052063034	-0.768592426445331	0.319645784517442	-2.40451294424435	0.0161940326997771	0.248183202523748
RP11.408H1.3	3.8714077429186	1.6421280857995	0.683124276684516	2.40384969740708	0.016223442032036	0.248379031904014
AC025165.8	25.4446970060668	-1.27522304673517	0.530546171798407	-2.40360427521796	0.0162343363013	0.248379031904014
TM4SF19.AS1	48.9083246101433	1.3938891050899	0.57993239200014	2.40353724730306	0.0162373127819686	0.248379031904014
MAB21L2	12.2181103994983	-2.77945863676223	1.15682988049473	-2.40265114484557	0.0162767066641787	0.248531774476033
SRCIN1	58.0412445733792	1.22421568881843	0.509537660084557	2.40260099442949	0.0162789387342629	0.248531774476033
LAMC3	835.699224913442	1.52795566087144	0.635996692568759	2.40245850131721	0.0162852822155734	0.248531774476033
CYSTM1	1756.85200500116	0.724733701474348	0.301671002096799	2.40239763330583	0.0162879925881587	0.248531774476033
NDUFB7	5300.77028876637	0.576882286156015	0.240174103010201	2.40193375940916	0.0163086613075042	0.248599458715385
VPS25	2729.37903895915	0.485754586138257	0.202243870955408	2.40182599276573	0.016313466337863	0.248599458715385
TCEANC	220.157794147724	0.547088995890774	0.227800627797332	2.40161320528714	0.0163229576232952	0.248599458715385
LHX5	2.77475367403626	1.99240004170477	0.829817221269668	2.40101071734362	0.016349857637269	NA
ATAD2	2307.74339670751	-0.671769917973073	0.279820964621285	-2.40071332354336	0.016363150092942	0.248896986773568
MCOLN1	2794.70454122115	0.490011709117292	0.204138483393086	2.40038870169194	0.0163776703840357	0.248896986773568
SLC25A34	91.5119285690162	0.668110280655029	0.278342648878165	2.40031588169397	0.0163809291666717	0.248896986773568
TNFSF11	138.156759316617	2.11994595999484	0.883213632589884	2.40026408308308	0.0163832475636292	0.248896986773568
RP11.872D17.8	17.8048233640561	1.0170400850128	0.423779411566847	2.39992802211055	0.0163982959497098	0.248970771756035
RP4.655J12.4	5.94813564434463	1.21435665225462	0.506460446479078	2.39773246005063	0.0164969096002862	0.250312425233162
RP11.474G23.3	13.7049530478722	0.79555662713141	0.331871846940455	2.39718022021358	0.0165217952842169	0.250534411544466
KRT18P48	2.44695349117678	2.18943763769398	0.913829944286618	2.39589176452646	0.0165799854421376	NA
GJB2	1174.14796295758	1.95895941663042	0.817871492660849	2.39519219609572	0.0166116551827965	0.251740771997851
RIMBP3C	5.8379852085739	1.28788860095935	0.537942382688901	2.39410138037804	0.0166611428416331	0.252334196204746
DENND2D	798.390412544815	1.1340364928097	0.473855981590168	2.39320919618676	0.0167017152641872	0.252699692052615
SLC6A16	46.2774729171232	1.0718644278882	0.447894914524822	2.3931158696574	0.0167059643319405	0.252699692052615
CCDC154	49.5827850221182	1.06934706912704	0.44695183142126	2.39253314104705	0.0167325168803952	0.252802864918566
WARS2.IT1	18.9587827705988	1.22461459781752	0.511859007264981	2.39248422013907	0.016734747690122	0.252802864918566
ZNF749	104.467247027343	-0.60634383826184	0.253504590818433	-2.39184559263512	0.0167638932798746	0.252802864918566
URB2	512.34937014129	-0.485308822696887	0.202930549133736	-2.39150204229259	0.0167795906078388	0.252802864918566
RP11.738E22.3	16.6235080883293	0.835580297425777	0.349420577683632	2.39133110867419	0.0167874056262439	0.252802864918566
RP11.260E18.1	4.41203751756523	1.7680393359299	0.739367930028572	2.39128485848929	0.0167895207158392	0.252802864918566
C16orf89	91.0601781976434	1.43057392016201	0.598271519706215	2.39117837476954	0.0167943912637332	0.252802864918566
AC005083.1	11.9354310792899	-1.41153355021962	0.590459314823862	-2.39056868912415	0.0168223020742204	0.252802864918566
CDH3	214.455277840485	1.67385107714051	0.700237848431764	2.39040360484544	0.016829866472218	0.252802864918566
FIBIN	3187.57341636163	-1.03720653645491	0.433940796690801	-2.39020286722191	0.0168390685800957	0.252802864918566
RABAC1	11106.40494142	0.782876757313483	0.327551228537118	2.39008951610379	0.0168442667128862	0.252802864918566
AC009506.1	100.422700975945	0.488584675883644	0.204430441544358	2.38998004501022	0.016849288249837	0.252802864918566
LGI1	17.4177068387831	2.81405933330674	1.17764515260541	2.38956474034724	0.0168683505965938	0.252802864918566
ATP8B1	679.76805537844	-0.73818687294045	0.308934204897404	-2.38946306766387	0.0168730202225226	0.252802864918566
RP1.159M24.1	3.20325753916173	-0.899907172429375	0.376635360221069	-2.3893326741843	0.0168790105986506	0.252802864918566
VPS13B	1824.0326727215	-0.608095294336937	0.254513338261031	-2.38924725317645	0.016882935916967	0.252802864918566
RP11.98D18.9	12.2546022037687	0.964158973231818	0.403562109527103	2.38912165059705	0.0168887091386098	0.252802864918566
ARL6IP4	163.336626332186	0.651707023517733	0.272904068067695	2.38804437080093	0.0169382966448124	0.253389864504668
SSBP3	3581.45387768955	0.609067285923131	0.25515359904422	2.38706131602547	0.0169836584015712	0.253912968844543
CTD.2541M15.1	38.681604322449	-0.805206631850253	0.337407254825478	-2.38645322628508	0.0170117712315332	0.253954797787034
CA4	108.411753509066	1.68714326080526	0.707009945546237	2.38630767704657	0.0170185062278286	0.253954797787034
OR7E29P	5.61646384461336	1.66129435042601	0.696246244877856	2.38607297726605	0.017029371413333	0.253954797787034
ATG9B	91.6800913907638	0.885916956003084	0.371312273300654	2.38590808789601	0.0170370084373924	0.253954797787034
ZDHHC11	62.9126769923454	1.28704895834492	0.539444737646929	2.38587730776475	0.0170384343842543	0.253954797787034
FAM81B	2.70334247280348	1.76772419268691	0.740969331063384	2.38569144305878	0.0170470471382973	NA
MASP1	347.80174591819	1.82758801990589	0.766208296210047	2.38523653286687	0.0170681432656935	0.254242482827821
YTHDF3	2753.65489762112	-0.350470422844541	0.146948919507588	-2.38498128478204	0.0170799902383215	0.254263913182179
NAA25	1032.12219784081	-0.464674512903828	0.194941863059207	-2.38365687909066	0.0171415765326128	0.255025318584164
MAL2	12.7702019566818	1.4612213531337	0.613123962572748	2.38323967473433	0.0171610172947302	0.255148483225766
RN7SL832P	23.1901280694002	0.894256159508471	0.375309616757295	2.38271581537109	0.0171854553239037	0.255148483225766
TMSB10P1	12.8453234666024	1.06959123036516	0.448922700779712	2.3825732771086	0.0171921100121578	0.255148483225766
SNAPIN	1658.37224754537	0.328731772389908	0.137983414589254	2.38240061944016	0.0172001739133857	0.255148483225766
UBA5	1393.74676389666	-0.370667075927877	0.155588196563965	-2.38235987120969	0.0172020775255981	0.255148483225766
LRRC45	1517.53741674002	0.485106417686685	0.203654569168408	2.3820060589239	0.0172186141459777	0.255213747926954
RP11.428O18.6	6.65057919765964	1.12324282122816	0.471667918325488	2.3814272236617	0.0172456980485056	0.255213747926954
LGALS9C	12.1161745123246	1.94125084712152	0.815178083517241	2.38138253023882	0.0172477908223938	0.255213747926954
DIAPH3	749.171391382295	-0.867457126906228	0.364267737193767	-2.38137237623325	0.0172482663157477	0.255213747926954
PTPN14	2486.85991800319	-0.801400216454169	0.336591854189218	-2.38092576062062	0.0172691918791487	0.255283776898478
DYNLT1	3965.73262232532	0.391707014380558	0.164525723450102	2.38082535767943	0.0172738991859341	0.255283776898478
RP11.313M3.1	2.76644434575132	1.83510920600467	0.770856589764857	2.38061038897579	0.017283981595852	NA
NAA20	2197.09195962645	-0.414656032821366	0.174246203305519	-2.37971344543054	0.0173261055411312	0.255889848332532
ABCB8	2308.11267398299	0.494521185426645	0.207825144131559	2.3795060385648	0.0173358589786868	0.255889848332532
NFATC1	1652.95877011061	0.896931012531124	0.377068403781013	2.37869575795067	0.0173740090969499	0.256167761307325
ENSG00000224958	3.11836841112498	1.8632613218108	0.783392648699329	2.37845137416643	0.0173855297625362	0.256167761307325
RP11.554D14.8	6.01866553377928	1.489337942434	0.626204106968013	2.3783586307748	0.0173899035963208	0.256167761307325
MAPK3	3658.90590841444	0.470236147028478	0.197726424207586	2.37821600685397	0.017396631708578	0.256167761307325
MORN5	3.05496144729684	1.79266880847669	0.753915560305407	2.37781112748288	0.0174157438458003	NA
CCDC138	217.854079436725	-0.549415626646369	0.231090041789571	-2.37749589896506	0.017430636802275	0.25651387135107
RP11.1094M14.8	79.3109118649855	1.7313634693037	0.728458708730886	2.37674894754168	0.0174659710753652	0.256879113425706
DPRXP4	6.75384607384991	1.02221370219305	0.430142368125729	2.37645435079359	0.0174799241296621	0.256929642938336
HSD17B10	5647.73146182731	0.516996460675692	0.21760940245347	2.37580019450785	0.0175109420345321	0.256970928456704
AC144831.1	515.306154753499	1.1149878499459	0.469348335658641	2.37560840261898	0.0175200453079895	0.256970928456704
INSL3	24.2141109147446	1.50479109889747	0.633456955258451	2.37552226146686	0.0175241352900336	0.256970928456704
RP11.576I22.2	100.822608901084	1.14576535157443	0.482324336180977	2.37550806713704	0.0175248093171586	0.256970928456704
KLHL34	6.87114384990399	1.82072503661602	0.766611789212495	2.37502874627896	0.0175475835307447	0.257150520739389
SLC14A2	9.81728290276474	1.12935460013301	0.475593841168097	2.37461990121491	0.0175670296915583	0.257281156076185
RP11.484K9.4	3.48860921550601	1.20865943094799	0.509112344769608	2.37405249227448	0.0175940490287264	0.257522482757794
RP11.763B22.3	1.92412640415838	1.43112315838913	0.602860070540861	2.37388944519943	0.0176018198708149	NA
SH3BP2	3258.75677119109	0.613877297945636	0.258630808995503	2.37356601222366	0.0176172436266931	0.257707571590711
HSPB3	27.1209732797646	-2.04335028581178	0.86114095593074	-2.37284067345662	0.0176518764023245	0.257819394296071
PHKG2	1413.77514107064	0.536850086807727	0.226276901579	2.37253596395165	0.0176664431680887	0.257819394296071
LYSMD4	602.015124861413	0.615951857365443	0.259657785636665	2.3721678741701	0.0176840539045026	0.257819394296071
GATA4	6.51402810138199	2.09328199082399	0.882446184157566	2.37213557994174	0.0176855997102054	0.257819394296071
CDH7	8.38390485740669	2.39750835464888	1.01072600342839	2.37206557119982	0.0176889511773277	0.257819394296071
STX2	1610.00195249239	-0.42903493624188	0.180873550971564	-2.37201588588998	0.0176913300562879	0.257819394296071
TOB1.AS1	45.3375522413963	0.687895041267637	0.29002338037378	2.37186064234229	0.017698764756417	0.257819394296071
RP11.424C20.2	58.6298235786726	-1.03118061340394	0.434896568164791	-2.37109393103604	0.0177355231588468	0.257957803366569
ID2	2626.8695800209	0.698677502398548	0.294671909205629	2.37103531273826	0.0177383362440667	0.257957803366569
MS4A1	31.6441322292754	1.88737342089743	0.796023613909444	2.37100179934127	0.0177399447237233	0.257957803366569
GALR1	23.9766060293573	2.00643849197747	0.846387953139596	2.37058961500429	0.0177597380179838	0.258091992885976
AL356585.3	2.13047028801458	-1.03071922500784	0.434881374951424	-2.3701158163487	0.0177825139677957	NA
AK1	1174.75395452661	0.770482410182087	0.325125739595271	2.36979825448829	0.0177977937896846	0.258491263072655
DOCK9	2064.37627752092	-0.868230295197168	0.366451041847503	-2.36929411039436	0.0178220748410927	0.25869011663283
DKFZp779M0652	8.02071853091985	1.34314629659752	0.566965540332171	2.36900869814875	0.017835833991484	0.258736097730382
CTD.2020K17.4	3.06847821090143	1.71939036587992	0.725814474566418	2.36891165184744	0.0178405145183956	NA
KCNA4	3.36817849506587	2.93574213072596	1.23969399808242	2.36811837055518	0.0178788147126061	0.259141873857074
LRRCC1	699.874907985001	-0.737288527064844	0.311356274146192	-2.36798994684354	0.0178850218724887	0.259141873857074
CYP24A1	31.050408761932	1.892179873687	0.799268239754335	2.36739029473832	0.0179140301182084	0.259408323507832
AP001434.2	44.5813522324948	1.86629281598166	0.788413102985218	2.36715093764322	0.0179256205525457	0.259415699606494
CACNG4	561.505226038491	2.35062879240025	0.993108195734672	2.3669412884679	0.0179357778310765	0.259415699606494
NOL4	1.48455708721715	2.44256616182829	1.03195498680797	2.36693091564351	0.0179362805142093	NA
RP11.415J8.3	76.7944118670602	-0.721479833648367	0.304881506130386	-2.36642701882947	0.0179607150013583	0.259622666726735
CCDC23	1069.40804301134	0.545925639507276	0.230867295553392	2.36467290959806	0.0180460011763776	0.260603280177288
NOC3L	802.455446869447	-0.357868298828057	0.151344557841203	-2.36459311079786	0.0180498894780781	0.260603280177288
POLR3GL	1793.38154549794	0.397729153290858	0.168269028594163	2.36365037947723	0.0180958808736686	0.261073562638862
CRYGS	112.999893927855	0.886239107641987	0.374970926971936	2.36348752368291	0.0181038362237599	0.261073562638862
PHLDB3	580.847689405047	0.644258310214043	0.272665214213153	2.36281812505206	0.0181365678849219	0.26122668641269
BBS9	1121.19598581687	-0.478242433069363	0.202413260478805	-2.3627030755697	0.0181421986883676	0.26122668641269
DSG3	15.553118531078	2.98376354271757	1.26290748208252	2.36261451060325	0.0181465343175052	0.26122668641269
CTSW	870.833793586137	1.55528309072057	0.658375758038576	2.36230309474645	0.0181617866439901	0.261292276752671
RP5.1057I20.4	5.70287627301519	0.992002878605769	0.420017987148924	2.36181046754561	0.0181859371486811	0.261485731962996
ZNF280B	98.2129998714082	1.54409943578556	0.653879102005001	2.36144484668628	0.0182038794830748	0.261589748171784
MAP3K9	133.459701615018	-1.29093524482501	0.546799084127223	-2.36089503859639	0.0182308897282732	0.261716453211767
AGR2	30.8221251695705	2.39619739440947	1.01512338596159	2.36049866208101	0.0182503841512534	0.261716453211767
CLEC4F	12.8835287210929	1.54380050090193	0.654037342654835	2.36041644753098	0.0182544298772269	0.261716453211767
TRGV2	8.12609190980296	2.046131210373	0.866860144833641	2.36039368353436	0.0182555502178907	0.261716453211767
PTCH1	560.585191995898	0.937317451494695	0.397183898445365	2.35990798006538	0.0182794686889806	0.261905654312673
PCDHGA4	82.4983289659498	-1.11717151659608	0.473457040641173	-2.35960482303349	0.0182944115618623	0.261966107880853
ZNF358	6795.80885783108	0.564589853872398	0.239301013541047	2.35932913746541	0.0183080096256844	0.262007244959487
KIAA0196	2520.37430550882	-0.446506045395347	0.189300908582039	-2.35871052463459	0.0183385546267271	0.262181780564072
RP11.423E7.2	4.47310715348971	-1.09006764858003	0.462157935753173	-2.3586474757889	0.0183416702682877	0.262181780564072
SEPT1	797.391762285489	1.20288651658698	0.510162301161338	2.35785065624944	0.0183810861044154	0.262326187704352
UNC119	1175.13381600266	0.420904276549867	0.178524594389576	2.3576823013605	0.0183894235047219	0.262326187704352
AC109309.4	6.92474343159922	2.46943959333365	1.04743078492139	2.35761601518995	0.0183927070875697	0.262326187704352
FUNDC1	909.745762351614	0.455140485341555	0.193078224241862	2.35728543251681	0.0184090906490617	0.262326187704352
NAA38	2745.08535375703	0.724366159352427	0.307295210741068	2.35723217945882	0.0184117310462042	0.262326187704352
RMDN1	1515.21206368972	-0.352775449629798	0.149662365690022	-2.35714201097463	0.0184162025425914	0.262326187704352
SCARA5	7115.14090064914	2.05965560474021	0.874005558683858	2.35657037220883	0.0184445724906794	0.262577191943361
LRRTM3	2.72418250964288	-2.53955985568488	1.07808628902143	-2.35561835963057	0.0184919049704534	NA
GLUD1P7	14.6619507227825	1.11540887544096	0.473529724886882	2.35552029116526	0.0184967868050255	0.263167154839818
CTD.3222D19.12	77.1540439317594	0.638189732629983	0.270970223986073	2.35520243974402	0.0185126171573494	0.263239071325314
RP5.839B4.8	1.94452737267551	2.43238780941839	1.03282235149017	2.35508827428928	0.0185183059758235	NA
ZC3H12A	466.204336445495	0.859219781260018	0.364901057028959	2.35466509265779	0.0185394062927346	0.263444481312614
PSMD4	10281.0519175987	0.391415495164776	0.166242847351958	2.35448021613885	0.0185486310474312	0.263444481312614
PTH2R	163.006625416012	2.04686809228998	0.869994558408838	2.35273666082874	0.0186358266997308	0.264529117052716
WHSC1L1	3865.24721058654	-0.539656347986989	0.22952871557923	-2.35114960071612	0.0187155075652538	0.265505885198366
INO80C	686.567376723597	0.53828656516962	0.229037149989552	2.35021508604248	0.0187625656366756	0.265802130839202
FCRL2	9.6108155652521	2.0447714242913	0.870126066634365	2.34997146126244	0.0187748505102649	0.265802130839202
RP11.344P13.6	15.1504984251052	1.14701197441259	0.488102254657079	2.34994197111102	0.0187763380398108	0.265802130839202
FUK	554.397594200769	0.42265406577227	0.179863050480308	2.3498659932855	0.0187801709555912	0.265802130839202
ANKRD35	417.835279882431	1.18060401277582	0.502460981899596	2.34964316694293	0.0187914160063414	0.265802130839202
TRAM1	9852.10743432033	-0.402595747072205	0.171365241477588	-2.34934309665627	0.0188065685196358	0.265802130839202
RP1.102E24.10	22.2812488834021	0.949531859300604	0.404207996575875	2.34911695796292	0.0188179948033985	0.265802130839202
NLK	705.991086969809	0.470523141962572	0.20030705465234	2.34900933858385	0.018823434702682	0.265802130839202
CTA.126B4.7	8.73876270841624	1.83267489230497	0.780311332229598	2.34864574767668	0.0188418235179283	0.265908091692358
COPS5	2666.14481146902	-0.379679904463798	0.161694586308992	-2.34812997225674	0.0188679361024853	0.26612287011987
AL513327.1	3.46709680153918	-1.03329222452396	0.440280990318361	-2.34689266001877	0.0189307075932343	0.266854157989106
CTB.193M12.4	5.61121083388997	1.24580974082105	0.530913574361546	2.34653962713085	0.0189486511583449	0.266953056024919
RP1.161P9.5	1.63065522411214	2.29906081034949	0.979870909891798	2.34628948276805	0.0189613742200582	NA
FBXO16	28.2853851308089	1.40059690468315	0.597019553241535	2.34598163004639	0.0189770427483451	0.267165695555769
GRIP2	103.887237156994	1.46344405155964	0.623857342392281	2.34579919496953	0.0189863333387763	0.267165695555769
PPM1L	621.434632675037	0.952095708378546	0.405939761927919	2.34541130895082	0.0190060998312889	0.267165695555769
SEMA3B.AS1	15.0606175610313	1.4425473104163	0.61505804045335	2.34538403782677	0.0190074902319345	0.267165695555769
AC015849.15	1.69922090583989	2.23941697878502	0.954967644665851	2.34501869387272	0.0190261256356843	NA
GSTT2	6.91475732380788	-1.69119806868534	0.721241437421748	-2.34484318417829	0.0190350836839794	0.267170615848042
CYP2E1	82.0357306815396	1.18966484127669	0.507367426443327	2.34477969864228	0.0190383249059197	0.267170615848042
FAP	3422.88300492963	-1.15946453244247	0.494516802233001	-2.34464132908504	0.0190453909657122	0.267170615848042
RP11.227G15.11	4.14877409039708	1.27562744322988	0.544162377725034	2.34420367053463	0.019067755788104	0.267170615848042
PVRL3	546.121243740483	-0.775194483870382	0.330689450433723	-2.34417663718531	0.0190691379739227	0.267170615848042
BATF	508.49633098787	1.23062384643093	0.525093076272238	2.34362992398876	0.0190971096310793	0.267170615848042
RNF219	421.23964690324	-0.471098198603139	0.20101642244489	-2.34358065312945	0.0190996322524591	0.267170615848042
NR4A2	534.019639500568	-0.982453047032215	0.419283204775857	-2.34317290996052	0.0191205194997779	0.267170615848042
SPNS3	59.1666281280154	1.42632206506949	0.608722636967341	2.34313951617675	0.0191222310301008	0.267170615848042
ZWILCH	1557.20201321904	-0.609872705975478	0.260286138578275	-2.34308561073095	0.0191249941264417	0.267170615848042
RP11.251G23.2	7.93215915339893	0.965278463236634	0.411987128840465	2.34298208770115	0.019130301509803	0.267170615848042
CHRNA10	31.538718169372	0.636323375450673	0.271690995125491	2.34208489374762	0.0191763525008526	0.267170615848042
SAMD4A	1746.69963792079	-0.530532267749735	0.226532443967736	-2.34197035293231	0.0191822385981541	0.267170615848042
RPL21P75	28.1649131154872	0.984584060785685	0.420414424925621	2.34193691370099	0.0191839572927355	0.267170615848042
TMEM130	36.0112953581335	1.62609288488967	0.694417796582026	2.34166361071594	0.0191980094432047	0.267170615848042
CHST13	70.3125195229736	1.12906948182251	0.482276542920594	2.34112460661064	0.0192257492570167	0.267170615848042
SYT8	6.66004333734116	2.37234886845319	1.01335422063727	2.34108549620615	0.019227763434163	0.267170615848042
RTN4R	120.796813299533	1.2134533166575	0.518369898145774	2.34090235755984	0.0192371974877668	0.267170615848042
NWD1	4.76211714646299	1.40472302504768	0.600111153516035	2.34077140012721	0.0192439460017672	0.267170615848042
PRF1	1349.53163454277	1.33425658407237	0.570018976538387	2.340723096931	0.0192464356901113	0.267170615848042
RP11.490B18.5	11.1671032801882	0.838971851617324	0.358432218644599	2.34067086600047	0.019249128142176	0.267170615848042
RP11.64C12.3	3.74861778443283	1.98457174981854	0.847965571324478	2.34039189435337	0.0192635144260575	0.267170615848042
RP3.395M20.9	11.5837852873292	0.883732450268537	0.377607847324492	2.34034450430558	0.0192659592160778	0.267170615848042
PPM1E	83.6352510917161	1.43377671313089	0.612657016752861	2.34026000506782	0.0192703190930554	0.267170615848042
KIAA1524	675.268357137472	-0.672808587058866	0.287545151754892	-2.33983631075922	0.0192921933008195	0.267243637267118
PRKG2	92.9222268641349	1.7257349599272	0.737674143972553	2.33942720377009	0.0193133349926634	0.267243637267118
RP11.434D12.1	11.3591717711795	-0.780064666187383	0.333451019778473	-2.33936806282859	0.0193163929325172	0.267243637267118
ZNF7	966.119651345013	-0.434665273961875	0.185823397127789	-2.33913102806403	0.019328653292055	0.267243637267118
SNORD100	8.26103756709534	-0.58418569815119	0.249748116871825	-2.33909951141295	0.0193302839678659	0.267243637267118
ZBED6	91.1709331204248	-1.33863866459056	0.572381302818904	-2.33871836483466	0.0193500140638531	0.267299271575088
CCT6P1	174.264156645793	-0.484288982427595	0.20709402106337	-2.33849813693754	0.0193614222055795	0.267299271575088
RP11.365O16.6	14.2463983481791	0.887939554275124	0.379743628889982	2.33826057035015	0.0193737351070073	0.267299271575088
RP11.399E6.1	3.94224507406858	-1.12143345841744	0.47965426086261	-2.33800374544917	0.0193870538487814	0.267299271575088
GDA	7.64686446143496	1.62867081126525	0.696618721520754	2.33796589289156	0.0193890175296188	0.267299271575088
LINC00844	7.32013147079119	2.32015913371091	0.992558766602849	2.33755341424461	0.0194104269925973	0.267368237460892
PIGS	2303.02346362619	0.3709183195421	0.158691918414344	2.33734851307068	0.0194210699450963	0.267368237460892
DNAH10	97.1131707587487	-1.16634270547505	0.499073518072148	-2.33701581678882	0.0194383616765954	0.267368237460892
ACTN4P1	2.72753966418402	-1.01693838587638	0.435153128606874	-2.33696673428976	0.0194409138544962	NA
RNF175	104.630163480059	0.944461728071134	0.404141759733005	2.33695653895081	0.0194414440255676	0.267368237460892
PLD3	24345.1821083033	0.602141729446895	0.257685229180591	2.33673358524133	0.0194530410714874	0.267368237460892
GP6	6.63383851518662	1.34517493762761	0.575726647401779	2.33648198098577	0.0194661356479202	0.267368237460892
FAM3B	49.2540895631051	1.52389062575563	0.65225173649746	2.336353497407	0.0194728254603002	0.267368237460892
SPSB1	4023.18795601826	0.630967890301424	0.270101033723494	2.33604396696739	0.0194889501697714	0.267368237460892
RABEP2	1880.81988315682	0.554021731426803	0.237169332270564	2.33597542364698	0.0194925224494596	0.267368237460892
MGAT1	14376.8861630153	0.356624092334302	0.152691916465243	2.33557938488171	0.0195131740481305	0.26748054608172
MRVI1	586.192444638961	1.01142396606458	0.433100241060606	2.33531148259751	0.0195271547546937	0.26748054608172
BMP2	478.740496241266	1.2855460709061	0.550510542296175	2.33518883315857	0.0195335582385603	0.26748054608172
COPE	10474.2339545184	0.505144122972542	0.21638183455002	2.33450337466184	0.0195693795684399	0.267820937522363
RUNDC3A	116.276310465797	1.33820486944571	0.573389645056337	2.33384903439306	0.0196036282118219	0.26805087049971
PSD3	2970.16030153076	-0.832176673808913	0.35658145660201	-2.33376317921582	0.0196081258169791	0.26805087049971
ST3GAL5.AS1	6.51156607103284	0.952519716617115	0.408259013027439	2.33312599654253	0.0196415334125324	0.268178149938655
EDARADD	83.3420472528349	1.43903085108405	0.616833683332961	2.33293169612347	0.0196517305023602	0.268178149938655
NUDT18	623.571028029446	0.801253130498997	0.343464665599142	2.33285461577623	0.0196557770405937	0.268178149938655
XIRP1	199.263342932048	1.65626364272104	0.710026627679798	2.33267820973605	0.0196650406843848	0.268178149938655
OR2B6	15.0017567712458	1.32966467623757	0.570050220926694	2.33253953322923	0.0196723257067448	0.268178149938655
GDAP1L1	15.3933667194269	1.42578451916335	0.611444304148921	2.33183056819529	0.0197096062436931	0.26842924510197
RP11.104L21.2	4.7885481667507	1.30747327542955	0.560721039886502	2.33177138438429	0.0197127211802748	0.26842924510197
LINC00899	214.202425760934	-0.640923241969704	0.274957907651245	-2.33098675882655	0.0197540578991087	0.268567182743102
RRS1	1260.94024540769	-0.68595519494905	0.294277089599736	-2.33098402557283	0.0197542020283221	0.268567182743102
APLP1	690.540812246311	1.1843238118073	0.508144941898884	2.33068109933675	0.0197701815463323	0.268567182743102
CTD.2521M24.5	5.26326982321743	1.83069975556546	0.785549145539886	2.33047132182579	0.0197812540337035	0.268567182743102
CLCNKA	11.2014584644043	1.67736803166168	0.719789498538941	2.33035913286658	0.0197871778190976	0.268567182743102
TFB2M	582.385559818384	-0.43287088383134	0.185755333420683	-2.33032815725948	0.0197888136615328	0.268567182743102
ZNF785	471.638961301474	0.393075950715995	0.16872559214835	2.3296759294843	0.0198232856757987	0.268885644516428
TRIM29	99.9300670786594	1.63238806322903	0.700976618387624	2.32873396973472	0.0198731633507706	0.269307188478744
ZRANB2	3056.91513921144	-0.328388796502677	0.141029591881522	-2.32850986889726	0.0198850458272829	0.269307188478744
EAF1.AS1	5.66114609249173	-0.761131557319247	0.326881279973175	-2.32846480955321	0.01988743575323	0.269307188478744
KIF25.AS1	7.65269614933582	2.46719926853897	1.05982067098678	2.32794031677247	0.0199152730511735	0.269534739815577
RP11.192H23.8	17.9634755805412	0.724536480956488	0.311298485368933	2.32746548733705	0.0199405038126847	0.269709379051909
BEX2	151.268247770605	1.66723885859222	0.716388823309722	2.32728206295788	0.0199502578061648	0.269709379051909
XCR1	122.084197215971	1.84865610764198	0.794564638869341	2.32662771184054	0.0199850883008167	0.269874198027097
PENK	52.8005859278262	1.81705144893574	0.781006014433134	2.32655244051429	0.0199890983248154	0.269874198027097
MYH8	63.9381242249121	-1.89935154284775	0.816423043081183	-2.32643059127728	0.0199955912411087	0.269874198027097
RP11.334J6.6	7.5621960234957	1.00107352784147	0.430387036014576	2.32598439096007	0.0200193833991186	0.270046116541727
FBXL16	48.9917282387009	1.18041960404679	0.507586885107384	2.32555181916699	0.0200424724461504	0.270066237199667
NR2F2.AS1	42.9700381875356	-0.968522437424751	0.416471664493079	-2.3255422157078	0.0200429853061114	0.270066237199667
SEPT10	2525.16787814568	-0.483405936009324	0.207916533517906	-2.3249999787424	0.0200719613372268	0.270307576354527
RP11.889L3.4	11.9159922925186	0.759888888970512	0.326874161278959	2.32471384705753	0.0200872663586343	0.270364644559272
KRTAP5.9	4.23177488260375	1.21158243087905	0.52134772623761	2.32394306123214	0.0201285459376086	0.270771062064891
RP11.843A23.1	16.5049836521559	2.12662685899801	0.915722197302171	2.32234936016983	0.0202141317269476	0.271538715143131
ACTN4	25461.9507980006	-0.561749557884996	0.241896834426068	-2.32226915750188	0.0202184471928101	0.271538715143131
C5orf30	454.3795166136	-0.621649993577965	0.267695884006936	-2.32222469868778	0.0202208397350159	0.271538715143131
RTP4	360.552854002335	1.02738358208524	0.442446193527953	2.32205316061857	0.0202300733374473	0.271538715143131
RP1.78B3.1	5.40585679065798	-0.92038562691696	0.396613032611045	-2.32061367438618	0.0203077035085503	0.271931636091938
ADCY9	2119.28150896079	0.538736271629468	0.232164799558065	2.32049075766427	0.0203143443217435	0.271931636091938
HLA.DPA3	4.16814956408368	1.56363270614991	0.673901795766538	2.32026790249362	0.0203263893338383	0.271931636091938
GLG1	14912.1543231055	0.422892842835829	0.182294737954927	2.31983022428431	0.020350063367289	0.271931636091938
NPC2	15570.0727279418	0.714287039408594	0.30790801101422	2.3198066106036	0.020351341315891	0.271931636091938
GUCY2D	6.28457764188175	1.48538773585019	0.640320331066493	2.31975725864612	0.0203540124201471	0.271931636091938
AQP7	34.9669223265116	1.55515393505531	0.6704653093543	2.31951439300121	0.0203671616325659	0.271931636091938
RP11.353N4.6	32.2274047967055	0.871231945294384	0.37565478948369	2.31923555797552	0.0203822674332941	0.271931636091938
DHRS2	322.688728251957	1.55607815681839	0.670978153603436	2.31911895858545	0.0203885870661568	0.271931636091938
RP11.288L9.4	8.55922411579738	1.33712372369917	0.576602348941139	2.31897030276523	0.0203966466212403	0.271931636091938
TNNC2	219.268975326166	-1.47927466098279	0.637935736067742	-2.31884589206601	0.0204033938337038	0.271931636091938
ATP2B1	5857.93154609531	-0.619676009113923	0.267246330501633	-2.31874468753514	0.0204088839331997	0.271931636091938
VAC14	3386.22917250252	0.451226681561948	0.194608615192465	2.31863672179	0.0204147422326178	0.271931636091938
ARHGEF28	386.472863678524	-1.18217143491243	0.509858059761384	-2.31862851293494	0.0204151877110243	0.271931636091938
MCF2L2	53.5485941660761	1.04811197597989	0.452189654972578	2.31785925320084	0.0204569715681868	0.272339704871519
RPLP0P2	1276.94713397773	1.51662707652756	0.654396292037641	2.31759729537148	0.0204712173381408	0.272380919582484
NPR1	3484.93796824394	1.32261665336069	0.570805366681668	2.31710619864984	0.0204979474370131	0.272588109928576
TSEN54	1312.89002186512	0.419413175997194	0.181042458494859	2.31665643233134	0.0205224546461512	0.272627364740978
RBM44	31.5604918681736	-0.920011282335297	0.397131330907038	-2.3166424070194	0.0205232192786712	0.272627364740978
RNU4ATAC	6.853937018382	1.56218572923623	0.674422648479873	2.31633046837521	0.0205402319845967	0.272693792497964
LINC00643	2.82621718205643	2.39565769907345	1.03450867561908	2.31574442586459	0.0205722271980565	NA
LINC01260	78.2722557977754	1.5924649827799	0.687684771846675	2.31569033949025	0.0205751822535887	0.272693792497964
CEBPE	16.5766371774317	1.24378618843961	0.537122860843498	2.31564559826474	0.020577627008615	0.272693792497964
KCNC1	16.6364203668729	1.84915319847638	0.798565846489948	2.31559264224012	0.0205805209649433	0.272693792497964
OGG1	1222.19687276969	-0.442702025693982	0.191222423702759	-2.31511564973221	0.0206066037902136	0.272693792497964
DNAH12	13.6560778514199	1.19713923136665	0.51711788270608	2.31502191550989	0.0206117327366767	0.272693792497964
STARD7	6183.72260599316	0.290921778173281	0.125682081443652	2.31474347680749	0.0206269749024154	0.272693792497964
LL21NC02.1C16.2	25.3906498566266	1.42570974931128	0.615932882277393	2.31471608406383	0.0206284749544803	0.272693792497964
FRAT2	561.949216181991	0.567909580292074	0.245357657010839	2.3146193487941	0.0206337730287005	0.272693792497964
ABHD8	1298.8191649924	0.487444144039592	0.210603741415223	2.31450847342049	0.0206398469985974	0.272693792497964
KBTBD2	3015.15689283173	-0.291001176319507	0.125753193044962	-2.31406590380145	0.0206641073616983	0.272777465359805
ZBTB38	3254.77084968694	-0.532499077665279	0.230123777708049	-2.31396808695207	0.0206694727468748	0.272777465359805
TRAFD1	2986.6059944016	0.463554994786316	0.200360241857629	2.31360768228512	0.0206892519088581	0.272777465359805
KB.431C1.4	172.149522096221	-0.487143679736945	0.210558510610216	-2.31357867380978	0.0206908446236735	0.272777465359805
C11orf49	1575.25278297704	0.568184592002967	0.245689454876713	2.31261285629081	0.0207439340467641	0.272926792972506
GFRA2	214.330248066616	1.34768109982174	0.582795418493217	2.31244285225524	0.0207532911736769	0.272926792972506
RP11.818O24.3	2.44768738131179	-1.02714683218613	0.44421808927555	-2.3122580034083	0.0207634695433726	NA
LINC01535	44.2373980928924	-0.826557701151591	0.357473288292972	-2.31222227847742	0.0207654371742171	0.272926792972506
GPBAR1	112.014464200846	1.01267747865654	0.438034589843101	2.31186646474486	0.0207850432881489	0.272926792972506
KCNJ16	8.71795846252868	1.49210803228018	0.64545192780805	2.31172604495484	0.0207927851648434	0.272926792972506
IPO13	3080.79203424413	0.360363027815374	0.155892339565752	2.31161472602944	0.0207989243863725	0.272926792972506
TMEM37	771.544414501561	0.767649219195553	0.332091361167291	2.31156033838787	0.0208019244309252	0.272926792972506
SLC26A8	4.9620226095943	0.902569014085015	0.390476862843902	2.31145325106196	0.0208078325141418	0.272926792972506
RP11.480D4.6	5.09943692348638	1.12138146698271	0.485175262729726	2.31129151283088	0.0208167584990806	0.272926792972506
RP11.469A15.2	5.31472672190294	-1.65865145107262	0.717661696169602	-2.31118848884563	0.0208224459110496	0.272926792972506
MESTP1	3.20010992954825	-2.05927554608932	0.89109178570514	-2.31095783747998	0.0208351838696914	0.272926792972506
OAZ3	72.3251241207997	0.588537629323876	0.254674698747071	2.31093874742689	0.0208362384417587	0.272926792972506
ANKRD28	2706.09464251146	-0.63990103942032	0.276976195005217	-2.31031060054914	0.0208709644716795	0.273235150631649
ABAT	349.743371136752	0.814244200526268	0.352509731703786	2.30984885606074	0.0208965233870256	0.273285030004769
PASD1	2.57637237532198	2.58429069078661	1.11882081195155	2.30983430338488	0.0208973293636571	NA
NUDT14	542.76478646277	0.636668774565741	0.275660686538138	2.30961034945278	0.0209097361103687	0.273285030004769
BLOC1S1	2346.75934437027	0.599311517829512	0.259499148395658	2.30949319693236	0.0209162287594896	0.273285030004769
C6orf132	974.965140992022	1.32884791168288	0.575509807151963	2.30899264472829	0.0209439893985432	0.273285030004769
RIBC1	84.0369424308971	0.72105450366506	0.312283472727751	2.30897427060982	0.0209450090383284	0.273285030004769
GPR124	7586.15402956247	-0.943597030987752	0.40866612625949	-2.30896805571939	0.0209453539326666	0.273285030004769
MIB2	2850.74722782778	0.497240388161725	0.215381494689495	2.30864953778212	0.0209630366621365	0.273285030004769
ZNRF3	8.69359151251639	-1.04267567543661	0.451740412821832	-2.30813016910188	0.020991897651545	0.273285030004769
RP11.727F15.11	11.9728036911791	0.795731469563052	0.344766372490522	2.30803098287936	0.0209974133031395	0.273285030004769
ENO1.IT1	4.21760155026364	-1.02678730631572	0.444896661820459	-2.30792315256814	0.0210034110769933	0.273285030004769
CD300C	343.846825471614	0.960626139643171	0.41623040044566	2.30791921641145	0.0210036300434644	0.273285030004769
ACAD11	18.7450380796854	-0.611917501465174	0.265149305127405	-2.30782238396267	0.0210090174116401	0.273285030004769
RP3.324O17.8	2.33870379715117	1.71954488034304	0.745504004274324	2.30655351344069	0.021079723610897	NA
IGKV1.8	35.5553873107058	2.91132033148471	1.26231247473996	2.30633887388656	0.0210917046073105	0.274082469789213
NRG2	57.144948786687	1.30446964834765	0.565623180993844	2.30625209888957	0.0210965499973254	0.274082469789213
KCNA2	7.61999321399996	1.85147355192166	0.802852539005144	2.3061190716491	0.0211039799285075	0.274082469789213
RP11.472G21.2	3.06857813952487	1.35593350638454	0.588021356147074	2.30592561343197	0.021114789161644	NA
CAPN14	6.48186719724343	1.33611641501418	0.57973268515853	2.30471120435242	0.0211827529685756	0.274612649222949
RP11.1072A3.4	16.1064164605801	1.03755716372405	0.450225670201492	2.3045268903919	0.0211930846473814	0.274612649222949
SLC41A1	1679.30293880961	-0.391876497428544	0.170052312983792	-2.30444673496382	0.0211975791118181	0.274612649222949
SRFBP1	438.580094726298	-0.454241169553571	0.197121525383925	-2.30437121805377	0.0212018142454773	0.274612649222949
PCBP2.OT1	5.93617412099632	-1.06841254435809	0.46366716769564	-2.30426611758591	0.021207709708744	0.274612649222949
RAB3C	15.857662654721	1.39441745597982	0.605167269527329	2.30418518349306	0.0212122505662821	0.274612649222949
AC139100.3	22.3475032627891	1.51113724516775	0.655933151054177	2.30379763965144	0.0212340056930681	0.274748689129216
SNX13	1802.56412602803	-0.41215501339723	0.178980604135114	-2.30279149737415	0.0212905771556649	0.275334838187263
TNFAIP8L2	673.767177768725	1.06449279189476	0.462372382514449	2.30224129327512	0.02132156847441	0.27551274701672
RP11.131L12.3	12.52864452123	-0.875740207977051	0.3804369764463	-2.30193241508076	0.0213389838544916	0.27551274701672
RP6.109B7.4	19.5523288440562	-0.894631199024788	0.388652629162426	-2.30187867493083	0.0213420151329739	0.27551274701672
UPK2	7.50443997424071	1.28384491087233	0.557769787985744	2.30174695461481	0.0213494465636191	0.27551274701672
RP11.343H19.1	2.5622698298596	1.24843124587375	0.542384580288763	2.30174546114326	0.0213495308355994	NA
SPINK2	6.95152122391157	2.10259823542314	0.913626738909567	2.30137554635565	0.0213704129071651	0.275637706921402
OR2L13	5.02766106186137	1.89214953750906	0.822323104724173	2.30098063235586	0.0213927258385906	0.275779894201018
STARD8	842.585977724774	-0.673993458055582	0.292977468927583	-2.3004958726781	0.0214201428505305	0.275987694987136
C11orf96	1932.14921915601	1.02887189512312	0.447296984214113	2.3001985960867	0.0214369713349763	0.276004070967647
HTR2A	118.733649723959	-1.40733296898575	0.611864130198129	-2.30007431311595	0.0214440102622537	0.276004070967647
PDCD4	2774.82383233337	0.60278417802471	0.262126171203502	2.29959555452682	0.0214711441877417	0.276040830400256
VIPR1	38.8679723691326	1.42812568099657	0.621094919966634	2.29936783426483	0.0214840608558629	0.276040830400256
HIST2H2AC	59.1122910187796	0.851059444219393	0.370159727910034	2.29916811594977	0.02149539477579	0.276040830400256
MYC	4846.03363723157	-0.64596415951444	0.280983643235565	-2.29893865733989	0.021508422869542	0.276040830400256
KAT8	2031.2713707376	0.521004969862228	0.226637562838822	2.29884650777308	0.0215136568291089	0.276040830400256
SPRTN	367.27203110408	-0.346839151594359	0.150876555656228	-2.29882734322642	0.0215147454863919	0.276040830400256
TATDN1	932.458119795059	-0.457033149169433	0.198847726470078	-2.29840771771763	0.0215385946720125	0.276040830400256
NDUFB5	2961.14405795286	0.444492391527784	0.193393323217257	2.29838540510752	0.0215398634411727	0.276040830400256
RNF139	1862.84136140325	-0.346081862804396	0.150592703956075	-2.29813167379837	0.0215542960243464	0.276040830400256
CTC.332L22.1	26.5420646643383	0.918049606919436	0.399505718609762	2.29796361892929	0.0215638598487341	0.276040830400256
KLHDC9	56.5688972805389	1.15799264978051	0.503949362751628	2.29783532904522	0.0215711631763105	0.276040830400256
RPS12P23	2.5581952292343	1.321035907011	0.574934479302799	2.29771557380412	0.0215779825841407	NA
LAMC2	543.923676935625	1.04267548389515	0.453821368078169	2.29754603294827	0.0215876402204843	0.276090809107748
GGT1	377.698029210949	0.860361350892565	0.374529577673283	2.29717865338553	0.0216085803491102	0.276090809107748
RP4.737E23.6	6.04796677133808	-0.8550298494327	0.372232758070891	-2.29703009983302	0.0216170527159616	0.276090809107748
BIK	12.3430781270883	1.05686485208872	0.46014719796201	2.29679732218206	0.0216303344016363	0.276090809107748
VDAC1P1	4.52689940310204	-0.780407955540345	0.339811022561324	-2.29659399997688	0.0216419412478316	0.276090809107748
RP11.102N12.3	47.9807934815911	0.878016239497846	0.382315080726688	2.29657757112	0.0216428793418207	0.276090809107748
POPDC2	429.423523052025	1.22721529330986	0.534427058311189	2.2963195336477	0.0216576180242922	0.276134629809725
PPP4C	5867.39987473853	0.506216119403313	0.220489824396065	2.29587066337356	0.0216832775854482	0.276317573361979
PAX1	2.94531024941953	2.0879116459499	0.909518307212164	2.29562355083288	0.0216974150047236	NA
LRRC63	9.09221718608072	1.12457062461321	0.489943777766119	2.29530545268	0.0217156253529788	0.276485203271294
RP11.672A2.6	4.7876014497527	1.28380463416853	0.559332201866462	2.29524534772813	0.0217190677095916	0.276485203271294
STAU2.AS1	4.9719882360068	-0.96010712811255	0.418381867866021	-2.29481055909432	0.0217439832579637	0.276658211983747
ARHGAP4	3717.85491777305	0.838721755811365	0.365599381652297	2.29410058633259	0.0217847216994475	0.277032257363771
FCRL3	195.409022493855	2.03455659146602	0.887090072553033	2.29351748420608	0.021818229930366	0.277314016112857
ERI1	1147.28252546267	-0.461504333979633	0.201241118128173	-2.2932904481563	0.0218312887872882	0.277335701396081
AC006262.4	4.6274555218452	2.28039627216742	0.994492704395047	2.293024636671	0.0218465866061223	0.277385792204242
TRGC2	157.399910992904	1.76968367989244	0.772080256908186	2.29209808702943	0.0218999837695188	0.277919326496403
CTD.2631K10.1	2.40114897792905	1.93865572879553	0.84591157603107	2.29179477350517	0.0219174884175614	NA
B3GAT1	62.1636470125051	1.47926500411316	0.64556890555313	2.29141303335499	0.0219395364769862	0.278276706436291
HAO2	14.7538940621181	1.41287157410346	0.616700033987877	2.29101912799836	0.0219623073855146	0.278331508183265
FNTB	668.943401919994	0.403679478711798	0.176226453745949	2.29068604702078	0.0219815781954892	0.278331508183265
C2orf81	386.293591090017	0.787743504059266	0.343891566559913	2.29067409805766	0.0219822697907042	0.278331508183265
LMO3	138.515283801495	-1.72965459508851	0.755126192784405	-2.29055038961195	0.0219894310366246	0.278331508183265
AC034220.3	46.190827366058	1.01767291343438	0.444406665491519	2.28995870777236	0.0220237104444063	0.278443617261549
RP11.977G19.5	187.551323437062	0.70821161808199	0.309280137149116	2.28987100371251	0.0220287955806188	0.278443617261549
CTB.176F20.3	31.8496118500383	1.16339887412776	0.508077168390208	2.28980742790288	0.0220324823843209	0.278443617261549
OASL	1224.18233009078	1.28064680030184	0.559399283496539	2.28932506365959	0.0220604724993087	0.278653196838476
GNPTG	3716.80076640279	0.440843620675185	0.192611543587447	2.28877050910003	0.0220926898134284	0.278787358661992
PRDM11	448.958514644509	0.842276197428497	0.368007176693055	2.28874937982804	0.0220939181452216	0.278787358661992
NECAP2	6076.06331911416	0.398093040702605	0.173967778369917	2.28831479273201	0.0221191956661899	0.278833638367894
SNAI2	5735.73893325807	-0.785712250088908	0.343369905353007	-2.28823853762357	0.0221236335960027	0.278833638367894
[truncated: 24,484 more rows]
