# Supplementary material for: Identification of Subtype-Specific Metastasis-Related Genetic Signatures in Sarcoma
Source: Front Oncol. 2020 Oct 6;10:544956. doi: 10.3389/fonc.2020.544956 (PMC7573283; doi:10.3389/fonc.2020.544956)
Supplement: Supplementary file 4 [file Table_4.XLS]

TransID	baseMean	log2FoldChange	lfcSE	stat	pvalue	padj
FOXA2	155.982868496265	-8.65319244046253	1.45037796174819	-5.96616376467315	2.42896506013449e-09	6.12293512358702e-05
TMEM158	2603.24365525294	-5.44208009674548	0.951909332255283	-5.71701517396829	1.08411439597677e-08	0.000104432835172813
ADH1B	11979.0602099322	6.81037202857136	1.19989921139976	5.67578673597645	1.38052684763453e-08	0.000104432835172813
EYA1	518.985396111601	-5.46326720313537	0.967901370257449	-5.64444619153934	1.65713797481454e-08	0.000104432835172813
IL11	147.006281741945	-4.54697470523098	0.815499758718609	-5.57569104910052	2.46549155665179e-08	0.000120514401651807
SCG3	18.0203248921606	2.68868596555725	0.485334224491774	5.53986475685441	3.02705326836966e-08	0.000120514401651807
KRT17	592.619347922838	-4.95218855897334	0.896767534867793	-5.52226565572919	3.3465598681476e-08	0.000120514401651807
RAB3B	156.945643913244	-4.23294741316036	0.772678905531921	-5.47827484722952	4.29492643033136e-08	0.000135333131819741
TRDN	161.951731770227	-5.1497319405171	0.955171132134711	-5.39142334526796	6.99017769455964e-08	0.000164543863579699
NTSR1	180.305359863413	-6.60943069362727	1.23255505909277	-5.36238170041033	8.21317566733733e-08	0.000164543863579699
IGF2BP1	283.021317297858	-5.76139862213173	1.07527721247986	-5.35805888496837	8.41208261252886e-08	0.000164543863579699
PRSS3	288.2627537386	-5.85356350289052	1.09459324808165	-5.34770656876359	8.90757223531479e-08	0.000164543863579699
SH3GL2	36.8901211349452	-3.17558014772942	0.594823327669602	-5.33869470145144	9.36181346533953e-08	0.000164543863579699
KRT13	55.0993156554071	-6.46513886701187	1.21281218563649	-5.33070078251146	9.78344998864309e-08	0.000164543863579699
GABRG3	42.2179752543935	-7.25167206806308	1.36039654110671	-5.33055756093271	9.79116928631974e-08	0.000164543863579699
PTPRN	81.2391177895451	-4.90664925143862	0.930404971160341	-5.27367050212486	1.33721901971732e-07	0.00019905333084546
NDE1	2240.0516327733	-0.923460906727721	0.175131342338577	-5.27296196326993	1.34239393223295e-07	0.00019905333084546
FLJ22447	97.7745717752776	-2.91489269132542	0.557183303886403	-5.23147888853415	1.68159242622847e-07	0.000233259802443487
TRHDE.AS1	11.9435173942594	-4.47438564850469	0.856814518739593	-5.22211698173215	1.76889160642305e-07	0.000233259802443487
RP11.441O15.3	45.6360014001602	1.62386490456017	0.311458578478783	5.21374274708182	1.85068075566079e-07	0.000233259802443487
CLVS2	43.9288480328455	-4.86408737730517	0.94239967147987	-5.16138483969014	2.45129667722607e-07	0.00029424898399769
SLC7A4	332.460862737153	5.29078085624144	1.03245252452458	5.1244785891513	2.9836224987057e-07	0.000341868890669879
RASEF	117.101829358088	-4.42076312111572	0.869197706955869	-5.0860271325361	3.6564176724581e-07	0.000391653985512468
CYP24A1	104.455276601723	-5.5365797414832	1.08938397434317	-5.08230327586873	3.7288541940254e-07	0.000391653985512468
FAM196B	41.7708063244622	-5.12685340033882	1.01921796009576	-5.03018353390978	4.90010552617195e-07	0.00049408744041497
LINC00460	27.4864606692543	-5.04301780284564	1.00686652733423	-5.00862593594952	5.48200000275333e-07	0.00053150098488233
BLK	150.428475347138	4.7835264434354	0.959690821758269	4.98444533904305	6.21398089690778e-07	0.000580155668330561
VSNL1	192.696028344003	-4.80417641479111	0.965495550718991	-4.97586592834478	6.49565970851894e-07	0.000582703071781752
TAGLN3	27.5183893604779	-4.63274069469143	0.932969612317013	-4.96558583852062	6.84939886102213e-07	0.000582703071781752
RP11.631N16.4	65.3662580038507	1.86679481237174	0.376128592711231	4.9631824023678	6.93473982602847e-07	0.000582703071781752
DDIT4L	1144.39048684371	-3.3338162384732	0.679490167711072	-4.90634949097716	9.27871293036214e-07	0.000754509017898609
ACPP	146.650039522802	-3.3148752796642	0.678608061612158	-4.8848156501252	1.03525669342878e-06	0.000815523460248522
ACADL	30.0341278675733	-4.00539193763923	0.8352124581702	-4.7956563607951	1.62143035378381e-06	0.00123857625327825
TP63	609.364780467381	-3.3791947290344	0.714911865766523	-4.72672911284142	2.28165321280243e-06	0.00163030780665229
CTXN1	761.864900878819	-3.61558104595988	0.7649677266876	-4.72644912958063	2.28479996683018e-06	0.00163030780665229
CA9	674.222122376964	-4.52190309086404	0.957499101369745	-4.72261862637286	2.32827201838632e-06	0.00163030780665229
GLI1	492.374668404108	-3.73543203052905	0.792621528862207	-4.71275620773409	2.44388514550877e-06	0.00166501234454014
LRFN5	254.215874666036	-3.86610492446185	0.822154878403773	-4.70240465150308	2.57115298039036e-06	0.00170562169288632
IL1RAP	922.305612447178	-2.03817081885928	0.435249787403877	-4.68276120481599	2.83036171092929e-06	0.00182942969254117
ECEL1	94.3911183869311	-3.16141620814349	0.676668909243906	-4.67202817353613	2.98240038119615e-06	0.00185285482730197
MYBPC1	103.31995506573	-4.68207684024139	1.00417314328869	-4.66261906279177	3.12210347908189e-06	0.00185285482730197
RP6.24A23.7	13.1907490633192	-5.69684013082925	1.22300467430371	-4.65806897596087	3.19189274433985e-06	0.00185285482730197
IPP	545.51119318176	-0.799488045186201	0.171851879560375	-4.65219261628921	3.28424083653302e-06	0.00185285482730197
CDH12	127.311279583696	-5.14279588914501	1.10597070167129	-4.65002904812347	3.31888280921673e-06	0.00185285482730197
MSLN	46.1254124100848	-3.7732017629136	0.811706737735749	-4.64847904729598	3.34391581370541e-06	0.00185285482730197
PKD1L2	18.9481856653181	2.92834123691579	0.63026643669285	4.64619574585227	3.38112194763134e-06	0.00185285482730197
HHIP	458.606389290806	-4.58904493212726	0.995974068711395	-4.60759479216625	4.07353515010285e-06	0.00218480157582537
SUSD5	327.425419091064	-3.1149219240117	0.677754030274778	-4.59594747485136	4.30787217252872e-06	0.002262350869273
LEPR	1875.90340759261	-3.03147703299931	0.661768112601077	-4.58087504561697	4.63034448102714e-06	0.00238207599342311
FOXD2.AS1	701.30858983917	-2.01859604051261	0.441745124851388	-4.56959438135668	4.88669063147685e-06	0.00245277863631568
FASN	8578.59269632591	-1.66391409242776	0.364384273248252	-4.56637186230632	4.96238140479608e-06	0.00245277863631568
PRRC2A	14327.7669820715	-0.739645745508087	0.162302093555245	-4.55721629528041	5.18360366485403e-06	0.00251285156122385
ISCU	4488.75034820267	0.89914878780542	0.198224065125113	4.5360223403647	5.73251105052189e-06	0.00272651204833124
KCNG3	22.015605308211	-4.02555898302382	0.891672136304893	-4.51461789498752	6.34310278938906e-06	0.00296105435397999
FAM209B	14.9178505098171	2.0386114440704	0.452937172226359	4.50087025105458	6.76758091966055e-06	0.00310176690586915
KRT75	309.92350111596	-4.97766426774627	1.11193188213296	-4.47659101041142	7.5844344694794e-06	0.00341407900190423
TMEM163	288.873248904131	2.8285455560618	0.633898983812142	4.46213928132759	8.11454524104593e-06	0.00358862204274186
DEFB1	330.929277263642	4.55192128685047	1.02668458920138	4.43361216748295	9.26672605244865e-06	0.00402751086776079
MS4A1	73.3550396349818	4.36663052366743	0.9862049597715	4.42771097468336	9.52384010214233e-06	0.00406910103889498
EDNRB	1525.63887618504	1.56770349798844	0.35439906986463	4.42355421132244	9.70902548547538e-06	0.00407908524063106
ROR1.AS1	229.600278371871	-3.70889541242617	0.839660475401497	-4.41713707037681	1.00016809142842e-05	0.00413315364733241
RP11.230G5.2	42.1991693079857	-3.90028727185817	0.88472634936216	-4.40846740313552	1.04104685024438e-05	0.00423269500015489
BRD3	1812.95137835985	-0.878040423967286	0.199719111237896	-4.39637658371816	1.10072898989305e-05	0.0043365786017781
OCA2	29.5959507326917	-5.10912565457896	1.16213626188773	-4.39632237813479	1.10100377068311e-05	0.0043365786017781
DMKN	266.155558939002	3.76405139416699	0.858527664416191	4.38430996481236	1.16354002772593e-05	0.00451238723367927
RP11.330M19.1	43.1768237200773	-3.77549838971823	0.862415788451563	-4.37781687241256	1.1987400472649e-05	0.00457846047143238
C17orf99	19.5521378104217	4.62772235762893	1.05851732373268	4.37189099684268	1.2317502150917e-05	0.0046333364085121
HMGB3	1741.7586890105	-1.28678675058388	0.294546660980247	-4.3687025556544	1.2498685963933e-05	0.0046333364085121
MYOZ1	102.706874069603	-3.72961078990639	0.854406167392903	-4.36514965860647	1.27035753467313e-05	0.00464103952667249
MRAP2	186.399924463394	-3.98581910116648	0.914373801583588	-4.35906966523266	1.30616531276071e-05	0.00470368788629599
LINC01529	12.0342923744801	3.45853649617709	0.794293804597095	4.35422821651169	1.33536537013841e-05	0.00474111130288015
WBP2NL	21.4405101626764	1.69682829666826	0.391010599945134	4.33959666798382	1.42744464612492e-05	0.00499764231104403
FCRLB	256.923975334132	-2.89555074894133	0.667777976674647	-4.33609799975792	1.4503430187276e-05	0.00500825298850486
SYTL5	154.774613244019	-4.91079754069429	1.13874669654196	-4.31245821007161	1.61449405026073e-05	0.00549975216472602
LINC01050	56.6915858168896	-4.69072197644464	1.08887700488895	-4.30785291211381	1.6484694435473e-05	0.00553245037162348
MAP1LC3C	571.425156485772	3.37387117268017	0.783729027653589	4.30489500022887	1.67064954948636e-05	0.00553245037162348
STMN2	123.035392224118	-6.15060377794757	1.43027960743759	-4.30028069054738	1.70581910612249e-05	0.00553245037162348
HMGA2	886.895989986109	-4.60170287766012	1.07028929470193	-4.29949444551032	1.71188166053091e-05	0.00553245037162348
ARG2	118.831153175567	-2.03744129521779	0.474721361710522	-4.29186773453054	1.77176480586113e-05	0.00565349964887941
CCL24	60.1524128616847	3.08887813255436	0.722028979258434	4.27805285007649	1.88535263973094e-05	0.00594074616779219
FMO2	307.936439467424	3.25404522203536	0.763909011638435	4.25972880599492	2.04675085383991e-05	0.00636969080538227
HORMAD2.AS1	26.2140225197344	4.81548053923832	1.13425172758628	4.24551307449696	2.18093790600216e-05	0.00664949709866856
SERTM1	31.8351673406087	-5.14787571415625	1.21279356438334	-4.24464300053715	2.18941708659747e-05	0.00664949709866856
RP11.146E13.5	42.8697476562123	-3.5275670707857	0.83305721402628	-4.23448355213982	2.2907754987883e-05	0.00687450818731612
KIAA1244	109.409486101684	-2.22865259336799	0.527365369282738	-4.22601240653922	2.37868882484687e-05	0.00705435151726351
CTD.2562J17.7	5.59290042107296	2.11182502246747	0.500769507164135	4.21715977561567	2.47398685811247e-05	0.00725165822317433
RP1.261D10.2	39.1127604209998	-1.8611122743664	0.441636707492561	-4.2141249646866	2.50748431016158e-05	0.00726536373454633
AC096559.1	34.7385190951474	-2.95058918834768	0.702015050670309	-4.20302839024655	2.63367541712536e-05	0.00754428294487454
SLITRK6	308.530474054114	-5.33704346025185	1.27170893994785	-4.19674918733427	2.70773512093353e-05	0.00766927943016769
FAM189A1	14.4476109152414	-3.10769691830432	0.741212022195406	-4.19272330351522	2.75625549068346e-05	0.00768286422896229
NPFFR2	23.5134845514526	3.69017321993575	0.880434386949039	4.19130973827961	2.77348716612015e-05	0.00768286422896229
PCDHGA5	206.933955378128	-3.04585014951449	0.729230337268051	-4.17680120238181	2.95637187506379e-05	0.00810045893767478
RAC3	615.223962943556	-2.5799929157932	0.618662324757583	-4.17027643764173	3.04230376391407e-05	0.00824627884739202
STEAP1B	238.231902686163	-3.35260869749445	0.806990262019781	-4.15445991764925	3.26056764835941e-05	0.00874387119998341
RLF	1385.16101838348	-0.679467409844595	0.163803792232612	-4.14805665109211	3.35309436511067e-05	0.00889734765849575
FBXO2	259.609760663472	-3.34750247242174	0.807807078372185	-4.14393802932169	3.41392035530487e-05	0.00896438586630471
RGCC	1069.14403570134	1.30696583234916	0.315801351718776	4.13856946854689	3.49478058141754e-05	0.00908210607179107
KRT79	2.36908195699622	-3.44906122053651	0.834191490466579	-4.13461568471214	3.55549119811533e-05	NA
HHIP.AS1	132.684098773307	-3.26169753665328	0.789984739658328	-4.12881081483166	3.6464427244489e-05	0.00927907872407145
SPOCK3	15.5336258384631	-3.5194448851161	0.85277210760319	-4.12706378848141	3.67424500587743e-05	0.00927907872407145
HMGN2P3	41.4647927122182	-1.57173810585567	0.380875912092056	-4.12664087162274	3.68100552367163e-05	0.00927907872407145
MYOC	88.6545955363639	3.81000760230634	0.924230483065376	4.12235656810384	3.75016115645994e-05	0.00935980816158834
WARS2.IT1	41.2712792143835	2.91662755464943	0.710944780356042	4.10246707654113	4.0876803577438e-05	0.0101021810252947
PTCH2	1885.93566661811	-3.29383217921142	0.803952916532387	-4.09704612232566	4.18455552706135e-05	0.0102391134738743
AP000807.1	2.03265014168214	3.58378741666592	0.874911030565314	4.0961735438977	4.20035103845197e-05	NA
CTAGE11P	33.1620534549563	-3.12755998086762	0.764345225765591	-4.09181594316228	4.28008309483167e-05	0.0102391134738743
PUM1	4239.35953972586	-0.539720230192535	0.131953080710287	-4.09024349630407	4.30920546357613e-05	0.0102391134738743
CAMSAP1	1869.27351412123	-0.955103224383592	0.233619973535289	-4.08827725613676	4.34588557214704e-05	0.0102391134738743
HEXA.AS1	8.54088181671872	1.38951615748743	0.339983615447603	4.08700918030438	4.36969834911535e-05	0.0102391134738743
SPOCD1	418.46975899731	-3.25141581830913	0.795725450373925	-4.08610258322293	4.38679885424635e-05	0.0102391134738743
ADH1A	20.2364554336388	4.03324586004372	0.98798127160562	4.08231003558304	4.4590256359466e-05	0.0103122126817378
LAMA3	1722.65098033744	-1.89571306407723	0.464710238462672	-4.07934430355681	4.5162905746278e-05	0.0103496957095652
YAF2	740.480936589781	0.56723490481998	0.139125477711452	4.07714614282535	4.55918389831531e-05	0.0103538655593453
CLSTN1	15390.9553681721	-0.601318411895588	0.147686093845473	-4.071598051234	4.66917001428937e-05	0.0105089676535899
ITGA2	1434.16220337413	-3.04704998980806	0.749246832279698	-4.06681731377755	4.76595754405527e-05	0.0106318812186323
TNNC1	559.283954245686	-4.08610880992757	1.00542328906249	-4.06406819334537	4.82247263102402e-05	0.0106635868493731
RP11.621L6.3	9.32346211962067	2.24302690263998	0.552541114738249	4.05947511019619	4.91831499197358e-05	0.0106899695667386
MMP27	70.7775721900874	4.15167860703791	1.02272395768258	4.05943224058751	4.91921798532879e-05	0.0106899695667386
FATE1	81.379906296889	2.08864922611179	0.515225000918733	4.05385845482533	5.03797064910745e-05	0.0108544584720257
CTD.3222D19.8	42.8092042687183	0.997630767733425	0.24629655493776	4.05052668310983	5.11024816850862e-05	0.0108802134463497
HSD3B2	8.44296196395683	3.20536015307544	0.791836207731213	4.04800907281003	5.16551445984066e-05	0.0108802134463497
ERBB4	16.776772124409	-3.65811188149222	0.90382217407477	-4.04738010022489	5.17940976500304e-05	0.0108802134463497
SPTB	130.125912165079	-2.70289649087915	0.670508923190211	-4.03111188739897	5.55136070502457e-05	0.0115651818720876
FLRT3	390.720953965311	-3.706226355516	0.92363746350439	-4.01264186648963	6.00429719952042e-05	0.012406256049632
CXADR	93.4413147991162	-3.41664090116149	0.852274844939389	-4.00884869646067	6.10154928130514e-05	0.0124940344309917
SLC14A1	651.425814980504	-3.06602064291085	0.765365318093633	-4.00595711672391	6.17668554432603e-05	0.0124940344309917
SIPA1L1	2590.13384660395	-1.20349028811848	0.300573800853532	-4.00397601088637	6.22866835894291e-05	0.0124940344309917
PTCH1	1734.74004454512	-2.68398802488079	0.670434592515639	-4.00335551721727	6.24503466480863e-05	0.0124940344309917
CNTN5	19.0174177905224	-4.05661418787981	1.01462954775903	-3.99812344992266	6.38466514368596e-05	0.0125744708166119
RBBP8	1643.43160922207	-1.09981737425553	0.275084264634447	-3.99811081785085	6.38500580976804e-05	0.0125744708166119
HS6ST3	18.8820928485221	-3.45238036857407	0.864123928370431	-3.99523755242444	6.46294166769429e-05	0.012603765823995
LRRN1	71.194209284373	-2.76259645903692	0.691706178393653	-3.99388721010486	6.4998792332567e-05	0.012603765823995
C4orf19	21.3669625005512	-2.55901407239452	0.641674889669254	-3.98802277226952	6.66262695122828e-05	0.0128207252050811
ACTN3	30.4127563128336	-3.38172823596511	0.850214261619261	-3.97750118837632	6.96432748829646e-05	0.0132106512697422
ATP6V1G2	130.898001886574	-2.27791594216023	0.57274127954909	-3.97721628158807	6.97267405013407e-05	0.0132106512697422
BRINP3	24.9789356919381	-4.59298983277053	1.15531719566603	-3.9755227828343	7.02248203009148e-05	0.0132106512697422
VGLL4	2391.26797661019	-1.30950220475274	0.329541964039455	-3.97370395169446	7.07635099416026e-05	0.0132133819156142
ZBTB12	446.351929308759	-1.22377392975405	0.308363157702254	-3.96861265422536	7.22922798778194e-05	0.0133995866997064
AC068039.4	8.87460283906613	1.30323641283794	0.328626880593187	3.96570241145684	7.31801198049838e-05	0.013465142044117
CADM3	3395.4096072158	-4.27697906290129	1.07900418155285	-3.96382065614063	7.37596741208052e-05	0.0134734338060671
MEX3A	504.009367723137	-2.64736858132651	0.669041074063342	-3.95695972034726	7.59097246672485e-05	0.013766419708
C9orf92	34.9191172052907	-3.13296240291348	0.796529956598422	-3.93326374853845	8.38002001467534e-05	0.0150888246092811
KNDC1	30.2368920019926	3.45909824692012	0.880931968708236	3.92663493866888	8.614257364754e-05	0.015400581535512
NRAP	101.074587946865	-4.5471256896279	1.16167305369472	-3.91429040655259	9.0670457111786e-05	0.0160959217103796
THBS4	4987.36541249405	3.20750464916983	0.81996845300606	3.91174152787329	9.16329528405436e-05	0.0161530312951358
DPEP1	67.4429292896948	-3.04877560747336	0.779798226170709	-3.90969805412963	9.24115612420623e-05	0.0161771571929855
HYOU1	7511.59466682343	-1.2426921032363	0.318549532572113	-3.90109535933781	9.575841811052e-05	0.0163330557570475
MYOZ3	400.420205877901	-3.19075716528857	0.817915917781735	-3.90108212338281	9.57636546152115e-05	0.0163330557570475
BNC2	2799.97324955513	-1.23741265045246	0.317207448996236	-3.90095710037106	9.58131304687805e-05	0.0163330557570475
ZSCAN1	13.5506988508467	-3.23973259571591	0.830540254425178	-3.9007532488093	9.58938532229064e-05	0.0163330557570475
DDX11.AS1	54.1421536609672	-1.35458749630732	0.347437037263088	-3.89879992927061	9.66706066766664e-05	0.0163548500208416
LINC01537	64.6821001232295	2.6183536645004	0.672140679276219	3.89554411037868	9.79785280519014e-05	0.0164585811049566
PPP4R4	97.3042007518604	-3.67524612120587	0.944121040238848	-3.89277006291067	9.91060769880236e-05	0.0164585811049566
RP5.991G20.1	241.777845231431	-1.58697999768037	0.407708640388258	-3.89243651095817	9.92424757201446e-05	0.0164585811049566
PRRC2B	6477.87919639905	-0.911806744723456	0.235552504821529	-3.87092782313779	0.00010842189354104	0.0178633927606702
TCN1	11.0790410557062	-3.30387352772199	0.85456963382236	-3.86612558761802	0.000110578011693672	0.0180246244078877
OTUB2	68.9067283920613	-1.44442301604827	0.373663763027902	-3.86556888563052	0.000110830561060877	0.0180246244078877
RNF208	96.6041953108955	-1.0166716760372	0.263332159204539	-3.86079573079228	0.000113018359696556	0.0182626077642998
CD19	36.6392332940044	2.73564303450873	0.709327981692507	3.85666871336626	0.000114942773831534	0.0184552703359575
LPHN3	297.132379151922	-3.28491383341489	0.852624644215083	-3.85270805354089	0.000116818643456241	0.0186377491407907
PKIA	561.460791548477	-2.60780187518422	0.677294074201939	-3.85032436354476	0.000117961497127302	0.0187017196200316
AL133493.2	46.4662394320178	-2.82508243357196	0.734730740471573	-3.84505816615042	0.000120523846056763	0.0187631341165346
PTGDR2	21.4954131631463	1.99212897244826	0.518110026124384	3.84499212908496	0.000120556308080907	0.0187631341165346
UNC5C	464.129184669933	-2.65044260326382	0.68933260426453	-3.84494014481101	0.000120581867933934	0.0187631341165346
LDHC	28.0174185393539	3.31409763775046	0.862434921298107	3.84272199085143	0.000121677272116371	0.0188174274571133
ACVRL1	8581.28939172029	1.64106838930042	0.427713745329816	3.83683808907046	0.000124628580182688	0.0191563246905195
BMP5	45.8173687524312	-3.85367080534534	1.0058892213829	-3.83110855890004	0.000127567201326247	0.0194891758244365
NCDN	2404.57899434463	-1.06114077492256	0.277919490731982	-3.81815889244663	0.000134451323379388	0.0203910361911444
CSF3	8.03471519141142	-3.16294670294974	0.828648882985427	-3.81699265864498	0.000135088188032415	0.0203910361911444
FAM174B	814.924628411854	1.33007170486666	0.349378687881233	3.80696290587364	0.000140683836788178	0.020993509187735
C10orf71	50.3354663617923	-4.90369864144729	1.28812325335388	-3.80685515045206	0.000140745122688322	0.020993509187735
PCDHGB6	181.936576147516	1.79891190254994	0.473685628288562	3.79769153868876	0.000146049912312897	0.0216566246446088
PRKAG2	887.257619314075	1.37132574967076	0.361450732655369	3.79394928762884	0.000148269969074504	0.0218572478387725
RP11.114H24.6	15.8007495281558	1.67558707690369	0.442026953161931	3.79068983218736	0.000150229462859035	0.0220173505799451
RP11.177H2.1	41.3728874212373	-3.33926683886758	0.881555623179248	-3.78792528918916	0.000151910511224797	0.0221063333993872
ATP1B4	22.3518118616323	-3.48229701763458	0.919584631767895	-3.78681515255414	0.000152590527272825	0.0221063333993872
RP11.100L22.1	14.9269842753293	2.14995495114743	0.568002196089006	3.78511732164241	0.000153636081238536	0.0221306190620629
IMPG1	41.5245965400658	-2.96709603338498	0.784408292972863	-3.78259136213343	0.000155204098014196	0.0222294596746696
NFYA	1288.90531284792	-0.873752965296582	0.231497404764114	-3.77435317768205	0.000160423355299791	0.0226297527872718
RP11.76E17.3	12.7491789053123	2.59427671690859	0.687458663734778	3.7737203031446	0.000160831066747334	0.0226297527872718
RP5.1142A6.2	25.5754465808656	-1.12027529383773	0.296971331015024	-3.77233482440449	0.000161727028303568	0.0226297527872718
COL4A6	20.1648556246063	-2.24328753756595	0.594698964792597	-3.77213963765398	0.000161853628476914	0.0226297527872718
CLCN2	414.93208274661	-0.961687885528142	0.255010855872243	-3.77116449509089	0.000162487514062845	0.0226297527872718
NPC1L1	25.9179503664154	2.00642142867708	0.532561835788202	3.76749007128447	0.000164897096826986	0.0227566746030845
RP3.508I15.20	7.30123808151985	1.72883743522341	0.459022396451299	3.76634658480512	0.000165653795401082	0.0227566746030845
ALOX12P2	54.5639713241281	-2.89344887949232	0.768427166470815	-3.76541721290409	0.000166271209622035	0.0227566746030845
LINC01018	20.1890475294694	-3.96212646502408	1.05255063927745	-3.76430958964976	0.000167009869944884	0.0227566746030845
WISP2	9415.95960526153	2.92393455173788	0.77752304261919	3.76057607487518	0.00016952250901473	0.0229748570281899
NBPF13P	8.0879324768239	2.74856319382571	0.73198985863071	3.7549197730243	0.000173397010410682	0.023374287906056
ANKRD11	5519.42680214546	-0.757867391590146	0.202056235951872	-3.75077457035606	0.000176289142648507	0.0236377484461892
NUDT10	50.0435556617981	-2.94476712882451	0.785495146369772	-3.7489310308714	0.000177589910987149	0.0236861718315559
FAM19A1	20.4598020720411	-2.83416908981698	0.756852074462266	-3.74468034831063	0.000180623592422351	0.0239639974620138
FAM166B	27.2361990726437	-2.24218392025311	0.599331872095562	-3.7411391328369	0.000183188068201584	0.0241179904694387
LINC00969	594.180647514518	1.0430816001841	0.278989707326966	3.73878165677862	0.000184914240885658	0.0241179904694387
TYMSOS	33.6741201328521	-1.13248362625023	0.302943673604964	-3.73826465089673	0.000185294837719657	0.0241179904694387
PAGE2B	10.8972750681177	4.4651479489854	1.1945811822684	3.7378354985523	0.000185611319861596	0.0241179904694387
SEPN1	14545.6067072854	-0.812210701007619	0.217812900662711	-3.7289375355473	0.000192288805661731	0.024753388495289
OACYLP	20.5807836571336	1.95656780066711	0.524804984914528	3.72818067074147	0.000192867093877115	0.024753388495289
LRRC1	354.842354270291	-1.88605781363092	0.505995037471388	-3.72742353967764	0.000193447220468579	0.024753388495289
BHLHE22	165.672941560719	3.47891727110698	0.933810795678973	3.72550551696874	0.000194924189118016	0.0248164088852876
TLL2	53.0888184416836	2.77105154423904	0.745825997969518	3.71541291371329	0.000202872129683194	0.0256984957037887
PDIA6	9661.69215565234	-1.3689771341076	0.369373288696189	-3.70621584181088	0.000210379028364416	0.026516172735051
LRRC41	5832.40964806494	-0.68030800472889	0.183721976244429	-3.70292122170398	0.000213131079621277	0.026729394303946
CCL28	129.024204749467	-3.06790263537912	0.829611393321649	-3.69799964185118	0.000217305195710612	0.0271179671954115
LGI3	20.9590775711148	2.51653348017723	0.682277672075	3.688430067664	0.000225642024338975	0.0280196263523985
ANK3	293.952830506508	-1.82066825743723	0.494158683994358	-3.68437976789257	0.000229260210424422	0.0282027412299798
RP11.260M2.1	29.1012983416089	0.956911424551486	0.259728534656642	3.68427529850161	0.000229354250719845	0.0282027412299798
PAGE2	98.0373134858325	6.55784514342356	1.78179973085405	3.68046140644564	0.000232812295723665	0.028437025352845
RP5.1157M23.2	15.9533666717095	-1.24788516225225	0.339127602302279	-3.67969210934343	0.000233515719138326	0.028437025352845
UNC5A	232.834013701787	2.48615093426796	0.676685526934011	3.67401227795197	0.000238771251343581	0.0289372389609086
ARHGEF26.AS1	7.60781585147757	-2.61433393232412	0.712326524611496	-3.67013418986466	0.000242423171512963	0.0292392502751137
CREB3L3	4.24182206042931	2.36500296101236	0.644780404631329	3.667920029866	0.000244531635267533	0.0293531117229713
PRKCE	884.319892209734	-0.853684760555449	0.232848254487778	-3.66627081844953	0.000246113284556424	0.0294029558156319
TBC1D27	9.75291861774094	3.20881665464179	0.875882317634415	3.66352487090751	0.000248768049002253	0.0295799291474
RP4.598P13.1	9.11703698057898	-3.02554285493345	0.827487319954132	-3.65630116858003	0.000255880712801598	0.0302828216352238
RP13.476E20.1	3.36469633610044	-3.68658743052026	1.0093227559667	-3.65253573123828	0.000259663450990491	0.0305868984699453
NTN4	6159.36344020285	1.3585990920829	0.37223328252164	3.64985925728958	0.000262384034202099	0.0307636127170536
EIF3K	8665.83236678353	0.580319189596011	0.159110243343677	3.64727736819888	0.000265033778956869	0.0308420222703418
ERMP1	1241.28333555291	-1.57893829962964	0.432962359754289	-3.6468257899502	0.000265499795012067	0.0308420222703418
SGK2	24.650422839342	2.20570575126818	0.605390268764279	3.64344434503459	0.000269013840934117	0.0311068848727854
LINC00930	5.81408478809015	3.68620019164599	1.01249474201591	3.64071045377148	0.000271886763478097	0.0312955321176068
COL17A1	90.7444876331119	-2.26679984331191	0.62292905469405	-3.63893741386849	0.000273765316720834	0.0313685277449945
DUSP4	1254.11888168753	-2.57757014491513	0.709088608626009	-3.63504661273526	0.000277930379172813	0.0315906440942248
ENO2	4144.36928332841	-1.89007878787883	0.519997100018994	-3.63478717056266	0.000278210210604487	0.0315906440942248
CTD.2562J17.6	1155.81483151126	1.28063569860343	0.353149563802803	3.62632671781674	0.000287481579897587	0.0324970209240285
GADL1	18.328354561478	-3.0724441462617	0.847766127395599	-3.6241647866971	0.000289896738039293	0.0326237364843504
CELF1	4809.85229091491	-0.513695531754992	0.141947029052773	-3.61892415207936	0.00029583032088296	0.0328562461216769
AC064875.2	16.2774319101027	-3.08266040558131	0.851826049403274	-3.61888487413691	0.000295875218830875	0.0328562461216769
ISL1	72.2773908300191	-4.50983149801808	1.24653363901145	-3.61789795066787	0.000297005451404504	0.0328562461216769
MLF1	653.285691703385	-1.3012797018145	0.359924946293185	-3.61541959015677	0.000299861542512509	0.0328562461216769
RP11.326I19.2	15.2296819726043	1.7569500853934	0.486050108930539	3.61475093434139	0.000300636503644624	0.0328562461216769
NPY	12.7013944887279	-5.72309424246263	1.58401100445792	-3.61303944628918	0.000302628643515632	0.0328562461216769
OR7D2	8.70817428617177	2.4154903965592	0.668671969165368	3.6123697536988	0.000303411512749037	0.0328562461216769
TMED10P2	3.48607270786785	-2.8861750501341	0.799007080244888	-3.61220209619358	0.000303607800633088	0.0328562461216769
FOXCUT	9.72728597258422	-1.71118771344788	0.473733839734211	-3.61212894229373	0.000303693484066595	0.0328562461216769
FGF7	2304.71647832582	2.03216031108722	0.56355799563861	3.60594708408746	0.000311016514899856	0.033181731055626
GMDS	1148.65436453547	-1.18027759235442	0.327321219137532	-3.60586947422587	0.000311109493668414	0.033181731055626
ASB8	1498.57475371479	0.513863359694167	0.142599025117029	3.60355450727974	0.000313894883240037	0.033181731055626
NUP160	3100.58783270518	-0.77935424644781	0.216402290052007	-3.60141404354137	0.000316491066115226	0.033181731055626
FREM2	38.7376393185253	-3.60623059947421	1.00135200774836	-3.60136153077994	0.00031655501110289	0.033181731055626
AC008746.12	30.5777172171724	1.57772236948739	0.438124847239283	3.60107941704049	0.000316898749136197	0.033181731055626
TADA3	4568.03568596261	-0.935929383844577	0.259954745360071	-3.60035506391004	0.000317782929335923	0.033181731055626
LINC01004	84.0140288101719	1.0756539377163	0.298805821752062	3.59984263830319	0.000318409814725023	0.033181731055626
DHTKD1	1157.51356987654	-0.885911671878551	0.246233870587901	-3.59784650975665	0.000320862870136914	0.033181731055626
MIR100HG	36.7479926502883	-2.31096792358676	0.642337262373944	-3.59774850215899	0.00032098376671904	0.033181731055626
CCDC171	242.735849522865	-1.38139031370026	0.383976763198843	-3.59758830766773	0.000321181465311518	0.033181731055626
FOXC1	975.604064507322	-1.30933171868012	0.364371412648862	-3.59339858514613	0.000326392719721369	0.0334122758650545
ANKRD33	10.4509961369661	3.85738808526261	1.0734918092478	3.59330928474014	0.000326504649725586	0.0334122758650545
IGLV7.46	31.6131287847411	4.63535335726236	1.29024875148	3.59260441209132	0.000327389405691386	0.0334122758650545
AC114271.2	51.7908355163093	-0.984917015980486	0.27465202117893	-3.58605413407401	0.000335719296513009	0.0340037141718509
ZNF644	2087.81171532877	-0.509330222590562	0.142035844937281	-3.58592736090997	0.000335882451158	0.0340037141718509
NDUFA13	1548.29954431777	0.733238650808242	0.204573874696775	3.58422429010092	0.000338081475984206	0.0340142370383635
NOL12	302.938134117485	0.636035400238403	0.177487546368727	3.58354945601113	0.000338956549988754	0.0340142370383635
CYP4F12	225.000355504344	3.18266194647816	0.888336664030059	3.58272046550413	0.000340034422947779	0.0340142370383635
AJ011932.1	22.8595418250964	-1.72284482588951	0.481476631296828	-3.57825222222963	0.000345899571777374	0.0343370739091462
CTD.2227E11.1	42.7502440447604	1.94735337858398	0.544229090040133	3.57818685958219	0.00034598606684081	0.0343370739091462
AC003075.4	19.0221465598479	1.37376678426021	0.384678573181097	3.57120692452365	0.000355340014969751	0.0351271023425784
GRB7	23.38902402931	-2.227275762523	0.624055012162058	-3.56903753533928	0.000358295094331761	0.0352808700699806
RP11.793H13.10	123.344787004809	1.42256323673163	0.399055392645136	3.5648264951444	0.000364096964345479	0.0356243649786894
CNTNAP3	74.177839683883	-2.88221388889106	0.808598252298715	-3.5644572328686	0.000364609892276335	0.0356243649786894
PRKAG2.AS1	181.728721657582	2.62391577378358	0.737916288776599	3.55584476680113	0.000376766503231829	0.0363225898333149
KBTBD4	408.151069307734	-0.589527673987301	0.165800319817914	-3.55564859365009	0.000377047767423346	0.0363225898333149
CTD.2649C14.2	24.8986212543558	1.54848800573702	0.435725950708417	3.55381175534632	0.000379690882132716	0.0363225898333149
ACSL6	59.9162315239044	2.3557208647339	0.662901256133754	3.55365273928307	0.000379920510617551	0.0363225898333149
LINC01531	2.60934480162025	4.31125670329655	1.21319120108077	3.55364982820174	0.000379924715598685	NA
RP11.322E11.5	75.4045539036812	2.3033585244352	0.648198340413009	3.55347797244834	0.000380173033857662	0.0363225898333149
MYH15	446.605164496544	-2.84731034357379	0.801309886028769	-3.55331987439322	0.000380401607267341	0.0363225898333149
ANKLE1	80.9517954676072	-1.80106580618662	0.507712876100586	-3.54741014255821	0.000389038435588302	0.0369002381209908
ELAVL2	56.7897796245175	-2.61463789120828	0.7371033080291	-3.54717970022332	0.000389378901149776	0.0369002381209908
H19	14516.8906831701	2.80910201376967	0.793473350410813	3.54026006332196	0.000399732922516144	0.037739578692086
AGAP7P	9.33242244299797	1.67261014179117	0.472699233709785	3.53842363708606	0.00040252368988237	0.0378612581140104
RP11.777F6.3	3.61621990337876	-1.89663003726921	0.536467519233988	-3.53540516297682	0.000407150362724184	0.038094283067506
CTD.3203P2.3	21.2499855379895	-1.65385982424714	0.467879137138556	-3.53480138986699	0.000408081759151646	0.038094283067506
DIRC1	53.0042085321303	3.29817104360962	0.933304966685649	3.53386209367563	0.000409534699749846	0.038094283067506
SLITRK1	18.0427319703351	-3.53389709484061	1.00031327226729	-3.53279036959165	0.000411198386363554	0.0381084151597517
RNA5SP283	14.1074096649097	-1.78683168759997	0.506041151419338	-3.53100075475737	0.00041399056662623	0.0382266454341173
LINC00941	95.6667388546289	-2.43945035562674	0.691057029220256	-3.53002755558287	0.00041551638783477	0.0382275076807988
ZMYND19	1313.72666812798	-0.795407870586039	0.225553573356832	-3.52646982598534	0.0004211391506099	0.0385991567196312
PARD3	2136.17435657077	-1.17902807694757	0.334424709516145	-3.52554115589551	0.000422618504229538	0.0385991567196312
PRPH	74.1505457178811	-3.49142050347105	0.990656477484854	-3.52435035032053	0.00042452253548528	0.0386330833014907
RP11.53M11.3	5.67788566924191	-3.64822144475462	1.03603184088358	-3.52134104454092	0.000429370004625724	0.0387873326475917
RP11.574O7.1	18.6818735430098	2.62070341031067	0.744260491291942	3.52121796195504	0.000429569365141645	0.0387873326475917
TEX11	5.01297169298512	-2.73631045974857	0.777264058413088	-3.52043868506567	0.000430833590182707	0.0387873326475917
S100A1	231.256634300907	-2.30739810100648	0.655755779207482	-3.51868511749162	0.000433691126206602	0.0388417777851632
PRPF38A	2419.26798131661	-0.619808349041014	0.176241030156742	-3.51682209579563	0.000436746402688803	0.0388417777851632
FAM216B	7.67360711956575	-4.01784429626251	1.14259505941383	-3.51642015529434	0.000437408197796771	0.0388417777851632
RP5.884M6.1	30.1608398640874	-3.23068102119889	0.918870521773672	-3.51592628628764	0.000438222634975081	0.0388417777851632
PRRT3.AS1	54.1477998367104	-2.02400677581492	0.575887368740927	-3.51458789631043	0.000440436889849421	0.0388417777851632
FOXC2	462.476353588985	-2.66430164411796	0.75811448985128	-3.51437900183205	0.000440783429147435	0.0388417777851632
CAMP	4.88096467134957	3.73497869481031	1.0630369124499	3.51349859169292	0.000442246758102227	0.0388417777851632
SHISA7	9.20928792738893	-2.35432998255514	0.670255104162732	-3.51258792052933	0.000443765154003769	0.0388417777851632
NDFIP2	1231.74893805141	-0.87284490919504	0.249034045292281	-3.50492202048366	0.000456741041531406	0.0398391978371062
CTD.2553C6.1	12.0481812711915	1.8339481651022	0.523404233719245	3.50388485028176	0.000458523580541119	0.039856766959588
EFHC2	36.158448665412	-1.46237362997898	0.417845495299486	-3.49979513104679	0.000465615857476283	0.0400241646051761
LPAR3	27.6084620801048	-4.31237143016304	1.23227726872782	-3.49951389967215	0.000466107302867881	0.0400241646051761
GNG11	4996.48980813477	1.09711491750257	0.31353210797193	3.4992107334691	0.000466637620873979	0.0400241646051761
PFKFB4	527.066780003801	-1.64574734334373	0.47033208472484	-3.49911774423501	0.000466800396458338	0.0400241646051761
RP4.657E11.10	38.7076028420764	-1.20492206680541	0.344555335290425	-3.49703499958805	0.000470460104488642	0.0402012146235583
RP11.583F2.2	3.63228744614514	2.54050831736237	0.72705726016231	3.49423416361349	0.000475423822030795	0.0402858795699011
BTBD11	406.757022669082	-2.50956416673706	0.718366548082671	-3.4934312760458	0.000476855704656812	0.0402858795699011
C9	11.8080304979522	1.99613061994394	0.571497798853542	3.49280543853064	0.000477974622132251	0.0402858795699011
GAPDHP74	7.6034700407166	3.33847454859258	0.955861921126902	3.49263264369473	0.000478283988354784	0.0402858795699011
ANKRD19P	63.2319364609709	1.13507684670023	0.325051854500137	3.49198698910899	0.000479441600720816	0.0402858795699011
IGHM	2148.04887294085	3.4114139849728	0.977271703513237	3.49075285072612	0.000481661597485456	0.0403152328937122
LMBR1L	1594.91106172859	1.03423138584015	0.296399229185292	3.48931874311186	0.00048425334596537	0.0403152328937122
ZMYM4	2932.57423641614	-0.631294202196302	0.18093150628649	-3.48913362384051	0.000484588843493922	0.0403152328937122
MS4A14	148.527798260618	1.4520504321018	0.416405541499935	3.48710640802561	0.000488277043543591	0.0404452384546227
CTB.12O2.1	5.66339442167619	2.21007720020671	0.634031663304107	3.48575209744165	0.000490755566603529	0.0404452384546227
STK38L	2843.40834509947	-0.91367765168142	0.262126373640525	-3.4856380111313	0.000490964890793182	0.0404452384546227
CD79A	95.7322811419206	2.45724066872084	0.705864230612427	3.48118032073798	0.000499209291099388	0.0409661298713613
TMEM74	20.4563948843541	-2.78775388251833	0.800970939406962	-3.48046819848718	0.000500538241843037	0.0409661298713613
TMEM107	568.700845451184	-0.973776975264806	0.279968850554886	-3.47816185027306	0.000504864985783159	0.041069053382574
FAM135B	5.93921224856078	2.94712427593584	0.847346821108588	3.4780614059307	0.000505054210909153	0.041069053382574
ADRA1B	404.114061795886	2.31521681196596	0.666639791392709	3.47296522328667	0.000514742048805375	0.0417222429784112
RP11.244M2.1	80.3010187594229	-2.73349409759679	0.787967095001553	-3.46904599815987	0.000522310019691766	0.0421820283097261
ACADM	1943.73929837786	-0.741171044558468	0.213698625489903	-3.46830047624001	0.00052376130041829	0.0421820283097261
FCRL2	6.67663039704177	4.16391616033011	1.20191789989415	3.464393167534	0.000531429176122215	0.0426632696550599
RP11.180I4.4	6.47878517857503	-3.26967789420955	0.944426017679478	-3.46207943555323	0.000536018925108267	0.0428599913209932
RAB43P1	28.2319934363964	-1.13093894943152	0.326724339691368	-3.4614468897537	0.000537280119701438	0.0428599913209932
CCL21	229.589285314242	3.23468885729355	0.935649025791925	3.45716050370035	0.000545899603984223	0.0434102120417485
HIPK4	25.5942402015023	1.62728419384857	0.471191587049073	3.45355103651095	0.000553257604922812	0.0437789310790936
CHD1L	2303.48165200819	-0.945247585169668	0.273732135018232	-3.45318457077284	0.000554009799041212	0.0437789310790936
NIPAL1	14.3245207820098	-1.77103694725752	0.51308473302777	-3.45174360735006	0.000556976713949126	0.0438758406413424
SIGMAR1	3552.49302163414	-1.11793962430968	0.324477098206883	-3.44535756294547	0.000570304445102403	0.0447857771094747
TET1	158.307172125822	-1.66464443715505	0.483892653082255	-3.44011099683318	0.000581475661447864	0.0454286263029113
RP4.583P15.16	5.30038052529799	1.83974299224643	0.534836534805352	3.43982295995539	0.000582094822907027	0.0454286263029113
RP11.103J8.2	3.20663470786322	3.01166270472081	0.876985180062798	3.43410900570196	0.000594505068015839	0.0462539622053804
FAT1	7838.70583067856	-1.97566801168294	0.575452534938068	-3.43324234707832	0.000596408749842592	0.0462592977416371
RP11.87C12.2	6.57918880830536	1.51981340626162	0.442807342651448	3.43222268438742	0.000598655781335453	0.0462911501101353
RP5.1056L3.3	39.4469578292082	1.25974662515735	0.367216774304433	3.43052581828135	0.000602412641986341	0.0463758985244996
UPB1	23.189222299383	2.09342966833363	0.610317348761622	3.43006744373456	0.000603431240718656	0.0463758985244996
MARCO	2150.23222279649	-2.77263547339973	0.80915026170263	-3.42660146653787	0.000611185368766423	0.0468290601090091
TTLL5	1686.27089544585	-0.873798028921352	0.255081185453209	-3.42556832393912	0.000613514605829328	0.0468650793446839
DLK1	762.937924731154	4.70875282211663	1.37557584821966	3.42311391132009	0.000619081281494645	0.0470204643324019
UBASH3B	592.412425226974	-1.60327115283128	0.468378185242163	-3.42302695417454	0.000619279362042107	0.0470204643324019
CTD.2201I18.1	49.5445930634838	2.40443754265066	0.702831490312869	3.42107258395652	0.000623746827884938	0.0472174475595301
PIANP	68.4980152340275	-2.90723169046925	0.850631942433838	-3.41773162450383	0.00063145338508556	0.0476577153629845
DPY19L2P1	24.329932242493	-3.36631607600643	0.98540518276224	-3.41617451876002	0.000635075324613669	0.0477879963667504
LRP8	482.424188101774	-1.72529851349606	0.505313417144172	-3.4143136812926	0.000639429111309564	0.0478205794337685
TMEM119	4254.55287535915	2.25500856616698	0.660520427253854	3.41398762721433	0.000640194830017634	0.0478205794337685
APLN	4070.82811278341	2.2639067966154	0.663209826617133	3.41356039334191	0.000641199454483249	0.0478205794337685
AFAP1L1	1833.51374866107	1.25115835026945	0.367355102255509	3.40585537695681	0.000659571089050929	0.0490456283563299
RP11.1112C15.1	8.62996489493865	2.81158095535007	0.825862079246553	3.40441948601771	0.000663048436906996	0.0490699391070096
SYT13	13.3866410108091	-3.96489639376282	1.16473677767421	-3.4041136759501	0.000663791226415832	0.0490699391070096
ABCA13	24.3692813948742	-3.44331246912955	1.01228201967246	-3.40153475238422	0.000670086081403487	0.0493262301239269
COQ10A	664.5249529305	1.24219917238533	0.365235365348748	3.40109225512487	0.000671171728518999	0.0493262301239269
PAX6	551.221350949028	-2.05271221634048	0.604591598595659	-3.39520466560982	0.000685773156695663	0.0501699663286446
EXOC3L4	64.378952154526	2.31876006432803	0.683020478361629	3.39486170296105	0.000686632750848238	0.0501699663286446
DGCR9	16.1609456792927	1.99489903490676	0.587919656485906	3.39314906875303	0.000690940267650214	0.0503387926789786
PFDN5	12876.4845817951	0.8070855452651	0.238152484457843	3.38894447018867	0.000701622174764785	0.0509697169494833
AC008592.4	2.85692243187727	2.86376815378576	0.846373762794248	3.38357387678372	0.00071548955472038	0.0518277606189406
RP11.230F18.6	8.35041208226991	-1.60325659098639	0.474230213379691	-3.38075589819653	0.000722867296000263	0.0522121455517898
KIAA0125	14.870062529934	2.98775777968153	0.884046198711991	3.3796398695391	0.000725808656245147	0.0522577379600491
C11orf49	1454.89619628993	-0.78152872418043	0.231293683883014	-3.37894537827379	0.00072764463757447	0.0522577379600491
PYY	8.18191041029014	-2.32718779300808	0.689440161602614	-3.37547465700069	0.000736884784896149	0.0527709990274492
LRRN2	211.512917435957	2.91144473560373	0.863193665096879	3.37287546622225	0.000743875887849377	0.0531207461215499
C5orf49	13.2293409728282	3.25076331610333	0.965310930858478	3.36758158660063	0.000758305856882554	0.0535904520250889
KCNJ4	5.36453783728275	-3.20524252554162	0.951891935457168	-3.36723361775539	0.000759263389656847	0.0535904520250889
LINC01572	18.3262714296708	-1.49629301748401	0.44438886869828	-3.3670803273426	0.000759685566861705	0.0535904520250889
ZNRF1	1355.1584112758	-0.90376729466174	0.2684388448868	-3.3667530310036	0.00076058770351257	0.0535904520250889
BRINP1	77.3047821244112	-3.60911613156986	1.07222082706554	-3.36601942479265	0.000762613378857571	0.0535904520250889
UXT	3587.24934405293	0.669932006452626	0.199098014367908	3.36483519727463	0.000765893907940938	0.0535904520250889
LRRC42	1870.64067990447	-0.856818077336331	0.254652891535321	-3.36465088682289	0.000766405658667841	0.0535904520250889
FADS1	3126.637375965	-1.32666922872182	0.394340748750024	-3.36427121195838	0.000767460852945775	0.0535904520250889
AC073621.2	30.9528961563302	2.60745596243551	0.775536217784679	3.36213306695555	0.000773428425319004	0.0538579661476283
FGFR4	596.998736014143	2.88128841370002	0.857906671419634	3.35851032482609	0.000783637937349978	0.0544185816107941
ARHGAP32	809.883285785948	-0.943384565396109	0.281025267463274	-3.35693859100907	0.000788106145952826	0.0545686964403674
MAL2	30.6704714771481	-2.40939400126581	0.718443275660074	-3.3536315014601	0.00079758504563636	0.0545686964403674
SDCBP2	216.153463549157	1.16788994188101	0.348291623521732	3.35319560680776	0.000798842284686936	0.0545686964403674
RP11.285F7.2	112.284538332661	0.893161240667081	0.266382017668222	3.35293368706108	0.000799598616993724	0.0545686964403674
CCR3	11.1070492566431	2.72499725822222	0.812736404284932	3.35286723205139	0.000799790621406517	0.0545686964403674
TM7SF3	2060.99340623804	-0.736913329965387	0.219803615309639	-3.35259876834734	0.000800566712883646	0.0545686964403674
CTD.2168K21.1	13.6786165891216	3.63863817668748	1.08536191707915	3.35246531081496	0.000800952780186288	0.0545686964403674
MIR570	15.1689961925173	1.20406664043129	0.359491375662321	3.34936168694711	0.00080997984992194	0.0549167943944836
GRPEL2.AS1	3.48261128505521	2.01600138050946	0.601960003608075	3.34906201147218	0.000810856452823522	0.0549167943944836
RP11.594N15.3	16.8645171911419	-2.57263552216506	0.768302344471705	-3.34846761912986	0.000812597759010727	0.0549167943944836
SCRG1	51.9050160865254	-2.75713223642126	0.824024911741686	-3.34593311092221	0.00082006175654282	0.0552730394623835
PTHLH	283.670116243542	-1.41815897674069	0.424134689506007	-3.34365241002198	0.00082683262688405	0.0553876432831142
RP11.431J24.2	16.8273906769446	-2.18670667742857	0.654084953994698	-3.34315391918692	0.000828319420099736	0.0553876432831142
TNFSF14	126.002345376008	2.46241299074178	0.736556414307617	3.34314241639795	0.0008283537574474	0.0553876432831142
PARS2	333.220828958311	-0.587653931053615	0.17583904948128	-3.34199902005373	0.00083177354373416	0.0553932588456675
LL22NC03.2H8.5	42.0766864579282	1.18777863335245	0.355447197160711	3.34164579954589	0.000832832636564106	0.0553932588456675
LINC00973	26.9601390684476	-2.62400375295317	0.78548333201686	-3.34062308644487	0.000835906187915895	0.0554513768025892
DCAKD	1511.19748474966	-0.609918103310884	0.182681805882241	-3.33869101175869	0.000841741368975867	0.0556919066381723
RTBDN	18.3834874424608	-2.33803600447873	0.700592514881964	-3.33722664004289	0.000846189155483266	0.0557155944424377
RP11.2B6.2	3.53252787085658	1.92205607207574	0.575962865611012	3.33711804499189	0.000846519861609555	0.0557155944424377
RP11.472G21.2	3.67971985803989	2.60198901092235	0.779946719339865	3.33611123221934	0.000849591636090751	0.0557721509442074
AACSP1	4.98881856789257	3.42619160512771	1.02725936057354	3.33527416407749	0.00085215338843539	0.0557950197809852
HIGD2A	3000.18108706284	0.698530611678381	0.209608165141177	3.33255439361297	0.000860526472836148	0.0560984823895454
KB.1027C11.4	3.10369215415865	2.97209985668752	0.89190000207669	3.33232408315654	0.000861238998919156	0.0560984823895454
MLIP	106.194855256751	-3.05311883500896	0.916550918706228	-3.33109571186578	0.000865048538278707	0.0562014009096125
CALR	60405.6924256028	-1.21144424720184	0.363852461273112	-3.32949306695088	0.000870042302520426	0.0563805304934059
ZNF182	603.215002893018	0.664100535770065	0.199573439981209	3.32759978398224	0.000875976116191276	0.0566195024024351
SRGAP2B	241.96535164815	-0.758499975468784	0.228161324963836	-3.32440204574114	0.000886083547545342	0.0569476285432125
MAGI1.IT1	4.37006447485577	-2.93800941777358	0.883826444839755	-3.32419270200301	0.000886748998548308	0.0569476285432125
ZP3	247.476003799134	1.35151369007312	0.406675294969365	3.3233238084328	0.000889515947184811	0.0569476285432125
CLASP1	3304.63227657448	-0.710168029240103	0.213720866289817	-3.32287643021752	0.000890943720181869	0.0569476285432125
THRAP3	7605.54161358424	-0.393251460598072	0.118385375158688	-3.32179088904306	0.000894416976545366	0.0569476285432125
IQCH.AS1	394.511765753054	1.23933769324211	0.373151477896051	3.32127236968187	0.000896080436835728	0.0569476285432125
LINC00487	9.79316903005563	1.67892114699244	0.505542653521958	3.32102768242387	0.000896866412712446	0.0569476285432125
ALDH16A1	3829.52777717115	1.04935837492335	0.316064396752078	3.3200777617052	0.000899923774433426	0.0569981872007985
ASMT	10.697831505531	2.27470267009669	0.685382470378244	3.31888072486206	0.000903790246601762	0.0570132031298102
EFNA3	144.323364006982	-1.06531345078868	0.321052486763418	-3.31819093360178	0.000906025283755231	0.0570132031298102
RP11.97O12.6	40.892923919761	1.17196699417038	0.353224761830412	3.31790723871464	0.000906945987585444	0.0570132031298102
RP11.168O16.1	2.64475144510133	-3.22706033790568	0.972799492752878	-3.31729237314215	0.00090894445027831	NA
NEAT1	25206.0755912248	1.37427103818526	0.414654453179358	3.31425606947678	0.000918873147747645	0.0576192893244344
DDN	36.1789340089937	-1.94353793050894	0.587016130891848	-3.31087653001314	0.000930042352037058	0.0580537944810373
RP11.68I3.4	7.95711510671427	1.3168507204995	0.397747997895033	3.31076643369308	0.000930408321578034	0.0580537944810373
ZNF804A	177.310527629973	-2.45152884769773	0.740670303041955	-3.30987868371288	0.000933364157227409	0.0580944288281198
BBOX1	24.5046949707661	-1.95934670242702	0.592175831475087	-3.3087245346477	0.000937219998610287	0.0581907431649461
IFT27	1494.08973082291	0.686215042716956	0.207765920342338	3.30282772836986	0.000957151695843743	0.0592822603165333
KREMEN2	47.6867191951891	-1.44532788161012	0.437712747125908	-3.30200089236692	0.000959977647458491	0.0593115601400334
SFRP5	8.54530213379747	-3.72177569567144	1.12906028938718	-3.29634806099815	0.000979505807333107	0.0601861373087173
KCTD16	57.3996161008166	-2.21505562582893	0.672072642419675	-3.29585745054883	0.000981217893296349	0.0601861373087173
MYBPH	29.9166547506259	-3.12089762660935	0.946921635062735	-3.29583516845361	0.000981295716989956	0.0601861373087173
HOXD8	950.377205087603	0.890207094025909	0.27019936698504	3.29463056838026	0.000985511487245804	0.0602979941031365
RP11.131L12.4	9.38723930860816	1.70151471778781	0.516700345612602	3.29303963551734	0.000991105017824251	0.0603574710899064
RP11.775C24.3	9.64756478604152	1.81091924857309	0.549931233528239	3.29299217459359	0.000991272335418171	0.0603574710899064
KIF26B	127.675399913516	-2.18413399916306	0.663590917583917	-3.2913862159466	0.000996949381270453	0.0605568674772664
C12orf77	8.3609806389417	-3.5033392684206	1.06569953956077	-3.28736115421847	0.00101131045283244	0.0612815237860582
HAPLN1	532.966860891331	-3.77927936238327	1.15053774948452	-3.28479388362225	0.00102057001899358	0.061694314241703
FOXP4	2403.95949391142	-0.925462632641501	0.281875573758571	-3.28323103808266	0.00102624521002161	0.061846895276526
CUL7	3679.43000063581	-1.05072396292469	0.320074399896739	-3.28274914602253	0.00102800099654334	0.061846895276526
CYP17A1	12.0017691109929	1.49603559883106	0.45586379168738	3.2817600917447	0.00103161335389691	0.0619164510119843
ZFP69B	118.117139532673	-1.33105579218488	0.405740436660704	-3.28055986516808	0.00103601275959519	0.0620002680636735
RP11.225B17.2	106.0285049871	0.991406721060593	0.302272341655577	3.27984596814434	0.00103863776247961	0.0620002680636735
ABHD17AP4	2.39730105307442	2.41825054279215	0.737400374771883	3.27942678838513	0.00104018195507147	NA
TRIM46	175.45811684334	-1.54965762081811	0.472547245381096	-3.27937076337912	0.00104038850328998	0.0620002680636735
PCYT1B	103.184333832997	-2.95223603299353	0.900541070514975	-3.27829138465089	0.0010443752814168	0.0620910662593274
FOXC2.AS1	5.25468879691419	-2.96252284548213	0.904306541491285	-3.27601616217069	0.00105282535746365	0.0623418074523953
PPARD	3344.20383010035	-0.609765653538163	0.186141106832695	-3.27582479718586	0.00105353895488418	0.0623418074523953
VAT1L	221.358887570336	-2.44705698671398	0.747409479422671	-3.27405131201197	0.00106017358026756	0.0625874838674115
RPL36AP43	4.05037740738166	1.78594832731303	0.54570918401137	3.27271077643403	0.00106521416524633	0.0627381277512371
MFSD5	1873.08130005921	0.656437256193917	0.200766813595557	3.26965021976343	0.00107680545119806	0.0632729879109572
SLC2A1	2594.67937066487	-1.9248479451149	0.589179736318419	-3.26699617529723	0.00108695148830448	0.0635060421486867
SBSPON	169.4939145755	-2.14381039119646	0.656334423763711	-3.26633849083049	0.00108947935658747	0.0635060421486867
CALML3.AS1	2.02763479345922	-2.16773257585026	0.663918428243882	-3.26505860303363	0.00109441431132773	NA
CRHBP	165.177791810226	2.06986032702938	0.633950228585053	3.26502023928474	0.00109456255178856	0.0635060421486867
GNRH1	85.696856521435	1.18628064300492	0.363346799232703	3.26487159240166	0.00109513711010459	0.0635060421486867
TMEM171	42.5873906372511	2.26980456931366	0.695234778125934	3.26480297120941	0.00109540244269622	0.0635060421486867
LINC00511	191.361867146137	-2.26162315157	0.692755434684048	-3.26467760242325	0.00109588735062991	0.0635060421486867
LSAMP	246.028136218216	-2.36806769875488	0.725712828051771	-3.26309196588426	0.00110203751571191	0.0637095752295394
NRG1	55.6322286178811	-2.8294800124792	0.867281248287046	-3.26247110503964	0.00110445431511063	0.0637095752295394
IL6	220.949701498437	-2.21819445305185	0.680148843256563	-3.26133680156111	0.00110888243252179	0.0638189688561855
PLA2G12AP1	15.7696422580653	-1.07321249061302	0.329397570792937	-3.25810687683442	0.00112158156533321	0.064265545998577
SNCB	23.04139252363	2.64552342678637	0.811991816981658	3.25806661035124	0.00112174072672857	0.064265545998577
PLOD2	8030.96767269845	-2.00908191207256	0.616904347278912	-3.25671543884294	0.00112709362696298	0.0644257962550629
LIF	802.406852427499	-1.69971109401585	0.522084049683294	-3.25562731718567	0.00113142156549091	0.064526866115147
RP11.47I22.2	52.6502037943487	-1.75331425138862	0.538863445425896	-3.2537264612612	0.00113901898624514	0.0647304531872926
MAPK10	186.642470201277	-2.34747226031072	0.721681732364829	-3.25278049178057	0.00114281742535006	0.0647304531872926
AC008074.1	2.66558928051986	2.14071160699749	0.658117524279692	3.25278013123947	0.00114281887529374	0.0647304531872926
RP1.152L7.5	401.273248506214	-1.72384388611548	0.530059089065684	-3.25217305329871	0.00114526269920392	0.0647304531872926
RP11.79N23.1	5.77540175470892	-2.27955556478381	0.702263776643906	-3.24601046016887	0.00117034539200252	0.0660001490863522
WFDC2	77.193397811118	-2.35968965136005	0.727891557575925	-3.24181483738931	0.00118771163147282	0.0668299884066225
FBXW4	2295.09415528788	0.689961664420825	0.212888242498533	3.24095711591766	0.00119129103736816	0.0668304825924318
SSBP3	3757.90075118688	-0.653615526581813	0.201699383365356	-3.24054300849231	0.00119302273748787	0.0668304825924318
POLR2J2	7.05851670590131	2.58818749034913	0.799400815221399	3.23765930815608	0.00120514633021824	0.0670931851177051
RP5.1059L7.1	127.688877797934	-1.34440467350914	0.415302343901028	-3.23717092680201	0.001207210807339	0.0670931851177051
SVIL	4853.118455247	-1.29631172489124	0.400454036444899	-3.23710490322304	0.0012074901515976	0.0670931851177051
PHF13	2212.82673651933	-0.758974744140631	0.2344758293297	-3.23689971077329	0.00120835869737536	0.0670931851177051
LETM1P2	4.45239054958899	-2.37836020827659	0.734949486257448	-3.23608663282127	0.00121180599928428	0.0671341675795031
NKAIN2	12.2812974626925	-2.38371533988907	0.736850067814161	-3.23500728847087	0.00121639625664563	0.0671341675795031
EHMT1	3348.8348908447	-0.653898520496413	0.202150705222248	-3.23470808463174	0.00121767155688644	0.0671341675795031
AC010970.2	6.286172039009	-2.63376820400137	0.814371552490854	-3.23411125541611	0.00122021911890959	0.0671341675795031
BMP2	829.145272738507	-2.32023245083771	0.717538876607077	-3.23359824321862	0.00122241284191494	0.0671341675795031
TMBIM4	1918.75419486415	0.646925494523003	0.200241572032005	3.23072520834787	0.00123476587197427	0.0673645143980533
CCL20	22.9546622503503	-2.05694508218201	0.636904002952323	-3.22959986535992	0.00123963579087563	0.0673645143980533
RP11.55K13.1	8.96138529230345	1.08353269412553	0.33553150856883	3.22930236491711	0.0012409261842884	0.0673645143980533
RP4.545K15.5	9.40053706591899	-0.988586769245499	0.306132940172239	-3.22927277505418	0.00124105459664939	0.0673645143980533
ARNTL2	1989.40599575555	-2.00251527975593	0.620121308787676	-3.22923152515241	0.00124123363104362	0.0673645143980533
JUN	15645.5276104179	-0.982596396655365	0.304377685119792	-3.2282143031236	0.00124565616982085	0.0673645143980533
TMSB4XP4	103.085580050389	1.46083396127157	0.452540749449498	3.22807164448424	0.00124627756363602	0.0673645143980533
RPL3L	9.25689764393171	-2.20699989674643	0.68377287751628	-3.22767978859162	0.00124798588638095	0.0673645143980533
CBFB	3281.52000676623	-0.833476398526852	0.258411590992306	-3.22538317776801	0.00125804166815232	0.0676303154627722
FAM209A	9.12008763562022	1.37748144865356	0.427082343317981	3.22532989294753	0.00125827586290226	0.0676303154627722
RP11.3B12.4	2.15834215537212	-2.35413794856453	0.730135391223762	-3.22424851179836	0.00126303740102166	NA
RBM3	12667.6107860718	0.808696051427036	0.25084428880558	3.22389660644746	0.00126459049493191	0.067666665748474
RP11.1252D15.1	15.7449091454505	-1.44399123005894	0.447983501285165	-3.22331341649067	0.0012671682196178	0.067666665748474
VTCN1	13.8421654220043	2.65445198745617	0.823548565371802	3.22318816287147	0.00126772247842643	0.067666665748474
MRRF	1332.82763971893	0.525161806527657	0.162954860053722	3.22274405534469	0.00126968949932673	0.067666665748474
CYP3A4	13.6664347557934	2.42043313109615	0.751640583441851	3.22020016536721	0.00128101118047172	0.0681260123150445
MLLT3	1016.54363682864	-1.31608236564394	0.408940733160075	-3.21827164409365	0.00128965616216875	0.0684413737598944
RP11.6L6.4	4.55916650599176	1.71745752005404	0.534142375508173	3.21535530376162	0.00130283157324621	0.0688223605415814
CRYGS	91.7831624667903	1.0498232479937	0.326524487313408	3.21514400537456	0.0013037909847353	0.0688223605415814
BEND3P1	28.3672112065709	-1.97626215050711	0.614766858898875	-3.21465303781476	0.00130602276712699	0.0688223605415814
NUS1P2	5.10802309695513	-2.60959121665592	0.811884125304024	-3.21424096779662	0.00130789862714083	0.0688223605415814
PRPF3	2463.47473718061	-0.631918475379964	0.19664689459383	-3.21346785915526	0.00131142474802831	0.0688223605415814
MYOD1	9.2166045034996	-3.78219548609299	1.17712613061128	-3.21307580193544	0.00131321625755715	0.0688223605415814
AP001469.9	33.152468973607	-1.51870737349812	0.472943392704202	-3.21118213495791	0.00132190122987776	0.0691337888024037
RP11.1275H24.2	18.9487011367106	1.01374862781358	0.315890402306219	3.20917831125135	0.00133114910824319	0.0694520454530652
CBX2	869.626678218085	-1.62213447815878	0.5055470492967	-3.20867163682478	0.00133349690571579	0.0694520454530652
PCDHA13	1.46924359249253	3.48943515902617	1.08778597697491	3.20783245315422	0.00133739387025378	NA
CTC.428H11.2	17.844873153974	1.12357668252638	0.350306534697334	3.20741000020782	0.00133935961232937	0.0696135610465954
RN7SKP80	4.78678518895391	1.45139094192102	0.452696278621941	3.20610309927711	0.00134545772567113	0.0697701063874755
ACTA1	530.701502849282	-3.41613664543066	1.06568451125417	-3.20557970896125	0.00134790708547685	0.0697701063874755
RP11.968A15.2	14.3145008780478	1.43811489510696	0.448957927200997	3.20322865011608	0.00135896038283698	0.070198101087202
CTD.2619J13.9	22.0303741732738	-1.82703247246437	0.570592655285641	-3.20199086956307	0.0013648132390265	0.0703562620232719
YES1P1	4.88715986303425	1.48046959208628	0.463786043946097	3.19213915858656	0.00141223276137352	0.0726521703034771
AC112721.1	3.76931390395681	-4.05430953605186	1.27088443609386	-3.19014807397675	0.0014219991442873	0.0730056098354262
ZNF687	2143.15407387009	-0.783859724208906	0.246030014146636	-3.18603291930764	0.00144238184027742	0.0737956512344033
PTP4A1	5126.07895349704	-0.801856050597706	0.251695717684625	-3.18581522949244	0.00144346753897976	0.0737956512344033
FRRS1L	31.7725851722488	2.92619346811375	0.91866302088571	3.18527403584017	0.00144616993453646	0.0737956512344033
SMC5.AS1	29.2930341846176	-1.23294184905524	0.387588051342572	-3.18106258638376	0.00146735925502775	0.0747256406075548
LINC00235	42.4182999832657	-1.15563681308315	0.363637387870244	-3.17799228470839	0.00148298697048833	0.0751831279818657
KDM4A	2715.70305437988	-0.453966606758642	0.14286485048373	-3.17759480531105	0.0014850212992183	0.0751831279818657
PAQR4	903.036709228492	-1.12520505794249	0.354111749589057	-3.17754228502239	0.00148529029415143	0.0751831279818657
XIRP1	103.30860230758	-2.23369924067281	0.703137735945982	-3.17675915610994	0.00148930660126004	0.0752353523137537
FZD8	1838.84763831664	-1.84666106218522	0.581749468523803	-3.17432359134104	0.00150186153017961	0.075605363665619
TRH	10.9195605132947	-2.78911452524628	0.878689533580774	-3.17417519915171	0.0015026296095079	0.075605363665619
TEX35	5.8390394517485	2.25239234361623	0.710011184474205	3.17233360948282	0.00151219185515511	0.0759349248700199
SZRD1	10256.2567741241	-0.578641699493049	0.182496790199522	-3.170695215299	0.00152074611778099	0.076033050204991
RP11.212I21.2	49.6671804407117	2.89565514826713	0.91326770815704	3.17065316380289	0.0015209662594929	0.076033050204991
LLNLR.268E12.1	28.8071194547863	1.53920644750505	0.485541988399274	3.17007897211831	0.00152397512035226	0.076033050204991
CTB.129O4.1	24.479549703521	1.19594988949799	0.377352395328807	3.16931839920055	0.00152796909135566	0.076033050204991
NUDT16P1	95.7074920035794	1.66622035619962	0.525774283877687	3.16907921762724	0.00152922708877858	0.076033050204991
LA16c.358B7.4	3.49398840987668	1.50963620023663	0.476473167493999	3.16835512097466	0.00153304135946656	0.0760726507666003
AK4	1196.49671879827	-1.81591818334049	0.573654295954522	-3.16552703631187	0.00154802274884331	0.0766651423435013
RP11.508N22.13	3.72006185225123	-2.32483092135243	0.734875615428446	-3.16357064045051	0.00155846525516667	0.077013028904148
AHSA2	1111.24831916011	0.647682420834561	0.204763975207707	3.16306821147406	0.00156115748056251	0.077013028904148
RP11.475D10.4	4.29123561854679	1.66416992602965	0.526451864992223	3.1611055762035	0.00157171519379105	0.0773824152443062
AC002398.12	34.7817930335309	2.03971362255054	0.645641475468016	3.15920475999777	0.00158200298951855	0.0777370981672193
ICAM5	48.5965739271884	-2.25650974388392	0.714489263212644	-3.15821365003822	0.00158739173484718	0.0777606077317108
ATP6V1E2	248.135537018073	-0.888645368723288	0.281441280202118	-3.15748055184053	0.00159138851610467	0.0777606077317108
PDIA4	13479.7855695776	-1.0155177136908	0.321629271555947	-3.15741695019866	0.0015917357025374	0.0777606077317108
RSPO1	6.22774588764456	3.36431210967031	1.06595815913737	3.15613899179015	0.00159872657083541	0.0778143353981933
IGFBP2	4814.06968432305	-2.37077092243158	0.751174034836898	-3.1560874211345	0.00159900927230499	0.0778143353981933
CYP2B7P	19.9039107645635	1.424661727148	0.45202228371784	3.15175109384054	0.00162294555325316	0.0786821649122292
FAM124A	314.044818740723	-1.76806083322313	0.56099070430582	-3.15167581147527	0.00162336400475562	0.0786821649122292
SEC14L2	651.455666623108	-2.09897592121074	0.666095225846082	-3.15116493823326	0.00162620628051695	0.0786821649122292
OPCML	40.7916778753564	2.49127359375851	0.791619907999733	3.14705778440245	0.00164922365402573	0.0796429691009209
TRIM67	5.56582811409996	2.24132605455389	0.712789031258633	3.14444520925945	0.00166402068567051	0.079989030995529
SMC1B	76.3234999110341	-2.26071032753808	0.71902299046876	-3.14414192244984	0.00166574632324644	0.079989030995529
FAM71F2	82.6210093500573	1.2390682792651	0.394094025607487	3.14409303047693	0.00166602466224893	0.079989030995529
RP13.20L14.1	8.95841456194006	2.08048887889394	0.661826482562887	3.1435564059591	0.0016690824461936	0.079989030995529
RP11.354E11.2	312.474106346417	-3.42230614806288	1.08888992675709	-3.1429312219419	0.00167265136961948	0.0800079615282124
RP11.60L3.6	5.16914198573323	2.93784336751897	0.935759589239051	3.13952793142947	0.00169220281742726	0.0807651858051265
ATP2A1	168.763295302622	-1.91604006497607	0.610385979516633	-3.13906303433345	0.00169488984810028	0.0807651858051265
RP11.274B21.9	27.213380993211	1.57617343054036	0.502212710559518	3.13845786337096	0.00169839351885348	0.0807794411759596
USP1	3793.67263912298	-0.814498276738331	0.259805348052364	-3.13503275757883	0.00171834922320812	0.0814535808397553
RP11.551L14.4	12.6306661008858	-1.50389195283718	0.479723116772007	-3.1349165805406	0.00171902987173714	0.0814535808397553
POU3F2	12.6107397936093	-2.53025481395173	0.808001903801834	-3.1314961042125	0.00173918093493431	0.0819208685111142
GCK	37.3648217191631	2.43027234030076	0.776170044961102	3.13110813291249	0.00174148025531258	0.0819208685111142
DNAJB5	1170.26472053931	-1.21854708559359	0.389231013705236	-3.13065260137875	0.00174418354039309	0.0819208685111142
RP11.379B8.1	22.0833578143642	-1.76839409849164	0.565071087645627	-3.12950730829225	0.00175099716836616	0.0819208685111142
NOS2	98.7014677445948	1.66080035806116	0.530730967979395	3.12926973977828	0.00175241358256046	0.0819208685111142
AC004448.2	9.34294344474049	3.07976248141561	0.984419671431552	3.1285056270127	0.00175697646788822	0.0819208685111142
FLRT1	36.0585763668851	2.19785696385865	0.702622740188911	3.12807547798371	0.00175954989766416	0.0819208685111142
YEATS2	2557.70545331677	-0.820866652357288	0.262429990838018	-3.12794528451574	0.00176032948211255	0.0819208685111142
NRP1	18122.9383687725	-1.13157759172442	0.361825785247697	-3.12741003505256	0.00176353783570165	0.0819208685111142
ST8SIA6	13.7850652687928	-2.18467783772206	0.698600608603077	-3.12722006081636	0.00176467785754158	0.0819208685111142
RCC2	8325.58270977156	-0.815104084059093	0.260683445805445	-3.12679649273711	0.00176722209908293	0.0819208685111142
ARL5B	1607.75650205107	-1.2023752408475	0.3845526628003	-3.12668551581945	0.00176788926015734	0.0819208685111142
FOXK2	3101.56362876794	-0.524230744122651	0.167752923576756	-3.12501703663477	0.00177794762274544	0.0819831003014764
SAPCD2	543.12103882716	-1.45351606908305	0.465138611396159	-3.12490950755556	0.00177859765859844	0.0819831003014764
FOXP2	210.265109596618	-2.61844498793827	0.837944016718051	-3.12484478162855	0.00177898904573578	0.0819831003014764
RP11.305D15.8	3.21902719466892	1.88720098075538	0.604331621093633	3.12279039336083	0.00179145280818798	0.0822993122538602
ALKBH6	146.222856008957	0.593610512868867	0.190150804193996	3.121788074392	0.00179756286179466	0.0822993122538602
AKR7A2	2643.79701784718	-0.943381665087817	0.302195809490123	-3.12175627676482	0.00179775701058755	0.0822993122538602
SDR9C7	17.7691592737657	2.39161363878894	0.766157907354974	3.12156751999802	0.00179890991161048	0.0822993122538602
WRNIP1	2607.78698781599	-0.698522384551438	0.22385655216641	-3.12040178315698	0.00180604514665049	0.0824123984501038
PFKP	6454.51525332385	-1.6548203914422	0.530374811732229	-3.12009611851188	0.00180792035635145	0.0824123984501038
HRH1	2124.55815688849	-1.22919114586137	0.39421524675842	-3.11807104359573	0.00182038917376321	0.0827787181431471
FOXD2	252.320721298761	-1.70753286857365	0.547685428012546	-3.11772557975476	0.00182252414191711	0.0827787181431471
RP11.290H9.5	3.86683420781798	1.75582147664885	0.56337963280643	3.11658671063839	0.00182957866474857	0.0829496744262267
DRAXIN	85.7868063355552	-2.08980370287889	0.67066392604506	-3.11602223069097	0.00183308452822686	0.082959416135624
PDCD4	3689.89857332918	0.82335781953123	0.264340936342556	3.11475714251179	0.00184096414983778	0.083166710195539
CTD.2353F22.1	20.3424514219978	1.68162911401448	0.540378829303802	3.11194484835945	0.00185859217818764	0.0837031086959854
PSIP1	7307.38674860069	-1.17666169457722	0.378128466423986	-3.11180405354052	0.00185947877141193	0.0837031086959854
FBN2	5164.27096222438	-2.54130922769823	0.817097123614119	-3.11016787876784	0.00186981039161512	0.0840181467947129
BPIFB9P	2.81866123407775	1.68485609003013	0.54188949528562	3.10922449076462	0.00187579135372121	0.0840753512969747
GLP1R	4.81060159325849	-2.51234981319886	0.808111315957291	-3.10891552140032	0.00187775399794497	0.0840753512969747
APOBEC2	26.1867154244614	-3.27065618689303	1.05260583313544	-3.10719937505059	0.00188868973134732	0.0842927817866143
L3MBTL4	150.278769592398	-1.7198547430801	0.553523355337108	-3.10710420165138	0.00188929790976821	0.0842927817866143
CTB.193M12.5	523.118452610926	-0.887789449815592	0.28591704010466	-3.10505959872352	0.00190240687874467	0.0845796427662147
SMKR1	83.4273183831795	1.6971431753	0.546574314319584	3.10505475803913	0.00190243801366407	0.0845796427662147
C6orf118	4.95578584045449	-2.26110131721643	0.728383128081913	-3.10427470110504	0.00190746139979458	0.084653674235954
PLIN5	10.1664763061972	2.29114338007096	0.739083635081441	3.09997850218737	0.00193534689004503	0.0857166476237413
TACR2	53.4007077916776	0.891520749250339	0.287630013160472	3.09954006348062	0.00193821362843274	0.0857166476237413
WNT5A.AS1	15.0417331708642	-1.58492657489483	0.511675382817428	-3.0975236021084	0.0019514485618305	0.0861508149678166
NSUN4	1163.70481064907	-0.485317387739482	0.156718618475684	-3.09674365726227	0.00195658990165714	0.0862267801415615
AGRN	10555.8686187936	-1.40973117712743	0.455577348307146	-3.09438382387924	0.00197222157968247	0.0865572526868405
USP13	1371.09743651941	-0.884209708074824	0.285751830856028	-3.09432735890438	0.00197259700749026	0.0865572526868405
TNNC2	462.812446227007	-2.37891049296829	0.768864259804346	-3.09405784263357	0.00197438988792976	0.0865572526868405
TRIB2	3907.74472027959	-1.64554395731715	0.532085639318007	-3.09262989962724	0.00198391385483165	0.0868237855079794
MRPL35P2	6.61366120002863	-1.3514507782307	0.437209488928435	-3.09108290751648	0.00199427941969499	0.0871001093574855
TOMM34	2645.60218344412	-1.17829306629779	0.381243490852047	-3.09065753139654	0.00199713833737808	0.0871001093574855
SLC2A3	6200.00589565489	-1.8741514324027	0.606828575162469	-3.08843635437063	0.00201212787961977	0.0876022790836875
KLF12	1602.9964735075	-0.894156936372804	0.289713521764621	-3.08634864857728	0.00202631075110703	0.0880547793061714
PMAIP1	778.328932833161	-2.288336730031	0.741671970526904	-3.08537577388195	0.00203295127913242	0.0880547793061714
KRT6A	130.96521689767	-4.06452378068519	1.3173543845837	-3.08536854490345	0.00203300069645318	0.0880547793061714
MAD2L2	2906.78822159506	-0.897860148263134	0.291108557494281	-3.08427947289311	0.00204045820013587	0.0881068265238683
LGR5	13.3518180908367	-2.24240621025909	0.727214949154388	-3.08355351174585	0.0020454432074252	0.0881068265238683
IQCJ.SCHIP1	149.790567453557	-1.47019367699296	0.476793976646002	-3.08349884647246	0.00204581903322245	0.0881068265238683
CTD.2541J13.1	109.006394740575	1.83653767455268	0.595668255694082	3.08315519082466	0.00204818313007723	0.0881068265238683
LINC01436	952.985933606923	-2.64831761159353	0.859397594332987	-3.08159765521452	0.00205892927860722	0.0883477556433056
POT1.AS1	35.9363982901023	-1.77546678782781	0.576201772688595	-3.08132822907393	0.00206079341154648	0.0883477556433056
CTD.2035E11.4	22.3003887522349	1.2028798732031	0.390617242352625	3.07943363165013	0.00207394573238358	0.0886732365542151
SDHAF1	931.732777948371	0.610001736201299	0.198116971357577	3.07899788706299	0.0020769815480158	0.0886732365542151
SRSF4	6998.04432442985	-0.545330991461006	0.177129284148408	-3.0787173000942	0.00207893854346006	0.0886732365542151
ARID1A	5495.80089783596	-0.551679299260418	0.179246010227725	-3.07777728809434	0.0020855071282118	0.088763237934789
QPCTL	816.06945683157	-1.31729468170484	0.42807708247791	-3.07723710430777	0.002089290414068	0.088763237934789
SERPINB2	127.795371260958	-3.42163340539386	1.11210723289047	-3.07671176321795	0.00209297578307514	0.088763237934789
CACNB2	61.7249027252702	-1.71005340754948	0.555861027909256	-3.07640457180719	0.00209513355169785	0.088763237934789
AOC2	36.9760756000705	1.35570650395109	0.440811071588008	3.07548197250854	0.00210162632949881	0.0887691299445251
RCC1	3227.12375592392	-0.741591609464844	0.241151227512275	-3.07521391085225	0.00210351626595289	0.0887691299445251
COL21A1	1288.6532806261	-2.11052483484809	0.686375199060837	-3.07488504499567	0.00210583702423143	0.0887691299445251
CCDC180	79.3903487374076	1.46276184067071	0.475895856871219	3.07370156632094	0.00211420810404304	0.0889732185087095
DHCR7	926.087550222763	-1.92370804541553	0.626081140462371	-3.0726177824089	0.00212190077219781	0.0891481244426041
CNTLN	1236.82045284229	-0.871177446403816	0.283641887110096	-3.07139913388627	0.00213058135735952	0.0891876010860892
RP5.1014D13.2	94.4753834472501	0.641554117360567	0.208896251313127	3.07116146569286	0.00213227808738257	0.0891876010860892
CDT1	1410.7860279801	-1.22140064033174	0.397747822909176	-3.07079151659026	0.002134921645619	0.0891876010860892
AC006273.5	17.5699661062411	1.9685617459582	0.641120493029003	3.07050198420212	0.00213699266328141	0.0891876010860892
ENSG00000252835	2.08715709717106	2.96697115016769	0.966478096466195	3.0698793495849	0.00214145259419397	NA
FAM182A	14.7931224274309	2.3506469999276	0.765880317527379	3.06920930872932	0.00214626162851724	0.0894263853415912
NDRG1	22999.5395625732	-1.35092837574184	0.440438809740779	-3.06723282749977	0.00216050502139325	0.0898713045862723
CBX8	506.753402795061	-1.08491433039018	0.353833831181519	-3.06616901715545	0.00216820713030772	0.0900431059980182
RNF144A	3329.22797048434	-1.40301631032941	0.457688942054923	-3.06543632894029	0.00217352650670062	0.0901155529291272
R3HCC1L	875.807522784045	0.494030850500542	0.161292782322581	3.06294456197362	0.00219170658939965	0.0907200980387297
B4GALT5	5417.55515025831	-0.823138253988949	0.268926807873134	-3.06082632854239	0.00220727084077886	0.0912145628759895
RP11.1109F11.5	8.90027402982761	1.48054349686476	0.484006385029054	3.05893381298243	0.00222126218794314	0.091642515930721
NR2C1	968.22134935924	0.616421562112788	0.201747244021626	3.05541503231991	0.00224749274507532	0.092560994452841
TFAP2A	183.679005672448	-2.48176516185502	0.812371079145746	-3.05496493605451	0.00225086835923483	0.092560994452841
CKM	260.933992563185	-2.86320805616218	0.937683416730247	-3.05349119444422	0.00226195360066616	0.0927619208644725
TLX2	42.2310394441792	-2.70079139307934	0.884653545410334	-3.05293683283281	0.00226613634700377	0.0927619208644725
CNN3	13926.4927044874	-0.943481398714918	0.309065366460351	-3.05269208750361	0.00226798524318324	0.0927619208644725
BICD1	961.024793777682	-0.935493749067238	0.306481819188096	-3.05236294781029	0.00227047386438351	0.0927619208644725
ERC2	14.8089492660559	-1.4700016340687	0.482159940316398	-3.04878425425404	0.00229769425959748	0.0937221308995684
AC004987.9	35.2928208361739	-0.849839153758217	0.278824424680409	-3.04793654548847	0.0023041857715617	0.093835080661595
VHL	2016.11253432264	-0.601788027437957	0.197481172876973	-3.04731847938163	0.00230892932949386	0.0938765976417439
CTC.439O9.1	19.581137637793	1.33661173544295	0.43886626851956	3.04560143105046	0.00232215437666246	0.094262266548965
STX1A	796.58043507764	-1.93483097042955	0.635457894022623	-3.04478233511514	0.00232848762512893	0.094367389154743
SLC25A5P1	4.43131970919502	2.16838489650344	0.712573931243799	3.04303146863445	0.00234207839893151	0.0945203304490049
RP11.389C8.2	375.413051551963	1.29701669674535	0.426266582994009	3.0427360447431	0.00234437872100207	0.0945203304490049
ADORA2A.AS1	20.7333438305328	1.73893735082569	0.571522774495159	3.04263876861555	0.00234513661551605	0.0945203304490049
C16orf95	86.6012093660009	-1.03452019984825	0.340206022188955	-3.0408638659361	0.00235900462989151	0.0945203304490049
IGFBP3	41255.2319910365	1.33471587808039	0.43892888945736	3.04084764101646	0.00235913174720383	0.0945203304490049
AGO3	1306.86311590365	-0.439398580710742	0.144508853879066	-3.04063432043035	0.00236080363255154	0.0945203304490049
ZNF540	125.712183972566	1.32670777481523	0.436346811205674	3.04048921808181	0.00236194148203592	0.0945203304490049
LINC00189	35.9874598631619	-2.32424832851734	0.764442509595509	-3.04044882295618	0.00236225833794324	0.0945203304490049
RBMXL1	812.829704466427	-0.614713374517309	0.202272549674907	-3.03903508165234	0.00237337214974806	0.0948145248032475
CTC.435M10.12	23.6474379777648	1.0421114323291	0.342981493561544	3.03838968542512	0.00237846168616543	0.0948675034570542
ZNF496	1945.55539133413	-0.707967797467417	0.23304951306089	-3.03784285222875	0.00238278178090168	0.0948896731958445
RNF43	30.6384529046932	2.27630286598353	0.749641120721014	3.03652348178839	0.00239323467002772	0.0950802543769298
SLC19A2	594.425451525911	1.03343544033837	0.340421128968676	3.03575586941156	0.00239933548077852	0.0950802543769298
MYO18B	26.3725460060474	-2.31772758336378	0.763515004237156	-3.03560188143188	0.00240056105573171	0.0950802543769298
FBXL19	1375.67899252825	-0.982024467030459	0.323530410868538	-3.03533897909057	0.00240265479364108	0.0950802543769298
RNA5SP18	3.13077766370974	-2.52311807081516	0.83165444199205	-3.03385389822673	0.00241451330813727	0.0953997671967466
RNASE10	6.55218523009959	-2.2957038793099	0.757248632451588	-3.03163819771793	0.00243230550384441	0.0957588760545382
RP1.16A9.1	20.920122939525	2.01489447721709	0.664646478246063	3.03152810278059	0.00243319269351422	0.0957588760545382
MADCAM1	69.9637951955967	1.62040309840227	0.534556423204077	3.03130413940168	0.00243499839538873	0.0957588760545382
HSD17B2	126.133354441484	2.90113698611626	0.957507329340255	3.02988488674568	0.00244646964069968	0.096060135051024
IZUMO1R	3.81743302048173	-2.97064026804049	0.981041918233429	-3.02804621579244	0.00246140440881167	0.0964092901783953
ACACA	2328.88407971722	-0.896585732429372	0.296113090654503	-3.02784902365389	0.00246301106295171	0.0964092901783953
TSC22D3	18446.6751424329	1.20843394184351	0.399169838176105	3.02736786768537	0.0024669353855597	0.0964131894561069
LINC01260	70.2346799279052	1.69963734346426	0.561669802147814	3.02604365939719	0.00247776522673427	0.0966865415410487
UNC5D	12.6839496769765	-3.19242922894842	1.05519731345546	-3.02543343149176	0.00248277051198373	0.0967321160217711
PACSIN2	4078.14404924666	-0.567831830935755	0.187733326317651	-3.02467250793268	0.00248902481065064	0.0968261380044466
RP11.166B2.7	2.52384013033798	2.66804452344076	0.882570940762947	3.02303690299881	0.00250251724244287	NA
PLIN1	24.0120533895465	1.74592667647246	0.577892707822778	3.02119520256671	0.00251778986194656	0.0974156615879131
RP11.279O9.4	8.59353452429082	-1.21410181682679	0.40190102166385	-3.02089756278914	0.00252026607898888	0.0974156615879131
SPDYA	23.1820118152532	1.00635958765228	0.333167037497081	3.02058569542942	0.00252286305229443	0.0974156615879131
GPC2	195.574980204298	-1.24085582465404	0.410831299895971	-3.02035367063865	0.00252479675049446	0.0974156615879131
KLHDC7A	19.8674815337099	-2.68598923247636	0.889338284294662	-3.0202109589903	0.00252598678484546	0.0974156615879131
DCN	195563.311267244	1.52521482518336	0.505030390165187	3.02004563464881	0.00252736602183811	0.0974156615879131
RPS6KA6	107.310657754715	-2.62144390327574	0.868631622513562	-3.01790060980057	0.0025453236907685	0.0979580451860952
GALNS	2224.88277529007	-1.22187259600855	0.404961425793618	-3.0172567513412	0.0025507366566191	0.098016722012278
TIMP1	48650.963681699	-1.0501024169142	0.348123387545216	-3.01646615678128	0.00255739764321919	0.0981231047036064
NAALADL1	220.450924614832	1.44007384610003	0.477825097235774	3.01380956008983	0.00257989693916076	0.098835930155569
ZDHHC22	9.05850892542609	-2.75675436347198	0.915264915726848	-3.01197425587184	0.00259554608739442	0.0991704053991006
SERBP1	13963.7477003112	-0.783085205904519	0.260127653164911	-3.01038815511118	0.00260914020674188	0.0991704053991006
RNF40	4340.07283979795	-0.60511581722911	0.201015511867727	-3.01029413902789	0.00260994803774731	0.0991704053991006
ICAM1	4668.64009503188	-1.65533508079378	0.549988246650331	-3.00976446474175	0.00261450352641092	0.0991704053991006
TUSC1	1503.70350700246	-1.51716910055166	0.504133608677317	-3.00945835476476	0.00261713955298882	0.0991704053991006
SCN2B	75.8806578477265	3.13041865609815	1.0404777575571	3.0086358246119	0.00262423470561662	0.0991704053991006
RP11.562A8.4	15.0814502576926	0.732336395596084	0.243435705344683	3.00833599803761	0.00262682538243137	0.0991704053991006
HIST1H3G	19.6500459196858	-1.8906696300337	0.628490991246736	-3.00826846584257	0.0026274092225735	0.0991704053991006
ZNF135	275.081734439559	-1.85384742754564	0.61641008236283	-3.00749043630086	0.00263414412922153	0.0991704053991006
MTUS2.AS1	4.72578650544301	2.46538129319933	0.819765892829644	3.00742116104563	0.0026347445654945	0.0991704053991006
CCDC173	11.4959262797511	-1.16573777907097	0.38763575662848	-3.00730198165966	0.00263577783354596	0.0991704053991006
TMEM128	1015.95115553283	0.458904089771882	0.152614049367514	3.00695834802721	0.00263875916155139	0.0991704053991006
BCAS1	321.055508773183	2.45806328776179	0.81749005417439	3.00684182664982	0.00263977078795607	0.0991704053991006
RPL23AP3	11.7441439052406	-2.12316800052042	0.706453014729151	-3.00539166264925	0.00265239065527117	0.0992657480942305
RP11.145A3.1	10.850348961685	-2.20163283413301	0.732578925587184	-3.00531827661892	0.00265303075134242	0.0992657480942305
HSPD1P6	27.051281937178	1.46917329558034	0.489012316195287	3.00436869772749	0.00266132602050547	0.0992657480942305
CASC15	426.199176978845	-1.92263130894398	0.639957662841402	-3.00431016078084	0.00266183815862124	0.0992657480942305
DKFZp434J0226	10.3837724795425	2.34718458366337	0.781277142032218	3.00429189257732	0.00266199800506584	0.0992657480942305
ARHGEF26	286.11317789833	-1.77503602353431	0.590997585933962	-3.00345731654588	0.00266930989228064	0.0993913792682574
RP11.793I11.1	9.68060399838776	-3.40278783860919	1.13324107730882	-3.00270428485527	0.00267592310120892	0.0994906630313783
MLLT11	1626.60180317689	-2.03063632184684	0.676413503981076	-3.002063545295	0.00268156193500181	0.0995439991839537
SLC16A1	3499.74647221158	-0.729960455793198	0.243213991721978	-3.00130946671698	0.00268821211867581	0.0995439991839537
GHc.857G6.7	9.56030479659869	1.0831151936995	0.360894388911112	3.00119710081243	0.00268920435751636	0.0995439991839537
FAM53B.AS1	4.72962891735033	1.68008264813059	0.560378943820384	2.99811880274556	0.00271651755579778	0.100407587311657
XK	19.6399037138438	-2.50865515402792	0.837838576530866	-2.99419867298925	0.00275166704889976	0.101557866718397
C4orf47	46.4036382404911	-2.08362369124887	0.696269645695071	-2.99255281934462	0.00276654789409361	0.101957806015076
RP11.84A19.3	7.82828479896001	-3.07209759413851	1.02700997696708	-2.9913025803419	0.00277790091081327	0.102087570301271
ZNF181	648.586820505315	0.738537266954784	0.246897299948949	2.99127316138124	0.00277816856659281	0.102087570301271
RASD1	2117.29687219963	2.50962812232199	0.839371121476136	2.98989095301314	0.00279077057911407	0.102361457791242
CA4	190.891200164351	2.12804402181244	0.711960858199164	2.98899019139215	0.00279901117039967	0.102361457791242
RP11.552D4.1	3.92806623675695	1.89134594760138	0.632877579166899	2.98848625683831	0.00280363108883984	0.102361457791242
TNNI2	140.089070663111	-1.94098922833899	0.649495195638904	-2.98845817701492	0.00280388872081681	0.102361457791242
KCND3	193.58565848821	2.6546057606671	0.888459221279169	2.98787574836029	0.00280923737276891	0.102361457791242
LEAP2	46.8159773971455	1.0795052742088	0.361329707445619	2.98759070168971	0.00281185845339516	0.102361457791242
KCNIP2	42.9441345079544	1.25150620510659	0.418934837550904	2.98735290772881	0.00281404674108737	0.102361457791242
RP11.262I2.2	1.96199464879234	2.66096449040095	0.890805647616452	2.98714371369439	0.00281597312503352	NA
RP3.355L5.5	15.1937316181981	1.43060095252794	0.479108123991168	2.98596680141936	0.00282683330105917	0.102678406128385
RP11.398C13.6	42.4556680644072	-1.26264339040455	0.423122405070675	-2.98410903150743	0.00284405407046315	0.103155273393144
SLC35E1P1	4.45709097608081	-2.02631448797265	0.679203787019941	-2.98336747629642	0.002850954691838	0.10325699119519
KLK10	15.9403273467527	-2.01193473697563	0.674534193856283	-2.98270236750118	0.00285715693327894	0.10333315921678
RP11.43F13.4	39.1603585640273	2.99818307084408	1.00569324698984	2.98121030425329	0.0028711154907098	0.103689225343571
RP11.171I2.3	3.31494435447716	2.62502324367301	0.881289320075642	2.97861687856118	0.00289552574474378	0.104421191664523
RP5.971N18.3	2.77549785580205	2.37207768523808	0.796865610977043	2.97676001142734	0.00291311945646716	0.10487079822965
MEGF10	108.267931800799	-2.45331287077663	0.824248447917566	-2.97642401022997	0.00291631345441863	0.10487079822965
COLCA1	31.035373379525	2.09151798655893	0.70285402088241	2.97575019053473	0.00292272835911838	0.104951761362758
XKR3	9.01872127469375	-2.89564383983828	0.973531390683776	-2.97437131205854	0.00293589572888333	0.105244512078597
FCER1A	97.3529910118847	2.1124632766501	0.710400848122133	2.97362155779257	0.00294307808113519	0.105244512078597
EFCC1	293.551605698691	1.86876225903112	0.628453795105544	2.97358735611944	0.00294340610184904	0.105244512078597
RORA	1071.82166312148	1.08521454279779	0.365056339382582	2.97273167378276	0.00295162362908651	0.105257440496124
NASP	7276.00284086661	-0.67141319396629	0.225873079402193	-2.97252419696622	0.00295361927915521	0.105257440496124
EML6	195.389760790376	-1.76451567689756	0.593664019538823	-2.97224628548028	0.00295629434589241	0.105257440496124
PRSS3P2	17.070408237004	3.06456693634833	1.03136825694482	2.97136053559217	0.00296483498434579	0.105393124083918
RP11.753N8.1	10.2954501716599	-2.34621779164733	0.789814598016638	-2.97059309556837	0.00297225304422798	0.105393124083918
PAQR8	1030.25901971324	-0.852185562590772	0.286890212315077	-2.97042396711276	0.00297389011201672	0.105393124083918
RP11.59N23.1	5.13948800770334	2.27710759157115	0.766671770894055	2.97012056269621	0.00297682895698786	0.105393124083918
AC022154.7	9.60670205782324	1.0502390583424	0.353685532993274	2.9694148060118	0.00298367533187451	0.10547021131987
PCDHGA3	77.6053062576216	-2.18837696487784	0.737104788082017	-2.9688817658777	0.00298885574438205	0.10547021131987
CCDC73	11.3406320574679	1.11169417247837	0.374633948275481	2.96741439903065	0.00300315893512662	0.10547021131987
AC003092.1	11.1300063461016	-2.31772703324249	0.781087992847388	-2.96730593027479	0.00300421871121124	0.10547021131987
RP4.549F15.1	25.5091401086822	2.9497283116174	0.994099576145238	2.96723626324778	0.00300489956132375	0.10547021131987
RP11.611E13.2	185.782533016986	1.4808232561497	0.499083005576408	2.96708811881793	0.00300634783256215	0.10547021131987
MYADML2	8.13399242325513	-2.28846826370084	0.771335958872909	-2.96688911929478	0.00300829426923939	0.10547021131987
CTB.46B19.2	3.23873252916168	1.88557682083899	0.636158597936472	2.96400430168718	0.00303664041898655	0.106205710435137
C1orf86	2523.43875770488	-0.748441097397885	0.252537431226953	-2.96368381416404	0.00303980451130435	0.106205710435137
PAPPA2	171.940124141566	-1.65507973791451	0.558493745690579	-2.9634704966445	0.00304191220779787	0.106205710435137
RP11.536K7.5	13.201044746184	2.41380207670192	0.814817872445492	2.96238234129234	0.00305268454796371	0.106363463232191
SNORD116.4	3.36140865209214	-2.6512586219641	0.895041715890014	-2.96216207009718	0.00305486938194647	0.106363463232191
PCK1	13.4376840275161	3.21709365054439	1.0862803991044	2.96156835122567	0.00306076548672291	0.106421760536981
BAG6	12369.9981809292	-0.404388436658542	0.136604139660339	-2.9602941584643	0.00307345429483073	0.106715751878916
TCL1A	30.3254689161985	2.99909850137899	1.01334479325952	2.95960320843224	0.00308035503175184	0.106808238845117
POU2AF1	68.8689108092841	2.07298623140352	0.700644877043007	2.95868320646591	0.00308956531373783	0.10698044289657
ACADS	1252.38164425728	0.96397053221388	0.325882403343854	2.95803186156311	0.00309610120317458	0.107059697022805
TMEM5	899.091260865398	0.542948319517244	0.183610899152648	2.95705931414156	0.0031058836519367	0.107109343043206
DNAH2	159.08504305399	-2.40424289086557	0.813056097200077	-2.9570442914641	0.00310603497955347	0.107109343043206
WIPF3	254.078982824543	2.45187250137643	0.829571510703098	2.95558908393366	0.00312072559600506	0.107468921890841
FLJ37505	6.69349129706593	2.59209023624813	0.877369324494295	2.95438894873852	0.00313288883930945	0.107740602812159
ARHGAP36	3.57510564005214	-3.5748515837498	1.21056376756451	-2.95304690222302	0.00314654151349733	0.108062695466268
EAF1	1069.01125238714	-0.691199963474224	0.234118834782123	-2.95234667521505	0.00315368645212328	0.108149337076419
GPS2	240.111817143447	0.854969228385583	0.289627709739354	2.95195935898191	0.00315764487814363	0.108149337076419
PDE2A	1081.33693926585	1.48845316289502	0.504344573670226	2.95126237219769	0.00316477959026097	0.108246626745317
MEF2BNB	552.447553244592	0.716644479752956	0.242933773117816	2.94995821517744	0.00317816908989536	0.108415872826684
ABCA9.AS1	9.93255293006637	2.74134655652902	0.929295601150413	2.94991879132474	0.0031785746488993	0.108415872826684
MYH13	36.29825502665	2.75300082652261	0.933370972929838	2.94952479385659	0.00318263035114828	0.108415872826684
MEF2B	36.4339318811975	1.36043177186047	0.461314343390559	2.94903419187359	0.00318768706651168	0.108441586467782
RP11.120C12.3	5.98622059644499	2.87696101438803	0.976081948663756	2.9474584775659	0.00320397777958234	0.108848883918749
SPA17	262.481507692201	-1.11354441385019	0.377876519019688	-2.9468473371646	0.00321031652179378	0.108917441293913
C10orf10	13369.021661127	2.16509850973487	0.734857351923742	2.94628407005384	0.00321616884073872	0.108969333517932
ACOT7	2253.80982163596	-1.00966239071258	0.342851417403501	-2.94489781713315	0.00323061337229741	0.109311814615937
TMEM37	1284.03887657383	1.63296544079954	0.554666895291122	2.94404705718459	0.00323950739922113	0.109465821071805
PTPN13	2440.43999858442	-1.60520192151578	0.54539054362737	-2.94321553659447	0.00324822184709222	0.109613355182732
TRMT11	636.946224878601	-0.733602397481048	0.249320400729813	-2.94240822385027	0.00325670302298397	0.109728626354387
SYCP3	8.03027852678066	1.37981008745376	0.469044474079096	2.94174681444191	0.00326366645005156	0.109728626354387
AP000347.4	14.335337541201	1.11897338617765	0.380389826932639	2.94164908457397	0.00326469651562163	0.109728626354387
COX6B1	7136.50710587136	0.59731264961605	0.203254889966113	2.93873692148629	0.00329552673366486	0.110617360722002
DCX	20.5844319560516	-2.95139422233991	1.005473508882	-2.93532768021071	0.00333195620205195	0.11169142545389
RP11.762I7.4	7.94361194433448	1.09087585411142	0.37175505096191	2.93439416973299	0.0033419949940326	0.111879163093724
POLN	84.2325948295372	1.03427207678183	0.352522618755941	2.93391692264114	0.00334713785073628	0.111902720081379
GYLTL1B	16.4654867382891	2.19783465213669	0.749318208440904	2.93311256470024	0.00335582199484779	0.112044451451819
CTD.2007H13.3	25.1022505858892	1.06671841155767	0.364000310463058	2.93054258717708	0.00338370609675058	0.112826009638742
ADAM17	1562.4619695896	-0.975883542834705	0.333270794889312	-2.92820000372016	0.00340930659792184	0.113517202516524
ESRRB	89.9005151701888	-2.25216604624339	0.769250423213727	-2.92774105581174	0.00341434273691935	0.113517202516524
TFCP2	1907.75208405526	0.345399559417006	0.117991830034328	2.92731758899337	0.00341899554021494	0.113517202516524
RP4.575N6.5	6.00709190775133	1.73315007221311	0.592166730842552	2.92679406313005	0.0034247557117984	0.113517202516524
DOT1L	2581.23796754999	-0.925895618464214	0.316373023650452	-2.9265947133571	0.00342695140888111	0.113517202516524
RP11.231C14.4	6.88332231617839	1.7270395043761	0.590325959281038	2.92556930154227	0.003438265858124	0.113730422426883
CTD.2021J15.1	4.6297942270358	-1.97165212799567	0.67404782721839	-2.92509232784287	0.00344354038974468	0.113730422426883
CTA.223H9.9	4.45554408644939	1.33986077943582	0.458120187487799	2.92469272481363	0.00344796499992514	0.113730422426883
SOCS3	5446.89725558148	-1.40558897077541	0.480645173467614	-2.92437966376484	0.00345143498716937	0.113730422426883
MTRNR2L1	8.66550009925046	2.20039580022149	0.752768316415284	2.92307175028283	0.00346596638338632	0.114060157431335
RP11.231G3.1	25.6257344214748	0.948511099600453	0.32463118454077	2.92181141174788	0.00348002186389635	0.114373391323467
ADA	1709.21219108725	1.16966351894146	0.400397888962236	2.92125296158037	0.00348626635077682	0.114429429909352
RP11.167H9.3	2.34046189617132	-2.2141143418549	0.758496496661298	-2.91908314883569	0.00351062569540109	NA
COX14	1496.11266050039	0.684685681408398	0.234614390659566	2.91834477622432	0.0035189502689671	0.115352013498209
MAN1B1.AS1	174.071668264161	-1.04952899200547	0.359685118424052	-2.91791052297061	0.00352385451866516	0.115362759359106
RP11.20E24.1	9.49315066920507	1.32958525481399	0.455845498739885	2.91674538520053	0.0035370437737969	0.115517613170093
URI1	4589.55409544247	0.767568681089665	0.263164919943186	2.91668312499771	0.00353774981622151	0.115517613170093
SAMD1	2811.42510847472	-0.716693396140632	0.245850469176923	-2.91515976577158	0.0035550649971582	0.115762356479746
CYP2J2	22.9711731242843	-2.50641387101787	0.859832828276728	-2.91500136839531	0.00355686983042439	0.115762356479746
MB	284.09228800407	-2.89914147556283	0.994623630721673	-2.91481258439365	0.00355902198793251	0.115762356479746
NPPA	10.2413180441077	1.95352175398872	0.670585681559916	2.91315756913335	0.00357794011368511	0.116227724723936
ACE	2155.60793294002	1.02736386459476	0.352854575430455	2.91157869595841	0.00359607308763251	0.116666422642266
KIAA2026	1696.63792361171	-0.913544608259435	0.313989647151515	-2.90947366114465	0.00362037891165511	0.117303999492291
SEMA7A	1394.31103282114	-1.68304353133311	0.578665150527507	-2.90849298562192	0.00363175323641854	0.117521483419305
ZCCHC11	1660.07876270534	-0.562370966000027	0.193382463247909	-2.90807634029922	0.00363659550911404	0.11752730717147
RP3.395M20.9	21.328570686353	1.57943864046033	0.543244463961175	2.90741782979901	0.00364426072512539	0.117624230933369
RP4.794I6.4	20.512930249645	1.70929319027272	0.587995656830914	2.90698267991501	0.00364933403062716	0.117637355810805
DLX5	184.111432054135	-2.57858964578128	0.887330450092363	-2.90600829207752	0.00366071747841373	0.117694166467221
RP11.65I12.1	30.3962891149282	1.64809206047861	0.567211956979839	2.90560175997346	0.00366547639567674	0.117694166467221
BNIP3P1	5.43292112542339	-2.06914297026312	0.712145458128309	-2.90550609660746	0.00366659706067753	0.117694166467221
AP000892.6	77.107135685024	-1.87937990212974	0.646894232579757	-2.90523521076226	0.00366977208994111	0.117694166467221
SPATA9	29.0777884340127	1.01639063217927	0.350037684727877	2.90366059577107	0.00368827756570431	0.118068141768468
F12	70.9003416804215	-2.15559945712978	0.742427823325253	-2.90344648921573	0.00369080036946815	0.118068141768468
DSP	418.997971720325	-2.46876880633784	0.850638662344453	-2.90225323115886	0.00370488921152271	0.118249346821853
GPSM1	2205.3098789933	-1.09423381317049	0.377039577850905	-2.90217228495622	0.00370584671490257	0.118249346821853
CTB.36O1.7	6.82769411056937	1.70300648950525	0.58704402239876	2.90098599853974	0.00371990499246648	0.118547869848413
KCNE3	849.431428554237	1.05531756709633	0.364266465698414	2.8971032649765	0.00376625762657254	0.119562159204926
FAM183B	4.65811060475224	2.60302408580988	0.898536571761023	2.896959531328	0.00376798357224537	0.119562159204926
CTC.1337H24.4	9.49815422037009	1.12720512418507	0.389102078962847	2.89693935120995	0.0037682259515222	0.119562159204926
HIST1H4E	9.93354638214792	-1.72206136165717	0.594745391442415	-2.89545978234605	0.00378603540431435	0.119562159204926
ACOT2	662.113013800401	-0.775483282884843	0.267880234460026	-2.894888025046	0.00379293806802627	0.119562159204926
TSPAN15	1465.61345674523	1.11532439497266	0.385421956014118	2.89377493308089	0.00380640892553247	0.119562159204926
KB.1836B5.4	7.43553383819674	1.71487100500171	0.592611314158009	2.89375339962624	0.00380666995574487	0.119562159204926
LIPG	372.605400317871	-1.93503370415401	0.668704629184137	-2.89370466376893	0.00380726079566705	0.119562159204926
FAM71F1	4.30286954787717	1.77300612330729	0.612754977742958	2.89349933939018	0.0038097509220178	0.119562159204926
CTPS1	2083.61445253999	-1.17174091710726	0.404972225760548	-2.89338587333169	0.00381112764681266	0.119562159204926
CTD.2020K17.1	273.574163878652	1.69173627021576	0.584705837714126	2.89331174942515	0.00381202726313275	0.119562159204926
AC079354.3	23.2710779679875	2.28917208273863	0.791236672235569	2.89315720954993	0.00381390348091628	0.119562159204926
CSTF3.AS1	7.77629555857277	-2.15453217793054	0.744700917663244	-2.89315096413621	0.00381397932206699	0.119562159204926
ANXA13	6.92543999984165	-2.31096124960127	0.798864110455438	-2.89280895130434	0.00381813464614272	0.119562159204926
SLC39A11	1511.77077401836	-0.835368828417859	0.288839842843549	-2.89215234364443	0.0038261237077158	0.119663680426923
RP11.638I8.1	71.8749981379697	1.13552727407548	0.392764821443915	2.89111247260119	0.00383880708137079	0.11991158476728
RP11.1109F11.3	25.6555211065356	1.32407839802717	0.458044641009151	2.89071911224635	0.00384361487253166	0.119913172904428
RP11.550F7.1	41.4763862186154	-1.14353210842885	0.395738997189066	-2.88961188195089	0.00385717722386134	0.120178402339577
SPIB	49.0829045175411	2.47214268563471	0.855635516158673	2.88924739442005	0.00386165129701116	0.120178402339577
S100PBP	1778.10100569984	-0.565843655326171	0.19598108990169	-2.88723598593116	0.00388642617984431	0.120800285008034
CTNNA2	12.2043238168684	-2.80208659136598	0.970840602702867	-2.88624783879541	0.00389865017848103	0.121031002092549
VPS52	2201.18581699173	-0.323630243063824	0.112178687878074	-2.8849530083252	0.00391472090376441	0.121317684577736
UBE2E1.AS1	3.39826882993753	-1.42340373327716	0.493483476713737	-2.8843999859044	0.00392160303267521	0.121317684577736
KLF15	304.188444867716	2.53677230453202	0.879520221156307	2.88426831300925	0.00392324326466632	0.121317684577736
KLRC2	9.46855312839376	-2.59233386190229	0.898970519110141	-2.88366949393217	0.00393071053824291	0.121317684577736
ADAM22	624.021734824704	-1.94807648492626	0.675577929210169	-2.88357034872911	0.00393194812361196	0.121317684577736
EMILIN3	46.9539286388492	2.16185314873467	0.749901856814102	2.88284810750986	0.00394097422253854	0.121447528363999
ZNF772	274.259320906241	-0.920443538369121	0.319469881950952	-2.8811590399324	0.00396215659064865	0.121951212865777
SNAPC3	1618.51685010436	-1.24529456815689	0.432278292578964	-2.88077053494286	0.00396704338068109	0.121952718951474
CAMK2B	120.759246252892	-2.04073444201711	0.708542294937122	-2.88018719079884	0.00397439122383543	0.122029785591283
TBC1D10B	4994.71063368908	-0.458469494102966	0.159275799883818	-2.8784629833119	0.00399618176246993	0.122198687765273
ARRDC2	3513.06457919561	1.24938354937735	0.434098580224062	2.87811019499873	0.00400065364755116	0.122198687765273
IGLV7.43	25.1024539701815	4.47261635132274	1.55407463819798	2.87799327097246	0.00400213675889199	0.122198687765273
GALNT9	18.2741941810541	-2.89825263742958	1.00708087942881	-2.87787475329031	0.00400364059421738	0.122198687765273
ANKHD1.EIF4EBP3	173.782578633006	0.668837901208567	0.232409998956262	2.87783616975291	0.00400413027983639	0.122198687765273
CHML	415.132127388139	-1.11846426564908	0.388707439683032	-2.8773935136439	0.00400975217210128	0.122218738648883
CTD.2538C1.3	3.28920289927926	1.75355125836226	0.609502341086208	2.87702136670586	0.00401448411620419	0.122218738648883
CARD10	1523.8840397924	1.34293010992831	0.46700124122973	2.87564569719782	0.00403202014817456	0.122604540283696
POMGNT1	3564.20715561521	-0.726887269914367	0.252855714653288	-2.87471165487031	0.00404396624330543	0.12270222652538
NCAM2	731.860936651106	-2.11503097401189	0.735756752526901	-2.87463345290135	0.00404496787696727	0.12270222652538
ELOVL5	5221.49911864233	-0.578035214971116	0.201155513428383	-2.87357380923547	0.00405856232004896	0.122872290684743
GPX3	28529.7609178934	2.18464976491722	0.76036984164847	2.8731409969929	0.00406412689907412	0.122872290684743
BIRC7	41.1026591408941	2.06781834881418	0.71978626338266	2.8728227447637	0.00406822302038712	0.122872290684743
RP11.353N14.2	2.78970990134042	-2.25449598367469	0.78480603347935	-2.87267921944947	0.00407007151387498	0.122872290684743
RP11.707M3.3	20.9371977544684	0.993662194217636	0.345946643267051	2.87229899048503	0.00407497225023418	0.122873086703234
PRPH2	103.569864666463	2.0667806966942	0.719675496191996	2.87182307530284	0.00408111382433254	0.122876423105077
SLC7A5	1804.25555153601	-0.94890858328816	0.330471244409703	-2.87138018614336	0.00408683675070533	0.122876423105077
PIEZO1	7048.95409423268	-0.820224027844459	0.285730477148907	-2.87062141927899	0.00409665831675473	0.122876423105077
GOLGA6L5P	17.112691958455	1.34571870415405	0.468794682679199	2.87059293519107	0.00409702743489513	0.122876423105077
ACSBG1	11.5272330872114	1.27409975603569	0.443923280223686	2.87008997454175	0.0041035501494037	0.122876423105077
RP11.307L14.2	4.49969662176463	1.49586570371741	0.521367204874204	2.86912120619158	0.0041161403191517	0.122876423105077
RNF26	2642.59101177947	-0.795166285361563	0.277187367364416	-2.86869597601887	0.00412167769688266	0.122876423105077
LIAS	486.791853284527	0.663227493534967	0.231226491420237	2.86830237081096	0.0041268092755109	0.122876423105077
CTD.3252C9.4	387.754266315532	0.896319043470664	0.312505934768578	2.86816646901257	0.00412858242415886	0.122876423105077
RP3.395M20.8	118.719055907309	1.07541603343475	0.374954195118291	2.86812642033642	0.00412910508226355	0.122876423105077
GPBP1L1	4276.41914869741	-0.522653465225398	0.182239573433222	-2.8679471498923	0.00413144539994934	0.122876423105077
TUBB	60113.0716972951	-0.582325237503983	0.203081298450883	-2.86744885888556	0.00413795675157159	0.122876423105077
TTC39A	87.2258462644099	-1.74154589511969	0.607424308953803	-2.86709943847858	0.00414252830910605	0.122876423105077
AGPAT1	3920.50759855729	-0.643260261416171	0.224364011522258	-2.86703851055166	0.00414332591396841	0.122876423105077
DBP	1398.00858375855	1.05878633041306	0.369369108689097	2.86647233216315	0.004150744397225	0.122951779982665
FAM204A	1586.81282132489	0.417021419274054	0.145516159236327	2.86580831615261	0.0041594601744937	0.123065342815302
UG0898H09	2.36321734875901	3.82833391586917	1.33622313379969	2.86504088952785	0.00416955398706072	NA
TNFSF18	53.720149301855	1.77083746252834	0.618183873331021	2.86458048959829	0.00417562019744585	0.123398632986184
TXLNA	7046.42031626506	-0.61405383696062	0.214414695368995	-2.86386078110863	0.00418511908919093	0.123534522248624
RASL10A	36.3577082607171	1.58684596069137	0.554305262110071	2.86276546365577	0.00419961298381466	0.123817361515789
AC020594.5	8.80730650267311	1.38708025296428	0.484612089596727	2.8622485545471	0.0042064688358044	0.123874610295511
RP11.283G6.3	22.4519477937821	-1.52386766236405	0.532780211935686	-2.86021820673025	0.00423349604342365	0.124525050481474
MCM10	498.192460179576	-1.26186966512101	0.441462741797897	-2.85838315591919	0.00425805893695412	0.125101573056806
RP11.307L14.1	23.1338908829371	1.0837998422377	0.379363562069239	2.85688967154914	0.00427814514774007	0.125347510780822
ACRC	73.0454177541452	0.875711825086945	0.306539961026112	2.85676236845463	0.0042798612438575	0.125347510780822
CTD.2339F6.1	175.804437466584	-2.69145399913263	0.942170713302459	-2.85665215563605	0.00428134746042082	0.125347510780822
AC005592.2	11.748119812735	-1.87128368293753	0.65550784176147	-2.854708309681	0.00430763719962871	0.125970903165012
NLGN3	215.608791623239	-1.8354634656041	0.643460092475679	-2.85248997889247	0.00433781801194889	0.126387173391109
PIP5K1A	3508.06794437392	-0.775804566112841	0.271981277917581	-2.85241900491376	0.00433878678359666	0.126387173391109
RND2	300.922966627685	-2.10476006378389	0.737939800744316	-2.85221106336986	0.00434162624712106	0.126387173391109
LA16c.429E7.1	8.21121197086215	1.04012739512082	0.364676876110912	2.85218905627697	0.00434192685483577	0.126387173391109
ZIM2.AS1	5.41924671405559	-2.51952695876286	0.883626362344927	-2.85134878963622	0.00435341867087373	0.12657552232455
DAGLB	1739.1298795974	0.604471882035175	0.212247140406535	2.84796243133065	0.00440001183683763	0.127782832238483
RP5.1042K10.13	5.72073907572333	1.29589136116118	0.45521326680476	2.84677854460903	0.00441640735231796	0.128111388420289
KRT15	22.666688055179	-2.66641800914059	0.936867237506377	-2.8461001755571	0.00442582694391197	0.128237063910498
NPHP4	1643.15794578845	-0.80728113246559	0.283704173463803	-2.84550319654916	0.00443413144016022	0.128330178350814
CTB.75G16.3	9.27614584298081	1.65050200572872	0.580144908555297	2.84498231629554	0.00444138886987165	0.128392810357482
AC010091.1	64.8810081061842	-3.70897655627479	1.30393695736418	-2.84444469138465	0.00444889089047977	0.128424765697307
LINC01239	36.4760864017582	-2.20563141283479	0.775511737553345	-2.84409804008037	0.00445373415155533	0.128424765697307
BTBD7P1	10.9382580667692	-2.27113782631338	0.798625342647415	-2.84380886134246	0.00445777808573247	0.128424765697307
HN1L	3130.70288174123	-0.833351225553234	0.293130784612932	-2.84293315235942	0.00447004448008867	0.128447117271715
AC005740.6	18.9157012074695	1.26901558874218	0.446394787771869	2.84281004954456	0.00447177127852892	0.128447117271715
LINC00865	62.7574399882711	1.37058045983827	0.482247839792575	2.84206656151697	0.00448221325323899	0.128447117271715
FSD1	106.44830100448	-2.54060451946626	0.893956893644081	-2.84197653995359	0.00448347906628146	0.128447117271715
RP11.84C13.2	5.71991200437972	1.56621981504705	0.551109918215266	2.84193726746771	0.00448403138682596	0.128447117271715
AC092670.1	6.42397382151881	1.53799731513122	0.541294588319407	2.84133140866296	0.00449255988142986	0.128463899301398
WFDC3	271.357264600921	-2.15625894687744	0.758932976795835	-2.84117176721062	0.00449480955188168	0.128463899301398
ZFAT	588.884883424478	-0.470833652682874	0.165863031942455	-2.83868953297699	0.00452992080731807	0.129320774304501
CEND1	55.5721485634217	1.6680952101213	0.587842153374794	2.83765837571326	0.0045445794524072	0.129592487371358
RP11.430K21.2	4.09358951421322	1.47927599478398	0.521448937749762	2.83685685729379	0.00455600328096057	0.129771447125937
TRIM71	19.0500258503922	-2.24503545823246	0.791645817251312	-2.83590894982239	0.00456954712076269	0.13001032033881
UPK3B	23.9741618965933	1.37526453965995	0.48516590227565	2.83462735779521	0.00458791667682277	0.130385798860596
SSUH2	26.6184169529331	1.35589330111981	0.478465503385026	2.83383711370453	0.00459927685980273	0.130503554513044
RP11.1072C15.4	6.66251704589985	1.28635390616268	0.453961462822103	2.83361917587874	0.00460241431141288	0.130503554513044
LPHN2	5391.40819572525	-0.946681632436029	0.334147302585896	-2.83312666333039	0.00460951170493294	0.130557945008932
F2RL3	364.620718992295	1.87674612971024	0.662682856123803	2.83204267677573	0.00462516751053497	0.130854346358659
ACOT1	122.755931436644	-1.06489236009339	0.376140855430523	-2.83109995821789	0.00463882214012506	0.130976862931907
PRG4	20705.091912431	-2.55234725706844	0.901694125203684	-2.83061315996918	0.00464588735939036	0.130976862931907
VPS33B	971.508715125667	0.46956642006709	0.165919201031907	2.83009089452395	0.00465347817012877	0.130976862931907
MIR126	6.41928565474079	2.08883007958247	0.738178084929221	2.82971023148533	0.00465901794942729	0.130976862931907
RP1.228H13.5	214.562675391273	-0.996736948084636	0.352252034312081	-2.82961303553911	0.00466043339613402	0.130976862931907
PDK4	7115.2819935179	1.87918291877565	0.664126514310333	2.82955563177161	0.00466126953952085	0.130976862931907
SERINC2	823.787274931332	-1.84635204443306	0.652596463651136	-2.8292400392474	0.00466586888737118	0.130976862931907
RP11.159D12.11	2.38216671757896	1.97903756183871	0.699562901541531	2.82896299600475	0.00466990981620899	NA
NRAS	3328.93138890259	-0.632201993272782	0.22351112194134	-2.82850351151073	0.00467661880336668	0.131132599327327
UBAP1L	152.136816868866	0.829554894599027	0.293329359181133	2.82806636510862	0.00468300972834661	0.131155837888134
CTD.2012K14.6	5.73276344472489	1.35431922330996	0.479000544704589	2.82738555995839	0.00469297860460245	0.131155837888134
CD1C	244.810829651351	2.23230107515485	0.789529838971632	2.8273802521035	0.00469305640174139	0.131155837888134
EHMT2	3855.23379391038	-0.521820059729112	0.184606111855889	-2.82666729981544	0.00470351674821263	0.131209102852611
PRR22	91.2173436192349	1.18961640019707	0.42089535305329	2.82639471205199	0.00470752169596651	0.131209102852611
MYCN	34.1537917488058	1.84219351997858	0.651830047914094	2.82618686553917	0.00471057751831217	0.131209102852611
GPATCH1	849.614241914158	0.752533699093325	0.266399925678448	2.82482698588157	0.00473061522793871	0.131621797644458
ERCC6.PGBD3	4.87097720237791	-1.36259169874089	0.482435547042183	-2.82440153320988	0.00473690006272269	0.131651352570136
RP11.649A18.12	78.5587342340908	-0.997913173754737	0.353437730927938	-2.82344833737686	0.00475100822147493	0.131836675331207
PITRM1	3618.45676938063	-0.839193920022562	0.297244492060588	-2.82324464350885	0.00475402800206552	0.131836675331207
ASIP	17.8344650378346	1.71389744439815	0.607255091748151	2.82236817391555	0.00476704157484249	0.132003926519202
RPS27P29	5.33406460493092	2.12067475923107	0.751467891855555	2.82204307358311	0.00477187676393163	0.132003926519202
RP1.69D17.3	3.51151412907399	1.5355265410398	0.544218956298201	2.82152343880947	0.00477961446450284	0.132003926519202
CALCA	12.4097336195837	-3.33092430211995	1.18059199457666	-2.82140173524924	0.00478142835020379	0.132003926519202
LINC00431	4.585459965958	2.93844047371867	1.04160164006267	2.82107896214706	0.00478624201993615	0.132003926519202
HSF1	4529.07629184885	-0.753662160496635	0.26722349195869	-2.82034395618609	0.00479721988353777	0.132057318666546
C10orf90	27.1157882653342	-2.75542409626001	0.977038358599122	-2.8201800594715	0.00479967090827964	0.132057318666546
SORD	766.867628154359	-1.24805239500682	0.442652281295278	-2.81948709572851	0.00481004649652306	0.132057318666546
TMTC4	660.323284595754	-0.902337527535677	0.320041329397554	-2.81944063047807	0.00481074293567038	0.132057318666546
REP15	16.2666543893487	-1.43316731179071	0.508383270171709	-2.81906859623183	0.00481632241973055	0.132057318666546
LAMC2	1580.36405360649	1.88659237591391	0.669284237182026	2.81882087027371	0.00482004087037523	0.132057318666546
MSANTD1	15.8223495363672	1.26893340101054	0.450215729911809	2.81850081350803	0.00482484887701876	0.132057318666546
APOD	3245.12345394895	1.90275484764436	0.675348300724887	2.81744226734862	0.00484078166093566	0.132349700768835
SLC25A28	1731.8932727089	0.516808359577478	0.183532409888402	2.81589698458014	0.0048641260729325	0.132843867872679
CTD.2007H13.1	2.54010454875962	2.19908982144391	0.780962246379219	2.81587212652028	0.00486450243177309	NA
SSMEM1	2.19012699736828	1.92862007314633	0.685158435025016	2.81485270348589	0.00487995952918147	NA
RP11.254F7.4	1.85995747193661	-2.122952172388	0.754288936436618	-2.81450790252495	0.00488519765309958	NA
HBB	421.024550031951	1.654720408854	0.587948318723784	2.81439772197287	0.00488687255858555	0.133320653091801
RP11.191L17.1	10.6051076266036	-1.45873107470067	0.518573326583243	-2.81296973816973	0.00490862704414954	0.133540401220376
SPIC	4.82897702010529	2.77102826403813	0.98513402218828	2.81284393963254	0.00491054770232277	0.133540401220376
CHRND	18.6411295998344	-3.3876918298755	1.2044087205131	-2.81274269454996	0.00491209397864165	0.133540401220376
ZFP36L2	15035.7944404467	0.863585583596596	0.307054903523457	2.81247937644684	0.0049161175949107	0.133540401220376
WNT5A	722.506271619383	-1.25682733443161	0.44700078845512	-2.81168930098609	0.0049282081928873	0.133724727800111
RP11.158H5.8	13.117562582915	1.47062221318745	0.523138336585251	2.81115359043812	0.00493642151472177	0.133790212608029
GS1.393G12.14	6.77363066877532	-1.32974287316121	0.473076700819509	-2.81083991424161	0.00494123643042187	0.133790212608029
CDH15	78.0870597458424	-2.35935615940754	0.839596936234544	-2.81010572762315	0.00495252277226909	0.133874525873274
MTERF2	466.10624737811	0.829831580562269	0.295360439003381	2.80955561740877	0.00496099465848939	0.133874525873274
LBX2	159.643661610037	-1.27200489028782	0.452782397024042	-2.80930729341114	0.00496482322498236	0.133874525873274
FFAR3	5.66557780567085	1.97239234792234	0.702104542573957	2.80925735174912	0.00496559352949504	0.133874525873274
ZC3H18	2713.46705724303	-0.555223148047986	0.19768983973354	-2.80855682212274	0.00497640995582141	0.134022801459771
BBIP1	621.450588428905	0.509018377005148	0.181283316677669	2.80786112221351	0.00498717289174649	0.134126650243143
PPP4R2	2447.87298029267	-0.509279767915115	0.181403581668253	-2.80744053249441	0.0049936898968696	0.134126650243143
SLC23A3	26.2509729311846	1.2647473797856	0.450547242067908	2.80713599306635	0.00499841351728215	0.134126650243143
OGDHL	27.7060064694628	-3.1465601824467	1.12099543789095	-2.80693397679358	0.00500154916012988	0.134126650243143
LINC00304	7.68150594880523	1.80278277471753	0.643934571770266	2.79963656829518	0.00511601704123054	0.136770535463585
UGGT2	1262.99246219631	-0.784238153395865	0.280147533121111	-2.79937554565875	0.00512015498387438	0.136770535463585
RP11.697E2.6	8.38360917773608	-1.19251938926539	0.425997878627902	-2.79935522943537	0.00512047717998142	0.136770535463585
VGLL2	174.308202637974	-3.07651090584757	1.09904074377682	-2.79926920204545	0.00512184169619266	0.136770535463585
KRBA2	29.010928400089	-0.919253320461257	0.328473386227914	-2.79856255941364	0.00513306249174786	0.136920496861084
GUCY1B2	7.07247429816536	2.2560765060941	0.806250729770153	2.79823189336804	0.00513832077239708	0.136920496861084
LINC00704	142.715234412089	-2.03628596101994	0.728137044816761	-2.79656965061074	0.00516482772130857	0.137481496513988
MRPL54	1686.30072757265	0.674859445026254	0.241377398863118	2.79586841272143	0.00517604702161723	0.137595782944113
CTD.2313J17.5	14.1104188227488	0.97901775874911	0.350197095890302	2.79561929621422	0.00518003800436224	0.137595782944113
GPR63	39.9316777380106	-1.95914362619475	0.701005707249516	-2.79476130641174	0.00519380475980969	0.137789469251116
TPBG	5339.15583947858	-1.77516828562841	0.635240104438467	-2.79448396476417	0.00519826187154125	0.137789469251116
LRRC18	24.0885262776487	-3.65385756562644	1.3078432737935	-2.79380384396378	0.0052092066132255	0.137821049966918
C14orf1	1390.040239566	-0.698000083930481	0.249845173619665	-2.79373050845095	0.00521038799660715	0.137821049966918
PRKAG1	2657.88503289643	0.426856362074098	0.15282587659335	2.79308957088405	0.00522072335625537	0.137949679627343
NTRK1	197.301971859118	1.44617471047572	0.51790151334281	2.7923739808006	0.00523228439713164	0.138110392756957
RP11.10C24.2	12.0488176084348	1.1751432242589	0.42121617650285	2.78988151408508	0.00527273338015715	0.138918475107906
RP11.778D9.12	8.65177400310919	-0.898307251396218	0.321996009919545	-2.78980864272409	0.00527392021097532	0.138918475107906
CGNL1	3148.64493432105	-2.34112291772706	0.839321037336222	-2.78930565729312	0.00528211874513813	0.138989195540127
MORC2.AS1	9.43800619000962	1.38326467593167	0.496099765162413	2.7882792395171	0.0052988848187488	0.139010333077331
TRIM37	1724.02782976617	-0.743309420660028	0.266587940391983	-2.7882334796056	0.00529963340436181	0.139010333077331
RGS2	2551.03425576123	-1.37135061069189	0.491877411710357	-2.78799265435553	0.00530357463489893	0.139010333077331
MIR6757	2.02070765218135	2.11377612193065	0.758240570329839	2.78773809348021	0.00530774353400346	NA
CYP2C8	25.494013832719	2.5660623592286	0.920499565102454	2.78768448841471	0.00530862179198175	0.139010333077331
BEND3	215.01139514237	-0.790397193568456	0.2835434219878	-2.78757020010313	0.00531049471411732	0.139010333077331
ENSG00000280502	7.35683113219115	-1.16640622773715	0.418556436535221	-2.78673585190226	0.00532418585086514	0.139122390651281
ENSG00000202533	7.33206418404487	1.38553384712003	0.497206472007837	2.78663678999375	0.00532581351073017	0.139122390651281
HMHB1	9.07395107941287	2.04609018970108	0.734539065143274	2.78554305250189	0.00534381431541071	0.139339768916602
PHKB	2863.80774733917	0.529434814971768	0.190100266838527	2.78502930993503	0.00535228847481761	0.139339768916602
PSMA6P2	2.11186395838843	3.22203584716405	1.15694324116845	2.78495584961451	0.00535350119050897	NA
ENSG00000200534	30.1620966948795	1.21476146701763	0.436203038056876	2.78485329315665	0.00535519465321257	0.139339768916602
GOLGA8B	124.217651034931	1.47644152401914	0.530269491062214	2.78432296955571	0.00536395933825259	0.139339768916602
TFDP1	4771.60292127266	-0.850798251047844	0.305570331419986	-2.78429599854863	0.00536440543540207	0.139339768916602
RP11.1007O24.2	11.3981233388493	1.04810175186328	0.376456968425104	2.78412100126074	0.00536730068303793	0.139339768916602
SLC22A3	624.668027340631	-2.86919287735275	1.03069771363254	-2.78373847094384	0.00537363438067648	0.13936067434989
PGAM1P5	7.4879584833399	1.89970763351716	0.682942953115871	2.78164907456751	0.005408348553615	0.140029845943056
CKAP5	7893.90950771679	-0.843656988531276	0.303308209315992	-2.78151715851627	0.00541054704651448	0.140029845943056
RP11.325L12.7	3.58204815864325	1.80022150875304	0.64743086957322	2.78056174544122	0.00542649391494065	0.140048722403398
TEX19	7.07468796446555	1.95731203495134	0.703934242569547	2.78053249378326	0.00542698282524143	0.140048722403398
RP5.1120P11.1	23.3721453394978	-1.78934209034689	0.643538272600115	-2.78047501839687	0.00542794358093145	0.140048722403398
LFNG	1154.58846291425	1.22207429933428	0.439676100942296	2.77948766538636	0.00544447211831878	0.140221346303738
BTG1	8088.98043367796	0.824240697900267	0.296552301747259	2.7794108932688	0.0054457592046715	0.140221346303738
RP11.481J2.2	10.0116471925688	1.56197798068184	0.562054382442904	2.77905133288505	0.00545179089941113	0.140233413257506
KLHL31	23.3556414121008	-2.0469856818866	0.736824749267028	-2.77811743419706	0.00546748541403982	0.140464076246077
ZNF224	635.002878209086	0.770553492388779	0.277391543591827	2.77785502186262	0.00547190268460995	0.140464076246077
ETV1	2394.58467745946	-1.80733193870569	0.651031552720635	-2.77610498470146	0.00550144408953748	0.140732451282599
CTD.3131K8.3	6.43345169737788	1.11435165744615	0.401445104120132	2.77585066054931	0.00550574915297067	0.140732451282599
RP5.1165K10.2	21.7918478728818	1.1074959259072	0.399025236473928	2.77550346362506	0.00551163122583981	0.140732451282599
JPH3	21.4259555823698	-2.18308466744438	0.786555053043284	-2.77550142103561	0.00551166584735659	0.140732451282599
RP4.794H19.1	71.2530325338301	-1.23257802993012	0.444159996942356	-2.77507663548116	0.00551887015093281	0.140732451282599
PODNL1	249.680082840902	-1.8733857546008	0.675109571785326	-2.77493585174127	0.00552125969786576	0.140732451282599
IGSF23	5.48967249039918	2.40150696864606	0.86543118704228	2.77492538355766	0.00552143741345964	0.140732451282599
GRM1	42.0951285832014	-1.63559216492574	0.5895640977367	-2.7742397666423	0.00553308819875248	0.140828986917502
HSD17B6	96.8515954523212	1.44140956141301	0.519605647161624	2.77404521926732	0.00553639820831657	0.140828986917502
KCNK15.AS1	38.6787493473659	1.25497331231104	0.452507991657105	2.77337270379528	0.00554785408894114	0.140978130921399
NAPB	680.846524282676	0.722590208258224	0.260682213847939	2.77191986976037	0.00557267525984289	0.141446067655773
C5orf58	26.5483944109819	1.80733490432834	0.652081716246072	2.77163867549127	0.00557749092549341	0.141446067655773
ACTBP12	2.08997235625919	2.10434645772301	0.76005025925144	2.76869382268949	0.00562814981113337	NA
CREG1	7607.04059049785	1.09858483219778	0.396850617292579	2.76825783891335	0.00563568500468865	0.142512100484657
CNIH2	111.909525211379	-1.56139525790765	0.564119487643798	-2.76784491957413	0.00564282996134407	0.142512100484657
SNORD56	3.37413475087131	1.49994512335053	0.54193539684103	2.76775632684964	0.00564436399131813	0.142512100484657
SNORD56.1	3.37413475087131	1.49994512335053	0.54193539684103	2.76775632684964	0.00564436399131813	0.142512100484657
KRT23	3.42622284216606	2.26086585014548	0.816928516692492	2.76751980613809	0.00564846131585482	0.142512100484657
PERP	686.74186916559	-1.98523447251445	0.717492078790109	-2.7669078603099	0.00565907470482435	0.142512100484657
LINC00689	3.08613125087971	2.39650660882441	0.866367874776595	2.76615359202046	0.00567218123774232	0.142512100484657
ENSG00000274051	9.37003233464745	0.979412828552889	0.354086208257548	2.76602930504569	0.0056743435343588	0.142512100484657
FAM131A	1162.62160865869	-0.79121629998939	0.286077483378764	-2.76574126227832	0.0056793576493629	0.142512100484657
RP1.228P16.8	26.0161241046273	1.10876788748509	0.400914277892394	2.76559840501038	0.00568184592472341	0.142512100484657
AKIRIN1	2100.18029101357	-0.730185888766045	0.264051987900612	-2.76531108351618	0.00568685344319117	0.142512100484657
DUSP5P1	16.3267433916986	-1.93292251845126	0.698996636997354	-2.76528157095923	0.00568736802156317	0.142512100484657
AP001476.2	13.3934430847053	-2.47430454630166	0.894957220321964	-2.76471823470123	0.00569719835854813	0.142584885390234
PGM1	5469.59345108621	-0.928929208611458	0.336059930675969	-2.76417723095688	0.00570665341142505	0.142584885390234
CAPN9	5.52849062506048	2.01401269557209	0.728736527015655	2.76370487948496	0.00571492020720623	0.142584885390234
PSMD10P1	4.17137545913322	1.28275305866511	0.464192846942811	2.76340548354711	0.00572016563581326	0.142584885390234
PLAC8L1	12.9762592693163	1.08246732702851	0.391757627650153	2.76310466121969	0.00572544042751599	0.142584885390234
WASF1	1151.42681505475	-0.961962707363501	0.348157793400882	-2.763007824604	0.0057271393495176	0.142584885390234
ENTPD5	965.469999027174	-0.778243505575795	0.281681173027858	-2.76285240227549	0.00572986706205597	0.142584885390234
IFT88	615.72920832762	-0.608903834366956	0.220453031122254	-2.76205698450698	0.00574384525302753	0.142791766408598
FAM161B	421.903064302554	-0.711028682735672	0.257511909132914	-2.7611487372752	0.00575984383861748	0.142933044833845
MDGA2	18.4312326977198	-2.6542887608238	0.961318950959654	-2.76109064340624	0.0057608685159944	0.142933044833845
LINS	584.681734299613	0.358212589217004	0.12978287240507	2.76009139402442	0.00577851933024421	0.14323000518859
PQLC2L	69.5907558894665	2.44919249055054	0.887578023387364	2.75941092052213	0.00579056715870192	0.143387639426874
TRAPPC9	1651.38229183098	-0.7921634045039	0.2871723453693	-2.75849474114643	0.00580682394902805	0.143649085482924
YWHAZP5	30.6615719594211	-0.935612248663724	0.339285721866317	-2.75759393444905	0.00582284807209311	0.143854253665586
RBP4	336.002427272925	-2.72556710776547	0.988531387436534	-2.75718823135543	0.00583007798865944	0.143854253665586
ADAMTS4	3626.23339645914	-1.20490023643868	0.43705472776505	-2.75686352279069	0.00583587035492247	0.143854253665586
SETD5	4894.40475139003	-0.583022891166284	0.211510790616675	-2.75646878093755	0.0058429190081617	0.143854253665586
TCERG1L	14.3950779117422	3.43363567647854	1.24568315012298	2.75642780922223	0.00584365105337829	0.143854253665586
HMGN2	15845.4853319903	-0.784234435835617	0.28455243699306	-2.75602783136503	0.00585080183723664	0.143889768500548
TLK2P1	14.8914993670121	-0.964438801185325	0.349981867023089	-2.75568219973436	0.00585698737410329	0.14390149875867
RP11.481H12.1	14.807048631043	2.81409206263566	1.02137494181263	2.75519982665865	0.00586562993512395	0.14397351451276
USP41	3.06647606478857	-2.51394262042205	0.912631641795251	-2.75460821791894	0.00587624533920255	0.144093767033675
PCDH15	59.7891092970985	-3.18720246327043	1.15755067507356	-2.75340210316744	0.00589794065461365	0.144485216736152
MGAM	17.4620828066517	1.55207182905779	0.56394185599257	2.75218413488046	0.00591992242490706	0.144837360785677
ZNF670	4.8453709572103	-1.18417595586506	0.430301289708703	-2.75196933912677	0.0059238066871641	0.144837360785677
LINC01481	7.10803659782099	1.464866887031	0.532393777461115	2.75147259236701	0.00593279841420397	0.144916649636874
KIAA0319	17.1726821510047	-1.34341333264487	0.488408636384834	-2.7505929104545	0.00594875192054781	0.145165671261538
CTD.3222D19.12	43.9712887469324	0.899201079681806	0.327038718289505	2.7495248403151	0.00596817390689497	0.1453526868442
CYP4F11	5.99486815765345	2.10783554386945	0.766763014413293	2.74900523922937	0.00597764307412872	0.1453526868442
SUSD4	107.543287534368	-1.85028254036084	0.67319061778611	-2.74852692755252	0.00598637175087468	0.1453526868442
RP11.337C18.9	58.0903108481116	-1.36448990897457	0.496458456276941	-2.74844731059111	0.00598782578969879	0.1453526868442
RP11.197N18.2	27.2468655602623	0.776385339408231	0.282512203666326	2.74814797142433	0.00599329544707519	0.1453526868442
N4BP3	549.012066360446	1.42741508697478	0.519442682262904	2.74797419564441	0.00599647281972102	0.1453526868442
ZFPM1	312.080493520711	-1.13015567600063	0.411271166001609	-2.74795747775862	0.00599677857497493	0.1453526868442
RP11.813P10.2	3.39030866126343	1.32091070978883	0.480827380411965	2.74716200366355	0.00601134333389913	0.145469461215391
MAZ	4125.4416660989	-0.577385741868199	0.210182841671072	-2.74706411464255	0.00601313783665653	0.145469461215391
COX7B	4074.91161569687	0.670516092052913	0.24415355800821	2.74628843225936	0.00602737472934706	0.145561962022155
PRSS50	7.22722114988613	2.26601220213916	0.82513663519141	2.74622663143966	0.00602851032811526	0.145561962022155
MUSK	15.0758579512155	-1.46375806006734	0.533430635826489	-2.74404573295536	0.0060687082714241	0.146364009994338
PAX8	309.688652920203	1.52792605883758	0.556865911131252	2.74379528050776	0.00607333998945087	0.146364009994338
ZNF697	584.989978913369	-1.05546271894867	0.384735146231441	-2.74334884474981	0.00608160400307908	0.146396009039258
RP11.214O1.3	4.06233096298082	2.23953201988719	0.81646039005472	2.74297693699151	0.00608849615405233	0.146396009039258
RP11.226L15.5	261.198131523069	0.743908362990383	0.271223908260282	2.74278314091871	0.00609209034759526	0.146396009039258
TBX3	1954.92601427139	-1.51018996438418	0.55091288245774	-2.74125004600891	0.0061205909599859	0.14684564387688
CMAS	1581.90786882021	-0.603273491126912	0.220080424787656	-2.74115015776154	0.00612245206738339	0.14684564387688
ACSM4	11.9675048584382	1.34885459952194	0.492165346451619	2.74065333784026	0.00613171633814612	0.146925831806291
RNU6.945P	3.21711026818581	1.40087265251218	0.511202826118491	2.74034606410309	0.00613745243145129	0.146925831806291
RAB40C	1388.25713931255	-0.466545115669573	0.170388625857741	-2.73812358847882	0.00617908502122754	0.147586486631568
LINC01143	4.00620906261904	-2.74286364190037	1.00179349416083	-2.73795313893307	0.0061822884475035	0.147586486631568
RP11.113K21.4	8.05997239238456	1.45899416569464	0.532881066853579	2.73793582930116	0.00618261384810125	0.147586486631568
RBFOX1	67.7253105741887	-3.3984527242754	1.2414509416638	-2.7374845112452	0.00619110353846614	0.14764932639324
QTRT1	2146.31266726448	0.546971366993451	0.199881831356207	2.73647366187425	0.00621015660156701	0.147963731202553
PLA2G2D	357.319118252176	3.07414770936627	1.12363285872322	2.73590050833812	0.00622098316277542	0.147993182653601
OSTN	6.5023800437648	-2.8573376445026	1.04469615065583	-2.73508966478804	0.00623632858596857	0.147993182653601
HOXD4	38.4164725319343	0.97883986750728	0.357884436300116	2.73507246536545	0.00623665445824787	0.147993182653601
RP11.262H14.5	3.50346044830738	-2.19421353601014	0.802262928228963	-2.73503044800286	0.00623745061303192	0.147993182653601
VIPAS39	1600.32990124691	-0.433604406462518	0.158547405474224	-2.73485652550153	0.00624074711047198	0.147993182653601
CTC.281F24.3	4.03100346117967	2.03828758815071	0.745407271751002	2.73446163647245	0.00624823759384496	0.148031553821094
SLC44A5	53.6086252229587	-2.03656459259588	0.745113884338598	-2.73322593418541	0.00627172942802042	0.148448596639943
KLHL10	3.90648388364952	1.84884911831958	0.676809966158901	2.73171083577914	0.00630064132581664	0.148993026774096
DHDDS	2249.74082968308	-0.537887565406319	0.196980046926326	-2.73067030798048	0.00632056664673586	0.149257315227984
JAK2	1666.2820536081	-1.10654104054555	0.405250823088669	-2.73050905143613	0.00632365965818338	0.149257315227984
CDRT4	23.333111000855	1.18127890374546	0.432763356915293	2.72961858916507	0.00634076388068037	0.149521025167625
AC090181.1	8.99185582909507	1.52281736706921	0.558060180605137	2.72876908260669	0.00635712021112721	0.149766622693546
UPF3AP2	7.26816467386556	-1.12332400219749	0.411831934283219	-2.72762723986569	0.00637916497416481	0.149942362394826
GS1.124K5.10	30.0508940875426	1.16049728049148	0.425464630919754	2.72759988999029	0.00637969384171342	0.149942362394826
HMX3	21.6056464317781	-3.46878879360411	1.27184983460144	-2.72735719204707	0.00638438864731046	0.149942362394826
SDPR	3113.41998013679	1.58477418372825	0.581109726222487	2.72715136611136	0.00638837262821496	0.149942362394826
RNF5	2193.55596908631	-0.672814972736432	0.246741111621343	-2.72680530745502	0.00639507600597403	0.149960070659157
CBFA2T3	533.882344856817	1.78369157503078	0.654293340928071	2.72613438568813	0.00640809022322097	0.150001989424607
GIN1	233.007291037517	0.556533753587969	0.204150187572428	2.7260996436289	0.00640876478143058	0.150001989424607
RP11.798M19.3	11.7557656495423	-1.08209693401116	0.396991314235837	-2.7257446075214	0.0064156618912655	0.150024123334899
MTTP	22.4814759730818	-1.6294725434416	0.59791020162495	-2.72527971426672	0.00642470323905503	0.150096310704448
ARAF	5103.75539758896	0.497639751944534	0.182662695014625	2.7243644461979	0.00644253708627525	0.150373587843358
PPM1E	44.9300351346463	-1.47784883908776	0.542662341042676	-2.72333037934456	0.00646273928158841	0.150705579842998
RP11.29B2.6	8.59746358560538	1.5533057064415	0.570526515553034	2.72258284952071	0.00647737897603618	0.150758053053437
MEX3C	1933.21926188636	-0.583468191323916	0.214311643600993	-2.7225221248838	0.00647856952215021	0.150758053053437
ABCC4	679.297059912148	-1.44981941031759	0.532625584042038	-2.72202360111032	0.0064883508497549	0.150758053053437
RP11.556N21.1	3.29627862363042	2.1855106088782	0.802955861237631	2.72183156557271	0.00649212224196339	0.150758053053437
NYAP1	92.6189027512974	1.62544394875587	0.597218493827309	2.72169057983975	0.00649489232053444	0.150758053053437
MAEL	7.01192807489516	2.87847782860844	1.05799408058969	2.72069369897049	0.00651450932679517	0.151074288049542
RP11.396B14.2	12.5452296704834	1.69141474837547	0.621973193903997	2.7194335141018	0.00653938399064349	0.151395886756961
TRIP13	964.050053232272	-1.15255851827731	0.423869562448384	-2.71913489522538	0.00654529090433958	0.151395886756961
C15orf61	820.057137063107	1.30844488738464	0.481208831489702	2.71907912274599	0.0065463946590403	0.151395886756961
RASSF8	1960.46220570855	-1.11274647582037	0.409485669043845	-2.71742471090293	0.00657921221047954	0.152015381669815
CTB.113P19.5	37.6069050464277	1.02439527888182	0.377019691622782	2.71708693642122	0.00658593059368412	0.152031262276181
ZBED4	1147.41713184344	-0.774237533321536	0.284986289520609	-2.71675361865276	0.0065925663793575	0.15204520886628
RP11.449J21.5	4.66367946744357	1.48055060281628	0.545201570125063	2.71560223584217	0.00661553471776079	0.152435465416192
MAGI3	753.481034232542	-0.939143315404852	0.345902852009961	-2.71504935546992	0.00662658939141095	0.15247974437293
MYO1D	3217.87252435507	1.81268798755829	0.667681009221972	2.7149012215737	0.00662955410317085	0.15247974437293
RP1.155D22.2	4.26433302696819	-2.59413261372627	0.955658778773375	-2.71449671299618	0.00663765590423703	0.152526918900644
PART1	76.8341179508759	-3.33184421217572	1.22765398259193	-2.71399291609942	0.0066477587734326	0.152619948233779
RCL1	602.179785247852	-0.930877722929741	0.343048533521592	-2.71354526245526	0.00665674737411085	0.152687250051489
PKN2	2448.16357101384	-0.513778032696718	0.189430259162599	-2.71222789309343	0.00668326274065943	0.153156079242312
TRIM63	30.5722290283851	-1.69907263326995	0.626582139644451	-2.71165187414068	0.0066948863734283	0.153228043555086
ITIH5	2012.54938068462	1.73454555239772	0.639741407151112	2.71132293925131	0.00670153218305141	0.153228043555086
DDX10	1515.98922592369	-0.95168479046707	0.351033947452897	-2.71109047250985	0.00670623252343423	0.153228043555086
HN1	3547.99231330974	-0.874477333349165	0.322581945389337	-2.71086880666469	0.00671071723598918	0.153228043555086
RP11.554E23.4	8.53216503739382	1.08224780053764	0.39928813354541	2.71044318529581	0.00671933590681812	0.153285990533096
RP11.326I11.5	11.6914055345143	1.04439212046694	0.385381919509487	2.71001847153658	0.00672794611552065	0.153343639855375
HGS	4758.71491480557	-0.522633139180251	0.192931983334615	-2.7088983907547	0.00675070106251712	0.153534043354254
RP11.783K16.14	5.88784611367679	-1.10628483263396	0.408513906925111	-2.70807141172005	0.00676754587831038	0.153534043354254
CTD.2240J17.2	4.9057602143499	1.62691471832155	0.600812525846025	2.70785752349393	0.00677190873240141	0.153534043354254
RP11.817I4.1	65.2649865663853	-0.912816657063055	0.337130927690526	-2.70760283939594	0.00677710703028784	0.153534043354254
FAM134B	367.29857596382	1.87927140422435	0.694076848089647	2.70758405124273	0.00677749065291084	0.153534043354254
AC002310.12	63.3944775495008	-1.01404599240438	0.374532539987722	-2.70749770483926	0.00677925395281534	0.153534043354254
INCENP	1615.70554944433	-0.960534428150468	0.3547734338748	-2.70745872276739	0.00678005014980713	0.153534043354254
CACNA1F	17.6715937227866	1.50607826341743	0.556320108315322	2.70721521819194	0.00678502555921293	0.153534043354254
SAMD11	384.720787875284	-2.27323757717871	0.839815258434528	-2.70683052534218	0.00679289248604976	0.153573831620365
PLEKHG4B	129.001678218051	-2.50071696681881	0.923962339872541	-2.7065139550642	0.00679937246090549	0.153573831620365
RP11.178L8.7	18.8812630428507	-1.3194641354278	0.487564275674066	-2.70623628772559	0.00680506069184179	0.153573831620365
LIPJ	4.48478961552935	1.50935816114406	0.557883167709872	2.70550941219472	0.00681997155621884	0.153772668147732
CCDC106	932.281812598537	-0.915788699879492	0.338596077553784	-2.70466423148102	0.0068373462009724	0.153920361658457
PIGV	767.898885681097	-0.531694991532244	0.196589373228583	-2.70459680907583	0.00683873393595175	0.153920361658457
ZNF154	82.1184146045203	1.17098213851498	0.433255893523918	2.70274947442887	0.0068768556660642	0.154640301186571
SPPL3	3802.30556040852	0.567648875538422	0.210064641810458	2.70225807944687	0.00688702822329592	0.154731022685244
TRBV4.2	30.6539731404564	2.83702467761225	1.0503647291232	2.7009900456011	0.0069133407626907	0.155183877066703
CTD.2297D10.2	5.86975042335457	2.50814309589696	0.928709228639313	2.70067639962158	0.00691986303951434	0.155192088523201
RP11.380O24.1	5.23685456509285	-1.09616345318768	0.405935021489931	-2.70034216107878	0.00692681962267135	0.155210016931822
AP3S2	1458.98998507157	0.520032153934245	0.192668386008457	2.69910474005538	0.00695262906396829	0.155649976416086
ARHGAP39	498.778363466594	-0.953865960581247	0.35346584239525	-2.69860859572004	0.00696300160405538	0.155743872613157
EXOC2	1772.82287697536	-0.671492843542556	0.248929044074242	-2.697527104721	0.00698565975866126	0.156112155315898
DSG3	11.2637004130194	-3.1833532163976	1.18055946205553	-2.69647850761784	0.007007691965369	0.15633099054681
POU6F1	713.992034731297	0.841635795291879	0.31212495020788	2.69647073946295	0.00700785541565756	0.15633099054681
PPFIBP1	4465.81500852798	-1.13799933973022	0.422148790333885	-2.69573042914597	0.00702344805640102	0.156436883941145
COMP	172.815510617192	-2.5268223435493	0.937368191882161	-2.6956561631088	0.00702501398847097	0.156436883941145
RPL13AP7	34.8212787787135	0.869914369539568	0.322849126053366	2.69449194480946	0.00704960305947323	0.156773466380954
TNFRSF4	933.668254164466	1.51506689677229	0.562370464746763	2.69407266516838	0.0070584774372405	0.156773466380954
AGBL4	6.32397236003181	-1.87747407040152	0.696938909987258	-2.69388614051674	0.00706242859861935	0.156773466380954
TIAL1	3228.75521015343	0.289798203914381	0.107581599703986	2.69375250704367	0.00706526058439773	0.156773466380954
MASP1	148.586772745829	2.1129852866661	0.784599528698679	2.69307488645916	0.00707963654799855	0.156773466380954
NUP210P3	5.38688464083552	1.22628371823052	0.455399313676747	2.69276584615356	0.0070862016650014	0.156773466380954
ARRDC1.AS1	562.702042914082	-0.632500580898761	0.234898677231484	-2.69265279972375	0.00708860453899757	0.156773466380954
IL17B	45.8898471771223	-1.86195971581473	0.691511833278691	-2.69259270226302	0.00708988224667914	0.156773466380954
SRF	3122.83118545878	-0.571170472570699	0.21216924572179	-2.69205120010491	0.00710140423262042	0.156837134909844
SBK1	195.052718921219	-1.91212437983414	0.710332381904521	-2.69187274654072	0.00710520501694071	0.156837134909844
ELMOD1	28.7041350688493	-2.17090673225044	0.806570807719864	-2.69152653613572	0.00711258397095541	0.156862656815262
RP11.20I20.4	121.634227377247	1.72831715042489	0.642261436953844	2.69098695793111	0.00712409798626189	0.156935753539501
HNRNPCP2	409.36450271287	-0.679588847440602	0.25256128307777	-2.69078791158715	0.00712834964307872	0.156935753539501
LTBP1	16748.6035225432	-1.32533466346499	0.492656424268565	-2.69018041413483	0.00714133995976313	0.156999999573164
AGO1	2125.97861456	-0.411758560595496	0.153066169382285	-2.69006902215683	0.00714372419511342	0.156999999573164
RP11.43F13.3	27.2706359718892	2.47012551722695	0.918424758964306	2.6895240934189	0.00715539815830061	0.157065023569504
HIF1A	9509.22341151252	-0.795972530267254	0.295996611329367	-2.6891271717349	0.00716391215518079	0.157065023569504
ING1	1009.74488942191	-0.688164184950055	0.25591263807197	-2.6890590091003	0.00716537516284236	0.157065023569504
KCNK5	587.069491614121	-1.38338859758088	0.514777989517468	-2.68734993677102	0.00720214558461407	0.15773387132663
ARL6IP4	132.781498754639	0.949112142697312	0.353274031743431	2.68661734918183	0.00721795888127704	0.157899993570904
ZDHHC20	3903.80693166552	-0.886757403941476	0.330123143689732	-2.68614128058498	0.00722825177522545	0.157899993570904
CTD.2527I21.14	11.9512020395835	0.993013479892804	0.369682008643559	2.68612877195831	0.00722852239689079	0.157899993570904
MAGEF1	2132.54199503344	-0.65829024573097	0.245137644021978	-2.6853902767865	0.00724451571858968	0.15804864309178
PRR13	3097.15372372205	0.600992240839395	0.223824075686131	2.6851098971237	0.0072505961112502	0.15804864309178
USP28	1044.08997289959	-0.652579485448948	0.243051185715662	-2.68494672645778	0.00725413678424267	0.15804864309178
IGBP1	4207.67551765868	0.762372753200931	0.283980894488681	2.68459170316234	0.00726184586705605	0.158079974625863
PPP1R3D	509.832976984098	0.487927668096233	0.181787123362555	2.68406066981496	0.00727339060799028	0.158194676830215
AL133243.4	2.57127288571409	1.77018165008095	0.659686222965162	2.68336913589665	0.00728844934163155	NA
TARBP2	1335.71076402719	0.549912680648521	0.20493680827884	2.68332802324267	0.0072893454847081	0.158405018084932
PPP1R27	7.4292487682051	-2.33622616664915	0.870816469272694	-2.68279970474188	0.00730087018050354	0.158518807502268
LINC00933	59.6078849740061	1.50523949306778	0.561187300657513	2.68224083350456	0.00731307914324319	0.158535023900218
INHBA	1158.58746044332	-2.30014649151676	0.857562914738501	-2.68218978687779	0.00731419520770998	0.158535023900218
RP11.656D10.6	16.9898344856991	-1.06330251649499	0.396499365890866	-2.68172564187066	0.00732435011566394	0.158618743741973
CD63	63254.1150280943	0.995488736563921	0.371314961169902	2.680982025145	0.00734064588213119	0.158773094757585
MAN1B1	7572.24676799892	-0.872146488463003	0.325327554465932	-2.68082576003974	0.00734407444015171	0.158773094757585
MTHFSD	855.328421546493	-0.47784657645034	0.178275482484076	-2.68038302178216	0.00735379620822367	0.158785337788653
NCS1	2471.62162446092	-1.13960396430996	0.425189445442049	-2.68022637091843	0.00735723875504391	0.158785337788653
RP11.258C19.7	411.378518350809	0.988566219804055	0.368931049916761	2.6795419361615	0.00737229680238098	0.158974215393002
RP11.131L12.2	7.72224442905918	1.46945900049309	0.548505504892989	2.67902325024026	0.00738372666716819	0.159084599851261
ZNF474	29.1127588164843	-1.606060094388	0.599655647652807	-2.67830395773724	0.00739960344492251	0.159290213388268
HNMT	2603.8797535085	0.934564504891389	0.348976091972028	2.67801871357508	0.007405908048677	0.159290213388268
QSOX2	1414.03929512029	-0.742540025002342	0.277308083983439	-2.67767175891882	0.00741358310184962	0.159319354502494
PLXDC1	4313.41552529409	1.57934330931235	0.58989723834199	2.6773193815102	0.0074213854146281	0.159351178476955
DNAAF2	576.915091150345	-0.857650379143551	0.320604747895851	-2.67510192775486	0.00747065332852411	0.160272535408881
BRPF1	1689.04116205699	-0.540543864973807	0.202121642556517	-2.67434925887593	0.0074874428620545	0.160496139172338
MRPL9	2460.07714575827	-0.618473123426817	0.231315735556263	-2.67371833541513	0.00750154272295553	0.160544261205344
PYCRL	711.926980329758	-0.839300983362487	0.313942711181604	-2.67342082956334	0.00750819963292603	0.160544261205344
GINS2	613.018884041566	-1.04602905829261	0.391273771407267	-2.67339426951731	0.00750879419077675	0.160544261205344
PPM1H	401.417101629747	1.02525597977938	0.383618111525087	2.6725953467198	0.0075266981613122	0.160790684110473
RP11.452L6.6	43.6140060146493	-1.17416031829048	0.439417212222984	-2.67208540227743	0.00753814609166627	0.160898887958276
RP11.624M8.1	10.1693206029547	-2.08755771291619	0.781495898423767	-2.67123310196084	0.00755731455132927	0.161101354607965
RP11.394O4.5	309.133475488089	1.6961396497697	0.634997757615332	2.67109549510753	0.00756041346006121	0.161101354607965
CHRAC1	1759.44325437039	-0.766238800538139	0.286950639529358	-2.6702808601329	0.00757878240153311	0.161356373967776
PRR7	145.650391557809	-1.4641913587472	0.5486588631095	-2.66867348218701	0.00761514405155773	0.161993714136428
CCDC42B	8.35262564568166	1.12703384724105	0.422434544507433	2.66794906310324	0.00763158271894589	0.162136994482163
DLK2	69.7789112174042	-1.0726599966245	0.402121571401592	-2.6675017529792	0.00764174905033046	0.162136994482163
CAD	3532.81372989232	-0.88597505574218	0.33215707343309	-2.66733761405401	0.00764548259443378	0.162136994482163
ZNF281	948.171994479704	-0.813948377666175	0.305164546695745	-2.66724423423176	0.00764760736430071	0.162136994482163
ATP8B4	576.997674500782	0.982624216689467	0.368592528927069	2.66588207728945	0.00767866219260741	0.162658585337183
SLC6A8	2004.18056960049	-1.35281972361842	0.507788059254055	-2.66414244873289	0.00771848704430794	0.163364921421423
HMGN1	5366.79865556924	-0.688527550439904	0.258563331991379	-2.66289711358942	0.00774710974670549	0.163673797991874
TUBB3	238.005830502174	-1.49398591992223	0.561087653537725	-2.6626604782737	0.00775255929872651	0.163673797991874
TUBB3.1	238.005830502174	-1.49398591992223	0.561087653537725	-2.6626604782737	0.00775255929872651	0.163673797991874
GLDN	134.874727670214	-1.96636994425114	0.738588429014769	-2.66233516124014	0.00776005673812576	0.163694694712881
C8orf22	27.5834581041946	-2.74869537709046	1.03260522185395	-2.66190342535304	0.0077700167987425	0.163694694712881
KIAA1147	1139.65365629804	0.593171964042983	0.222848450081644	2.66177289465404	0.00777303037017292	0.163694694712881
RP5.1050D4.5	26.5699579818193	-0.987787852086483	0.371146152280176	-2.66145249255018	0.00778043195682401	0.163705417799313
LMOD2	32.0110806703724	-3.0441251301798	1.14389671066639	-2.66118881346062	0.00778652792531642	0.163705417799313
CTB.113D17.1	127.02431464875	2.14321304529056	0.805995686234658	2.65908748879653	0.00783526136744047	0.164592723792033
DLG2	109.973363354693	-1.50882766835877	0.568096889723715	-2.65593368957286	0.00790891643907339	0.166001636632941
RP11.323P17.2	4.06652461251142	1.56886114701102	0.590920310101043	2.65494537959399	0.00793212510464729	0.166350257602287
RP11.348N5.7	19.7102973071056	0.920440377568801	0.346742780846458	2.65453364399354	0.00794181195322874	0.166414959033242
LINC00032	2.14051485110472	2.48201508151769	0.935228891971947	2.65391189560485	0.00795645982392553	NA
RP11.407N17.6	41.6149311604119	-0.648963556049134	0.244541291908971	-2.6537994912152	0.00795911055802494	0.166638919390941
LILRA4	22.744128753688	2.02715304338567	0.764103404469352	2.65298260880472	0.0079783981490922	0.166758248102958
CA10	13.9724120875778	3.09958637136677	1.16845619552934	2.65271936014905	0.007984622682819	0.166758248102958
CTD.2541M15.1	40.9609804498473	-1.07327721112186	0.404595297608368	-2.65271795660056	0.00798465588147695	0.166758248102958
ENO1	87612.3074438705	-1.19219085185071	0.449533144894104	-2.65206440368609	0.0080001280490469	0.16694306942084
PBLD	197.422102210936	-0.62485818259272	0.235672006157633	-2.65138907577666	0.00801614391375953	0.167138921239082
RNF220	3743.94475808707	-0.425051409390744	0.160364055091969	-2.65054041659757	0.00803631115269901	0.167288218874022
MPZ	171.489578481041	1.24006399615925	0.467855240549415	2.65052924212842	0.00803657700160428	0.167288218874022
P4HB	55165.0768194227	-0.776033184827497	0.292837453966877	-2.65004757525065	0.00804804370101306	0.167388684500938
CTB.63M22.1	149.13711835234	1.0659567417761	0.402374488197385	2.64916582199714	0.0080690729288671	0.167687708483827
SEPHS1	2343.29564920731	-0.675829623350174	0.255138313017197	-2.64887548780109	0.00807600796395367	0.167693582170794
ST8SIA1	413.25981710714	1.47020316200514	0.55514026266595	2.64834540183554	0.00808868356877659	0.167818547655737
HSPB6	10850.7268454031	1.71556888801007	0.64803039618623	2.64735867037486	0.00811232608473175	0.168170654559143
PCBP4	1682.71731637001	-0.815953269425652	0.308313403942637	-2.646505987062	0.00813280655308463	0.168456686598322
RP3.523K23.2	3.15540935239553	-2.75483932183064	1.04121637649337	-2.64578946703514	0.00815005230895843	0.168551692240931
ENHO	235.866421909912	2.3326665360697	0.881725791215824	2.6455691319329	0.00815536208023947	0.168551692240931
GRPR	47.8997951130417	-2.05414214114988	0.776524449671433	-2.64530259416691	0.00816178940989232	0.168551692240931
RP11.114G22.1	8.37507481913078	-2.87931143425119	1.08853193093197	-2.64513272641071	0.00816588799020702	0.168551692240931
TOPORS	1059.45565381665	-0.55202726165	0.208711625243906	-2.64492819221203	0.00817082544900102	0.168551692240931
MSTN	33.6277371843976	1.77779433791731	0.672518390025574	2.64348806558243	0.00820566583310105	0.168947032828803
RCVRN	78.9534122119228	2.3336579676482	0.883017945242188	2.64282054540595	0.00822185991780642	0.168947032828803
RP3.510H16.3	4.61667774411814	1.15552833944073	0.437242484116926	2.6427631838532	0.00822325284648636	0.168947032828803
KB.1517D11.4	6.23775852979646	3.16299208227607	1.19687763577279	2.64270296957618	0.00822471527595863	0.168947032828803
RP11.438L19.1	16.5711745235651	0.812059924929667	0.307362051817471	2.64203053086044	0.00824106267356787	0.168947032828803
CRTAC1	180.91691397259	-2.16435035207397	0.819201870617744	-2.64202320539366	0.00824124092013797	0.168947032828803
IRAK4	1408.51884203104	0.509617515574304	0.192893606454042	2.64196167484548	0.00824273824545036	0.168947032828803
DLL3	13.5238152937776	1.43445152455052	0.542956744590484	2.64192597079245	0.0082436072032461	0.168947032828803
RN7SKP150	2.50605347798594	1.83570257401351	0.69493723025038	2.64153724121548	0.00825307332859042	NA
SUV39H2	503.52453775698	-0.806386842956896	0.305329118276452	-2.64104140315493	0.00826516181483338	0.169251177114801
TMEM39B	1446.21001721199	-0.491527633452762	0.186144283945193	-2.64057333932147	0.00827658770215624	0.169347583438275
ADAM33	3463.17494305071	1.95906791784992	0.742187802310056	2.6395851720445	0.00830075623869454	0.169704349768866
NTF3	32.1123754604888	2.10421481960191	0.797266621005073	2.63928623645278	0.00830808001723624	0.169716435230544
TFAP2A.AS1	26.2072285475305	-1.88303187089217	0.713743300084957	-2.63824805174077	0.00833355996785303	0.169825873512929
RERE	6796.76816113863	-0.597285634609305	0.226408396129615	-2.63808959746955	0.00833745502099175	0.169825873512929
RP11.837J7.4	5.44039851172037	1.13617065521322	0.430688460300371	2.638033659924	0.00833883044201118	0.169825873512929
BTF3L4P2	47.2976549516829	-0.687603520115678	0.260656264583675	-2.63797043671262	0.00834038525107134	0.169825873512929
AC092839.1	3.53125926363644	1.76652703414132	0.66982550026844	2.6372943900066	0.00835702706687405	0.170027391688266
CTD.2547L16.3	1.84269206250965	1.86657482932396	0.707885631395032	2.63683107346803	0.00836844938605388	NA
RP11.620J15.3	525.706398717255	0.999983243980577	0.37934492673303	2.63607912880915	0.00838701709078331	0.170499940987472
RP11.1391J7.1	76.3291760848537	0.919791253950703	0.348960755949725	2.63580141396535	0.0083938839920723	0.170502036802706
C17orf107	116.876349431011	1.54836010364163	0.587518989338034	2.63542137656894	0.00840328911590358	0.170548815548556
BEX4	1081.68924507632	0.837857418878377	0.317952930119368	2.63516181015795	0.00840971825320754	0.170548815548556
ANKRD18B	2.50321754860842	-3.75014724830954	1.42337067454447	-2.63469475336053	0.00842129775037289	NA
CTD.2066L21.3	5.41431856611276	-2.25853908554923	0.857335462018655	-2.63437030848035	0.00842934993555763	0.170722689970617
GPR87	4.06025374966253	-3.83384409290655	1.45542882912832	-2.634168030877	0.00843437361517304	0.170722689970617
CTC.246B18.10	20.9245557583092	1.06471071893601	0.404218568142622	2.63399755193915	0.0084386096359643	0.170722689970617
BCAT1	5611.86336072887	-1.07238438603703	0.407177668058345	-2.63370137942675	0.00844597338558111	0.170734640820953
ACSL5	1617.53846095533	1.23843849637887	0.470289328143605	2.63335445281614	0.00845460634436862	0.170772208917343
CTD.3216D2.5	3.87389781711353	1.19575388497799	0.454214947547981	2.63257273111137	0.00847408772092958	0.171028665547792
CTC.378H22.1	17.9462715154599	1.42025065403043	0.539637772088937	2.63185923500618	0.00849190386934763	0.171251130190812
CTD.3193O13.12	3.30234182223425	-1.26246108107443	0.479784408987244	-2.63130909930839	0.00850566373513608	0.171391503945092
CLDN11	1836.22309082385	2.260468983859	0.859360227761685	2.63040912394408	0.00852821669701587	0.171708695286243
DPRXP6	2.7055499916403	1.55126533798781	0.590049232341017	2.62904390508766	0.00856253052308373	0.172261986772462
LDB3	81.6190396544853	0.93786576084849	0.356769771117584	2.62877025122005	0.0085694234548437	0.172263178987002
SLC7A14	13.6116603411642	3.77312797303813	1.43553095871884	2.62838495409776	0.00857913692268871	0.172321022746723
CTD.2555O16.2	71.3396732376489	-0.982747420278016	0.374024896469567	-2.62749199198823	0.00860168664347668	0.172546401747982
NDUFA4L2	4475.9328758112	-1.72193713946009	0.655377193771097	-2.62739862757799	0.00860404740547498	0.172546401747982
SLC25A4	592.42509196324	-0.841355485818224	0.320307897214513	-2.62670852993288	0.008621514811193	0.172759257043365
PPP1R8	2788.189822461	-0.406652741148515	0.154841294293578	-2.62625511497923	0.0086330086718246	0.172765108155399
MFSD3	595.923357079701	-1.14201335280891	0.434861142242884	-2.62615635629974	0.00863551397476208	0.172765108155399
TLDC2	94.9140612528634	0.803979016610991	0.306328911787256	2.62456133154467	0.00867606654965779	0.17343876731465
KLHL30.AS1	4.36462610938713	2.51839364911609	0.959876093132051	2.62366535340893	0.00869892085318442	0.173643397281184
SLC35E2B	2277.17902137388	-0.589273784459189	0.22460333049658	-2.62361997552018	0.00870007976698409	0.173643397281184
TFRC	4105.41020067037	-1.32740100230833	0.506158261379611	-2.6225019002758	0.00872867810388465	0.17407635889456
PCIF1	3033.74090564555	-0.338438552468889	0.129090170404182	-2.62172209866356	0.00874867371232379	0.174283191285441
MED7	477.639872102189	0.445041394653922	0.169762152698633	2.62155838376986	0.00875287687112695	0.174283191285441
PDS5B	2245.59448001911	-0.618410505681089	0.235932019052669	-2.6211385303452	0.00876366428945394	0.174360259990967
EIF1P6	10.0511514970577	1.56435622821527	0.597333595207675	2.61889878748807	0.0088214116318335	0.175370776352728
USP2.AS1	30.6297190600216	-1.55464290333465	0.593936761320132	-2.61752261281013	0.00885706196280786	0.175940754892404
RP11.265E18.1	11.067184113227	1.37056030474833	0.524061959769794	2.61526386183493	0.00891585482037006	0.176969187647156
RP11.60A24.3	2.65944564650972	-1.95490612385935	0.747598741309973	-2.61491361052038	0.00892500263549445	0.177011381931978
RP5.1031J8.1	2.53856072359894	-1.88221917599272	0.720022430029406	-2.61411186303717	0.00894597412929935	NA
ABALON	54.7076946264008	-1.16149519274309	0.444326647731835	-2.61405702014993	0.00894741027426413	0.177276930803138
DAK	1356.64942135841	-0.617844366850776	0.236372007328381	-2.61386436504908	0.00895245687529336	0.177276930803138
DNAJC25	667.815534637791	0.453086438447172	0.173371236174909	2.61338875146548	0.00896492646098445	0.177384510383435
RP11.495P10.8	9.34277187260326	-2.14813733999803	0.822516334550564	-2.61166526397534	0.00901024271664976	0.177954222936964
ANKRD18EP	182.629616234258	-0.904252486788677	0.346262865821082	-2.61146249293713	0.00901558767185419	0.177954222936964
THNSL1	336.445257173418	-0.866305393666356	0.331851830808704	-2.61051865091484	0.00904050421042979	0.177954222936964
RP11.503N18.1	3.88124058551375	1.89920114093845	0.727533897584086	2.61046412716316	0.00904194546277428	0.177954222936964
RP11.789C17.5	2.44346000353667	1.87350761005087	0.71774017020359	2.6102866856671	0.00904663727884148	NA
LIN37	344.039917294946	0.618779082153747	0.237066415695272	2.61015074758262	0.00905023315363762	0.177954222936964
MUC3A	112.499290804362	1.71530453363809	0.657192750488111	2.61004786246364	0.00905295554990998	0.177954222936964
EYA4	455.094235549847	-1.98727551760904	0.761401104022628	-2.61002447607429	0.00905357446848751	0.177954222936964
RP11.680F20.6	4.27184860445748	2.58329878214197	0.989852173800733	2.60978240035872	0.00905998319920046	0.177954222936964
HAL	8.0262882339475	1.14539567247412	0.438921542783465	2.60956813650676	0.00906565901532642	0.177954222936964
TOMM7	7974.46843285341	0.683735115193776	0.262032175513619	2.60935556426825	0.00907129315781807	0.177954222936964
IP6K1	3234.10130504931	-0.390424669111095	0.149640768833916	-2.60907954532379	0.00907861359495519	0.177954222936964
CEP85	1340.67374956921	-0.744793481680551	0.285493445118275	-2.6087936322741	0.00908620199937132	0.177954222936964
GREM1	255.240052276703	-2.74730204679167	1.05317507743699	-2.60859006792821	0.00909160824143614	0.177954222936964
EPHB2	6065.62420189679	-1.63457585208421	0.626680631314429	-2.60830759785216	0.00909911481137738	0.177954222936964
AEBP2	1393.134813705	-0.605047590035907	0.23200371816588	-2.60792195409259	0.00910937212916788	0.177954222936964
SLC5A10	12.6695389491377	1.30620034185778	0.500863678745197	2.60789591517232	0.00911006508188892	0.177954222936964
RP11.469A15.2	4.15223760888449	-2.48444553455955	0.952808542573527	-2.60749712408023	0.00912068366741805	0.177954222936964
RP11.927P21.1	7.47796014605584	1.13667548705792	0.435957133467196	2.60731021423565	0.00912566430591403	0.177954222936964
GRIP2	144.610180407119	1.73488442388049	0.665429693098474	2.60716412548748	0.00912955886364026	0.177954222936964
RP11.517C16.2	5.80355005226659	-0.90681930764148	0.34795169750507	-2.60616434448711	0.00915625171865324	0.177954222936964
PPP3CA	3605.09624957978	-0.651161671665878	0.249855077256693	-2.60615745261361	0.00915643596423964	0.177954222936964
AGO2	2614.06292674417	-0.844219731243861	0.323970679600648	-2.60585227121329	0.00916459792438991	0.177954222936964
SLC35F4	26.0165411339056	-1.7644156404541	0.677101252296114	-2.60583721337215	0.00916500080867099	0.177954222936964
SPTA1	107.355708655938	1.87142374782939	0.71818900338836	2.60575383220873	0.0091672320228705	0.177954222936964
OPN3	255.522434855712	-1.18189191848551	0.45358945308153	-2.60564241618968	0.00917021418447409	0.177954222936964
PHC1	493.224858805686	-0.686218158955702	0.263394297138647	-2.60528859740075	0.00917969024155849	0.177954222936964
LINC01160	17.8447031090592	1.19646353071112	0.459274624118498	2.60511569305083	0.00918432418442516	0.177954222936964
SNHG14	1128.35342686136	-1.43332217956674	0.550394438884785	-2.60417271379223	0.00920963337100431	0.178254562520615
C16orf46	35.0245371514109	-0.888358560296944	0.341166069975845	-2.60388895167635	0.00921726160714882	0.178254562520615
IGLV3.9	25.7987642255762	3.50509165907546	1.34617135127557	2.60374851667598	0.00922103893711847	0.178254562520615
DVL3	6024.46757127077	-0.574967973390221	0.220857950776632	-2.60333835104593	0.00923207921858526	0.17833122830812
PTX3	3200.13984749416	2.37010023675877	0.910806760765269	2.60219877459779	0.00926281473276378	0.178787927858736
ALX4	50.6352685061065	-2.1014812589282	0.807854631173968	-2.60131114910408	0.00928681810448136	0.17889969478995
ZSCAN20	188.654261706724	-0.637184716320173	0.244953982302024	-2.60124252862537	0.00928867606439631	0.17889969478995
RP11.115L11.1	20.8754208083843	1.61221707661624	0.619798032052565	2.60119747601829	0.00928989608378469	0.17889969478995
NHLRC2	1131.90477403079	0.407687806091927	0.156771185586503	2.60052767073687	0.00930805120602012	0.179073744818856
RP11.1148L6.8	293.774503744606	1.06575365227768	0.409865805385444	2.60025022403474	0.00931558068748839	0.179073744818856
RP11.405M12.3	10.5583988370531	1.38911599789007	0.534274825894484	2.60000271501546	0.00932230229175499	0.179073744818856
RP1.313I6.12	34.0211438793146	0.721020210009531	0.277334989165627	2.5998169656802	0.00932734952979839	0.179073744818856
FNDC5	1914.25482997466	1.89254522959694	0.728155215193848	2.59909589343958	0.00934696583728227	0.179313786016904
LINC00176	85.5851737256039	1.32551646604243	0.510157967029253	2.59824711502824	0.00937010346456989	0.179620964361124
RP3.508I15.21	57.8875213770089	0.85389826450012	0.32870532995931	2.59776214947845	0.00938334650979752	0.179738144999222
ASXL3	54.3646274426961	-2.28684525552439	0.880505123223828	-2.59719698978182	0.0093988004964625	0.179770351418119
UNC93B2	5.54133832590712	2.8272416109054	1.08858170069284	2.59717907172788	0.00939929082708191	0.179770351418119
AC000123.4	36.1260703351605	0.636431527692955	0.245195874369652	2.59560455219359	0.0094424670292156	0.180158438224361
BANP	812.643282826974	-0.470535922306095	0.181282347515923	-2.59559702725477	0.00944267380083088	0.180158438224361
AJ003147.11	14.7579393834276	1.39674561146456	0.538130864390192	2.59555008621807	0.00944396374621505	0.180158438224361
MTCH2	3104.80846015	-0.594098302213712	0.228937056993571	-2.59502900061476	0.00945829380206406	0.180158438224361
NXPH3	397.511912285062	1.60997350834527	0.620437104320046	2.59490204105328	0.00946178817606287	0.180158438224361
LDOC1L	2326.14957188955	-0.66173255734939	0.255014948515062	-2.59487752072034	0.00946246319458325	0.180158438224361
MMP10	35.6548666450764	-2.37418583405071	0.915219931001348	-2.59411509040576	0.00948347352749201	0.180422189193222
SRPK1	2025.83995945392	-0.66728712850265	0.257258589409337	-2.59383809121684	0.00949111710662915	0.180431432898875
ODC1	3472.08396440287	-0.737824514882017	0.284483961437334	-2.59355399564255	0.00949896221181812	0.180439758411757
RP11.247L20.3	3.80986017155442	-1.7505331177672	0.6751486652173	-2.59281134356354	0.00951949736629216	0.180439758411757
RP11.981G7.2	9.52535043287249	2.05504422949222	0.792598584534647	2.59279321158362	0.0095199992303726	0.180439758411757
TMEM182	140.941476804622	-1.05244373350705	0.405912235963733	-2.59278642095697	0.00952018719008396	0.180439758411757
GPKOW	1863.98289172215	0.365630181576347	0.141064427880887	2.59193750734297	0.00954371059721084	0.180470737872074
HAR1B	53.2722784766655	1.91768470372039	0.739894814019712	2.59183422749236	0.00954657601674887	0.180470737872074
U2AF1L4	484.998874063284	0.67202204579928	0.259285143367233	2.59182626922621	0.00954679684451622	0.180470737872074
DSEL	1665.05089171634	1.23852088983582	0.47792662578703	2.59144568017377	0.00955736283459405	0.180470737872074
CCKBR	5.21799924392419	-2.81551416862134	1.08646851900831	-2.59143649297012	0.0095576180204387	0.180470737872074
MDC1	2614.8944377509	-0.628740418600605	0.24271580743566	-2.5904386914201	0.00958536937050043	0.180859274769143
RP3.425C14.4	583.379340460293	-0.862061235049132	0.332855914530967	-2.58989309612803	0.00960057409979294	0.181010674575602
GOLGA2P10	95.5428385369648	-1.53077120538922	0.591271917671874	-2.588946235459	0.00962701239965658	0.181357051150591
FEM1C	2211.57052826693	0.695933572160225	0.268833063274572	2.58872016590249	0.00963333431809905	0.181357051150591
XBP1P1	4.65682370292343	1.26675538075117	0.489412705841312	2.58831731508398	0.00964460900783326	0.181378599794113
PRSS35	266.469754513623	-1.87094076873635	0.72298516777072	-2.58779965639583	0.00965911412463529	0.181378599794113
RPP30	1222.58219629112	0.403577121686216	0.155962018654154	2.58766285002472	0.00966295077125484	0.181378599794113
USP32	1765.83735512107	-0.736585374334061	0.284653973766735	-2.58765182367582	0.00966326005726335	0.181378599794113
DCAF12L2	106.432175105832	-2.63190396298434	1.01830681537803	-2.58458838067118	0.00974953135946244	0.182597412534403
A1BG.AS1	79.8919433851758	-1.53155976101951	0.592589108142347	-2.58452229373681	0.00975140001006158	0.182597412534403
TLN1	32079.8644545105	-0.793253021562335	0.306980873571573	-2.58404705261674	0.00976484716239522	0.182597412534403
RIMS2	4.62117350092609	-2.01917774136063	0.781477873008332	-2.58379387453125	0.00977201769057974	0.182597412534403
NSMF	2710.87967473527	-1.16636718721888	0.451454324056213	-2.58357739657767	0.00977815251610151	0.182597412534403
CASP3	2067.18689779688	-0.534947252813075	0.207065056929411	-2.58347429907229	0.00978107542974329	0.182597412534403
DR1	4054.31518600738	-0.488897428404098	0.189257106499598	-2.58324475865922	0.00978758591854342	0.182597412534403
FUT2	41.9611511320799	1.06078696591362	0.41068002914176	2.58300109730307	0.00979450114703546	0.182597412534403
RP11.697E2.9	5.76774734096879	1.3359657478705	0.517230066111787	2.5829236067297	0.00979670127975993	0.182597412534403
CXCL3	53.1969085505145	-1.49647720822334	0.579404427805353	-2.58278524707111	0.0098006307187816	0.182597412534403
TONSL	949.027511895356	-0.951576024746638	0.36856118849673	-2.5818671483774	0.00982674048541993	0.182916244725091
CAMKV	2.0682689570452	2.24144339824815	0.868275649558367	2.58148826284397	0.00983753364898286	NA
LAMB3	3891.34575401049	-1.63773618709074	0.634430836165192	-2.58142589189077	0.00983931139805997	0.182916244725091
RNF130	6345.20043130993	0.596843830920305	0.231207668168813	2.58141884154347	0.00983951237096251	0.182916244725091
MUTYH	685.747356092522	-0.565101250576585	0.218936963162809	-2.58111395359201	0.00984820682102768	0.182942960607565
RP11.295G24.5	10.1849863642279	-1.31054335942195	0.508068733786024	-2.57946075456375	0.00989547018133013	0.183685576090552
RP11.549J18.1	19.3790663013659	0.805570620648261	0.312339184083808	2.57915324652993	0.00990428379541622	0.183713896920421
LINC00926	122.468277320617	1.13571611504818	0.440455916931501	2.57850121065533	0.00992299520344335	0.183877635088755
AC006077.3	17.6995637281273	0.794689907244487	0.308217961049209	2.57833743542807	0.00992769999031245	0.183877635088755
RP5.1171I10.5	57.767998207173	1.93141771085412	0.749187896445286	2.57801510144281	0.00993696551478017	0.183914116517312
PTGER3	295.178510438696	1.77365357622212	0.688164800950091	2.57736747618214	0.0099556048619101	0.184123908553947
NDFIP1	6622.39745566943	0.487070143246898	0.189012244542089	2.57692375658995	0.00996839355903128	0.18418391955156
TTC4	191.213955111238	-0.509700705903249	0.197807818589665	-2.57674701403274	0.0099734916316373	0.18418391955156
LINC.PINT	281.878476701129	0.863980500537219	0.335358584937669	2.57628860372787	0.00998672512950449	0.18418391955156
SORCS3	7.58572194384794	-2.8150245017439	1.09270455533157	-2.57619910890708	0.00998931051131903	0.18418391955156
RP11.81H14.1	6.97702833815412	1.91946214568298	0.745136001248152	2.57598900397747	0.00999538249549879	0.18418391955156
S100A2	381.382715479302	-1.86042382065672	0.722388587920029	-2.57537819916761	0.0100130532887035	0.184374760629393
RP11.6I2.3	18.7236476661318	1.28903721132843	0.500667360884289	2.57463799727569	0.0100345048707739	0.18463488962224
PECAM1	17337.8979230785	1.05028758048572	0.408015669908123	2.57413540201097	0.0100490937635502	0.184663702139404
PLOD1	25899.7367909575	-0.956508421982065	0.371595980826114	-2.57405481043041	0.0100514348614925	0.184663702139404
WDTC1	4504.05570589071	-0.387095014335383	0.150396656487164	-2.57382726037145	0.0100580475657491	0.184663702139404
S100A10	33766.324782219	-0.827445510368158	0.321603249714181	-2.57287670788008	0.0100857129517056	0.185036864691845
RP11.799B12.1	35.7629257223251	1.22427180030078	0.475900379256482	2.57253797993082	0.0100955878341975	0.185083329545054
FAM60A	591.467186728044	-1.30324623772752	0.506677657270111	-2.57214072700419	0.0101071798547987	0.185161184432968
RP11.434B12.1	45.9794980544499	0.982851005688193	0.38221763363045	2.57144338515388	0.0101275572726845	0.185289241183116
EN2	116.541977820868	-2.6416648067146	1.02739650547534	-2.57122230087048	0.010134025333639	0.185289241183116
PDGFB	2092.57340474052	1.07490011893795	0.41810103295881	2.5709099815686	0.0101431688422569	0.185289241183116
KRTAP5.10	4.80238776392228	2.32980603068754	0.906223286377772	2.57089623022149	0.0101435715976158	0.185289241183116
EFEMP1	14351.2419533313	1.90255708604233	0.740210703849268	2.57029123754709	0.0101613049824182	0.185478766109195
RP11.883A18.3	5.83620244291025	2.0984115580391	0.816783804016122	2.5691150433214	0.0101958602889413	0.185934287567357
CTD.2265M8.2	7.09315684639734	1.43660939099916	0.559222637217996	2.56893998094562	0.0102010123653465	0.185934287567357
IPO13	2871.78950343779	-0.594385223073778	0.231427694069881	-2.56834094753716	0.0102186594251135	0.186070381366344
GAPDHP14	11.4102590933526	-1.91389618530877	0.745232829998072	-2.56818554989548	0.0102232417562832	0.186070381366344
TMCO3	3608.69897901484	-0.649667407448584	0.253011501621685	-2.56773863355824	0.0102364305229045	0.186176003334327
REEP3	2651.35060502064	-0.749826373968294	0.292080676250415	-2.56718925604455	0.0102526637306944	0.186330131403209
ENSG00000127540	3082.9637835186	0.475519341225476	0.185246699091289	2.56695176517634	0.0102596882889422	0.186330131403209
GAB3	594.880362175686	0.806842747389148	0.314369982908314	2.5665387640539	0.0102719143322162	0.186387716681017
USP30	816.368343791295	0.607823724938864	0.236844096534201	2.56634526185495	0.010277647024223	0.186387716681017
MYLK.AS1	34.5490192852729	-0.703907550859747	0.274312106205175	-2.56608270264693	0.0102854301511261	0.186394768691291
RWDD4	414.005612523497	-0.433607060730714	0.169000496421012	-2.56571471630779	0.0102963473169945	0.186407564090682
DGCR6	208.528484782559	1.101059777885	0.429194676850568	2.56540874636325	0.0103054324745781	0.186407564090682
TMEM63B	2185.5305790285	-0.553602592983174	0.215809481348965	-2.56523758605395	0.0103105178445242	0.186407564090682
PSMD2	13027.2013971703	-0.807945578996592	0.314980826604995	-2.56506273002389	0.0103157153247581	0.186407564090682
CLDN5	4585.82766276242	1.876487077402	0.731821746726782	2.56413134181235	0.010343439534916	0.186675846447502
SLC12A6	1989.81861815008	-0.848502212746226	0.330945738516615	-2.56387109424474	0.0103511980495378	0.186675846447502
PTH2R	118.980116687361	-2.3071187659354	0.899876147958655	-2.56381811115789	0.0103527782185658	0.186675846447502
C12orf76	553.602893473638	0.558707465659183	0.217943853772934	2.56353852603376	0.0103611201285891	0.186692720658667
CTC.471J1.9	3.40125178129203	1.43236165560407	0.558805867733086	2.56325450091414	0.0103696006378898	0.186712066342805
RBP7	1615.45189243116	1.60407981899838	0.626242909045852	2.56143390340718	0.0104241074418702	0.187322015069098
SLC39A5	10.2055297171843	1.46906736863465	0.573540835241708	2.56139977899837	0.0104251315206524	0.187322015069098
LRRC4C	202.600780678002	-2.57353295565355	1.00475386599674	-2.56135660956184	0.0104264271703651	0.187322015069098
FCRL1	5.35714671344364	2.52528856332347	0.986005223217125	2.56113102026376	0.0104332001411066	0.187322015069098
BNIP3	1667.15059448067	-1.54813209860177	0.604642508772186	-2.56040896255455	0.0104549051348172	0.18742688329963
IGLV2.23	132.065880097484	2.93728319294713	1.1472503466971	2.5602809372893	0.0104587577537105	0.18742688329963
ART5	9.43545752705972	2.59999034693299	1.01554390034856	2.56019493203652	0.010461346588487	0.18742688329963
FAM183A	1.77765907168534	2.43701360062864	0.951975645058788	2.55995372704954	0.0104686101154231	NA
ITGA10	2099.83821244829	-2.38335179333012	0.931318321894345	-2.55911618755901	0.0104938662132897	0.187872845202515
NAAA	1842.27356428319	0.99006010608015	0.386912232411058	2.55887517412038	0.010501144037224	0.187872845202515
LCA5	464.704495544058	-0.832269832491866	0.325325769338368	-2.55826593197488	0.0105195611982796	0.187914559247789
CHST2	2183.28508284484	-1.34019053956173	0.523886886678686	-2.55816775269601	0.0105225318077093	0.187914559247789
PLEKHG4	2326.63556180439	-0.841024081393727	0.328786779478679	-2.55796197988023	0.0105287602947412	0.187914559247789
TRIM65	2550.96688750161	-0.485659036081801	0.189872822863132	-2.55781227012086	0.0105332938835737	0.187914559247789
PDE4DIP	5183.2762151574	-0.864639459851497	0.33819493449164	-2.55663042721556	0.0105691440690242	0.188420780545942
CD40LG	21.8919567684644	1.44727781328691	0.566436015143675	2.55505966180454	0.0106169598424386	0.189139451383882
PAPD4	2303.18241608012	0.462624406022192	0.181101088674187	2.55450924900006	0.0106337604568969	0.189304967229843
N4BP2L2.IT2	67.7056169613052	0.785969419443595	0.307721643449809	2.55415709675875	0.0106445218313375	0.189362813214083
AFF3	606.464967606985	-1.5064001384835	0.589949519034884	-2.55343904839156	0.0106664945890177	0.18961988406203
TAF9P3	5.24857333307309	1.47622462814427	0.578229463000051	2.55300831694932	0.0106796946030838	0.189720748100449
ARHGAP27	1589.54030628945	0.934229816011374	0.366054100513893	2.55216323133612	0.0107056349534069	0.190047637961606
FADS3	1870.14820917883	0.79952152426225	0.313328207389219	2.55170618350705	0.0107196876086622	0.1901631845455
ACTN1	15719.7147941459	-1.25237167561544	0.490970707911494	-2.55080731993731	0.0107473724381533	0.190486312847628
RPL9	20172.0039975423	0.495420171164815	0.194242542208155	2.55052351319574	0.0107561268269493	0.190486312847628
RP11.362F19.1	9.53485671251404	1.31624088254118	0.516096093716325	2.55037947112356	0.010760572417289	0.190486312847628
AC005387.2	6.04034318865778	1.29533996944646	0.507962418525306	2.5500704819995	0.0107701143020765	0.190521432509997
RP11.264B17.3	41.4030209606762	0.848961526539046	0.332965846224212	2.54969552032485	0.010781703585631	0.190592695642768
WDR55	1615.28404853594	0.350901469661454	0.137645607749839	2.54931105610861	0.0107935980830551	0.190662544740569
DUSP26	22.9914440952137	-2.45244064701584	0.962088901943975	-2.54907903215648	0.0108007820489342	0.190662544740569
FOXJ3	3073.03196620539	-0.435308917390389	0.170791092663287	-2.54877997793828	0.0108100476871847	0.190692569698077
LPA	5.55488603645893	2.39713702029404	0.940800377425892	2.54797625278681	0.0108349846373311	0.190887896790953
CTD.2124B8.2	85.7649930820248	0.643417046908842	0.252540741478698	2.54777523476589	0.0108412295540891	0.190887896790953
BHLHE41	1269.51141834344	-1.45665656151068	0.571755518576575	-2.54769130193465	0.0108438379960586	0.190887896790953
MZT1	909.539615340028	-0.72201842903481	0.283456420229707	-2.54719377479509	0.0108593114679663	0.190962041559348
RP11.26P13.2	1.80074509266037	-2.2836797021611	0.896598678599	-2.54704781154653	0.0108638547576633	NA
CHCHD10	672.422833967964	1.09177840871613	0.428657137138349	2.54697359293882	0.0108661655530453	0.190962041559348
RP11.367J11.3	28.1070983032578	1.31600945977721	0.516725404425679	2.54682554506858	0.0108707763264703	0.190962041559348
FAM181B	7.30344956018634	-2.06179985240841	0.809785024309988	-2.54610765883853	0.0108931587008308	0.191177972813768
MCFD2	6843.87141511626	-0.997801820029656	0.391918061673885	-2.54594497576365	0.0108982365492457	0.191177972813768
NCAPD3	1943.31393832385	-1.00650120937076	0.39548907625929	-2.54495324849599	0.010929236989879	0.191450773295527
TMEM185B	924.37795305273	-0.528207849159406	0.207608662505603	-2.54424763776488	0.0109513413917067	0.191450773295527
CDK3	24.3085761825085	0.8355187314656	0.328395653322913	2.5442441853639	0.0109514496413662	0.191450773295527
ACOT12	4.24685755145035	2.48056491339455	0.975103006154139	2.54390038564032	0.0109622342076721	0.191450773295527
RNF214	631.787814282727	-0.609371158580912	0.239561443736383	-2.54369463247798	0.0109686929394721	0.191450773295527
ITPR2	1731.67514855366	-0.567009555850586	0.222910234213202	-2.5436676689697	0.0109695395928997	0.191450773295527
C5orf45	815.48060257796	0.843687545254077	0.331768575092509	2.54300017721337	0.0109905173369131	0.191450773295527
STX10	2694.98289220685	-0.5787002439585	0.227566765743491	-2.54299102976574	0.0109908050677643	0.191450773295527
RP4.563E14.1	30.5946870047758	0.937930016871057	0.368843296172115	2.54289565949813	0.0109938053161847	0.191450773295527
RP11.114H23.1	7.64395880173575	-1.94816562679322	0.766148468733809	-2.54280430790771	0.0109966798235902	0.191450773295527
CWF19L1	1221.58174746751	0.535801711493166	0.210714630997259	2.54278361667318	0.0109973309953953	0.191450773295527
KRT8	423.318828750321	-1.74266872859692	0.685696430612396	-2.54145807211005	0.0110391185474959	0.191982985786283
AC068858.1	2.94510861984224	1.84455541081711	0.725822597110097	2.54133092323291	0.011043134298243	0.191982985786283
GRAP	129.145646935746	1.25976619725768	0.495787059140736	2.54094207186654	0.0110554234697724	0.192064172864247
ANKRD13C	1521.19922860053	-0.498538512362969	0.196327021436352	-2.53932703056156	0.0111065949976869	0.192489955887408
COX7A1	1705.67436142363	1.35738447718925	0.534562165968096	2.53924531813998	0.0111091895851767	0.192489955887408
FMN2	38.0043134575483	-2.42621897404231	0.955488831847143	-2.53924367629914	0.0111092417235231	0.192489955887408
CTD.2201G3.1	6.08682521972914	-1.26344598406745	0.497623596229685	-2.53895915233949	0.0111182803582422	0.192489955887408
RASGRP3	848.66120316319	0.806237952339115	0.317559078627294	2.53885971651078	0.0111214407329217	0.192489955887408
KLC2	1925.14835310961	-0.975148082526411	0.384109496232074	-2.53872422341061	0.0111257484024101	0.192489955887408
RP11.307C18.1	47.7798654764274	1.59639395139221	0.62896773301667	2.53811740665225	0.011145058834612	0.192691799110356
P4HA1	5194.50216237711	-1.10209916276631	0.434267066282317	-2.53783730873534	0.011153982291155	0.192713903766576
RP11.521I2.3	10.1998511353273	1.16334865171929	0.458483499167049	2.53738390549017	0.011168440419805	0.192831538426332
SCUBE2	518.958755976298	1.64248354760589	0.647581250604052	2.53633585912781	0.0112019242609202	0.192875619276844
LINC01480	57.5427765671674	1.12559726855248	0.443829032274493	2.53610554222676	0.0112092945514743	0.192875619276844
CEP164	1676.88686864658	-0.596133215927378	0.235061001271237	-2.53607877403491	0.0112101514303048	0.192875619276844
AC004448.5	33.0465137820475	2.06270350965508	0.81334761255429	2.53606634828278	0.0112105492118655	0.192875619276844
RP4.737E23.6	7.97618398287451	1.58608150268654	0.625449526710478	2.53590647198737	0.0112156683980572	0.192875619276844
CTD.2013N17.6	69.143563157112	1.00113182200874	0.394788623013495	2.53586796490463	0.0112169016923141	0.192875619276844
ECT2L	22.8376985004247	1.4912549062191	0.588130752892385	2.535583964765	0.0112260012909907	0.192881604548866
HEYL	996.634152591002	1.07945113650726	0.42575523263406	2.5353796119637	0.0112325529783297	0.192881604548866
MMP13	86.6268478491726	-3.31517694921652	1.3078826516342	-2.5347663607849	0.0112522346103219	0.193076985807026
RP11.337C18.8	112.548822315573	-0.937446606624796	0.369867370353217	-2.53454800765353	0.0112592498070584	0.193076985807026
PAICS	4223.88611108273	-0.781968272827469	0.308587726935006	-2.53402259575983	0.0112761460321381	0.193235274764199
DDX11	1285.91701089211	-0.710386089173777	0.280370117075399	-2.53374395454112	0.0112851157250341	0.193248493873391
MANF	3599.40390074138	-0.940182924412212	0.371160782305711	-2.53308800184018	0.0113062564055182	0.193248493873391
EPPK1	13.0812745114921	-1.61234911851237	0.636643764798651	-2.53257662709114	0.0113227618719552	0.193248493873391
SETBP1	1397.06975949376	-1.09206518505241	0.431258571333375	-2.53227473642074	0.0113325159326946	0.193248493873391
PRKAR2B	416.073087949111	-0.866601429011246	0.342224639386726	-2.53225901724731	0.0113330240220676	0.193248493873391
LINC01023	100.31401977945	0.891255963630538	0.351966411064689	2.53221880160243	0.0113343240006594	0.193248493873391
RP11.168A11.4	18.1261761609374	1.49707471732372	0.591361758066176	2.53157174420499	0.0113552584670241	0.193248493873391
STAB2	15.2827307977932	1.37799138756999	0.544330371721714	2.53153499998798	0.0113564482944336	0.193248493873391
TBX21	95.1641863980082	1.56324083865007	0.617530638724625	2.53143850785867	0.011359573366988	0.193248493873391
SORD2P	50.21558644334	-1.33554021772426	0.52759301986289	-2.53138341002187	0.0113613581527422	0.193248493873391
GOLGA2P7	20.1337871365944	-1.60765958679962	0.635126846409385	-2.53124174468192	0.0113659482650187	0.193248493873391
CTD.2287O16.5	102.373648861278	0.915955041933831	0.3618730320966	2.5311503226063	0.0113689113144335	0.193248493873391
KIZ	1161.30237839768	0.796092522339959	0.314638214724977	2.53018382727546	0.0114002780327085	0.193576072302305
FAM186A	17.6354550642859	1.18355947700935	0.467852442596497	2.52977086202822	0.0114137038490458	0.193576072302305
CTA.390C10.10	99.8742871274707	1.02655559783365	0.405793776860278	2.52974702021395	0.0114144793930452	0.193576072302305
OXCT1	2149.7316140423	-0.974869049052922	0.385445455740379	-2.52920104397224	0.0114322521137368	0.193576072302305
RP11.1379J22.5	8.99088383166541	0.865868002411643	0.342350255768273	2.5291875435248	0.0114326918938535	0.193576072302305
SLC44A3	65.6530299192988	-1.32793060636895	0.525076811889524	-2.52902161417166	0.0114380983065339	0.193576072302305
MAPKAPK5.AS1	812.687620351386	0.552947386529192	0.218651012838517	2.52890384247873	0.0114419369934321	0.193576072302305
RP11.368J21.3	28.6605992386285	1.50757071008753	0.596339990991681	2.52803892554736	0.0114701634161422	0.193729913198185
SQLE	1787.66061644417	-1.35712130311392	0.536840463618579	-2.52797878529169	0.0114721283796823	0.193729913198185
OGG1	1103.63594867927	-0.67508886451409	0.267053215323873	-2.52791887824816	0.011474086020505	0.193729913198185
SNORD104	37.4115360120987	0.942838163773291	0.373219984452537	2.52622636260034	0.0115295166614172	0.194302186397694
AZU1	5.47431391454473	1.19308059697561	0.472341993210095	2.5258829706571	0.0115407918551849	0.194302186397694
E2F3	1152.64611121643	-0.458656842438666	0.181642590266147	-2.52505121054832	0.0115681430676131	0.194302186397694
MYRF	115.936336750474	-1.20681419684747	0.477937274364899	-2.52504724276031	0.0115682736802391	0.194302186397694
FOXP4.AS1	7.44940843541364	-2.07526677742989	0.821915135419434	-2.52491612333049	0.0115725906382378	0.194302186397694
GALE	906.495826624522	-0.864583289672432	0.3424379567862	-2.52478813326243	0.0115768059442255	0.194302186397694
SFTPB	13.1829847502094	2.0320857250086	0.804875674473363	2.52472001509825	0.011579049946467	0.194302186397694
RP11.284F21.7	21.027038495905	-1.24737084688107	0.494072778748686	-2.52467025210379	0.0115806895222078	0.194302186397694
CTD.3074O7.5	155.577229518666	-0.736016409086565	0.291565564634237	-2.52435986399794	0.0115909207439329	0.194302186397694
RP11.613D13.8	13.166358182717	-1.73353615960818	0.686724895594381	-2.52435315907363	0.0115911418446335	0.194302186397694
C12orf56	21.4704049389242	1.93683597117031	0.767275288613813	2.52430385796663	0.0115927677063683	0.194302186397694
GTSF1L	6.5431836995299	2.50974495302601	0.994467109396089	2.5237083552719	0.0116124223028286	0.194502286650966
GTPBP4	2532.54046991609	-0.922859678670127	0.365761327418647	-2.52311988580966	0.0116318738059319	0.194698721713102
HYAL3	195.361369888656	-1.01657519987874	0.402969748075635	-2.52270847807646	0.0116454898046106	0.194797284004395
RP11.483I13.6	9.70106141346293	0.888253246926934	0.352228313966499	2.52181102911396	0.0116752409593924	0.195165433756209
RP11.514D23.3	10.3665969331722	2.56493415647252	1.01733608490591	2.52122596900683	0.0116946724609817	0.195360704702735
HBA1	3.36521185995814	1.95923011428296	0.777343522361654	2.52041736751161	0.0117215756292188	0.195593081218192
NRGN	490.125250313485	-1.18350528461969	0.469695916664158	-2.51972657762304	0.0117446025290217	0.195593081218192
ENSG00000213424	26.7568027145798	1.78160110408205	0.70707865084447	2.51966468221642	0.0117466677176857	0.195593081218192
NPHP3	454.210597373004	0.364583474315901	0.144695273225751	2.51966402348946	0.0117466896983582	0.195593081218192
BRSK2	36.5846723455807	-2.00106119815181	0.794184296069711	-2.51964337252038	0.0117473788069003	0.195593081218192
MFSD7	449.156796120212	0.907955043604808	0.360448803804087	2.51895701698126	0.0117703024261827	0.195808796057313
CATSPER2	58.4391263053578	1.10563598576037	0.438955121093415	2.51879049276448	0.0117758701532405	0.195808796057313
ABRA	4.10115527761633	-2.57301784686009	1.0216490585126	-2.51849480545315	0.0117857621971168	0.195844095889861
NSA2	3710.53581729347	0.528917372881562	0.210053148506639	2.51801687640423	0.0118017666141106	0.195980851652503
SLC45A1	324.533589312463	-1.36873647826869	0.543723205739393	-2.51734055824853	0.0118244474264832	0.196228222993277
FAM98C	760.799857345853	0.420072583782045	0.16690420508189	2.51684841359114	0.0118409761397755	0.196307799079009
SLC7A9	36.1158474194443	1.4351501807324	0.570259079978462	2.51666344494962	0.0118471936202521	0.196307799079009
RP11.274B21.10	30.8199116424677	1.30824141072022	0.519864930947516	2.51650252371476	0.0118526051332217	0.196307799079009
BACE1	3831.35657090438	-0.730185093676496	0.290261320035362	-2.51561280568675	0.0118825644491989	0.196624260376205
OLR1	60.1641421015455	-1.7037655154971	0.677314446964401	-2.51547198370428	0.0118873124727601	0.196624260376205
DUXAP10	98.5797210003873	-1.30668434011566	0.51955683419079	-2.51499788690264	0.0119033097227376	0.196759758354603
METTL18	349.381923767128	0.562226893055487	0.223614603792096	2.51426733102912	0.0119279979352041	0.197038644790711
CACNA1B	5.81672316860193	1.83708165543225	0.73074548068861	2.51398291741893	0.011937621604809	0.197068477677816
RBBP4	7285.46467648029	-0.582751909040994	0.231840545715161	-2.51358927422886	0.0119509526201905	0.19715943301686
FAM83A	7.37254452380019	-2.29328896492608	0.91246243220134	-2.51329685913037	0.0119608640141915	0.197193891477919
SCUBE1	583.584861197603	2.96973596392602	1.18213649108493	2.51217688170719	0.0119988930299637	0.197583418425163
CTD.2538C1.2	86.6484612707403	0.619616702079842	0.246649011195368	2.51213941250731	0.0120001671536387	0.197583418425163
BRPF3	1623.61078813939	-0.502952987000464	0.200264971523215	-2.51143763772068	0.0120240528665639	0.197847470404923
RP11.764K9.2	38.9829253817044	-1.17206633933891	0.466741305564554	-2.51116908952641	0.0120332043570766	0.197868894607427
STAT6	7730.40222806765	0.43873804758815	0.174769470235412	2.51038151570281	0.0120600786341067	0.198109268723292
NDUFA12	1688.76659609709	0.504772569277791	0.201082163574844	2.51028017753505	0.0120635404431233	0.198109268723292
KIAA2012	21.987743765451	1.92613910943539	0.76762274792278	2.5092261982173	0.012099597639535	0.198572042511327
RP11.689J19.1	2.61451524517436	2.39719599978321	0.955565025930945	2.5086686250868	0.0121187111192284	NA
AC016700.5	19.8849795088983	-1.08950278883721	0.434426887052557	-2.50790828401329	0.0121448185610967	0.199184506368332
ASTN1	26.7231875402284	1.60618905290187	0.64056991962811	2.50743752350152	0.0121610077958056	0.199320341038146
RP11.428G5.5	8.83720287205273	2.02075074158079	0.806068463352638	2.50692197183349	0.0121787593148056	0.1994804653927
RP11.327L3.3	5.23692270970675	1.97886830871023	0.789447284671685	2.50665034528961	0.0121881212157633	0.1994804653927
CYP4A11	5.11281173341058	2.18493367167486	0.871777885503261	2.50629628028881	0.0122003340203236	0.1994804653927
NXT2	855.873104040532	-0.965365272674743	0.385185376438766	-2.50623552119251	0.012202430880496	0.1994804653927
MASTL	939.585161358707	-0.778153779863831	0.310546455389588	-2.50575643791399	0.0122189757361104	0.199621477871595
ZNHIT6	1613.12529010684	-0.688141739432253	0.274666365497966	-2.50537315766589	0.0122322263998084	0.199708525315007
FDFT1	3730.26015321612	-0.817823508651757	0.326460523197848	-2.50512221398397	0.012240908853887	0.199720925817984
RP11.304F15.3	15.8297201146474	1.202747136934	0.480170050458885	2.50483580928166	0.0122508249032737	0.199753424425435
CPO	14.0922786993759	1.95820980516723	0.781946969251855	2.5042744356958	0.0122702817134842	0.199941345464453
RP11.70P17.1	12.017114402892	1.08902272648291	0.435114555943556	2.50284140488322	0.0123200737418241	0.200623009614924
ZNF99	10.2618830358219	-1.88562074955866	0.753641143915046	-2.50201407497893	0.0123489015370301	0.200912342320263
LMO4	6452.25086637126	-1.00111979011939	0.400152216903153	-2.50184741663368	0.0123547158684544	0.200912342320263
AC116035.1	6.85829604758691	1.92163471940159	0.76814819063082	2.50164583193707	0.0123617519413967	0.200912342320263
SFXN5	1086.82454892819	-0.646834919210691	0.258639517398866	-2.5009129529621	0.0123873621243629	0.201198855947771
RP5.1024N4.4	17.2214834933672	1.60168293402059	0.640676559679289	2.4999867871276	0.0124197938575982	0.201384065789537
GPR137C	266.570123152132	-1.16861163830402	0.467474368285632	-2.49984109843212	0.0124249023069978	0.201384065789537
AC010492.2	3.90296969571098	2.10914680090817	0.843727835267591	2.4997952097186	0.0124265117407979	0.201384065789537
C10orf82	2.36645370248645	1.85291390349571	0.741239292760512	2.49975132402267	0.0124280510964004	NA
GPR55	52.8836726317157	1.61655227154748	0.64673989383475	2.49954005769208	0.0124354639386486	0.201384065789537
RAF1	5845.09215150604	-0.420353260307231	0.168188813495855	-2.49929380896423	0.0124441091733817	0.201384065789537
LRRC15	574.151042200134	2.15807537119333	0.863672240430766	2.49872031329497	0.0124642639428501	0.201384065789537
TSPAN11	1178.2029142884	-2.18646140517458	0.875048617026148	-2.49867420236063	0.0124658857073662	0.201384065789537
CDKL4	2.24152182110124	1.72272926698495	0.689473569507087	2.49861538306182	0.012467954708114	NA
EPHA5.AS1	11.2101324473403	-3.24271316078967	1.29791816375208	-2.49839570117077	0.0124756848269519	0.201384065789537
ZNF630	172.105095018775	1.22813282355022	0.49163520806945	2.49805710289311	0.0124876076620545	0.201384065789537
RIOK1	1230.55173558685	-0.486665876687144	0.194821513736553	-2.49800890750308	0.0124893055542118	0.201384065789537
BEX5	43.0733492064213	1.92569908017241	0.770971364245114	2.49775694595081	0.0124981853237956	0.201384065789537
POP4	2505.70874039368	0.683814874907297	0.273778432832519	2.4976944598321	0.0125003883594149	0.201384065789537
AD000684.2	15.9840227273899	0.955400111523161	0.382522499662699	2.49763115206456	0.0125026207140839	0.201384065789537
KIAA1033	2853.62936381546	0.488090314781923	0.19550477432841	2.49656468215976	0.0125402796101824	0.201861665653562
CHST4	2.26391934936214	2.99079605598636	1.19797577146714	2.4965413551925	0.0125411044469616	NA
RNU6.574P	2.09188108279968	2.02137126928937	0.809874503524856	2.49590678616459	0.0125635611130796	NA
RP11.635L1.3	2.72941960064883	-1.52894410687265	0.612598539287753	-2.49583374562123	0.0125661482171535	0.202148988039569
DARS.AS1	46.2390147665408	-1.27256466549357	0.509940192604017	-2.49551748214864	0.0125773557477214	0.202200244699337
RP4.605O3.4	66.4701193848423	1.08881898637696	0.436432514108939	2.49481638323852	0.0126022323754956	0.202426631255803
TMEM201	1443.83511601845	-0.560988214320846	0.224893072559249	-2.49446640546498	0.0126146666965859	0.202426631255803
C14orf39	19.0340287870571	-2.03313324017809	0.815069891443995	-2.49442809938194	0.0126160283283539	0.202426631255803
AC018647.3	27.2600804327926	1.42494057326705	0.571361727921023	2.49393773442245	0.0126334703863752	0.202426631255803
HDGF	13965.059457583	-0.578267248516629	0.231878088449134	-2.4938417095994	0.012636888443878	0.202426631255803
EIF1	28569.0586403533	0.461796139588186	0.185180294490883	2.49376501348485	0.0126396190731765	0.202426631255803
RP11.204L24.2	9.20271643485113	-1.55940603092446	0.625474604914181	-2.49315642661212	0.0126613052536748	0.202556280366652
GSE1	2172.12250759687	-0.631177065069885	0.253170905434332	-2.4930868892184	0.0126637852212728	0.202556280366652
KLHL41	274.90468595969	-2.00424748662489	0.80401228488058	-2.49280704326872	0.0126737699385145	0.202587439828836
CLIP2	3878.41095165464	-0.813438236456641	0.326371952989962	-2.49236562457209	0.0126895336289886	0.20271087688184
SEPT10	3758.6168305157	-0.583106130597048	0.233996939659988	-2.49193913153025	0.0127047807851032	0.202730757622187
TBX1	114.1215000683	-2.18673472577491	0.877543826531746	-2.49188092908976	0.0127068627833646	0.202730757622187
CTD.2523D13.2	15.5318998700751	-1.55689387731421	0.624886891616427	-2.49148109554182	0.0127211736603839	0.202780206765584
RP11.473E2.4	29.5390560041379	2.13758130063908	0.858205763084	2.49075617129112	0.0127471565935569	0.202780206765584
RHOQP1	34.2479833395793	-1.2574522475709	0.504921394547171	-2.49039209102761	0.0127602237674036	0.202780206765584
AGBL5	1057.38134393584	-0.736459896597649	0.295732770328212	-2.49028843093819	0.0127639463903662	0.202780206765584
PAX8.AS1	1172.03429263152	1.51422525585775	0.608082745916071	2.49016316616019	0.0127684461595721	0.202780206765584
KIF3C	1208.62160771188	-1.0111651777352	0.406068835711541	-2.49013243275211	0.0127695503814346	0.202780206765584
PPARGC1A	221.96338600756	1.80368519381141	0.724355758486758	2.49005433128532	0.0127723568724688	0.202780206765584
PCDHAC2	21.1728921156474	1.5451560794058	0.620544657985261	2.48999980826924	0.0127743164211261	0.202780206765584
WDR4	640.562311026778	-0.786035154357935	0.315820354479854	-2.48886793776325	0.0128150558046588	0.203185693412997
TSR2	3784.24194197789	0.640470718567704	0.257336805673008	2.48884226604388	0.0128159811379984	0.203185693412997
TH	3.53259058805728	2.23274442483363	0.897209056395987	2.48854423494383	0.0128267279533327	0.203228257855191
RP11.41O4.1	12.5459037895759	1.37477481854489	0.552536096421335	2.48811765864533	0.0128421239032391	0.203238191096996
RP11.247A12.2	48.6609951706123	1.47930442950262	0.594556590786704	2.48808011285391	0.0128434797848903	0.203238191096996
LINC00961	210.060548956642	1.14666263190503	0.460921760814028	2.48775980956057	0.012855051967201	0.203293695099877
CUL2	2039.09515326864	-0.689778508764205	0.277305218699088	-2.48743428630784	0.0128668221921114	0.203352259447488
KIF1B	4214.20782399303	-0.608712119482666	0.244739419474487	-2.48718461778537	0.0128758561324547	0.203367532197317
RP11.403P17.6	25.1500237305606	0.811515657799963	0.326331675108003	2.48678176132116	0.0128904448187955	0.203470465242453
HS2ST1	3195.34181090704	-0.887534270524635	0.356971763680772	-2.48628704235085	0.0129083801378272	0.203626061648528
ENKUR	41.1138227781082	-1.63528871822266	0.657861909450359	-2.48576288538872	0.0129274067726763	0.203798667870934
HPX	81.4265617699026	1.25969275437158	0.506833329229575	2.48541814778916	0.0129399340958361	0.203868661679898
CTD.2263F21.1	15.6582813159699	1.49681907946498	0.60237866357655	2.48484743894778	0.0129606965317198	0.2039961535239
CBX1	5258.74792943528	-0.377938097343463	0.152103012120691	-2.48475090712586	0.0129642112799623	0.2039961535239
NAP1L6	3.07777885245323	3.52191612867231	1.41759936850602	2.48442275505807	0.0129761656861876	0.204056883728895
LINC01265	15.8866125736681	1.89607560749626	0.76344662695542	2.48357323295499	0.0130071586357584	0.204108169138168
EIF4EBP3	222.441362992899	0.772780919216617	0.311166724599621	2.48349472525044	0.0130100261195085	0.204108169138168
ALMS1.IT1	29.1685725497392	-1.31304629251777	0.52872073830214	-2.48344011762107	0.0130120209858203	0.204108169138168
CACNA1S	25.562191820422	-2.53240116276208	1.01981833877249	-2.48318849199182	0.0130212165947277	0.204108169138168
RP11.324O2.3	21.3285301298703	0.754163029004167	0.30373092716122	2.4829971582178	0.0130282126963098	0.204108169138168
ZPR1	2020.60184246183	-0.660070578064479	0.265846658662099	-2.48289965872189	0.0130317790348759	0.204108169138168
GTF3C4	2179.58307199209	-0.536654185288312	0.216150396600023	-2.48278140465949	0.0130361056931312	0.204108169138168
HOXC.AS3	26.6010318973008	-2.13414435951745	0.859663934400592	-2.4825333180989	0.013045186768275	0.204123568004145
AC010127.3	4.32379344126617	1.93629204696413	0.780045007211265	2.48228246968282	0.013054374628039	0.204140617632511
PRIMPOL	662.645345670456	-0.409569171654522	0.165030712169638	-2.48177546027627	0.0130729624078968	0.204304548281626
AP001056.1	6.33861833314065	-2.09046449103359	0.842616095951148	-2.48092162145783	0.0131043184178001	0.204598198966574
GGH	1724.37348661144	-1.10625284967965	0.445921915538913	-2.48082189085213	0.0131079852162415	0.204598198966574
CTD.2287O16.4	3.2183141934662	1.64909538274287	0.664893094520279	2.48024140472191	0.0131293459849123	0.204744773387625
SSRP1	10157.5387416626	-0.514709070693111	0.207533490375264	-2.48012535115374	0.0131336202224607	0.204744773387625
NRM	1804.91326441366	-0.495010457541063	0.19966322756697	-2.47922696418913	0.0131667493469948	0.205134374251573
RP11.850A17.1	4.24012862966798	-1.17493657133825	0.474196202169083	-2.47774352886804	0.0132216146091271	0.2057493167597
TSPEAR	22.982760396543	3.05486089118441	1.23293302353548	2.47771844282708	0.0132225441586287	0.2057493167597
VPREB3	13.5085421755539	2.67683984752221	1.08054771187691	2.47729907536665	0.0132380921489233	0.205803774931387
YME1L1	7448.27095104286	-0.688603306642287	0.277988674079307	-2.47709123014787	0.0132458039703852	0.205803774931387
RP5.1074L1.4	198.083146468644	1.03503778790809	0.417871783720423	2.47692672305576	0.013251910603648	0.205803774931387
SMARCA1	2910.18208889849	-1.07329073422344	0.433347486267125	-2.47674387930299	0.0132587008286485	0.205803774931387
RP11.124N19.3	3.31079795645402	-2.42942544178275	0.980990904624912	-2.47650149489577	0.0132677069420922	0.205816834828468
RN7SL526P	3.33175785128671	-1.92622314348107	0.778034399661125	-2.47575575619798	0.0132954497754349	0.205856781659585
GS1.124K5.9	3.26047909174192	1.90158555218001	0.768145120503623	2.47555507601645	0.0133029241936876	0.205856781659585
RP11.427M20.1	4.7946184705303	-1.93684405232794	0.782389552320704	-2.47554948373597	0.0133031325337252	0.205856781659585
LRTM2	3.10599021819975	-2.41159099757306	0.974208779375489	-2.47543550071372	0.0133073795922025	0.205856781659585
RSU1	6330.57048410311	-0.919897279855626	0.371684444408806	-2.47494156318217	0.0133257977795635	0.205856781659585
TMEM25	305.083900857149	-1.33018772211073	0.537506902441014	-2.47473607514595	0.013333466753884	0.205856781659585
HPD	27.5762398647342	1.52352613627513	0.615639110482732	2.47470654533386	0.0133345691501105	0.205856781659585
AF129075.5	14.6430835017856	0.856787448779596	0.346259735475369	2.4744068137271	0.0133457631814096	0.205856781659585
RP11.538I12.3	2.62618466530755	-2.60245995400471	1.05178605354714	-2.47432445527104	0.0133488404646344	NA
EZH1	1971.77575965467	0.568734815151627	0.229879265182025	2.47405878342828	0.0133587714375547	0.205856781659585
RP11.96D1.10	7.42853878663311	0.892293390654582	0.360718423044348	2.47365627495239	0.0133738298876132	0.205856781659585
ATPAF2	855.171885375361	0.645320855555831	0.260891828713462	2.47351884778495	0.0133789746800457	0.205856781659585
FAM193B	1922.67044391589	0.7130861867265	0.288312977663021	2.47330589315321	0.0133869504120061	0.205856781659585
AP2M1	23548.7733694688	-0.671953333639952	0.271683514263098	-2.47329447082032	0.0133873783282548	0.205856781659585
RP11.112J3.16	2.81530173117704	1.59846041632176	0.646370864817327	2.47297720755638	0.0133992688327985	0.205856781659585
ASUN	1385.63420885636	-0.692638766681137	0.280084672220182	-2.47296205533388	0.0133998369465972	0.205856781659585
TMPRSS9	34.6220497138128	1.14055340303631	0.461214926124671	2.47293254929918	0.0134009432998801	0.205856781659585
C9orf9	309.002148077851	-0.689674336172493	0.27896332129619	-2.4722760432015	0.0134255804314451	0.206072398672223
NDUFA5	2541.3471640456	0.357392331351577	0.144568992223485	2.47212300407472	0.0134313293802945	0.206072398672223
RP1.317E23.3	35.1640372089022	-0.533032613226871	0.215698706158621	-2.47119059135612	0.0134664026999399	0.206484841399078
MCF2L2	34.0132303714875	-1.30673690358103	0.528973440297379	-2.47032611475996	0.0134989928344226	0.20682260434051
AC000123.3	26.3567072987434	0.747382382243155	0.30256298807342	2.47017120964509	0.0135048400009711	0.20682260434051
DDX19A	2075.83496489246	-0.433889319265551	0.175673444459268	-2.46986287882659	0.0135164851518611	0.206875262725025
GPR108	3341.34756801199	0.460389566421317	0.186425756846257	2.46955986237993	0.0135279382311031	0.206924919253427
EPHA6	76.8695933737136	-2.16225930324708	0.875979882897657	-2.46838922384214	0.013572265317832	0.207388519548371
PKD1L1	88.9653759009646	1.09075193549215	0.441899642056397	2.46832500342452	0.0135747007797054	0.207388519548371
GAPDHP1	307.31834853556	-1.70225449635995	0.689863378556183	-2.46752407690144	0.0136051071527734	0.207727159967965
AC145110.1	9.61747545578007	2.30910159533371	0.935939853830215	2.46714741965951	0.0136194273571188	0.207819930277391
ATOH8	1053.14605735818	1.51500939479625	0.614312248220028	2.46618783718865	0.0136559700962811	0.208051987568046
EPB41L5	1084.53710056225	-1.37444403761439	0.557333345735296	-2.4661076681157	0.0136590270047354	0.208051987568046
FBXW12	5.37426358906973	1.77048534906231	0.717962763260793	2.46598492242306	0.0136637085636736	0.208051987568046
AGBL3	123.869945522177	0.880733588788992	0.357167827471636	2.46588164175827	0.0136676488183388	0.208051987568046
FARP1	3089.8413800337	-0.851287008479431	0.345306038744308	-2.46531167417489	0.013689411676532	0.20805615880807
SELL	429.202340210372	1.49388919683871	0.605986658196543	2.46521796582886	0.0136929926353471	0.20805615880807
RP11.520H14.7	10.9755448555529	1.22578345319586	0.497377448247434	2.46449342951725	0.0137207079138945	0.20805615880807
RIPK2	1380.42708357096	-0.859600637008301	0.348839354465302	-2.46417333940401	0.0137329679112421	0.20805615880807
ADAMTS3	254.196735490873	-1.78628792115842	0.72492636602125	-2.46409567217487	0.013735944156794	0.20805615880807
RWDD4P2	41.9454990163944	-0.489294002404411	0.198570809004528	-2.46407820392802	0.0137366136268743	0.20805615880807
RP11.732A21.3	14.8768687372481	-1.10291932156148	0.447599851866439	-2.46407436678639	0.013736760689082	0.20805615880807
POPDC3	243.930446089968	-2.04994254831804	0.831946568750676	-2.46403149591255	0.0137384038518266	0.20805615880807
GTF2H2B	26.2520768703641	-1.21678743412447	0.493880591232343	-2.46372798552037	0.0137500418195109	0.20805615880807
RP11.432J22.2	28.612591699286	-0.836340627875114	0.339462928200757	-2.4637171201814	0.0137504586073566	0.20805615880807
PNMA1	4316.10137947807	-1.02248244862804	0.41513338589272	-2.46302148508065	0.0137771659846747	0.208243358041177
PPWD1	1268.68090524981	0.488393087712752	0.198294807426335	2.46296458314566	0.0137793526345875	0.208243358041177
FSTL3	3138.50912958114	1.45210994775262	0.589660154301364	2.4626217952154	0.0137925319093589	0.208317641923978
POLR2J4	160.054684822338	0.825584663861744	0.335316973660082	2.4621022158534	0.0138125295629486	0.208382304782147
RP11.420C9.1	6.28687572375396	1.04534507004933	0.424633343245294	2.46175927227052	0.0138257428528011	0.208382304782147
AP1M2	10.0967831697329	-1.59674189988838	0.64864207908576	-2.46166869429584	0.0138292345986688	0.208382304782147
CTD.2576D5.4	5.39704093364588	2.24845110197211	0.913400111808409	2.46162779367355	0.0138308115570036	0.208382304782147
SEC16A	5784.01865393955	-0.500616750414207	0.203383886440013	-2.46143762505915	0.0138381457555266	0.208382304782147
CLMP	4495.89176863757	-1.11203959279626	0.451856407880656	-2.46104641519209	0.0138532442751252	0.208469767356597
HOXB9	109.433480229541	-1.59024417581003	0.646251012789013	-2.46072214099448	0.013865770474505	0.208469767356597
CLEC4M	2.9158239297603	-1.9945648983885	0.810586310539965	-2.4606446870042	0.0138687638788088	0.208469767356597
RP11.12M9.4	5.23956480796579	1.12767106762092	0.45833342373449	2.46037275316446	0.0138792779648156	0.208475919612172
RP11.434D12.1	16.4837006958372	1.04418848492611	0.424431254263982	2.46020639252136	0.0138857136238034	0.208475919612172
FOXE3	19.2443779598082	-1.77322308498579	0.720906153333057	-2.45971417609271	0.0139047704413416	0.208499602906889
FAM102B	2792.71056426017	-1.03726713488091	0.421731997760652	-2.45954098903731	0.0139114810991934	0.208499602906889
DNAH17	139.382461992872	0.718867867359081	0.292290984856052	2.45942538293854	0.0139159621993699	0.208499602906889
CALML6	12.2878072075067	0.978141477452735	0.39776273187139	2.45910790297217	0.0139282748492114	0.208499602906889
RP11.798K23.5	33.8648776203443	1.10470351880791	0.449231131927696	2.45909831330593	0.0139286469095209	0.208499602906889
RNU7.140P	2.04897297287009	1.88886436752911	0.76812907498854	2.4590455289787	0.0139306949953298	NA
SNORA53	4.96004098536069	1.04778192222496	0.426250013042592	2.45813933176411	0.0139658978581397	0.208658827660874
RP11.96O20.5	2.12511989155903	1.74691595412821	0.710691850688259	2.45804978970342	0.0139693805401204	NA
RP11.303E16.8	6.669234337448	-1.19815768232311	0.48745273603816	-2.45799765544717	0.013971408622244	0.208658827660874
GS1.184P14.2	5.56289408298094	1.64411363152341	0.669028791213112	2.45746319607894	0.013992214696878	0.208658827660874
ASIC2	13.9896929409094	2.19633494965244	0.893752532864437	2.45743074160952	0.013993479003708	0.208658827660874
C2orf27A	398.393970251672	-1.04245412382465	0.424206342479993	-2.45742229531568	0.0139938080568048	0.208658827660874
RP11.84C10.4	8.42384964373833	0.849557586939801	0.345713350684806	2.45740462512355	0.0139944964792223	0.208658827660874
RP11.651L5.3	46.2660507783131	0.908611892538329	0.369755060833971	2.45733456761615	0.0139972261811543	0.208658827660874
RBM15B	4027.52947647077	-0.531435318108377	0.216315994481314	-2.45675461670165	0.0140198412879174	0.208872434506987
CMPK1	7772.37311863491	-0.577738349033316	0.235191461343861	-2.45645971045111	0.0140313534816542	0.208920471686674
NAT14	1143.47164448118	-0.979012675596392	0.398680675778105	-2.45563112304265	0.0140637435414763	0.209279130574696
RP11.12A2.1	7.32218529764034	1.91230998744281	0.778903694500819	2.45513020536944	0.0140833567522747	0.209350385791293
PLCG1	6890.00973647317	-0.494803742565189	0.201585263254338	-2.45456306962727	0.0141055918359494	0.209350385791293
P2RX4	1257.76417888583	0.594575428919373	0.242254425348703	2.45434290029392	0.014114232123617	0.209350385791293
APPBP2	2505.90837487284	-0.368862932022315	0.150293637808073	-2.45428174739745	0.0141166328260727	0.209350385791293
GPR180	963.019507276403	-0.754484035367494	0.30746093992487	-2.45391832716005	0.0141309071875151	0.209350385791293
ZCCHC5	49.7490799775442	2.10680150440508	0.858558994531634	2.45388088392737	0.0141323786002765	0.209350385791293
SERBP1P3	4.54169617971515	1.64718289040206	0.671344235239729	2.45355929780774	0.0141450215901687	0.209350385791293
RP11.434D9.1	13.3150465900105	-2.04294984115381	0.832694034764897	-2.45342197237022	0.0141504235081289	0.209350385791293
C10orf55	121.151561104602	1.24002616531935	0.505445064728078	2.45333519278987	0.0141538380617003	0.209350385791293
PSMC3	6719.05368064888	-0.450621684846958	0.183683463778902	-2.45325123762565	0.0141571421736761	0.209350385791293
PIGL	609.041991751594	1.04112075530899	0.424441529841013	2.45291914695286	0.0141702184972282	0.209350385791293
RP11.345J4.5	204.020066793586	-0.836076486173256	0.340860623811017	-2.4528397467136	0.0141733465204294	0.209350385791293
CCDC152	329.309888406105	1.20551796098255	0.491494663406716	2.45275900378387	0.0141765280645831	0.209350385791293
RP5.968P14.2	57.5509054515337	-0.836526572171024	0.341084532215651	-2.45254912832614	0.0141848008144846	0.209350385791293
BBOX1.AS1	114.480808955311	-1.63431981130653	0.666453329754818	-2.45226445474851	0.0141960287207585	0.209393500288402
C12orf43	935.747911065929	0.445350516593973	0.181631983744104	2.45193884586656	0.0142088807835919	0.209460506896365
SCD	4514.37203573624	-1.24351482346263	0.507277085654091	-2.45135224639454	0.0142320602781765	0.209679588247968
RP11.770E5.3	6.89024916627476	1.31894799093854	0.538119654355821	2.45103106764877	0.0142447657938949	0.209744191666181
PSMA3.AS1	1194.17495282739	0.459995595447579	0.187753234488186	2.45000091051174	0.014285585346295	0.210188627166378
GSTO2	57.2454377854281	-0.895886361421872	0.365690488070662	-2.449848685287	0.0142916259506177	0.210188627166378
DMRTA2	9.92908549117836	-2.2706725372693	0.927187332748224	-2.4489900336957	0.0143257411987385	0.210532307370104
THSD7B	69.8146355257673	-1.98860244349461	0.812073337206909	-2.44879662018497	0.0143334356529055	0.210532307370104
AC104809.2	5.36048523438763	1.94339678736967	0.793666841894239	2.44863043885187	0.0143400496570322	0.210532307370104
RP11.37C7.3	18.1202365911753	0.887747489027893	0.36266798938955	2.44782422215473	0.0143721752439572	0.21088113710691
SNORD14A	13.5960762854742	1.19529520086644	0.488526925377958	2.44673351410811	0.0144157380761368	0.211397280641801
TNXA	46.4247465872365	-2.34414621007469	0.958265077040886	-2.44623984139482	0.0144354935960127	0.211563908469935
SF3B3	8488.19070222513	-0.588242515511988	0.240579889900568	-2.44510260502284	0.0144810937645649	0.211916257038023
GPIHBP1	1821.97959979698	1.88810365019093	0.772211970262998	2.44505877000053	0.0144828539725186	0.211916257038023
RP11.272P10.2	2.15557117748236	-1.4655015117684	0.5993792791173	-2.44503199030609	0.0144839294117036	NA
NIFK	1807.59553310911	-0.378908414801116	0.154972042533013	-2.44501142662812	0.0144847552712042	0.211916257038023
CTC.487M23.5	46.3916892966362	0.71859493788011	0.293951220754468	2.44460606775414	0.014501043400193	0.212031497698414
RP11.545P7.9	4.40348329639302	1.58786506949947	0.649784930949573	2.44367789074304	0.0145384002495513	0.212437910792617
IGSF22	70.0258856624032	0.979824350493482	0.401047061473776	2.44316551502161	0.0145590584442729	0.212437910792617
PAFAH1B2	3746.16147208526	-0.515466685377519	0.210998492602131	-2.44298752574269	0.0145662407504738	0.212437910792617
RP11.66N11.6	1.70918044057422	-2.88988235526858	1.18296269624557	-2.44291926063294	0.0145689962446631	NA
RAB43	105.911836259846	-0.929937626293798	0.380727781095971	-2.44252632055602	0.0145848660534806	0.212437910792617
RP11.60L3.1	14.6998913515649	-3.29938850794822	1.35084963592651	-2.44245430446095	0.0145877762447916	0.212437910792617
RP11.572M11.4	21.7707430878501	-0.875681654475303	0.358554503582378	-2.44225534953883	0.0145958187319397	0.212437910792617
ATAD3A	1883.16440659701	-0.853017830015505	0.349274796616891	-2.44225417430034	0.0145958662509983	0.212437910792617
CH17.264L24.1	52.9721193025969	0.931801694391344	0.381534975729842	2.44224449569503	0.0145962575965095	0.212437910792617
SIK3	1871.30210160444	-0.551472865459328	0.225832720407333	-2.44195289533173	0.0146080525278484	0.212482680450688
RP11.689P11.2	53.0114966957617	1.55804756704959	0.638129117192787	2.44158670255269	0.0146228765459935	0.212482680450688
KIF2C	2267.35541456267	-1.09741149538507	0.449474456736975	-2.44154362708816	0.0146246211751009	0.212482680450688
TAPT1	1131.90903788955	0.417513282693007	0.171067070853041	2.44064085864709	0.0146612270679506	0.212692029507663
LINC00693	21.3413077708335	-1.45940963443482	0.597971877395556	-2.44059911444536	0.0146629216840909	0.212692029507663
CREBRF	1694.27978473187	0.756995841327712	0.310225033843472	2.44015072526244	0.0146811350439196	0.212692029507663
CTB.89H12.4	399.641045367362	0.673739690688385	0.276105949254511	2.44014912575223	0.0146812000509588	0.212692029507663
RP11.325D8.1	3.05642749134661	-2.26504354932802	0.928239968818744	-2.44014869582751	0.0146812175239342	0.212692029507663
ENSG00000183048	296.366877456963	-0.665000789433369	0.272563607378041	-2.43980036744607	0.0146953802908742	0.212774926118528
ANKRD26	484.028416236607	-0.710659924898433	0.29134372712763	-2.43924910244287	0.0147178189177287	0.212836811327866
CCT6B	140.496063241082	0.779304020165116	0.319508850508471	2.43906864841121	0.0147251706555049	0.212836811327866
TGM2	7058.61573024528	-1.33932917793252	0.549132097879007	-2.43899269976315	0.0147282657881481	0.212836811327866
RP11.762H8.2	19.1359853561599	0.840982132302877	0.344825056294552	2.43886607701878	0.0147334273154208	0.212836811327866
PRSS37	2.20602161843318	2.33644519363636	0.958273265799124	2.43818259052437	0.0147613158366013	NA
COL13A1	461.045009359939	-1.96619450371584	0.806487688963894	-2.43797212359414	0.0147699129508695	0.213241675638899
GLI2	1866.4299007508	-1.44085177048584	0.591105691236826	-2.43755354050306	0.0147870242717797	0.213366518513464
HNRNPH3	6142.50509743396	-0.341292750177684	0.140035669157351	-2.43718441330966	0.0148021283712162	0.213462272300697
MCM3	7083.28605928016	-0.749903749039398	0.307789558015917	-2.43641712172905	0.0148335682359303	0.213571301267429
UGT8	41.4305335338251	-2.06489932883753	0.847525820564581	-2.43638515633894	0.014834879297478	0.213571301267429
RP11.43N16.4	58.4173261729406	0.78373849478264	0.321730307985883	2.43601076842605	0.0148502424335829	0.213571301267429
SERINC5	1741.90186353144	-0.955635922547458	0.392326085756318	-2.43582050045233	0.0148580555165511	0.213571301267429
BRAP	1439.16410267992	0.446066204716504	0.183148036054461	2.43555003005252	0.0148691682318075	0.213571301267429
TMC2	6.17648212474521	1.83192481723388	0.752184620789245	2.43547231172009	0.0148723627698351	0.213571301267429
LINC01435	2.83594383765897	2.60872643368052	1.07119832565644	2.43533468191509	0.0148780213955897	0.213571301267429
RFWD3	1851.44908862427	-0.700915457380595	0.287832969176306	-2.43514653441685	0.0148857601168734	0.213571301267429
AMN1	148.059404482384	-0.729784174701251	0.299688530021551	-2.43514216125913	0.0148859400320086	0.213571301267429
FASTKD1	517.788604414337	0.431579279278631	0.177290634122003	2.43430388421782	0.0149204628099712	0.213944838745025
GRM7	8.52604346964637	-2.70021372705527	1.1095330832058	-2.43364868333036	0.0149474950532077	0.214210605628915
NHS	336.949719770204	-1.2995716792607	0.534072584694826	-2.43332407710703	0.0149609036159679	0.214219686350517
LBHD1	182.179445686069	-0.416511231591517	0.171176835544275	-2.43322193839589	0.0149651248676317	0.214219686350517
FAM183DP	5.55616322361049	2.28455558686283	0.939304132085465	2.43217878940936	0.0150082968888786	0.214413541193554
PLEKHA5	1153.89446429945	-0.878844516889362	0.361352318033162	-2.43209873862967	0.015011614418262	0.214413541193554
MYL5	472.2058643439	0.756787459001166	0.31121596105616	2.43171158841883	0.0150276681298641	0.214413541193554
AC005785.5	6.15721850306676	1.0900299665708	0.448261541056913	2.43168299471046	0.0150288544064648	0.214413541193554
CTD.2547G23.4	59.7950748479451	0.850331154989499	0.349697490992936	2.43161926205149	0.0150314988011167	0.214413541193554
RP11.554A11.4	151.815471396508	1.51848298270087	0.62453500708784	2.4313816927276	0.0150413596360523	0.214413541193554
LDHAP4	173.577957323639	-1.07656522990723	0.442820491163007	-2.43115495193047	0.0150507763230924	0.214413541193554
PLCH1	31.9502776420609	-1.55900796978746	0.641281128971483	-2.43108349732336	0.0150537449534541	0.214413541193554
POU3F3	8.51113749686486	-2.17412544851421	0.894328683865283	-2.43101388531748	0.0150566375276453	0.214413541193554
IGF2BP3	385.584006021745	-2.33260628111881	0.959587241096926	-2.43084336808434	0.0150637250656055	0.214413541193554
FBXO7	5855.22121396447	0.39296838564915	0.161683740974258	2.4304755894516	0.0150790217659269	0.214510147108062
PABPC4L	201.663106711128	-1.14586352240431	0.471737058695783	-2.42903011599786	0.0151392747324541	0.21507076304817
TRIAP1	1390.81969373834	0.512592024996998	0.211036063414643	2.42893094527572	0.0151434163162383	0.21507076304817
RP11.566J3.2	17.1867720937169	2.44764994075215	1.00773427439019	2.42886443674181	0.0151461944153485	0.21507076304817
ATP1B2	436.354932484887	-1.982660660505	0.816342385660256	-2.42871213761788	0.0151525577266562	0.21507076304817
LDLR	3507.87759623243	-1.47767886222828	0.608596525048541	-2.42801067934199	0.0151818962253461	0.215296358752006
TGFB2.AS1	52.6280943529684	-1.73756328110372	0.715658078094533	-2.42792380088833	0.0151855333965831	0.215296358752006
IGLV2.8	31.981806484934	2.52065874883257	1.03840086199497	2.42744285091394	0.0152056822783305	0.215460842536343
DUX4L26	12.5787349463278	-1.97353162411672	0.813129150230046	-2.42708261480771	0.0152207893982983	0.2155537410968
GPR114	102.159761846209	1.87725834639101	0.773778877331384	2.42609148606552	0.0152624223069568	0.216021977267697
UQCRFS1	3374.61616338539	0.624359504464458	0.257385475349145	2.42577598295906	0.015275696210307	0.216055197448075
AC112721.2	10.9615121891256	-3.32936699890643	1.37257919447569	-2.42562834429252	0.015281911180971	0.216055197448075
LRRC4B	258.552073427035	-1.89386075275875	0.780963310655531	-2.42503165887405	0.015307051828224	0.216258454797978
PRKCA	2231.73066957407	-1.03774711461466	0.42795812427567	-2.42488004257676	0.0153134458034906	0.216258454797978
NET1	2129.25363521273	-1.05806901660653	0.436387191192191	-2.42461061635639	0.0153248138705955	0.216297820856647
MRO	257.074781601742	1.27602884344766	0.526412540267843	2.42400920540079	0.0153502163792757	0.216535117229313
ZMYM3	2152.73125236365	-0.502710478594124	0.207430430166239	-2.4235136483651	0.0153711756575315	0.21670950557889
SLC22A7	2.64364757376773	2.1239076872627	0.876440054388579	2.4233348038211	0.0153787459607602	NA
AC004754.3	12.2077085262608	0.77789854358343	0.321011595903657	2.42327240981318	0.0153813878062089	0.216732265969208
FAM160B1	1642.41580362847	0.426795276965722	0.176138857241476	2.42306146213161	0.0153903225708287	0.216737011936006
IL11RA	1951.03417327875	-1.51460037183557	0.625209534931026	-2.42254842131073	0.0154120716674677	0.216922112000852
NOMO1	2906.37162395068	-0.801992570705894	0.331190840385396	-2.4215421228819	0.015454809783032	0.217244993135213
CA15P1	2.34355678131776	1.88763489050162	0.779520781932479	2.42153247771285	0.0154552199234778	NA
UBE3B	2404.65921473384	0.489070300830933	0.201978087241808	2.42140277447731	0.0154607362102957	0.217244993135213
C20orf203	7.28727776061271	1.61831620693918	0.668392942876916	2.42120480801843	0.0154691590771117	0.217244993135213
P2RX2	6.67750104726886	2.32754066235662	0.961438419557697	2.42089416754053	0.0154823840189467	0.217244993135213
CRLF2	22.7628671297451	-2.02605957571012	0.836974950956418	-2.42069320401397	0.0154909449679827	0.217244993135213
ATP2A1.AS1	71.276269766657	-1.04829731561093	0.433058035131651	-2.42068552149654	0.0154912723221658	0.217244993135213
ANGPTL2	29820.2428520937	1.02201654582108	0.4222179315093	2.42059010181705	0.0154953386883971	0.217244993135213
AC104809.3	19.7783285854456	1.44480615679054	0.597035082940222	2.41996860498598	0.0155218471360984	0.217315327720585
B3GNT5	691.999966356447	-1.32914289763761	0.549304650035548	-2.41968258879949	0.0155340598692643	0.217315327720585
KLHL42	1732.88640801666	-0.495058341592995	0.204612596196014	-2.41949103230546	0.0155422439530058	0.217315327720585
IGF2	203307.63771599	2.64109410024741	1.09162884405147	2.41940666430657	0.0155458497053863	0.217315327720585
RP3.331H24.7	42.631463079758	0.810748931187357	0.335120185655743	2.41927811540487	0.0155513450936387	0.217315327720585
CTSB	87606.4113634222	-0.758109914998246	0.31336426418911	-2.4192609101743	0.015552080736589	0.217315327720585
RP11.411B10.8	3.054761179273	1.40143829373875	0.579336284192242	2.41904111994772	0.0155614809878257	0.217326212044937
LINC01426	508.969079309435	-2.038075729339	0.842811490932972	-2.41818692704688	0.0155980616207378	0.217697818048294
RP11.1079K10.3	4.17076466727437	-1.16533609622303	0.481949389313278	-2.4179636328277	0.0156076366146386	0.217697818048294
PTCHD1	40.1584597443719	2.10482576346235	0.870548596521991	2.41781535444607	0.0156139977400554	0.217697818048294
KCTD21.AS1	110.49948779306	-1.09252819915369	0.452059141491266	-2.41678156435377	0.0156584106402013	0.218086977424962
SNHG20	273.010515831865	0.687697685344513	0.284553225646039	2.41676292294065	0.0156592125174223	0.218086977424962
RP11.161H23.9	8.89229711003829	-2.16638488788403	0.89663314191129	-2.41613296076263	0.0156863321572483	0.218151989769596
FKBP5	4498.78993180276	1.17490268958761	0.486310985824519	2.41594930781919	0.0156942461234516	0.218151989769596
NELFB	5587.47794301753	-0.447258359074995	0.18512926130363	-2.41592472160005	0.0156953058584827	0.218151989769596
LL22NC03.N64E9.1	2.8607018018161	-2.1785264960444	0.901817004755015	-2.41570793692919	0.0157046526109117	0.218151989769596
UQCRQ	4090.39846222496	0.521425126673763	0.215853356724281	2.41564520740718	0.015707358131045	0.218151989769596
BAALC.AS1	133.008203564876	-1.5209252607702	0.629703167857612	-2.415305080876	0.0157220349056222	0.218151989769596
CNOT2	3813.97205396738	0.639707635505028	0.264870407151682	2.41517216809611	0.0157277734923601	0.218151989769596
ESRRG	19.066512168956	-1.96209269205004	0.812480441164701	-2.41494144675945	0.0157377393958315	0.218151989769596
SLC23A1	15.917941478104	0.945016346273746	0.391335709272439	2.41484823358107	0.0157417672719333	0.218151989769596
RP11.798M19.6	147.528234859306	-0.682671568883773	0.282739237248198	-2.41449179649764	0.0157571777977788	0.218245570289235
RNF157	915.869625261998	1.37322474603349	0.568974598703024	2.41350800046918	0.0157997810108442	0.218643966058601
LY9	137.721490329092	1.73510243172514	0.718965303078017	2.41333263830238	0.0158073856858802	0.218643966058601
PDE5A	1081.2460613774	-1.30873541410604	0.542334501179744	-2.41315168269608	0.0158152362981385	0.218643966058601
RPS4XP2	9.44140304131653	1.60651073193453	0.665765677658932	2.41302726446276	0.0158206360715205	0.218643966058601
AC005330.2	76.2521324873975	1.80970446631285	0.750064643428757	2.41273133211583	0.0158334861032611	0.218701653529318
AP000347.2	36.0832378041938	0.793658109900242	0.329019025825225	2.41219518509496	0.0158567901641896	0.218903596089207
DEPDC1	1383.63500312301	-1.31832283109976	0.546592215278485	-2.4118946341526	0.0158698670418611	0.218964208205383
AHSA1	5631.94014702938	-0.685272165254377	0.28422856210997	-2.41098980400584	0.0159092931904752	0.219388108722921
GCLC	1322.19280783306	-0.546310699027688	0.226623581941831	-2.41065247643961	0.0159240135840444	0.219471041239251
RP1.232L22__B.1	10.811237721281	-1.34899349655593	0.559685940983713	-2.41026868422836	0.0159407761781357	0.219582014152155
AC006547.13	175.289445041438	0.740145448156453	0.307167846164159	2.4095798352569	0.015970901417001	0.219876833926685
POLR2F	20.6348541855794	1.28777672354336	0.534507099201803	2.40927898893474	0.0159840739416758	0.219938065459478
SPATA2L	400.501269056677	-0.969756165584998	0.402701625132758	-2.40812578112964	0.0160346555509708	0.220321059682113
APH1B	1172.39487044637	0.839459100265252	0.348602416824941	2.40807022484531	0.0160370958907684	0.220321059682113
NOG	9.3731864056437	-1.93637552818432	0.804150269345909	-2.40797721769012	0.0160411820111407	0.220321059682113
DNMT3B	308.92188167152	-0.838695950691861	0.348324123990199	-2.40780322960192	0.0160488283566852	0.220321059682113
METTL7A	5595.26405758209	1.43595370179179	0.596413222391924	2.40764900555504	0.0160556088002238	0.220321059682113
IL23A	34.2884817061155	1.04272183359212	0.433146214312942	2.40732066710104	0.0160700525531649	0.220399284417945
AP003068.23	72.8624367906862	-1.24463085507805	0.517160532624536	-2.40666248981081	0.0160990404629055	0.22061117153217
SPHK1	2978.36230847997	-1.50468004973257	0.625237768006131	-2.40657255004119	0.0161030052213263	0.22061117153217
SP5	44.8744140740219	2.23942526537753	0.930836477054358	2.40582027088605	0.0161362010972631	0.220862578930081
CTC.524C5.2	138.546424511638	0.957509654691102	0.398007199150257	2.40575963634673	0.016138879339464	0.220862578930081
CPA6	23.5826492347225	-2.67625872440896	1.11275456185743	-2.40507549116823	0.0161691252823813	0.221156322186234
ZNF622	2096.26162165846	0.65636072354679	0.272934998314406	2.40482432667245	0.016180241718159	0.221156322186234
SOX9	867.048111748167	-1.8873593897018	0.784869478702941	-2.40467930135443	0.0161866635367186	0.221156322186234
RP11.218F10.3	19.9284328761305	0.854425486942792	0.355424521162725	2.40395762269764	0.016218653272157	0.221465056097911
RP11.424I19.2	13.2775712178702	-0.88715005843506	0.369065604439164	-2.40377333396642	0.0162268311096811	0.221465056097911
SLC2A13	684.595535547365	0.822949987612279	0.342403925142325	2.40344787890562	0.0162412820730985	0.221542336849927
FLJ26850	9.83228473644716	1.2703922778761	0.52873532031611	2.40269985579284	0.0162745389187323	0.221694725470066
XPO5	2549.6621580676	-0.497009332178694	0.206854636588724	-2.40269853446344	0.0162745977174806	0.221694725470066
C6orf223	6.39825971161827	-2.0431354235185	0.850384019235523	-2.40260326782156	0.0162788375454257	0.221694725470066
RP11.385F5.5	56.6146383461526	0.864555955763062	0.359905612023972	2.40217414477404	0.0162979476386729	0.221835131790317
HAUS5	1315.55048381423	0.609184356721528	0.253668368324702	2.40149909405242	0.0163280494996376	0.222011899088442
SNX2	4987.75445508541	0.423697332122309	0.176431174799124	2.4014879037376	0.0163285489094721	0.222011899088442
AC144831.1	429.827814716849	1.49119504701964	0.621059215851674	2.40105131517084	0.0163480437934947	0.222157136359253
RP1.102K2.8	5.45385671508382	-1.20863899799412	0.503474683410234	-2.40059537811818	0.0163684244670139	0.222314247825694
DCAF12L1	1.28990598102539	-3.22265097915806	1.34278047642166	-2.39998349376215	0.0163958111627233	NA
LINC00847	1252.10659705838	0.831134689405036	0.34645291485307	2.39898310498417	0.0164406732373697	0.223175277850089
AMOTL1	4785.21888895	-0.757449156425422	0.315818757662123	-2.39836658858552	0.0164683743653644	0.223203977787961
ILF2	9711.78437239328	-0.489416365419723	0.204063437063924	-2.39835402393232	0.0164689393425874	0.223203977787961
TCF3	5583.06958892443	-0.676261809360917	0.281970211085153	-2.39834487039729	0.0164693509475408	0.223203977787961
BGLAP	32.2458123466694	0.86564957079542	0.361031546938333	2.39771171837036	0.0164978436909773	0.223469985901212
GMEB1	1123.12413250838	-0.533018639706092	0.222352627483565	-2.39717715836522	0.016521933352707	0.223570256084908
CUBN	335.748616080994	-1.13701453210315	0.47431854664285	-2.39715385398854	0.0165229842544503	0.223570256084908
RP11.170M17.1	1.93582658153709	2.84828809215337	1.1884504667342	2.39664013930704	0.0165461649329926	NA
GSDMC	31.5639004114387	-1.46180649295135	0.610150752542952	-2.39581199704976	0.0165835938671499	0.224269975430856
SKINTL	8.7863560699973	1.82940858105496	0.763660251833469	2.39557915534132	0.0165941308249845	0.224292144684295
ULBP3	50.327005751197	-1.26417567821212	0.527883271956272	-2.39480155059137	0.0166293629643024	0.224462367478409
AC007292.3	22.1246483063746	0.636681300332167	0.265874643749589	2.39466724375498	0.016635454859554	0.224462367478409
SMARCC1	4369.22366744052	-0.734899685896347	0.306915683713492	-2.39446768247393	0.0166445101878811	0.224462367478409
RP11.428J1.5	104.803167488617	-0.998172456089507	0.416877694491022	-2.39440120994769	0.0166475274179435	0.224462367478409
CTB.58E17.5	30.0598113756366	-1.10908085312939	0.463213431971159	-2.39431928476211	0.0166512467147186	0.224462367478409
ABCA6	2065.47396092357	1.78066933308676	0.743873197297595	2.39378074052906	0.0166757140899624	0.224584639061233
IL18R1	317.01774759056	1.4910826905325	0.622912467977392	2.39372747727153	0.0166781356840142	0.224584639061233
MLF2	7469.22348116582	-0.609838672698836	0.254845354435724	-2.39297543425555	0.0167123600103567	0.224810758724575
AKAP1	1788.01933591876	-0.674930130458244	0.282066270316537	-2.39280694462628	0.0167200361650534	0.224810758724575
RP11.676M6.1	198.593565324364	-0.520690539494537	0.217609867128883	-2.39277081671186	0.0167216825058941	0.224810758724575
EXO5	484.408790113095	-0.494674037491846	0.206759286582726	-2.39251182216631	0.0167334889963707	0.224816410213077
PIAS3	2187.86076542664	-0.843988816769768	0.352784385740805	-2.39236443244928	0.0167402111512529	0.224816410213077
TRDMT1	294.033164625765	-0.690125064994581	0.288510824328896	-2.39202486284485	0.0167557072763718	0.224816410213077
SLC16A3	4216.28825844887	-1.39704789976555	0.584055121955268	-2.39197953626121	0.0167577766895577	0.224816410213077
TRAV12.3	8.74329708627196	1.71025555090575	0.715151687968039	2.39145845514971	0.0167815830915897	0.22501603541106
RP11.320M2.1	41.7604463743174	-0.787292790680958	0.329456104874964	-2.38967431178656	0.0168633194663451	0.225991790062535
BOP1	2616.72786158421	-0.792698245913153	0.331777092718541	-2.38924947897361	0.0168828336256107	0.226015286788997
SH3BP5L	1856.63548502423	-0.652296363635187	0.273013507488227	-2.38924575430875	0.0168830048010029	0.226015286788997
RMDN2.AS1	5.34627930685129	-1.64061257135378	0.687171231925256	-2.38748727410671	0.0169639900594637	0.226978907334905
RP11.313P13.5	3.18741106445868	1.26982494352789	0.531952030907081	2.38710423073786	0.0169816759360603	0.227095006364037
AC004932.1	7.23513299296676	1.44726597796257	0.60639012586284	2.38669120131737	0.0170007644569498	0.227171241076309
PLAG1	255.582006321868	-2.03229459045785	0.851547093827986	-2.3865909533224	0.0170054003455647	0.227171241076309
RP1.95L4.4	70.9382187466454	-1.04302920002181	0.437217761509636	-2.38560573664806	0.0170510199603182	0.227660016504079
RP11.54O7.1	8.81058116847865	-2.55214943857239	1.06993991933624	-2.38532032729059	0.0170642556403615	0.227716122912776
PCNT	2991.88318600188	-0.633430565511185	0.265641270745869	-2.38453371244851	0.0171007810820976	0.227909701813802
CTC.429L19.3	3.28891782553013	1.64321291082549	0.689118371212477	2.38451473574027	0.0171016630876785	0.227909701813802
TGFBR3L	17.9483640200365	-1.75929208125789	0.737826892711344	-2.38442390571167	0.0171058852678401	0.227909701813802
TIAF1	83.5962266294304	0.811159300942425	0.340339395981486	2.38338350047067	0.0171543131631374	0.228313635003336
CMB9.22P13.1	201.723130882758	-0.805954661830211	0.338155689177691	-2.38338341664483	0.0171543170698317	0.228313635003336
TSNARE1	572.364315449037	-1.0001671786915	0.419703912162906	-2.38303039287204	0.0171707766303661	0.228412104115181
SLC28A3	77.4284035036781	1.84973258632981	0.77630797511977	2.38273036682952	0.0171847760866481	0.228477761388305
TPGS2	2812.11518183799	-0.582525457685804	0.244560338861935	-2.38192938559292	0.0172221995726248	0.228692176803777
NFE2	18.0146785952072	-1.34583878678533	0.565027688690531	-2.38189882323174	0.0172236289235919	0.228692176803777
RP11.793H13.8	5.4195772946637	1.40518339369781	0.590017611355099	2.38159567893322	0.0172378121156564	0.228692176803777
BCDIN3D	284.793042918529	0.496682390803999	0.208558872190094	2.38149729900386	0.0172424172121476	0.228692176803777
EPHA1	106.385768572268	1.06348896249103	0.446607232205376	2.38126229447617	0.0172534219794567	0.228692176803777
CTD.2655K5.1	7.60304694230435	1.18643735769855	0.498247388903286	2.38122142558552	0.0172553364122812	0.228692176803777
NEURL3	25.3785995917111	1.20895300954636	0.507809996017224	2.38071920408861	0.0172788773309668	0.228883835921709
AFTPH	1112.32565938606	0.403109086516065	0.169352940133324	2.38028986209932	0.0172990244549196	0.229030361585931
AC093642.1	2.04227222769226	2.17081601416549	0.912002211567837	2.38027494520392	0.0172997248091538	NA
HIF3A	461.510549558986	1.93586025563176	0.813559208588483	2.37949522935209	0.0173363674206584	0.229232738032039
RP11.876N24.1	4.04720011926498	1.49306529966765	0.627535269280986	2.37925320337512	0.0173477552238965	0.229232738032039
AC009237.8	108.656642304206	-1.16726766259105	0.490609128233492	-2.37922124847933	0.0173492592553833	0.229232738032039
SH3TC1	1839.3649697779	0.893761431582944	0.375704330203326	2.37889574256239	0.0173645864648415	0.229232738032039
SOX18	1076.76649370193	1.0754293093222	0.452083268057382	2.37883015211635	0.0173676763818509	0.229232738032039
RP11.230F18.5	36.5578732113023	-0.827645327771267	0.347924864477323	-2.3788047715837	0.0173688721692001	0.229232738032039
NDC1	1791.84314724667	-0.624545190427329	0.262585016006445	-2.37844946343777	0.0173856198639084	0.22924307015735
TMSB4XP2	19.6231408498115	1.52253396915403	0.640170761328026	2.37832475509434	0.0173915014342321	0.22924307015735
SMCO2	22.6443678842778	-1.47806260990571	0.621502264657023	-2.37820953190151	0.0173969372108462	0.22924307015735
CEBPA	801.377190447137	1.30342128929827	0.548245980715928	2.37743884158748	0.0174333336686181	0.229490107332623
RP5.940J5.3	3.20129917373644	-1.18917883479367	0.500196559190944	-2.37742306088058	0.017434079621975	0.229490107332623
NUP107	4047.03875953106	1.19990534989756	0.50474999584723	2.37722706244603	0.0174433467924894	0.229490107332623
CLCN3	2584.71017142052	-0.492068217098358	0.207008632234575	-2.37704201890848	0.0174520999586099	0.229490107332623
RP13.714J12.1	5.4531542270357	2.37232370634127	0.998104490042068	2.37682900939689	0.017462180775066	0.229493254930327
FAF1	2846.92000167306	-0.689379493414576	0.290094662850601	-2.37639495549633	0.0174827384664502	0.229493254930327
STAR	9.15369719435085	1.34287547235639	0.565091615153863	2.37638541493976	0.0174831905651842	0.229493254930327
RP11.411B10.7	7.55291413360778	2.12400078242355	0.893851093943351	2.37623559093408	0.0174902916258208	0.229493254930327
FZD6	1346.63105074875	-1.32120761852435	0.556046030814357	-2.37607598167615	0.0174978592500828	0.229493254930327
RP11.361L15.5	10.8875623563308	1.49275472534352	0.628331548761637	2.3757437109207	0.0175136225592493	0.229580549908245
HERC2P3	130.361583920923	-1.67622272345277	0.705748218733568	-2.37510018298122	0.0175441876783018	0.229861685548145
NKPD1	10.2636805252461	1.03745338793501	0.436850384447975	2.37484828872471	0.0175561644218481	0.229899113114777
A1CF	4.41045035692442	1.82210371824196	0.767435298075341	2.37427666255596	0.0175833699572967	0.230135820292594
AMBRA1	2179.72216743724	-0.44397709348646	0.187053825175232	-2.37352587187427	0.0176191586514032	0.230353199637512
RP11.330L19.1	7.55048461158581	1.518493805915	0.639785464589111	2.37344217704324	0.0176231521698602	0.230353199637512
ZFP14	540.38397666412	0.716052868300208	0.301720766475099	2.37323031048081	0.0176332649789502	0.230353199637512
ADD3	8945.21335429936	0.912961168271971	0.384702436601884	2.37316190751546	0.0176365310734845	0.230353199637512
PCYT2	1370.22158760979	-0.602718222044112	0.254000301635372	-2.37290356808056	0.0176488710094869	0.230394997621515
DIS3	1661.27365027347	-0.558718842015379	0.235530733405786	-2.37216958456451	0.0176839720375268	0.230733730394398
ALKBH7	2252.90925613471	0.553761410641147	0.233482477781485	2.37174719020847	0.0177041997740275	0.230878152045363
XIRP2	35.4205450092044	-2.43729451286603	1.0277288745111	-2.37153452949882	0.0177143914005629	0.230885225547725
TNRC18	8272.37114195728	-0.468216515725232	0.197467261023586	-2.37110958696747	0.0177347718986935	0.230885225547725
RP11.386M24.6	8.70293391892565	1.63151949379199	0.688121450308855	2.3709760726972	0.0177411795639237	0.230885225547725
RP11.138I1.3	11.1212484463346	1.21247669637996	0.511392145868875	2.37093335549751	0.0177432300915969	0.230885225547725
ZNF30	195.903567629845	0.883308311824554	0.37260296289356	2.37064221112188	0.017757211249894	0.230885225547725
RP1.191J18.66	56.7503310965766	-0.837089131456612	0.35311419053911	-2.3705904602095	0.0177596974110218	0.230885225547725
DNAL1	1043.30605150328	-0.72056116949908	0.30400510639985	-2.37022719135298	0.0177771577660456	0.230993089157978
RP11.51B23.3	10.8672730898717	1.09177892381723	0.460757067160135	2.36953267053805	0.0178105814727388	0.231248190267664
CTB.39G8.3	17.8591816509395	1.12978869823118	0.476856220059301	2.36924391610259	0.0178244939327701	0.231248190267664
CTD.2591A1.1	12.4575476266983	1.29842810571071	0.548058308098195	2.36914227286574	0.0178293934647879	0.231248190267664
ROBO1	4001.40191757905	-0.728913310219279	0.307680727748251	-2.36905741725782	0.0178334846826539	0.231248190267664
RP11.122K13.12	38.5881510726635	-1.12877821420565	0.476572639119081	-2.36853340194296	0.0178587677213735	0.231456975177574
ABCA2	2352.46765088238	-0.770548263906221	0.325435847193232	-2.36774243081063	0.0178969905002642	0.23183316368482
CLEC11A	880.249422059305	-1.40325624287643	0.592760478894696	-2.36732422764257	0.0179172286416381	0.231884080531892
PALD1	1352.90834069455	0.974816704158182	0.41183945296474	2.36698232075799	0.0179337894637252	0.231884080531892
FOXF1	240.578592630885	1.70128977598812	0.718779379408184	2.36691511293618	0.0179370463616023	0.231884080531892
DNAAF5	1892.08687083505	-0.747467522007448	0.315800040511691	-2.36690128600467	0.0179377164803709	0.231884080531892
RP11.84D1.1	3.07878570550503	-2.72752622131164	1.15270550491921	-2.36619519007399	0.0179719664120128	0.232207754645833
RP11.504P24.8	177.59152841952	0.756397849897131	0.319810822884447	2.36514150170093	0.0180231832078925	0.232750206098644
WASF2	13418.6093935432	-0.510329664737529	0.215847639479257	-2.36430505317883	0.0180639315710388	0.233082524951832
[truncated: 24,766 more rows]
