# Supplementary material for: Identification of Subtype-Specific Metastasis-Related Genetic Signatures in Sarcoma
Source: Front Oncol. 2020 Oct 6;10:544956. doi: 10.3389/fonc.2020.544956 (PMC7573283; doi:10.3389/fonc.2020.544956)
Supplement: Supplementary file 5 [file Table_5.XLS]

ID	Description	GeneRatio	BgRatio	pvalue	p.adjust	qvalue	geneID	Count
GO:0006936	muscle contraction	34/391	351/18493	1.4270132253401e-13	5.12868553187232e-10	4.56794444027289e-10	ACTA1/TNNC1/MYOCD/NOS1/TNNI1/MYBPC1/DRD2/CHRNA1/SLC8A3/DRD1/MYH14/CHRNG/MYH7/SORBS1/JSRP1/NMUR1/MYBPH/TTN/TRIM72/KCNIP2/CHRNB2/CSRP3/MYH11/CHRND/ATP1A2/ACTG2/ACTC1/P2RX1/SYNM/TMOD1/ACTN3/FLNA/ACTN2/SMPX	34
GO:0014706	striated muscle tissue development	32/391	379/18493	3.00016415503557e-11	5.39129498659891e-08	4.80184168182271e-08	ACTA1/BMP5/TNNC1/MYOCD/MEGF10/TNNI1/MYBPC1/DMRTA2/CHRNA1/ALDH1A2/MYH14/RBM24/MYH7/TTN/NRAP/CSRP3/ANKRD1/MYH11/KCNAB1/CHRND/FGFR2/ACTC1/MYOD1/ACTN3/NEBL/COL19A1/NOX4/ACTN2/EYA1/BCL9/LEF1/HDAC9	32
GO:0003012	muscle system process	35/391	456/18493	4.95004721148388e-11	5.93015655935769e-08	5.28178721758684e-08	ACTA1/TNNC1/MYOCD/NOS1/TNNI1/MYBPC1/DRD2/CHRNA1/SLC8A3/DRD1/MYH14/CHRNG/MYH7/SORBS1/JSRP1/NMUR1/MYBPH/TTN/TRIM72/KCNIP2/CHRNB2/CSRP3/MYH11/CHRND/ATP1A2/ACTG2/ACTC1/MYOD1/P2RX1/SYNM/TMOD1/ACTN3/FLNA/ACTN2/SMPX	35
GO:0060537	muscle tissue development	32/391	395/18493	8.75832662266113e-11	7.86935647046102e-08	7.00896612092434e-08	ACTA1/BMP5/TNNC1/MYOCD/MEGF10/TNNI1/MYBPC1/DMRTA2/CHRNA1/ALDH1A2/MYH14/RBM24/MYH7/TTN/NRAP/CSRP3/ANKRD1/MYH11/KCNAB1/CHRND/FGFR2/ACTC1/MYOD1/ACTN3/NEBL/COL19A1/NOX4/ACTN2/EYA1/BCL9/LEF1/HDAC9	32
GO:0030049	muscle filament sliding	10/391	39/18493	5.85826688118482e-09	3.5091018618297e-06	3.12543676941807e-06	ACTA1/TNNC1/TNNI1/MYBPC1/MYH7/TTN/ACTC1/TMOD1/ACTN3/ACTN2	10
GO:0033275	actin-myosin filament sliding	10/391	39/18493	5.85826688118482e-09	3.5091018618297e-06	3.12543676941807e-06	ACTA1/TNNC1/TNNI1/MYBPC1/MYH7/TTN/ACTC1/TMOD1/ACTN3/ACTN2	10
GO:0030239	myofibril assembly	12/391	67/18493	1.41856333252561e-08	7.28330945299576e-06	6.48699412663214e-06	ACTA1/LDB3/MYBPC1/TTN/NRAP/CSRP3/ANKRD1/MYH11/ACTC1/TMOD1/NEBL/ACTN2	12
GO:0006941	striated muscle contraction	18/391	168/18493	1.84526424997418e-08	8.28984964300901e-06	7.38348497917301e-06	TNNC1/NOS1/TNNI1/CHRNA1/SLC8A3/MYH14/MYH7/JSRP1/MYBPH/TTN/CSRP3/CHRND/ATP1A2/ACTC1/SYNM/ACTN3/FLNA/SMPX	18
GO:0007517	muscle organ development	28/391	403/18493	3.93986083189129e-08	1.57331775886859e-05	1.40130020933116e-05	ACTA1/TNNC1/MYOCD/MEGF10/TNNI1/MYBPC1/DMRTA2/CHRNA1/MYH14/RBM24/MYH7/TTN/LAMA5/TRIM72/CSRP3/ANKRD1/KCNAB1/CHRND/FGFR2/ACTC1/MYOD1/ALX4/ACTN3/CXCL10/COL19A1/BCL9/LEF1/HDAC9	28
GO:0042692	muscle cell differentiation	26/391	373/18493	1.14348600460621e-07	3.84295312158098e-05	3.42278664520627e-05	ACTA1/MYOCD/NOS1/MEGF10/LDB3/MYBPC1/RBM24/TTN/NRAP/TRIM72/TRIM54/CSRP3/ANKRD1/MYH11/FGFR2/FOXF1/ACTC1/MYOD1/TMOD1/NEBL/CXCL10/NOX4/GDF15/ACTN2/BCL9/HDAC9	26
GO:0051146	striated muscle cell differentiation	22/391	277/18493	1.17619600270981e-07	3.84295312158098e-05	3.42278664520627e-05	ACTA1/MYOCD/NOS1/LDB3/MYBPC1/RBM24/TTN/NRAP/TRIM72/CSRP3/ANKRD1/MYH11/ACTC1/MYOD1/TMOD1/NEBL/CXCL10/NOX4/GDF15/ACTN2/BCL9/HDAC9	22
GO:0003009	skeletal muscle contraction	9/391	41/18493	1.48342714949088e-07	4.44286431272518e-05	3.95710698386119e-05	TNNC1/CHRNA1/SLC8A3/MYH14/MYH7/JSRP1/CHRND/SYNM/ACTN3	9
GO:0007519	skeletal muscle tissue development	16/391	161/18493	3.25117470961331e-07	8.9882476202694e-05	8.00552412302353e-05	ACTA1/MYOCD/MEGF10/DMRTA2/CHRNA1/MYH14/RBM24/CSRP3/ANKRD1/KCNAB1/CHRND/MYOD1/ACTN3/COL19A1/BCL9/HDAC9	16
GO:0031032	actomyosin structure organization	17/391	189/18493	5.81852206223093e-07	0.000149369773511843	0.000133038538280032	ACTA1/LDB3/MYBPC1/MYH14/SORBS1/TTN/NRAP/CSRP3/ANKRD1/MYH11/ACTC1/TMOD1/NEBL/PHACTR1/TAC1/NOX4/ACTN2	17
GO:0060538	skeletal muscle organ development	16/391	170/18493	6.81148676333377e-07	0.000163203222849477	0.000145359517524898	ACTA1/MYOCD/MEGF10/DMRTA2/CHRNA1/MYH14/RBM24/CSRP3/ANKRD1/KCNAB1/CHRND/MYOD1/ACTN3/COL19A1/BCL9/HDAC9	16
GO:0055001	muscle cell development	16/391	176/18493	1.08483004017771e-06	0.000243679947774918	0.000217037378432922	ACTA1/MEGF10/LDB3/MYBPC1/TTN/NRAP/TRIM54/CSRP3/ANKRD1/MYH11/ACTC1/MYOD1/TMOD1/NEBL/ACTN2/HDAC9	16
GO:0050879	multicellular organismal movement	9/391	53/18493	1.49987840243762e-06	0.000299475721020045	0.000266732761509521	TNNC1/CHRNA1/SLC8A3/MYH14/MYH7/JSRP1/CHRND/SYNM/ACTN3	9
GO:0050881	musculoskeletal movement	9/391	53/18493	1.49987840243762e-06	0.000299475721020045	0.000266732761509521	TNNC1/CHRNA1/SLC8A3/MYH14/MYH7/JSRP1/CHRND/SYNM/ACTN3	9
GO:0007271	synaptic transmission, cholinergic	7/391	29/18493	1.8697143418516e-06	0.000353671228663929	0.000315002842857103	CHRNA1/RIC3/CHRNG/CHRNB2/CHRND/CHRNA4/TAC1	7
GO:0010927	cellular component assembly involved in morphogenesis	12/391	105/18493	2.24238882156729e-06	0.000402957271235642	0.000358900231915059	ACTA1/LDB3/MYBPC1/TTN/NRAP/CSRP3/ANKRD1/MYH11/ACTC1/TMOD1/NEBL/ACTN2	12
GO:0015844	monoamine transport	11/391	88/18493	2.44211214543678e-06	0.000417950050033324	0.000372253786179111	NOS1/SYT4/DRD2/DRD1/MAPK15/CHRNB2/KCNB1/SYT9/CHRNA4/P2RX1/GPM6B	11
GO:0051580	regulation of neurotransmitter uptake	6/391	20/18493	2.59263847418948e-06	0.000423542848919864	0.000377235100478958	NOS1/DRD2/DRD1/GFAP/ATP1A2/GPM6B	6
GO:0050804	modulation of chemical synaptic transmission	25/391	418/18493	3.32823904688452e-06	0.000519880671689828	0.000463039897668268	SHISA9/RASGRF1/SYT4/DRD2/SLC8A3/DRD1/GFAP/CHRNB2/NPY5R/CDH1/KCNB1/SYT9/ATP1A2/CHRNA4/GRIA1/P2RX1/GRM4/HRH1/LRFN2/UNC13A/TAC1/SHANK2/SYN3/RIMS3/PLCB4	25
GO:0099177	regulation of trans-synaptic signaling	25/391	419/18493	3.47165723999885e-06	0.000519880671689828	0.000463039897668268	SHISA9/RASGRF1/SYT4/DRD2/SLC8A3/DRD1/GFAP/CHRNB2/NPY5R/CDH1/KCNB1/SYT9/ATP1A2/CHRNA4/GRIA1/P2RX1/GRM4/HRH1/LRFN2/UNC13A/TAC1/SHANK2/SYN3/RIMS3/PLCB4	25
GO:0001505	regulation of neurotransmitter levels	22/391	346/18493	4.9271962304828e-06	0.000708333730094207	0.000630888578395713	AGXT/NOS1/SYT4/DRD2/DRD1/SHMT2/GAD1/GFAP/CHRNB2/SYT9/PCLO/ATP1A2/MMP8/CHRNA4/P2RX1/GRM4/PAH/UNC13A/SYN3/RIMS3/GPM6B/IL10	22
GO:0070252	actin-mediated cell contraction	12/391	114/18493	5.35031914053936e-06	0.000739578730426863	0.000658717429408105	ACTA1/TNNC1/TNNI1/MYBPC1/MYH7/TTN/ATP1A2/ACTC1/TMOD1/ACTN3/FLNA/ACTN2	12
GO:0048738	cardiac muscle tissue development	17/391	224/18493	6.00723963106643e-06	0.000799630342001954	0.000712203341835206	BMP5/TNNC1/MYOCD/TNNI1/MYBPC1/ALDH1A2/MYH7/TTN/NRAP/CSRP3/ANKRD1/MYH11/FGFR2/ACTC1/NEBL/NOX4/ACTN2	17
GO:0030048	actin filament-based movement	13/391	136/18493	6.39015435845929e-06	0.000820221955867954	0.00073054358661935	ACTA1/TNNC1/TNNI1/MYBPC1/MYH14/MYH7/TTN/ATP1A2/ACTC1/TMOD1/ACTN3/FLNA/ACTN2	13
GO:0051588	regulation of neurotransmitter transport	13/391	141/18493	9.49432577878011e-06	0.00117664161548054	0.00104799436273214	NOS1/SYT4/DRD2/DRD1/GFAP/CHRNB2/SYT9/ATP1A2/CHRNA4/P2RX1/UNC13A/RIMS3/GPM6B	13
GO:0055002	striated muscle cell development	14/391	163/18493	9.84816083093337e-06	0.00117980966754582	0.00105081603813573	ACTA1/LDB3/MYBPC1/TTN/NRAP/CSRP3/ANKRD1/MYH11/ACTC1/MYOD1/TMOD1/NEBL/ACTN2/HDAC9	14
GO:0055003	cardiac myofibril assembly	6/391	26/18493	1.38309972647908e-05	0.00160350336031155	0.0014281854900587	MYBPC1/TTN/NRAP/CSRP3/ACTC1/NEBL	6
GO:0014866	skeletal myofibril assembly	5/391	16/18493	1.48443766050306e-05	0.0016672090474525	0.00148492596236507	ACTA1/MYBPC1/TTN/MYH11/ACTC1	5
GO:0006836	neurotransmitter transport	18/391	268/18493	1.72730725744967e-05	0.00184641439944747	0.00164453802791781	NOS1/SYT4/SLC6A20/DRD2/DRD1/GFAP/CHRNB2/SYT9/PCLO/ATP1A2/CHRNA4/P2RX1/GRM4/UNC13A/SV2C/SYN3/RIMS3/GPM6B	18
GO:0043501	skeletal muscle adaptation	6/391	27/18493	1.74674706681175e-05	0.00184641439944747	0.00164453802791781	ACTA1/TNNC1/TNNI1/MYH7/MYOD1/ACTN3	6
GO:0015696	ammonium transport	11/391	109/18493	1.97041832735084e-05	0.00202333813385684	0.00180211793487937	NOS1/SYT4/DRD2/DRD1/MAPK15/CHRNB2/SYT9/CHRNA4/P2RX1/RHCG/GPM6B	11
GO:0046683	response to organophosphorus	12/391	137/18493	3.48413939666457e-05	0.00347833249767013	0.00309803155124472	PCK1/RYR3/AGXT/GPD1/SLC8A3/PKLR/CNGA3/AKR1C1/PTPRN/P2RX1/NOX4/PDE3A	12
GO:0042391	regulation of membrane potential	23/391	424/18493	3.87155728412468e-05	0.00376064239976867	0.00334947530612323	DRD2/CHRNA1/SLC8A3/DRD1/MYH14/CHRNG/KCNIP2/CHRNB2/KCNB1/CHRND/ATP1A2/CHRNA4/GRIA1/P2RX1/GLRA2/TAC1/HTR3A/SHANK2/ABCD1/FLNA/ACTN2/RIMS3/HEBP2	23
GO:0034332	adherens junction organization	12/391	139/18493	4.02157180103407e-05	0.00380356027708327	0.00338770078862731	CDH12/SORBS1/LAMA5/CDH3/CAMSAP3/CDH1/PLEKHA7/CADM2/ACTN3/ACTN2/ARF6/GPM6B	12
GO:0035094	response to nicotine	7/391	47/18493	5.42983490507204e-05	0.00496653629223765	0.00442352366947681	DRD2/CHRNA1/CHRNG/CHRNB2/CHRND/ATP1A2/CHRNA4	7
GO:0015837	amine transport	10/391	101/18493	5.52758630187829e-05	0.00496653629223765	0.00442352366947681	SYT4/DRD2/DRD1/CHRNB2/NPY5R/KCNB1/SYT9/ATP1A2/CHRNA4/RHCG	10
GO:0014883	transition between fast and slow fiber	4/391	11/18493	5.77317706743828e-05	0.00506068253179833	0.00450737649860842	TNNC1/TNNI1/MYH7/ACTN3	4
GO:0051480	regulation of cytosolic calcium ion concentration	20/391	350/18493	6.05377194445004e-05	0.00518029913532225	0.00461391490803824	RYR3/NOS1/TRPA1/DRD2/RIC3/SLC8A3/DRD1/JSRP1/PTGER1/PDE6A/ACKR4/ATP1A2/TMEM178A/GRIA1/P2RX1/CCKBR/GPR20/CXCL10/CEMIP/TAC1	20
GO:0007218	neuropeptide signaling pathway	10/391	103/18493	6.53840883095644e-05	0.00534069121328579	0.00475677063515276	NPY/NXPH4/NMUR1/NPY5R/PROKR1/NPY1R/NPFFR2/GLRA2/TAC1/TAC3	10
GO:0060079	excitatory postsynaptic potential	10/391	103/18493	6.53840883095644e-05	0.00534069121328579	0.00475677063515276	DRD2/CHRNA1/CHRNG/CHRNB2/CHRND/CHRNA4/GRIA1/P2RX1/GLRA2/SHANK2	10
GO:0048167	regulation of synaptic plasticity	13/391	173/18493	8.22936305165187e-05	0.00657251795725263	0.00585391650060195	SHISA9/RASGRF1/SYT4/DRD2/SLC8A3/DRD1/GFAP/KCNB1/GRIA1/HRH1/UNC13A/SHANK2/RIMS3	13
GO:0014902	myotube differentiation	10/391	108/18493	9.77542347566024e-05	0.00763758086337455	0.0068025315307741	ACTA1/MYOCD/NOS1/RBM24/TRIM72/MYOD1/CXCL10/GDF15/BCL9/HDAC9	10
GO:0055008	cardiac muscle tissue morphogenesis	8/391	69/18493	0.000100818314277277	0.0077093834364369	0.00686648362188578	TNNC1/TNNI1/MYBPC1/MYH7/TTN/ANKRD1/FGFR2/ACTC1	8
GO:0015872	dopamine transport	7/391	52/18493	0.000105492256905653	0.00789873273581073	0.00703513055373003	SYT4/DRD2/DRD1/MAPK15/CHRNB2/SYT9/CHRNA4	7
GO:0031589	cell-substrate adhesion	19/391	338/18493	0.000114253988100559	0.00838018027006954	0.00746393937301394	PLG/SORBS1/OLFM4/LAMA5/CAMSAP3/CD63/SERPINE1/FAT2/ITGA3/SRCIN1/FOXF1/ACTN3/MUC4/STRC/FLNA/DDR1/ACTN2/GPM6B/CEACAM6	19
GO:0007015	actin filament organization	21/391	397/18493	0.000119109066040518	0.00852024505546325	0.00758869027726437	ACTA1/MYBPC1/USH1C/RND2/SORBS1/TTN/NRAP/RND3/CGNL1/ACTC1/ESPN/TMOD1/NEBL/PHACTR1/TAC1/SPTA1/CAP2/NOX4/FLNA/ACTN2/ARF6	21
GO:0099565	chemical synaptic transmission, postsynaptic	10/391	111/18493	0.000123028592662827	0.00852024505546325	0.00758869027726437	DRD2/CHRNA1/CHRNG/CHRNB2/CHRND/CHRNA4/GRIA1/P2RX1/GLRA2/SHANK2	10
GO:0001508	action potential	11/391	133/18493	0.000123390027123553	0.00852024505546325	0.00758869027726437	CHRNA1/DRD1/MYH14/KCNIP2/CHRNB2/KCNB1/ATP1A2/CHRNA4/P2RX1/TAC1/FLNA	11
GO:0098810	neurotransmitter reuptake	5/391	24/18493	0.000125646351680454	0.00852024505546325	0.00758869027726437	NOS1/DRD2/DRD1/ATP1A2/GPM6B	5
GO:0007613	memory	10/391	112/18493	0.000132593300883523	0.00882482080324784	0.00785996545783226	RASGRF1/SYT4/DRD2/SLC8A3/DRD1/CHRNB2/ITGA3/GRIA1/HRH1/TAC1	10
GO:0030240	skeletal muscle thin filament assembly	4/391	14/18493	0.00016651489887974	0.0105978124132736	0.00943910832345282	ACTA1/MYBPC1/TTN/ACTC1	4
GO:0030198	extracellular matrix organization	19/391	348/18493	0.000166571680062047	0.0105978124132736	0.00943910832345282	SCUBE3/COL4A6/PLG/LAMA5/GFAP/COL23A1/HAPLN1/CDH1/MYH11/SERPINE1/ITGA3/MMP8/FOXF1/GAS2/CTSV/COL19A1/DDR1/MMP7/GPM6B	19
GO:0051952	regulation of amine transport	9/391	94/18493	0.000168078827923371	0.0105978124132736	0.00943910832345282	SYT4/DRD2/DRD1/CHRNB2/NPY5R/KCNB1/SYT9/ATP1A2/CHRNA4	9
GO:0060078	regulation of postsynaptic membrane potential	11/391	139/18493	0.000182540653797055	0.011311226030114	0.0100745213828828	DRD2/CHRNA1/SLC8A3/CHRNG/CHRNB2/CHRND/CHRNA4/GRIA1/P2RX1/GLRA2/SHANK2	11
GO:0051937	catecholamine transport	8/391	76/18493	0.000199970153242965	0.0121812327246647	0.0108494065300956	SYT4/DRD2/DRD1/MAPK15/CHRNB2/KCNB1/SYT9/CHRNA4	8
GO:0007269	neurotransmitter secretion	12/391	167/18493	0.000233225850109118	0.013732465181722	0.0122310361179792	SYT4/DRD2/DRD1/CHRNB2/SYT9/PCLO/CHRNA4/P2RX1/GRM4/UNC13A/SYN3/RIMS3	12
GO:0099643	signal release from synapse	12/391	167/18493	0.000233225850109118	0.013732465181722	0.0122310361179792	SYT4/DRD2/DRD1/CHRNB2/SYT9/PCLO/CHRNA4/P2RX1/GRM4/UNC13A/SYN3/RIMS3	12
GO:0001504	neurotransmitter uptake	6/391	42/18493	0.000236898397681347	0.013732465181722	0.0122310361179792	NOS1/DRD2/DRD1/GFAP/ATP1A2/GPM6B	6
GO:0007611	learning or memory	15/391	247/18493	0.000260693992620126	0.0147743822342762	0.0131590359296002	RASGRF1/SYT4/DRD2/SLC8A3/DRD1/FOXB1/CHRNB2/KCNAB1/AFF2/ITGA3/ATP1A2/GRIA1/HRH1/TAC1/SHANK2	15
GO:0010830	regulation of myotube differentiation	7/391	60/18493	0.000263481207433876	0.0147743822342762	0.0131590359296002	MYOCD/RBM24/TRIM72/MYOD1/CXCL10/GDF15/HDAC9	7
GO:1901606	alpha-amino acid catabolic process	9/391	100/18493	0.00026901653688674	0.0147743822342762	0.0131590359296002	AGXT/NOS1/HPD/SHMT2/HOGA1/GAD1/GPT2/CARNS1/PAH	9
GO:0099504	synaptic vesicle cycle	13/391	195/18493	0.000271315867407409	0.0147743822342762	0.0131590359296002	SYT4/DRD2/DRD1/CHRNB2/SYT9/VAMP4/PCLO/CHRNA4/P2RX1/UNC13A/ARF6/SYN3/RIMS3	13
GO:2000300	regulation of synaptic vesicle exocytosis	8/391	80/18493	0.000285707683089857	0.0151331781213071	0.0134786031300398	SYT4/DRD2/DRD1/CHRNB2/SYT9/CHRNA4/P2RX1/RIMS3	8
GO:0016079	synaptic vesicle exocytosis	10/391	123/18493	0.000286326130286278	0.0151331781213071	0.0134786031300398	SYT4/DRD2/DRD1/CHRNB2/SYT9/PCLO/CHRNA4/P2RX1/UNC13A/RIMS3	10
GO:0014733	regulation of skeletal muscle adaptation	4/391	16/18493	0.000292770912891821	0.0152495458106261	0.0135822478429295	TNNC1/TNNI1/MYH7/ACTN3	4
GO:2001023	regulation of response to drug	9/391	102/18493	0.000312162379225467	0.0160273084419475	0.0142749743642804	SYT4/DRD2/DRD1/CHRNB2/SYT9/ATP1A2/CHRNA4/GPR37/IL10	9
GO:0060415	muscle tissue morphogenesis	8/391	82/18493	0.000338668180798089	0.0171432879125117	0.0152689390334617	TNNC1/TNNI1/MYBPC1/MYH7/TTN/ANKRD1/FGFR2/ACTC1	8
GO:0017158	regulation of calcium ion-dependent exocytosis	9/391	104/18493	0.000360875369502267	0.0180136955276548	0.0160441812669064	SYT4/DRD2/DRD1/CHRNB2/KCNB1/SYT9/CHRNA4/P2RX1/RIMS3	9
GO:0014074	response to purine-containing compound	11/391	151/18493	0.000374666214645928	0.0184348465734114	0.0164192860702762	PCK1/RYR3/AGXT/GPD1/SLC8A3/PKLR/CNGA3/PTPRN/P2RX1/NOX4/PDE3A	11
GO:0007274	neuromuscular synaptic transmission	5/391	30/18493	0.000379571131450318	0.0184348465734114	0.0164192860702762	CHRNA1/CHRNG/CHRNB2/CHRND/CHRNA4	5
GO:0050890	cognition	16/391	285/18493	0.000396065688721604	0.0189794678035393	0.0169043615354723	RASGRF1/SYT4/DRD2/SLC8A3/DRD1/FOXB1/CHRNB2/KCNAB1/AFF2/ITGA3/ATP1A2/CHRNA4/GRIA1/HRH1/TAC1/SHANK2	16
GO:0046928	regulation of neurotransmitter secretion	9/391	106/18493	0.000415694065798413	0.0193411688652902	0.017226516275473	SYT4/DRD2/DRD1/CHRNB2/SYT9/CHRNA4/P2RX1/UNC13A/RIMS3	9
GO:0017156	calcium ion regulated exocytosis	11/391	153/18493	0.000419192662147427	0.0193411688652902	0.017226516275473	SYT4/DRD2/DRD1/CHRNB2/KCNB1/SYT9/PCLO/CHRNA4/P2RX1/UNC13A/RIMS3	11
GO:0055007	cardiac muscle cell differentiation	10/391	129/18493	0.000419758255841023	0.0193411688652902	0.017226516275473	MYOCD/MYBPC1/TTN/NRAP/CSRP3/MYH11/ACTC1/NEBL/NOX4/ACTN2	10
GO:1902803	regulation of synaptic vesicle transport	8/391	85/18493	0.000432875102929199	0.0196930774674372	0.0175399492072977	SYT4/DRD2/DRD1/CHRNB2/SYT9/CHRNA4/P2RX1/RIMS3	8
GO:0019932	second-messenger-mediated signaling	21/391	439/18493	0.000462236462774723	0.0207659730901544	0.0184955405697097	NOS1/DRD2/DRD1/JSRP1/NMUR1/PTGER1/GNAL/ACKR4/RAMP1/MAFA/PCLO/ATP1A2/CXCL8/HRH1/ACTN3/SELE/CXCL10/PDE3B/MRAP/KSR1/PDE3A	21
GO:0008542	visual learning	6/391	48/18493	0.000498159530719499	0.0219425531647718	0.019543480120104	DRD2/DRD1/FOXB1/CHRNB2/ATP1A2/HRH1	6
GO:0097553	calcium ion transmembrane import into cytosol	10/391	132/18493	0.000503773208124481	0.0219425531647718	0.019543480120104	RYR3/NOS1/TRPA1/DRD2/SLC8A3/DRD1/JSRP1/ATP1A2/CXCL10/CEMIP	10
GO:0055013	cardiac muscle cell development	8/391	87/18493	0.00050674232406123	0.0219425531647718	0.019543480120104	MYBPC1/TTN/NRAP/CSRP3/MYH11/ACTC1/NEBL/ACTN2	8
GO:0048644	muscle organ morphogenesis	8/391	88/18493	0.000547327461641754	0.0234177963945293	0.0208574287074257	TNNC1/TNNI1/MYBPC1/MYH7/TTN/ANKRD1/FGFR2/ACTC1	8
GO:0072132	mesenchyme morphogenesis	6/391	49/18493	0.000557690530330795	0.0235804678353985	0.0210023145849653	ACTA1/BMP5/FOXF1/ACTG2/ACTC1/LEF1	6
GO:0050808	synapse organization	19/391	384/18493	0.000568402327999137	0.0236473196847549	0.0210618572361362	DRD2/CHRNA1/DRD1/PCDH8/FLRT1/CHRNB2/CDH1/PCLO/CNTN5/ITGA3/SRCIN1/GAP43/LRFN2/UNC13A/SHANK2/FRMPD4/ARF6/LRRTM3/IL10	19
GO:0050805	negative regulation of synaptic transmission	7/391	68/18493	0.000572430943954835	0.0236473196847549	0.0210618572361362	SYT4/DRD2/DRD1/NPY5R/KCNB1/GRIA1/SHANK2	7
GO:0006874	cellular calcium ion homeostasis	21/391	448/18493	0.000601342456703209	0.0245593726067197	0.0218741915171586	RYR3/NOS1/TRPA1/DRD2/RIC3/SLC8A3/DRD1/JSRP1/PTGER1/PDE6A/ACKR4/CSRP3/ATP1A2/TMEM178A/GRIA1/P2RX1/CCKBR/GPR20/CXCL10/CEMIP/TAC1	21
GO:0019933	cAMP-mediated signaling	12/391	186/18493	0.0006200390370822	0.0250384303289149	0.0223008718127377	NOS1/DRD2/DRD1/PTGER1/GNAL/RAMP1/PCLO/CXCL10/PDE3B/MRAP/KSR1/PDE3A	12
GO:0050954	sensory perception of mechanical stimulus	11/391	161/18493	0.000644215595120024	0.0257256760984596	0.0229129780673684	TRPA1/USH1C/MYH14/CHRNB2/TFAP2A/CLIC5/CNTN5/ESPN/CEMIP/STRC/EYA1	11
GO:0098693	regulation of synaptic vesicle cycle	9/391	114/18493	0.000707960267856735	0.0279605406887594	0.0249034953678697	SYT4/DRD2/DRD1/CHRNB2/SYT9/VAMP4/CHRNA4/P2RX1/RIMS3	9
GO:0035914	skeletal muscle cell differentiation	7/391	71/18493	0.000743933493335545	0.0290277468225169	0.0258540192974472	MYOCD/MEGF10/DMRTA2/RBM24/ANKRD1/MYOD1/BCL9	7
GO:0006937	regulation of muscle contraction	11/391	164/18493	0.000751135351834745	0.0290277468225169	0.0258540192974472	TNNC1/MYOCD/NOS1/TNNI1/SLC8A3/MYH7/MYBPH/ATP1A2/P2RX1/ACTN3/FLNA	11
GO:0048641	regulation of skeletal muscle tissue development	6/391	52/18493	0.000769881747426236	0.029029321519995	0.0258554218265251	MYOCD/MEGF10/RBM24/MYOD1/ACTN3/HDAC9	6
GO:0007416	synapse assembly	11/391	165/18493	0.000789892858658188	0.029029321519995	0.0258554218265251	DRD2/DRD1/FLRT1/CHRNB2/CDH1/PCLO/CNTN5/GAP43/SHANK2/ARF6/LRRTM3	11
GO:0097479	synaptic vesicle localization	11/391	165/18493	0.000789892858658188	0.029029321519995	0.0258554218265251	SYT4/DRD2/DRD1/CHRNB2/SYT9/PCLO/CHRNA4/P2RX1/UNC13A/SYN3/RIMS3	11
GO:0006942	regulation of striated muscle contraction	8/391	93/18493	0.00079156191122969	0.029029321519995	0.0258554218265251	NOS1/TNNI1/SLC8A3/MYH7/MYBPH/ATP1A2/ACTN3/FLNA	8
GO:0055006	cardiac cell development	8/391	93/18493	0.00079156191122969	0.029029321519995	0.0258554218265251	MYBPC1/TTN/NRAP/CSRP3/MYH11/ACTC1/NEBL/ACTN2	8
GO:0051209	release of sequestered calcium ion into cytosol	9/391	116/18493	0.00080255409880561	0.0291351457687612	0.0259496758582441	RYR3/NOS1/TRPA1/DRD2/DRD1/JSRP1/ATP1A2/CXCL10/CEMIP	9
GO:0007632	visual behavior	6/391	53/18493	0.000852926696810572	0.0303134215594258	0.0269991257248086	DRD2/DRD1/FOXB1/CHRNB2/ATP1A2/HRH1	6
GO:0043954	cellular component maintenance	6/391	53/18493	0.000852926696810572	0.0303134215594258	0.0269991257248086	MYOCD/CAMSAP3/PLEKHA7/PCLO/ITGA3/ARF6	6
GO:0055074	calcium ion homeostasis	21/391	461/18493	0.00086586222281954	0.0303134215594258	0.0269991257248086	RYR3/NOS1/TRPA1/DRD2/RIC3/SLC8A3/DRD1/JSRP1/PTGER1/PDE6A/ACKR4/CSRP3/ATP1A2/TMEM178A/GRIA1/P2RX1/CCKBR/GPR20/CXCL10/CEMIP/TAC1	21
GO:0060713	labyrinthine layer morphogenesis	4/391	21/18493	0.00088553313325622	0.0303134215594258	0.0269991257248086	BMP5/FGFR2/LEF1/IL10	4
GO:0007605	sensory perception of sound	10/391	142/18493	0.000890547803020496	0.0303134215594258	0.0269991257248086	USH1C/MYH14/CHRNB2/TFAP2A/CLIC5/CNTN5/ESPN/CEMIP/STRC/EYA1	10
GO:0007626	locomotory behavior	12/391	194/18493	0.000897962039394721	0.0303134215594258	0.0269991257248086	DRD2/DRD1/GAD1/CHRNB2/SLC4A10/NPY1R/ATP1A2/CHRNA4/ESPN/TMOD1/GPR37/GNG7	12
GO:0009063	cellular amino acid catabolic process	9/391	118/18493	0.00090719012165511	0.0303134215594258	0.0269991257248086	AGXT/NOS1/HPD/SHMT2/HOGA1/GAD1/GPT2/CARNS1/PAH	9
GO:0051283	negative regulation of sequestering of calcium ion	9/391	118/18493	0.00090719012165511	0.0303134215594258	0.0269991257248086	RYR3/NOS1/TRPA1/DRD2/DRD1/JSRP1/ATP1A2/CXCL10/CEMIP	9
GO:0043473	pigmentation	8/391	95/18493	0.000910920848196436	0.0303134215594258	0.0269991257248086	TYRP1/DRD2/PMEL/KITLG/CDH3/CD63/EDAR/LEF1	8
GO:0007160	cell-matrix adhesion	13/391	222/18493	0.00092519455329072	0.0305059561883197	0.0271706097204933	SORBS1/LAMA5/CAMSAP3/CD63/SERPINE1/ITGA3/ACTN3/MUC4/STRC/DDR1/ACTN2/GPM6B/CEACAM6	13
GO:0007204	positive regulation of cytosolic calcium ion concentration	16/391	309/18493	0.000945689505224583	0.0308982552888832	0.0275200170850522	RYR3/NOS1/TRPA1/DRD2/RIC3/SLC8A3/DRD1/JSRP1/PTGER1/ACKR4/ATP1A2/CCKBR/GPR20/CXCL10/CEMIP/TAC1	16
GO:0043062	extracellular structure organization	19/391	402/18493	0.000981390991747175	0.031775848867922	0.0283016596102718	SCUBE3/COL4A6/PLG/LAMA5/GFAP/COL23A1/HAPLN1/CDH1/MYH11/SERPINE1/ITGA3/MMP8/FOXF1/GAS2/CTSV/COL19A1/DDR1/MMP7/GPM6B	19
GO:0003015	heart process	14/391	252/18493	0.000994813572656919	0.0319228569654372	0.0284325946846776	TNNC1/RYR3/NOS1/DRD2/SLC8A3/MYH7/TTN/KCNIP2/CSRP3/ATP1A2/ACTC1/TAC1/NOX4/FLNA	14
GO:0051481	negative regulation of cytosolic calcium ion concentration	3/391	10/18493	0.00100773187642294	0.0320161769645619	0.0285157116097686	RYR3/DRD2/ATP1A2	3
GO:0051282	regulation of sequestering of calcium ion	9/391	120/18493	0.00102264388328883	0.0320161769645619	0.0285157116097686	RYR3/NOS1/TRPA1/DRD2/DRD1/JSRP1/ATP1A2/CXCL10/CEMIP	9
GO:0003013	circulatory system process	22/391	500/18493	0.00103249980962885	0.0320161769645619	0.0285157116097686	TNNC1/RYR3/NOS1/DRD2/NPY/SLC8A3/DRD1/MYH7/TTN/KCNIP2/CSRP3/NPY1R/ATP1A2/ACTC1/P2RX1/HRH1/CXCL10/TAC1/BRS3/NOX4/FLNA/PDE3A	22
GO:0003007	heart morphogenesis	14/391	253/18493	0.00103335462656906	0.0320161769645619	0.0285157116097686	BMP5/TNNC1/TNNI1/MYBPC1/ALDH1A2/MYH7/TTN/NPY5R/ANKRD1/NPY1R/FGFR2/FOXF1/ACTC1/EYA1	14
GO:0015850	organic hydroxy compound transport	14/391	255/18493	0.00111421200828635	0.0340086630755031	0.0302903507051533	NOS1/SYT4/DRD2/DRD1/MAPK15/CHRNB2/KCNB1/AKR1C1/SYT9/CHRNA4/P2RX1/SLCO1C1/TAC1/GPM6B	14
GO:0051591	response to cAMP	8/391	98/18493	0.00111658938311335	0.0340086630755031	0.0302903507051533	PCK1/AGXT/GPD1/SLC8A3/PKLR/CNGA3/PTPRN/NOX4	8
GO:0007187	G protein-coupled receptor signaling pathway, coupled to cyclic nucleotide second messenger	14/391	256/18493	0.00115659206556417	0.0349310242322489	0.0311118661776261	NOS1/DRD2/NPY/DRD1/PTGER1/GNAL/RAMP1/NPY1R/GRM4/HRH1/CXCL10/GPR37/FLNA/MRAP	14
GO:0018958	phenol-containing compound metabolic process	8/391	99/18493	0.00119282828440841	0.0356926326071802	0.031790204656426	TYRP1/DRD2/DRD1/PMEL/CDH3/CHRNB2/PAH/GPR37	8
GO:0008306	associative learning	7/391	77/18493	0.00120754415278684	0.0356926326071802	0.031790204656426	DRD2/DRD1/FOXB1/CHRNB2/ATP1A2/HRH1/TAC1	7
GO:0051208	sequestering of calcium ion	9/391	123/18493	0.00121788806427085	0.0356926326071802	0.031790204656426	RYR3/NOS1/TRPA1/DRD2/DRD1/JSRP1/ATP1A2/CXCL10/CEMIP	9
GO:1903305	regulation of regulated secretory pathway	10/391	148/18493	0.00122153417103038	0.0356926326071802	0.031790204656426	SYT4/DRD2/DRD1/CHRNB2/KCNB1/SYT9/FOXF1/CHRNA4/P2RX1/RIMS3	10
GO:0016338	calcium-independent cell-cell adhesion via plasma membrane cell-adhesion molecules	4/391	23/18493	0.00126718330198924	0.0367278773173334	0.0327122616413352	CLDN16/CLDN1/CLDN4/CLDN10	4
GO:0060402	calcium ion transport into cytosol	10/391	149/18493	0.00128537248433781	0.0369570296696806	0.0329163597883897	RYR3/NOS1/TRPA1/DRD2/SLC8A3/DRD1/JSRP1/ATP1A2/CXCL10/CEMIP	10
GO:0007631	feeding behavior	8/391	101/18493	0.00135773899147421	0.0382745255452374	0.0340898082134162	DRD2/NPY/DRD1/CHRNB2/NPY5R/NPY1R/BRS3/GDF15	8
GO:0030241	skeletal muscle myosin thick filament assembly	3/391	11/18493	0.00136398191607865	0.0382745255452374	0.0340898082134162	MYBPC1/TTN/MYH11	3
GO:0071688	striated muscle myosin thick filament assembly	3/391	11/18493	0.00136398191607865	0.0382745255452374	0.0340898082134162	MYBPC1/TTN/MYH11	3
GO:0014888	striated muscle adaptation	6/391	58/18493	0.00137649309908832	0.0382745255452374	0.0340898082134162	ACTA1/TNNC1/TNNI1/MYH7/MYOD1/ACTN3	6
GO:0009612	response to mechanical stimulus	12/391	204/18493	0.00138444304977208	0.0382745255452374	0.0340898082134162	ACTA1/TRPA1/DRD2/TTN/CSRP3/ANKRD1/ATP1A2/PKD1L2/CXCL10/STRC/STRBP/MMP7	12
GO:0099003	vesicle-mediated transport in synapse	12/391	205/18493	0.00144321917515654	0.0395948833245238	0.0352658056380156	SYT4/DRD2/DRD1/CHRNB2/SYT9/VAMP4/PCLO/CHRNA4/P2RX1/UNC13A/ARF6/RIMS3	12
GO:0014046	dopamine secretion	5/391	40/18493	0.0014742506258067	0.0398380206702953	0.0354823597394394	SYT4/DRD2/CHRNB2/SYT9/CHRNA4	5
GO:0014059	regulation of dopamine secretion	5/391	40/18493	0.0014742506258067	0.0398380206702953	0.0354823597394394	SYT4/DRD2/CHRNB2/SYT9/CHRNA4	5
GO:0035640	exploration behavior	4/391	24/18493	0.001495490692051	0.0401103996062037	0.0357249583230722	GAD1/SLC4A10/ITGA3/CHRNA4	4
GO:0072503	cellular divalent inorganic cation homeostasis	21/391	483/18493	0.00154339405868061	0.0410885796066527	0.036596189726688	RYR3/NOS1/TRPA1/DRD2/RIC3/SLC8A3/DRD1/JSRP1/PTGER1/PDE6A/ACKR4/CSRP3/ATP1A2/TMEM178A/GRIA1/P2RX1/CCKBR/GPR20/CXCL10/CEMIP/TAC1	21
GO:0016054	organic acid catabolic process	14/391	265/18493	0.00160260258360742	0.0420419977042705	0.0374453665520565	PCK1/AGXT/NOS1/HPD/ALDH1L1/SHMT2/HOGA1/GAD1/CRABP1/GPT2/CARNS1/PAH/CEMIP/ABCD1	14
GO:0046395	carboxylic acid catabolic process	14/391	265/18493	0.00160260258360742	0.0420419977042705	0.0374453665520565	PCK1/AGXT/NOS1/HPD/ALDH1L1/SHMT2/HOGA1/GAD1/CRABP1/GPT2/CARNS1/PAH/CEMIP/ABCD1	14
GO:0048489	synaptic vesicle transport	10/391	154/18493	0.00164665350337739	0.0423655428968431	0.0377335371670034	SYT4/DRD2/DRD1/CHRNB2/SYT9/PCLO/CHRNA4/P2RX1/UNC13A/RIMS3	10
GO:0097480	establishment of synaptic vesicle localization	10/391	154/18493	0.00164665350337739	0.0423655428968431	0.0377335371670034	SYT4/DRD2/DRD1/CHRNB2/SYT9/PCLO/CHRNA4/P2RX1/UNC13A/RIMS3	10
GO:0050982	detection of mechanical stimulus	5/391	41/18493	0.00165029938941515	0.0423655428968431	0.0377335371670034	TRPA1/TTN/CSRP3/PKD1L2/STRC	5
GO:0006939	smooth muscle contraction	8/391	105/18493	0.00174174133489145	0.0440832278704215	0.0392634203069303	MYOCD/DRD2/DRD1/NMUR1/CHRNB2/MYH11/ATP1A2/P2RX1	8
GO:0043266	regulation of potassium ion transport	8/391	105/18493	0.00174174133489145	0.0440832278704215	0.0392634203069303	NOS1/DRD2/DRD1/KCNIP2/CD63/KCNAB1/FLNA/ACTN2	8
GO:0031034	myosin filament assembly	3/391	12/18493	0.0017902577543888	0.0443895591126876	0.039536259046271	MYBPC1/TTN/MYH11	3
GO:0048747	muscle fiber development	6/391	61/18493	0.00179089762697265	0.0443895591126876	0.039536259046271	ACTA1/MYBPC1/TTN/MYH11/MYOD1/HDAC9	6
GO:0050433	regulation of catecholamine secretion	6/391	61/18493	0.00179089762697265	0.0443895591126876	0.039536259046271	SYT4/DRD2/CHRNB2/KCNB1/SYT9/CHRNA4	6
GO:0044331	cell-cell adhesion mediated by cadherin	5/391	42/18493	0.00184129952343323	0.0450178944708777	0.0400958958164014	PLG/CDH12/CDH3/CDH1/PLEKHA7	5
GO:0046189	phenol-containing compound biosynthetic process	5/391	42/18493	0.00184129952343323	0.0450178944708777	0.0400958958164014	TYRP1/PMEL/CDH3/PAH/GPR37	5
GO:0098742	cell-cell adhesion via plasma-membrane adhesion molecules	14/391	270/18493	0.0019069061322659	0.0463068962119165	0.0412439654923229	CDH12/PCDH8/CDH3/CLDN16/CDH1/TENM2/CLDN1/CLDN4/FAT2/PCDHA9/SELE/CEACAM6/CLDN10/IL10	14
GO:0008015	blood circulation	21/391	492/18493	0.00192942915686413	0.0465393851662395	0.0414510354364099	TNNC1/RYR3/NOS1/DRD2/NPY/SLC8A3/DRD1/MYH7/TTN/KCNIP2/CSRP3/NPY1R/ATP1A2/ACTC1/P2RX1/HRH1/CXCL10/TAC1/BRS3/FLNA/PDE3A	21
GO:0060669	embryonic placenta morphogenesis	4/391	26/18493	0.00203515313066131	0.048762269010645	0.0434308818971302	BMP5/FGFR2/LEF1/IL10	4
GO:0019935	cyclic-nucleotide-mediated signaling	12/391	214/18493	0.0020708876283506	0.0492322074915592	0.0438494399970219	NOS1/DRD2/DRD1/PTGER1/GNAL/RAMP1/PCLO/CXCL10/PDE3B/MRAP/KSR1/PDE3A	12
GO:0050806	positive regulation of synaptic transmission	10/391	159/18493	0.0020861697409738	0.0492322074915592	0.0438494399970219	DRD2/SLC8A3/DRD1/GFAP/CHRNB2/SYT9/UNC13A/TAC1/SHANK2/RIMS3	10
GO:0009582	detection of abiotic stimulus	9/391	133/18493	0.00209586192159392	0.0492322074915592	0.0438494399970219	TRPA1/GRK1/TTN/PDE6A/CSRP3/NPFFR2/PKD1L2/TAC1/STRC	9
GO:0050432	catecholamine secretion	6/391	63/18493	0.00211553544698314	0.0493716519250481	0.0439736383750904	SYT4/DRD2/CHRNB2/KCNB1/SYT9/CHRNA4	6
GO:0008652	cellular amino acid biosynthetic process	7/391	85/18493	0.00214685587996462	0.0494090847031933	0.0440069784677418	AGXT/SHMT2/NAT8L/GAD1/GPT2/PAH/ASPG	7
GO:0045445	myoblast differentiation	7/391	85/18493	0.00214685587996462	0.0494090847031933	0.0440069784677418	MYOCD/RBM24/ANKRD1/KCNAB1/MYOD1/CXCL10/HIF1AN	7
GO:0060047	heart contraction	13/391	244/18493	0.00215838238686738	0.0494090847031933	0.0440069784677418	TNNC1/RYR3/NOS1/DRD2/SLC8A3/MYH7/TTN/KCNIP2/CSRP3/ATP1A2/ACTC1/TAC1/FLNA	13
GO:0060401	cytosolic calcium ion transport	10/391	161/18493	0.00228648353172661	0.0511430531727537	0.0455513647594951	RYR3/NOS1/TRPA1/DRD2/SLC8A3/DRD1/JSRP1/ATP1A2/CXCL10/CEMIP	10
GO:0014819	regulation of skeletal muscle contraction	3/391	13/18493	0.00229104940478947	0.0511430531727537	0.0455513647594951	SLC8A3/MYH7/ACTN3	3
GO:0031033	myosin filament organization	3/391	13/18493	0.00229104940478947	0.0511430531727537	0.0455513647594951	MYBPC1/TTN/MYH11	3
GO:2000009	negative regulation of protein localization to cell surface	3/391	13/18493	0.00229104940478947	0.0511430531727537	0.0455513647594951	ACTN2/ARF6/GPM6B	3
GO:0035051	cardiocyte differentiation	10/391	163/18493	0.0025019755150013	0.0555067901291029	0.0494379957187716	MYOCD/MYBPC1/TTN/NRAP/CSRP3/MYH11/ACTC1/NEBL/NOX4/ACTN2	10
GO:0030900	forebrain development	17/391	374/18493	0.00267680459167375	0.0588203123988191	0.0523892364481179	DRD2/DMRTA2/NPY/SLC8A3/ALDH1A2/IGF2BP1/DRD1/CHD5/FOXB1/CHRNB2/CDH1/SLC4A10/FGFR2/SOX2/FLNA/EFNA2/LEF1	17
GO:0002026	regulation of the force of heart contraction	4/391	28/18493	0.00269614475221453	0.0588203123988191	0.0523892364481179	NOS1/MYH7/CSRP3/ATP1A2	4
GO:0007188	adenylate cyclase-modulating G protein-coupled receptor signaling pathway	12/391	221/18493	0.0027004317044533	0.0588203123988191	0.0523892364481179	NOS1/DRD2/DRD1/PTGER1/GNAL/RAMP1/NPY1R/GRM4/CXCL10/GPR37/FLNA/MRAP	12
GO:0045214	sarcomere organization	5/391	46/18493	0.00276962814854891	0.0599641178667758	0.0534079847795639	LDB3/MYBPC1/TTN/ANKRD1/ACTN2	5
GO:0014854	response to inactivity	3/391	14/18493	0.00287046790640121	0.0614075098547972	0.0546935645574315	DRD2/ACTN3/IL10	3
GO:0048172	regulation of short-term neuronal synaptic plasticity	3/391	14/18493	0.00287046790640121	0.0614075098547972	0.0546935645574315	SHISA9/SYT4/UNC13A	3
GO:0051966	regulation of synaptic transmission, glutamatergic	6/391	67/18493	0.00289581669310162	0.0614445136653721	0.0547265225833689	DRD2/DRD1/ATP1A2/GRM4/UNC13A/SHANK2	6
GO:1901605	alpha-amino acid metabolic process	12/391	223/18493	0.00290639046274715	0.0614445136653721	0.0547265225833689	AGXT/NOS1/HPD/SHMT2/HOGA1/GAD1/GPT2/CARNS1/CKMT1B/PAH/CKM/NOX4	12
GO:1904062	regulation of cation transmembrane transport	15/391	314/18493	0.00293958811007996	0.0617265853814793	0.0549777541941477	NOS1/SHISA9/RASGRF1/DRD2/DRD1/JSRP1/KCNIP2/CD63/KCNAB1/ATP1A2/CXCL10/CEMIP/SHANK2/FLNA/ACTN2	15
GO:0007215	glutamate receptor signaling pathway	7/391	90/18493	0.00297125744880243	0.0617265853814793	0.0549777541941477	SHISA9/RASGRF1/KCNB1/GRIA1/GRM4/UNC13A/SHANK2	7
GO:0035249	synaptic transmission, glutamatergic	7/391	90/18493	0.00297125744880243	0.0617265853814793	0.0549777541941477	DRD2/DRD1/ATP1A2/P2RX1/GRM4/UNC13A/SHANK2	7
GO:0021884	forebrain neuron development	4/391	29/18493	0.00307603284893163	0.0631729260517731	0.0562659602622623	DRD2/DRD1/SLC4A10/FGFR2	4
GO:0060292	long-term synaptic depression	4/391	29/18493	0.00307603284893163	0.0631729260517731	0.0562659602622623	DRD1/KCNB1/GRIA1/SHANK2	4
GO:0007612	learning	9/391	141/18493	0.00311137645742428	0.0631767626439709	0.0562693773834506	DRD2/SLC8A3/DRD1/FOXB1/CHRNB2/ATP1A2/HRH1/TAC1/SHANK2	9
GO:0030534	adult behavior	9/391	141/18493	0.00311137645742428	0.0631767626439709	0.0562693773834506	DRD2/NPY/DRD1/CHRNB2/ATP1A2/CHRNA4/TMOD1/BRS3/SHANK2	9
GO:0034330	cell junction organization	14/391	287/18493	0.00332130442544874	0.0670604949722628	0.0597284846705478	CDH12/SORBS1/LAMA5/CDH3/CAMSAP3/CDH1/CLDN1/PLEKHA7/CADM2/ACTN3/FLNA/ACTN2/ARF6/GPM6B	14
GO:0010862	positive regulation of pathway-restricted SMAD protein phosphorylation	5/391	48/18493	0.00334284680489141	0.0671183878032387	0.0597800478310778	BMP5/BMP3/GDF11/INHBE/GDF15	5
GO:0006837	serotonin transport	3/391	15/18493	0.00353226256329649	0.070137854433633	0.0624693832799338	NOS1/P2RX1/GPM6B	3
GO:0090494	dopamine uptake	3/391	15/18493	0.00353226256329649	0.070137854433633	0.0624693832799338	DRD2/DRD1/MAPK15	3
GO:0034765	regulation of ion transmembrane transport	19/391	454/18493	0.00385219082289229	0.0760701858103015	0.0677531075327672	NOS1/SHISA9/RASGRF1/KCNQ2/DRD2/DRD1/JSRP1/KCNIP2/KCNB1/CD63/KCNAB1/CLIC5/ATP1A2/CXCL10/CEMIP/HTR3A/SHANK2/FLNA/ACTN2	19
GO:0001756	somitogenesis	6/391	72/18493	0.00415215088888332	0.0811023385578623	0.0722350735302871	ALDH1A2/PCDH8/FOXB1/FOXF1/NKD1/LEF1	6
GO:0003208	cardiac ventricle morphogenesis	6/391	72/18493	0.00415215088888332	0.0811023385578623	0.0722350735302871	TNNC1/TNNI1/MYH7/NPY5R/FGFR2/FOXF1	6
GO:0017157	regulation of exocytosis	11/391	204/18493	0.00421327609492057	0.0818177456861707	0.0728722621420628	SYT4/DRD2/DRD1/CHRNB2/KCNB1/SYT9/PCLO/FOXF1/CHRNA4/P2RX1/RIMS3	11
GO:0030952	establishment or maintenance of cytoskeleton polarity	3/391	16/18493	0.00427983755954371	0.0818177456861707	0.0728722621420628	RND2/CAMSAP3/RND3	3
GO:0032225	regulation of synaptic transmission, dopaminergic	3/391	16/18493	0.00427983755954371	0.0818177456861707	0.0728722621420628	DRD2/DRD1/CHRNB2	3
GO:0090493	catecholamine uptake	3/391	16/18493	0.00427983755954371	0.0818177456861707	0.0728722621420628	DRD2/DRD1/MAPK15	3
GO:0048168	regulation of neuronal synaptic plasticity	5/391	51/18493	0.00435583729968999	0.0828300489687081	0.0737738859836105	SHISA9/RASGRF1/SYT4/DRD2/UNC13A	5
GO:0007616	long-term memory	4/391	32/18493	0.00443129475546806	0.0833825829903257	0.0742660091010106	RASGRF1/DRD2/GRIA1/TAC1	4
GO:0032228	regulation of synaptic transmission, GABAergic	4/391	32/18493	0.00443129475546806	0.0833825829903257	0.0742660091010106	DRD2/NPY5R/TAC1/SYN3	4
GO:0007200	phospholipase C-activating G protein-coupled receptor signaling pathway	7/391	97/18493	0.00450784490044862	0.0843812217302725	0.0751554624027645	DRD2/DRD1/NMUR1/HRH1/CCKBR/GPR20/ACTN2	7
GO:0021954	central nervous system neuron development	6/391	74/18493	0.00475332505657773	0.0880590219244349	0.0784311529954036	DRD2/NPY/DRD1/CHRNB2/SLC4A10/FGFR2	6
GO:0022617	extracellular matrix disassembly	6/391	74/18493	0.00475332505657773	0.0880590219244349	0.0784311529954036	SCUBE3/PLG/MMP8/CTSV/DDR1/MMP7	6
GO:0051017	actin filament bundle assembly	9/391	151/18493	0.00488647805822559	0.0896858653182079	0.0798801266533902	USH1C/RND2/SORBS1/RND3/ESPN/PHACTR1/TAC1/NOX4/FLNA	9
GO:0006813	potassium ion transport	12/391	238/18493	0.00489104885986888	0.0896858653182079	0.0798801266533902	NOS1/KCNQ2/DRD2/DRD1/KCNIP2/KCNB1/CD63/KCNAB1/ATP1A2/SLC9A2/FLNA/ACTN2	12
GO:0044282	small molecule catabolic process	18/391	431/18493	0.00494655157255139	0.0902431794505061	0.0803765072515564	PCK1/AGXT/NOS1/HPD/ALDH1L1/SHMT2/HOGA1/PKLR/GAD1/PGM5/CRABP1/FUT9/GPT2/CARNS1/PAH/ACTN3/CEMIP/ABCD1	18
GO:0010832	negative regulation of myotube differentiation	3/391	17/18493	0.00511626796999167	0.091941072106425	0.0818887620524378	MYOCD/TRIM72/CXCL10	3
GO:0048739	cardiac muscle fiber development	3/391	17/18493	0.00511626796999167	0.091941072106425	0.0818887620524378	MYBPC1/TTN/MYH11	3
GO:0045661	regulation of myoblast differentiation	5/391	53/18493	0.00514194643666984	0.091941072106425	0.0818887620524378	MYOCD/RBM24/MYOD1/CXCL10/HIF1AN	5
GO:0060563	neuroepithelial cell differentiation	5/391	53/18493	0.00514194643666984	0.091941072106425	0.0818887620524378	ESRP1/USH1C/SERPINE1/STRC/LEF1	5
GO:0048732	gland development	18/391	434/18493	0.00530684349473652	0.0944197798023913	0.0840964620505146	PCK1/DRD2/ALDH1A2/LAMA5/FOXB1/CDH1/CLDN1/FGFR2/FOXF1/CCKBR/EDAR/TDGF1/SOX2/DDR1/ARF6/LEF1/HOXB9/IL10	18
GO:0021536	diencephalon development	6/391	76/18493	0.00541617185153997	0.0948822844908933	0.084508399126265	DRD2/ALDH1A2/FOXB1/CHRNB2/CDH1/SOX2	6
GO:0051147	regulation of muscle cell differentiation	10/391	182/18493	0.00546961986539558	0.0948822844908933	0.084508399126265	MYOCD/MEGF10/RBM24/TRIM72/FGFR2/FOXF1/MYOD1/CXCL10/GDF15/HDAC9	10
GO:0019228	neuronal action potential	4/391	34/18493	0.00552882506777675	0.0948822844908933	0.084508399126265	CHRNA1/DRD1/MYH14/P2RX1	4
GO:0048333	mesodermal cell differentiation	4/391	34/18493	0.00552882506777675	0.0948822844908933	0.084508399126265	ITGA3/FGFR2/FOXF1/EYA1	4
GO:0048566	embryonic digestive tract development	4/391	34/18493	0.00552882506777675	0.0948822844908933	0.084508399126265	ALDH1A2/FGFR2/FOXF1/CXCL8	4
GO:0006584	catecholamine metabolic process	5/391	54/18493	0.00557044018574805	0.0948822844908933	0.084508399126265	DRD2/DRD1/CHRNB2/PAH/GPR37	5
GO:0009712	catechol-containing compound metabolic process	5/391	54/18493	0.00557044018574805	0.0948822844908933	0.084508399126265	DRD2/DRD1/CHRNB2/PAH/GPR37	5
GO:0034394	protein localization to cell surface	5/391	54/18493	0.00557044018574805	0.0948822844908933	0.084508399126265	RIC3/FLNA/ACTN2/ARF6/GPM6B	5
GO:0043949	regulation of cAMP-mediated signaling	5/391	54/18493	0.00557044018574805	0.0948822844908933	0.084508399126265	NOS1/CXCL10/PDE3B/MRAP/PDE3A	5
GO:0045471	response to ethanol	8/391	127/18493	0.00561999932733466	0.0952748942567962	0.084858083189795	DRD2/CHRNB2/CLDN1/FGFR2/ACTC1/GLRA2/HTR3A/CA3	8
GO:0061572	actin filament bundle organization	9/391	155/18493	0.00578433036469742	0.097452958190369	0.0867980100919405	USH1C/RND2/SORBS1/RND3/ESPN/PHACTR1/TAC1/NOX4/FLNA	9
GO:0051648	vesicle localization	14/391	306/18493	0.00581589201536938	0.097452958190369	0.0867980100919405	SYT4/DRD2/DRD1/MAPK15/CDH3/CHRNB2/SYT9/PCLO/CHRNA4/GRIA1/P2RX1/UNC13A/SYN3/RIMS3	14
GO:0002576	platelet degranulation	8/391	128/18493	0.00588737706866511	0.097452958190369	0.0867980100919405	PPBP/PLG/TTN/CD63/SERPINE1/P2RX1/FLNA/ACTN2	8
GO:0060359	response to ammonium ion	8/391	128/18493	0.00588737706866511	0.097452958190369	0.0867980100919405	DRD2/DRD1/CHRNB2/CHRNA4/HRH1/TAC1/HTR3A/CASP7	8
GO:0035282	segmentation	7/391	102/18493	0.00592724833595702	0.097452958190369	0.0867980100919405	ALDH1A2/PCDH8/FOXB1/FOXF1/TDGF1/NKD1/LEF1	7
GO:0042136	neurotransmitter biosynthetic process	7/391	102/18493	0.00592724833595702	0.097452958190369	0.0867980100919405	AGXT/NOS1/SHMT2/GAD1/MMP8/PAH/IL10	7
GO:0072659	protein localization to plasma membrane	12/391	244/18493	0.00593828543230129	0.097452958190369	0.0867980100919405	SORBS1/LAMA5/RAMP1/CDH1/KCNB1/FAM126A/ITGA3/ANK1/FLNA/MRAP/ACTN2/ARF6	12
GO:0050807	regulation of synapse organization	11/391	214/18493	0.00600349030385117	0.097852562067963	0.0871539235710616	DRD2/PCDH8/FLRT1/CHRNB2/SRCIN1/GAP43/LRFN2/FRMPD4/ARF6/LRRTM3/IL10	11
GO:0060749	mammary gland alveolus development	3/391	18/18493	0.006044315186168	0.097852562067963	0.0871539235710616	FOXB1/FOXF1/DDR1	3
GO:0061377	mammary gland lobule development	3/391	18/18493	0.006044315186168	0.097852562067963	0.0871539235710616	FOXB1/FOXF1/DDR1	3
GO:0051954	positive regulation of amine transport	4/391	35/18493	0.00613990668879151	0.0985820735651907	0.0878036744608689	SYT4/DRD2/CHRNB2/KCNB1	4
GO:0042866	pyruvate biosynthetic process	6/391	78/18493	0.0061442360819707	0.0985820735651907	0.0878036744608689	AGXT/OGDHL/GPD1/HOGA1/PKLR/ACTN3	6
