# Supplementary material for: Identification of Subtype-Specific Metastasis-Related Genetic Signatures in Sarcoma
Source: Front Oncol. 2020 Oct 6;10:544956. doi: 10.3389/fonc.2020.544956 (PMC7573283; doi:10.3389/fonc.2020.544956)
Supplement: Supplementary file 6 [file Table_6.XLS]

ID	Description	GeneRatio	BgRatio	pvalue	p.adjust	qvalue	geneID	Count
GO:0007517	muscle organ development	30/472	403/18493	1.78418260127099e-07	0.000429629478771502	0.000384389395373967	LMOD3/P2RX2/DKK1/NRG1/TNNT2/TRIM72/MYLK2/ARRB2/TNNC1/MYLPF/SOX8/UQCC2/MYBPC2/FZD7/DNER/MYF6/TCF23/LBX1/HAND1/EDN1/NEB/PIN1/EOMES/FGF20/MYBPC1/EGR3/LAMA2/ACHE/TBX1/TCF21	30
GO:0051146	striated muscle cell differentiation	24/472	277/18493	2.01751340113408e-07	0.000429629478771502	0.000384389395373967	LMOD3/GATA4/KRT19/P2RX2/DKK1/NRG1/TNNT2/TNNT1/TRIM72/ARRB2/MYOZ1/SLC8A1/MYBPC2/FZD7/DNER/MYF6/IGF2/EDN1/FHL2/NEB/PIN1/MYBPC1/TBX1/WFIKKN1	24
GO:0014706	striated muscle tissue development	28/472	379/18493	5.37340949647987e-07	0.000762845034850259	0.000682517276394987	LMOD3/GATA4/P2RX2/DKK1/NRG1/TNNT2/BMP7/MYLK2/ARRB2/TNNC1/MYLPF/SLC8A1/SOX8/UQCC2/MYBPC2/FZD7/DNER/MYF6/HAND1/EDN1/FHL2/NEB/PIN1/EOMES/FGF20/MYBPC1/TBX1/TCF21	28
GO:0055002	striated muscle cell development	17/472	163/18493	9.69881335941831e-07	0.000926478494385716	0.000828920094827373	LMOD3/GATA4/KRT19/P2RX2/TNNT2/TNNT1/MYOZ1/SLC8A1/MYBPC2/DNER/MYF6/EDN1/FHL2/NEB/PIN1/MYBPC1/WFIKKN1	17
GO:0060537	muscle tissue development	28/472	395/18493	1.22323771619158e-06	0.000926478494385716	0.000828920094827373	LMOD3/GATA4/P2RX2/DKK1/NRG1/TNNT2/BMP7/MYLK2/ARRB2/TNNC1/MYLPF/SLC8A1/SOX8/UQCC2/MYBPC2/FZD7/DNER/MYF6/HAND1/EDN1/FHL2/NEB/PIN1/EOMES/FGF20/MYBPC1/TBX1/TCF21	28
GO:0006936	muscle contraction	26/472	351/18493	1.3052056741757e-06	0.000926478494385716	0.000828920094827373	LMOD3/GATA4/P2RX2/TACR2/MYH1/CHGA/TNNT2/TACR1/TNNT1/TRIM72/MYLK2/CHRNG/TNNC1/MYLPF/SLC8A1/MYBPC2/PTGS2/ATP8A2/TRIM63/MYOT/EDN1/SSPN/NEB/MYBPC1/NDUFS6/MYBPH	26
GO:0030501	positive regulation of bone mineralization	8/472	35/18493	2.17882628233798e-06	0.00132566016235392	0.0011860678409118	NELL1/ISG15/BMP7/BMP6/SLC8A1/ACVR2A/BMPR2/KL	8
GO:0055001	muscle cell development	17/472	176/18493	2.81718730513454e-06	0.001499800091571	0.0013418707953404	LMOD3/GATA4/KRT19/P2RX2/TNNT2/TNNT1/MYOZ1/SLC8A1/MYBPC2/DNER/MYF6/EDN1/FHL2/NEB/PIN1/MYBPC1/WFIKKN1	17
GO:0070169	positive regulation of biomineral tissue development	8/472	44/18493	1.34134528486555e-05	0.00634754396471374	0.00567914611837811	NELL1/ISG15/BMP7/BMP6/SLC8A1/ACVR2A/BMPR2/KL	8
GO:0048738	cardiac muscle tissue development	18/472	224/18493	1.89631242133403e-05	0.00734833545651874	0.00657455403482356	GATA4/DKK1/NRG1/TNNT2/BMP7/MYLK2/ARRB2/TNNC1/SLC8A1/MYBPC2/FZD7/HAND1/EDN1/FHL2/NEB/PIN1/FGF20/MYBPC1	18
GO:0035051	cardiocyte differentiation	15/472	163/18493	1.92827060744309e-05	0.00734833545651874	0.00657455403482356	GATA4/DKK1/NRG1/BMP7/ARRB2/SLC8A1/MYBPC2/FZD7/EDN1/FHL2/NEB/PIN1/EOMES/MYBPC1/JAG1	15
GO:0007389	pattern specification process	27/472	434/18493	2.0704396684251e-05	0.00734833545651874	0.00657455403482356	SOSTDC1/GATA4/DKK1/IRX4/TMEM107/CXXC4/PAX2/DAND5/BMP7/AMHR2/RTTN/LMX1B/MYF6/ACVR2A/LRP5/LBX1/HAND1/EDN1/FEZF1/BMPR2/BARX1/EOMES/HES4/WNT2B/HOXD13/TBX1/HOXB9	27
GO:0060393	regulation of pathway-restricted SMAD protein phosphorylation	9/472	62/18493	2.6004427137774e-05	0.00794517730540417	0.00710854829909741	DKK1/GDF6/BMP7/BMP6/LDLRAD4/BMP3/ACVR2A/BMPR2/PIN1	9
GO:1903793	positive regulation of anion transport	8/472	48/18493	2.61170420933689e-05	0.00794517730540417	0.00710854829909741	TRH/CCK/ABCA7/SLC6A1/ATP8A2/EDN1/PLA2G10/APOE	8
GO:0042692	muscle cell differentiation	24/472	373/18493	3.47813920796808e-05	0.00965119537652459	0.00863492227308585	LMOD3/GATA4/KRT19/P2RX2/DKK1/NRG1/TNNT2/TNNT1/TRIM72/ARRB2/MYOZ1/SLC8A1/MYBPC2/FZD7/DNER/MYF6/IGF2/EDN1/FHL2/NEB/PIN1/MYBPC1/TBX1/WFIKKN1	24
GO:0060389	pathway-restricted SMAD protein phosphorylation	9/472	65/18493	3.82971465505657e-05	0.00965119537652459	0.00863492227308585	DKK1/GDF6/BMP7/BMP6/LDLRAD4/BMP3/ACVR2A/BMPR2/PIN1	9
GO:0001503	ossification	24/472	380/18493	4.67507878744382e-05	0.00965119537652459	0.00863492227308585	DKK1/TPH1/NELL1/ISG15/OMD/BMP7/BMP6/MMP9/GPLD1/BMP3/OSTN/SLC8A1/SOX8/PTGS2/DUOX2/ACVR2A/LRP5/IGF2/FHL2/BMPR2/COL2A1/KL/ACHE/JAG1	24
GO:0003012	muscle system process	27/472	456/18493	4.87871650167749e-05	0.00965119537652459	0.00863492227308585	LMOD3/GATA4/P2RX2/TACR2/MYH1/CHGA/TNNT2/TACR1/TNNT1/TRIM72/MYLK2/CHRNG/TNNC1/MYLPF/SLC8A1/MYBPC2/PTGS2/ATP8A2/TRIM63/MYOT/EDN1/SSPN/NEB/PIN1/MYBPC1/NDUFS6/MYBPH	27
GO:0030239	myofibril assembly	9/472	67/18493	4.89681775487652e-05	0.00965119537652459	0.00863492227308585	LMOD3/KRT19/TNNT2/TNNT1/MYOZ1/MYBPC2/EDN1/NEB/MYBPC1	9
GO:0061458	reproductive system development	26/472	431/18493	4.93364149018134e-05	0.00965119537652459	0.00863492227308585	GATA4/KRT19/PTPRN/BOK/FOXF2/PLAG1/BMP7/BMP6/AMHR2/ARRB2/GATA2/SOX8/PTGS2/TCF23/ACVR2A/REC8/IGF2/HAND1/BMPR2/EOMES/NDUFS6/NR5A1/WNT2B/ETV2/HOXD13/TCF21	26
GO:0030049	muscle filament sliding	7/472	39/18493	5.11542539901124e-05	0.00965119537652459	0.00863492227308585	TNNT2/TNNT1/MYLK2/TNNC1/MYBPC2/NEB/MYBPC1	7
GO:0033275	actin-myosin filament sliding	7/472	39/18493	5.11542539901124e-05	0.00965119537652459	0.00863492227308585	TNNT2/TNNT1/MYLK2/TNNC1/MYBPC2/NEB/MYBPC1	7
GO:0015837	amine transport	11/472	101/18493	5.35894610183555e-05	0.00965119537652459	0.00863492227308585	TACR2/TRH/CHGA/CCK/CXCL12/SYT3/SLC6A1/DTNBP1/SLC18A2/FGF20/RHCG	11
GO:0045778	positive regulation of ossification	10/472	84/18493	5.43856982945739e-05	0.00965119537652459	0.00863492227308585	NELL1/ISG15/BMP7/BMP6/SLC8A1/ACVR2A/LRP5/BMPR2/KL/JAG1	10
GO:0030500	regulation of bone mineralization	9/472	69/18493	6.20454408234972e-05	0.0102331768581035	0.00915562097016465	NELL1/ISG15/OMD/BMP7/BMP6/SLC8A1/ACVR2A/BMPR2/KL	9
GO:0009743	response to carbohydrate	17/472	223/18493	6.24706734704605e-05	0.0102331768581035	0.00915562097016465	GATA4/P2RX2/PTPRN/TRH/PAX2/GPLD1/PTPRN2/PCK1/SLC8A1/CDT1/NR1H4/CDK16/PTGS2/SLC6A1/LRP5/MAFA/TXNIP	17
GO:0030282	bone mineralization	11/472	104/18493	7.0225282980434e-05	0.0110773881560618	0.00991093662335949	NELL1/ISG15/OMD/BMP7/BMP6/SLC8A1/PTGS2/DUOX2/ACVR2A/BMPR2/KL	11
GO:1902430	negative regulation of amyloid-beta formation	4/472	10/18493	7.78694165765998e-05	0.0118444944714192	0.0105972664664395	PRNP/ABCA7/SPON1/APOE	4
GO:0071772	response to BMP	14/472	165/18493	8.83674811842349e-05	0.0125452367454552	0.0112242204170853	SOSTDC1/GATA4/DKK1/GDF6/DAND5/BMP7/BMP6/AMHR2/SFRP5/ACVR2A/BMPR2/COL2A1/TNMD/ETV2	14
GO:0071773	cellular response to BMP stimulus	14/472	165/18493	8.83674811842349e-05	0.0125452367454552	0.0112242204170853	SOSTDC1/GATA4/DKK1/GDF6/DAND5/BMP7/BMP6/AMHR2/SFRP5/ACVR2A/BMPR2/COL2A1/TNMD/ETV2	14
GO:0044070	regulation of anion transport	10/472	91/18493	0.000108013208026	0.0148396210639591	0.0132770055366424	TRH/PRNP/CCK/ABCA7/SLC6A1/ATP8A2/EDN1/PRKG2/PLA2G10/APOE	10
GO:0048608	reproductive structure development	25/472	428/18493	0.000114425245392609	0.0150802127441594	0.0134922628573193	GATA4/KRT19/PTPRN/BOK/FOXF2/PLAG1/BMP7/BMP6/AMHR2/ARRB2/GATA2/SOX8/PTGS2/TCF23/ACVR2A/REC8/IGF2/HAND1/BMPR2/EOMES/NR5A1/WNT2B/ETV2/HOXD13/TCF21	25
GO:0055007	cardiac muscle cell differentiation	12/472	129/18493	0.000116845978059934	0.0150802127441594	0.0134922628573193	GATA4/DKK1/NRG1/ARRB2/SLC8A1/MYBPC2/FZD7/EDN1/FHL2/NEB/PIN1/MYBPC1	12
GO:1902992	negative regulation of amyloid precursor protein catabolic process	4/472	12/18493	0.000176230073834956	0.0220754083665611	0.0197508627641653	PRNP/ABCA7/SPON1/APOE	4
GO:1905207	regulation of cardiocyte differentiation	8/472	64/18493	0.000214487320209124	0.0261000427648759	0.0233517022302865	GATA4/DKK1/NRG1/BMP7/ARRB2/FZD7/EDN1/PIN1	8
GO:0060415	muscle tissue morphogenesis	9/472	82/18493	0.000239547860608642	0.0283398427314502	0.0253556507427861	NRG1/TNNT2/MYLK2/TNNC1/MYBPC2/MYF6/HAND1/MYBPC1/TBX1	9
GO:0003007	heart morphogenesis	17/472	253/18493	0.000286537740631314	0.0329828172256423	0.0295097189497968	GATA4/DKK1/NRG1/TNNT2/BMP7/MYLK2/TNNC1/MYBPC2/LBX1/HAND1/FHL2/BMPR2/COL2A1/MYBPC1/SEC24B/JAG1/TBX1	17
GO:0006937	regulation of muscle contraction	13/472	164/18493	0.00030665733108742	0.0343698308710874	0.0307506797378521	GATA4/TACR2/CHGA/TNNT2/TACR1/TNNT1/MYLK2/TNNC1/SLC8A1/PTGS2/EDN1/RANGRF/MYBPH	13
GO:0070167	regulation of biomineral tissue development	9/472	86/18493	0.000343646080889006	0.0366150985714134	0.0327595202304758	NELL1/ISG15/OMD/BMP7/BMP6/SLC8A1/ACVR2A/BMPR2/KL	9
GO:0045165	cell fate commitment	17/472	257/18493	0.000343884466507757	0.0366150985714134	0.0327595202304758	SOSTDC1/DKK1/NRG1/ARX/PAX2/GATA2/SOX8/IL12B/FZD7/MYF6/LBX1/SPN/EOMES/JAG1/WNT2B/ETV2/TBX1	17
GO:0032526	response to retinoic acid	10/472	105/18493	0.000353208964673193	0.0366906580620276	0.0328271232892673	DKK1/CDKN2D/PAX2/BMP6/PCK1/FZD7/CYP26A1/IGFBP2/TBX1/FZD10	10
GO:0032609	interferon-gamma production	10/472	106/18493	0.000381291024415132	0.0386647255472392	0.0345933210120997	PRNP/ISG15/PYCARD/TNFRSF13C/IL12B/NR1H4/TLR7/CD14/SPN/EOMES	10
GO:0048644	muscle organ morphogenesis	9/472	88/18493	0.000408251707129498	0.0404359074573147	0.0361779970577426	NRG1/TNNT2/MYLK2/TNNC1/MYBPC2/MYF6/HAND1/MYBPC1/TBX1	9
GO:0061448	connective tissue development	17/472	263/18493	0.000448464521101146	0.0428013713352572	0.0382943770427036	GDF6/CYTL1/BMP7/BMP6/MATN4/GPLD1/BMP3/SOX8/NR1H4/LRP5/POC1A/HAND1/EDN1/BMPR2/COL2A1/TNMD/WNT2B	17
GO:0030278	regulation of ossification	14/472	193/18493	0.000452233320048503	0.0428013713352572	0.0382943770427036	DKK1/TPH1/NELL1/ISG15/OMD/BMP7/BMP6/OSTN/SLC8A1/ACVR2A/LRP5/BMPR2/KL/JAG1	14
GO:0031214	biomineral tissue development	12/472	150/18493	0.000476341368496145	0.0441029975744583	0.0394589417381246	NELL1/ISG15/OMD/BMP7/BMP6/SLC8A1/PTGS2/DUOX2/ACVR2A/BMPR2/KL/TBX1	12
GO:0003002	regionalization	20/472	341/18493	0.000514113802041143	0.0465874613381538	0.0416817908933693	SOSTDC1/GATA4/DKK1/TMEM107/CXXC4/PAX2/LMX1B/MYF6/ACVR2A/LRP5/EDN1/FEZF1/BMPR2/BARX1/EOMES/HES4/WNT2B/HOXD13/TBX1/HOXB9	20
GO:0009746	response to hexose	14/472	196/18493	0.000527753412671745	0.046652403464687	0.0417398945989711	GATA4/PTPRN/TRH/PAX2/GPLD1/PTPRN2/PCK1/SLC8A1/NR1H4/CDK16/PTGS2/LRP5/MAFA/TXNIP	14
GO:0030509	BMP signaling pathway	12/472	152/18493	0.000536738147398371	0.046652403464687	0.0417398945989711	SOSTDC1/GATA4/DKK1/GDF6/DAND5/BMP7/BMP6/AMHR2/SFRP5/ACVR2A/BMPR2/ETV2	12
GO:1905209	positive regulation of cardiocyte differentiation	6/472	41/18493	0.000564204482916571	0.0480589378548335	0.0429983205927997	GATA4/NRG1/BMP7/ARRB2/EDN1/PIN1	6
GO:0006865	amino acid transport	11/472	132/18493	0.000576079735179177	0.0481083057280023	0.0430424900175154	SLC7A4/SLC6A15/OCA2/TRH/CCK/SLC6A20/SLC6A11/SLC6A1/SLC1A6/SLC3A1/SLC1A7	11
GO:0055006	cardiac cell development	9/472	93/18493	0.000614488202677275	0.0499806358584177	0.0447176633525221	GATA4/SLC8A1/MYBPC2/EDN1/FHL2/NEB/PIN1/MYBPC1/JAG1	9
GO:0002009	morphogenesis of an epithelium	25/472	479/18493	0.000621970814861736	0.0499806358584177	0.0447176633525221	SOSTDC1/GATA4/MMP12/DKK1/FOXF2/TGM3/SYNE4/PAX2/BMP7/CCL11/ARRB2/SOX8/FOXE1/FZD7/LRP5/LBX1/HAND1/EDN1/SEC24B/JAG1/WNT2B/HOXD13/DACT1/EPHA7/TCF21	25
GO:0051153	regulation of striated muscle cell differentiation	10/472	113/18493	0.000634608418006215	0.050051800968305	0.0447813347598928	LMOD3/DKK1/NRG1/TRIM72/ARRB2/FZD7/MYF6/EDN1/PIN1/TBX1	10
GO:0051952	regulation of amine transport	9/472	94/18493	0.000664519758793074	0.0514579936854491	0.0460394550589651	TACR2/TRH/CHGA/CCK/CXCL12/SYT3/SLC6A1/DTNBP1/FGF20	9
GO:0034284	response to monosaccharide	14/472	201/18493	0.000677440301317528	0.0515217543448456	0.0460965017061927	GATA4/PTPRN/TRH/PAX2/GPLD1/PTPRN2/PCK1/SLC8A1/NR1H4/CDK16/PTGS2/LRP5/MAFA/TXNIP	14
GO:0007271	synaptic transmission, cholinergic	5/472	29/18493	0.000758756918226967	0.055266081565961	0.0494465504056496	TACR2/CHRNG/LAMA2/ACHE/APOE	5
GO:0006271	DNA strand elongation involved in DNA replication	4/472	17/18493	0.000765601975203498	0.055266081565961	0.0494465504056496	RNASEH2A/PCNA/LIG1/GINS2	4
GO:0051782	negative regulation of cell division	4/472	17/18493	0.000765601975203498	0.055266081565961	0.0494465504056496	ZFYVE19/AURKB/CHMP4C/TXNIP	4
GO:0090257	regulation of muscle system process	16/472	252/18493	0.000792245228459729	0.0562362071334997	0.0503145215267407	GATA4/TACR2/CHGA/TNNT2/TACR1/TNNT1/PRKAG3/MYLK2/TNNC1/SLC8A1/PTGS2/TRIM63/EDN1/RANGRF/PIN1/MYBPH	16
GO:0007274	neuromuscular synaptic transmission	5/472	30/18493	0.00089161881296055	0.0588683197994623	0.0526694721207235	P2RX2/MYLK2/CHRNG/RIMBP2/EGR3	5
GO:0007519	skeletal muscle tissue development	12/472	161/18493	0.000894281327024997	0.0588683197994623	0.0526694721207235	LMOD3/P2RX2/DKK1/MYLK2/MYLPF/SOX8/UQCC2/DNER/MYF6/EOMES/TBX1/TCF21	12
GO:0045669	positive regulation of osteoblast differentiation	7/472	61/18493	0.000895653996935522	0.0588683197994623	0.0526694721207235	NELL1/BMP7/BMP6/ACVR2A/LRP5/BMPR2/JAG1	7
GO:0048747	muscle fiber development	7/472	61/18493	0.000895653996935522	0.0588683197994623	0.0526694721207235	LMOD3/P2RX2/MYBPC2/DNER/MYF6/MYBPC1/WFIKKN1	7
GO:0015850	organic hydroxy compound transport	16/472	255/18493	0.000898436437418419	0.0588683197994623	0.0526694721207235	LIPC/CRHR1/CHGA/ABCA7/STARD5/BMP6/CXCL12/SYT3/APOC1/NR1H4/DTNBP1/SLC18A2/PLA2G10/FGF20/SLC2A13/APOE	16
GO:2000027	regulation of animal organ morphogenesis	14/472	208/18493	0.000946300342942551	0.0610650478877625	0.0546348842336847	DKK1/PAX2/BMP7/ARRB2/SOX8/FZD7/EDN1/BMPR2/SEC24B/JAG1/WNT2B/HOXD13/TBX1/DACT1	14
GO:0045214	sarcomere organization	6/472	46/18493	0.00105568181194117	0.0671066990605589	0.0600403481418231	KRT19/TNNT2/TNNT1/MYBPC2/EDN1/MYBPC1	6
GO:0090092	regulation of transmembrane receptor protein serine/threonine kinase signaling pathway	15/472	235/18493	0.0010834726727965	0.0675182590212422	0.0604085707435392	SOSTDC1/GATA4/DKK1/GDF6/DAND5/BMP7/BMP6/DNM2/LDLRAD4/BMP3/SFRP5/ACVR2A/BMPR2/PIN1/WFIKKN1	15
GO:0000280	nuclear division	22/472	416/18493	0.00109386237907155	0.0675182590212422	0.0604085707435392	TDRD9/KIF22/PTTG1/FBXO43/BMP7/CDC25C/MOV10L1/H2AFY/CCDC155/CDT1/NCAPD2/LRP5/REC8/IGF2/EDN1/SYCE2/CCND2/PIN1/TDRD12/FANCD2/AURKB/CHMP4C	22
GO:1902003	regulation of amyloid-beta formation	4/472	19/18493	0.00119741428738682	0.0728541064282924	0.0651825521855683	PRNP/ABCA7/SPON1/APOE	4
GO:0003205	cardiac chamber development	12/472	167/18493	0.00122888518868131	0.0731447571294658	0.0654425973007418	GATA4/NRG1/TNNT2/DAND5/BMP7/DNM2/TNNC1/HAND1/FHL2/BMPR2/JAG1/TBX1	12
GO:0007178	transmembrane receptor protein serine/threonine kinase signaling pathway	19/472	340/18493	0.00124545644783874	0.0731447571294658	0.0654425973007418	SOSTDC1/GATA4/DKK1/GDF6/DAND5/BMP7/BMP6/DNM2/LDLRAD4/BMP3/AMHR2/ARRB2/SFRP5/ACVR2A/BMPR2/LTBP2/PIN1/ETV2/WFIKKN1	19
GO:0009749	response to glucose	13/472	191/18493	0.00128532918257836	0.0731447571294658	0.0654425973007418	GATA4/PTPRN/TRH/PAX2/GPLD1/PTPRN2/PCK1/SLC8A1/NR1H4/CDK16/LRP5/MAFA/TXNIP	13
GO:0009615	response to virus	18/472	315/18493	0.00129295543504553	0.0731447571294658	0.0654425973007418	MMP12/OASL/ISG15/MST1R/PQBP1/CXCL12/CCL11/PYCARD/DMBT1/IL12B/DUOX2/TLR7/RNF216/AZU1/IFI44/APOBEC3B/RNASE2/IFI6	18
GO:0010862	positive regulation of pathway-restricted SMAD protein phosphorylation	6/472	48/18493	0.00132501079885091	0.0731447571294658	0.0654425973007418	GDF6/BMP7/BMP6/BMP3/ACVR2A/BMPR2	6
GO:2000725	regulation of cardiac muscle cell differentiation	6/472	48/18493	0.00132501079885091	0.0731447571294658	0.0654425973007418	DKK1/NRG1/ARRB2/FZD7/EDN1/PIN1	6
GO:0015849	organic acid transport	18/472	316/18493	0.00133958465745441	0.0731447571294658	0.0654425973007418	SLC7A4/SLC6A15/OCA2/TRH/CCK/STARD5/SLC26A7/SLC6A20/SLC6A11/CPT1B/NR1H4/SLC6A1/SLC1A6/EDN1/SLC3A1/SLC1A7/PLA2G10/APOE	18
GO:0046942	carboxylic acid transport	18/472	316/18493	0.00133958465745441	0.0731447571294658	0.0654425973007418	SLC7A4/SLC6A15/OCA2/TRH/CCK/STARD5/SLC26A7/SLC6A20/SLC6A11/CPT1B/NR1H4/SLC6A1/SLC1A6/EDN1/SLC3A1/SLC1A7/PLA2G10/APOE	18
GO:0032892	positive regulation of organic acid transport	5/472	33/18493	0.00139454155000663	0.0742419057684781	0.0664242159345265	TRH/CCK/SLC6A1/EDN1/PLA2G10	5
GO:0060795	cell fate commitment involved in formation of primary germ layer	5/472	33/18493	0.00139454155000663	0.0742419057684781	0.0664242159345265	DKK1/PAX2/FZD7/EOMES/ETV2	5
GO:0060538	skeletal muscle organ development	12/472	170/18493	0.00143158992107865	0.0752733515293083	0.0673470502183849	LMOD3/P2RX2/DKK1/MYLK2/MYLPF/SOX8/UQCC2/DNER/MYF6/EOMES/TBX1/TCF21	12
GO:0010927	cellular component assembly involved in morphogenesis	9/472	105/18493	0.00146848523796639	0.0762716905914492	0.0682402639465766	LMOD3/KRT19/TNNT2/TNNT1/MYOZ1/MYBPC2/EDN1/NEB/MYBPC1	9
GO:0016202	regulation of striated muscle tissue development	11/472	149/18493	0.00156184331468967	0.079515590245563	0.0711425802174808	LMOD3/DKK1/NRG1/ARRB2/UQCC2/FZD7/MYF6/EDN1/PIN1/FGF20/TBX1	11
GO:0060485	mesenchyme development	16/472	269/18493	0.0015682811882196	0.079515590245563	0.0711425802174808	GATA4/NRG1/FOXF2/PAX2/DAND5/BMP7/S100A4/LDLRAD4/SOX8/HAND1/EDN1/BMPR2/EOMES/JAG1/TBX1/TCF21	16
GO:0055013	cardiac muscle cell development	8/472	87/18493	0.00170165404264168	0.0836720605791983	0.0748613732644673	GATA4/SLC8A1/MYBPC2/EDN1/FHL2/NEB/PIN1/MYBPC1	8
GO:0008343	adult feeding behavior	3/472	10/18493	0.00173429277170516	0.0836720605791983	0.0748613732644673	BRS3/DMBX1/ASIP	3
GO:2001054	negative regulation of mesenchymal cell apoptotic process	3/472	10/18493	0.00173429277170516	0.0836720605791983	0.0748613732644673	PAX2/BMP7/TBX1	3
GO:1901861	regulation of muscle tissue development	11/472	151/18493	0.00173747216706006	0.0836720605791983	0.0748613732644673	LMOD3/DKK1/NRG1/ARRB2/UQCC2/FZD7/MYF6/EDN1/PIN1/FGF20/TBX1	11
GO:0003206	cardiac chamber morphogenesis	10/472	129/18493	0.00175342457202971	0.0836720605791983	0.0748613732644673	GATA4/NRG1/TNNT2/BMP7/TNNC1/HAND1/FHL2/BMPR2/JAG1/TBX1	10
GO:0015711	organic anion transport	23/472	460/18493	0.00177413203884089	0.0836720605791983	0.0748613732644673	SLC7A4/SLC6A15/OCA2/TRH/CCK/ABCA7/STARD5/SLC26A7/SLC6A20/SLC6A11/CPT1B/APOC1/NR1H4/SLC6A1/ATP8A2/SLC1A6/EDN1/SLC3A1/PQLC1/SLC1A7/PLA2G10/APOE/SLC2A1	23
GO:0048593	camera-type eye morphogenesis	9/472	108/18493	0.00178778058527989	0.0836720605791983	0.0748613732644673	FOXF2/PAX2/BMP7/SDK2/SOX8/ATP8A2/LRP5/JAG1/WNT2B	9
GO:0051954	positive regulation of amine transport	5/472	35/18493	0.00182937953173148	0.0846883415830908	0.075770639643798	TACR2/TRH/CCK/CXCL12/SLC6A1	5
GO:0055008	cardiac muscle tissue morphogenesis	7/472	69/18493	0.00186050711329421	0.0852032236077421	0.0762313044722697	NRG1/TNNT2/MYLK2/TNNC1/MYBPC2/HAND1/MYBPC1	7
GO:0015696	ammonium transport	9/472	109/18493	0.00190575840950263	0.0863470751709757	0.0772547082015625	TACR2/CXCL12/SYT3/DTNBP1/SLC18A2/EDN1/FGF20/SLC44A3/RHCG	9
GO:0048634	regulation of muscle organ development	11/472	153/18493	0.00192889721057088	0.0864755075770671	0.0773696166456131	LMOD3/DKK1/NRG1/ARRB2/UQCC2/FZD7/MYF6/EDN1/PIN1/FGF20/TBX1	11
GO:0007498	mesoderm development	10/472	131/18493	0.00196621556745228	0.0872303343935339	0.0780449600238734	DKK1/PAX2/DAND5/BMP7/ACVR2A/HAND1/BMPR2/EOMES/ETV2/TBX1	10
GO:0007088	regulation of mitotic nuclear division	12/472	177/18493	0.00201352542335133	0.0881425298077983	0.0788611010502168	PTTG1/BMP7/CDC25C/H2AFY/CDT1/LRP5/IGF2/EDN1/CCND2/PIN1/AURKB/CHMP4C	12
GO:0051783	regulation of nuclear division	13/472	201/18493	0.00202816809607049	0.0881425298077983	0.0788611010502168	PTTG1/FBXO43/BMP7/CDC25C/H2AFY/CDT1/LRP5/IGF2/EDN1/CCND2/PIN1/AURKB/CHMP4C	13
GO:0090596	sensory organ morphogenesis	15/472	251/18493	0.002073841600309	0.0886101992530836	0.0792795247948401	FOXF2/PAX2/BMP7/SDK2/GATA2/SOX8/ATP8A2/USH1C/LRP5/EDN1/COL2A1/SEC24B/JAG1/WNT2B/TBX1	15
GO:0050691	regulation of defense response to virus by host	5/472	36/18493	0.0020805400153342	0.0886101992530836	0.0792795247948401	MMP12/PQBP1/PYCARD/IL12B/RNF216	5
GO:0032703	negative regulation of interleukin-2 production	4/472	22/18493	0.00212708929447275	0.0896957752986083	0.0802507894319056	PRNP/NR1H4/HOMER3/KAT5	4
GO:0051155	positive regulation of striated muscle cell differentiation	7/472	71/18493	0.00219570358418601	0.0916813878926294	0.082027316560922	LMOD3/NRG1/ARRB2/MYF6/EDN1/PIN1/TBX1	7
GO:0009612	response to mechanical stimulus	13/472	204/18493	0.00230989815564522	0.0938503832097285	0.0839679161698984	GATA4/BMP6/CXCL12/PPL/USP53/SLC8A1/PTGS2/ATP8A2/TLR7/EDN1/IGFBP2/SLC2A1/TXNIP	13
GO:1905330	regulation of morphogenesis of an epithelium	10/472	134/18493	0.0023240081411278	0.0938503832097285	0.0839679161698984	DKK1/PAX2/BMP7/ARRB2/SOX8/FZD7/SEC24B/WNT2B/HOXD13/DACT1	10
GO:0010454	negative regulation of cell fate commitment	3/472	11/18493	0.00233968983223279	0.0938503832097285	0.0839679161698984	SOSTDC1/DKK1/FZD7	3
GO:0042535	positive regulation of tumor necrosis factor biosynthetic process	3/472	11/18493	0.00233968983223279	0.0938503832097285	0.0839679161698984	LBP/AZU1/SPN	3
GO:0046661	male sex differentiation	11/472	157/18493	0.00236330586953023	0.0938503832097285	0.0839679161698984	GATA4/BOK/BMP6/AMHR2/SOX8/ACVR2A/REC8/NR5A1/WNT2B/HOXD13/TCF21	11
GO:0001707	mesoderm formation	7/472	72/18493	0.00237986414337889	0.0938503832097285	0.0839679161698984	DKK1/PAX2/BMP7/HAND1/BMPR2/EOMES/ETV2	7
GO:0051216	cartilage development	13/472	206/18493	0.00251499677797345	0.0982694612604489	0.087921664280675	GDF6/CYTL1/BMP7/BMP6/MATN4/GPLD1/BMP3/POC1A/HAND1/EDN1/BMPR2/COL2A1/WNT2B	13
