# Supplementary material for: Identification of Subtype-Specific Metastasis-Related Genetic Signatures in Sarcoma
Source: Front Oncol. 2020 Oct 6;10:544956. doi: 10.3389/fonc.2020.544956 (PMC7573283; doi:10.3389/fonc.2020.544956)
Supplement: Supplementary file 7 [file Table_7.XLS]

ID	Description	GeneRatio	BgRatio	pvalue	p.adjust	qvalue	geneID	Count
GO:0035249	synaptic transmission, glutamatergic	7/164	90/18493	1.52881564587796e-05	0.0351175923369888	0.033140277457454	UNC13C/TNR/GRIK1/GRIA2/GRIK2/GRM7/CDK5	7
GO:0030900	forebrain development	13/164	374/18493	3.00491441223634e-05	0.0351175923369888	0.033140277457454	DUOX2/KIF1A/ALDH1A2/HSD3B2/ROBO2/TNR/NPY/CNTNAP2/SCN5A/CRTAC1/POU3F3/GLI1/CDK5	13
GO:0019226	transmission of nerve impulse	6/164	72/18493	4.27568088518533e-05	0.0351175923369888	0.033140277457454	MYH14/TNR/CNTNAP2/SCN5A/GRIK2/SCN3A	6
GO:0019228	neuronal action potential	4/164	34/18493	0.000224695173386542	0.096032756889737	0.0906255809848894	MYH14/SCN5A/GRIK2/SCN3A	4
GO:0044146	negative regulation of growth of symbiont involved in interaction with host	3/164	14/18493	0.000231984100772419	0.096032756889737	0.0906255809848894	LBP/MPO/CAMP	3
GO:0044144	modulation of growth of symbiont involved in interaction with host	3/164	15/18493	0.000288094699700549	0.096032756889737	0.0906255809848894	LBP/MPO/CAMP	3
GO:0051966	regulation of synaptic transmission, glutamatergic	5/164	67/18493	0.000319802033594759	0.096032756889737	0.0906255809848894	TNR/GRIK1/GRIK2/GRM7/CDK5	5
GO:0021537	telencephalon development	9/164	248/18493	0.000378426980530736	0.096032756889737	0.0906255809848894	HSD3B2/ROBO2/TNR/NPY/CNTNAP2/SCN5A/CRTAC1/POU3F3/CDK5	9
GO:0042391	regulation of membrane potential	12/164	424/18493	0.000410911749185098	0.096032756889737	0.0906255809848894	NTSR1/MYH14/SCN5A/KCND3/SLC1A6/PRKCZ/GRIA2/GRIK2/SCN3A/ASIC2/IFI6/CDK5	12
GO:0016999	antibiotic metabolic process	7/164	152/18493	0.000418389383261225	0.096032756889737	0.0906255809848894	DUOX2/CYP4B1/DUOXA2/MAOB/MPO/NANP/OGDHL	7
GO:0044110	growth involved in symbiotic interaction	3/164	18/18493	0.000506666330992931	0.096032756889737	0.0906255809848894	LBP/MPO/CAMP	3
GO:0044116	growth of symbiont involved in interaction with host	3/164	18/18493	0.000506666330992931	0.096032756889737	0.0906255809848894	LBP/MPO/CAMP	3
GO:0071625	vocalization behavior	3/164	18/18493	0.000506666330992931	0.096032756889737	0.0906255809848894	MYH14/BRINP1/CNTNAP2	3
