# Supplementary material for: Identification of Subtype-Specific Metastasis-Related Genetic Signatures in Sarcoma
Source: Front Oncol. 2020 Oct 6;10:544956. doi: 10.3389/fonc.2020.544956 (PMC7573283; doi:10.3389/fonc.2020.544956)
Supplement: Supplementary file 8 [file Table_8.XLS]

ID	Description	GeneRatio	BgRatio	pvalue	p.adjust	qvalue	geneID	Count
hsa00071	Fatty acid degradation	5/13	38/751	0.000243501129828798	0.00340901581760317	0.00256316978767156	125/33/124/23305/34	5
hsa00061	Fatty acid biosynthesis	2/13	11/751	0.0139433676507898	0.0898277951733292	0.0675396956190445	2194/23305	2
hsa00010	Glycolysis / Gluconeogenesis	3/13	35/751	0.0192488132514277	0.0898277951733292	0.0675396956190445	125/124/2026	3
hsa00982	Drug metabolism - cytochrome P450	3/13	48/751	0.0445470361014633	0.155914626355122	0.117229042372272	125/2327/124	3
hsa00350	Tyrosine metabolism	2/13	25/751	0.0663089136516759	0.185664958224692	0.139597712950897	125/124	2
