# Supplementary material for: Identification of Subtype-Specific Metastasis-Related Genetic Signatures in Sarcoma
Source: Front Oncol. 2020 Oct 6;10:544956. doi: 10.3389/fonc.2020.544956 (PMC7573283; doi:10.3389/fonc.2020.544956)
Supplement: Supplementary file 9 [file Table_9.XLS]

		gName	Pvalue	HR	Low.95.CI.	High.95.CI.	Logrank	Sctest	Waldtest	Expr_median(log2)	Expr_mean��log2��
DL	TCGA	PCK1	0.019797393	0.02522018	0.001141343	0.5572884	6.63E-05	0.00824779	0.019797393	0.0218075	0.3067275
		TPBGL	0.000199931	2.19796417	1.451363216	3.3286268	3.83E-04	0.000114137	0.000199931	1.12268906	1.2897228
		ODF2L	0.000566309	4.66878481	1.944119608	11.2120425	7.28E-04	0.000543294	0.000566309	1.64212178	1.6587024
		CC2D1A	0.007181683	0.39708843	0.202510339	0.7786231	3.44E-03	0.00889088	0.007181683	3.26125814	3.2650728
		PPBP	0.00108669	1.67372479	1.228831736	2.2796894	6.05E-03	0.000290946	0.00108669	0.07970727	0.3723239
		CEMIP	0.004158909	1.32407627	1.092789007	1.6043151	8.61E-03	0.00278176	0.004158909	0.89271222	1.6179752
		ESYT1	0.02528142	0.45413822	0.227426442	0.9068494	1.37E-02	0.02536718	0.02528142	4.27211315	4.4057595
		SERPINE1	0.014940045	1.26437791	1.046731697	1.5272792	1.65E-02	0.014041126	0.014940045	4.79146337	5.0805806
	GSE21050	SERPINE1	0.012404976	1.66735251	1.116836611	2.4892311	0.006400663	0.008132655	0.012404976	7.801934	7.984741
		PCK1	0.045889136	0.68099925	0.467024257	0.9930105	0.009672196	0.023120201	0.045889136	3.757173	5.300285
		ESYT1	0.008728028	0.34533573	0.156006649	0.7644339	0.010112985	0.011585862	0.008728028	8.422559	8.49743
		CC2D1A	0.02414492	0.02163862	0.000772953	0.6057675	0.014677902	0.040772893	0.02414492	5.376417	5.379125
		TPBGL	0.005041451	2.23627619	1.274217794	3.9247068	0.021186277	0.002427376	0.005041451	5.181204	5.224021
		PPBP	0.011694883	2.49037995	1.225219163	5.0619452	0.025672079	0.007151216	0.011694883	3.517648	3.781606
		CEMIP	0.030021893	1.47912412	1.038582089	2.1065337	0.038571534	0.023118525	0.030021893	5.570402	6.13993
		ODF2L	0.04470461	3.32075499	1.028781231	10.7189103	0.046165031	0.041444009	0.04470461	5.089661	5.14933
LMS	TCGA	PTTG1	8.92E-06	1.8825456	1.42402093	2.4887119	2.18E-06	6.95E-06	8.92E-06	4.6634157	4.4284237
		SPC24	1.26E-05	1.8979874	1.42358359	2.5304844	6.88E-06	9.04E-06	1.26E-05	3.14702616	3.2636346
		POC1A	8.23E-05	2.2709368	1.50972712	3.4159512	3.25E-05	5.61E-05	8.23E-05	2.99002508	2.9220238
		KIF20A	1.39E-04	1.6697316	1.28266037	2.1736101	6.14E-05	1.00E-04	1.39E-04	3.5811502	3.3914253
		MXD3	4.26E-05	2.0982488	1.47136232	2.9922255	6.66E-05	3.83E-05	4.26E-05	2.18658964	2.2543949
		APEX2	7.56E-05	2.5423378	1.60165492	4.0355018	1.33E-04	5.29E-05	7.56E-05	3.58574486	3.6301079
		RTTN	9.77E-05	2.753757	1.65432015	4.5838633	1.39E-04	7.99E-05	9.77E-05	1.41436938	1.5523466
		CENPM	1.95E-04	1.6911956	1.28268817	2.2298036	1.49E-04	1.54E-04	1.95E-04	2.99291659	2.9479844
		PQBP1	1.61E-04	2.3698295	1.51390654	3.7096687	2.67E-04	1.41E-04	1.61E-04	5.14811332	5.2455184
		LPIN1	6.30E-04	0.3489605	0.19081333	0.638181	3.44E-04	7.97E-04	6.30E-04	2.10050949	2.137978
		GLB1L2	4.03E-03	0.559465	0.37658336	0.8311601	6.47E-04	2.53E-03	4.03E-03	0.21588252	0.7439553
		ATP2A1.AS1	4.82E-04	1.5214228	1.20202617	1.9256879	6.68E-04	3.91E-04	4.82E-04	2.0586832	2.1793532
		RAD51AP1	1.46E-03	1.8221053	1.25925156	2.6365404	1.29E-03	1.37E-03	1.46E-03	2.24534013	2.297756
		LIG1	1.39E-03	1.8736234	1.27507212	2.7531499	1.37E-03	1.29E-03	1.39E-03	2.93673478	2.9604331
		CNTN3	2.15E-02	0.2502379	0.07683302	0.8150016	2.24E-03	1.49E-02	2.15E-02	0.03575437	0.2943466
		CCHCR1	2.16E-03	1.6547309	1.19947479	2.2827778	2.36E-03	1.96E-03	2.16E-03	3.37464058	3.4192256
		MAP6	6.96E-03	0.6281771	0.44815737	0.8805088	3.17E-03	6.14E-03	6.96E-03	0.76307114	1.1058784
		MCM5	5.51E-03	1.8327687	1.19481413	2.8113504	4.15E-03	5.07E-03	5.51E-03	3.85053591	3.8018346
		ISG15	6.59E-03	1.3814263	1.09420825	1.744036	6.15E-03	6.19E-03	6.59E-03	5.78653591	5.8026496
		PARD3B	7.66E-03	0.5049844	0.30563056	0.8343709	6.97E-03	7.24E-03	7.66E-03	1.57515394	1.5524851
		ZNF700	8.08E-03	1.6278307	1.13509711	2.3344547	7.77E-03	7.33E-03	8.08E-03	2.52973565	2.6488923
		CES4A	2.27E-02	0.4085658	0.1891451	0.8825289	8.25E-03	1.88E-02	2.27E-02	0.19973972	0.3756114
		NTHL1	1.28E-02	1.7693487	1.12928385	2.7721948	1.35E-02	1.29E-02	1.28E-02	2.77757431	2.8227362
		EPHA7	2.54E-02	0.6191224	0.40665788	0.9425921	1.49E-02	2.32E-02	2.54E-02	0.29581374	0.6830786
		C10orf25	3.33E-02	0.5566015	0.32454603	0.9545803	2.65E-02	3.38E-02	3.33E-02	1.196956	1.1907701
		SEPT7P9	1.89E-02	1.7260376	1.09448373	2.7220193	3.11E-02	1.72E-02	1.89E-02	0.2463886	0.430003
	GSE21050	ZNF700	0.001195757	1.6705002	1.22471785	2.2785418	0.000848464	0.000943399	0.001195757	7.518591	7.592663
		PTTG1	0.006230061	1.5933531	1.14117661	2.2246986	0.003127454	0.005614383	0.006230061	10.052683	9.922129
		CENPM	0.004822945	1.7812422	1.19228468	2.6611293	0.004467223	0.004699007	0.004822945	7.055384	7.097364
		PARD3B	0.007774736	0.1296448	0.02880217	0.5835596	0.005638743	0.009171497	0.007774736	4.567562	4.589449
		CNTN3	0.017458891	0.7736268	0.62605985	0.9559764	0.006300953	0.012962254	0.017458891	3.28293	4.430879
		NTHL1	0.006848853	2.9939954	1.35225729	6.6289224	0.00672145	0.006333988	0.006848853	6.374337	6.35153
		EPHA7	0.029989642	0.506747	0.27427345	0.9362646	0.007062463	0.022983661	0.029989642	3.408764	3.834726
		LPIN1	0.005549069	0.5434191	0.35314075	0.8362226	0.00748735	0.008173118	0.005549069	6.987064	7.038899
		GLB1L2	0.027349032	0.4301706	0.2033365	0.9100518	0.010362308	0.024838497	0.027349032	5.572352	5.746371
		KIF20A	0.020391169	1.4228852	1.05613223	1.916997	0.014132171	0.018996833	0.020391169	7.931944	7.717775
		CCHCR1	0.015681304	2.1144925	1.15189284	3.8815055	0.014570039	0.014342125	0.015681304	6.558718	6.524148
		C10orf25	0.020077439	0.5383992	0.31946016	0.9073861	0.01508882	0.018630893	0.020077439	5.138375	5.276947
		RAD51AP1	0.020446593	1.6060861	1.07593645	2.3974582	0.017955193	0.021403102	0.020446593	7.600543	7.661087
		MAP6	0.030457784	0.384459	0.16175511	0.9137809	0.020530359	0.027886412	0.030457784	4.850483	4.940402
		MCM5	0.030306369	1.5706121	1.04389254	2.3630998	0.022719968	0.02948322	0.030306369	7.940933	7.818094
		ATP2A1.AS1	0.014695677	1.51639	1.08532476	2.1186642	0.023964014	0.013738436	0.014695677	5.141447	5.342058
		APEX2	0.026239459	2.6541672	1.12228264	6.2770313	0.025765461	0.025405378	0.026239459	6.498208	6.515345
		ISG15	0.028684269	1.3081479	1.02836788	1.6640455	0.028032728	0.028406164	0.028684269	9.46845	9.583147
		POC1A	0.028376932	2.2548735	1.08989631	4.6650809	0.029466115	0.02699754	0.028376932	5.549754	5.607548
		PQBP1	0.027459952	2.4173585	1.10302871	5.2977969	0.029630147	0.026359313	0.027459952	7.635903	7.676096
		RTTN	0.032658318	3.0108192	1.09522534	8.2768649	0.033756277	0.031948736	0.032658318	4.982817	4.989466
		SPC24	0.034828119	1.7355786	1.04007152	2.8961788	0.03478139	0.0338836	0.034828119	6.768186	6.840554
		CES4A	0.048610807	0.4041435	0.16423685	0.9944904	0.03943489	0.049200317	0.048610807	5.749087	5.83696
		MXD3	0.040694048	2.8582372	1.04547736	7.8141531	0.043403332	0.040554356	0.040694048	7.328303	7.368256
		LIG1	0.043184815	1.7425816	1.01716278	2.9853536	0.04600371	0.043500624	0.043184815	7.399675	7.48062
		SEPT7P9	0.044793319	2.3467163	1.0200189	5.3989953	0.052672237	0.044428729	0.044793319	4.395839	4.417757
UPS	TCGA	C1QTNF4	0.018363928	0.03602364	0.002274715	0.5704901	0.000942735	1.39E-02	0.018363928	0.2236864	0.3612325
		ZBED4	0.000904229	3.01322516	1.570825982	5.7800966	0.00145125	6.58E-04	0.000904229	1.9971439	2.0581767
		PNPLA3	0.001018975	3.11531842	1.581539107	6.1365595	0.005973993	2.47E-05	0.001018975	0.1757887	0.3037918
		NUP50	0.00642253	2.93372538	1.352928889	6.3615647	0.006976793	5.46E-03	0.00642253	2.9824944	3.0028435
		COL13A1	0.011294696	1.63369459	1.117517508	2.3882919	0.021228377	7.96E-03	0.011294696	0.8230354	1.1486682
		TSR1	0.033743722	1.91985382	1.051401279	3.5056441	0.041184909	3.11E-02	0.033743722	3.1223337	3.2268234
	GSE21050	NUP50	0.003919373	3.6407789	1.5131559	8.7600164	0.004172991	0.003730276	0.003919373	6.072029	6.113339
		C1QTNF4	0.017293487	0.3097665	0.1180228	0.8130234	0.005472721	0.02517489	0.017293487	3.960285	4.05289
		PNPLA3	0.002131607	1.9093753	1.2636786	2.8850009	0.006456176	0.00164292	0.002131607	4.972133	5.074327
		TSR1	0.012365806	2.3401233	1.2020926	4.5555368	0.015495847	0.012232042	0.012365806	7.108849	7.140602
		ZBED4	0.015393366	2.4839919	1.1899041	5.1854732	0.016548425	0.014351296	0.015393366	5.668613	5.731965
		COL13A1	0.012290048	1.6668039	1.117346	2.4864594	0.017207755	0.011628498	0.012290048	5.79357	5.959902
