# Supplementary material for: Identification of Subtype-Specific Metastasis-Related Genetic Signatures in Sarcoma
Source: Front Oncol. 2020 Oct 6;10:544956. doi: 10.3389/fonc.2020.544956 (PMC7573283; doi:10.3389/fonc.2020.544956)
Supplement: Supplementary file 10 [file Table_10.XLS]

	qvals	combined_scores	pvals	sig_id	scores	zscores	Name	Url	Pattern
DL	7.07E-05	15.04262222	2.22E-09	CPC014_SKB_24H:BRD-K49865102-001-02-7:10	0.083044983	-1.738166683	PD-0325901	http://www.selleckchem.com/products/PD-0325901.html	similar
DL	0.000140054	13.8795928	1.64E-08	CPC018_A375_6H:BRD-K17561142-003-16-8:10	0.076124567	-1.782572545	amiodarone	http://en.wikipedia.org/wiki/Amiodarone,http://www.selleckchem.com/products/amiodarone-hcl.html	similar
DL	0.004427893	10.02824615	1.41E-06	CPC013_MCF7_24H:BRD-K56287385-001-01-4:10	0.069204152	-1.713732311	ST-001903	NULL	similar
DL	0.004427893	9.921617335	1.76E-06	CPC013_SKB_24H:BRD-K71823332-001-01-1:10	0.065743945	-1.724032785	epothilone-a	http://www.sigmaaldrich.com/catalog/product/sigma/e3656?lang=en&region=US,http://www.selleckchem.com/products/Epothilone-A.html	similar
DL	0.004427893	10.0196994	1.65E-06	CPC012_MCF7_24H:BRD-K48935217-001-01-3:10	0.065743945	-1.732877045	epothilone	http://en.wikipedia.org/wiki/Epothilone	similar
DL	0.019878865	8.67872408	1.44E-05	MUC.CP003_MCF7_24H:BRD-K67870070-001-01-4:10.143	0.062283737	-1.79246493	SA-247615	NULL	similar
DL	0.0178503	7.988302171	1.13E-05	CPC004_PC3_24H:BRD-A15415227-003-01-1:10	0.062283737	-1.614279184	GW-1929	NULL	similar
DL	0.04925807	7.322588161	8.05E-05	MUC.CP006_MCF7_24H:BRD-K11072542-001-06-3:10	0.058823529	-1.788632226	BRD-K11072542	NULL	similar
DL	0.044676133	7.028618461	6.57E-05	CPC007_PC3_6H:BRD-K23935793-001-06-3:10	0.055363322	-1.680635708	BRD-K23935793	NULL	similar
DL	0.043783532	7.230045521	6.24E-05	CPC011_VCAP_6H:BRD-K82357231-001-11-8:10	0.055363322	-1.719601878	desloratadine	http://en.wikipedia.org/wiki/Desloratadine,http://www.selleckchem.com/products/desloratadine.html	similar
DL	7.07E-05	-13.82976517	4.96E-09	CPC019_MCF7_24H:BRD-K71138616-001-01-1:10	-0.079584775	1.665248866	BRD-K71138616	NULL	opposite
DL	0.000263376	-12.55457097	4.15E-08	CPC017_MCF7_24H:BRD-K27665173-001-01-3:10	-0.076124567	1.700818367	D-64406	NULL	opposite
DL	0.000102759	-15.15462598	9.60E-09	CPC006_HA1E_6H:BRD-K86682249-001-05-7:10	-0.07266436	1.89015723	BRD-K86682249	NULL	opposite
DL	0.011700526	-9.366094059	6.37E-06	CPC007_MCF7_6H:BRD-K78843060-019-02-0:10	-0.062283737	1.802618341	BRD-K78843060	NULL	opposite
DL	0.010853877	-9.48373787	5.50E-06	CPC006_RMUGS_6H:BRD-A80213327-305-03-4:160	-0.062283737	1.803013836	NSC-23766	http://www.selleckchem.com/products/nsc-23766.html	opposite
DL	0.00854433	-10.11845288	3.59E-06	CPC006_HCC515_6H:BRD-K81651477-001-03-5:20	-0.062283737	1.858443521	parthenolide	http://en.wikipedia.org/wiki/Parthenolide,http://www.selleckchem.com/products/Parthenolide((-)-Parthenolide).html	opposite
DL	0.026600323	-7.982555662	3.04E-05	CPC008_PC3_24H:BRD-K87726525-001-05-6:10	-0.058823529	1.767439464	BRD-K87726525	NULL	opposite
DL	0.026600323	-7.72938082	3.04E-05	CPC013_VCAP_6H:BRD-K59460069-001-01-7:10	-0.058823529	1.71138333	BRD-K59460069	NULL	opposite
DL	0.02693768	-7.671513161	3.21E-05	CPC014_MCF7_6H:BRD-A52886023-001-01-7:10	-0.058823529	1.707206941	antimycin-a	http://en.wikipedia.org/wiki/Antimycin_A	opposite
DL	0.022864531	-8.405469128	1.87E-05	CPC007_A375_6H:BRD-K75315865-001-02-7:10	-0.058823529	1.77769192	BRD-K75315865	NULL	opposite
DL	0.023607974	-8.439250551	2.21E-05	CPC006_HT29_6H:BRD-K81651477-001-03-5:20	-0.058823529	1.812391735	parthenolide	http://en.wikipedia.org/wiki/Parthenolide,http://www.selleckchem.com/products/Parthenolide((-)-Parthenolide).html	opposite
DL	0.023607974	-8.220002525	2.09E-05	CPC011_VCAP_24H:BRD-K73109821-001-16-9:10	-0.058823529	1.756322588	diazoxide	http://en.wikipedia.org/wiki/Diazoxide	opposite
DL	0.03875833	-7.651713741	5.34E-05	CPC008_HT29_6H:BRD-K63178889-001-01-7:10	-0.055363322	1.790949266	BRD-K63178889	NULL	opposite
DL	0.047482299	-7.499871095	7.10E-05	CPC004_PC3_6H:BRD-K78126613-001-16-0:10	-0.055363322	1.807710386	menadione	http://en.wikipedia.org/wiki/Menadione	opposite
DL	0.04925807	-6.832485482	8.05E-05	CPC020_HCC515_6H:BRD-A25088322-001-01-2:10	-0.055363322	1.668898657	CVF-SUMO-7	NULL	opposite
DL	0.049099194	-7.431012065	7.57E-05	CPC013_HT29_6H:BRD-K66254772-001-01-3:10	-0.051903114	1.803242446	RS-I-002-6	NULL	opposite
LMS	1.05E-05	16.95680839	2.97E-10	LJP001_BT20_24H:BRD-K51313569-001-03-7:2	0.082152975	-1.779695591	palbociclib	http://en.wikipedia.org/wiki/Palbociclib,http://www.selleckchem.com/products/pd-0332991-palbociclib-isethionate.html	similar
LMS	1.05E-05	15.90416853	4.93E-10	CPC015_MCF7_24H:BRD-K34014345-001-03-4:10	0.079320113	-1.708761685	naproxol	http://www.ebi.ac.uk/chebi/searchId.do?chebiId=CHEBI:61022	similar
LMS	0.000137372	12.17739728	2.57E-08	CPC006_HCC515_24H:BRD-A52650764-001-01-0:10	0.073654391	-1.604284405	ingenol	http://www.scbt.com/datasheet-202184-ingenol.html	similar
LMS	7.48E-05	13.9396266	6.99E-09	CPC010_MCF7_24H:BRD-K65955264-005-03-8:10	0.073654391	-1.709204127	BRD-K65955264	NULL	similar
LMS	0.000137372	13.29584252	1.75E-08	CPC015_MCF7_24H:BRD-A34751532-001-04-4:10	0.073654391	-1.714119083	homosalate	http://en.wikipedia.org/wiki/Homosalate	similar
LMS	0.00044838	10.71194401	1.78E-07	CPC006_MCF7_24H:BRD-K61829047-001-01-6:10	0.07082153	-1.587086364	7b-cis	NULL	similar
LMS	0.000430387	10.91646883	1.61E-07	CPC004_PC3_24H:BRD-K80431395-001-02-4:10	0.067988669	-1.606885815	triciribine	https://www.caymanchem.com/app/template/Product.vm/catalog/10010237,http://www.selleckchem.com/products/Triciribine.html	similar
LMS	0.000146878	13.80719897	3.09E-08	LJP001_MDAMB231_24H:BRD-K51313569-001-03-7:2	0.067988669	-1.838426565	palbociclib	http://en.wikipedia.org/wiki/Palbociclib,http://www.selleckchem.com/products/pd-0332991-palbociclib-isethionate.html	similar
LMS	0.001098101	9.652042801	6.34E-07	CPC001_HCC515_24H:BRD-K59469039-001-03-1:10	0.067988669	-1.557243585	AG-879	NULL	similar
LMS	0.000395282	11.32704907	1.25E-07	CPC006_HT29_24H:BRD-K68065987-300-03-4:10	0.067988669	-1.640537205	MK-2206	http://www.selleckchem.com/products/MK-2206.html	similar
LMS	0.000272979	12.29889482	7.65E-08	CPC016_MCF7_24H:BRD-K07762753-001-02-8:10	0.067988669	-1.72828914	aminopurvalanol-a	http://www.tocris.com/dispprod.php?ItemId=102615#.Ud2dWvmeQmc	similar
LMS	0.000137372	14.10349921	2.04E-08	LJP001_MDAMB231_24H:BRD-K51313569-001-03-7:10	0.067988669	-1.834009929	palbociclib	http://en.wikipedia.org/wiki/Palbociclib,http://www.selleckchem.com/products/pd-0332991-palbociclib-isethionate.html	similar
LMS	0.001098101	10.95122157	6.35E-07	CPC019_A549_24H:BRD-K08448573-001-01-3:10	0.065155807	-1.767101983	BRD-K08448573	NULL	similar
LMS	0.00170966	10.27708973	1.19E-06	ERG005_VCAP_48H:BRD-A61304759-001-01-0:5	0.065155807	-1.734798648	tanespimycin	http://en.wikipedia.org/wiki/Tanespimycin,http://www.selleckchem.com/products/17-AAG(Geldanamycin).html	similar
LMS	0.0009386	10.44281225	4.82E-07	CPC008_A375_24H:BRD-K30836161-019-01-1:10	0.065155807	-1.65322474	BRD-K30836161	NULL	similar
LMS	0.000606418	10.96671353	2.83E-07	CPC009_MCF7_24H:BRD-K18724229-019-01-5:10	0.065155807	-1.674887096	BRD-K18724229	NULL	similar
LMS	0.000572324	10.65811952	2.54E-07	CPC004_VCAP_24H:BRD-K87343924-001-02-4:10	0.065155807	-1.616056699	wortmannin	http://en.wikipedia.org/wiki/Wortmannin,http://www.selleckchem.com/products/wortmannin.html	similar
LMS	0.00115709	10.68025986	7.03E-07	CPC017_A549_24H:BRD-K14618467-003-01-8:10	0.065155807	-1.735726001	IKK-16	http://www.scbt.com/datasheet-204009-ikk-16.html,http://www.selleckchem.com/products/ikk-16.html	similar
LMS	0.00170966	10.22081335	1.15E-06	CPC017_A549_24H:BRD-K05151076-001-01-8:10	0.065155807	-1.721222514	ZK-164015	NULL	similar
LMS	0.004154965	8.375676803	4.56E-06	CPC006_A375_24H:BRD-K33272502-001-01-2:40	0.062322946	-1.568223339	DG-041	NULL	similar
LMS	0.00408593	9.221675599	4.30E-06	CPC019_MCF7_24H:BRD-K77480336-001-02-8:10	0.062322946	-1.718207788	BRD-K77480336	NULL	similar
LMS	0.002626103	10.01338654	2.31E-06	HOG003_A549_24H:BRD-K06792661-001-01-9:3.3333	0.062322946	-1.776457906	narciclasine	http://www.tocris.com/dispprod.php?ItemId=239525#.Uebmlo2G2So	similar
LMS	0.002626103	9.39129788	2.17E-06	CPC008_MCF7_24H:BRD-K30836161-019-01-1:10	0.062322946	-1.657917204	BRD-K30836161	NULL	similar
LMS	0.002626103	9.052056448	2.24E-06	CPC001_VCAP_24H:BRD-K97365803-001-01-3:10	0.062322946	-1.601964972	PI-828	NULL	similar
LMS	0.002549828	9.994020278	1.97E-06	CPC016_MCF7_24H:BRD-A35588707-001-03-0:10	0.062322946	-1.751336602	teniposide	http://en.wikipedia.org/wiki/Teniposide	similar
LMS	0.001831536	10.44204921	1.37E-06	CPC019_A549_24H:BRD-K31706415-001-01-7:10	0.062322946	-1.780834876	BRD-K31706415	NULL	similar
LMS	0.006073981	9.061643138	7.09E-06	CPD003_MCF7_24H:BRD-K70358946-001-09-0:10	0.059490085	-1.759852761	aripiprazole	http://en.wikipedia.org/wiki/Aripiprazole,http://www.selleckchem.com/products/aripiprazole-abilify.html	similar
LMS	0.00437529	9.118346647	4.91E-06	CPC013_VCAP_24H:BRD-K63068307-001-01-4:10	0.059490085	-1.717433371	ZSTK-474	NULL	similar
LMS	0.010617367	8.273428844	1.51E-05	CPC017_A549_24H:BRD-A38030642-001-01-2:10	0.059490085	-1.716411917	cyclosporin-a	http://en.wikipedia.org/wiki/Cyclosporin_A,http://www.chem.ox.ac.uk/mom/cyclosporina/	similar
LMS	0.006586058	8.796560877	8.00E-06	CPC015_MCF7_24H:BRD-K98490050-001-01-8:10	0.059490085	-1.72586282	amsacrine	http://en.wikipedia.org/wiki/Amsacrine	similar
LMS	0.006517305	8.954940796	7.76E-06	CPC017_MCF7_24H:BRD-K14821540-001-03-9:10	0.059490085	-1.752469976	FCCP	NULL	similar
LMS	0.005833515	8.871649019	6.68E-06	CPC015_A549_24H:BRD-A58564983-001-03-8:10	0.059490085	-1.714192932	selamectin	http://en.wikipedia.org/wiki/Selamectin	similar
LMS	0.002626103	9.909954776	2.33E-06	CPC014_VCAP_24H:BRD-K51313569-001-02-9:10	0.059490085	-1.759442643	palbociclib	http://en.wikipedia.org/wiki/Palbociclib,http://www.selleckchem.com/products/pd-0332991-palbociclib-isethionate.html	similar
LMS	0.002626103	9.437480245	2.11E-06	CPC006_MCF7_24H:BRD-K68548958-001-01-2:20	0.059490085	-1.662629557	BRD-K68548958	NULL	similar
LMS	0.011315624	7.596735246	1.69E-05	CPC005_A549_24H:BRD-K69023402-001-02-5:10	0.059490085	-1.592047389	thapsigargin	http://en.wikipedia.org/wiki/Thapsigargin	similar
LMS	0.002827725	9.201257044	2.58E-06	CPC005_MCF7_24H:BRD-K47150025-001-01-2:10	0.059490085	-1.646305648	KI-8751	http://www.selleckchem.com/products/Ki8751.html	similar
LMS	0.003227175	10.09316627	3.24E-06	LJP001_BT20_6H:BRD-K51313569-001-03-7:2	0.059490085	-1.838716956	palbociclib	http://en.wikipedia.org/wiki/Palbociclib,http://www.selleckchem.com/products/pd-0332991-palbociclib-isethionate.html	similar
LMS	0.00675107	8.940015088	8.49E-06	CPD001_MCF7_24H:BRD-K63630713-001-20-9:10	0.059490085	-1.762956562	etacrynic-acid	http://en.wikipedia.org/wiki/Etacrynic_acid	similar
LMS	0.015053844	7.77288552	2.43E-05	CPC011_VCAP_24H:BRD-A64297288-001-07-0:10	0.056657224	-1.684251475	amlodipine	http://en.wikipedia.org/wiki/Amlodipine,http://www.selleckchem.com/products/Amlodipine(Norvasc).html	similar
LMS	0.016357927	7.369349356	2.71E-05	CPC005_MCF7_24H:BRD-K63630713-001-15-9:10	0.056657224	-1.613767909	etacrynic-acid	http://en.wikipedia.org/wiki/Etacrynic_acid	similar
LMS	0.02425227	7.521934127	4.53E-05	CPC017_MCF7_24H:BRD-K05151076-001-01-8:10	0.056657224	-1.731691131	ZK-164015	NULL	similar
LMS	0.02423293	7.094631608	4.41E-05	CPC009_MCF7_24H:BRD-K18726304-019-01-8:10	0.056657224	-1.629031277	BRD-K18726304	NULL	similar
LMS	0.030480348	7.361201838	6.18E-05	LJP001_BT20_24H:BRD-K51313569-001-03-7:0.4	0.056657224	-1.748912365	palbociclib	http://en.wikipedia.org/wiki/Palbociclib,http://www.selleckchem.com/products/pd-0332991-palbociclib-isethionate.html	similar
LMS	0.012018651	8.25884704	1.82E-05	CPC018_MCF7_24H:BRD-K67439147-001-01-7:10	0.056657224	-1.742826515	SIB-1893	NULL	similar
LMS	0.011216583	8.02147839	1.62E-05	CPC009_MCF7_24H:BRD-K00313977-019-01-1:10	0.056657224	-1.674880916	BRD-K00313977	NULL	similar
LMS	0.014036159	8.043266352	2.23E-05	CPC016_MCF7_24H:BRD-K94841585-001-02-8:10	0.056657224	-1.7290736	emodic-acid	http://pubchem.ncbi.nlm.nih.gov/summary/summary.cgi?sid=57588025	similar
LMS	0.012538954	8.228160477	1.93E-05	CVD001_HEPG2_24H:BRD-K67439147-001-01-7:2.5	0.056657224	-1.745573198	SIB-1893	NULL	similar
LMS	0.026059047	7.331160878	4.99E-05	CPC010_A549_24H:BRD-K78385490-019-02-2:10	0.053824363	-1.704222523	BRD-K78385490	NULL	similar
LMS	0.026059047	6.929309523	4.99E-05	CPC003_HCC515_24H:BRD-K15616905-001-01-5:10	0.053824363	-1.610807013	CCCP	http://www.tocris.com/dispprod.php?ItemId=2108#.Ud7tIfmeQmc	similar
LMS	0.017904021	7.46102934	3.01E-05	CPC006_HT29_24H:BRD-K69932463-001-03-1:10	0.053824363	-1.650213111	AZD-8055	http://www.selleckchem.com/products/AZD8055.html	similar
LMS	0.011315624	-8.55674922	1.67E-05	CPC006_HT29_24H:BRD-A35588707-001-03-0:1.25	-0.056657224	1.791389985	teniposide	http://en.wikipedia.org/wiki/Teniposide	opposite
LMS	0.00983214	-8.911629532	1.38E-05	CPC006_HT29_24H:BRD-K09907482-001-02-5:40	-0.053824363	1.833391061	PRL-3-inhibitor-I	http://www.sigmaaldrich.com/catalog/product/sigma/p0108?lang=en&region=US	opposite
LMS	0.009123655	-9.191807792	1.21E-05	CPC003_PC3_6H:BRD-K76534306-001-11-0:10	-0.053824363	1.869967229	enrofloxacin	http://en.wikipedia.org/wiki/Enrofloxacin	opposite
LMS	0.03637837	-7.400222018	7.65E-05	CPC001_VCAP_24H:BRD-K31268420-001-01-1:10	-0.053824363	1.797719688	NSC-693868	NULL	opposite
LMS	0.023175679	-7.8760108	4.11E-05	CPC001_VCAP_24H:BRD-K94176593-001-02-9:10	-0.053824363	1.795843426	TWS-119	http://www.selleckchem.com/products/TWS119.html	opposite
LMS	0.031203967	-7.570324861	6.41E-05	CPC006_HA1E_6H:BRD-K62965247-001-01-5:10	-0.050991501	1.80553519	tipifarnib-P2	http://www.selleckchem.com/products/Tipifarnib(R115777).html	opposite
LMS	0.040387942	-7.154691904	8.68E-05	CPC009_VCAP_24H:BRD-K65242613-001-04-6:10	-0.050991501	1.761590489	BRD-K65242613	NULL	opposite
LMS	0.048711638	-7.101178803	0.000114926	CPC012_HT29_6H:BRD-K07023879-001-01-6:10	-0.04815864	1.802521345	BRD-K07023879	NULL	opposite
LMS	0.046796689	-7.63756748	0.000107129	CPC005_MCF7_24H:BRD-K40901640-001-01-0:10	-0.045325779	1.923775032	cinanserin	http://en.wikipedia.org/wiki/Cinanserin	opposite
