# Supplementary material for: Identification of Subtype-Specific Metastasis-Related Genetic Signatures in Sarcoma
Source: Front Oncol. 2020 Oct 6;10:544956. doi: 10.3389/fonc.2020.544956 (PMC7573283; doi:10.3389/fonc.2020.544956)
Supplement: Supplementary file 11 [file Table_11.XLS]

	gene_name	gene_claim_name	entrez_id	interaction_claim_source	interaction_types	drug_claim_name	drug_claim_primary_name	drug_name	drug_chembl_id	PMIDs
DL	SERPINE1	SERPINE1	5054	NCI		9-CIS RETINOIC ACID	9-CIS RETINOIC ACID			9869165
	SERPINE1	SERPINE1	5054	NCI		5-BROMODEOXYURIDINE	5-BROMODEOXYURIDINE			2537681
	SERPINE1	SERPINE1	5054	NCI		DEFIBROTIDE	DEFIBROTIDE	DEFIBROTIDE	CHEMBL2108396	12745658
	SERPINE1	SERPINE1	5054	NCI		RETINOID	RETINOID	ETRETINATE	CHEMBL464	8498603
	SERPINE1	SERPINE1	5054	NCI		LEVOTHYROXINE	LEVOTHYROXINE	LEVOTHYROXINE	CHEMBL1624	16075920
	SERPINE1	SERPINE1	5054	NCI		CETRORELIX	CETRORELIX	CETRORELIX	CHEMBL1200490	16391860
	SERPINE1	P05121	5054	TdgClinicalTrial		UROKINASE	UROKINASE	UROKINASE	CHEMBL1201420
	SERPINE1	SERPINE1	5054	NCI		NORETHISTERONE ACETATE	NORETHISTERONE ACETATE			12385861
	SERPINE1	PAI1	5054	ChemblInteractions	inhibitor	CHEMBL325424	ALEPLASININ	ALEPLASININ	CHEMBL325424
	SERPINE1	SERPINE1	5054	NCI		GM-CSF	GM-CSF	REGRAMOSTIM	CHEMBL2107881	8260700
	SERPINE1	SERPINE1	5054	NCI		ARSENIC TRIOXIDE	ARSENIC TRIOXIDE	ARSENIC TRIOXIDE	CHEMBL1200978	14619570
	SERPINE1	SERPINE1	5054	NCI		VASOPRESSIN	VASOPRESSIN	VASOPRESSIN	CHEMBL373742	7482412
	SERPINE1	SERPINE1	5054	NCI		GLYCYRRHETINIC ACID	GLYCYRRHETINIC ACID	GLYCYRRHIZIN	CHEMBL441687	15070972
	SERPINE1	SERPINE1	5054	NCI		NIMODIPINE	NIMODIPINE	NIMODIPINE	CHEMBL1428	11486117
	SERPINE1	SERPINE1	5054	NCI		ORAL CONTRACEPTIVE	ORAL CONTRACEPTIVE			8392873
	SERPINE1	SERPINE1	5054	NCI		DALTEPARIN	DALTEPARIN	DALTEPARIN SODIUM	CHEMBL1201460	17057417
	SERPINE1	SERPINE1	5054	NCI		RECOMBINANT INTERLEUKIN	RECOMBINANT INTERLEUKIN			1368117
	SERPINE1	SERPINE1	5054	NCI		PREMARIN	PREMARIN	ESTROGENS, CONJUGATED	CHEMBL1201649	8888658
	SERPINE1	SERPINE1	5054	NCI		THROMBOLYTIC AGENT	THROMBOLYTIC AGENT			11041123
	SERPINE1	SERPINE1	5054	NCI		ORLISTAT	ORLISTAT	ORLISTAT	CHEMBL175247	11410822
	SERPINE1	SERPINE1	5054	NCI		CAPTOPRIL	CAPTOPRIL	CAPTOPRIL	CHEMBL1560	9152782
	SERPINE1	SERPINE1	5054	NCI		URIDINE	URIDINE	URIDINE	CHEMBL100259	10712415
	SERPINE1	SERPINE1	5054	NCI		AZA	AZA			8635147
	SERPINE1	SERPINE1	5054	NCI		MCP-1	MCP-1			16452499
	SERPINE1	SERPINE1	5054	NCI		HYDROCHLOROTHIAZIDE	HYDROCHLOROTHIAZIDE	HYDROCHLOROTHIAZIDE	CHEMBL435	11836266
	SERPINE1	SERPINE1	5054	NCI		EPIRUBICIN	EPIRUBICIN	EPIRUBICIN	CHEMBL417	16444429
LMS	LIG1	P18858	3978	TEND		BLEOMYCIN	BLEOMYCIN	BLEOMYCIN (CHEMBL3039590)	CHEMBL3039590
	LIG1	P18858	3978	TdgClinicalTrial		BLEOMYCIN	BLEOMYCIN	BLEOMYCIN (CHEMBL3039590)	CHEMBL3039590
	ISG15	ISG15	9636	MyCancerGenomeClinicalTrial	inhibitor	IRINOTECAN	IRINOTECAN	IRINOTECAN	CHEMBL481
	EPHA7	1827	2045	GuideToPharmacologyInteractions	inhibitor	8170	COMPOUND 8H [PMID: 21561767]
	EPHA7	1827	2045	GuideToPharmacologyInteractions	inhibitor	8141	COMPOUND 66 [PMID: 19788238]
	EPHA7	EHK3	2045	ChemblInteractions	inhibitor	CHEMBL24828	VANDETANIB	VANDETANIB	CHEMBL24828
