# Supplementary material for: Identification of Subtype-Specific Metastasis-Related Genetic Signatures in Sarcoma
Source: Front Oncol. 2020 Oct 6;10:544956. doi: 10.3389/fonc.2020.544956 (PMC7573283; doi:10.3389/fonc.2020.544956)
Supplement: Supplementary file 12 [file Table_12.XLS]

DL	rank	cmap name	mean	n	enrichment	p	specificity	percent non-null
	1	thapsigargin	-0.765	3	-0.952	0.00022	0.0258	100
	2	Prestwick-1082	-0.693	3	-0.912	0.0012	0.0164	100
	3	fusaric acid	0.361	4	0.82	0.00183	0	50
	4	diethylstilbestrol	-0.351	6	-0.68	0.00292	0.0082	66
	5	ethambutol	0.61	5	0.715	0.00439	0	80
	6	proxyphylline	0.541	4	0.773	0.00503	0	75
	7	josamycin	-0.514	5	-0.702	0.00511	0.0067	80
	8	perphenazine	-0.482	5	-0.689	0.00657	0.0509	80
	9	apomorphine	0.393	5	0.685	0.00783	0	60
	10	benzbromarone	-0.406	3	-0.834	0.00915	0.0126	66
	11	vinpocetine	0.392	4	0.729	0.01064	0	50
	12	STOCK1N-35696	-0.657	2	-0.921	0.01266	0.0206	100
	13	phensuximide	0.642	4	0.701	0.01643	0.0098	75
	14	gabapentin	0.552	4	0.699	0.01701	0	75
	15	semustine	-0.547	4	-0.684	0.02168	0.0741	75
	16	calcium pantothenate	0.414	4	0.679	0.02284	0.0248	50
	17	suramin sodium	-0.343	4	-0.67	0.02668	0.0181	75
	18	clorsulon	-0.394	4	-0.668	0.02737	0.0638	50
	19	diphemanil metilsulfate	-0.348	5	-0.601	0.02868	0.049	60
	20	SR-95531	-0.504	4	-0.662	0.02954	0.0429	75
	21	bumetanide	-0.313	4	-0.647	0.0367	0.1419	50
	22	colecalciferol	0.369	4	0.644	0.03873	0.0469	50
	23	tiaprofenic acid	-0.449	4	-0.639	0.04066	0.061	75
	24	scopolamine	0.326	4	0.638	0.04221	0.0303	50
LMS
	1	pyrvinium	0.677	6	0.884	0	0.0186	100
	2	geldanamycin	0.567	15	0.658	0	0.038	80
	3	tanespimycin	0.611	62	0.582	0	0.0259	87
	4	adiphenine	-0.626	5	-0.857	0.0001	0.0403	80
	5	prochlorperazine	0.538	16	0.533	0.0001	0.1117	87
	6	finasteride	-0.281	6	-0.788	0.00018	0	50
	7	aciclovir	-0.399	6	-0.774	0.00026	0	66
	8	midodrine	-0.35	5	-0.841	0.00028	0.0075	60
	9	heptaminol	-0.354	5	-0.832	0.00032	0.0137	60
	10	alvespimycin	0.582	12	0.563	0.00036	0.0402	83
	11	liothyronine	0.664	4	0.867	0.00044	0	100
	12	isoxicam	-0.312	5	-0.819	0.00048	0.0068	60
	13	CP-320650-01	-0.36	8	-0.667	0.0006	0.0072	62
	14	15-delta prostaglandin J2	0.513	15	0.497	0.00062	0.2458	86
	15	lisuride	-0.441	5	-0.802	0.00068	0.0082	80
	16	sulfadimethoxine	-0.503	5	-0.8	0.0007	0	80
	17	ribavirin	-0.37	4	-0.852	0.00092	0	75
	18	amantadine	-0.487	4	-0.852	0.00092	0.0065	75
	19	Prestwick-692	-0.475	4	-0.844	0.00105	0.0068	75
	20	estriol	0.731	4	0.839	0.00105	0	100
	21	thioridazine	0.434	20	0.417	0.00105	0.4795	75
	22	LY-294002	0.313	61	0.243	0.00106	0.5168	60
	23	vancomycin	-0.413	4	-0.84	0.00117	0	75
	24	nadolol	-0.291	4	-0.825	0.00177	0.0461	50
	25	trifluoperazine	0.407	16	0.447	0.00197	0.3221	62
	26	tolnaftate	-0.335	5	-0.743	0.00214	0.0131	60
	27	5224221	0.767	2	0.962	0.00241	0.1341	100
	28	doxazosin	0.648	4	0.808	0.00253	0	100
	29	meteneprost	-0.273	4	-0.81	0.00257	0.0078	50
	30	monorden	0.415	22	0.373	0.00284	0.1123	68
	31	Prestwick-1103	-0.438	4	-0.802	0.003	0.0133	75
	32	tyloxapol	0.651	4	0.798	0.00314	0.0091	100
	33	rottlerin	0.648	3	0.882	0.00324	0.0985	100
	34	merbromin	-0.419	5	-0.726	0.00332	0.0163	60
	35	khellin	-0.365	5	-0.724	0.00348	0.0069	80
	36	piperidolate	0.64	3	0.878	0.00349	0.0085	100
	37	thiamine	-0.499	3	-0.874	0.00399	0.0053	100
	38	talampicillin	0.651	4	0.787	0.00402	0	100
	39	phenoxybenzamine	0.615	4	0.784	0.00412	0.2871	100
	40	penbutolol	-0.621	3	-0.873	0.00415	0	100
	41	meptazinol	0.715	4	0.779	0.00446	0.0079	100
	42	mefloquine	0.576	5	0.712	0.00467	0.1128	100
	43	timolol	-0.267	4	-0.776	0.00515	0.0224	50
	44	doxylamine	0.548	5	0.702	0.00557	0.024	100
	45	gentamicin	-0.41	4	-0.769	0.00573	0.0658	75
	46	isoflupredone	-0.493	3	-0.856	0.00587	0.1417	66
	47	PHA-00745360	-0.336	8	-0.566	0.00592	0.124	62
	48	guanabenz	-0.356	5	-0.694	0.00597	0.0539	60
	49	guanadrel	-0.332	5	-0.693	0.00599	0.029	60
	50	ebselen	0.661	3	0.853	0.00609	0.0203	100
	51	atractyloside	-0.443	5	-0.692	0.00613	0.0227	80
	52	securinine	0.619	4	0.76	0.00627	0.039	100
	53	gabexate	-0.228	4	-0.759	0.00688	0.052	50
	54	metronidazole	-0.429	5	-0.682	0.00743	0.0345	80
	55	0297417-0002B	0.716	3	0.843	0.00755	0.0842	100
	56	repaglinide	0.644	4	0.749	0.00764	0.0463	100
	57	acebutolol	-0.403	5	-0.664	0.01007	0.0119	80
	58	meticrane	0.592	5	0.668	0.01055	0.0561	80
	59	pyrazinamide	0.612	4	0.727	0.01108	0.0158	100
	60	piperlongumine	0.747	2	0.924	0.01125	0.0909	100
	61	fluocinonide	0.543	5	0.665	0.01127	0.0224	100
	62	diphenhydramine	-0.308	5	-0.658	0.01137	0.0963	60
	63	methyldopate	-0.325	4	-0.725	0.01166	0.0219	75
	64	fludrocortisone	-0.202	8	-0.532	0.01199	0.2676	50
	65	ornidazole	0.549	5	0.659	0.0123	0	100
	66	sitosterol	0.574	4	0.717	0.01309	0.0172	100
	67	isometheptene	-0.288	4	-0.714	0.01369	0.069	50
	68	omeprazole	0.649	4	0.712	0.01406	0.0734	100
	69	felbinac	-0.292	4	-0.711	0.01416	0.1702	50
	70	clotrimazole	0.559	5	0.647	0.01534	0.1	100
	71	Prestwick-642	-0.259	4	-0.705	0.01566	0.0621	50
	72	betulinic acid	-0.435	4	-0.703	0.01611	0.0516	75
	73	chlorpromazine	0.335	19	0.346	0.01643	0.0769	63
	74	withaferin A	0.551	4	0.7	0.01677	0.2211	100
	75	metampicillin	-0.324	5	-0.634	0.01684	0.087	60
	76	calcium folinate	-0.408	5	-0.633	0.01706	0.084	60
	77	morantel	0.572	5	0.64	0.0172	0.0294	80
	78	colistin	-0.309	4	-0.695	0.01822	0.0692	50
	79	canadine	-0.52	4	-0.692	0.0193	0.1141	75
	80	alpha-estradiol	0.348	16	0.366	0.01983	0.2016	56
	81	naringenin	-0.379	4	-0.686	0.02091	0.0887	75
	82	proscillaridin	0.67	3	0.782	0.02109	0.099	100
	83	puromycin	0.561	4	0.684	0.02129	0.264	75
	84	flunisolide	0.474	6	0.574	0.02175	0.0423	83
	85	tocainide	-0.436	4	-0.683	0.02206	0.0903	75
	86	levonorgestrel	0.438	6	0.572	0.02263	0.1085	66
	87	CP-863187	-0.471	4	-0.68	0.02286	0.0529	75
	88	nimesulide	0.512	4	0.679	0.02318	0.0064	100
	89	apramycin	0.638	4	0.676	0.02417	0.0297	100
	90	fluspirilene	0.637	4	0.675	0.02441	0.0402	100
	91	protriptyline	0.644	4	0.674	0.02495	0.0726	100
	92	promazine	0.491	6	0.564	0.02543	0.0471	83
	93	Prestwick-983	-0.395	3	-0.767	0.02582	0.0685	66
	94	imidurea	0.554	3	0.765	0.02594	0.0551	100
	95	loxapine	0.532	4	0.67	0.02612	0.0106	100
	96	pentetrazol	0.593	4	0.663	0.02926	0.0541	100
	97	methacholine chloride	0.539	3	0.753	0.02946	0.0165	100
	98	quinisocaine	0.589	4	0.662	0.02974	0.0642	100
	99	roxarsone	0.579	4	0.661	0.03028	0.0095	100
	100	dihydrostreptomycin	-0.195	5	-0.596	0.03082	0	60
	101	digoxin	0.513	4	0.659	0.03117	0.2056	75
	102	cefamandole	-0.39	4	-0.654	0.03312	0.0833	75
	103	Prestwick-689	0.555	4	0.654	0.03322	0.0438	100
	104	dexpropranolol	0.628	3	0.743	0.03331	0.0517	100
	105	sulfadoxine	0.568	3	0.742	0.03341	0.0376	100
	106	colecalciferol	0.593	4	0.653	0.03402	0.0234	100
	107	carbenoxolone	-0.416	4	-0.652	0.03438	0.0377	75
	108	cloperastine	0.544	6	0.543	0.03482	0.2124	83
	109	pheneticillin	-0.365	4	-0.651	0.03503	0.1177	50
	110	PNU-0251126	-0.318	6	-0.544	0.03574	0.1067	66
	111	torasemide	0.582	4	0.649	0.03607	0.0091	100
	112	pempidine	0.388	5	0.588	0.03667	0.0133	80
	113	bretylium tosilate	-0.366	4	-0.647	0.03682	0.044	75
	114	eticlopride	-0.385	4	-0.647	0.0369	0.0909	75
	115	mephenytoin	-0.324	4	-0.643	0.03885	0.0769	75
	116	benzocaine	-0.351	4	-0.643	0.03893	0.1611	50
	117	antimycin A	0.504	5	0.58	0.04079	0.1461	80
	118	Prestwick-967	-0.186	4	-0.639	0.04084	0.055	75
	119	ampyrone	-0.337	5	-0.575	0.04153	0.0694	60
	120	tomatidine	0.367	4	0.634	0.04388	0.0206	75
	121	MS-275	0.627	2	0.852	0.04428	0.1862	100
	122	PF-00539745-00	-0.377	3	-0.719	0.04547	0.1111	66
	123	5255229	0.626	2	0.846	0.04783	0.0474	100
	124	glipizide	-0.289	5	-0.562	0.0491	0.0533	60
	125	phthalylsulfathiazole	0.399	5	0.565	0.0496	0.2743	60
	126	indoprofen	-0.279	4	-0.624	0.04971	0.1333	75
UPS
	1	Prestwick-692	-0.744	4	-0.961	0	0	100
	2	GW-8510	0.909	4	0.956	0	0.0663	100
	3	trichostatin A	0.373	182	0.227	0	0.8389	60
	4	doxorubicin	0.885	3	0.953	0.0001	0.0559	100
	5	camptothecin	0.847	3	0.952	0.0001	0.1429	100
	6	isoflupredone	-0.672	3	-0.958	0.00022	0	100
	7	8-azaguanine	0.869	4	0.872	0.00036	0.0414	100
	8	trifluoperazine	0.497	16	0.488	0.00038	0.2164	75
	9	fludrocortisone	-0.314	8	-0.677	0.00044	0.0282	62
	10	H-7	0.826	4	0.859	0.00052	0.0889	100
	11	monensin	-0.391	6	-0.742	0.00064	0.0163	66
	12	lisuride	-0.438	5	-0.794	0.00074	0.0246	80
	13	adiphenine	-0.569	5	-0.79	0.00078	0.0887	80
	14	finasteride	-0.359	6	-0.727	0.00079	0.0244	66
	15	heptaminol	-0.378	5	-0.787	0.00084	0.0137	60
	16	LY-294002	0.372	61	0.246	0.00086	0.5034	62
	17	alsterpaullone	0.79	3	0.918	0.00114	0.0814	100
	18	skimmianine	0.732	4	0.834	0.00115	0.0082	100
	19	atractyloside	-0.5	5	-0.762	0.00144	0.0076	80
	20	biperiden	-0.564	5	-0.762	0.00144	0.0612	80
	21	0175029-0000	0.737	6	0.714	0.00153	0.1412	100
	22	meticrane	0.79	5	0.765	0.00162	0.0094	100
	23	anisomycin	-0.55	4	-0.827	0.00171	0.0593	100
	24	medrysone	0.625	6	0.708	0.00171	0.0551	83
	25	etiocholanolone	-0.333	6	-0.696	0.00191	0.0779	66
	26	metronidazole	-0.444	5	-0.734	0.00274	0.0138	80
	27	mitoxantrone	0.767	3	0.88	0.00339	0.0351	100
	28	cloperastine	0.696	6	0.671	0.0035	0.0622	100
	29	sulconazole	0.813	4	0.794	0.00352	0.0188	100
	30	viomycin	-0.312	4	-0.788	0.00406	0.1007	50
	31	Prestwick-691	-0.684	3	-0.872	0.00415	0.0329	100
	32	ifenprodil	0.729	4	0.782	0.00426	0.0073	100
	33	timolol	-0.499	4	-0.781	0.00469	0.0224	75
	34	folic acid	-0.413	4	-0.781	0.00475	0.0221	75
	35	guanadrel	-0.443	5	-0.704	0.00503	0.029	80
	36	nadolol	-0.473	4	-0.776	0.00513	0.0769	75
	37	quinpirole	-0.275	4	-0.776	0.00515	0	50
	38	betonicine	-0.346	6	-0.648	0.0053	0	83
	39	promazine	0.636	6	0.651	0.00534	0.0059	100
	40	trazodone	0.777	3	0.852	0.00611	0.0448	100
	41	daunorubicin	0.738	4	0.759	0.00643	0.0859	100
	42	deptropine	0.69	4	0.757	0.0066	0.0225	100
	43	alpha-estradiol	0.261	16	0.405	0.0067	0.0853	50
	44	calcium folinate	-0.465	5	-0.682	0.00747	0.0534	80
	45	ondansetron	-0.401	4	-0.752	0.00762	0.0075	75
	46	tranexamic acid	-0.448	5	-0.68	0.00773	0.1409	80
	47	betaxolol	0.734	4	0.748	0.00774	0.0086	100
	48	phthalylsulfathiazole	0.634	5	0.683	0.00813	0.0443	80
	49	vancomycin	-0.248	4	-0.745	0.00837	0.0276	50
	50	midodrine	-0.426	5	-0.663	0.01029	0.1053	80
	51	podophyllotoxin	-0.304	4	-0.73	0.01064	0.1373	50
	52	Prestwick-1103	-0.533	4	-0.727	0.01142	0.0596	75
	53	3-acetamidocoumarin	-0.511	4	-0.719	0.01265	0.1429	75
	54	sanguinarine	0.791	2	0.919	0.01312	0.1184	100
	55	ajmaline	-0.329	3	-0.809	0.014	0.0355	66
	56	clorsulon	-0.342	4	-0.71	0.01446	0.0426	50
	57	amodiaquine	0.58	4	0.707	0.01526	0.0063	100
	58	amiodarone	0.514	5	0.646	0.01562	0.0345	80
	59	clofazimine	-0.372	5	-0.639	0.01562	0.0539	80
	60	ethotoin	0.562	6	0.59	0.01593	0.0579	83
	61	chenodeoxycholic acid	-0.282	4	-0.7	0.01701	0.1	50
	62	metaraminol	0.608	4	0.692	0.01884	0.0075	75
	63	pheneticillin	-0.453	4	-0.691	0.01952	0.0719	75
	64	PF-00539745-00	-0.368	3	-0.784	0.02057	0.0815	66
	65	gentamicin	-0.395	4	-0.687	0.02071	0.1118	75
	66	tocainide	-0.491	4	-0.686	0.02109	0.0839	75
	67	apramycin	0.456	4	0.684	0.0214	0.0297	75
	68	oxybenzone	-0.276	4	-0.684	0.02168	0.0775	50
	69	atropine	0.649	4	0.682	0.0219	0.0484	100
	70	eticlopride	-0.291	4	-0.682	0.02226	0.0455	50
	71	lycorine	-0.424	5	-0.617	0.02243	0.2333	60
	72	cortisone	0.646	3	0.775	0.02299	0.0744	100
	73	etofenamate	0.583	4	0.675	0.02441	0.0175	75
	74	cyproterone	0.71	4	0.675	0.02447	0.024	100
	75	CP-645525-01	0.638	3	0.764	0.02614	0.073	100
	76	trimethobenzamide	-0.337	5	-0.606	0.02679	0.1141	60
	77	thioguanosine	0.623	4	0.667	0.02751	0.1941	75
	78	foliosidine	-0.255	6	-0.558	0.02799	0.0815	66
	79	sulfinpyrazone	0.668	4	0.665	0.02863	0.0171	100
	80	fluspirilene	0.583	4	0.663	0.02912	0.0503	100
	81	trapidil	-0.359	3	-0.756	0.02958	0.0741	66
	82	cyclobenzaprine	-0.399	4	-0.661	0.02966	0.05	75
	83	cinchonine	-0.276	4	-0.66	0.03032	0.142	50
	84	rifampicin	-0.334	4	-0.652	0.03453	0.0929	75
	85	pyrvinium	0.534	6	0.543	0.03488	0.3861	83
	86	colistin	-0.279	4	-0.649	0.03593	0.0846	50
	87	6-azathymine	0.574	4	0.648	0.03654	0.0507	75
	88	diethylstilbestrol	-0.299	6	-0.542	0.03655	0.0984	66
	89	felbinac	-0.285	4	-0.647	0.0369	0.2766	50
	90	famprofazone	0.481	6	0.538	0.03766	0.1015	83
	91	tracazolate	0.6	4	0.646	0.0378	0.0504	75
	92	demeclocycline	0.546	6	0.536	0.03893	0.0382	83
	93	piromidic acid	0.647	4	0.643	0.03911	0.04	100
	94	Prestwick-860	0.614	4	0.642	0.0401	0.0569	100
	95	ellipticine	0.622	4	0.641	0.04044	0.2762	75
	96	adrenosterone	0.693	4	0.637	0.04241	0.0435	100
	97	thapsigargin	-0.399	3	-0.726	0.04268	0.271	66
	98	furazolidone	-0.273	4	-0.635	0.04297	0.0828	50
	99	pimozide	0.647	4	0.634	0.04404	0.1759	100
	100	demecarium bromide	-0.29	4	-0.632	0.0448	0.1337	75
	101	ceforanide	-0.265	4	-0.631	0.0455	0.0838	75
	102	nortriptyline	0.679	4	0.632	0.04573	0.2114	100
	103	levobunolol	-0.325	4	-0.63	0.04603	0.1603	50
	104	luteolin	0.574	4	0.631	0.04607	0.1825	75
	105	dapsone	-0.268	5	-0.565	0.04718	0.1679	60
	106	oxymetazoline	0.534	4	0.627	0.04844	0.0411	100
	107	pilocarpine	-0.253	4	-0.626	0.04846	0.1503	50
	108	bacitracin	-0.305	3	-0.712	0.04867	0.0424	66
MFS
	1	phenoxybenzamine	0.751	4	0.926	0.00004	0.1436	100
	2	daunorubicin	0.768	4	0.925	0.00004	0.0303	100
	3	irinotecan	0.74	3	0.957	0.0001	0.1091	100
	4	SC-560	-0.653	3	-0.95	0.00022	0.0121	100
	5	aciclovir	-0.357	6	-0.76	0.00034	0	66
	6	thiamphenicol	-0.554	5	-0.827	0.00038	0.0133	80
	7	tolfenamic acid	0.597	4	0.865	0.00046	0	100
	8	idazoxan	0.59	4	0.848	0.00076	0	100
	9	resveratrol	0.411	9	0.61	0.0009	0.1912	66
	10	withaferin A	0.577	4	0.823	0.00167	0.1105	100
	11	podophyllotoxin	-0.301	4	-0.808	0.00263	0.0588	50
	12	urapidil	0.463	4	0.8	0.003	0	75
	13	PF-00539745-00	-0.626	3	-0.883	0.00318	0.0296	100
	14	gentamicin	-0.33	4	-0.795	0.0035	0.0461	50
	15	azacitidine	0.662	3	0.876	0.00357	0.0721	100
	16	scopolamine	0.424	4	0.787	0.00402	0	75
	17	apramycin	0.35	4	0.783	0.00412	0.0099	50
	18	apigenin	0.376	4	0.781	0.0043	0.1016	50
	19	etiocholanolone	-0.269	6	-0.652	0.00479	0.1169	50
	20	midodrine	-0.551	5	-0.699	0.00539	0.0752	80
	21	eticlopride	-0.487	4	-0.766	0.00613	0	75
	22	betaxolol	0.47	4	0.761	0.00625	0.0086	75
	23	tetracycline	-0.354	5	-0.689	0.00661	0.0377	60
	24	disopyramide	-0.307	4	-0.76	0.00676	0.0118	50
	25	flunisolide	0.301	6	0.634	0.00733	0.007	50
	26	GW-8510	0.62	4	0.743	0.00828	0.2431	75
	27	hexetidine	-0.282	4	-0.742	0.00877	0.055	50
	28	clofazimine	-0.518	5	-0.672	0.00887	0.0308	80
	29	Prestwick-642	-0.352	4	-0.74	0.00899	0.0414	50
	30	0175029-0000	0.39	6	0.612	0.01065	0.2765	50
	31	Gly-His-Lys	-0.406	3	-0.825	0.0107	0.0522	66
	32	ajmaline	-0.332	3	-0.818	0.01202	0.0355	66
	33	chenodeoxycholic acid	-0.339	4	-0.72	0.01251	0.0923	50
	34	yohimbic acid	-0.393	3	-0.805	0.0147	0.0235	66
	35	vinblastine	-0.47	3	-0.803	0.01548	0.1069	66
	36	guanabenz	-0.334	5	-0.639	0.01548	0.1231	60
	37	doxorubicin	0.503	3	0.802	0.01584	0.1173	66
	38	ioversol	0.219	4	0.698	0.01711	0	50
	39	lisuride	-0.397	5	-0.633	0.01718	0.2787	60
	40	deferoxamine	0.386	8	0.513	0.01741	0.0201	62
	41	demeclocycline	0.462	6	0.584	0.01784	0.0153	66
	42	ethionamide	-0.421	3	-0.793	0.01789	0.025	66
	43	cefamandole	-0.368	4	-0.695	0.01832	0.025	50
	44	methylergometrine	0.267	4	0.692	0.01876	0.0208	50
	45	cyproterone	0.309	4	0.691	0.019	0.016	50
	46	biperiden	-0.492	5	-0.625	0.01923	0.2449	60
	47	sulfametoxydiazine	0.311	4	0.689	0.01963	0.0377	50
	48	corbadrine	0.261	4	0.688	0.02001	0.0199	50
	49	mitoxantrone	0.472	3	0.784	0.02057	0.0819	66
	50	Prestwick-692	-0.561	4	-0.68	0.02298	0.1293	75
	51	azacyclonol	-0.311	5	-0.609	0.02567	0.0392	60
	52	clorsulon	-0.532	4	-0.672	0.02586	0.0567	75
	53	bromocriptine	0.36	5	0.612	0.02619	0.0709	60
	54	econazole	-0.291	4	-0.67	0.02638	0.1111	50
	55	metampicillin	-0.429	5	-0.6	0.02934	0.1015	60
	56	zomepirac	0.539	4	0.663	0.0294	0.0588	75
	57	diphenylpyraline	-0.374	6	-0.553	0.03029	0.1125	66
	58	timolol	-0.511	4	-0.659	0.03062	0.1567	75
	59	alpha-yohimbine	-0.459	3	-0.752	0.03089	0.0207	66
	60	niridazole	0.301	4	0.655	0.0329	0.0155	50
	61	pentoxifylline	-0.444	5	-0.588	0.03463	0.1343	60
	62	PHA-00851261E	0.277	8	0.47	0.03731	0.0423	62
	63	tubocurarine chloride	0.428	4	0.644	0.03863	0.0174	75
	64	butoconazole	0.478	4	0.644	0.03893	0.0608	75
	65	etifenin	0.514	4	0.642	0.03995	0.029	75
	66	mefexamide	-0.483	4	-0.636	0.04229	0.047	75
	67	methapyrilene	0.315	4	0.636	0.04275	0.0526	50
	68	mecamylamine	0.392	3	0.716	0.04499	0.0155	66
	69	terguride	0.204	8	0.46	0.04499	0.0081	50
	70	W-13	-0.426	2	-0.85	0.04515	0.0403	100
	71	dapsone	-0.428	5	-0.565	0.04718	0.1679	60
	72	H-7	0.425	4	0.628	0.0479	0.3889	50
